# Supplementary material for: [Retracted] In Silico Identification and Mechanism Exploration of Active Ingredients against Stroke from An‐Gong‐Niu‐Huang‐Wan (AGNHW) Formula
Source: Hindawi journal article supplement (doi:10.1155/2022/5218993), 2022-01-01
Supplement: f1 [file 5218993.f1.pdf]

InChikey

PFCVZKFJHRCLCC-POIBATFSA-N
JXSIVIRDWWRQRT-UJDOISQJSA-N
DTGKSKDOIYIVQL-UHFFFAOYSA-N
DTGKSKDOIYIVQL-WEDXCCLWSA-N
DSSYKIVIOFKYAU-GMSGGAONNSA-N
INOSMXBKABLUIL-DCKDXSSCSA-N
NPNUFJAVOONJE-FLFDDASRSA-N
NJICGAVMYWKCMW-GWJXCKMPASA-N
UFJPCTSKTPSJTK-SGAOCFLWSA-N
OPFTUNCRGUEPRZ-QLFBSQMISA-N
PSZDOEIIIJFCFE-OSQDELBUSAN-N
FAMPSKZZVDUYOS-PGPZXUPKSA-N
DTGKSKDOIYIVQL-OYNCUSHFSA-N
DTGKSKDOIYIVQL-MRTMQBJTSA-N
MIJYXULNPSFWEK-GTOFXWBISA-N
HFPZCAJZSCWRBC-UHFFFAOYSA-N
WEEGYLXZBRQIMU-UHFFFAOYSA-N
CRPUJAZIXJMDBK-UHFFFAOYSA-N
UAHWPYUMFXFJY-UHFFFAOYSA-N
OGLDWXZKYODSOB-UHFFFAOYSA-N
IHPKGUQCSIINRJ-CSKARUKUSA-N
XMGQYMWWDQXHM-UHFFFAOYSA-N
WUOACPNHFRMFPN-UHFFFAOYSA-N
MIJYXULNPSFWEK-UHFFFAOYSA-N
BQOFWKZOCNGFEC-UHFFFAOYSA-N
HAVYZKHVTLAPDZ-PRUKLFJYSA-N
NPNUFJAVOONJE-WDZFZDKYSA-N
NVEQFIOZRFFVFW-UHFFFAOYSA-N
OPFTUNCRGUEPRZ-UHFFFAOYSA-N
HIGQPQRQIQDZMP-FLIBITNWSA-N
DSSYKIVIOFKYAU-UHFFFAOYSA-N
XGFDWZLOGKFUGO-UHFFFAOYSA-N
AZBICJOBHDKYGG-LUAWRHEFSA-N
PSZDOEIIIJFCFE-UHFFFAOYSA-N
LBMAECHMNKURES-UHFFFAOYSA-N
NJICGAVMYWKCMW-UHFFFAOYSA-N
VHVOLFRBFDOSH-NSCUHMNNSA-N
BCKIAEZZQAYK GK-UHFFFAOYSA-N
RUJPNZNXGCHGID-UHFFFAOYSA-N
WTARULDDTDQWMU-UHFFFAOYSA-N
KQAZVFVOEIRWHN-UHFFFAOYSA-N
CDOSHBSSFJOMGT-UHFFFAOYSA-N
PFCVZKFJHRCLCC-UHFFFAOYSA-N
UHWIZIJICYWABA-UHFFFAOYSA-N
UFJPCTSKTPSJTK-UHFFFAOYSA-N
AOWMBRPPHGNFDX-UHFFFAOYSA-N
KMKFOIBUKYMVRJ-UHFFFAOYSA-N
INOSMXBKABLUIL-YHYXMXQVSA-N
YAPXSXYFLHDPCK-HKWUFEEASA-N
JXSIVIRDWWRQRT-UHFFFAOYSA-N
PRVKS KWND SLRBY-UHFFFAOYSA-N
XTGYWZXUYFAABL-WLRTZDKTSA-N
LSKFUSLVUZISST-UHFFFAOYSA-N
BPLQKQKXWHCZSS-UHFFFAOYSA-N
ZBPQOWMVWIKUHQ-UHFFFAOYSA-N
PREBVFJICNPEKM-YDWXAUTNSA-N
DSSYKIVIOFKYAU-GMSGGAONNSA-N

Canonical smiles

CC(=C)C1CC[C@]2([C@H]1[C@H]1CC[C@]2)OC[C@]1(C)[C@@H](O)[C@H](O)C[C@]1OC1CC2C(C1(C)CC2)(C)C
O[C@H]1C[C@@H]2C([C@@]1(C)CC2)(O=C1C[C@@H]2C([C@]1(C)CC2)(C)C
CC1=CCC(=C)[C@@H]2[C@@H](CC1)C
CC1=CCCC(=C)[C@@H]2[C@@H](CC1)CC(=CCC[C@@]([C@H]1CC[C@@]2([C@]OCC([C@H]1CC[C@@]2([C@@H]1CC[C=C][C@]1(C)CC[C@H](C[C@H]1C(=C)COC[C@]12CC[C@@]3(C(=CC[C@H]4[C@]CC1=CCC(C)(C)C=CCC(=CCC1)C
O[C@H]1C[C@H]2C([C@]1(C)CC2)(C)C
O[C@@H]1C[C@@H]2C([C@@]1(C)CC:
O[C@H]1CC[C@]2([C@H](C1(C)C)CC[C@]C1ccc(cc1)C(C)C
CC12CCC(CC1)C(O2)(C)C
C=C1C2CCC(C1(C)C)C2
C=CC(=C)CCC=C(C)C
CC1=CCC(C=C1)C(C)C
C=C/C(=C/CC=C(C)C)/C
CC1=CCC(CC1)C(=C)C
CC1=CCC(CC1)C(O)(C)C
OC1CCC2(C(C1(C)C)CCC1(C2CC=C2C1
CC1=CCC2C(C1)C2(C)C
C=C1CCCC(=CCC(C=CC1)(C)C)C
CC1=CCCC(=C)C2C(CC1)C(C2)(C)C
C=C1CCC2OC2(CCC2C1CC2(C)C)C
C=CC1(C)CCC(CC1C(=C)C)C(=C)C
C/C(=C/COC(=O)C)/CCC=C(C)C
O=C1CC2C(C1(C)CC2)(C)C
OCC1(C)CC(O)CC2(C1(O)CCC1(C2CC=(CCOC(=O)c1c(NC(=O)/C=C\c2ccc(c(c2)C
OCC12CCC3(C(=CCC4C3(C)CCC3C4(C)
C=C1CC2CCCC3C1(C)CCCC(C23)(C)C
CC(=CCCC(C1CCC2(C1CCC1C2(C)CCC
C/C=C/c1ccc2c(c1)OCO2
CC1CC=C(C(C1)C)C
CC(=C)C1CCC(CC1)(C)O
C=C1CCC2CC1C2(C)C
CC1=CCC2(C1C2)C(C)C
C=CC(CCC=C(C)C)(O)C
CC(=C)C1CCC2(C1C1CCC3C(C1(C)CC2
CC(=CC(=O)OC1c2c(ccc3c2oc(=O)cc3)O
OCC(C1CCC2(C1CCC1C2(C)CCC2C1(C
OC(=O)C1CC(C)(C)CC2C1CCC1(C2=CC
OCC1OC(OC(=O)C23CCC(CC3C3=CCC
CC1=CCC(=C)C2C(CC1)C(C2)(C)C
C/C/1=C\CC/C(=C\CCC/C=C\C(CC1)C(C
OCC1(C)C(O)C(O)CC2(C1CCC1(C2CC=(
CCCC(=O)c1c(O)c(Cc2c(O)c(CC3=C(O)C
OC/C=C/1\CN2CCC34C2CC1C1=CCC(=
OCC(C(c1ccc(c(c1)OC)O)O)O
C=CCc1cc(OC)c(c(c1)OC)OC
OCC12CCC3C(=CCC4C3(C)CCC3C4(C)(
O=C(CC(=O)/C=C/c1ccc(cc1)O)/C=C/c1c
O=C1C[C@@H]2C([C@]1(C)CC2)(C)C

ULDHMXUKGWMISQ-VIFPVBQESA-N  
FINHMKGKINIASC-UHFFFAOYSA-N  
XISBISVWIJDEQH-CQSZACIVSA-N  
ZIUSSTSXXLLKKK-KOBPDPA  
PSA-N  
QRMPRVXWPCLVNI-YYFQZIE  
XSA-N  
KDPFMRXIVDLQKX-WDZFDZ  
DKYSA-N  
RDFLLVCQYHQOBU-ZOTFF  
YTFSA-N  
JLJLRLWOEMWYQK-OB  
DJNFEBSA-N  
ZOWHLBOPCIHIHW-KQB  
HUJHSA-N  
WZRRJZYYGOOHRU-UQJ  
CXHNCSA-N  
MHVYWTXXZIFXDT-YG  
NOGLJPSA-N  
CQDCLVASIPBLIZ-ZXUM  
CLPVSA-N  
CPGCVOVWHCWVTP-UH  
FFFAOYSA-N  
YGSDEFMSJLZEOE-UH  
FFFAOYSA-N  
QFVCWQNGOCGQJL-W  
FYKWJGLSA-N  
GSLDEZOOOSBFGP-UH  
FFFAOYSA-N  
SQRUWMQAWMLKPR-D  
ZEUPHN  
YSA-N  
KVRQQFBSAHPTAB-FU  
YYPFFW  
SA-N  
FMHJNIRDGYFPEC-CH  
ICSPHLSA-N  
IZSSLGQVLP  
HINU-SESN  
JUDKSA-N  
FZPYMZUVXJUAQA-Z  
DUSSCGKSA-N  
TXIKNNOOLCGADE-D  
HMGWJH  
JSA-N  
IVSZLXZYQVIEFR-UH  
FFFAOYSA-N  
IHPKGUQCSIINRJ-NT  
MALXAH  
SA-N  
WKOLLVMJNQIZCI-UH  
FFFAOYSA-N  
GYHFUZHODSMOHU-UH  
FFFAOYSA-N  
INNSGICBAVEKCC-UH  
FFFAOYSA-N  
HFPZCAJZSCWRBC-UH  
FFFAOYSA-N  
XVOHEL  
PNOXGRBQ-LXQMTT  
SMSA-N  
WUOACPNHFRMFPN-UH  
FFFAOYSA-N  
WEEGYLXZBRQIMU-UH  
FFFAOYSA-N  
GRWFGVWFFZKLT  
I-UHFFFAOYSA-N  
WTARULDDTDQW  
MU-UHFFFAOYSA-N  
NDVASEGYNIMXJL-UH  
FFFAOYSA-N  
DSSYKIVIOFKYAU-UH  
FFFAOYSA-N  
WBYWAXJHAXSJNI-S  
REVYHEPSA-N  
OYHQOLUKZR  
VURQ-HZJYTT  
RNSA-N  
TUNFSRHWOTWDNC-UH  
FFFAOYSA-N  
MBIPADCEH  
SKJDQ-UHFFFAOYSA-N  
IQSPYJZC  
WMAJLU-WAYWQWQ  
TSA-N  
BOBTWVZHS  
PRDFC-UHFFFAOYSA-N  
VLXDPFLIRFYIME-UH  
FFFAOYSA-N  
ICWHTQRTTHCUHW-UH  
FFFAOYSA-N  
GIBQERSGRNPMEH-UH  
FFFAOYSA-N  
TWVJWDMOZJXUID-UH  
FFFAOYSA-N  
SECPZKHBENQXJG-F  
PLPWB  
NLSA-N  
DTGKSKDOIYIVQL-UH  
FFFAOYSA-N  
JMSVCTWVEWCHDZ-UH  
FFFAOYSA-N  
CRPUJAZIXJMDBK-UH  
FFFAOYSA-N  
NPNUFJAVOOONJE-WD  
ZFDZDKYSA-N  
KGEKLUUHTZCSIP-UH  
FFFAOYSA-N  
UAHWPYUMFX  
YFJY-UHFFFAOYSA-N  
CDOSHBSSFJOMGT-UH  
FFFAOYSA-N  
OGLDWXZKYODSOB-UH  
FFFAOYSA-N  
IHPKGUQCSIINRJ-C  
SKARUK  
USA-N  
YKFLAYDHMOAS  
IY-UHFFFAOYSA-N  
ITYNGVSTWVVPIC-UH  
FFFAOYSA-N  
PHWISBHSBNDZDX-UH  
FFFAOYSA-N

CC(=C)[C@H]1CC=C(C(=O)C1)C  
Cc1nc(C)c(nc1C)C  
CC(=C)CCC[C@H](C1=CCC(=CC1)C)C  
COc1cc/C=C/C(=C/C(=O))/C=C/c2ccc(c(c  
CC([C@@H]1C[C@]23O[C@]1(O)CC(=C  
CC1=CCC[C@]@H](C)C(=O)C[C@H](C(=O  
OC[C@H]1O[C@]@H](OC2cc(O)cc3c2cc(O  
OC(=O)C1[C@H]2[C@]3([C@H]4[C@]51  
OC(=O)[C@H]1[C@H]2[C@]3([C@H]4[C  
OC(=O)C1[C@H]2[C@]3([C@H]4[C@]51  
OC(=O)[C@H]1[C@H]2[C@]3([C@H]4[C  
CC1C[C@]@]23C[C@H]1CC[C@H]3[C@]  
CCCCCCCCCCCCCCCCCCCC(CCCCCC  
OC(=O)c1cccc1O  
COc1cc/C=C/C(=O)C(C(Cc2ccc(cc2)C)O  
C=C1CCOC1=O  
OCCC(=C)C(=O)O[C@@H]1O[C@H](CO  
OC[C@H]1O[C@]@H](OC(=O)C(=C)C(CC  
OC[C@H](C(=C)C(=O)OC[C@H]1OC(O)[  
OCCC(=C)C(=O)O[C@@H]1O[C@H](CO  
CC(=CC(=O)C[C@]@H](C1=CCC(=CC1)C  
CC(=C1C[C@H]2[C@H]([C@]@](CC1=O)  
Cc1cccc(c1)C  
C=C/C(=C\C=C(C)C)/C  
COc1cc(ccc1O)C(=O)O  
CCCCCCCCC=O  
CC(=C)C1CCC2(C(C1)(C)C(=C)CCC2)C  
Cc1ccc(cc1)C(C)C  
CC1=CC(=O)c2c(CC(=CCC1)C)occ2C  
CC1=CCC(CC1)C(O)(C)C  
CC12CCC(CC1)C(O2)(C)C  
CC1=CCC2CC1C2(C)C  
C=C1CCC2CC1C2(C)C  
C=C1CCC2(C1C2)C(C)C  
O=C1CC2C(C1(C)CC2)(C)C  
OC(=O)/C=C\C1cccc1  
CCCCC/C=C\C/C=C\C\CCCCCCCC(=O)O  
CCCCCCCCCCCCCCCC(=O)O  
CC1CCC=C2C1(C)C1C(C1(C)C)CC2  
CC1CC=CC(C)CCC(CC1)C(C)C  
CC1=CC2C(CC1)C(C)(O)CCC2(C)C  
CC(C1CCC2(C3C1C2C(=CC3)C)C)C  
CC1CCC=C(C21CCC(C2)C(O)(C)C)C  
CC(=C1CCC(C2=C(C1)C(C)CC2)C)C  
CC1CCC(CC2=C1CCC2C)C(O)(C)C  
CCCCC/C=C\C\CCCCCCCC(=O)O  
OC1CC2C(C1(C)CC2)(C)C  
COc1cc(cc(c1O)OC)C(=O)O  
C=C1C2CCC(C1(C)C)C2  
CC1=CCCC(=C)C2C(CC1)C(C2)(C)C  
CC(=O)OC1CC2C(C1(C)CC2)(C)C  
C=CC(=C)CCC=C(C)C  
C=CC(CCC=C(C)C)(O)C  
CC1=CCC(C=C1)C(C)C  
C=C/C(=C/CC=C(C)C)/C  
CC1=CCC(=CC1)C(C)C  
CC1CCC2C1C1C(C1(C)C)CCC2=C  
CC(C1CCC(=C)C=C1)CCC=C(C)C

FMXKKHBXBBAQBC-UHFFFAOYSA-N  
XLPDVYGDNRIFV-UHFFFAOYSA-N  
XPGWKKLDFXNBPJ-UHFFFAOYSA-N  
WPYMKLBDIGXBTP-UHFFFAOYSA-N  
OWMJDOUOHDOUFG-FNCQTZNRSA-N  
FRMCCTDTYSRUBE-UHFFFAOYSA-N  
XMGQYMWWDQXHM-UHFFFAOYSA-N  
DPRCKWANIKZGTF-NTUHNPAUSA-N  
FAMPSKZZVDUYOS-KXWHQPPKSA-N  
LCOSCMLXPAQCLQ-UHFFFAOYSA-N  
FKWGCEDRLLNZOZ-UHFFFAOYSA-N  
CRDAMVZIKSXKFV-YFVJMOTDSA-N  
QMVPMAAFGQKVCJ-UHFFFAOYSA-N  
BWHPKBOLJFNCPW-HZPYOLDOSA-N  
OELMAFBLFOKZJD-UHFFFAOYSA-N  
RRAFCDWBNXTKKO-UHFFFAOYSA-N  
LFJQCDVYDGGFCH-UHFFFAOYSA-N  
VFLDPWHFBUODDF-KYPMKJFLSA-N  
RECUKUPTGUEGMW-UHFFFAOYSA-N  
MOYAFQVGZPNRA-UHFFFAOYSA-N  
PDSNLYSELAIEBU-UHFFFAOYSA-N  
BQOFWKZOCNGFEC-UHFFFAOYSA-N  
GNWJYPQYWBLOGD-UHFFFAOYSA-N  
BOPIMTNSYWYZOC-UHFFFAOYSA-N  
GFJIQNADMLPFOW-UHFFFAOYSA-N  
YOVSPTNQHMDJAG-UHFFFAOYSA-N  
JESIHYIJKKUWIS-UHFFFAOYSA-N  
USDOQCCMRDNVAH-UHFFFAOYSA-N  
WGTRJVCFDUCKCM-UHFFFAOYSA-N  
NPJICTMALKLTFW-UHFFFAOYSA-N  
CUUMXRBJJIDIAU-UHFFFAOYSA-N  
SPCXZDDGSGTVAV-UHFFFAOYSA-N  
KZJWDPNRJALLNS-UHFFFAOYSA-N  
NGSWKAQJJWESNS-UTCJRWHEA-N  
QAIPRVGONGVQAS-RQOWECAXSA-N  
FFRFJIZJLZXEJX-PORYWJCVSA-N  
MXDMETWAEIGFOE-UHFFFAOYSA-N  
RMZHSBMIZBMVMN-UHFFFAOYSA-N  
FARHRLFSUJIINR-UHFFFAOYSA-N  
BCMMNIMNKUKKCI-UHFFFAOYSA-N  
MUYSJOCNDLHUPJ-CLTKARDFSA-N  
PFIXJSCFTAVWBW-UHFFFAOYSA-N  
QXEXMTIZXNCRJO-UHFFFAOYSA-N  
FNMDHMSGEIODFP-UHFFFAOYSA-N  
JWUVBGKPYDWLJC-UHFFFAOYSA-N  
JBUPYYZICGGNGI-UHFFFAOYSA-N  
KHOTZHZBHNDKOB-UHFFFAOYSA-N  
ISFMXVMWEWLJGJ-UHFFFAOYSA-N  
LWEBVMKVDYHRS-UHFFFAOYSA-N  
AWUBJLRYWHOLFV-WZUFQYTHSA-N  
JZIQIHGNLKNKQF-UHFFFAOYSA-N  
QRMPRVXWPCLVNI-UHFFFAOYSA-N  
KDPFMRXIVDLQKX-WDFZDKYSA-N  
JXBMAOPQNNTXPM-UHFFFAOYSA-N  
YBJIFGYQRRWWFW-UHFFFAOYSA-N  
HICAMHOOTMOHPA-UHFFFAOYSA-N  
IZLBLUIBVMGMII-UTCJRWHEA-N  
NEQGOKAKPXXESR-ACCUITESSA-N

CC1=CCCC(C1=C)(C)C  
Cc1ccc(cc1)C(O)(C)C  
CC1CCC2C1C1C(C1(C)C)CCC12OC1  
OC(=O)c1ccccc1  
O=C(CCc1ccccc1)/C=C/C=C/c1ccccc1  
C=C1CCC2C(C3C1CCC3(C)O)C2(C)C  
CC1=CCC(CC1)C(=C)C  
OC(CCc1ccccc1)CC/C=C/c1ccccc1  
CC1=CCC(C)(C)C=CCC(=CCC1)C  
CC1=CC2C(=C(C)CCCC2(C)C)CC1  
CC(=CCCC(c1ccc(c1)O)C)C  
OC/C=C(/CC/C=C(/CCC=C(C)C)\C)C  
OCCC(CCC=C(C)C)C  
COc1cc(CCC(=O)C=C(/C=C/c2ccc(c2)C)C  
COc1cc(CCC(CC(Cc2ccc(c2)OC)O)O)O  
C=CCc1ccc(c1)OC)O  
CC(C1CCC(=C)C=C1)C  
COc1cc(/C=C/C(=O)CC(=O)/C=C\c2ccc(c  
CC(c1ccc(c1)O)C)C  
CC1=CCC(=C(C)C)CC1  
C=C1C2CCC3C1(C)CCCC(C23)(C)C  
CC1=CCC2C(C1)C2(C)C  
CC1CCC(C2(C1CC(CC2)C(C)C)C)O  
C=C1CCCC2(C1CC(CC2)C(O)(C)C)C  
C=CC1(C)CCC(CC1C(=C)C)C(O)(C)C  
C=C1CCCC2(C1CC(CC2)C(=C)C)C  
Cc1ccc(cc1)C(O)C  
CC1=CCC2C(C1)C(CC=C2C)C(C)C  
CC1CCC2=C(C)CCC3C(C12)C3(C)C  
CCC(C(C)C)CCC(C1CCC2C1(C)CCC1C2  
CC(C1CC=C(c2c1cc(C)cc2)C)C  
CC1CCC2C(C3=C(CCC13)C)C2(C)C  
CCC(C(C)C)CCC(C1CCC2C1(C)CCC1C2  
OC(=O)/C=C\c1ccc(cc1)O  
OC(=O)/C=C\c1ccc(c1)O)O  
COc1cc(/C=C\C(=O)CC(=O)/C=C\c2ccc(c  
C=CC1(C)CCC(=CC1C(=C)C)C(C)C  
C=C1CCCC2(C1CC(=C(C)C)CC2)C  
CC(=O)CCC1C2C1(C)CC(=O)C(C2)C(O)(  
O=C1OC2C(=C1C)CC1C(C2)(C)C(O)CC  
COc1cc(CCC(=O)CC(=O)/C=C\c2ccc(c2  
CC1=C2C(=O)c3c(CC2(C(C1)O)C)ccc3  
Cc1ccc2c1C(=O)C1C(C2)(C)C(O)CCC1(C  
CC(C1=CCC(C2C(C1)C(C)(O)CC2)(C)O)(  
CC(=O)CCC1=CCC(=C(C)C)C(=O)CC1C  
CC(C1CC2(OC1=O)C(C)CCC2C(=C)C)C  
CC(=C1CC2(OC1=O)C(C)CCC2C(=C)C)C  
CC(=C1CC23OC1(O)C=C(C3CCC2C)C)C  
CC(=O)CCC1C2C1(C)CC1C(=C(C)C(=O)  
O=C(CC(=O)/C=C\c1ccc(cc1)O)CCc1ccc(  
CC(=O)CCC1C2C1(C)CC1(C(=C(C)C(=O)  
CC(C1CC23OC1(O)CC(=C)C3CCC2C)C  
CC1=CCCC(C)C(=O)CC(C(=O)C1)C(C)C  
CCC(=O)CC1=CCC(=C(C)C)C(=O)CC1C  
CC1CCc2c(C1=O)c1c(C)coc1cc2C  
C=CC1(C)Cc2ccc(c2CC1C(=C)C)C  
COc1cc(/C=C\C2=CC(=O)CC(O2)c2ccc(c  
OC(CC(=O)CCc1ccccc1)/C=C/c1ccccc1

ZYPUZCWWTYIGFV-WDZFFZDKYSA-N  
BQSLMQNYHVFRDT-UHFFFAOYSA-N  
PXPIJNMPDAFWF-XBXARRHUSA-N  
ZVMJXSJCBRAPD-UHFFFAOYSA-N  
ATJVZXXHKSYSYELS-FNORWQNLISA-N  
DHNGCHLFKUPGPX-TWGGIWWQCSA-N  
OELWYQGRQUQQPD-XBXARRHUSA-N  
VMDXHYHOJPKFEK-ADUATRDFSA-N  
ZLESWHXADLWJPV-YHYXMXQVSA-N  
OYONKNQJEXRUQZ-VLLDNGIUSA-N  
RBXMGYRKSXKXNT-UHFFFAOYSA-N  
SLGKCOCDZZQQLY-LXQM TTSMSA-N  
NKDVMZOMVJQUDC-UTCJRWHESA-N  
RKQDKXOBRXTSFS-QZFXANLSA-N  
GLKQAHXBJLGAFT-UHFFFAOYSA-N  
XXFPSLVNWRANRW-UHFFFAOYSA-N  
FPRYGNXOFHMLF-UHFFFAOYSA-N  
TXIKNNOOLCGADE-UHFFFAOYSA-N  
VZWGRQBCURJOMT-UHFFFAOYSA-N  
STRABSCAWZINIF-UHFFFAOYSA-N  
OZNHATCGPKOFBH-UHFFFAOYSA-N  
IEDKVDCIEARIU-UHFFFAOYSA-N  
YZBOVSFWWNVKRJ-UHFFFAOYSA-N  
JWRBAZYQWTVQSD-UHFFFAOYSA-N  
DAUDFKSHOYLOOB-UHFFFAOYSA-N  
MQJGAHXKAZGEGI-IUNAMMOKSA-N  
NMKYCFSSNAWAALS-UHFFFAOYSA-N  
TZUNCSSGETYEPM-UHFFFAOYSA-N  
CSKINCSXMLCMAR-UHFFFAOYSA-N  
XNGKCOFXDHYSGR-UHFFFAOYSA-N  
HSRRCZPSLXXKJL-XEQVNJCQSA-N  
IYDMICQAKLQHLA-UHFFFAOYSA-N  
XLEYFDVVXLMULC-UHFFFAOYSA-N  
AFDXODALSZRGH-DAXSKMNVSA-N  
JSWOSPDAFLJHZ-UHFFFAOYSA-N  
YFDIAFVTFRYMNI-UHFFFAOYSA-N  
HJFYFYWETUVIHT-UHFFFAOYSA-N  
OVURIZIJDDTXJS-FNCQTZNSA-N  
ISIMGBQRFXXNON-VHOZIDCHSA-N  
CVIVANCKIBYAOP-UITAMQMPSA-N  
BQDXDGDOYPUUOD-UHFFFAOYSA-N  
HPNXJLIPUVXDNH-UHFFFAOYSA-N  
ZHVYOZUDBBMXPD-UHFFFAOYSA-N  
ONMRIOINLXQN-UHFFFAOYSA-N  
CKDRPCYJCDMPFO-UHFFFAOYSA-N  
FYIUFPCMCZWVNH-UHFFFAOYSA-N  
JUDCTVXWYFNGQQ-YNYJRQBSA-N  
DXGIJGSOOPTGDC-UHFFFAOYSA-N  
GIHNTRQPEMKFKO-HQCVNHCJSA-N  
PALMCMYYFAHUGA-DGSDLINQSA-N  
URJZIVZWAWBZCT-ZSOIEALJSA-N  
VNFVWNGSEJXPCSW-QPEQYQDCSA-N  
GTHJHHZMCSHKDZ-UHFFFAOYSA-N  
ZWEHNKRNPVVGH-UHFFFAOYSA-N  
YGDZDWJVKOQPZDX-UHFFFAOYSA-N  
PCBKWKNYISJGPJ-BUHFOSPRSA-N  
DLPRXTUOPLIHNV-FOCLMDBBSA-N  
RNZJKBXC MRFWKJ-CCKMTBCVSA-N

CC1=CCCC(C)C(=O)CC(=C(C)C)C(=O)C  
C=CC1(C)CCC(=C(C)C)CC1C(=C)C  
OC(CCc1ccc(cc1)O)CC/C=C/c1cccc1  
C=CC1(C)Cc2occ(c2C(=O)C1C(=C)C)C  
CCOC(=O)/C=C/c1ccc(c(c1)OC)O  
CCOC(=O)/C=C/c1ccc(cc1)OC  
OC(CCc1ccc(c(c1)O)O)CC/C=C/c1cccc1  
CC1=CCc2c(CC(=CCC1)C)occ2C  
CC1=CCCC(C)C(=O)Cc2c(C1)occ2C  
OC/C(=C\1/CC=C(C)CCC=C(CC1=O)C)/C  
CC(C1CCC(C)C(=O)CCC2(C(C1)O2)C)C  
CC1=CCCC(=CCC2=C(C(=O)OC2C1)C)C  
COc1cc(/C=C\C(=O)CC(=O)CC(c2ccc(c(c  
CC1=CCCC2(C)OC2CC(C=CC1)(C)C  
CC1CCC2C1C1C(C1(C)C)CC1C2(C)O1  
CC(=O)CCC1CCC(=C(C)C)C(=O)C=C1C  
CC1=C2CCC(C2C2C(CC1)C2(C)C)(C)O  
CC(=C1CC2C(C(CC1=O)(C)O)CCC2(C)O  
CCCCCCCCCCCCOC(=O)C  
CC(=C1CCC2(C(C1)C(C)(O)CCC2)C)C  
CC1CCC23C1C1C(C1(C)C)CCC3(O2)C  
CCCCCCCCCCCCCCCC(=O)C  
CCCCOC(=O)c1cccc1C(=O)O  
CC(=C1CC23OC1(O)CC(=C3CCC2C)C)C  
CC(=C1CC2C(=C(CC1=O)C)CCC2(C)O)C  
COc1cc(/C=C\C(=O)CC(=O)/C=C/c2cc(O  
CC1=CC2(O)OC3(C1CCC3C)CC12OC1((  
Cc1cc(O)c2c(c1)C(Cc1c2cc2C(O)C(C(C)  
CC1CCC2=C1CC1CCC2(C1(C)C)C  
CC(=CCCc1cccc1)C  
COc1cc(/C=C\C(=O)CC(=O)/C=C/c2ccc(c  
c1ccc(cc1)c1cccc2c1cccc2  
CC(=O)c1c(O)cc(cc1O)O  
COc1ccc(cc1)/C=C\C(=O)O  
CC1=Cc2c(CC1)c(C)cc1c2c(C)co1  
CC(=CC(=O)CC(C1CC(O)C(C2C1O2)(C)(  
COc1cc(CCC(=O)CC(=O)CCc2ccc(cc2)O  
OC(CCc1cccc1)/C=C/C=C/c1cccc1  
COc1cc(/C=C\C(=O)/C=C/c2ccc(c(c2)OC)  
CC1=CCCC2(C)OC2C(=O)c2c(C1)occ2C  
O=C1OC2C(=C1C)CC1C(C(C2)(C)O)CC  
CC1=C2CC3C(C)(O)CCC3(C(C=C2OC1=  
OC1CCC2C1CC1=C(C)C(=O)OC1CC2(C  
CC1=C2CC3C(C)(O)CCC3(C(C=C2OC1=  
C=C1Cc2occ(c2C(=O)C2(C1CCC2C)O)C  
O=C1OC2(C(=C1C)CC1C3(C(C2O)(C)O3  
COc1cc(/C=C\C(=O)/C=C/c2ccc(c(c2  
O=C1OC2(C(=C1C)CC1C(C(C2)(C)O)CC  
CC1=CCC(C)(C)C=CC(=O)C(=CCC1)C  
O=C/C=C\C1ccc(cc1)O)/C=C/C=C\C1ccc  
CC(=O)OC(CCc1cccc1)CC/C=C/c1cccc  
O=C(CCc1cccc1)CC/C=C/c1cccc1  
CC(=C1CC2OC2(C)CCC2C(CC1=O)(C)O  
CCC(=O)C  
CC1CCc2c1cc(cc2C)C(=O)O  
CCCCCCCCCCCC/C=C/CC(=O)O  
CCCCCCCCCCCC/C=C/CC(=O)O  
CC(=O)OCC(C1C=C2OC2(C)CC=CC(CC

SVJCSSAWCKGHMZ-HVOHDJRZSA-N  
OQZCUYXRSFWCJU-UHFFFAOYSA-N  
FTVWIRXFELQLPI-UHFFFAOYSA-N  
LGEKQNSNNQGALI-UHFFFAOYSA-N  
SNEAPXILYVCZFK-UHFFFAOYSA-N  
ZMIQNSSHYBJKIL-UHFFFAOYSA-N  
QVRYUUYIWAQHV-AVWDGMTFSA-N  
NAAJVHFFAXWBOK-UHFFFAOYSA-N  
OZQAPQSEYFAMCY-UHFFFAOYSA-N  
XOCANRBEQZQNAQ-UHFFFAOYSA-N  
LRDZCBICVMXPBB-UHFFFAOYSA-N  
ABLPGPZENVRRH-UHFFFAOYSA-N  
QJOWFYQIUZMPRY-UHFFFAOYSA-N  
ZRSXYQBSTGSATR-UHFFFAOYSA-N  
UYPPHUAQDGVVKN-UHFFFAOYSA-N  
UYEWRTKHKAVRDI-ASVGJQBISA-N  
NVEQFIOZRFFVFW-UHFFFAOYSA-N  
JSNRRGGBADWTMC-NTCAYCPXSA-N  
WRYLYDPHFGVWKC-UHFFFAOYSA-N  
FUCYIEXQVQJBKY-UHFFFAOYSA-N  
ZQPPMHVWECSIRJ-KTKRTIGZSA-N  
DOIRQSBPFJWKBE-UHFFFAOYSA-N  
IPCSVZSSVZVIGE-UHFFFAOYSA-N  
GLZPCOQZEFWAFX-YFHOOESVSA-N  
NGSWKAQJJWESNS-ZZXKWVIFSA-N  
IWQURBSTAIRNAE-UHFFFAOYSA-N  
QIQXTHQIDYTFRH-UHFFFAOYSA-N  
DEBDFZGNZTYPMF-UHFFFAOYSA-N  
VMYXUZSZMNBRCN-UHFFFAOYSA-N  
SSRDTRQCJGXMGT-PXNMLYILSA-N  
KKOXKGN SUHTUBV-UHFFFAOYSA-N  
IXQJBPRUTQTCMW-UHFFFAOYSA-N  
HUZJLWLCLJEXEL-UHFFFAOYSA-N  
OGJFTQVVQQMGJG-UHFFFAOYSA-N  
OPFTUNCRGUEPRZ-UHFFFAOYSA-N  
CAULGCQHVOVVRN-SVGXSMIJSAN  
YHQGMUYUUMAZJR-UHFFFAOYSA-N  
LMVGRKPOXLBIFQ-UHFFFAOYSA-N  
GXEGJTGWYVZSNR-OMQMMEOVSA-N  
NUQDPKOFUKFKFD-UHFFFAOYSA-N  
WMOPMQRJLLIEJV-UHFFFAOYSA-N  
PREBVFJICNPEKM-JTAXDKCCSA-N  
HJTVQHVGGMGKONQ-LUZURFALSA-N  
ITIGZFMSPAFZAE-UHFFFAOYSA-N  
OSIFVLKZUWRNBN-UHFFFAOYSA-N  
MBUWIGIPGMJVMN-UHFFFAOYSA-N  
RHBOHEXDGUUIY-UHFFFAOYSA-N  
NRBFEAZFHRHFFQ-UHFFFAOYSA-N  
WYIJOOQDLOBLCP-UHFFFAOYSA-N  
XZRVRYFILCSYSP-UHFFFAOYSA-N  
JIJQKFPGBBEJNF-UHFFFAOYSA-N  
WTWBUQJHJGUZCY-UHFFFAOYSA-N  
KJPRLNWUNMBNBZ-QPJXVBHSA-N  
PUSAAHYGRLPDMQ-UHFFFAOYSA-N  
YXAKCQIIROBKOP-HSSGTREWSA-N  
SNVNUOWZKGGIRP-HCKUEKJXSA-N  
SGAYOTORECIFCJ-UHFFFAOYSA-N  
OIRFZVJHADZVMD-UHFFFAOYSA-N

OC/C(=C/1\CC2OC2(C)CCC=C(CC1=O)C  
CC(CCC1C2C1(C)CC(=O)C(=C(C)C)C2)(  
Oc1ccc(cc1)C1CC(=O)c2c(O)cc(cc2O)O  
CC(=O)CCC1C2C1(C)CCC(=O)C2  
Cc1cc(O)c2c(c1)c(ccc2C)C(C)C  
CC(=CC(=O)CC(C1=CC=C(CC1)C)C)C  
COc1cc(/C=C\C(=O)/C=C\c2ccc(cc2)O)cc  
CC(=CC(=O)CC(c1ccc(cc1)C)C)C  
CC1=CCCC2(C1CC(CC2)C(=C)C)C  
CC(=CC(=O)CC(C1CC=C(C=C1)C)C)C  
CC(=CC(=O)CC(=C)C1CCC(=CC1)C)C  
C=CC1(C)CC(=O)C(=C(C)C)CC1C(=C)C  
CC(=CC(=O)CC(C1C=CC(C(C1)O)(C)O)C  
O=CC(c1ccc(c2c1cc(C)cc2)C=O)C  
CC1CCC2C3(C1(C)C1C(C1(C)C)CC3)O2  
COc1cc(/C=C/C(=O)OCC(=O)/C=C/c2ccc  
C=C1CCC2OC2(CCC2C1CC2(C)C)C  
C=CC(=C)CC/C=C(/CCC=C(C)C)C  
CC1=CCC(CC1)(O)C(C)C  
CC1=CC2C(=C(C)CCC2C(C)C)CC1  
CCCCCCCC/C=C\CCCCCCCC(=O)O  
CCCCOC(=O)c1cccc1C(=O)OCCCC  
CCCCCCCCCCCCCCCC(=O)O  
OC/C=C(\CCC=C(C)C)/C  
OC(=O)/C=C/c1ccc(cc1)O  
CC(C1=CC2C(C(CC1)(C)O)CCC2(C)O)C  
CCCCCCCCCCCCCCCC(=O)O  
CC(=C1CC23OC1(O)CC(=C)C3CC2C)C  
CC(=CCCC(c1ccc(cc1)C)C)C  
CC1=CCCC2(C)C3CC(C2C(=O)c2c(C1)O  
CC(=CCCC(C1CC=C(C=C1)C)C)C  
CC(=C1CC2C(C)(O)CCC2(C(=CC1=O)C)  
CC(=O)CCC1C2C1(C)CC(=O)C(=C(C)C)(  
Cc1cc2oc(=O)c(c2cc2c1CCC2C)C  
C=CC1(C)CCC(CC1C(=C)C)C(=C)C  
CC1=CCC(=C(C)C)C(=O)CC(=CCC1)C  
CC1=CC=C(CC1)C(C)C  
Cc1cc2occ(c2cc2c1ccc2C)C  
CC1=CCCC(=CCC(=C(C)C)CC1)C  
CC1CCC2C(C3=C1CCC3C)C2(C)C  
CC1=C2CC(CCC2(CCC1)C)C(O)(C)C  
O=C(CC(=O)/C=C/c1ccc(cc1)O)/C=C\c1c  
COc1cc(/C=C/C(=O)CC(=O)/C=C/c2ccc(c  
C=C1CC(=O)C(=C(C)C)CC2C1CCC2(C)C  
CC(=CC(=O)CC(c1ccc(c(c1)O)C)C)C  
CC1=CC(=O)C(=C(C)C)CC2(C1CCC2(C)  
CC1=CC(=O)C(=C(C)C)CC2C1CCC2(C)C  
CC(=CC(CC(c1ccc(cc1)C)C)O)C  
CC(=CC(=O)CC(c1ccc(cc1O)C)C)C  
CC(=CCCC(=C)C1CCC(=CC1)C)C  
CC(C1CCC(=C)C=C1)CC(=O)C=C(C)C  
O=Cc1ccc(cc1)C(C)C  
O=C/C=C/c1cccc1  
O=C(OCC1OC(OC(=O)CC[N+](=O)[O-])C  
O/C(=C\C(=O)/C=C/c1ccc(cc1)O)/C=C/c1  
OC/C(=C/CC/C(=C\Cc1cc(O)ccc1O)/C)/C  
CC(=CCCC1(C)C2CCC1(C)C(C2)O)C  
CC(=CCCC1=CCCC(C1)C(=C)CCC=C(C)



OGCGGWYLHSJRFY-UHFFFAOYSA-N  
ZRALSGWEFCBTJO-UHFFFAOYSA-N  
CGJJPOYORMGCGE-UHFFFAOYSA-N  
ULEBESPCVWBNIF-UHFFFAOYSA-N  
FULLTSYFDLSFSF-UHFFFAOYSA-N  
QNAYBMKLOCPYGJ-UHFFFAOYSA-N  
DJNCIOAUQVURTQ-UHFFFAOYSA-N  
CKLJMWTZIZZHCS-UHFFFAOYSA-N  
HVYWMOMLDIMFJA-UHFFFAOYSA-N  
ODKSFYDXXFIFQN-UHFFFAOYSA-N  
ZRALSGWEFCBTJO-UHFFFAOYSA-N  
BPYKTIZUTYGOLE-BMNRKXRESA-N  
GWZYPXHJZCRAJ-UDMDDCJJSA-N  
RUDATBOHQWOJDD-CGAHXEJXSA-N  
BHQCQFFYRZLCQQ-OELDTZBJSAN  
KXGVEGMKQFWNSR-LLQZFEROSA-N  
DNVPQKQSNYMLRS-CLTUJMCISA-N  
SMEROWZSTRWXGI-HVATVPOCSA-N  
XOAAWQZATWQOTB-UHFFFAOYSA-N  
MIJYXULNPSFWEK-UHFFFAOYSA-N  
DNVPQKQSNYMLRS-BQYQJAHWSA-N  
WCGUUGGRBIKTOS-UHFFFAOYSA-N  
GWZYPXHJZCRAJ-NAUAOTQLSA-N  
BPYKTIZUTYGOLE-VVCLLGATSA-N  
WVULKSPCQVQLCU-UHFFFAOYSA-N  
JUFYZLWTPPZFMH-UHFFFAOYSA-N  
DLYVTEULDNMQAR-UHFFFAOYSA-N  
ZHUOOEGSSFNTNP-UHFFFAOYSA-N  
AWDRATDZQP NJFN-UHFFFAOYSA-N  
WBWWGRHZICKQGZ-UHFFFAOYSA-N  
RUDATBOHQWOJDD-UHFFFAOYSA-N  
OJLLODMRNXRZIT-UHFFFAOYSA-N  
GRQROVWZGGDYSW-UHFFFAOYSA-N  
KXGVEGMKQFWNSR-UHFFFAOYSA-N  
ZESRJSPZRD MNHY-UHFFFAOYSA-N  
XCGSFFUVFURLIX-UHFFFAOYSA-N  
RFDAIACWWDREDC-UHFFFAOYSA-N  
HVYWMOMLDIMFJA-UHFFFAOYSA-N  
OEYIOHPDSNJKLS-UHFFFAOYSA-N  
SNKFFCBZYFGCQN-BJMVGYQFSA-N  
HPYDSVWYXXKHRD-UHFFFAOYSA-N  
DJNCIOAUQVURTQ-UHFFFAOYSA-N  
BHQCQFFYRZLCQQ-UHFFFAOYSA-N  
SMEROWZSTRWXGI-UHFFFAOYSA-N  
RCNSAJSGRJSBKK-YKSNQIBWSA-N  
KRAPUBRHQOHVHM-IFADSCNNSA-N  
DAIDKOMWNKGKSP-UHFFFAOYSA-N  
BPYKTIZUTYGOLE-IFADSCNNSA-N  
POJWUDADGALRAB-PVQJCKRUSA-N  
CBMYJHIOYJESB-ULTMTAQRSA-N  
CBMYJHIOYJESB-GCXXXECGSA-N  
RAJWOBTTGJROA-WZNAKSSCSA-N  
RAJWOBTTGJROA-QJISAEMRSA-N  
CBMYJHIOYJESB-YISWTCPOSA-N  
YEW SFUFGMDJFFG-QAGGRKNESA-N  
AEMFNILZOJDQLW-QAGGRKNESA-N  
QGXBDMJGAMFCBF-HLUDHZFRSA-N  
OFNSUWBAQRCHAV-OYQUVCAкса-N

O=CCC1CC=C(C1(C)C)C  
NC(=N)N  
O=CC(CC(=O)O)N  
NC(=NCCCC(C(=O)N)N)N  
OCCCCN=C(N)N  
CC(C(=O)O)N  
CC(CCCC(C1CCC2=C3C(CCC12C)C1(C)  
OC(=O)CC(C(=O)O)N  
CC(CCCC(C1CCC2C1(C)CCC1C2CC=C2  
OC(=O)C(CCCN=C(N)N)N  
NC(=N)N  
C=CC1=C(C)/C(=C\c2[nH]c(c(c2C)CCC(=  
C=CC1=C(C)/C(=C\c2[nH]c(c(c2C)CCC(=  
O[C@ @H]1CC[C@]2([C@ @H](C1)C[C@  
O[C@ @H]1CC[C@]2([C@ @H](C1)CC([C  
O[C@ @H]1CC[C@]2([C@ @H](C1)CC[C@  
OC1CC[C@]2(C(=CC=C3[C@H]2CC[C@  
O[C@ @H]1CC[C@]2([C@ @H](C1)CC[C@  
NCCS(=O)(=O)O  
OC1CCC2(C(C1(C)C)CCC1(C2CC=C2C1  
OC1CCC2(C(=CC=C3C2CCC2(C3CCC2(  
CC1CCC2(C(C1C)C1=C3C3C(C1(CC2)C  
C=CC1=C(C)/C(=C/c2[nH]c(c(c2C)CCC(=  
C=CC1=C(C)/C(=C/c2[nH]c(c(c2C)CCC(=  
OC1CCC2(C(C1)CCC1C2CC(O)C2(C1CC  
O=C(OC(C(=O)O)Cc1ccc(c(c1)O)O)CCc1  
COC(=O)CCC(C1CCC2C1(C)C(O)CC1C2  
COC(=O)CCC(C1CCC2C1(C)C(O)CC1C2  
OC1CCC2(C(C1)CCC1C2CC(O)C2(C1CC  
OC1CCC2(C(C1)CC(C1C2CC(O)C2(C1C  
OC1CCC2(C(C1)CC(C1C2CCC2(C1CCC  
COc1c(O)c(OC)cc2c1c(=O)n(cc2)C  
COC(=O)CCC(C1CCC2C1(C)CCC1C2C(  
OC1CCC2(C(C1)CCC1C2CC(O)C2(C1CC  
OCC(=O)C1CCC2C1(C)CCC1C2CCC2=C  
O=C(C1CN(C)C2C(=C1)c1cccc3c1c(C2)c  
OC1CCC2(C(C1)CC(C1C2CC(O)C2(C1C  
CC(CCCC(C1CCC2C1(C)CCC1C2CC=C2  
OCC[N+](C)(C)C  
O=C(OC(C(=O)O)Cc1ccc(c(c1)O)O)/C=C/  
OC(=O)CNC(=O)C(Cc1ccc(cc1)O)N  
CC(CCCC(C1CCC2=C3C(CCC12C)C1(C)  
OC1CCC2(C(C1)CC(C1C2CC(O)C2(C1C  
OC1CCC2(C(C1)CCC1C2CCC2(C1CCC2  
C=CC1=C(C)C(=NC1=O)/C=c1/[nH]/c(=C  
C=CC1=C(C)/C(=C/C2=C(C)C(C(=N2)CC  
CCCNC(=O)CCCC1CCC2(C1(C)C(O)CC1  
C=CC1=C(C)/C(=C/c2[nH]c(c(c2C)CCC(=  
NC(=O)N[C@ @H]1NC(=O)NC1=O  
O[C@ @H]1CC[C@]2([C@ @H](C1)CC[C@  
O[C@ @H]1CC[C@]2([C@ @H](C1)CC[C@  
O=C1CC[C@]2([C@ @H](C1)CC[C@ @H]1[  
O=C1CC[C@]2([C@ @H](C1)CC[C@ @H]  
O[C@H]1CC[C@]2([C@ @H](C1)CC[C@  
O=C1CC[C@]2(C(=C1)C=C[C@ @H]1[C@  
O=C1CC[C@]2(C(=C1)CC[C@ @H]1[C@  
O[C@ @H]1CC[C@]2([C@H](C1)CC[C@  
C/C(=C\C=C\C=C\C=C\C=C\C=C\C=C[C@]1

MDFFNDBAEOHIDY-UHFFFAOYSA-N  
MUNWAHDYFVYIKH-WDSKDSINSA-N  
DTGKSKDOIYIVQL-UHFFFAOYSA-N  
DTGKSKDOIYIVQL-QXFUBDJGSA-N  
RECUKUPTGUEGMW-UHFFFAOYSA-N  
GXGJIOMUZAGVEH-UHFFFAOYSA-N  
NYOXRYXRWJDKP-SHLKSLFASA-N  
HVYWMOMLDIMFJA-DPAQBDFASA-N  
VQMSRUREDGBWKT-UHFFFAOYSA-N  
VKOSQMWSWLZQPA-UHFFFAOYSA-N  
RSLTVQQROJUNCD-ALCCZGGFSA-N  
FUGDHQXYVPQGLJ-UHFFFAOYSA-N  
XOEMDGMZEQVNDX-QRVSFSA-N  
YZPIVPVXEUAJNR-UHFFFAOYSA-N  
MPLDCQODSRHTBW-UHFFFAOYSA-N  
SVZLTRRSGWXPBL-UHFFFAOYSA-N  
QFZHDMKCNVVKG-PVYCLFTASA-N  
MDSZBCFPVUABGB-PVYCLFTASA-N  
VOXZDWNPVJITMN-SFFUCWETSA-N  
VOXZDWNPVJITMN-ZBRFXRBCSA-N  
VADSVXSGIFBZLI-IBEHDNSVSA-N  
GCLHKQZTLUKUTE-UHFFFAOYSA-N  
OZIPFYKAIIOVEJ-ODWUMMNUSA-N  
QGXBDMJGAMFCBF-BNSUEQOYSA-N  
QGXBDMJGAMFCBF-LUJOEAJASA-N  
VMYTXBKVYDESSJ-HKQXQEGQSA-N  
FMGSKLZLMKYGDP-USOAJAOKSA-N  
GQQXMGOLSQFKPZ-ODWDTFMPSA-N  
RZGFUGXQKMEMOO-BSANDHCLSA-N  
JFDNMLUPLXZXGV-RKAGECJXSA-N  
FPDSMLMTMDHJQT-UHFFFAOYSA-N  
XEKNCTZVXNUNGM-UHFFFAOYSA-N  
DOUMFZQKYFQNTF-WUTVXBCWSA-N  
UWKAYLJWKGQEPM-LBPRGKRZSA-N  
YVBJWBLZYPRBNN-LWUSAIQQSA-N  
JGXUYPSOOTZEGY-LWUSAIQQSA-N  
MDDBLJFAZVVHGO-YXIOUMEFSA-N  
HDVPJYNBUXNSEW-YXIOUMEFSA-N  
CVMWCRDXSQGRSJ-UHFFFAOYSA-N  
XCZTYQNVNLGKI-LVUHIJSRSA-N  
AJWIFVNLXHFTFD-AHXFZLPISA-N  
IEVYLQISZQFFGA-JXMROGBWSA-N  
YGUUXLXMTKARJN-DHZHZOJOSA-N  
RPESHUOYLLJEQJ-HTQZYQBOSA-N  
GVPGXFIINYYZAR-UHFFFAOYSA-N  
ALHUZKCOMYUFRB-UHFFFAOYSA-N  
IMNKABOILQOFDL-UHFFFAOYSA-N  
QBGZFGDIXJTOI-UHFFFAOYSA-N  
OSOIQJGOYGSIMF-UHFFFAOYSA-N  
YQKQOLPNKNHLBO-DVAISLESA-N  
HHNPREGNVFCOP-MHSMQCRSA-N  
BTRIXFBTQFTXAB-SGKFEUNSSA-N  
FCDLCPWAQCPTKC-UHFFFAOYSA-N  
WRYLYDPHFGVWKC-JTQLQIEISA-N  
QKYDQSUA FNWVTI-UDNSVAPOSA-N  
KXSDPILWGMGFJMM-AEJSXWLSSA-N  
MGSRCZKZVOBKFT-UHFFFAOYSA-N  
BAIRXMFVFKLWSE-UHFFFAOYSA-N

COc1c2OCOc2c2c3c1ccnc3C(=O)c1c2cc  
O[C@H]1C[C@H]([N+](C1)(C)C)C(=O)[O-  
OC1CC2C(C1(C)CC2)(C)C  
O[C@@H]1C[C@H]2C([C@]1(C)CC2)(C)  
CC(c1ccc(c(c1)O)C)C  
CCc1ccc(c2c(c1)c(C)cc2)C  
CC(CCC[C@@H])([C@H]1CC[C@H]2[C@  
CC(CCC[C@H])([C@H]1CC[C@H]2[C@]1  
OC(=O)c1ccnc2c1cccc2  
COc1cc2oc(cc(=O)c2c(c1OC)O)c1ccc(c(c  
O=C1CCCCCCCCC/C=C\CCC1  
O=C1CCCCCCCCCCCCC1  
O=C1CCCCCCCCC/C=C\C\CCC1  
C1CCCCCCCCc2nc(CC1)ccc2  
Oc1ccc2c(c1)nc(oc2=O)c1cccc1  
Oc1ccc(c(c1)Nc1cc(O)ccc1C(=O)O)C(=O)  
O=C1OC[C@H]2O[C@@H](Oc3cc4c(O[C  
[O-]c1ccc(cc1)c1[o+]c2cc(O)cc3c2cc1O[C  
Oc1ccc2c(c1)CC[C@@H]1[C@@H]2CC[C@  
Oc1ccc2c(c1)CC[C@@H]1[C@@H]2CC[C@  
C=CCc1ccc(c(c1)OC)O[C@@H]1O[C@H  
CC(=O)c1c(C)cc2c(c1O)c(O)c(cc2)c1ccc2  
CC/C=C\CCO[C@@H]1O[C@H](CO)[C@  
O[C@@H]1CC[C@]2([C@@H](C1)CC[C@  
O[C@@H]1CC[C@]2([C@@H](C1)CC[C@  
O[C@@H]1CC[C@]2(C=C1)CC[C@@H]  
O[C@@H]1CC[C@]2(C=CC[C@@H]3[C@  
OC[C@H]1O[C@@H](OCC/C=C\CC2=C(  
OCC/C=C\C[C@@H]1[C@H](CCC1=O)C  
OC[C@H]1O[C@@H](OCC/C=C\C[C@@  
CC1CCCCCCCC(c2nc(C1)ccc2)O  
OC1C(C)CCCCCCCCc2nc1ccc2  
O=C(O[C@@H](C(=O)O)Cc1ccc(c(c1)O)(  
C=C[C@](OC(=O)C)(CCC=C(C)C)C  
OC[C@H]1O[C@@H](O[C@]2(C)CC=C(C  
CC(=O)OC[C@H]1O[C@H](O[C@]2(C)C  
OC[C@H]1O[C@H](O[C@]2(C)CC=C(C  
OC[C@H]1O[C@H](O[C@]2(C)CCC(=C  
CC1CCCCCCCCCCCC(=O)C1  
OCC/C=C\C[C@@H]1[C@H](CCC1=O)C  
OC[C@H]1O[C@@H](OCC/C=C\C[C@@  
OC/C(=C/CCC(=C)C=C)/C  
C=CC(=C)CC/C=C(/COC(=O)C)C  
C[C@H](CC[C@H](C(C)C)OS(=O)(=O)O)  
CC1CCCCCCCCCCCCC(C1)O  
CC1CCCCCCCCCCCCC(=O)C1  
CC1CCCCCCCCC2nc(C1)ccc2  
C1CCCCCCCC2nc(CC1)ccc2  
O=C1CCCCCCCCCCCCC1  
OC[C@H]1O[C@@H](O[C@@H](COC(=O  
OC[C@H](O[C@@H]1O[C@H](CO)[C@H  
OC[C@H]1O[C@@H](O[C@@H](COC(=O  
Oc1cc(cc2c1C(=O)c1c(C2=O)cccc1O)C(=O  
CC1=CC[C@@](CC1)(O)C(C)C  
O=C1CC[C@]2(C=C1)CC[C@@]1(C2CC  
CC([C@]12CC[C@@]([C@@H]2C1)(C)O  
Cc1ccc(c(c1)O)C(C)C  
COc1cc(ccc1O)c1cc(=O)c2c(o1)c(OC)c(c1



CSCBRJMLQJUDBK-HHYIAMCXSA-N  
WFMIUXMJJBBOGJ-UHFFFAOYSA-N  
SMYFGRWZEIQLPY-XSNSHTBXSA-N  
RQUJDLYPEZVGRG-TJSGNRIOWSA-N  
OCDWKDASQKOTIQ-ZSAROZDLA-N  
MFAONEQLPARJAO-UHFFFAOYSA-N  
UYEMGAFJOZZIFP-UHFFFAOYSA-M  
YXOLAZRVSSWPPT-UHFFFAOYSA-N  
RPESHUOYLLJEQJ-UHFFFAOYSA-N  
DJNCIOAUQVURTQ-UHFFFAOYSA-N  
CPBQNAKTS MCPNH-GZTJUZNOSA-N  
GMNAPBAUIVITMI-UHFFFAOYSA-N  
PNHDWCKYXTWGLA-UHFFFAOYSA-N  
ZMEIKTTXONUYNX-UHFFFAOYSA-N  
PCSWXVJAIHCTMO-UHFFFAOYSA-P  
VJDBDVUFFPRHSF-UHFFFAOYSA-N  
RAJWOBJTTGJROA-UHFFFAOYSA-N  
QGXBDMJGAMFCBF-UHFFFAOYSA-N  
CBMYJHIOYJESB-UHFFFAOYSA-N  
YEWFSUFMDJFFG-UHFFFAOYSA-N  
FMGSKLZLMKYGDP-UHFFFAOYSA-N  
VOXZDWNPVJITMN-UHFFFAOYSA-N  
MUMGGOZAMZWBJJ-UHFFFAOYSA-N  
VPQWBNWLSZYFHF-UHFFFAOYSA-N  
BKIMMITUMNQ MOS-UHFFFAOYSA-N  
QQKAHDMMPBQDAC-UHFFFAOYSA-N  
ZFMMSUAANRZJFM-UHFFFAOYSA-N  
AEMFNILZOJDQLW-UHFFFAOYSA-N  
POJWUDADGALRAB-UHFFFAOYSA-N  
OVSKIKFHRZPJSS-UHFFFAOYSA-N  
MMOXZBCLCQITDF-UHFFFAOYSA-N  
HVYWMOMLDIMFJA-UHFFFAOYSA-N  
UYEMGAFJOZZIFP-UHFFFAOYSA-N  
LQGN CUXDDPRDJH-XICIJMSXSA-N  
BJRNKVDFFDLYUGJ-RMPHRYRLSA-N  
CTNHZEZBBGIUJB-HRQAAHFGSA-N  
SPCSEMLFKVZFJN-CUCCWGAISA-N  
PADNECYMNL PKRN-JAGYOTNFSA-N  
PADNECYMNL PKRN-HAIONMGCSA-N  
CJGRGYBLAHPYOM-LNVOCJLCSA-N  
CJGRGYBLAHPYOM-HOLMNUNMSA-N  
UTIATVZKLZDAQF-FFHN CUASSA-N  
NAKQJOAAYRWURE-QKZSZZOLSA-N  
NAKQJOAAYRWURE-OAXOJBTLA-N  
CQLRU IIRZYHHS-LFXZADKFSA-N  
POQICXMTUPVZMX-UXYNSRGZSA-N  
RWBQKECPTANRKY-SIUDIOLQSA-N  
IILSBUXFTVZCJS-JTG VHUCZSA-N  
YHGVYECWZWIJC-TVZJSHMMSA-N  
PZZRDJXEMZMZFDBWYUNELBSA-N  
DJSISFGPUUYILV-ZFORQU DYSA-N  
SKKXALUAXPQBOM-FUCRAMRQSA-N  
PWSLQEGYLXOJNB-UOXIVHGRSA-N  
JPUKWEQWGBDDQB-DTGCRPNFSA-N  
AZDRQVAHHNSJOQ-UHFFFAOYSA-N  
RYGMFSIKBFXOCR-UHFFFAOYSA-N  
CWYNVVGGOAEACU-UHFFFAOYSA-N  
WAEMQWOKJMHJLA-UHFFFAOYSA-N

OC[C@H]1O[C@H]2O[C@]3(C)CC=C(C[  
CC(=O)O)c1cc(C)ccc1C(C)C  
NC(=O)N[C@ @H]1CC[C@]2(C(=C1)CCC  
NC(=O)N[C@ @H]1CC[C@]2(C(=C1)CCC  
OC[C@H]1O[C@ @H](O[C@ @H]2C[C@ (  
NC(=O)NC1=NC(=O)NC1=O  
[O-]c1cc(O)cc(c1)C(=O)O  
Oc1ccc(c(c1)O)c1oc2cc(O)cc(c2c(=O)c1C  
CC(CCC(C(C)C)OS(=O)(=O)O)O  
CC(CCCC(C1CCC2=C3C(CCC12C)C1(C;  
COc1cc(/C=C/C(=O)OC2CCC3(C(=CCC4  
CNC(C1C(O)CC2(C1(C)CCC13C2CCC2C  
CC(COC1OCC(C(C1OC(=O)C)OC(=O)C)  
OCC1OC(OC2C(O)COC(C2O)OC2C(OC  
Nc1cc(C)[n+](c2c1cccc2)CCCCCCCCC[  
OCC1OC(Oc2cc(O)cc3c2c(O)c(c3)C)C(  
O=C1CCC2(C(C1)CCC1C2CCC2(C1CCC  
OC1CCC2(C(C1)CCC1C2CCC2(C1CCC2  
OC1CCC2(C(C1)CCC1C2CCC2(C1CCC2  
O=C1CCC2(C(=C1)C=CC1C2CCC2(C1C  
OC1CCC2(C(=CCC3C2CCC2(C3CCC2=(  
Oc1ccc2c(c1)CCC1C2CCC2(C1CCC2O)(  
O=C1CCC2(C(=C1)CCC1C2CCC2(C1CC  
CC1CCCCCCCCCCCC(=O)C1  
CCCCCCCCC  
COc1cc2CCNC3c2c(c1OC)c1cccc1C3  
COc1ccc(cc1)CC=C  
O=C1CCC2(C(=C1)CCC1C2CCC2(C1CC  
NC(=O)NC1NC(=O)NC1=O  
OC(=O)COc1ccc(cc1Cl)Cl  
CCN(C(=O)c1cccc(c1)C)CC  
CC(CCCC(C1CCC2C1(C)CCC1C2CC=C;  
Oc1cc(O)cc(c1)C(=O)O  
CC(CC[C@H]([C@ @]([C@H]1CC[C@ @];  
OC[C@H]1O[C@ @H](Oc2ccc(cc2)O)[C@  
OC[C@ @]12[C@ @H](O)CC(C[C@H]2C2  
OC[C@ @]12[C@ @H](O)CC(C[C@H]2C2  
OC[C@]12[C@H](O)C[C@ @]3(C=CC[C(  
OC[C@]12[C@H](O)C[C@ @]3(C=CC[C(  
OC[C@H]1O[C@ @H](OC(=O)/C=C/c2ccc  
OC[C@H]1O[C@ @H](OC(=O)/C=C/c2ccc  
O=C(/C=C/c1cccc1)OC[C@H]1O[C@ @]1  
OCCC(=C)C(=O)OC[C@H]1O[C@ @H](O  
OCCC(=C)C(=O)OC[C@H]1O[C@ @H](O  
OC[C@H]1O[C@ @H](Oc2c(oc3c(c2=O)c  
OC[C@ @H]1O[C@H]([C@ @H]([C@H]1C  
CC(CCC(=O)[C@ @]([C@H]1CC[C@ @]2;  
O[C@H]1C[C@ @]2(C)C(C[C@H]1O)C(=  
OC[C@ @]12CCC(C[C@H]2C2=CC[C@H  
Oc1cc(O)c2c(c1)oc(c2=O)O[C@ @H]1O  
OC(=O)[C@H]1O[C@ @H](Oc2cc3oc(cc(=  
O[C@H]1[C@ @H](O[C@H]([C@ @H]([C@  
O[C@H]1[C@ @H](O[C@H]([C@ @H]([C@  
OC[C@H]1O[C@ @H](Oc2c(oc3c(c2=O)c  
[AlH3]  
[Cu]  
[Fe+2]  
[Mn+2]

BLRPTPMANUNPDV-UHFFFAOYSA-N  
PWYYWQHXPXYMF-UHFFFAOYSA-N  
PTFCDOFLOPIGGS-UHFFFAOYSA-N  
IIDJRNMFWDHID-UHFFFAOYSA-N  
ONCBFIXZBSEBNG-YQCHCMBFSA-N  
JLVVXSFLKOJNIIY-UHFFFAOYSA-N  
BVKZGUZCCUSVTD-UHFFFAOYSA-N  
XEEYBQQBJWHFJM-UHFFFAOYSA-N  
PWHULOQIROXLJO-UHFFFAOYSA-N  
HCHKCACWOHOZIP-UHFFFAOYSA-N  
REDXJYDRNCIFBQ-UHFFFAOYSA-N  
DFYRUELUNQRZTB-UHFFFAOYSA-N  
IYGYMKDQCDDOMRE-ROUUACIISA-N  
QUOZWMJFTQUXON-UXXRCYHCSA-N  
KSENPDOZJGRJHR-GPWVBDWSA-N  
GOWXUGYRPHOTEQ-QYNXQQORSA-N  
RJWJHRPNHPHBRN-FKVJWERZSA-N  
VFCGRXCCUHELLIP-UHFFFAOYSA-N  
YBHILYKTIRIUTE-UHFFFAOYSA-N  
CBTFERBMQAROP-BZNQNGANSA-N  
LHDWRKICQLTVDL-PZYDOOQISA-N  
YYFOFDHQVIODOQ-UHFFFAOYSA-O  
XYHOBCMEDLZUMP-UHFFFAOYSA-N  
FELOSQQXIHRUSH-UHFFFAOYSA-N  
BMCZTYDZHNTKPR-INIZCTEOSA-N  
XPOJSWHIKCNLEQ-UHFFFAOYSA-N  
NJJDSCKXYWRUOY-HUYWQKACSA-N  
PVOOFKAEZIVTOE-HWVFMACMSA-N  
FNUPUYFWZXZMIE-LSDHHAIUSA-N  
FNUPUYFWZXZMIE-CABCVRRESA-N  
CXQWRCVTCMQVQX-LSDHHAIUSA-N  
YQUVCSBJEUQKSH-UHFFFAOYSA-N  
PQQITYGQJLPDFC-RKQHYHRCSA-N  
FPJQGFLUORYYPE-UHFFFAOYSA-N  
KSEBMYQBYZTDHS-HWKANZROSA-N  
LVNFIOGAAUPIPC-BJGSYIF TSA-N  
XHEFDIBZLJXQHF-UHFFFAOYSA-N  
VKUXVDUAEAQCSK-MJLPRLLOSA-N  
FUZMQNZACIFDBL-KYJUHHDHSA-N  
OSSHOTLYZGBYFR-IVMMKFTPSA-N  
KWVNDXWEYANTFF-AAOUOOLPSA-N  
NHKDEMRRYWOJOF-UHFFFAOYSA-N  
OCPXLBDSVHVVEA-QSKFOJEASA-N  
MXTLAHSTUOXGQF-UHFFFAOYSA-O  
JANLDILJLTVDB-YHZAWZKLSA-N  
GAYKAIAESJROGN-SAOYRWCP SA-N  
KBDSLGBFQAGHBE-FGPVBJILSA-N  
FBPFZTCFMRRESA-UHFFFAOYSA-N  
LRHHPZILMPIMIY-GGKKSNTISA-N  
QKKAHDMMPBQDAC-CQSZACIVSA-N  
KBDSLGBFQAGHBE-ICSMZNQQSA-N  
IAFYZOROUWCFHK-RZWNPTOTSA-N  
QUCQEUCGKKTEBI-UHFFFAOYSA-N  
RTZZUFQGHDIARKI-HWLNPNCHJSA-N  
PPTUZELFQUKUGJ-NQLBIMQHSA-N  
GOZCEKPKCKLNO-RKQHYHRCSA-N  
SCIGYBYAZUFDLA-KRQBOUTOSA-N  
AKNILCMFRRDTEY-NUGKWEESA-N

[SiH4]  
[Sr+2]  
[Zn+2]  
OP(=O)(C(P(=O)(O)O)(Cc1cccnc1)O)O  
COC(=O)C1=C(O)c2c3=C1C1=[NH+]/C(=  
[Mg+2]  
OC(=O)O  
[Fe]  
[Mn]  
[Zn]  
[AlH3+3]  
COc1cc(ccc1O)C(=O)C  
CN1CCc2c([C@H]1[C@H]1OC(=O)c3c1c  
OC[C@H]1O[C@@H](Oc2ccc(cc2OC)C(=  
OC[C@H]1O[C@@H](O[C@H]2C[C@H]3  
OC[C@H]1O[C@@H](O[C@H]2C[C@H]3  
OCC1=C[C@H]([C@H]2[C@H]1[C@@H]  
COc1c(OC)ccc2c1c[n+]  
COc1c(OC)ccc2c1c[n+]  
OC[C@H]1O[C@@H](Oc2ccc(c2)C(=O)  
OC[C@H]1O[C@@H](OC2OC=C[C@@H]  
COc1cc2CC[n+]  
C1Oc2c(O)cc1c(c2)CC[n+]  
COc1cc2CCN(Cc2cc1O)C  
COc1c(OC)ccc2c1CN1CCc3c([C@@H]1C  
COc1cc2C(=O)Cc3ccc4c(c3CN(CC2cc1O  
COC(=O)[C@H]1O[C@@H](O[C@H]2CC  
OC[C@H]1O[C@@H](OCC23CCC(CC3C  
Oc1ccc2c(c1)O[C@@H]([C@H](C2=O)O)  
Oc1ccc2c(c1)O[C@@H]([C@H](C2=O)O)  
Oc1cc2O[C@H](c3ccc(c3)O)O[C@H](C  
OC(=O)c1ccc(c1)O)O  
OC[C@H]1O[C@@H](OCCc2ccc(c2)O)  
COc1cc2c(cc1OC)CC[n+]  
COc1cc(/C=C/C(=O)O)ccc1O  
COc1cc(/C=C/C(=O)OC[C@H]2O[C@@H]  
Oc1ccc2c(c1)oc(c2=O)O)c1ccc(c1)O)  
OC[C@H]1O[C@@H](OCCc2ccc(c2)O)  
COc1ccc2cc1Oc1ccc(cc1)C[C@@H]1N(C  
CC(=O)OC[C@H]1O[C@@H](OC2OC=C  
COc1cc(ccc1OC(=O)C)C(=O)O[C@H]1[C  
CCCCCCCCCCCCCCCCCCCCCCCCCCCC  
OC[C@H]1O[C@@H](OCCc2ccc(c2)O)  
COc1cc2c(cc1O)CC[n+]  
OC[C@H]1O[C@@H](OC2OC=C[C@@H]  
OC[C@H]1[C@H](CO[C@@H]1c1ccc(c1  
O=C1OC[C@]23[C@H](C1)OC([C@@H]  
OCC(C(C(C(CO)O)O)O)O  
OC[C@H]1O[C@@H](OC2OC=C[C@@H]  
COc1cc2CCN[C@H]3c2c(c1OC)c1cccc1  
O=C1OC[C@]23[C@H](C1)OC(C2CC(=C  
COc1cc2c(cc1OC)CCN([C@H]2Cc1ccc(c  
COc1cc2CC[n+]  
O=C(OC[C@H]1O[C@@H](OC2OC=C[C@  
O[C@H]1C[C@H]2C(=CCC3[C@@H]2(C)  
OC[C@H]1O[C@@H](Oc2ccc(cc2)C(=O)  
OC[C@H]1O[C@@H](OC2OC=C[C@@H]  
OC[C@H]1O[C@@H](OC2OC=C[C@@H

RMSKZOXJAHOIER-GGKKSNTISA-N  
HGXBURUKMWQGOIE-AFHBHXEDSA-N  
RMJMFPNPBUGUMP-NGESMGFYSA-N  
DTHUVZQMVMVXNB-LVSIQRNOSA-N  
IKRQGQZHSYUJJ-DWFIKQFRSA-N  
CBZYUWVGJNYOKHT-ZKDZFUIGSA-N  
MTKGYCQUEWGDQW-CRVIUCGDSA-N  
LHUSSIFBNCANU-HSVUOORVSA-N  
INVGWHRKADIJHF-UHFFFAOYSA-N  
WAABIQNSMBCVLC-FSORARIGSA-N  
FKUWQWJFTAWUKB-KOIGGHRSSA-N  
YWNUNVSMOKMJMG-LJAQVGFWSA-N  
XEZKWLHAYOYCL-AWEZLNQCLSA-N  
GOQUMRHFJDDYAU-UHFFFAOYSA-N  
KMLPLPOAFAPFFE-HNNXBMFYSA-N  
JUQBPFIFICIIN-UHFFFAOYSA-N  
JTZZGWPIBBTYNE-MPBGBICISA-N  
UYNHKOIUEXICNQ-VMPREFPWSA-N  
JFOOZQIJNIJCOW-UHFFFAOYSA-N  
FLBHM RBWGPQKJ-UHFFFAOYSA-N  
VZJHQCZRC SACOX-KVBCGVIQSA-N  
GOHHRVCULPSXEU-OCHMABM RSA-N  
DKHAWRPWAKXFNA-MGSHXDRLSA-N  
XKNZOUHAGXCOCD-MWICNAQESA-N  
GPDFNJMVWGKNEM-DPRYFANMSA-N  
NODYDDIWONUPOD-CTOQLXJKSA-N  
NKHJLZUONNNHMMW-OWLKOJIMSA-N  
BCLYFWVPMVZSTR-DYDLCFMWSA-N  
JVTZFYHCGSXJV-UHFFFAOYSA-N  
CWVRJTMFETXNAD-DUXPYHPUSA-N  
WHUAIEAFPHHTPO-UHFFFAOYSA-N  
GUIYORVNNIUEBH-VQHVLOKHSA-N  
XGEAUXVPBXUBKN-UHFFFAOYSA-N  
KFBCTNNQFGONHB-UHFFFAOYSA-N  
KFXPBEXNBSFIQ-UHFFFAOYSA-N  
YLRXAIKMLINXQY-UHFFFAOYSA-O  
MAYJEFRPIKEYBL-UHFFFAOYSA-N  
KNFSIJCTWSWAOV-UHFFFAOYSA-N  
GLYPKDKODVRYGP-UHFFFAOYSA-O  
NKMJZJDVLM DPGO-UHFFFAOYSA-N  
MQKFSXLBP CAGR-UHFFFAOYSA-N  
PGIOBGCIEGZHJH-UHFFFAOYSA-O  
KBD SLGBFQAGHBE-UHFFFAOYSA-N  
VSOJKDUWYQCWFM-UHFFFAOYSA-N  
RBBVPNQTBKH OEQ-UHFFFAOYSA-O  
WDKYDMULARN CIS-GQCTYLIASA-N  
VZTUIEROBZXUFA-UHFFFAOYSA-N  
ZHYQCBCBTQWPLC-UHFFFAOYSA-N  
JRIBPWOXWIRQOQ-WZUFQYTHSA-N  
QBILRDAMJUPXCX-UHFFFAOYSA-N  
ODJLBQGVINUMMR-UHFFFAOYSA-N  
VHFXPBHLQOPQHJ-UHFFFAOYSA-N  
DJTVMANCSQLMCX-UHFFFAOYSA-N  
LOCASNZLOPRAJY-GQCTYLIASA-N  
UPUXGPPBEIXAGT-GQCTYLIASA-N  
PQQITYGQJLPDFC-UHFFFAOYSA-N  
CBTFERBMQAROP-UHFFFAOYSA-N  
JRIBPWOXWIRQOQ-VZUCSPMQSA-N

OC[C@H]1O[C@@H](OC2OC=C[C@@H]COC1cc(ccc1O)[C@H]1OC[C@H]2[C@@OCC[C@H]1c2cocc2[C@@H]([C@@H]1OC(=O)C[C@H]1c2cocc2[C@@H]([C@COC(=O)C[C@@H]1[C@@H](O)[C@H](OC[C@H]1O[C@@H](O[C@H]2[C@H]OC[C@H]1O[C@@H](O[C@H]2[C@H]OCOC(=O)[C@@]1(O)C=C(C2=CC(=O)C3C[n+ ]1cc2c3OCOC3ccc2c2c1c1cc3OCOC[C@H]1O[C@@H](O[C@H]2[C@H]OC[C@H]1O[C@@H](OCCc2ccc(c(c2)O)COC1ccc2cc1Oc1ccc(cc1)CC1=NCCc3c1COc1cc2c(cc1OC)C[C@H]1c3c2c2OCOCOC1cc2c(cc1OC)C(=O)c1c3c2c2OCOC2COc1cc2c(cc1OC)C[C@H]1c3c2c(OC)c(cCOc1c(O)ccc2c1CN(C)CCc1c(C(=O)C2)cCOc1cc2c(cc1OC)CCN1[C@@H]2[C@H]COc1c(OC)c2Oc3cc4c(cc3OC)CCN([C@COc1ccc2cc1Oc1ccc(cc1)CC1NCCc3c1cOC(=O)CCc1ccc(c(c1O)O)OOC[C@]12O[C@H]2[C@H]([C@H]2[C@OC[C@H]1O[C@@H](O[C@H]2OC=CC3OC/C=C/c1cc2c(c(c1)OC)O[C@H]([C@OC[C@H]1O[C@@H](OC/C=C/c2cc(O)cOC[C@H]1O[C@@H](OC/C=C/c2cc(OC(OCCC(=C)C(=O)OC[C@H]1O[C@@H](OCCC(=C)C(=O)OC[C@H]1O[C@@H](OCCC(=C)C(=O)OC[C@H]1O[C@@H](OO=Cc1ccc(c(c1)O)OCOC(=O)C12OC2(CC=C(C)C)C(=O)c2c(COC1ccc2c(c1O)c1c(O)c(OC)cc3c1C(C2)O=C1C=CC2(C(C(O1)(C)C)CC(=O)C1(C2OC1CCC2(C(C1)CC(C1C2CC(O)C2(C1COc1ccc2c(c1O)c[n+ ]1c(c2)c2cc3OCOC3Oc1ccc(c2c1oc(CCc1cccc1)cc2=O)O)COC1cc2C(=O)NCCc2cc1OCOC1cc2c(cc1O)CC[n+ ]1c2cc2ccc3c(c2cO=C1OCC23C(C1)OC(C2CC(=O)C1(C3CO=C1NCCc2c1cc1OCOC1c2COc1cc2C[N+ ]3(C)CCc4c(C3Cc2cc1O)ccCCOC(=O)/C=C/c1ccc(c(c1)O)OOCOC1c(OC)ccc2c1CN1CCc3c(C1C2)cc1cCOc1c(OC)ccc2c1c(=O)n1c(c2)c2cc3OC(C/C=C/C(=O)OC(C1Oc2c(C1)c1oc(=O)CO=C12CCC(CC2(O)CCC2C1CCC1(C2(O)O=CC12CCC(CC2(O)CCC2C1CCC1(C2(O)O=C1OC2C(C1=C)CCC(C1C2C(C)(O)CCOCc1cc(O)c2c(c1)C(c1c(C2=O)c(O)ccc1)OCC1OC(OC2OC=CC3C2C(C)(O)CC3OCOC1cc/C=C/C(=O)OC2CC(C3C2C=CO)OCC1OC(OCCc2ccc(c(c2)O)O)C(C(C1O)OCC1OC(Oc2ccc(c(c2)C(=O)O)O)C(C(C1C/C=C/C(=O)OC(C1Oc2c(C1)c1oc(=O)cc

NMVUNDOHFYILSF-UHFFFAOYSA-N  
UHPMCKVQTMMPG-UHFFFAOYSA-N  
LCXREBMNASQAOC-UHFFFAOYSA-N  
BEAROWPOUPFNRD-UHFFFAOYSA-N  
VTMFDSJJVNQXLT-HWKANZROSA-N  
PGIOBGCIEGZHJH-UHFFFAOYSA-O  
CPYDMLXRLHYXS-V-GQCTYLIASA-N  
QBUIDYLGKMWNEA-UHFFFAOYSA-O  
USDOQCCMRDNVAH-UHFFFAOYSA-N  
WWRCMNKATXZARA-UHFFFAOYSA-N  
DUNCVNHORHNONW-UHFFFAOYSA-N  
DJCOYPJXFKNBCF-UHFFFAOYSA-N  
OHDQLTAYHMLRBA-UHFFFAOYSA-N  
HFDVRLIODXPAHB-UHFFFAOYSA-N  
YESPQCLKTIRGLU-UHFFFAOYSA-N  
SMERZMDSMLIVHC-UHFFFAOYSA-N  
HYWIKTJORZAXSP-UHFFFAOYSA-O  
OGFXBIXJCAUCH-UHFFFAOYSA-N  
XQINTCORIZHGFD-UHFFFAOYSA-O  
BDRRAMWDUCXAKG-UHFFFAOYSA-N  
JZUTXVTYJDCMDU-UHFFFAOYSA-N  
IZTUINVRJSCOIR-UHFFFAOYSA-N  
MHXCIKXNYCMHY-UHFFFAOYSA-N  
WPQJUYMGNBENF-UHFFFAOYSA-N  
OEYIOHPDSNJKLS-UHFFFAOYSA-N  
OEGWOBMNQDATKP-UHFFFAOYSA-O  
UAHWPYUMFXFYJY-UHFFFAOYSA-N  
RRAFCDWBNXTKKO-UHFFFAOYSA-N  
VJOBNGRIBLNUKN-UHFFFAOYSA-N  
HVTCKKMWZDDWOY-UHFFFAOYSA-O  
VNGXAACSTLPKAN-UHFFFAOYSA-N  
WUOACPNHFRMFPN-UHFFFAOYSA-N  
BNXZOIDSUKXGW-UHFFFAOYSA-O  
ALZAZMCIBRHMFF-UHFFFAOYSA-N  
YOVSPTNQHMDJAG-UHFFFAOYSA-N  
UCAFJBSQKXVPDX-UHFFFAOYSA-N  
JGUZGNYPMHYRK-UHFFFAOYSA-N  
XLTFNNCXVBYBSX-UHFFFAOYSA-N  
CWKBTNZNPCPAPB-UHFFFAOYSA-N  
AEQDJSLRWYMAQI-UHFFFAOYSA-N  
OZQAPQSEYFAMCY-UHFFFAOYSA-N  
FRMCCTDTYSRUBE-UHFFFAOYSA-N  
KZJWDPNRJALLNS-UHFFFAOYSA-N  
CLFBXKHKECKSQM-UHFFFAOYSA-N  
QYVZEPLDLPYECM-XUTLUUPISA-N  
HGXBKUMWQGOIE-UHFFFAOYSA-N  
HFPZCAJZSCWRBC-UHFFFAOYSA-N  
FLIACVVOZYBSBS-UHFFFAOYSA-N  
WKOLLVMJNQIZCI-UHFFFAOYSA-N  
RAGZUCNPTLULOL-HWKANZROSA-N  
WGSMVBQMRKGVJX-UHFFFAOYSA-O  
NZZNHGSHLAHPCG-VYUBKLCTSA-N  
ZGVGUTOTMNVHSX-VYUBKLCTSA-N  
FXNFHKRTJBSTCS-UHFFFAOYSA-N  
IPQKDIRUZHOIOM-IAAKTDFRSA-N  
IKIIZLYTISPENI-ZFORQUDYSA-N  
SGNBVLWSZMBQTH-ZRUUVFCLSA-N  
RTIXKCRFFJGDFG-UHFFFAOYSA-N

CC1CC(O)(CC(C1O)O)C(=O)O  
COC1=CC(=O)c2c(C1=O)c(O)c(c(c2O)C)C  
Cc1c2cc3OCOc3cc2c[n+]  
2c1c1cc3OCOc  
O=C1OCC23C(C1)OC(C2CC(=O)C1(C3C  
COc1cc(/C=C/C(=O)OC2C(O)CC(CC2O))  
COC1=CC2=C3C=c4ccc5c(c4=C[NH+]  
3C  
COC(=O)C1(O)CC(OC(=O)/C=C/c2ccc(c  
COc1cc2CC[n+]  
3c(c2cc1OC)cc1c(c3)c(O)  
CC1=CCC2C(C1)C(CC=C2C)C(C)C  
CC(c1cccc1C)C  
C=CC(=C)CCCC(O)(C)C  
COc1c(OC)ccc2c1C(=O)N1C2(O)C(=O)c2  
COc1ccc2c(c1O)c1c(OC)c(OC)cc3c1C(C  
CCCCCCCCCCCCC=C  
Cc1c2[n+](CCc3c2cc2OCOc2c3)cc2c1cc  
COc1c(OC)ccc2c1c[n+]  
1CCc3c(c1c2C)cc  
COc1cc2CC[N+]  
3(C(c2c(c1OC)O)Cc1c(C  
OCC1Cc2cc(OC)c(cc2C(C1CO)c1ccc(c  
COc1ccc2c(c1O)c1c(OC)c(OC)cc3c1C(C  
COc1cc(ccc1O)C(O)C  
COc1c(OC)ccc2c1C(=O)OC2C1N(C)CCc  
c1ccc(cc1)Cc1nccc2c1cccc2  
OCC1C(COC1c1ccc(c(c1)OC)O)Cc1ccc(c  
COc1c(OC)ccc2c1c[n+]  
1CCc3c(c1c2[O-])  
OCC[N+](C)(C)C  
COc1c(O)ccc2c1c[n+]  
1CCc3c(c1c2)cc1c  
C=CC(=C)CCC=C(C)C  
C=CCc1ccc(c(c1)OC)O  
COc1cc(ccc1O)C1OCC2C1COC2c1cc(O  
COc1c(OC)ccc2c1c[n+]  
1CCc3c(c1c2)cc(c  
COc1cc2cc(n3c2c(c1)c1cc2OCOc2cc1c3  
CC1=CCC(CC1)C(O)(C)C  
COc1cc2CC[n+]  
3c(c2cc1O)cc1c(c3)c2OC  
COc1c(OC)ccc2c1CN(C)c1c2ccc2c1cc1C  
C=C1CCCC2(C1CC(CC2)C(=C)C)C  
O=c1c2c(ccc3c2OCO3)cc2n1CCc1c2cc2  
COc1cc(O)c2c(c1)oc(c(c2=O)O)c1ccc(c  
COc1c(O)cc(c2c1oc(cc2=O)c1cccc1)O  
COc1ccc2c(c1O)c(=O)n1c(c2)c2cc3OCO  
COc1cc2CCN3C(c2cc1OC)Cc1c(C3)c(OC  
CC1=CCCC2(C1CC(CC2)C(=C)C)C  
C=C1CCC2C(C3C1CCC3(C)O)C2(C)C  
CCC(C(C)C)CCC(C1CCC2C1(C)CCC1C2  
COc1cc2CC[n+]  
3c(c2cc1OC)cc1c(c3)cc(c  
CCCCCCCCCCCCCCCCCCCCOC(=O)/C=C  
COc1cc(ccc1O)C1OCC2C1COC2c1ccc(c  
Cc1ccc(cc1)C(C)C  
CCCCCCCCCCCCCCCC(=O)OC  
COc1cc(ccc1O)C(=O)O  
COc1cc(/C=C/C(=O)OC2CC(O)(CC(C2O)  
COc1cc2CC[n+]  
3c(c2cc1O)c(C)c1c(c3)c2  
OC[C@H]1O[C@H]([C@@H]([C@H]([C@H]  
OC[C@H]1O[C@H]([C@@H]([C@H]([C@H]  
OC1cc2oc(cc(=O)c2c(c1O)O)c1cccc1  
OC[C@H]1O[C@@H](Oc2cc3oc(cc(=O)c  
OC(=O)[C@H]1O[C@@H](Oc2cc3oc(cc(=O)  
O[C@H]1CC[C@]2(C=CC[C@]3[C@]  
OC1cc(O)c2c(c1)oc(cc2=O)c1cccc1

QUAPPCXFYKSDSV-LBPRGKRZSA-N  
RXSYNUMMIWLLC-UHFFFAOYSA-N  
ZQSIKQQCMJOPGE-PUIBNRJISA-N  
RYJWOWHMBGOYAT-ZQUMRXHJSA-N  
DSNICWRJCXGVEE-UHFFFAOYSA-N  
QCKBVAGWPBRRQJ-UHFFFAOYSA-N  
SBHXYTNGIZCORC-ZDUSSCGKSA-N  
BEIRZEADQYKQFA-NRFANRHFSA-N  
IPCSVZSSVZVIGE-UHFFFAOYSA-N  
IHFBPDAQLQOCBX-UHFFFAOYSA-N  
IHLSBQVBFDNTC-UHFFFAOYSA-N  
NZOUUYOSKJFMKB-UHFFFAOYSA-N  
VDWSYBFEQXWINA-GFKCUEKNSA-N  
OEZZJTAJYYSQKM-UHFFFAOYSA-N  
OVMFOVNOXASTPA-VYUBKLCTSA-N  
NXHQVROAKYDSNW-UHFFFAOYSA-N  
ZTHLHHDJRJGRX-UHFFFAOYSA-N  
DGLBFMRIIDZOJI-QKYBYQKWSA-N  
ZFKKRRMUPBBYRS-UHFFFAOYSA-N  
XXKJOVIWVWZSF-NRFANRHFSA-N  
LKOJGSWUMISDOF-UHFFFAOYSA-N  
QXIPXNZUEQYPLZ-QSUZLTMSA-N  
NBQYBZYBTNQEQQ-LSDHHAIUSA-N  
NULZZCUABWZIRV-UHFFFAOYSA-N  
CVBUKMMRLOKQR-UHFFFAOYSA-N  
BWHOZHOGCMHOBV-BQYQJAHWSA-N  
SAJHRQBGZMZGMA-UHFFFAOYSA-N  
KOBUGDLTCAJTND-DOARKGTESA-N  
DJSISFGPUUYILV-ZFORQUDYSA-N  
XCBMYKIKEHGYAR-UHFFFAOYSA-N  
KZJWDPNRJALLNS-VJSFXFLFSA-N  
CZRGNFVQUYWGKP-UHFFFAOYSA-N  
GMQFOKBGMKVUQZ-UHFFFAOYSA-N  
HCXVJBMSMIARIN-WACSKALWSA-N  
CZMRCDWAGMRECN-UGDNZRGBSA-N  
CPFJPTACQDZPLS-UHFFFAOYSA-N  
BJNCWLSOQIVKIX-LSDHHAIUSA-N  
XVXXIRQXOYAJAF-ZDUSSCGKSA-N  
YQTWPPLBGYVRIV-SFTVRKLSSA-N  
ODNWHTWVHZTPB-CGXGPNJMMSA-N  
STAGATUVRDVEAT-UHFFFAOYSA-N  
WJXXUIYFPVIHDH-UHFFFAOYSA-N  
LHEFNLQSEVZHOI-ZFORQUDYSA-N  
XFUBPGKNMBCAHX-AATRIKPKSA-N  
JWTUCPCQIJFEBS-YXJFMNLASA-N  
GWRFNPNJGKCUUSJ-UHFFFAOYSA-N  
OBPTWCJIAIXDRP-UHFFFAOYSA-N  
BYGRZBWUKYXRHL-UHFFFAOYSA-N  
OFYPDAKTVZXXPC-UHFFFAOYSA-N  
AZRVQJNRDWOJQR-QNDFHXLGSA-N  
MMDUKUSNQNWVET-VYUBKLCTSA-N  
HVULMIKUBSLJMI-BQYQJAHWSA-N  
FCXRFTLSXMRXTM-LBPRGKRZSA-N  
LUSOAMBDAKTEBX-AWEZLNQCLSA-N  
VHNWVABJHPRFGC-UHFFFAOYSA-N  
NKSITEVSJGHWCO-UHFFFAOYSA-N  
OHRJVTFNYFYUPW-DRASZATQSA-N  
ZREMOZUHVILNPD-DRASZATQSA-N

COc1c(O)cc2c(c1O)C(=O)C[C@H](O2)c1  
COc1c(O)c2oc(cc(=O)c2c(c1OC)O)c1cccc  
OC[C@H]1O[C@@H](Oc2cc(O)c3c(c2OC  
COc1cc(O)[C@@H]2O[C@H](C(=O)O)[C@  
COc1c(OC)cccc1c1cc(=O)c2c(o1)c(OC)c  
COc1c(OC)c(OC)c(c2c1oc(cc2=O)c1cccc  
Oc1cc2O[C@@H](CC(=O)c2c(c1)O)c1cc  
Oc1cc(O)c2c(c1)oc(cc2=O)c1c(O)ccc(c1c  
CCCCCCCCCCCCCCCC(=O)O  
COc1c(O)cc2c(c1O)c(=O)cc(o2)c1ccc(cc1  
COc1c(OC)cc(c2c1oc(cc2=O)c1cccc1)O  
COc1c(O)cc(c2c1oc(cc2=O)c1cccc1)OC  
OC[C@H]1O[C@@H](OCc2ccc(c(c2)O)  
COc1c(O)cc(c2c1oc(cc2=O)c1ccc(cc1)O)  
OC[C@H]1O[C@H]([C@@H]([C@H]([C@  
Oc1ccc(cc1)c1cc(=O)c2c(o1)c(O)c(cc2O)  
COc1cc2oc(cc(=O)c2c(c1O)O)c1cccc1  
OC[C@H]1O[C@@H](Oc2ccc(c3c2c(=O)  
Oc1cc(O)c2c(c1O)oc(cc2=O)c1cccc1  
Oc1ccc(c(c1)[C@@H]1CC(=O)c2c(O1)cc  
COc1c(O)cc2c(c1O)c(=O)cc(o2)c1cccc1  
COc1c(O)[C@@H]2O[C@H](C(=O)O)[C@  
Oc1cc2O[C@H](c3c(O)cccc3O)[C@H](C  
Oc1cc(O)c2c(c1)oc(c(c2=O)O)c1c(O)cccc  
O=C(c1cccc1)CC(=O)C  
CC(=O)/C=C/c1cccc1  
COc1cc2OC(CC(=O)c2c(c1)O)c1c(O)cccc  
OC[C@H]1O[C@@H](Oc2cccc(c2[C@@  
OC(=O)[C@H]1O[C@@H](Oc2cc3oc(cc=  
COc1c(O)cc(c2c1oc(cc2=O)c1cccc1)O  
CC[C@@H](C(C)C)CC[C@H]([C@H]1CC  
COc1cc(O)c2c(c1OC)oc(cc2=O)c1cccc1  
COc1cccc(c1c1cc(=O)c2c(o1)c(OC)c(c2  
CC[C@H](C(C)C)/C=C/C([C@H]1CCC2[C  
OC[C@H]1O[C@@H]([C@H]([C@@H]1O)  
COc1c(O)ccc(c1c1cc(=O)c2c(o1)c(OC)c(c  
Oc1cc2O[C@H](c3cccc3O)[C@H](C(=O  
Oc1ccc(c(c1)[C@@H]1CC(=O)c2c(O1)cc  
OC[C@H]1O[C@@H](Oc2cc3O[C@@H]  
OC(=O)[C@H]1O[C@@H](Oc2cc3O[C@  
Oc1cc(O)c2c(c1)oc(cc2=O)c1cccc(c1O)O  
Oc1cc(O)c2c(c1)oc(cc2=O)c1c(O)cccc1O  
OC(=O)[C@H]1O[C@@H](Oc2cc(O)c3c(c  
COc1cc(O)cc(c1C(=O)/C=C/c1c(O)cccc1  
COc1c(OC)c(OC)c2c(c1O)[C@@H]1O[C@  
COc1cc(O)c2c(c1OC)oc(cc2=O)c1c(O)ccc  
COc1cccc(c1c1cc(=O)c2c(o1)c(OC)c(cc2  
COc1c(O)c2oc(cc(=O)c2c(c1OC)O)c1cccc  
Oc1cc(O)c2c(c1)oc(cc2=O)c1cccc1O  
OC[C@H]1O[C@@H](Oc2cccc2c2cc(=C  
OC[C@H]1O[C@H]([C@@H]([C@H]([C@  
COc1cc(O)ccc1C(=O)/C=C/c1c(O)cccc1O  
COc1c(O)cc2c(c1O)C(=O)C[C@H](O2)c1  
COc1cc(O)cc2c1C(=O)C[C@H](O2)c1c(C  
COc1c(O)cc2c(c1O)c(=O)cc(o2)c1cccc1  
COc1cc(O)c2c(c1O)oc(cc2=O)c1cccc1O  
OC[C@H]1O[C@@H](Oc2cccc2c2cc(=C  
OC[C@H]1O[C@@H](Oc2cc(O)c3c(c2OC

PVSHCMCDBFRZFY-UHFFFAOYSA-N  
KBQNEFOZLNJBRZ-RBLJWTLISA-N  
YGPCNVVYCWOUPL-AJRKLXPLSA-N  
KCQRDVPUUNCDDW-ARSJFUCGSA-N  
DIRSNBJJSCNRKL-DRASZATQSA-N  
LNOHXHDWGCMVCO-NTKSAMNMSA-N  
WEEGYLXZBRQIMU-UHFFFAOYSA-N  
WRMNZCZEMHIOCP-UHFFFAOYSA-N  
DANYIYRPLHHOCZ-UHFFFAOYSA-N  
XLTFNNCXVBYBSX-UHFFFAOYSA-N  
LNOHXHDWGCMVCO-UHFFFAOYSA-N  
DTGKSKDOIYIVQL-UHFFFAOYSA-N  
CDOSHBSSFJOMGT-UHFFFAOYSA-N  
WPYMKLBDIGXBTP-UHFFFAOYSA-N  
QQQCWVDPMPFUGF-UHFFFAOYSA-N  
FAMPSKZZVDUYOS-KXWHQPPKSA-N  
RRAFCDWBNXTKKO-UHFFFAOYSA-N  
CSKINCSXMLCMAR-UHFFFAOYSA-N  
JVXZRQGGOGOXCEC-UHFFFAOYSA-N  
XGJUUNRZFPFMOK-UHFFFAOYSA-N  
XFUBPGKNMBCAHX-WAYWQWQTSA-N  
UVNUGBQJLDGZKE-UHFFFAOYSA-N  
GPDJGLOROGNHJD-UHFFFAOYSA-N  
SBHXYTNGIZCORC-UHFFFAOYSA-N  
QCDYOIZVELGOLZ-UHFFFAOYSA-N  
LYWHJXVFIUKXLE-UHFFFAOYSA-N  
ADIDQIZBYUABQK-UHFFFAOYSA-N  
MMRYSDPTALIPSP-UHFFFAOYSA-N  
PPUFZEKAOXNVLU-UHFFFAOYSA-N  
ZLPXZRZUFKQINJ-UHFFFAOYSA-N  
XWBJWURSGCGEQR-UHFFFAOYSA-N  
GSTISHLARMKZOD-UHFFFAOYSA-N  
ILRCGYURZSFMEG-UHFFFAOYSA-N  
YCCILVSKPBXVIP-UHFFFAOYSA-N  
DJSISFGPUUYILV-UHFFFAOYSA-N  
MIWLOORHWQBHP-UHFFFAOYSA-N  
DCWXTOWSMXDTNR-UHFFFAOYSA-N  
NPJICTMALKLTFW-UHFFFAOYSA-N  
KZJWDPNRJALLNS-UHFFFAOYSA-N  
KOWMJRJXZMEZLD-UHFFFAOYSA-N  
CPTCHGRDJMOIJZ-UHFFFAOYSA-N  
IRAQOCYXUMOFWCW-UHFFFAOYSA-N  
KMOUJOKENFFTPU-UHFFFAOYSA-N  
VSMOENVRABVKN-UHFFFAOYSA-N  
NFLGAXVYCFJBMK-UHFFFAOYSA-N  
KZNIFHPLKGYRTM-UHFFFAOYSA-N  
GAIBLDCXCZKKJE-BZXLUOIMSA-N  
CZMRCDWAGMRECN-UHFFFAOYSA-N  
ZNWNWEHQFXOPGK-UHFFFAOYSA-N  
NBQYBZYBTNQEQQ-UHFFFAOYSA-N  
PVFGJHYLIHMCQD-UHFFFAOYSA-N  
DPTVRZXQCBYWIW-UHFFFAOYSA-N  
FBDUYUDFMFZSDJ-UHFFFAOYSA-N  
ISNRVVKKHPECQN-UHFFFAOYSA-N  
RDGWQFSLTSPRBG-UHFFFAOYSA-N  
DYDUQRQYDQHKJU-WDZFDZDKYSA-N  
IPQKDIRUZHIOIM-UHFFFAOYSA-N  
RTIXKCRFFJGDFG-UHFFFAOYSA-M

COc1c(OC)c(OC)c(c2c1oc(cc2=O)c1cc(O  
COc1c(OC)c(OC)c2c(c1O[C@@H]1O[C@  
COc1cc(O[C@@H]2O[C@H](CO[C@@H  
OC[C@H]1O[C@@H](Oc2ccc(c(c2c2cc(=  
OC[C@H]1O[C@@H](Oc2cc(O)c(c3c2c(=  
COc1c(O[C@@H]2O[C@H](C(=O)O)[C@  
CC12CCC(CC1)C(O2)(C)C  
OCCc1cccc1  
COc1ccc(cc1)c1cc(=O)c2c(o1)cc(cc2O)O  
COc1c(O)cc(c2c1oc(cc2=O)c1cccc1)O  
COc1c(OC2OC(C(=O)O)C(C(C2O)O)O)cc  
OC1CC2C(C1(C)CC2)(C)C  
C=CC(CCC=C(C)C)(O)C  
OC(=O)c1cccc1  
COc1cc(O)cc2c1C(=O)CC(O2)c1cccc1  
CC1=CCC(C)(C)C=CCC(=CCC1)C  
C=CCc1ccc(c(c1)OC)O  
CC1CCC2=C1CC1CCC2(C1(C)C)C  
Oc1ccc(cc1)c1cc(=O)c2c(o1)cc(c(c2O)O)  
COc1c(O)ccc(c1c1cc(=O)c2c(o1)c(OC)c(c  
COc1cc(O)cc(c1C(=O)/C=C/c1c(O)cccc1  
OC(=O)C1OC(Oc2cc3OC(CC(=O)c3c(c2  
O=C1CC(Oc2c1c(O)c(c(c2)O)O)c1cccc1  
Oc1cc2OC(CC(=O)c2c(c1)O)c1ccc(c(c1)C  
COc1ccc(cc1)c1cc(=O)c2c(o1)cc(c(c2O)C  
COc1ccc(c(c1)O)OC)c1oc2cc(O)cc(c2c(=C  
CC(=C)C1CCC(C2=C(C1)C(C)CC2)C  
OCC1OC(OCCc2ccc(c(c2)O)OC)C(C(C1C  
OCCc1ccc(c(c1)O)OC  
CCOC1OC(CO)C(C(C1(O)c1ccc(c(c1)O)C  
CCOC1OC(CO)C(C(C1(O)c1ccc(c(c1)O)C  
COc1cc(O)c2c(c1)O)C(=O)CC(O2)c1cccc  
OCC1OC(OCCc2ccc(cc2)O)C(C(C1O)O)  
OCCc1ccc(cc1)O  
OC(=O)C1OC(Oc2cc3oc(cc(=O)c3c(c2O)  
COc1ccc(c(c1)c1cc(=O)c2c(o1)c(OC)c(c  
OC1C(Oc2cc3oc(cc(=O)c3c(c2O)O)c2ccc  
CCC(C(C)C)CCC(C1CCC2C1(C)CCC1C2  
CCC(C(C)C)CCC(C1CCC2C1(C)CCC1C2  
COc1cc(cc(c1)O)OC)C1OCC2C1COC2c1c  
CC(C(CCC(C1CCC2C1(C)CCC1C2CCC2  
CC1=CCC23CC1C(C)(C)C2CCC3C  
OCC1OC(Oc2cc(O)c3c(c2)oc(cc3=O)c2cc  
CCCCC(C=C)O  
CC1CCC(C(=O)C1)C(C)C  
Oc1ccc(cc1)c1cc(=O)c2c(o1)cc(cc2O)O  
CC1=CCCC(=C)C=CC(CC1)C(C)C  
OCC1OC(C(C1O)O)(CO)OC1OC(CO)C(C  
O=CCCCCCCCC=O  
Oc1cc2OC(c3c(O)cccc3O)C(C(=O)c2c(c1  
Oc1ccc2c(c1)oc(cc2=O)c1ccc(c(c1)O)O  
OCC1OC(Oc2cc(O)c3c(c2)OC(C(C3=O)C  
Oc1ccc(cc1)c1cc(=O)c2c(o1)c(OC1OC(C  
OCC1OC(C(C(C1O)O)O)c1c(O)c(C2OC(C  
N#C/C=C(\c1cccc1)/c1cccc1  
O=C1/C(=C/c2cccc2)/Oc2c1c(O)c(c(c2)C  
OCC1OC(Oc2cc3oc(cc(=O)c3c(c2O)O)c2  
Oc1cc([O-])c2c(c1)oc(cc2=O)c1cccc1

XESIWMQIMUSNPRO-UHFFFAOYSA-M  
WLOAMJAMSFVOOZ-UHFFFAOYSA-N  
OVMFOVNOXASTPA-UHFFFAOYSA-N  
NZZNHGSHLAHPCG-UHFFFAOYSA-N  
GMYHXOPIKMGWOM-UHFFFAOYSA-N  
QNVPMKAFVCVXMFH-UHFFFAOYSA-N  
IDONYWHRKBUDOR-UHFFFAOYSA-N  
SWIWTAJTJOYCTB-GZTJUZNOSA-N  
SKWTXGMULLCOGN-SNAWJCMRSA-N  
QSEHQWFPCMNMMPH-UHFFFAOYSA-N  
SGIOAFBVWVUCQP-UHFFFAOYSA-N  
QZOALWMSYRBZSA-UHFFFAOYSA-N  
HGTMGCDIPYGVKA-UHFFFAOYSA-N  
AOFVSVYRSUDBN-UHFFFAOYSA-N  
GYDIPQRDLDOTECG-MDZDMXLPSA-N  
VWDLOXMZIGUBKM-CMDGGGOBGSAN  
SVZGCYLXISBVQK-UHFFFAOYSA-N  
DSTCZBGJCUOFLM-UHFFFAOYSA-N  
PXDasGXIBCEXNH-UHFFFAOYSA-N  
HNZGKRAKJFZQAY-UHFFFAOYSA-N  
QWUHUBDKQQPMQG-UHFFFAOYSA-N  
UYOJEKMKWXYOEQ-UHFFFAOYSA-N  
JRYNOEBZHPTOT-UHFFFAOYSA-N  
YLOZPZMPWNUOJV-UHFFFAOYSA-N  
QXIPXNZUEQYPLZ-UHFFFAOYSA-N  
SCZVLDRHREVKTSU-UHFFFAOYSA-M  
GLMWHQIFJIURES-UHFFFAOYSA-N  
QZAXKZRZMAXPSF-UHFFFAOYSA-N  
DGLBFMRIIDZOJI-UHFFFAOYSA-N  
OBVZFHXXNMIIRJ-UHFFFAOYSA-N  
LUSOAMBDAXTB-X-UHFFFAOYSA-N  
IDZNVJWQZDSPIX-UHFFFAOYSA-N  
LZERJKGWTQYMBB-UHFFFAOYSA-N  
WMPDAIZRQDCGFH-UHFFFAOYSA-N  
MOFOLNOWFPVLGZ-UHFFFAOYSA-N  
RBVYFSLWUBLPMG-UHFFFAOYSA-N  
CWVRJTMFETXNAD-DUXPHYHPUSA-N  
BJNCWLSOQIVKIX-UHFFFAOYSA-N  
USQXPEWRYWRRJD-UHFFFAOYSA-N  
IDRSJGHHZXBATQ-UHFFFAOYSA-N  
MMDUKUSNQNWVET-UHFFFAOYSA-N  
KSEBMYQBYZTDHS-HWKANZROSA-N  
LNQCUTNLHUQZLR-UHFFFAOYSA-N  
FBSKJMQYURKNSU-QPJXVBHSA-N  
HKEAFJYKMMKDOR-UHFFFAOYSA-N  
ODDRJEWIOFPAOL-UHFFFAOYSA-N  
CXMXRPHRNRROMY-UHFFFAOYSA-N  
SGNBVLSWZMBQTH-UHFFFAOYSA-N  
SCZVLDRHREVKTSU-UHFFFAOYSA-N  
HCXVJBMSMIARIN-CMDGGGOBGSAN  
XESIWMQIMUSNPRO-UHFFFAOYSA-N  
UWIBDEQRXHODSE-UHFFFAOYSA-N  
KJXSIXMJHKAJOD-LSDDHAIUSA-N  
BBFQZRXYIEMAW-UHFFFAOYSA-N  
LKLWVKCEYSPQHL-HRAATJIYSA-O  
LKLWVKCEYSPQHL-KKSFZXQISA-O  
XBYDCPLYWSKTAA-UHFFFAOYSA-N  
RKJCLPSFLUKWQY-UHFFFAOYSA-N

Oc1cc(O)c2c(c1)oc1c(c2=O)cccc1[O-]  
OCc1ccc(c2c1C(=O)c1cccc(c1C2=O)O)O  
OCC1OC(C(C(C1O)O)O)c1c(O)c(C2OCC  
OCC1OC(C(C(C1O)O)O)c1c(O)c(C2OCC  
OCC1CCC(CC1)C(=C)C  
COc1ccc(c(c1)OC1OC(COC2OCC(C2O))(  
OCC1OC(Oc2ccc(cc2)CCC(=O)C)C(C(C1  
COc1cc/C=C/C(=O)OC2CCC3(C(=CCC4  
C/C=C/c1ccc(cc1OC)OC  
O=Cc1c(O)c(OC)c(c2c1c(O)c(c(c2)C)c1c(  
Oc1ccc(cc1)c1oc2cc(O)cc(c2c(=O)c1O)O  
OCC1OC(OC2CCC3(C(C2)C(=O)CC2C3(  
CN1CC(C)C2C(C1)C(C)CC2  
CCC(CCCCCCCCCCCC(=O)OC)C  
CCC(C(C)C)/C=C/C(C1CCC2C1(C)CCC1  
CCC(C(C)C)/C=C/C(C1CCC2C1(C)CCC1  
CCCC(CC(Cc1ccc(c(c1)OC)O)O)O  
CCCCCCCCCCCCCCCC(=O)OCC1=CC2  
OCC1OC(Oc2cc(ccc2O)C(=O)OC)C(C(C1  
OCC1OC(OC2OC=C(C3C2C(O)CN2C(C3  
COc1cc2oc(cc(=O)c2c(c1O)O)c1ccc(c(c1'  
COc1cc(c(cc1OC)O)c1ccc2c(c1=O)ccc(c2  
COc1cc(ccc1OC)C1=C(O)C(c2c(O1)cc(O'  
OCC1OC(Oc2cc(O)c3c(c2OC)oc(cc3=O)c  
COc1c(OC2OC(C(=O)O)C(C(C2O)O)O)cc  
COc1cc(ccc1[O-])c1cc(=O)c2c(o1)cc(cc2(  
COc1c(O)c(OC)c2c(c1O)c(=O)cc(o2)c1cc  
COc1c(oc2c(c1=O)c(O)c(c(c2)O)O)c1ccc(  
OCC1OC(Oc2ccc(c3c2c(=O)cc(o3)c2cccc  
O=CC(c1cc(O)c2c(c1OC)oc(cc2=O)c1ccc  
COc1cc(O)cc2c1C(=O)CC(O2)c1c(O)cccc  
COc1cc(O)c2c(c1)oc1c(c2=O)cc(c(c1OC)  
COc1ccc(cc1)c1cc(=O)c2c(o1)cc(cc2O)O'  
COc1cccc(c1)C=O  
OC(=O)C1OC(Oc2cc(O)c3c(c2O)oc(cc3=  
COc1c(O)c(OC)c2c(c1O)c(=O)cc(o2)c1cc  
O=C(OC1CC(O)(CC(C1O)O)C(=O)O)/C(=  
Oc1cc2OC(c3cccc3O)C(C(=O)c2c(c1)O)  
Oc1cc2OC(CC(=O)c2c(c1)O)c1cc(O)c(c(c  
OC(=O)C1OC(Oc2cc(O)c3c(c2)oc(cc3=O'  
OCC1OC(C(C(C1O)O)O)c1c(O)c(C2OCC  
COc1cc/C=C/C(=O)O)ccc1O  
OCC1OC(Oc2cc3occc(c(=O)c3c(c2OC)O)c  
OCC1OC(OCc2ccc(c(c2)O)O)C(C(C1OC  
OCC1OC(C(C(C1O)O)O)c1c(O)ccc2c1oc  
OCC1OC(C(C1O)O)OOOC1OC(C(C1O)C  
OC(=O)CCCCCCCC(=O)O  
OC1CCC2(C(=CCC3C2CCC2(C3CCC2C  
COc1cc(ccc1O)c1cc(=O)c2c(o1)cc(cc2O)  
CCC(C(C)C)/C=C/C(C1CCC2C1(C)CCC1  
Oc1cc(O)c2c(c1)oc1c(c2=O)cccc1O  
COc1c(OC)c(OC)c(c2c1oc(c1cc(O)ccc1O  
Oc1cc2O[C@H](c3cc(O)c(c(c3)O)O)[C@H  
COc1cccc2c1cc([N+](=O)[O-])c1c2c2OCC  
COc1cc2CC[N@+](C@H)(c2cc1O)Cc1c  
COc1cc2CC[N@+](C@H)(c2cc1O)Cc  
[Hg-][SH2+]  
COC1=C(OC)C(=O)c2c(C1=O)c(O)c1c(c2

SGUKYTMQVPOB-UHFFFAOYSA-N  
RWSOTUBLDIXVET-UHFFFAOYSA-N  
BMOFEAKQXGGUPE-UHFFFAOYSA-N  
SLXSULZDDPRFBJ-UHFFFAOYSA-N  
LOXQKSBAJITUOX-BZDYRZRUSA-N  
RIGYMJVFEJNCKD-UHFFFAOYSA-N  
IBIPGYWNOBGEMH-DILZHRMZSA-N  
BEDSGEULUAVXQH-YGCGHWCOSA-N  
QIWWLKDHHMGRQL-SKMDTYRSSA-N  
PANKHBYNKQNAHN-MQQNZMFNSA-N  
SEBIKDIMAPSUBY-RTJKDTQDSA-N  
ZVXWFPVTHBWJOU-YYFGDFGFSA-N  
WSGPLSDARZNM CW-FCVLBCLDSA-N  
BEKYZOSRHNMGCR-FMZRL EOLSA-N  
OOGPWQHGQYUIAW-KDGF O E JISA-N  
UFCLZKMFXSILNL-PSEXTPKNSA-N  
AWJLBZCAQJYFDM-UHFFFAOYSA-N  
GYHKMDWFVHCCRA-UHFFFAOYSA-N  
WYIDBNAGSMCMET-UHFFFAOYSA-N  
ZYVBPTWKKGRSOZ-UHFFFAOYSA-N  
SPCURNZYGRLEBA-OUEWTLASSA-N  
JJVJSIBMTMIANL-CCVCSVFYSA-N  
RQRMWYOWQUEKAS-IWSP IJZSA-N  
MQBFFYQCZCKSBX-UHFFFAOYSA-N  
BMJZOVI SEITTRA-AHGLEFSXSA-N  
WXXRZUXRKRIXTA-GARJFASQSA-N  
XJMPAUZQVRGFRE-AYDWLWLASA-N  
JSKCJJNYSGWZDU-BYFUOZQISA-N  
AZKVVQKMDGGDSV-BCMR RPTOSA-N  
FYZYXYPB WLLGI-AUOPOVQUSA-N  
IBFYXTRXDNAPMM-BVTMAQQCSA-N  
ZJDOESGVOWAULF-OGJQONSISA-N  
WECGLUPZRHLCT-HZJYTTRNSA-N  
PTOZLBJRCJWJKV-VOGKFIJMSA-N  
HBOQXIRUPVQLKX-BBWANDEASA-N  
IHOXLUDKLLDPHW-UHFFFAOYSA-N  
ZZUBHVMHNVYXRR-UHFFFAOYSA-N  
SHGCFQDGGXDIFG-OWRRKEEJSA-N  
KEOITPILCOILGM-LLJOFIFVSA-N  
ODBRNZZJSYPIDI-VJXVFPJBSA-N  
RLRGKMMFFVWPHT-NUYPAGBLSA-N  
YXTURDGNXCWFHX-NEPODAOMSA-N  
QGDNIOFJAUCAMW-UHFFFAOYSA-N  
QULPQWKDDOBIOC-UHFFFAOYSA-N  
UQKOTVMFJYMJEP-UHFFFAOYSA-N  
OVSQVDMCBVZWGM-QSOFNFLRSA-N  
PUPKKEQDLNREIM-QNSQP KOQSA-N  
SMMQSMVUPDCNJU-UHFFFAOYSA-N  
DDKLBZJRUKEJA-VIZOYTHASA-N  
QATWTDKFCQHTAE-UHFFFAOYSA-N  
FLLWZPMYUAPJEA-UHFFFAOYSA-N  
HEOXCFTWPWVSG-OVCLIPMQSA-N  
PBLWSVWYIYVLDE-VGOFMYFVSA-N  
HGQFHBRDQM GDKQ-OVCLIPMQSA-N  
HQQKUDSFSYUGTI-UHFFFAOYSA-N  
DMXCZIUMBYRKQW-QPSGOUHRSA-N  
WPDUQFCORDILFF-VGOFMYFVSA-N  
KPWKGYKPSLJFDC-UHFFFAOYSA-N

Nc1ccn(c(=O)n1)C1OC(C(C1)OP(=O)(OC  
S  
S[AsH2]  
S[AsH]=S  
OC[C@H]1O[C@@H](O[C@@H]2OC=C(C  
COc1ccc(cc1OC)c1oc2cc(OC)c(c2c(=O  
OC[C@H]1O[C@@H](O[C@@H]2OC=C  
COc1cc/C=C/C(=O)O[C@@H]2[C@H](O  
OCC1=CC[C@H]2[C@H]1[C@@H](OC(=C  
C/C(=C\C=C\C=C\C=C\C=C\C(=O)O)/C)  
OC[C@H]1O[C@@H](OC[C@H]2O[C@  
OCC1=C[C@@H]([C@H]2[C@H]1[C@@  
OCC1=C[C@@H]([C@H]2[C@H]1[C@@  
O=C(O[C@H]1[C@H](OC(=O)/C=C/c2ccc  
O=C(O[C@@H]1CC(O)(C[C@H](C1OC(=O  
O=C(O[C@H]1[C@H](O)C[C@@](C(C  
COc1c(c2cc(=O)c3c(o2)cc(cc3O)O)c(OC)  
Oc1ccc(c(c1)O)c1oc2c(c1)ccc(c2)O  
Oc1ccc2c(c1)OCc1c2oc2c1ccc(c2)O  
COc1cc(c2cc(=O)c3c(o2)cc(cc3O)O)c(c  
OCC1C=C[C@H]2[C@H]1[C@@H](OC(=O  
OC[C@H]1O[C@@H](OC2OC=C([C@@  
OCC1=CC[C@H]2[C@@H]1COC(=O)[C@  
COc1c(OC)cc(cc1OC)c1cc(=O)c2c(o1)c(C  
CC(=CC(=O)C[C@H]([C@H]1CC[C@@]2  
CCO[C@@H]1OC[C@H]2[C@@H]1CC(=O  
OC[C@H]1O[C@@H](O[C@@H]2OC=C(C  
OC[C@H]1O[C@@H](OC2OC=C([C@@  
COC(=O)C1=CO[C@H]([C@H]2[C@@H]  
OCC1=CC[C@H]2[C@@H]1[C@@H](OC  
OC[C@H]1O[C@@H](O[C@@H]2OC=C(C  
OC[C@H]1O[C@@H](O[C@@H]2OC=C(C  
CCCCC/C=C\C/C=C\CCCCCCCCC(=O)OC  
CCCCC/C=C\C/C=C\CCCCCCCCC(=O)OC  
CCCCC/C=C\C/C=C\CCCCCCCCC(=O)OC  
Oc1ccc2c(c1)OCC(=C2)c1ccc(cc1O)O  
Oc1ccc(cc1)C1=Cc2c(OC1)cc(cc2)O  
OC[C@]1(C)[C@@H](CC[C@]2([C@H]1C  
OC[C@]1(C)[C@@H](CC[C@]2([C@H]1C  
OC[C@H]1O[C@H]([C@@H]([C@H]([C@  
C=C(C(C)C)CCC([C@H]1CC[C@@]2([C@  
OC[C@]12CC[C@@]3(C=CC[C@H]4[C@  
COc1cc(O)c2c(c1)oc(cc2=O)c1c(OC)c(OC  
COc1c(OC)cc(cc1OC)c1cc(=O)c2c(o1)cc  
COc1cc(O)c2c(c1)oc(cc2=O)c1cc(OC)c(c  
OC[C@H]1O[C@@H](Oc2c(oc3c(c2=O)c  
Oc1ccc(cc1)c1oc2cc(O[C@@H]3O[C@@  
COc1ccc2c(c1)OCc1c2oc2c1ccc(c2)O  
C/C(=C\Cc1c(O)c(O)cc2c1oc1c2COc2c1c  
CC(=CCCC1(C)C=Cc2c(O1)c(O)c1c(c2)o  
COc1ccc2c(c1)OCc1c2oc2c1cc(c(c2)O)O  
COC(=O)c1c(O)c(O)c(c2c1c1COc3c(c1o2  
C/C(=C\Cc1c(O)c(O)cc2c1oc1c2c(=O)oc2  
C/C(=C\Cc1c(O)c(O)cc2c1oc(c2C)c1ccc(c  
Oc1ccc(c(c1)O)c1oc2c(c1Cc1cc3c(cc1O)  
C/C(=C\Cc1c(O)c(O)cc2c1oc(c2Cc1cc2c  
C/C(=C\Cc1c(O)c(O)cc2c1oc1c2c(=O)c2c  
COc1cc(c(cc1O)O)C1COC2c(C1=O)ccc(c:



NYGZYUAVZPIKBZ-UHFFFAOYSA-N  
IRVDWFYPCQFZTA-PMACEKPBSA-N  
UCYCRJCXEHJRDP-PMACEKPBSA-N  
WLDDYRDGRVNYEY-SFTDATJ TSA-N  
MVDMPADXXDHNOL-JISJETCLSA-N  
JEHZELNRHNBZFM-UHFFFAOYSA-N  
GLMLQROWOJXFJA-FRKPEAEDSA-N  
JVYKYLOUVXNIMK-VIZOYTHASA-N  
DJJQWLWXJHJPIH-UHFFFAOYSA-N  
AWVKZYDVQDHNKA-JTQLQIEISA-N  
NGWYJYHAFMLHNW-UHFFFAOYSA-N  
ZXALVCPICGWIFY-SNAWJCMRSA-N  
CSZKAJDXUNNJKV-UHFFFAOYSA-N  
KRFBMPVGAYGGJE-UHFFFAOYSA-N  
PTPQTMGOUIHFNR-LGGDGBFUSA-N  
KVWWIYGFBYDJQC-GHMZBOCLSA-N  
JBBLCGRIZVRWJC-MNIQVYHASA-N  
PUCHCUYBORIUSM-UHFFFAOYSA-N  
PTPQTMGOUIHFNR-IYQBLMFUSA-N  
IGGUPRCHHJZPBS-UHFFFAOYSA-N  
YXTKNMNZABXVJX-ZYMWYSJDSA-N  
PLAPMLGJVGLZOV-VPRICQMDSA-N  
LBTAFDHXNSPZSZ-QLDIZCGWSA-N  
IAGSHEHQJJTLR-FNINEVAMSA-N  
DFBCVZCHRMESFM-IPRKTUQPSA-N  
WSGPLSDARZNM CW-LPGR TNKPSA-N  
YSIFYNVXJOGADM-KDYWOABDSA-N  
ZZYMHGCHGDEWKR-LBVFNNMGSA-N  
JPUKWEQWGBDDQB-DTGCRPNFSA-N  
CWVRJTMFETXNAD-DUXPHYPUA-N  
AZKVVQKMDGGDSV-UHFFFAOYSA-N  
MIJYXULNPSFWEK-UHFFFAOYSA-N  
OLOOJGVNMBJLLR-UHFFFAOYSA-N  
OVSQVDMCBVZWGM-UHFFFAOYSA-N  
IRVSYXACZHIMTN-UHFFFAOYSA-N  
QHHVLIUOUPHBGA-UHFFFAOYSA-N  
LLIOFDFSNDWFFZ-UHFFFAOYSA-N  
XLNDUMVWOZNMNJ-UHFFFAOYSA-N  
SEBIKDIMAPSUBY-CKZAFTHVSA-N  
IBFYXTRXDNAPMM-UHFFFAOYSA-N  
IKGXIBQEEMLURG-UHFFFAOYSA-N  
YSIFYNVXJOGADM-UHFFFAOYSA-N  
BWZNV EVIYLLKOG-UHFFFAOYSA-N  
ALYNDLNZVKVGQH-QSZPNPOGSA-N  
WCGUUGGRBIKTOS-UHFFFAOYSA-N  
PGOYMURMZNDHNS-UHFFFAOYSA-N  
REFJWTPEDVJJIY-UHFFFAOYSA-N  
RWASOQSEFLDYLC-UHFFFAOYSA-N  
JOPOVCBBYLSVDA-UHFFFAOYSA-N  
RYGMFSIKBFXOCR-UHFFFAOYSA-N  
CWYNVVGGOAEACU-UHFFFAOYSA-N  
WAEMQWOKJMHJLA-UHFFFAOYSA-N  
PXHVJJICTQNCMI-UHFFFAOYSA-N  
XRCKXJLUPOKIPF-UHFFFAOYSA-N  
KXCAEQNNTZANTK-UHFFFAOYSA-N  
PTFCDOFLOPIGGS-UHFFFAOYSA-N  
FBPFZTCFMRRESA-UHFFFAOYSA-N  
OEYIOHPDSNJKLS-UHFFFAOYSA-N

COc1cc2c(cc1O)OC1C2COc2c1ccc(c2)O  
CC(=CC[C@@]12COc3c([C@@H]1O)c1c  
CC(=CC[C@@]12COc3c([C@@H]1O)c1c  
COc1cc2O[C@@H]3[C@@](c2cc1O)(CC  
CC(=CCCC1(C)O)c2c(O)cc3c(c2CC1O)O[  
COc1cc(c(cc1O)O)C1COc2c(C1=O)c(O)c  
C/C(=C\Cc1c(O)cc(c2c1occ(c2=O)c1ccc(c  
C/C(=C\Cc1c(O)c(O)cc(c1O)c1coc2c(c1=O  
Oc1ccc2c(c1)OC=C(C2)c1ccc(cc1O)O  
COc1cc([C@@H]2COc3c(C2)ccc(c3)O)c(  
Oc1ccc(c(c1)O)C(=O)C(=O)c1ccc(cc1O)C  
CC(=CC(C/C=C/Cc1c(O)cc2c(c1O)C(=O)O  
CC(=CCCC1(C)C=Cc2c(O1)cc1c(c2O)C(=O  
COc1ccc(cc1)c1cc(=O)c2c(o1)c(OC)c(c(c:  
OC[C@H]1C=C([C@@H]2[C@H]1C(=CC  
CCCC[C@@H]1[C@H](CCC1=O)CC(=O  
OC[C@H]1O[C@@H](O[C@H]2OC=C(C:  
CCCCSSC  
OC[C@@H]1C=C([C@@H]2[C@H]1C(=C  
CCCCCCCCCCCCCCCCCCCCCCCCCCCC  
OC[C@H]1O[C@@H](OC[C@H]2O[C@H]1  
OC[C@H]1O[C@@H]([C@@H]([C@H]([C@  
OC[C@H]1O[C@@H](O[C@H]2CC(=C  
OC[C@]1(C)[C@@H](CC[C@]2([C@H]1C  
C=C(C(C)C)CC[C@H]([C@H]1CC[C@@]  
OCC1=C[C@H]([C@H]2[C@H]1[C@@H]  
OC[C@H]1O[C@@H](OC2OC=C([C@@H]  
CC(=CC(=O)CC([C@H]1CC[C@@]2([C@  
OC[C@H]1O[C@@H](Oc2c(oc3c(c2=O)c  
O=C(OC1CC(O)(CC(C1O)O)C(=O)O)/C(=O  
COC(=O)C1=COC(C2C1CC=C2CO)O  
OC1CCC2(C(C1(C)C)CCC1(C2CC=C2C1  
CC(=CCOc1c2occc2cc2c1oc(=O)cc2)C  
OCC1OC(Oc2c(oc3c(c2=O)c(O)cc(c3)O)c  
CC(=CCOc1c2C=CCc2cc2c1C=CC(=C)O  
CCOC1OCC2C(C1)CC(=O)CC2(C)C  
OCC1OC(OC2OCC(C3C2C(=CCC3)CO)(  
COC(=O)C1COC(C2C1CCC=C2CO)O  
OCC1OC(OCC2OC(OC(=O)/C(=C/C=C/C  
OCC1OC(OC2OC=C(C3C2C(=CC3)CO)C  
Oc1cc(O)c2c(c1)oc(c(c2=O)OC1OC(COC  
OCC1OC(OC2OC=C(C3C2C(C)O)CC3O  
OC1CC(C2C1C(=COC2O)C(=O)O)(C)O  
Oc1ccc2c(c1/N=N/c1cccc(c1)/N=N/c1cccc  
CC1CCC2(C(C1C)C1=CCC3C(C1(CC2)C  
OCC1(C)C(O)CCC2(C1CCC1(C2CC=C2C  
Oc1cc(O)c2c(c1)oc(c(c2=O)O)c1ccc(c(c1)  
[BeH2]  
[Cr+6]  
[Cu]  
[Fe+2]  
[Mn+2]  
[Ni]  
[PbH4]  
[SnH4]  
[Zn+2]  
OCC(C(C(C(CO)O)O)O)O  
OCC[N+](C)(C)C

JSKCJJNYSGWZDU-UHFFFAOYSA-N  
KGDIDCUROGOWDM-UHFFFAOYSA-N  
CDAISMWEUEBRE-UHFFFAOYSA-N  
ZVXWFPTVHBWJOU-UHFFFAOYSA-N  
WGNYSWQMLMVUIP-DUXPHYPUA-N  
REFJWTPEDVJJIY-UHFFFAOYSA-M  
GGNQRNBDZQJCCN-UHFFFAOYSA-N  
KZNIFHPLKGYRTM-UHFFFAOYSA-M  
TZBJGXHYKVUXJN-UHFFFAOYSA-M  
ZCOLJUOHXJRHI-UHFFFAOYSA-N  
YCCILVSKPBXVIP-UHFFFAOYSA-N  
VMNGEGPLZYRNA-UHFFFAOYSA-N  
XHCADAYNFIFUHF-UHFFFAOYSA-N  
SPXYMBLXSLZSEX-UHFFFAOYSA-L  
CTOLSFASROFSCG-UHFFFAOYSA-N  
JXOHGGNKMLTUBP-UHFFFAOYSA-N  
KRZBCHWVBQOTNZ-FCXRPNKRSA-N  
UFCLZKMFXSILNL-FCXRPNKRSA-N  
IYXQRCXQQWUFQV-FCXRPNKRSA-N  
KXEWLJDTPOIUSH-UHFFFAOYSA-N  
ZJDOESGVOWAULF-UHFFFAOYSA-N  
SUCGXPHEYBRFIL-UHFFFAOYSA-N  
OXNHRKGGZZFWUQZ-QORFUXSJSJA-N  
CZSBHMFVLYIQQ-YWYBPMHCSA-N  
SEBIKDIMAPSUBY-MVELCSNHSA-N  
IGWDEVSBKEYORK-UHFFFAOYSA-N  
UOURIOWCMYPGGF-UHFFFAOYSA-N  
GGGDNPWMMNJRNFN-UHFFFAOYSA-N  
GEWMGBJPZDGMSS-UHFFFAOYSA-N  
DHWBTJZWBYHEM-UHFFFAOYSA-N  
LOXQKSBAJITUOX-UHFFFAOYSA-N  
DSCVRGCAJUTEM-UHFFFAOYSA-N  
OZKNMGZZFOYTHQ-MDZDMXLPSA-N  
MGWAVDBGNNKXQV-UHFFFAOYSA-N  
ZTDNKQJEIFATQN-UHFFFAOYSA-N  
TTYDGCKGPGQOMOK-UHFFFAOYSA-N  
OOGPWQHGQYUIAW-KBXRYBNXSA-N  
BEKYZOSRHNMGCR-KBXRYBNXSA-N  
NMVUNDOHFYILSF-UHFFFAOYSA-N  
IQGURDMZLNWKPEW-VHYPUYLSA-N  
BTTOWNPBGPOLE-UHFFFAOYSA-N  
KWLOAKAXMOYBRK-XNTDXEJSSA-N  
XQUFDDXBHJINGZ-UHFFFAOYSA-N  
LBTAFDHXNSPZSZ-UHFFFAOYSA-N  
FOONTNRMWNJWCL-UHFFFAOYSA-N  
ZFRKQXVRDFCRJG-UHFFFAOYSA-N  
ZMDOPLQSOGZPJN-UHFFFAOYSA-N  
RTATXGUCZHCSNG-UHFFFAOYSA-N  
CRDWYCSWUMQZMG-RSZDNHPTSA-N  
FZRIRHAXJWMMFP-UHFFFAOYSA-N  
KIYYSICAJWQ CER-UHFFFAOYSA-N  
GYDIPQRDLQTECG-MDZDMXLPSA-N  
VWDLOXMZIGUBKM-CMDGGGOBGSAN  
KZJWDPNRJALLNS-UHFFFAOYSA-N  
XMLSXPIVAXONDL-SNAWJCMRSA-N  
STCGEEFQLSTNRZ-UHFFFAOYSA-N  
RMTXUPIIESNLPW-AOSYACOCSA-N  
WOLHVDCCOJEKFW-UHFFFAOYSA-N

OCC1OC(OC2OC=C(C3C2C(=C)C(C3)O)  
O=CC1=COC(C2C1CC(C2=C)O)OC1OC(  
OC1C(O)C(O)C(C(C1O)O)O  
OCC1=CC(C2C1C(OC=C2C(=O)O)OC1C  
OCC1OC(Oc2cocc2=O)C(C(C1O)OC(=C  
Oc1cc(O)c2c(c1)oc(c(c2=O)[O-])c1ccc(c(c  
Oc1ccc(c(c1)O)O  
Oc1ccc(cc1)c1cc(=O)c2c(o1)cc(cc2[O-])O  
Oc1ccc(cc1)c1coc2c(c1=O)c([O-])cc(c2)O  
OCC1OC(Oc2cc(O)c3c(c2)occ(c3=O)c2cc  
OCCc1ccc(cc1)O  
ON(Cc1ccc(cc1)O)C1ccc(cc1)O  
OCC1OC(Oc2cc3ccc(=O)oc3cc2O)C(C(C  
O=C1O[BiH])Oc2c1cccc2  
OCC1OC(Oc2ccc3c(c2O)oc2c(c3=O)c(O)  
OC1CC(=CC(C1O)O)C(=O)O  
O=C(OC1CC(O)(CC(C1O)OC(=O)/C=C/c'  
O=C(OC1C(O)CC(CC1OC(=O)/C=C/c1cc  
O=C(OC1C(O)CC(CC1O)(OC(=O)/C=C/c'  
OCC1=CCC2C1C(OC=C2C(=O)CO)OC1(  
OCC1OC(OC2OC=C(C3C2C(=CC3)CO)C  
OC1CCNC(C1O)C(=O)O  
COC(=O)/C(=C/C=C/C(=C/C=C/C=C/C(=C  
OCC1OC(OCC2OC(OC(=O)/C(=C/C=C/C  
OCC1OC(OCC2OC(OC(=O)/C(=C/C=C/C  
CC(=CCOc1c2ccoc2cc2c1ccc(=O)o2)C  
COc1cc(O)c(c(c1C(=O)C)O)C=O  
CC(=O)Nc1c(l)c(N(C(=O)C)C)c(c(c1)C(=  
CC(=O)OC(C(=O)O)C1CCC2=C1C(O)OC  
OCC1OC(OC2OC=C3C4C2C(=CC4(C)O(  
OCC1OC(OC2OC=C(C3C2C(=CC3)COC  
COC(=O)C1C(O)CCCN1C(=O)OC(C)(C)C  
COC1C2OC(=O)C(C2(O)C(C)C)C2(C1(C)  
CC(COC(=O)c1cccc1C(=O)OCC(C)C)C  
CNC1CCC2(C(=CCC3C2CCC2(C3CCC2(  
CC(=CC(=O)CC(C1CCC2(C1(C)CCC13C  
O=C(OC1CC(O)(CC(C1OC(=O)CC(CC(=  
O=C(OC1C(OC(=O)/C=C/c2ccc(c(c2)O)O  
CC1CC(O)(CC(C1O)O)C(=O)O  
C/C=C/CCCC/C=C/CC(=O)O  
OCC1=CCC2C1COC(=O)C2(C)CO  
O=C(OC1C(O)CC2(C(C1(C)C)CCC1(C2C  
OCC1OC(OC2OC=C(C3C2C(C)(O)CC3)C  
OCC1OC(OC2CC(=C(C(C2)(C)C)C(=O)O  
OCC1OC(OCC2C(=CC(=O)CC2(C)C)C)C  
Cc1c[nH]c2c1cccc2  
Oc1cc(O)c2c(c1)oc(c(c2=O)OC1OC(COC  
Oc1ccc(cc1)c1oc2cc(O)cc(c2c(=O)c1OC1  
OCC1OC(OCC2OC(OC(=O)/C(=C/C=C/C  
CC1CC(C(=O)O)C2C(C1C)C1=CCC3C(C  
CC(=O)OC1CCC2(C(C1(C)C)CCC1(C2C(  
CCC(C(C)C)/C=C/C(C1CCC2C1(C)CCC1  
CCC(C(C)C)/C=C/C(C1CCC2C1(C)CCC1  
CCC(C(C)C)CCC(C1CCC2C1(C)CCC1C2  
CC/C=C/CC1=C(C)CCC1=O  
CCC1C(CC2C1(C)CCC1C2CC(C2C1(C)C  
CCC/C=C/C=C/C/CCCCCCCc1cccc(c1O)  
CCCCC1CC(=O)CC1CC(=O)OC

OIPHBKBSAKTTI-IVZWYUIFSA-N  
WXGBJURRRZPBDS-UHFFFAOYSA-N  
QIQXTHQIDYTFRH-UHFFFAOYSA-N  
DAGYDJHSDMRWJX-UHFFFAOYSA-N  
DOIRQSBPFJWKBE-UHFFFAOYSA-N  
UMZZGLBLVAIHPM-UHFFFAOYSA-N  
FAPDDOBMIUGHIN-UHFFFAOYSA-K  
LTUZVVOPXHMYOH-UHFFFAOYSA-N  
WSGPLSDARZNM CW-UHFFFAOYSA-N  
OVNBCJLEFGLOJC-UHFFFAOYSA-N  
XJMPAUZQVRGFRE-UHFFFAOYSA-N  
JBBLCGRIZVRWJC-UHFFFAOYSA-N  
AFFNBNJOIDYUQN-UHFFFAOYSA-N  
FYZYXYLPBWLLGI-UHFFFAOYSA-N  
QIWWLKDHHMGRQL-RUDMXATFSA-N  
JJVJSIBMTMIANL-UHFFFAOYSA-N  
JGHUOJAZXGSFRI-YMOMHROCSA-N  
ABRULANJVJLFI-UHFFFAOYSA-N  
DAUAQNGYDSHRET-UHFFFAOYSA-N  
YSSFBMRXSHCURK-UHFFFAOYSA-N  
RODXRVNMMDRFIK-UHFFFAOYSA-N  
GUAFOGOEJLSQBT-UHFFFAOYSA-N  
FCXRFTLSXMRXTM-UHFFFAOYSA-N  
WKOLLVMJNQIZCI-UHFFFAOYSA-N  
FLCVGMVLNHYJAW-UHFFFAOYSA-N  
GIKVSFNAEBQLGB-UHFFFAOYSA-N  
JMSVCTWVEWCHDZ-UHFFFAOYSA-N  
BEDSGEULUAVXQH-NSLJXJERSA-N  
KCDXJAYRVLXPFO-UHFFFAOYSA-N  
VJOBNGRIBLNUKN-UHFFFAOYSA-N  
KCFYHBSOLOXZIF-UHFFFAOYSA-N  
LUOAEJWSKPQLJD-UHFFFAOYSA-N  
VTCZPUMZAZMSB-UHFFFAOYSA-N  
ZRSNZINYAWTAHE-UHFFFAOYSA-N  
OOAXTXAQDYRKFM-UHFFFAOYSA-N  
BVEKTSFYGPYCTQ-UHFFFAOYSA-N  
WQPZLWXUXYRWDZ-HYQBVQLESA-N  
XJZRHAMUBWIJEV-UHFFFAOYSA-N  
PHYADMVYQURXS-GHXNOFRVSA-N  
NPJICTMALKLTFW-UHFFFAOYSA-N  
ATQIQIBBBWQWOT-NIBSWVOWSA-N  
DLZFGILSEBIZHZ-UHFFFAOYSA-N  
VULLCGFNYWDRHL-QHUUTLAPSA-N  
ADIDQIZBYUABQK-UHFFFAOYSA-N  
TUNFSRHWOTWDNC-UHFFFAOYSA-N  
WTUPZYOQFGPHOS-KZZDLZNXSA-N  
BNXFBCBJALNH OV-UHFFFAOYSA-N  
HNVWFUAOTFONLC-XVYDYJIPSA-N  
QXOKQINPRTYQK-XVYDYJIPSA-N  
JRYVBZDSFXDJAN-UHFFFAOYSA-N  
DARYRELQFBVEME-NXZHAI SVSA-N  
QRWMZZNSGRCHHG-KZZDLZNXSA-N  
YCOZIPAWZNQLMR-UHFFFAOYSA-N  
NDJKXXJCMXVB JW-UHFFFAOYSA-N  
QNGQIURXCUHNAT-UHFFFAOYSA-N  
RJWUMFHQJBBOD-UHFFFAOYSA-N  
LKXMXUPYWQQHNY-UHFFFAOYSA-N  
JZQKTMZYLHNFPL-BLHCBFLLSA-N

CCCCC#C/C=C/C=C/CC/C=C/C(=O)NC  
CCCCCCCCCCCC(C(CCC(C(CCCCCC  
CCCCCCCCCCCCCCCCCCCC(=O)O  
CCCCCCCCCCCCCCCCCCCCCCCC(C(C  
CCCCOC(=O)c1cccc1C(=O)OCCCC  
CCOC1(C)OCC2C1CC(=O)CC2(C)C  
Cl[Sb](Cl)Cl  
CN1CCCC21NC(=O)c1c2cccc1  
OCC1=CC(C2C1C(OC=C2C(=O)OC)OC1  
OCC1OC(OC2OC=C(C3C2C(=CC3O)CO  
OCC1OC(OC2OC=C(C3C2C(O)(CO)C=C  
OCC1OC(OC2OC=C(C3C2C(CO)(OC)C=  
OCC1OC(OC2OC=C(C3C2C(=C)C(C3)O'  
OCC1=CCC2C1C(OC=C2C(=O)OC)OC1(  
OCC1=CCC2C1C(OC=C2C(=O)OC)OC1(  
OCC1OC(OC2OC=C(C3C2C2(CO)OC2C  
COC(=O)CC1/C(=C/COC(=O)/C=C/c2ccc  
OCC1OC(C(C(C1O)O)O)c1c(OC)cc2c(c1  
COc1cc(ccc1OC)C(=O)O  
COc1cc(ccc1OC)c1cc(=O)c2c(o1)c(OC)c(  
COc1cc2ccc(=O)oc2cc1O  
COc1cc2oc(=O)ccc2cc1OC  
COc1c(O)cc2c(c1O)C(=O)CC(O2)c1ccc(c  
COc1cc(ccc1O)C(=O)O  
COc1cc(O)c2c(c1)oc(cc2=O)c1cc(OC)c(c  
COc1cc(OC)c2c(c1)oc(cc2=O)c1cc(OC)c(  
COc1cc(cc(c1O)OC)C(=O)O  
COc1cc(/C=C/C(=O)OC2C(O)CC(CC2OC  
COc1cc(C=O)cc(c1O)OC  
COc1cc(ccc1O)C1OCC2C1COC2c1cc(O  
COc1cc(cc(c1O)OC)C1CC(=O)c2c(O1)cc  
COc1cc(CO)cc(c1O)OC  
COc1c(OC)cc(cc1OC)O  
COc1ccc(cc1)C=O  
COc1ccc(cc1)c1oc2c(OC)c(OC)c(c2c(=  
COc1ccc(cc1)c1ccc2c(c1=O)c(O)cc(c2)O'  
COc1n/c(=C\2/C=CC(=O)C=C2O)/[nH]/c(=  
COC1C=C(C2C1C(=COC2OC1OC(CO)C  
OCC1OC(S/C(=N)OS(=O)(=O)O)/CCCS(=  
CCC(C(C)C)CCC(C1CCC2C1(C)CCC1C2  
OCC1OC(OC(=O)/C(=C/C=C/C(=C/C=C/  
OCC1OC(OCC2OC(OCC3=C(C)C(=O)CC  
OCC1OC(OCC2OC(OC(=O)/C(=C/C=C/C  
CC(=C)C1CCC(C2=C(C1)C(C)CC2)C  
CCCCCCCCCCCCCCCC(=O)O  
CCOC(=O)C1(O)CC(OC(=O)/C=C/c2ccc(  
OCC1OC(OCC2=C3C3C2C(OC=C3C(=C  
COc1cc(/C=C/C(=O)OC2C(O)CC(CC2OC  
COc1cc(/C=C/C(=O)OC2CC(O)(CC(C2O)  
OCC1OC(OC2OC=C(C3C2C(=CC3)CO)C  
COC(=O)C1(O)CC(OC(=O)/C=C/c2ccc(c(  
CCOC(=O)C1(O)CC(OC(=O)/C=C/c2ccc(  
CCCCCCCCCCCCCCCC  
CCCCCCCCCCCCCCCC  
CC1=CC=CC(CC1=O)(C)C  
CCCCCCCCCCCCCCCC(C)C  
COC(=O)C1=COC(C2C1CC=C2COC(=O)  
CCCCC/C=C/C=C/C=C/O

NDFKTBCGKNOHPJ-AATRIKPKSA-N  
YVBAUDVGOFCUSG-UHFFFAOYSA-N  
VLCHQFXSBHIBRV-UHFFFAOYSA-N  
SMUVABOERCFKRW-UHFFFAOYSA-N  
KKSIAZCUYVRKML-UHFFFAOYSA-N  
LNTHITQWFMADLM-UHFFFAOYSA-N  
XLTFNNCXVBYBSX-UHFFFAOYSA-N  
JPUKWEQWGBDDQB-UHFFFAOYSA-N  
YQUVCSBJEUQKSH-UHFFFAOYSA-N  
SGAWOGXMMPSZPB-UHFFFAOYSA-N  
CDOSHBSSFJOMGT-UHFFFAOYSA-N  
HTPQPMPFXUWUOT-PUNVMFJISA-N  
QAIPRVGONGVQAS-DUXPHYHPUSA-N  
ZPVOLGVTNLDBFI-UHFFFAOYSA-N  
LFAZJMJJLQUOPK-UHFFFAOYSA-N  
URTXFGOVQACIC-UHFFFAOYSA-N  
AOMOJMFQSLZWRN-UHFFFAOYSA-N  
PFTAWBLQPZVEMU-UHFFFAOYSA-N  
FUZZWVXGSFPDMH-UHFFFAOYSA-N  
GYFFKZTYAFCTR-DUXPHYHPUSA-N  
IPCSVZSSVZVIGE-UHFFFAOYSA-N  
OPFTUNCRGUEPRZ-UHFFFAOYSA-N  
IBIPGYWNOBGEMH-UHFFFAOYSA-N  
KVWWIYGFBYDJQC-UHFFFAOYSA-N  
TZBJGXHYKVUXJN-UHFFFAOYSA-N  
PZNPHSFXILSZTM-UHFFFAOYSA-N  
OXNHRKGGZZFWUQZ-WTIHNSHESA-N

CCCC/C=C/C=O  
CCCCC1cccc1  
OCC1OC(OC2OC=C(C3C2C(C)(O)CC3)C  
O=Cc1cc(C)ccc1C  
OCC1OC(OC2OC=C(C3C2C(C)(O)CC3O  
OC(=O)c1cc(O)c(c(c1)O)O  
COc1c(O)cc(c2c1oc(cc2=O)c1cccc1)O  
OCC1OC(Oc2c(oc3c(c2=O)c(O)cc(c3)O)c  
OC(=O)c1ccc(c(c1)O)O  
O=CC1=C(C)C=CCC1(C)C  
C=CC(CCC=C(C)C)(O)C  
O=C1C=Cc2c(/C/1=N/Nc1ccc(cc1)/N=N/c  
OC(=O)/C=C/c1ccc(c(c1)O)O  
CC1CCCC(C1=O)(C)C  
OCC1OC(OCC2OC(OC(=O)C3=C(C)C=C  
OCC1OC(OCC2OC(OC(=O)C3=C(C)CCC  
OCC1(O)COC(C1O)OCC1OC(OCC2C(=C  
Oc1cc2OC(c3ccc(c(c3)O)O)C(Cc2c(c1)O)  
CCCCC(=O)O  
O=C(OC1C(O)CC(CC1O)(O)C(=O)O)/C=(  
CCCCCCCCCCCCCCCC(=O)O  
C=CC1(C)CCC(CC1C(=C)C)C(=C)C  
OCC1OC(OC2OC=C3C4C2C(=CC4OC3=  
CCCCC1C(CCC1=O)CC(=O)OC  
Oc1ccc(cc1)c1coc2c(c1=O)c(O)cc(c2)O  
CC1CCC2(OC1)OC1C(C2C)C2(C(C1)C1(  
COC(=O)/C(=C/C=C/C(=C/C=C/C=C(\C=(

>@H]3[C@@]([C@]1(C)CC2)(C)CC[C@@H]1[C@]3(C)C[C@@H](O)[C@@H](C1(C)C)O)C(=  
|2([C@H]1CC[C@@]1([C@@H]2CC=C2[C@@]1(C)CC[C@@]1([C@H]2[C@@H](C)[C@@H

@@]1([C@@H]2CC=C2[C@@]1(C)CC[C@@]1([C@H]2CC(C)(C)CC1)C(=O)O)C)C

;(C(=O)C(=C3O)C(=O)C)(C)C)c(c(c2O)C(=O)CCC)O)c(c(c1O)CC1=C(O)C(C(=O)C(=C1O)C(=

O[C@@H]2O[C@H](CO)[C@H]([C@@H]([C@@H]2O)O)O)c([O+]<sup>3</sup>)c2ccc(c(c2)O)[O-])[C@H](











:H]([C@@H]1[C@H]2CC[C@]2([C@@H]1CC[C@@H]2[C@H](CCC(=O)O)C)O)C

2O[C@]2(C)C[C@H](CC1(C)C)O)/C)/C=C/C=C/C=C/C1=C(C)C[C@H](CC1(C)C)O)\C

);@ @H]5O[C@H](COC(=O)C(C1)O)[C@ @H](O)[C@ @H]([C@H]5O)O)cc(cc4[o+]c3c1ccc(c(c'  
;@ @H]1O[C@H](COC(=O)CC(C(=O)OC[C@H]2O[C@ @H](O3)[C@H](O)[C@H]([C@ @H]2O

3(C2O)O)OC2C(OCC(C2O)O)OC2CCC3(C(C2(C)C)CCC2(C3CC=C3C2(C)CC(C2(C3CC(C)(C

2([C@]1(C)C[C@@H](O)C1C2=CC(=O)[C@H]2[C@]1(C)C[C@H](O)[C@@H](C2O)O)(O)C)  
!=CC[C@H]3[C@@]([C@@]2(C[C@H]1O)C)(C)CC[C@@H]1[C@]3(C)CC[C@@H](C1(C)C)C  
!=CC[C@H]3[C@@]([C@@]2(C[C@H]1O)C)(C)CC[C@@H]1[C@]3(C)CC[C@@H]([C@@]1(  
@H]4[C@@]3(C)CC[C@@H]3[C@]4(C)CC[C@@H]([C@]3(C)C=O)O)[C@@H]2CC([C@H]([C  
@H]4[C@@]3(C)CC[C@@H]3[C@]4(C)CC[C@@H]([C@@]3(C)C=O)O)[C@@H]2CC([C@H]

([C@]1(C)C[C@@H](O)C1C2=CC(=O)[C@H]2[C@]1(C)C[C@H](O)[C@@H](C2O)O)(O)C)C  
l]3[C@@]([C@@]2(C[C@H]1O)C)(C)CC[C@@H]1[C@]3(C)CC[C@@H](C1(C)C)O)(C)C

@H]1O)O[C@@H]1OC[C@H]([C@@H]([C@H]1O)O)O)C)Oc1cc2oc(cc(=O)c2c(c1O)O)c1ccc(

C\C4=N/C(=C\c5[nH]c(/C=c(/c2C)\[n-]3)c(CC)c5C=O)/C(=C4C)C=C)/C(C1CCC(=O)OC/C=C(/

3[C@]4(C)C(=O)C[C@]5([C@@]([C@@H]4CC=C3C(C2=O)(C)C)(C)C[C@H]([C@@H]5[C@]([C@@H]3C(=CC[C@@H]4[C@@]3(C)C(=O)C[C@]3([C@@]4(C)C[C@H]([C@@H]3[C@](C(=O)/C=

:[C@]3(C(C2(C)C)CC[C@@]2(C3CCC34[C@@]2(C)C[C@H](C2(C4C[C@](C)(CO)CC2)CO3)3=CCC4[C@@]([C@@]3(C[C@H]2O)C)(C)CCC2[C@]4(C)CC[C@@H](C2(C)C)O[C@@H]2

OC)[C@@H]([C@H]([C@@H]1OC(=O)/C=C/c1ccc(c(c1)OC)O)O[C@@H]1O[C@H](CO)[C@

[C@@H]3[C@H]2[C@@]2(COC(=O)C)O[C@H]2[C@H]3OC(=O)C)[C@@H]([C@H]([C@@H]([C@@H]2C=COC([C@@H]2[C@@]2([C@H]1O2)COC(=O)C)O[C@@H]1O[C@H](COC(=O)C)

OC)[C@H]([C@H]([C@@H]1O)O)[C@@H]1O[C@H](CO)[C@H]([C@@H]([C@H]1O)O)O

1]3[C@H]2[C@@]2(COC(=O)c4ccc(c(c4)OC)O)OC2[C@H]3O)[C@@H]([C@H]([C@@H]1O)C:1)OC)O)Cc1ccc(c(c1)OC)O[C@@H]1O[C@H](CO)[C@H]([C@@H]([C@H]1O)O)O2CC(=O)[C@@]1([C@@H]3CC[C@@]2(C31O[C@@H]3C(=O)O[C@H]2c1cocc1)C)C)(C)C

1]3[C@H]2[C@@]2(CO)O[C@H]2[C@H]3OC(=O)/C=C/c2ccc(c(c2)O)OC)[C@@H]([C@H]([C@@H]([C@@H]3CC[C@@]2([C@]31O[C@@H]3C(=O)O[C@H]2c1cocc1)C)C)(C)C

@H]3[C@H]2[C@@]2(COC(=O)C)O[C@H]2[C@H]3OC(=O)C)[C@@H]([C@H]([C@@H]1C)C[C@]2([C@@]3(C)C[C@H](C2[C@](C(=O)CCC(O)(C)C)(O)C)O)C)[C@H]1O)C)C

1]3[C@H]2[C@@]2(COC(=O)/C=C\c4ccccc4)O[C@H]2[C@H]3O)[C@@H]([C@H]([C@@H]1O)C)1]3[C@H]2[C@@]2(CO)O[C@H]2[C@H]3OC(=O)c2ccc(c(c2)OC)O)[C@@H]([C@H]([C@@H]1O)C)C

1]3[C@H]2[C@@]2(CO)O[C@H]2[C@H]3OC(=O)/C=C/c2ccc(c(c2)OC)O)[C@@H]([C@H]([C@

)][C@@H](COC(=O)/C=C/c3ccc(c(c3)O)O)O[C@H]([C@@H]2O)OCCc2ccc(c(c2)O)O)[C@@H]  
)][C@@H](COC(=O)/C=C/c3ccc(c(c3)OC)O)O[C@H]([C@@H]2O)OCCc2ccc(c(c2)O)OC)[C@

)][C@@H](COC(=O)/C=C/c3ccc(c(c3)OC)O)O[C@H]([C@@H]2O)OCCc2ccc(c(c2)O)O)[C@@  
O)[C@H]([C@H]([C@@H]1O)O)[C@@H]1O[C@H](CO)[C@H]([C@@H]([C@H]1O)O)O)O

@H]1C(OC=C2)O[C@@H]1O[C@H](COC(=O)c2ccc(c(c2)OC)O)[C@H]([C@@H]([C@H]1C  
C2[C@@]2(CO)O)[C@H]2[C@H]3OC(=O)c2ccccc2)[C@@H]([C@H]([C@@H]1O)O)O

3c(c2)[C@@H](CO)[C@@H](O3)c2cc(OC)c(c(c2)OC)OC)[C@@H]([C@H]([C@@H]1O)O)O  
=O)C)c3c(c2)[C@@H](CO)[C@@H](O3)c2cc(OC)c(c(c2)OC)OC)[C@@H]([C@H]([C@@H]1C  
C/C=C/c2cc(OC)c3c(c2)[C@@H](CO)[C@@H](O3)c2cc(OC)c(c(c2)OC)OC)[C@@H]([C@H]  
C/C=C/c2cc(OC)c3c(c2)[C@@H](COC(=O)C)[C@@H](O3)c2cc(OC)c(c(c2)OC)OC)[C@@H]  
C/C=C/c2cc(OC)c3c(c2)[C@@H](CO)[C@@H](O3)c2ccc(c(c2)OC)O)[C@@H]([C@H]([C@@

› @H]1O)O)O)c1c(O)c([C@ @H]2OC[C@ @H]([C@ @H]([C@H]2O)O)O)c(c2c1oc(cc2=O)c1cc  
› @H]1O)O)O)c1c(O)c([C@ @H]2OC[C@ @H]([C@ @H]([C@H]2O)O)O)c2c(c1O)c(=O)cc(o2)c



OC)[C@@H]([C@H]([C@@H]1OC(=O)/C=C/c1ccc(c(c1)O)OC)O[C@@H]1O[C@H](C)[C@H]  
[C@H]1O)O)c1c(O)c([C@@H]2OC[C@@H]([C@@H]([C@H]2O)O)O)c2c1oc(cc2=O)c1ccc

[C@H](CO[C@@H]3OC[C@H]([C@@H]([C@H]3O)O)O)[C@H]([C@@H]([C@H]1O)O)O)c(=O)c

[C@H]1O)O)c1c(O)c([C@@H]2OC[C@@H]([C@@H]([C@H]2O)O)O)c2c(c1O)c(=O)cc(o2)c

CH(CO[C@@H]3OC[C@H]([C@@H]([C@H]3O)O)O)[C@H]([C@@H]([C@H]1O)O)O)c(=O)c  
[C@@H]3OC[C@H]([C@@H]([C@H]3O)O)O)[C@H]([C@@H]([C@H]2O)O)O)c2c(c1OC)oc1c(c2=O)

3CC3(C2CCC3C(C2CCC(C(O2)OC2OC(C)C(C(C2O)O)O)C)C)C)C(C(C1O)O)OC1OC(C)C(

:C1OC(CC1OP(=O)(OCC1OC(CC1OP(=O)(OCC1OC(CC1OP(=O)(OCC1OC(CC1OP(=O)(OC

[[C@@H]3[C@@H]2C(=CC3)COC(=O)C)C(=O)OC][C@@H]([C@H]([C@@H]1O)O)O  
3[C@@H]4[C@H]2C(=C[C@@H]4OC3=O)COC(=O)C)[C@@H]([C@H]([C@@H]1O)O)O  
C2C(=O)OC)O[C@@H]1O[C@H](CO[C@@H]2O[C@H](COC(=O)/C=C\c3ccc(cc3)O)[C@H]([  
2H])(OC(=O)/C(=C/C=C/C(=C/C=C/C(=C/C=C/C(=O)O)[C@@H]3O[C@H](CO[C@@H]4C

:c(c2)O)O)C[C@](C[C@H]1OC(=O)CC(CC(=O)O)(O)C(=O)O)/C=C/c1ccc(c(c1)O)O  
:O)CC(CC(=O)O)(O)C)OC(=O)/C=C/c1ccc(c(c1)O)O)C(=O)O)/C=C/c1ccc(c(c1)O)O

H]3[C@H]2[C@@]2(CO)O[C@H]2C3)C(=O)OC][C@@H]([C@H]([C@@H]1O)O)O

!([C@]1(C)CC[C@@]13[C@H]2CC[C@@H]2[C@]3(C1)CC[C@@H]([C@@]2(C)C(=O)O)O)C  
[[C@@H]3[C@H]2[C@](O)(CO)C=C3)C(=O)OC][C@@H]([C@H]([C@@H]1O)O)O

:C2C(=O)OC)O[C@@H]1O[C@H](CO[C@@H]2O[C@H](CO)[C@H]([C@@H]([C@@H]2O)

:(COC(=O)CCCCCCC/C=C\C/C=C\CCCCC)COC(=O)CCCCCCC/C=C\C/C=C\CCCCC

]C[C@@]1([C@@H]2CC=C2[C@@]1(C)CC[C@@]1([C@H]2CC(CC1)(C)C)C(=O)O)C)O[C  
]C[C@@]1([C@@H]2CC=C2[C@@]1(C)CC[C@@]1([C@H]2CC(CC1)(C)C)C(=O)O)C)O[C  
2]1(C)CC[C@@]13[C@@H]2CC[C@@H]2[C@]3(C1)CC[C@@H]([C@@]2(C)C(=O)O)O)C)C  
2]3(C)CC[C@@H]3[C@]4(C)CC[C@@H](C3(C)C)O)[C@@H]2CC(C[C@@H]1O)(C)C

!H](C)[C@@H]([C@H]([C@@H]3O)O)O)cc(c2c(=O)c1O[C@@H]1O[C@@H](C)[C@@H]([C@

2H](OC(=O)[C@@]34CCC(=C)CC4C4=CCC5[C@@]([C@@]4(CC3C)(C)CCC3[C@]5(C)C[C

3C[C@@]1([C@@H]2CC=C2[C@@]1(C)CC[C@@]1([C@H]2CC(CC1)(C)C)C(=O)O)C)O[C  
2([C@]1(C)CC[C@@]13[C@H]2CC[C@@H]2[C@]3(C1)C(=O)C[C@@H]([C@@]2(C)C(=O)C

]1(C)CC[C@@]13[C@@H]2CC[C@@H]2[C@]3(C1)[C@@H](O)C[C@@H](C2(C)C)O)C)C/C

(=C/C=C/C=C(/C=C/C=C(/C(=O)OC3OC(COC4OC(CO)C(C(C4O)O)O)C(C(C3O)O)O)\C)\C/C

:(=C/C=C/C=C(/C=C/C=C(/C(=O)OC3OC(CO)C(C(C3O)O)O)\C)\C)/C)/C)C(C(C2O)O)O)C(C(C  
:(=C/C=C/C=C(\C=C\C=C(/C(=O)OC3OC(COC4OC(CO)C(C(C4O)O)O)C(C(C3O)O)O)\C)/C)/C



























0)C)C)[C@@H]([C@H]([C@@H]1O)O)O[C@@H]1O[C@H](CO)[C@H]([C@@H]([C@@H]1C  
O[C@H](C(=O)O)[C@H]([C@@H]([C@H]2O[C@@H]2O[C@H](CO)[C@H]([C@@H]([C@@H]

ÞH]([C@H]([C@@H]1O)O)O[C@@H]1O[C@H](CO)[C@H]([C@@H]([C@@H]1O)O)O













:@H]([C@@H]([C@@]3(C)CO)O)O)[C@@H]([C@H]([C@@H]2O)O)O)[C@@H]([C@H]([C@  
)@H]1OC[C@@H]([C@@H]([C@H]1O[C@@H]1O[C@@H](C)[C@@H]([C@H]([C@H]1O)









































ncnc2N)O)n1ccc(nc1=O)N)O)n1ccc(nc1=O)N)O)n1ccc(nc1=O)N)O)n1cnc2c1ncnc2N)O)n1cni











































c2c1ncnc2N)O)n1ccc(nc1=O)N)O)n1cnc2c1ncnc2N)O)COP(=O)(OC1CC(OC1COP(=O)(OC1C













































CC(OC1COP(=O)(OC1CC(OC1COP(=O)(OC1CC(OC1COP(=O)(OC1CC(OC1COP(=O)(OC1C











































C(OC1COP(=O)(OC1CC(OC1COP(=O)(OC1CC(OC1COP(=O)(O)O)n1ccc(nc1=O)N)O)n1cn













































c2c1nc(N)[nH]c2=O)n1cnc2c1nc(N)[nH]c2=O)n1ccc(nc1=O)N)O)n1cc(C)c(=O)[nH]c1=O)
