# Supplementary material for: [Retracted] In Silico Identification and Mechanism Exploration of Active Ingredients against Stroke from An‐Gong‐Niu‐Huang‐Wan (AGNHW) Formula
Source: Hindawi journal article supplement (doi:10.1155/2022/5218993), 2022-01-01
Supplement: f2 [file 5218993.f2.pdf]

| <b>Gene entrez Id</b> | <b>Gene Symbol</b> |
|-----------------------|--------------------|
| 2833                  | CXCR3              |
| 6647                  | SOD1               |
| 10019                 | SH2B3              |
| 213                   | ALB                |
| 2243                  | FGA                |
| 7040                  | TGFB1              |
| 28                    | ABO                |
| 335                   | APOA1              |
| 1906                  | EDN1               |
| 4321                  | MMP12              |
| 3383                  | ICAM1              |
| 7351                  | UCP2               |
| 4843                  | NOS2               |
| 5308                  | PITX2              |
| 79001                 | VKORC1             |
| 3674                  | ITGA2B             |
| 7941                  | PLA2G7             |
| 3553                  | IL1B               |
| 5327                  | PLAT               |
| 1636                  | ACE                |
| 3569                  | IL6                |
| 3690                  | ITGB3              |
| 7124                  | TNF                |
| 3557                  | IL1RN              |
| 2147                  | F2                 |
| 5144                  | PDE4D              |
| 5743                  | PTGS2              |
| 463                   | ZFHX3              |
| 2153                  | F5                 |
| 4524                  | MTHFR              |
| 4018                  | LPA                |
| 9734                  | HDAC9              |
| 12                    | SERPINA3           |
| 19                    | ABCA1              |
| 118                   | ADD1               |
| 125                   | ADH1B              |
| 153                   | ADRB1              |
| 154                   | ADRB2              |
| 183                   | AGT                |
| 185                   | AGTR1              |
| 187                   | APLNR              |
| 217                   | ALDH2              |
| 240                   | ALOX5              |
| 241                   | ALOX5AP            |
| 328                   | APEX1              |
| 338                   | APOB               |
| 345                   | APOC3              |
| 350                   | APOH               |
| 462                   | SERPINC1           |
| 627                   | BDNF               |
| 635                   | BHMT               |
| 718                   | C3                 |
| 727                   | C5                 |
| 875                   | CBS                |
| 929                   | CD14               |
| 958                   | CD40               |
| 1029                  | CDKN2A             |

|      |          |
|------|----------|
| 1030 | CDKN2B   |
| 1071 | CETP     |
| 1234 | CCR5     |
| 1312 | COMT     |
| 1351 | COX8A    |
| 1361 | CPB2     |
| 1401 | CRP      |
| 1493 | CTLA4    |
| 1524 | CX3CR1   |
| 1535 | CYBA     |
| 1543 | CYP1A1   |
| 1557 | CYP2C19  |
| 1558 | CYP2C8   |
| 1559 | CYP2C9   |
| 1573 | CYP2J2   |
| 1576 | CYP3A4   |
| 1577 | CYP3A5   |
| 1579 | CYP4A11  |
| 1585 | CYP11B2  |
| 1628 | DBP      |
| 1909 | EDNRA    |
| 1910 | EDNRB    |
| 2022 | ENG      |
| 2053 | EPHX2    |
| 2099 | ESR1     |
| 2100 | ESR2     |
| 2155 | F7       |
| 2157 | F8       |
| 2161 | F12      |
| 2162 | F13A1    |
| 2165 | F13B     |
| 2169 | FABP2    |
| 2206 | MS4A2    |
| 2212 | FCGR2A   |
| 2244 | FGB      |
| 2266 | FGG      |
| 2328 | FMO3     |
| 2346 | FOLH1    |
| 2539 | G6PD     |
| 2621 | GAS6     |
| 2677 | GGCX     |
| 2688 | GH1      |
| 2701 | GJA4     |
| 2717 | GLA      |
| 2784 | GNB3     |
| 2811 | GP1BA    |
| 2876 | GPX1     |
| 2878 | GPX3     |
| 2944 | GSTM1    |
| 2952 | GSTT1    |
| 3026 | HABP2    |
| 3039 | HBA1     |
| 3043 | HBB      |
| 3077 | HFE      |
| 3091 | HIF1A    |
| 3119 | HLA-DQB1 |
| 3123 | HLA-DRB1 |
| 3156 | HMGCR    |

|      |           |
|------|-----------|
| 3162 | HMOX1     |
| 3240 | HP        |
| 3303 | HSPA1A    |
| 3304 | HSPA1B    |
| 3305 | HSPA1L    |
| 3356 | HTR2A     |
| 3479 | IGF1      |
| 3552 | IL1A      |
| 3565 | IL4       |
| 3566 | IL4R      |
| 3568 | IL5RA     |
| 3570 | IL6R      |
| 3576 | IL8       |
| 3578 | IL9       |
| 3586 | IL10      |
| 3606 | IL18      |
| 3613 | IMPA2     |
| 3630 | INS       |
| 3673 | ITGA2     |
| 3688 | ITGB1     |
| 3689 | ITGB2     |
| 3791 | KDR       |
| 3949 | LDLR      |
| 3957 | LGALS2    |
| 3990 | LIPC      |
| 3993 | LLGL2     |
| 4023 | LPL       |
| 4048 | LTA4H     |
| 4049 | LTA       |
| 4056 | LTC4S     |
| 4256 | MGP       |
| 4312 | MMP1      |
| 4313 | MMP2      |
| 4314 | MMP3      |
| 4318 | MMP9      |
| 4353 | MPO       |
| 4512 | COX1      |
| 4513 | COX2      |
| 4548 | MTR       |
| 4552 | MTRR      |
| 4815 | NINJ2     |
| 4842 | NOS1      |
| 4846 | NOS3      |
| 4852 | NPY       |
| 4854 | NOTCH3    |
| 4878 | NPPA      |
| 4883 | NPR3      |
| 4973 | OLR1      |
| 4982 | TNFRSF11B |
| 5028 | P2RY1     |
| 5054 | SERPINE1  |
| 5175 | PECAM1    |
| 5243 | ABCB1     |
| 5265 | SERPINA1  |
| 5340 | PLG       |
| 5444 | PON1      |
| 5445 | PON2      |
| 5465 | PPARA     |

|        |          |
|--------|----------|
| 5467   | PPARD    |
| 5468   | PPARG    |
| 5583   | PRKCH    |
| 5624   | PROC     |
| 5687   | PSMA6    |
| 5740   | PTGIS    |
| 5742   | PTGS1    |
| 5972   | REN      |
| 6288   | SAA1     |
| 6347   | CCL2     |
| 6352   | CCL5     |
| 6356   | CCL11    |
| 6387   | CXCL12   |
| 6401   | SELE     |
| 6403   | SELP     |
| 6404   | SELPLG   |
| 6532   | SLC6A4   |
| 6648   | SOD2     |
| 6696   | SPP1     |
| 6915   | TBXA2R   |
| 6916   | TBXAS1   |
| 6927   | HNF1A    |
| 6934   | TCF7L2   |
| 6948   | TCN2     |
| 7015   | TERT     |
| 7018   | TF       |
| 7035   | TFPI     |
| 7056   | THBD     |
| 7097   | TLR2     |
| 7099   | TLR4     |
| 7157   | TP53     |
| 7292   | TNFSF4   |
| 7356   | SCGB1A1  |
| 7412   | VCAM1    |
| 7421   | VDR      |
| 7422   | VEGFA    |
| 7432   | VIP      |
| 7450   | VWF      |
| 7515   | XRCC1    |
| 8529   | CYP4F2   |
| 8858   | PROZ     |
| 8997   | KALRN    |
| 9365   | KL       |
| 9370   | ADIPOQ   |
| 9620   | CELSR1   |
| 9639   | ARHGEF10 |
| 10544  | PROCR    |
| 10856  | RUVBL2   |
| 11093  | ADAMTS13 |
| 51206  | GP6      |
| 55328  | RNLS     |
| 56729  | RETN     |
| 57674  | RNF213   |
| 59272  | ACE2     |
| 64805  | P2RY12   |
| 80310  | PDGFD    |
| 89822  | KCNK17   |
| 116519 | APOA5    |

|           |                        |
|-----------|------------------------|
| 121278    | TPH2                   |
| 221458    | KIF6                   |
| 255738    | PCSK9                  |
| 406938    | MIR146A                |
| 406941    | MIR149                 |
| 406973    | MIR196A2               |
| 729230    | CCR2                   |
| 100048912 | CDKN2B-AS1             |
| 55829     | SELS                   |
| 4638      | MYLK                   |
| 51422     | PRKAG2                 |
| 101927558 | LOC101927558           |
| 100861552 | LINC00558-LOC105370211 |
| 202       | AIM1                   |
