# Supplementary material for: [Retracted] In Silico Identification and Mechanism Exploration of Active Ingredients against Stroke from An‐Gong‐Niu‐Huang‐Wan (AGNHW) Formula
Source: Hindawi journal article supplement (doi:10.1155/2022/5218993), 2022-01-01
Supplement: f3 [file 5218993.f3.pdf]

| CID        | Target  | Type      |
|------------|---------|-----------|
| CID10586   | PTPN1   | predicted |
| CID10586   | LMNA    | predicted |
| CID10586   | CYP3A4  | predicted |
| CID10586   | MAPT    | predicted |
| CID10586   | TSHR    | predicted |
| CID10586   | ACHE    | predicted |
| CID10586   | KMT2A   | predicted |
| CID10586   | ALOX15  | predicted |
| CID10586   | ALDH1A1 | predicted |
| CID10586   | SMN1    | predicted |
| CID10586   | CNR2    | predicted |
| CID10586   | CYP19A1 | predicted |
| CID10586   | CNR1    | predicted |
| CID10586   | BCHE    | predicted |
| CID10586   | MAPK1   | predicted |
| CID10586   | ALOX5   | predicted |
| CID10586   | TDP1    | predicted |
| CID10586   | RAB9A   | predicted |
| CID10586   | NPC1    | predicted |
| CID10586   | TP53    | predicted |
| CID220774  | PTPN1   | predicted |
| CID220774  | LMNA    | predicted |
| CID220774  | GPBAR1  | predicted |
| CID220774  | HSD11B1 | predicted |
| CID220774  | TSHR    | predicted |
| CID220774  | MAPT    | predicted |
| CID220774  | CYP3A4  | predicted |
| CID220774  | AKR1B10 | predicted |
| CID220774  | SMN1    | predicted |
| CID220774  | TNF     | predicted |
| CID220774  | RAB9A   | predicted |
| CID220774  | PTPN2   | predicted |
| CID220774  | SHBG    | predicted |
| CID220774  | CYP19A1 | predicted |
| CID220774  | SLCO1B3 | predicted |
| CID220774  | TDP1    | predicted |
| CID220774  | SLCO1B1 | predicted |
| CID220774  | NPC1    | predicted |
| CID220774  | NPSR1   | predicted |
| CID220774  | KMT2A   | predicted |
| CID5352437 | PTPN1   | predicted |
| CID5352437 | LMNA    | predicted |
| CID5352437 | TSHR    | predicted |
| CID5352437 | ACHE    | predicted |
| CID5352437 | ALDH1A1 | predicted |
| CID5352437 | MAPT    | predicted |
| CID5352437 | ALOX15  | predicted |
| CID5352437 | CYP3A4  | predicted |
| CID5352437 | ALOX5   | predicted |
| CID5352437 | KMT2A   | predicted |
| CID5352437 | PPARG   | predicted |
| CID5352437 | CNR2    | predicted |
| CID5352437 | BCHE    | predicted |
| CID5352437 | TP53    | predicted |
| CID5352437 | MAPK1   | predicted |
| CID5352437 | TDP1    | predicted |
| CID5352437 | CNR1    | predicted |

|             |         |           |
|-------------|---------|-----------|
| CID5352437  | SMN1    | predicted |
| CID5352437  | PPARA   | predicted |
| CID5352437  | ABCG2   | predicted |
| CID161557   | CYP19A1 | predicted |
| CID161557   | CYP3A4  | predicted |
| CID161557   | MAPT    | predicted |
| CID161557   | ABCG2   | predicted |
| CID161557   | BACE1   | predicted |
| CID161557   | LMNA    | predicted |
| CID161557   | TDP1    | predicted |
| CID161557   | MAPK1   | predicted |
| CID161557   | POLB    | predicted |
| CID161557   | KDM4E   | predicted |
| CID161557   | MAOA    | predicted |
| CID161557   | RAB9A   | predicted |
| CID161557   | NPC1    | predicted |
| CID161557   | KMT2A   | predicted |
| CID161557   | APEX1   | predicted |
| CID161557   | PTPN1   | predicted |
| CID161557   | ACHE    | predicted |
| CID161557   | SMN1    | predicted |
| CID161557   | ALOX15  | predicted |
| CID161557   | GAA     | predicted |
| CID442180   | CYP3A4  | predicted |
| CID442180   | MAPT    | predicted |
| CID442180   | LMNA    | predicted |
| CID442180   | ACHE    | predicted |
| CID442180   | SMN1    | predicted |
| CID442180   | F3      | predicted |
| CID442180   | CYP19A1 | predicted |
| CID442180   | CYP2C19 | predicted |
| CID442180   | NPC1    | predicted |
| CID442180   | RAB9A   | predicted |
| CID442180   | DRD1    | predicted |
| CID442180   | TDP1    | predicted |
| CID442180   | ABCG2   | predicted |
| CID442180   | TP53    | predicted |
| CID442180   | CYP2D6  | predicted |
| CID442180   | TSHR    | predicted |
| CID442180   | KDM4E   | predicted |
| CID442180   | MAPK1   | predicted |
| CID442180   | ALDH1A1 | predicted |
| CID442180   | HIF1A   | predicted |
| CID21139765 | PTPN1   | predicted |
| CID21139765 | LMNA    | predicted |
| CID21139765 | GPBAR1  | predicted |
| CID21139765 | MAPT    | predicted |
| CID21139765 | TSHR    | predicted |
| CID21139765 | RAB9A   | predicted |
| CID21139765 | CYP3A4  | predicted |
| CID21139765 | HSD11B1 | predicted |
| CID21139765 | SHBG    | predicted |
| CID21139765 | NPC1    | predicted |
| CID21139765 | TDP1    | predicted |
| CID21139765 | SMN1    | predicted |
| CID21139765 | CYP19A1 | predicted |
| CID21139765 | SLCO1B1 | predicted |
| CID21139765 | SLCO1B3 | predicted |

|             |         |           |
|-------------|---------|-----------|
| CID21139765 | TP53    | predicted |
| CID21139765 | TNF     | predicted |
| CID21139765 | AKR1B10 | predicted |
| CID21139765 | MAPK1   | predicted |
| CID21139765 | ALDH1A1 | predicted |
| CID20055073 | CYP3A4  | predicted |
| CID20055073 | MAPT    | predicted |
| CID20055073 | LMNA    | predicted |
| CID20055073 | ACHE    | predicted |
| CID20055073 | SMN1    | predicted |
| CID20055073 | F3      | predicted |
| CID20055073 | CYP2C19 | predicted |
| CID20055073 | NPC1    | predicted |
| CID20055073 | RAB9A   | predicted |
| CID20055073 | TP53    | predicted |
| CID20055073 | CYP2D6  | predicted |
| CID20055073 | DRD1    | predicted |
| CID20055073 | TDP1    | predicted |
| CID20055073 | ALDH1A1 | predicted |
| CID20055073 | KDM4E   | predicted |
| CID20055073 | UBE2I   | predicted |
| CID20055073 | ABCG2   | predicted |
| CID20055073 | MAPK1   | predicted |
| CID20055073 | GAA     | predicted |
| CID20055073 | TSHR    | predicted |
| CID147329   | CYP3A4  | predicted |
| CID147329   | MAPT    | predicted |
| CID147329   | LMNA    | predicted |
| CID147329   | ACHE    | predicted |
| CID147329   | SMN1    | predicted |
| CID147329   | F3      | predicted |
| CID147329   | CYP2C19 | predicted |
| CID147329   | DRD1    | predicted |
| CID147329   | NPC1    | predicted |
| CID147329   | RAB9A   | predicted |
| CID147329   | CYP2D6  | predicted |
| CID147329   | TP53    | predicted |
| CID147329   | TDP1    | predicted |
| CID147329   | ALDH1A1 | predicted |
| CID147329   | KDM4E   | predicted |
| CID147329   | UBE2I   | predicted |
| CID147329   | TSHR    | predicted |
| CID147329   | GAA     | predicted |
| CID147329   | MAPK1   | predicted |
| CID147329   | ABCG2   | predicted |
| CID5645     | PTPN1   | predicted |
| CID5645     | LMNA    | predicted |
| CID5645     | GPBAR1  | predicted |
| CID5645     | TSHR    | predicted |
| CID5645     | MAPT    | predicted |
| CID5645     | HSD11B1 | predicted |
| CID5645     | CYP3A4  | predicted |
| CID5645     | HMGCR   | predicted |
| CID5645     | RAB9A   | predicted |
| CID5645     | SMN1    | predicted |
| CID5645     | SHBG    | predicted |
| CID5645     | TDP1    | predicted |
| CID5645     | AKR1B10 | predicted |

|            |         |           |
|------------|---------|-----------|
| CID5645    | CYP19A1 | predicted |
| CID5645    | PPARG   | predicted |
| CID5645    | NPC1    | predicted |
| CID5645    | TNF     | predicted |
| CID5645    | SLCO1B3 | predicted |
| CID5645    | SLCO1B1 | predicted |
| CID5645    | NPSR1   | predicted |
| CID3251    | HTR2C   | predicted |
| CID3251    | HTR2B   | predicted |
| CID3251    | LMNA    | predicted |
| CID3251    | HTR2A   | predicted |
| CID3251    | CYP3A4  | predicted |
| CID3251    | KMT2A   | predicted |
| CID3251    | SMN1    | predicted |
| CID3251    | MAPT    | predicted |
| CID3251    | CYP2D6  | predicted |
| CID3251    | TSHR    | predicted |
| CID3251    | HTR1A   | predicted |
| CID3251    | MAOA    | predicted |
| CID3251    | TBXAS1  | predicted |
| CID3251    | HTR5A   | predicted |
| CID3251    | CHRM3   | predicted |
| CID3251    | HIF1A   | predicted |
| CID3251    | TACR1   | predicted |
| CID3251    | ALDH1A1 | predicted |
| CID3251    | CNR2    | predicted |
| CID3251    | CNR1    | predicted |
| CID23345   | TSHR    | predicted |
| CID23345   | TAAR1   | predicted |
| CID23345   | CYP1A2  | predicted |
| CID23345   | LMNA    | predicted |
| CID23345   | PDXK    | predicted |
| CID23345   | MAPT    | predicted |
| CID23345   | TP53    | predicted |
| CID23345   | MAOA    | predicted |
| CID23345   | RAB9A   | predicted |
| CID23345   | KMT2A   | predicted |
| CID23345   | IDO1    | predicted |
| CID23345   | CYP2A6  | predicted |
| CID23345   | ALDH1A1 | predicted |
| CID23345   | NPC1    | predicted |
| CID23345   | ACHE    | predicted |
| CID23345   | CYP3A4  | predicted |
| CID23345   | CTSB    | predicted |
| CID23345   | GSG2    | predicted |
| CID23345   | HPGD    | predicted |
| CID23345   | KDM4E   | predicted |
| CID5316214 | ACHE    | predicted |
| CID5316214 | LMNA    | predicted |
| CID5316214 | MAPT    | predicted |
| CID5316214 | CYP3A4  | predicted |
| CID5316214 | TSHR    | predicted |
| CID5316214 | CYP2A6  | predicted |
| CID5316214 | PTPN1   | predicted |
| CID5316214 | CNR1    | predicted |
| CID5316214 | CNR2    | predicted |
| CID5316214 | CYP19A1 | predicted |
| CID5316214 | SMN1    | predicted |

|              |          |           |
|--------------|----------|-----------|
| CID5316214   | ALDH1A1  | predicted |
| CID5316214   | TDP1     | predicted |
| CID5316214   | KMT2A    | predicted |
| CID5316214   | ODC1     | predicted |
| CID5316214   | RAB9A    | predicted |
| CID5316214   | MAPK1    | predicted |
| CID5316214   | PPARG    | predicted |
| CID5316214   | NPC1     | predicted |
| CID5316214   | TP53     | predicted |
| CID61262     | LMNA     | predicted |
| CID61262     | TSHR     | predicted |
| CID61262     | PTPN1    | predicted |
| CID61262     | CYP3A4   | predicted |
| CID61262     | MAPT     | predicted |
| CID61262     | SMN1     | predicted |
| CID61262     | RAB9A    | predicted |
| CID61262     | ALDH1A1  | predicted |
| CID61262     | TP53     | predicted |
| CID61262     | TDP1     | predicted |
| CID61262     | KMT2A    | predicted |
| CID61262     | NPC1     | predicted |
| CID61262     | MAPK1    | predicted |
| CID61262     | SLCO1B3  | predicted |
| CID61262     | SLCO1B1  | predicted |
| CID61262     | CYP19A1  | predicted |
| CID61262     | AKR1B10  | predicted |
| CID61262     | ALOX15   | predicted |
| CID61262     | ACHE     | predicted |
| CID61262     | HSD11B1  | predicted |
| CID101609122 | LMNA     | predicted |
| CID101609122 | CYP3A4   | predicted |
| CID101609122 | MAPT     | predicted |
| CID101609122 | AKR1B1   | predicted |
| CID101609122 | TDP1     | predicted |
| CID101609122 | RAB9A    | predicted |
| CID101609122 | TSHR     | predicted |
| CID101609122 | SMN1     | predicted |
| CID101609122 | HSP90AA1 | predicted |
| CID101609122 | NPC1     | predicted |
| CID101609122 | IL2      | predicted |
| CID101609122 | ALDH1A1  | predicted |
| CID101609122 | POLB     | predicted |
| CID101609122 | TP53     | predicted |
| CID101609122 | KMT2A    | predicted |
| CID101609122 | L3MBTL1  | predicted |
| CID101609122 | APEX1    | predicted |
| CID101609122 | CA9      | predicted |
| CID101609122 | CA1      | predicted |
| CID101609122 | CYP19A1  | predicted |
| CID123701    | TSHR     | predicted |
| CID123701    | LMNA     | predicted |
| CID123701    | BBOX1    | predicted |
| CID123701    | CYP3A4   | predicted |
| CID123701    | CHRFAM7A | predicted |
| CID123701    | CHRN2    | predicted |
| CID123701    | HMGCR    | predicted |
| CID123701    | FAAH     | predicted |
| CID123701    | MAPT     | predicted |

|             |         |           |
|-------------|---------|-----------|
| CID123701   | SMN1    | predicted |
| CID123701   | NR4A1   | predicted |
| CID123701   | ACHE    | predicted |
| CID123701   | CYP2D6  | predicted |
| CID123701   | MPEG1   | predicted |
| CID123701   | PPARG   | predicted |
| CID123701   | TRPV1   | predicted |
| CID123701   | ALDH1A1 | predicted |
| CID123701   | TDP1    | predicted |
| CID123701   | CNR1    | predicted |
| CID123701   | FABP3   | predicted |
| CID4546425  | CYP3A4  | predicted |
| CID4546425  | MAPT    | predicted |
| CID4546425  | CYP19A1 | predicted |
| CID4546425  | LMNA    | predicted |
| CID4546425  | BACE1   | predicted |
| CID4546425  | TDP1    | predicted |
| CID4546425  | ABCG2   | predicted |
| CID4546425  | SLCO2B1 | predicted |
| CID4546425  | PTPN1   | predicted |
| CID4546425  | POLB    | predicted |
| CID4546425  | APEX1   | predicted |
| CID4546425  | ALDH1A1 | predicted |
| CID4546425  | RAB9A   | predicted |
| CID4546425  | SMN1    | predicted |
| CID4546425  | TSHR    | predicted |
| CID4546425  | CYP1B1  | predicted |
| CID4546425  | ALOX15  | predicted |
| CID4546425  | MAPK1   | predicted |
| CID4546425  | ACHE    | predicted |
| CID4546425  | NPC1    | predicted |
| CID14825644 | CYP3A4  | predicted |
| CID14825644 | MAPT    | predicted |
| CID14825644 | ABCG2   | predicted |
| CID14825644 | ALDH1A1 | predicted |
| CID14825644 | LMNA    | predicted |
| CID14825644 | TSHR    | predicted |
| CID14825644 | CA9     | predicted |
| CID14825644 | RAB9A   | predicted |
| CID14825644 | KDM4E   | predicted |
| CID14825644 | NPC1    | predicted |
| CID14825644 | TP53    | predicted |
| CID14825644 | CA12    | predicted |
| CID14825644 | MAOA    | predicted |
| CID14825644 | BACE1   | predicted |
| CID14825644 | CYP19A1 | predicted |
| CID14825644 | CA1     | predicted |
| CID14825644 | KMT2A   | predicted |
| CID14825644 | TDP1    | predicted |
| CID14825644 | SMN1    | predicted |
| CID14825644 | CA13    | predicted |
| CID5321864  | MAPT    | predicted |
| CID5321864  | MAOA    | predicted |
| CID5321864  | CYP3A4  | predicted |
| CID5321864  | ABCG2   | predicted |
| CID5321864  | CYP19A1 | predicted |
| CID5321864  | RAB9A   | predicted |
| CID5321864  | NPC1    | predicted |

|            |          |           |
|------------|----------|-----------|
| CID5321864 | KMT2A    | predicted |
| CID5321864 | BACE1    | predicted |
| CID5321864 | ABCB1    | predicted |
| CID5321864 | ALDH1A1  | predicted |
| CID5321864 | MAPK1    | predicted |
| CID5321864 | KDM4E    | predicted |
| CID5321864 | HPGD     | predicted |
| CID5321864 | TDP1     | predicted |
| CID5321864 | TP53     | predicted |
| CID5321864 | ACHE     | predicted |
| CID5321864 | PTPN1    | predicted |
| CID5321864 | ALOX15   | predicted |
| CID5321864 | LMNA     | predicted |
| CID5322074 | CYP19A1  | predicted |
| CID5322074 | CYP3A4   | predicted |
| CID5322074 | MAPT     | predicted |
| CID5322074 | ABCG2    | predicted |
| CID5322074 | BACE1    | predicted |
| CID5322074 | RAB9A    | predicted |
| CID5322074 | TDP1     | predicted |
| CID5322074 | LMNA     | predicted |
| CID5322074 | KDM4E    | predicted |
| CID5322074 | NPC1     | predicted |
| CID5322074 | MAPK1    | predicted |
| CID5322074 | MAOA     | predicted |
| CID5322074 | ALDH1A1  | predicted |
| CID5322074 | KMT2A    | predicted |
| CID5322074 | ESR1     | predicted |
| CID5322074 | ACHE     | predicted |
| CID5322074 | ESR2     | predicted |
| CID5322074 | CYP2C19  | predicted |
| CID5322074 | PPARG    | predicted |
| CID5322074 | POLB     | predicted |
| CID188316  | MAPT     | predicted |
| CID188316  | CYP3A4   | predicted |
| CID188316  | ABCG2    | predicted |
| CID188316  | RAB9A    | predicted |
| CID188316  | MAOA     | predicted |
| CID188316  | ABCB1    | predicted |
| CID188316  | NPC1     | predicted |
| CID188316  | BACE1    | predicted |
| CID188316  | ALDH1A1  | predicted |
| CID188316  | CYP19A1  | predicted |
| CID188316  | KMT2A    | predicted |
| CID188316  | TDP1     | predicted |
| CID188316  | KDM4E    | predicted |
| CID188316  | LMNA     | predicted |
| CID188316  | TP53     | predicted |
| CID188316  | MAPK1    | predicted |
| CID188316  | CTSV     | predicted |
| CID188316  | CYP2C19  | predicted |
| CID188316  | TSHR     | predicted |
| CID188316  | ACHE     | predicted |
| CID5322064 | CYP2D6   | predicted |
| CID5322064 | MAPT     | predicted |
| CID5322064 | TP53     | predicted |
| CID5322064 | HSD17B10 | predicted |
| CID5322064 | HPGD     | predicted |

|            |         |           |
|------------|---------|-----------|
| CID5322064 | LMNA    | predicted |
| CID5322064 | PARP1   | predicted |
| CID5322064 | TSHR    | predicted |
| CID5322064 | HIF1A   | predicted |
| CID5322064 | ALDH1A1 | predicted |
| CID5322064 | THPO    | predicted |
| CID5322064 | ALOX15  | predicted |
| CID5322064 | SMN1    | predicted |
| CID5322064 | MAPK1   | predicted |
| CID5322064 | NFKB1   | predicted |
| CID5322064 | KMT2A   | predicted |
| CID5322064 | CYP1A1  | predicted |
| CID5322064 | CYP1B1  | predicted |
| CID5322064 | GBA     | predicted |
| CID5322064 | CYP2B6  | predicted |
| CID5322064 | CYP2C19 | Known     |
| CID5322064 | CYP2C9  | Known     |
| CID5322064 | CYP3A4  | Known     |
| CID280225  | DRD1    | predicted |
| CID280225  | CYP3A4  | predicted |
| CID280225  | F3      | predicted |
| CID280225  | CYP2D6  | predicted |
| CID280225  | MAPT    | predicted |
| CID280225  | DRD2    | predicted |
| CID280225  | LMNA    | predicted |
| CID280225  | ACHE    | predicted |
| CID280225  | ALDH1A1 | predicted |
| CID280225  | MAOA    | predicted |
| CID280225  | CYP2C19 | predicted |
| CID280225  | TSHR    | predicted |
| CID280225  | TDP1    | predicted |
| CID280225  | TAAR1   | predicted |
| CID280225  | HTR1A   | predicted |
| CID280225  | MAOB    | predicted |
| CID280225  | NPC1    | predicted |
| CID280225  | RAB9A   | predicted |
| CID280225  | MAPK1   | predicted |
| CID280225  | KDM4E   | predicted |
| CID79035   | NR1H3   | predicted |
| CID79035   | PTPN1   | predicted |
| CID79035   | PRKCD   | predicted |
| CID79035   | GPBAR1  | predicted |
| CID79035   | MAPT    | predicted |
| CID79035   | LMNA    | predicted |
| CID79035   | XBP1    | predicted |
| CID79035   | TSHR    | predicted |
| CID79035   | HSD11B1 | predicted |
| CID79035   | SHBG    | predicted |
| CID79035   | PRKCA   | predicted |
| CID79035   | ESR1    | predicted |
| CID79035   | CYP3A4  | predicted |
| CID79035   | RAB9A   | predicted |
| CID79035   | TNF     | predicted |
| CID79035   | CYP19A1 | predicted |
| CID79035   | SLCO1B3 | predicted |
| CID79035   | SLCO1B1 | predicted |
| CID79035   | SMN1    | predicted |
| CID79035   | NPC1    | predicted |



|             |          |           |
|-------------|----------|-----------|
| CID45934475 | MAPT     | predicted |
| CID45934475 | CYP3A4   | predicted |
| CID45934475 | ALOX5    | predicted |
| CID45934475 | CYP2C9   | predicted |
| CID45934475 | LMNA     | predicted |
| CID45934475 | TSHR     | predicted |
| CID45934475 | CYP2C19  | predicted |
| CID45934475 | ALDH1A1  | predicted |
| CID45934475 | HSD17B10 | predicted |
| CID45934475 | KMT2A    | predicted |
| CID45934475 | MAPK1    | predicted |
| CID45934475 | ABCG2    | predicted |
| CID45934475 | RAB9A    | predicted |
| CID45934475 | ALOX15   | predicted |
| CID45934475 | PTPN1    | predicted |
| CID45934475 | TDP1     | predicted |
| CID45934475 | CYP19A1  | predicted |
| CID45934475 | KDM4E    | predicted |
| CID45934475 | NPC1     | predicted |
| CID45934475 | NPSR1    | predicted |
| CID572766   | TSHR     | predicted |
| CID572766   | PTPN1    | predicted |
| CID572766   | ESR1     | predicted |
| CID572766   | TP53     | predicted |
| CID572766   | CYP3A4   | predicted |
| CID572766   | LMNA     | predicted |
| CID572766   | MAPT     | predicted |
| CID572766   | ALDH1A1  | predicted |
| CID572766   | EED      | predicted |
| CID572766   | ESR2     | predicted |
| CID572766   | MAPK1    | predicted |
| CID572766   | NPC1     | predicted |
| CID572766   | CYP2A6   | predicted |
| CID572766   | RAB9A    | predicted |
| CID572766   | TRPA1    | predicted |
| CID572766   | TDP1     | predicted |
| CID572766   | SMN1     | predicted |
| CID572766   | ALOX15   | predicted |
| CID572766   | ELAVL1   | predicted |
| CID572766   | GPBAR1   | predicted |
| CID7460     | LMNA     | predicted |
| CID7460     | TSHR     | predicted |
| CID7460     | PTPN1    | predicted |
| CID7460     | MAPT     | predicted |
| CID7460     | CYP3A4   | predicted |
| CID7460     | RAB9A    | predicted |
| CID7460     | TDP1     | predicted |
| CID7460     | ALDH1A1  | predicted |
| CID7460     | ALOX15   | predicted |
| CID7460     | OPRM1    | predicted |
| CID7460     | ACHE     | predicted |
| CID7460     | TP53     | predicted |
| CID7460     | SMN1     | predicted |
| CID7460     | CYP19A1  | predicted |
| CID7460     | NPC1     | predicted |
| CID7460     | KMT2A    | predicted |
| CID7460     | CNR2     | predicted |
| CID7460     | MAPK1    | predicted |

|          |         |           |
|----------|---------|-----------|
| CID7460  | PPARG   | predicted |
| CID7460  | HSF1    | predicted |
| CID17868 | PTPN1   | predicted |
| CID17868 | NR1H3   | predicted |
| CID17868 | PRKCD   | predicted |
| CID17868 | LMNA    | predicted |
| CID17868 | TSHR    | predicted |
| CID17868 | MAPT    | predicted |
| CID17868 | GPBAR1  | predicted |
| CID17868 | RAB9A   | predicted |
| CID17868 | CYP3A4  | predicted |
| CID17868 | HSD11B1 | predicted |
| CID17868 | PRKCA   | predicted |
| CID17868 | NPC1    | predicted |
| CID17868 | SLCO1B3 | predicted |
| CID17868 | SLCO1B1 | predicted |
| CID17868 | XBP1    | predicted |
| CID17868 | TP53    | predicted |
| CID17868 | SMN1    | predicted |
| CID17868 | TNF     | predicted |
| CID17868 | CYP19A1 | predicted |
| CID17868 | ESR1    | predicted |
| CID91354 | NR1H3   | predicted |
| CID91354 | PRKCD   | predicted |
| CID91354 | PTPN1   | predicted |
| CID91354 | LMNA    | predicted |
| CID91354 | TSHR    | predicted |
| CID91354 | MAPT    | predicted |
| CID91354 | GPBAR1  | predicted |
| CID91354 | CYP3A4  | predicted |
| CID91354 | HSD11B1 | predicted |
| CID91354 | RAB9A   | predicted |
| CID91354 | PRKCA   | predicted |
| CID91354 | ACHE    | predicted |
| CID91354 | XBP1    | predicted |
| CID91354 | SHBG    | predicted |
| CID91354 | NPC1    | predicted |
| CID91354 | ESR1    | predicted |
| CID91354 | ALDH1A1 | predicted |
| CID91354 | CYP19A1 | predicted |
| CID91354 | SMN1    | predicted |
| CID91354 | ESR2    | predicted |
| CID31253 | TSHR    | predicted |
| CID31253 | ALDH1A1 | predicted |
| CID31253 | PTPN1   | predicted |
| CID31253 | ALOX15  | predicted |
| CID31253 | CYP3A4  | predicted |
| CID31253 | ALOX5   | predicted |
| CID31253 | LMNA    | predicted |
| CID31253 | TRPA1   | predicted |
| CID31253 | MAPT    | predicted |
| CID31253 | CNR2    | predicted |
| CID31253 | TP53    | predicted |
| CID31253 | ACHE    | predicted |
| CID31253 | KMT2A   | predicted |
| CID31253 | CNR1    | predicted |
| CID31253 | PPARG   | predicted |
| CID31253 | PPARA   | predicted |

|            |         |           |
|------------|---------|-----------|
| CID31253   | ABCG2   | predicted |
| CID31253   | TDP1    | predicted |
| CID31253   | BCHE    | predicted |
| CID31253   | MAOB    | predicted |
| CID547972  | PTPN1   | predicted |
| CID547972  | LMNA    | predicted |
| CID547972  | TSHR    | predicted |
| CID547972  | MAPT    | predicted |
| CID547972  | CYP3A4  | predicted |
| CID547972  | GPBAR1  | predicted |
| CID547972  | HSD11B1 | predicted |
| CID547972  | TP53    | predicted |
| CID547972  | RAB9A   | predicted |
| CID547972  | SMN1    | predicted |
| CID547972  | CNR2    | predicted |
| CID547972  | ALDH1A1 | predicted |
| CID547972  | CYP19A1 | predicted |
| CID547972  | NPC1    | predicted |
| CID547972  | CNR1    | predicted |
| CID547972  | KMT2A   | predicted |
| CID547972  | TDP1    | predicted |
| CID547972  | SLCO1B3 | predicted |
| CID547972  | SLCO1B1 | predicted |
| CID547972  | MAPK1   | predicted |
| CID6508206 | PTPN1   | predicted |
| CID6508206 | LMNA    | predicted |
| CID6508206 | TSHR    | predicted |
| CID6508206 | MAPT    | predicted |
| CID6508206 | CYP3A4  | predicted |
| CID6508206 | ALDH1A1 | predicted |
| CID6508206 | CNR2    | predicted |
| CID6508206 | TP53    | predicted |
| CID6508206 | PDE4D   | predicted |
| CID6508206 | RAB9A   | predicted |
| CID6508206 | ACHE    | predicted |
| CID6508206 | CNR1    | predicted |
| CID6508206 | KMT2A   | predicted |
| CID6508206 | ODC1    | predicted |
| CID6508206 | SLCO1B3 | predicted |
| CID6508206 | TDP1    | predicted |
| CID6508206 | SLCO1B1 | predicted |
| CID6508206 | SMN1    | predicted |
| CID6508206 | NPC1    | predicted |
| CID6508206 | HSD11B1 | predicted |
| CID1549026 | LMNA    | predicted |
| CID1549026 | CYP3A4  | predicted |
| CID1549026 | ALDH1A1 | predicted |
| CID1549026 | MAPT    | predicted |
| CID1549026 | TSHR    | predicted |
| CID1549026 | PTPN1   | predicted |
| CID1549026 | KMT2A   | predicted |
| CID1549026 | ALOX15  | predicted |
| CID1549026 | TP53    | predicted |
| CID1549026 | TDP1    | predicted |
| CID1549026 | SMN1    | predicted |
| CID1549026 | MAPK1   | predicted |
| CID1549026 | CA9     | predicted |
| CID1549026 | RAB9A   | predicted |

|            |         |           |
|------------|---------|-----------|
| CID1549026 | ACHE    | predicted |
| CID1549026 | PPARG   | predicted |
| CID1549026 | NPC1    | predicted |
| CID1549026 | CA1     | predicted |
| CID1549026 | ALOX5   | predicted |
| CID1549026 | ABCG2   | predicted |
| CID18818   | NR1H3   | predicted |
| CID18818   | PTPN1   | predicted |
| CID18818   | PRKCD   | predicted |
| CID18818   | LMNA    | predicted |
| CID18818   | TSHR    | predicted |
| CID18818   | GPBAR1  | predicted |
| CID18818   | MAPT    | predicted |
| CID18818   | RAB9A   | predicted |
| CID18818   | CYP3A4  | predicted |
| CID18818   | PRKCA   | predicted |
| CID18818   | NPC1    | predicted |
| CID18818   | HSD11B1 | predicted |
| CID18818   | ESR1    | predicted |
| CID18818   | SLCO1B3 | predicted |
| CID18818   | SLCO1B1 | predicted |
| CID18818   | SHBG    | predicted |
| CID18818   | XBP1    | predicted |
| CID18818   | SMN1    | predicted |
| CID18818   | TP53    | predicted |
| CID18818   | CYP19A1 | predicted |
| CID5281553 | TSHR    | predicted |
| CID5281553 | ALDH1A1 | predicted |
| CID5281553 | TRPA1   | predicted |
| CID5281553 | TP53    | predicted |
| CID5281553 | CYP3A4  | predicted |
| CID5281553 | MAPT    | predicted |
| CID5281553 | LMNA    | predicted |
| CID5281553 | PTPN1   | predicted |
| CID5281553 | CNR2    | predicted |
| CID5281553 | ALOX5   | predicted |
| CID5281553 | ALOX15  | predicted |
| CID5281553 | CNR1    | predicted |
| CID5281553 | KMT2A   | predicted |
| CID5281553 | ACHE    | predicted |
| CID5281553 | ABCG2   | predicted |
| CID5281553 | CYP19A1 | predicted |
| CID5281553 | TDP1    | predicted |
| CID5281553 | SMN1    | predicted |
| CID5281553 | HPGD    | predicted |
| CID5281553 | PTGS1   | predicted |
| CID6370843 | TSHR    | predicted |
| CID6370843 | LMNA    | predicted |
| CID6370843 | PTPN1   | predicted |
| CID6370843 | MAPT    | predicted |
| CID6370843 | CYP3A4  | predicted |
| CID6370843 | ALDH1A1 | predicted |
| CID6370843 | ACHE    | predicted |
| CID6370843 | ALOX5   | predicted |
| CID6370843 | ALOX15  | predicted |
| CID6370843 | TP53    | predicted |
| CID6370843 | KMT2A   | predicted |
| CID6370843 | PPARG   | predicted |

|            |         |           |
|------------|---------|-----------|
| CID6370843 | TDP1    | predicted |
| CID6370843 | SMN1    | predicted |
| CID6370843 | MAPK1   | predicted |
| CID6370843 | RAB9A   | predicted |
| CID6370843 | CNR2    | predicted |
| CID6370843 | CYP19A1 | predicted |
| CID6370843 | MPEG1   | predicted |
| CID6370843 | ABCG2   | predicted |
| CID15095   | PTPN1   | predicted |
| CID15095   | LMNA    | predicted |
| CID15095   | TSHR    | predicted |
| CID15095   | MAPT    | predicted |
| CID15095   | HSD11B1 | predicted |
| CID15095   | GPBAR1  | predicted |
| CID15095   | CYP3A4  | predicted |
| CID15095   | SLCO1B3 | predicted |
| CID15095   | SLCO1B1 | predicted |
| CID15095   | HSD11B2 | predicted |
| CID15095   | ACHE    | predicted |
| CID15095   | RAB9A   | predicted |
| CID15095   | NR1H3   | predicted |
| CID15095   | SMN1    | predicted |
| CID15095   | PTPN2   | predicted |
| CID15095   | TNF     | predicted |
| CID15095   | XBP1    | predicted |
| CID15095   | TP53    | predicted |
| CID15095   | ALDH1A1 | predicted |
| CID15095   | CYP19A1 | predicted |
| CID5281522 | TSHR    | predicted |
| CID5281522 | PTPN1   | predicted |
| CID5281522 | LMNA    | predicted |
| CID5281522 | CYP3A4  | predicted |
| CID5281522 | MAPT    | predicted |
| CID5281522 | GPBAR1  | predicted |
| CID5281522 | ALDH1A1 | predicted |
| CID5281522 | ACHE    | predicted |
| CID5281522 | SMN1    | predicted |
| CID5281522 | CYP19A1 | predicted |
| CID5281522 | HSD11B1 | predicted |
| CID5281522 | RAB9A   | predicted |
| CID5281522 | KMT2A   | predicted |
| CID5281522 | SHBG    | predicted |
| CID5281522 | TDP1    | predicted |
| CID5281522 | BCHE    | predicted |
| CID5281522 | TP53    | predicted |
| CID5281522 | ALOX5   | predicted |
| CID5281522 | ALOX15  | predicted |
| CID5281522 | MAPK1   | predicted |
| CID98497   | PTPN1   | predicted |
| CID98497   | LMNA    | predicted |
| CID98497   | MAPT    | predicted |
| CID98497   | TSHR    | predicted |
| CID98497   | CYP3A4  | predicted |
| CID98497   | ALDH1A1 | predicted |
| CID98497   | GPBAR1  | predicted |
| CID98497   | CYP19A1 | predicted |
| CID98497   | RAB9A   | predicted |
| CID98497   | SMN1    | predicted |

|             |         |           |
|-------------|---------|-----------|
| CID98497    | NPC1    | predicted |
| CID98497    | TDP1    | predicted |
| CID98497    | HSD11B1 | predicted |
| CID98497    | MAPK1   | predicted |
| CID98497    | KMT2A   | predicted |
| CID98497    | SHBG    | predicted |
| CID98497    | TP53    | predicted |
| CID98497    | ACHE    | predicted |
| CID98497    | TNF     | predicted |
| CID98497    | BCHE    | predicted |
| CID21159064 | PTPN1   | predicted |
| CID21159064 | TSHR    | predicted |
| CID21159064 | LMNA    | predicted |
| CID21159064 | MAPT    | predicted |
| CID21159064 | CYP3A4  | predicted |
| CID21159064 | ALDH1A1 | predicted |
| CID21159064 | CNR2    | predicted |
| CID21159064 | CNR1    | predicted |
| CID21159064 | ACHE    | predicted |
| CID21159064 | TP53    | predicted |
| CID21159064 | SLCO1B3 | predicted |
| CID21159064 | ALOX5   | predicted |
| CID21159064 | RAB9A   | predicted |
| CID21159064 | SLCO1B1 | predicted |
| CID21159064 | TDP1    | predicted |
| CID21159064 | PPARG   | predicted |
| CID21159064 | KMT2A   | predicted |
| CID21159064 | SMN1    | predicted |
| CID21159064 | GPBAR1  | predicted |
| CID21159064 | TRPV1   | predicted |
| CID5373727  | LMNA    | predicted |
| CID5373727  | TSHR    | predicted |
| CID5373727  | PTPN1   | predicted |
| CID5373727  | CYP3A4  | predicted |
| CID5373727  | MAPT    | predicted |
| CID5373727  | ALDH1A1 | predicted |
| CID5373727  | ACHE    | predicted |
| CID5373727  | ALOX15  | predicted |
| CID5373727  | TDP1    | predicted |
| CID5373727  | RAB9A   | predicted |
| CID5373727  | SMN1    | predicted |
| CID5373727  | KMT2A   | predicted |
| CID5373727  | NPC1    | predicted |
| CID5373727  | TP53    | predicted |
| CID5373727  | PPARG   | predicted |
| CID5373727  | CYP19A1 | predicted |
| CID5373727  | CNR2    | predicted |
| CID5373727  | ALOX5   | predicted |
| CID5373727  | MAPK1   | predicted |
| CID5373727  | BCHE    | predicted |
| CID11142    | LMNA    | predicted |
| CID11142    | TSHR    | predicted |
| CID11142    | PTPN1   | predicted |
| CID11142    | CYP3A4  | predicted |
| CID11142    | MAPT    | predicted |
| CID11142    | ALDH1A1 | predicted |
| CID11142    | RAB9A   | predicted |
| CID11142    | ACHE    | predicted |

|           |         |           |
|-----------|---------|-----------|
| CID11142  | TDP1    | predicted |
| CID11142  | SMN1    | predicted |
| CID11142  | TP53    | predicted |
| CID11142  | NPC1    | predicted |
| CID11142  | CYP19A1 | predicted |
| CID11142  | ALOX15  | predicted |
| CID11142  | CNR2    | predicted |
| CID11142  | KMT2A   | predicted |
| CID11142  | MAPK1   | predicted |
| CID11142  | PPARG   | predicted |
| CID11142  | CNR1    | predicted |
| CID11142  | GPBAR1  | predicted |
| CID92139  | ACHE    | predicted |
| CID92139  | CYP2A6  | predicted |
| CID92139  | PTPN1   | predicted |
| CID92139  | LMNA    | predicted |
| CID92139  | CNR2    | predicted |
| CID92139  | ALDH1A1 | predicted |
| CID92139  | CNR1    | predicted |
| CID92139  | MAPT    | predicted |
| CID92139  | CYP3A4  | predicted |
| CID92139  | ALOX15  | predicted |
| CID92139  | TSHR    | predicted |
| CID92139  | CYP19A1 | predicted |
| CID92139  | KMT2A   | predicted |
| CID92139  | PPARG   | predicted |
| CID92139  | PTGS1   | predicted |
| CID92139  | TDP1    | predicted |
| CID92139  | TAAR1   | predicted |
| CID92139  | TYR     | predicted |
| CID92139  | SMN1    | predicted |
| CID92139  | TRPA1   | predicted |
| CID521253 | PTPN1   | predicted |
| CID521253 | LMNA    | predicted |
| CID521253 | TSHR    | predicted |
| CID521253 | MAPT    | predicted |
| CID521253 | ALOX15  | predicted |
| CID521253 | CYP3A4  | predicted |
| CID521253 | ALDH1A1 | predicted |
| CID521253 | ACHE    | predicted |
| CID521253 | TDP1    | predicted |
| CID521253 | KMT2A   | predicted |
| CID521253 | RAB9A   | predicted |
| CID521253 | ALOX5   | predicted |
| CID521253 | PPARG   | predicted |
| CID521253 | OPRM1   | predicted |
| CID521253 | CNR2    | predicted |
| CID521253 | BCHE    | predicted |
| CID521253 | SMN1    | predicted |
| CID521253 | MAPK1   | predicted |
| CID521253 | CYP19A1 | predicted |
| CID521253 | TP53    | predicted |
| CID519361 | PTPN1   | predicted |
| CID519361 | LMNA    | predicted |
| CID519361 | TSHR    | predicted |
| CID519361 | GPBAR1  | predicted |
| CID519361 | MAPT    | predicted |
| CID519361 | CYP3A4  | predicted |

|           |          |           |
|-----------|----------|-----------|
| CID519361 | HSD11B1  | predicted |
| CID519361 | SLCO1B3  | predicted |
| CID519361 | SHBG     | predicted |
| CID519361 | SLCO1B1  | predicted |
| CID519361 | RAB9A    | predicted |
| CID519361 | CYP19A1  | predicted |
| CID519361 | TP53     | predicted |
| CID519361 | SMN1     | predicted |
| CID519361 | ACHE     | predicted |
| CID519361 | NPC1     | predicted |
| CID519361 | ALDH1A1  | predicted |
| CID519361 | TDP1     | predicted |
| CID519361 | PTPN2    | predicted |
| CID519361 | XBP1     | predicted |
| CID94254  | PTPN1    | predicted |
| CID94254  | TSHR     | predicted |
| CID94254  | LMNA     | predicted |
| CID94254  | MAPT     | predicted |
| CID94254  | CYP3A4   | predicted |
| CID94254  | GPBAR1   | predicted |
| CID94254  | TP53     | predicted |
| CID94254  | ALDH1A1  | predicted |
| CID94254  | TRPA1    | predicted |
| CID94254  | HSD11B1  | predicted |
| CID94254  | SLCO1B3  | predicted |
| CID94254  | ALOX5    | predicted |
| CID94254  | SLCO1B1  | predicted |
| CID94254  | CNR2     | predicted |
| CID94254  | RAB9A    | predicted |
| CID94254  | ACHE     | predicted |
| CID94254  | SMN1     | predicted |
| CID94254  | CYP19A1  | predicted |
| CID94254  | KMT2A    | predicted |
| CID94254  | SHBG     | predicted |
| CID6448   | LMNA     | predicted |
| CID6448   | MAPT     | predicted |
| CID6448   | PTPN1    | predicted |
| CID6448   | CYP3A4   | predicted |
| CID6448   | TSHR     | predicted |
| CID6448   | RAB9A    | predicted |
| CID6448   | GPBAR1   | predicted |
| CID6448   | SMN1     | predicted |
| CID6448   | NPC1     | predicted |
| CID6448   | HSP90AA1 | predicted |
| CID6448   | ALDH1A1  | predicted |
| CID6448   | KMT2A    | predicted |
| CID6448   | TDP1     | predicted |
| CID6448   | XBP1     | predicted |
| CID6448   | HSD11B1  | predicted |
| CID6448   | CYP19A1  | predicted |
| CID6448   | AKR1B10  | predicted |
| CID6448   | HTT      | predicted |
| CID6448   | NPSR1    | predicted |
| CID6448   | TP53     | predicted |
| CID89316  | PTPN1    | predicted |
| CID89316  | TSHR     | predicted |
| CID89316  | LMNA     | predicted |
| CID89316  | MAPT     | predicted |



|            |         |           |
|------------|---------|-----------|
| CID89316   | GPBAR1  | predicted |
| CID89316   | CYP3A4  | predicted |
| CID89316   | TRPA1   | predicted |
| CID89316   | TP53    | predicted |
| CID89316   | ALDH1A1 | predicted |
| CID89316   | HSD11B1 | predicted |
| CID89316   | SLCO1B3 | predicted |
| CID89316   | SLCO1B1 | predicted |
| CID89316   | RAB9A   | predicted |
| CID89316   | CNR2    | predicted |
| CID89316   | ALOX5   | predicted |
| CID89316   | NPC1    | predicted |
| CID89316   | ACHE    | predicted |
| CID89316   | SMN1    | predicted |
| CID89316   | SHBG    | predicted |
| CID89316   | ALOX15  | predicted |
| CID29025   | PTPN1   | predicted |
| CID29025   | TSHR    | predicted |
| CID29025   | TNF     | predicted |
| CID29025   | LMNA    | predicted |
| CID29025   | MAPT    | predicted |
| CID29025   | CYP3A4  | predicted |
| CID29025   | HSD11B1 | predicted |
| CID29025   | HSD11B2 | predicted |
| CID29025   | GPBAR1  | predicted |
| CID29025   | SMN1    | predicted |
| CID29025   | ALOX5   | predicted |
| CID29025   | CYP19A1 | predicted |
| CID29025   | RAB9A   | predicted |
| CID29025   | ALDH1A1 | predicted |
| CID29025   | SHBG    | predicted |
| CID29025   | PTPN2   | predicted |
| CID29025   | TDP1    | predicted |
| CID29025   | SLCO1B3 | predicted |
| CID29025   | KMT2A   | predicted |
| CID29025   | SLCO1B1 | predicted |
| CID6285549 | TSHR    | predicted |
| CID6285549 | PTPN1   | predicted |
| CID6285549 | LMNA    | predicted |
| CID6285549 | CYP3A4  | predicted |
| CID6285549 | MAPT    | predicted |
| CID6285549 | ACHE    | predicted |
| CID6285549 | GPBAR1  | predicted |
| CID6285549 | ALDH1A1 | predicted |
| CID6285549 | SMN1    | predicted |
| CID6285549 | RAB9A   | predicted |
| CID6285549 | CYP19A1 | predicted |
| CID6285549 | HSD11B1 | predicted |
| CID6285549 | KMT2A   | predicted |
| CID6285549 | SHBG    | predicted |
| CID6285549 | TDP1    | predicted |
| CID6285549 | BCHE    | predicted |
| CID6285549 | TP53    | predicted |
| CID6285549 | NPC1    | predicted |
| CID6285549 | SLCO1B3 | predicted |
| CID6285549 | ALOX5   | predicted |
| CID5316213 | TSHR    | predicted |
| CID5316213 | LMNA    | predicted |

|            |         |           |
|------------|---------|-----------|
| CID5316213 | PTPN1   | predicted |
| CID5316213 | MAPT    | predicted |
| CID5316213 | CYP3A4  | predicted |
| CID5316213 | ALDH1A1 | predicted |
| CID5316213 | ALOX15  | predicted |
| CID5316213 | ACHE    | predicted |
| CID5316213 | ALOX5   | predicted |
| CID5316213 | TDP1    | predicted |
| CID5316213 | KMT2A   | predicted |
| CID5316213 | PPARG   | predicted |
| CID5316213 | CYP19A1 | predicted |
| CID5316213 | SMN1    | predicted |
| CID5316213 | MAPK1   | predicted |
| CID5316213 | RAB9A   | predicted |
| CID5316213 | CNR2    | predicted |
| CID5316213 | TP53    | predicted |
| CID5316213 | CNR1    | predicted |
| CID5316213 | NPC1    | predicted |
| CID10123   | PTPN1   | predicted |
| CID10123   | LMNA    | predicted |
| CID10123   | TSHR    | predicted |
| CID10123   | GPBAR1  | predicted |
| CID10123   | MAPT    | predicted |
| CID10123   | HSD11B1 | predicted |
| CID10123   | CYP3A4  | predicted |
| CID10123   | SLCO1B3 | predicted |
| CID10123   | SLCO1B1 | predicted |
| CID10123   | SHBG    | predicted |
| CID10123   | RAB9A   | predicted |
| CID10123   | CYP19A1 | predicted |
| CID10123   | ACHE    | predicted |
| CID10123   | TP53    | predicted |
| CID10123   | SMN1    | predicted |
| CID10123   | PTPN2   | predicted |
| CID10123   | ALDH1A1 | predicted |
| CID10123   | XBP1    | predicted |
| CID10123   | TDP1    | predicted |
| CID10123   | TNF     | predicted |
| CID289964  | PTPN1   | predicted |
| CID289964  | LMNA    | predicted |
| CID289964  | MAPT    | predicted |
| CID289964  | TSHR    | predicted |
| CID289964  | CYP3A4  | predicted |
| CID289964  | GPBAR1  | predicted |
| CID289964  | HSD11B1 | predicted |
| CID289964  | RAB9A   | predicted |
| CID289964  | SMN1    | predicted |
| CID289964  | CYP19A1 | predicted |
| CID289964  | NPC1    | predicted |
| CID289964  | KMT2A   | predicted |
| CID289964  | TNF     | predicted |
| CID289964  | ACHE    | predicted |
| CID289964  | TDP1    | predicted |
| CID289964  | CNR2    | predicted |
| CID289964  | SHBG    | predicted |
| CID289964  | ALDH1A1 | predicted |
| CID289964  | XBP1    | predicted |
| CID289964  | CNR1    | predicted |

|           |          |           |
|-----------|----------|-----------|
| CID530426 | NR1H3    | predicted |
| CID530426 | PTPN1    | predicted |
| CID530426 | PRKCD    | predicted |
| CID530426 | LMNA     | predicted |
| CID530426 | TSHR     | predicted |
| CID530426 | MAPT     | predicted |
| CID530426 | GPBAR1   | predicted |
| CID530426 | HSD11B1  | predicted |
| CID530426 | ACHE     | predicted |
| CID530426 | CYP3A4   | predicted |
| CID530426 | RAB9A    | predicted |
| CID530426 | XBP1     | predicted |
| CID530426 | PRKCA    | predicted |
| CID530426 | ALDH1A1  | predicted |
| CID530426 | NPC1     | predicted |
| CID530426 | CYP19A1  | predicted |
| CID530426 | ESR1     | predicted |
| CID530426 | SLCO1B3  | predicted |
| CID530426 | TNF      | predicted |
| CID530426 | TDP1     | predicted |
| CID8815   | MAPT     | predicted |
| CID8815   | CYP3A4   | predicted |
| CID8815   | HPGD     | predicted |
| CID8815   | TSHR     | predicted |
| CID8815   | LMNA     | predicted |
| CID8815   | HSD17B10 | predicted |
| CID8815   | NPC1     | predicted |
| CID8815   | RAB9A    | predicted |
| CID8815   | ALOX15   | predicted |
| CID8815   | CYP2C19  | predicted |
| CID8815   | TBXAS1   | predicted |
| CID8815   | THPO     | predicted |
| CID8815   | HBB      | predicted |
| CID8815   | ALDH1A1  | predicted |
| CID8815   | HIF1A    | predicted |
| CID8815   | CASP1    | predicted |
| CID8815   | MAPK1    | predicted |
| CID8815   | TDP1     | predicted |
| CID8815   | KDM4E    | predicted |
| CID8815   | CYP2C9   | predicted |
| CID8815   | TP53     | Known     |
| CID8815   | SMN1     | Known     |
| CID111037 | LMNA     | predicted |
| CID111037 | CYP3A4   | predicted |
| CID111037 | PTPN1    | predicted |
| CID111037 | MAPT     | predicted |
| CID111037 | TSHR     | predicted |
| CID111037 | SMN1     | predicted |
| CID111037 | ALDH1A1  | predicted |
| CID111037 | RAB9A    | predicted |
| CID111037 | KMT2A    | predicted |
| CID111037 | NPC1     | predicted |
| CID111037 | TDP1     | predicted |
| CID111037 | TP53     | predicted |
| CID111037 | MAPK1    | predicted |
| CID111037 | NPSR1    | predicted |
| CID111037 | CYP19A1  | predicted |
| CID111037 | ACHE     | predicted |

|           |          |           |
|-----------|----------|-----------|
| CID111037 | HTT      | predicted |
| CID111037 | PPARG    | predicted |
| CID111037 | HSP90AA1 | predicted |
| CID111037 | CA9      | predicted |
| CID403919 | PTPN1    | predicted |
| CID403919 | LMNA     | predicted |
| CID403919 | TSHR     | predicted |
| CID403919 | MAPT     | predicted |
| CID403919 | ACHE     | predicted |
| CID403919 | CYP3A4   | predicted |
| CID403919 | ALOX15   | predicted |
| CID403919 | ALDH1A1  | predicted |
| CID403919 | ALOX5    | predicted |
| CID403919 | KMT2A    | predicted |
| CID403919 | PPARG    | predicted |
| CID403919 | BCHE     | predicted |
| CID403919 | TDP1     | predicted |
| CID403919 | MAPK1    | predicted |
| CID403919 | CYP19A1  | predicted |
| CID403919 | SMN1     | predicted |
| CID403919 | CNR2     | predicted |
| CID403919 | TP53     | predicted |
| CID403919 | CNR1     | predicted |
| CID403919 | GPBAR1   | predicted |
| CID86608  | PTPN1    | predicted |
| CID86608  | TSHR     | predicted |
| CID86608  | LMNA     | predicted |
| CID86608  | CYP3A4   | predicted |
| CID86608  | MAPT     | predicted |
| CID86608  | GPBAR1   | predicted |
| CID86608  | ACHE     | predicted |
| CID86608  | ALDH1A1  | predicted |
| CID86608  | ALOX15   | predicted |
| CID86608  | KMT2A    | predicted |
| CID86608  | HSD11B1  | predicted |
| CID86608  | ALOX5    | predicted |
| CID86608  | SLCO1B3  | predicted |
| CID86608  | SLCO1B1  | predicted |
| CID86608  | BCHE     | predicted |
| CID86608  | TDP1     | predicted |
| CID86608  | RAB9A    | predicted |
| CID86608  | CYP19A1  | predicted |
| CID86608  | XBP1     | predicted |
| CID86608  | TP53     | predicted |
| CID15094  | LMNA     | predicted |
| CID15094  | PTPN1    | predicted |
| CID15094  | TSHR     | predicted |
| CID15094  | MAPT     | predicted |
| CID15094  | CYP3A4   | predicted |
| CID15094  | ACHE     | predicted |
| CID15094  | ALDH1A1  | predicted |
| CID15094  | RAB9A    | predicted |
| CID15094  | SMN1     | predicted |
| CID15094  | TDP1     | predicted |
| CID15094  | CYP19A1  | predicted |
| CID15094  | ALOX15   | predicted |
| CID15094  | TP53     | predicted |
| CID15094  | GPBAR1   | predicted |

|            |         |           |
|------------|---------|-----------|
| CID15094   | ALOX5   | predicted |
| CID15094   | NPC1    | predicted |
| CID15094   | KMT2A   | predicted |
| CID15094   | MAPK1   | predicted |
| CID15094   | CNR2    | predicted |
| CID15094   | CNR1    | predicted |
| CID102667  | PTPN1   | predicted |
| CID102667  | TSHR    | predicted |
| CID102667  | LMNA    | predicted |
| CID102667  | MAPT    | predicted |
| CID102667  | CYP3A4  | predicted |
| CID102667  | GPBAR1  | predicted |
| CID102667  | SMN1    | predicted |
| CID102667  | RAB9A   | predicted |
| CID102667  | HSD11B1 | predicted |
| CID102667  | TDP1    | predicted |
| CID102667  | TP53    | predicted |
| CID102667  | NPC1    | predicted |
| CID102667  | CYP19A1 | predicted |
| CID102667  | AKR1B10 | predicted |
| CID102667  | SLCO1B3 | predicted |
| CID102667  | SLCO1B1 | predicted |
| CID102667  | KMT2A   | predicted |
| CID102667  | SHBG    | predicted |
| CID102667  | TNF     | predicted |
| CID102667  | MAPK1   | predicted |
| CID5322078 | MAPT    | predicted |
| CID5322078 | CYP3A4  | predicted |
| CID5322078 | ABCG2   | predicted |
| CID5322078 | RAB9A   | predicted |
| CID5322078 | NPC1    | predicted |
| CID5322078 | CYP19A1 | predicted |
| CID5322078 | MAOA    | predicted |
| CID5322078 | BACE1   | predicted |
| CID5322078 | KMT2A   | predicted |
| CID5322078 | ALDH1A1 | predicted |
| CID5322078 | ABCB1   | predicted |
| CID5322078 | MAPK1   | predicted |
| CID5322078 | KDM4E   | predicted |
| CID5322078 | TDP1    | predicted |
| CID5322078 | F3      | predicted |
| CID5322078 | ACHE    | predicted |
| CID5322078 | TP53    | predicted |
| CID5322078 | ADORA3  | predicted |
| CID5322078 | LMNA    | predicted |
| CID5322078 | CA1     | predicted |
| CID16724   | PTPN1   | predicted |
| CID16724   | LMNA    | predicted |
| CID16724   | MAPT    | predicted |
| CID16724   | CYP19A1 | predicted |
| CID16724   | TSHR    | predicted |
| CID16724   | CYP3A4  | predicted |
| CID16724   | ALOX5   | predicted |
| CID16724   | ALDH1A1 | predicted |
| CID16724   | SMN1    | predicted |
| CID16724   | TNF     | predicted |
| CID16724   | RAB9A   | predicted |
| CID16724   | GPBAR1  | predicted |

|            |         |           |
|------------|---------|-----------|
| CID16724   | ACHE    | predicted |
| CID16724   | MPEG1   | predicted |
| CID16724   | TDP1    | predicted |
| CID16724   | MAPK1   | predicted |
| CID16724   | KMT2A   | predicted |
| CID16724   | ABCG2   | predicted |
| CID16724   | SHBG    | predicted |
| CID16724   | TP53    | predicted |
| CID153441  | MAPT    | predicted |
| CID153441  | CYP3A4  | predicted |
| CID153441  | ABCG2   | predicted |
| CID153441  | RAB9A   | predicted |
| CID153441  | MAOA    | predicted |
| CID153441  | ABCB1   | predicted |
| CID153441  | ALDH1A1 | predicted |
| CID153441  | NPC1    | predicted |
| CID153441  | CYP19A1 | predicted |
| CID153441  | BACE1   | predicted |
| CID153441  | KMT2A   | predicted |
| CID153441  | TDP1    | predicted |
| CID153441  | KDM4E   | predicted |
| CID153441  | LMNA    | predicted |
| CID153441  | TP53    | predicted |
| CID153441  | CTSV    | predicted |
| CID153441  | MAPK1   | predicted |
| CID153441  | CYP2C19 | predicted |
| CID153441  | TSHR    | predicted |
| CID153441  | ACHE    | predicted |
| CID3017257 | TSHR    | predicted |
| CID3017257 | LMNA    | predicted |
| CID3017257 | PTPN1   | predicted |
| CID3017257 | MPEG1   | predicted |
| CID3017257 | HMGCR   | predicted |
| CID3017257 | ALOX5   | predicted |
| CID3017257 | MAPT    | predicted |
| CID3017257 | CYP19A1 | predicted |
| CID3017257 | CYP3A4  | predicted |
| CID3017257 | TRPV1   | predicted |
| CID3017257 | PPARG   | predicted |
| CID3017257 | FAAH    | predicted |
| CID3017257 | GPBAR1  | predicted |
| CID3017257 | ALDH1A1 | predicted |
| CID3017257 | ACHE    | predicted |
| CID3017257 | SMN1    | predicted |
| CID3017257 | SHBG    | predicted |
| CID3017257 | TDP1    | predicted |
| CID3017257 | FABP3   | predicted |
| CID3017257 | ALOX15  | predicted |
| CID5258991 | CYP19A1 | predicted |
| CID5258991 | CYP3A4  | predicted |
| CID5258991 | MAPT    | predicted |
| CID5258991 | ABCG2   | predicted |
| CID5258991 | BACE1   | predicted |
| CID5258991 | MAOA    | predicted |
| CID5258991 | LMNA    | predicted |
| CID5258991 | TDP1    | predicted |
| CID5258991 | MAPK1   | predicted |
| CID5258991 | RAB9A   | predicted |

|            |         |           |
|------------|---------|-----------|
| CID5258991 | NPC1    | predicted |
| CID5258991 | PTPN1   | predicted |
| CID5258991 | ACHE    | predicted |
| CID5258991 | KDM4E   | predicted |
| CID5258991 | POLB    | predicted |
| CID5258991 | KMT2A   | predicted |
| CID5258991 | CYP2C19 | predicted |
| CID5258991 | ALDH1A1 | predicted |
| CID5258991 | CYP1B1  | predicted |
| CID5258991 | ALOX15  | predicted |
| CID129670  | HTR3A   | predicted |
| CID129670  | AKR1C3  | predicted |
| CID129670  | TAAR1   | predicted |
| CID129670  | MAPT    | predicted |
| CID129670  | CYP3A4  | predicted |
| CID129670  | TSHR    | predicted |
| CID129670  | CYP19A1 | predicted |
| CID129670  | LMNA    | predicted |
| CID129670  | ABCG2   | predicted |
| CID129670  | MAOA    | predicted |
| CID129670  | ALDH1A1 | predicted |
| CID129670  | RAB9A   | predicted |
| CID129670  | PTPN1   | predicted |
| CID129670  | NPC1    | predicted |
| CID129670  | TP53    | predicted |
| CID129670  | KMT2A   | predicted |
| CID129670  | KDM4E   | predicted |
| CID129670  | HTR2B   | predicted |
| CID129670  | MAPK1   | predicted |
| CID129670  | BACE1   | predicted |
| CID5316931 | TAAR1   | predicted |
| CID5316931 | LMNA    | predicted |
| CID5316931 | TSHR    | predicted |
| CID5316931 | MAPT    | predicted |
| CID5316931 | CYP3A4  | predicted |
| CID5316931 | CYP19A1 | predicted |
| CID5316931 | RAB9A   | predicted |
| CID5316931 | TP53    | predicted |
| CID5316931 | PTPN1   | predicted |
| CID5316931 | PPARG   | predicted |
| CID5316931 | SMN1    | predicted |
| CID5316931 | ALDH1A1 | predicted |
| CID5316931 | TDP1    | predicted |
| CID5316931 | NPC1    | predicted |
| CID5316931 | KMT2A   | predicted |
| CID5316931 | ALOX15  | predicted |
| CID5316931 | MAPK1   | predicted |
| CID5316931 | ACHE    | predicted |
| CID5316931 | TRPV1   | predicted |
| CID5316931 | CNR2    | predicted |
| CID134203  | CYP3A4  | predicted |
| CID134203  | MAPT    | predicted |
| CID134203  | LMNA    | predicted |
| CID134203  | CYP19A1 | predicted |
| CID134203  | SLCO2B1 | predicted |
| CID134203  | TSHR    | predicted |
| CID134203  | TDP1    | predicted |
| CID134203  | PTPN1   | predicted |

|            |          |           |
|------------|----------|-----------|
| CID134203  | SMN1     | predicted |
| CID134203  | POLB     | predicted |
| CID134203  | APEX1    | predicted |
| CID134203  | ABCG2    | predicted |
| CID134203  | BACE1    | predicted |
| CID134203  | RAB9A    | predicted |
| CID134203  | MAPK1    | predicted |
| CID134203  | NPSR1    | predicted |
| CID134203  | ALDH1A1  | predicted |
| CID134203  | ACHE     | predicted |
| CID134203  | NPC1     | predicted |
| CID134203  | ALOX15   | predicted |
| CID5385074 | MAPT     | predicted |
| CID5385074 | CYP3A4   | predicted |
| CID5385074 | LMNA     | predicted |
| CID5385074 | RAB9A    | predicted |
| CID5385074 | IL2      | predicted |
| CID5385074 | NPC1     | predicted |
| CID5385074 | TDP1     | predicted |
| CID5385074 | AKR1B1   | predicted |
| CID5385074 | CYP19A1  | predicted |
| CID5385074 | SMN1     | predicted |
| CID5385074 | APEX1    | predicted |
| CID5385074 | POLB     | predicted |
| CID5385074 | ABCG2    | predicted |
| CID5385074 | L3MBTL1  | predicted |
| CID5385074 | HSP90AA1 | predicted |
| CID5385074 | PTPN1    | predicted |
| CID5385074 | TSHR     | predicted |
| CID5385074 | BACE1    | predicted |
| CID5385074 | PSIP1    | predicted |
| CID5385074 | ALDH1A1  | predicted |
| CID6063288 | MAPT     | predicted |
| CID6063288 | CYP3A4   | predicted |
| CID6063288 | RAB9A    | predicted |
| CID6063288 | TDP1     | predicted |
| CID6063288 | NPC1     | predicted |
| CID6063288 | ABCG2    | predicted |
| CID6063288 | LMNA     | predicted |
| CID6063288 | BACE1    | predicted |
| CID6063288 | ALDH1A1  | predicted |
| CID6063288 | SMN1     | predicted |
| CID6063288 | IL2      | predicted |
| CID6063288 | CYP19A1  | predicted |
| CID6063288 | AKR1B1   | predicted |
| CID6063288 | KDM4E    | predicted |
| CID6063288 | POLB     | predicted |
| CID6063288 | APEX1    | predicted |
| CID6063288 | KMT2A    | predicted |
| CID6063288 | MAOA     | predicted |
| CID6063288 | PTPN1    | predicted |
| CID6063288 | TSHR     | predicted |
| CID5320399 | CYP3A4   | predicted |
| CID5320399 | MAPT     | predicted |
| CID5320399 | ABCG2    | predicted |
| CID5320399 | MAOA     | predicted |
| CID5320399 | TP53     | predicted |
| CID5320399 | ALDH1A1  | predicted |



|             |          |           |
|-------------|----------|-----------|
| CID5320399  | TSHR     | predicted |
| CID5320399  | LMNA     | predicted |
| CID5320399  | NPC1     | predicted |
| CID5320399  | RAB9A    | predicted |
| CID5320399  | CA12     | predicted |
| CID5320399  | HPGD     | predicted |
| CID5320399  | CA9      | predicted |
| CID5320399  | CA1      | predicted |
| CID5320399  | CYP19A1  | predicted |
| CID5320399  | TDP1     | predicted |
| CID5320399  | BACE1    | predicted |
| CID5320399  | CYP2C19  | predicted |
| CID5320399  | KMT2A    | predicted |
| CID5320399  | KDM4E    | predicted |
| CID5281665  | MAPT     | predicted |
| CID5281665  | CYP3A4   | predicted |
| CID5281665  | ABCG2    | predicted |
| CID5281665  | RAB9A    | predicted |
| CID5281665  | CYP19A1  | predicted |
| CID5281665  | MAOA     | predicted |
| CID5281665  | BACE1    | predicted |
| CID5281665  | NPC1     | predicted |
| CID5281665  | KMT2A    | predicted |
| CID5281665  | ALDH1A1  | predicted |
| CID5281665  | ABCB1    | predicted |
| CID5281665  | MAPK1    | predicted |
| CID5281665  | KDM4E    | predicted |
| CID5281665  | TDP1     | predicted |
| CID5281665  | F3       | predicted |
| CID5281665  | ADORA3   | predicted |
| CID5281665  | TP53     | predicted |
| CID5281665  | CA1      | predicted |
| CID5281665  | TERT     | predicted |
| CID5281665  | ACHE     | predicted |
| CID76211590 | LMNA     | predicted |
| CID76211590 | CA1      | predicted |
| CID76211590 | TDP1     | predicted |
| CID76211590 | MAPT     | predicted |
| CID76211590 | CA12     | predicted |
| CID76211590 | CA9      | predicted |
| CID76211590 | CYP3A4   | predicted |
| CID76211590 | CA2      | predicted |
| CID76211590 | IL2      | predicted |
| CID76211590 | AKR1B1   | predicted |
| CID76211590 | TSHR     | predicted |
| CID76211590 | LCK      | predicted |
| CID76211590 | RAB9A    | predicted |
| CID76211590 | NPC1     | predicted |
| CID76211590 | POLB     | predicted |
| CID76211590 | SMN1     | predicted |
| CID76211590 | CYP19A1  | predicted |
| CID76211590 | HSP90AA1 | predicted |
| CID76211590 | APEX1    | predicted |
| CID76211590 | L3MBTL1  | predicted |
| CID637759   | CA3      | predicted |
| CID637759   | AHR      | predicted |
| CID637759   | CA4      | predicted |
| CID637759   | CA9      | predicted |

|             |          |           |
|-------------|----------|-----------|
| CID637759   | NOS2     | predicted |
| CID637759   | CA12     | predicted |
| CID637759   | CHRNA7   | predicted |
| CID637759   | GAA      | predicted |
| CID637759   | TDP2     | predicted |
| CID637759   | CA2      | predicted |
| CID637759   | CASP7    | predicted |
| CID637759   | CASP1    | predicted |
| CID637759   | NFKB1    | predicted |
| CID637759   | TGM2     | predicted |
| CID637759   | HSD17B10 | predicted |
| CID637759   | KMT2A    | predicted |
| CID637759   | HPGD     | predicted |
| CID637759   | THRB     | predicted |
| CID637759   | THPO     | predicted |
| CID637759   | ALDH1A1  | predicted |
| CID637759   | GLA      | Known     |
| CID338716   | CYP3A4   | predicted |
| CID338716   | MAPT     | predicted |
| CID338716   | LMNA     | predicted |
| CID338716   | ABCG2    | predicted |
| CID338716   | NPC1     | predicted |
| CID338716   | TDP1     | predicted |
| CID338716   | RAB9A    | predicted |
| CID338716   | AKR1B1   | predicted |
| CID338716   | L3MBTL1  | predicted |
| CID338716   | IL2      | predicted |
| CID338716   | TSHR     | predicted |
| CID338716   | CYP19A1  | predicted |
| CID338716   | SMN1     | predicted |
| CID338716   | POLB     | predicted |
| CID338716   | KMT2A    | predicted |
| CID338716   | ALOX5    | predicted |
| CID338716   | APEX1    | predicted |
| CID338716   | BACE1    | predicted |
| CID338716   | MAPK1    | predicted |
| CID338716   | CYP1A2   | predicted |
| CID1465551  | MAPT     | predicted |
| CID1465551  | CYP3A4   | predicted |
| CID1465551  | LMNA     | predicted |
| CID1465551  | ABCG2    | predicted |
| CID1465551  | TDP1     | predicted |
| CID1465551  | RAB9A    | predicted |
| CID1465551  | NPC1     | predicted |
| CID1465551  | SMN1     | predicted |
| CID1465551  | TSHR     | predicted |
| CID1465551  | BACE1    | predicted |
| CID1465551  | KDM4E    | predicted |
| CID1465551  | CYP19A1  | predicted |
| CID1465551  | ALDH1A1  | predicted |
| CID1465551  | AKR1B1   | predicted |
| CID1465551  | KMT2A    | predicted |
| CID1465551  | POLB     | predicted |
| CID1465551  | PTPN1    | predicted |
| CID1465551  | TP53     | predicted |
| CID1465551  | MAPK1    | predicted |
| CID1465551  | GAA      | predicted |
| CID12004622 | MAPT     | predicted |

|             |          |           |
|-------------|----------|-----------|
| CID12004622 | CYP3A4   | predicted |
| CID12004622 | LMNA     | predicted |
| CID12004622 | ABCG2    | predicted |
| CID12004622 | TDP1     | predicted |
| CID12004622 | RAB9A    | predicted |
| CID12004622 | NPC1     | predicted |
| CID12004622 | SMN1     | predicted |
| CID12004622 | TSHR     | predicted |
| CID12004622 | BACE1    | predicted |
| CID12004622 | KDM4E    | predicted |
| CID12004622 | CYP19A1  | predicted |
| CID12004622 | ALDH1A1  | predicted |
| CID12004622 | AKR1B1   | predicted |
| CID12004622 | KMT2A    | predicted |
| CID12004622 | POLB     | predicted |
| CID12004622 | PTPN1    | predicted |
| CID12004622 | TP53     | predicted |
| CID12004622 | MAPK1    | predicted |
| CID12004622 | GAA      | predicted |
| CID5281605  | CYP1A2   | predicted |
| CID5281605  | CYP3A4   | predicted |
| CID5281605  | TDP1     | predicted |
| CID5281605  | LMNA     | predicted |
| CID5281605  | ALDH1A1  | predicted |
| CID5281605  | MGAM     | predicted |
| CID5281605  | CDK5     | predicted |
| CID5281605  | POLB     | predicted |
| CID5281605  | KMT2A    | predicted |
| CID5281605  | HIF1A    | predicted |
| CID5281605  | UGT1A9   | predicted |
| CID5281605  | CYP2D6   | predicted |
| CID5281605  | PFKFB3   | predicted |
| CID5281605  | UGT1A7   | predicted |
| CID5281605  | MAPK1    | predicted |
| CID5281605  | GANAB    | predicted |
| CID5281605  | CDK2     | predicted |
| CID5281605  | L3MBTL1  | predicted |
| CID5281605  | THPO     | predicted |
| CID5281605  | PIM1     | predicted |
| CID5281605  | HSD17B3  | Known     |
| CID5281605  | CYP1A1   | Known     |
| CID5281605  | CYP1B1   | Known     |
| CID5281605  | ALOX15   | Known     |
| CID5281605  | HSD17B10 | Known     |
| CID5281605  | HPGD     | Known     |
| CID5281605  | UGT1A1   | Known     |
| CID5281605  | SI       | Known     |
| CID5281605  | XDH      | Known     |
| CID5281605  | MAPT     | Known     |
| CID5281605  | TP53     | Known     |
| CID5281605  | ALOX12   | Known     |
| CID5281605  | KDM4E    | Known     |
| CID5281605  | CYP2C9   | Known     |
| CID5281605  | CYP2C19  | Known     |
| CID5281605  | ALOX5    | Known     |
| CID5281605  | RECQL    | Known     |
| CID5281605  | APEX1    | Known     |
| CID5281605  | USP2     | Known     |

|             |          |           |
|-------------|----------|-----------|
| CID5281605  | CDK1     | Known     |
| CID5281605  | BLM      | Known     |
| CID13845930 | CYP3A4   | predicted |
| CID13845930 | LMNA     | predicted |
| CID13845930 | MAPT     | predicted |
| CID13845930 | AKR1B1   | predicted |
| CID13845930 | TDP1     | predicted |
| CID13845930 | IL2      | predicted |
| CID13845930 | RAB9A    | predicted |
| CID13845930 | POLB     | predicted |
| CID13845930 | APEX1    | predicted |
| CID13845930 | NPC1     | predicted |
| CID13845930 | TSHR     | predicted |
| CID13845930 | SMN1     | predicted |
| CID13845930 | GAA      | predicted |
| CID13845930 | HSP90AA1 | predicted |
| CID13845930 | PSIP1    | predicted |
| CID13845930 | KDM4E    | predicted |
| CID13845930 | ALOX15   | predicted |
| CID13845930 | CYP19A1  | predicted |
| CID13845930 | L3MBTL1  | predicted |
| CID13845930 | PTPN1    | predicted |
| CID369636   | CYP3A4   | predicted |
| CID369636   | MAPT     | predicted |
| CID369636   | LMNA     | predicted |
| CID369636   | RAB9A    | predicted |
| CID369636   | CYP19A1  | predicted |
| CID369636   | NPC1     | predicted |
| CID369636   | TDP1     | predicted |
| CID369636   | IL2      | predicted |
| CID369636   | AKR1B1   | predicted |
| CID369636   | ABCG2    | predicted |
| CID369636   | SMN1     | predicted |
| CID369636   | POLB     | predicted |
| CID369636   | APEX1    | predicted |
| CID369636   | L3MBTL1  | predicted |
| CID369636   | TSHR     | predicted |
| CID369636   | ALDH1A1  | predicted |
| CID369636   | HSP90AA1 | predicted |
| CID369636   | PTPN1    | predicted |
| CID369636   | BACE1    | predicted |
| CID369636   | ACHE     | predicted |
| CID558173   | PTPN1    | predicted |
| CID558173   | LMNA     | predicted |
| CID558173   | MAPT     | predicted |
| CID558173   | TSHR     | predicted |
| CID558173   | CYP19A1  | predicted |
| CID558173   | CYP3A4   | predicted |
| CID558173   | ALOX5    | predicted |
| CID558173   | MPEG1    | predicted |
| CID558173   | ALDH1A1  | predicted |
| CID558173   | RAB9A    | predicted |
| CID558173   | TDP1     | predicted |
| CID558173   | ALOX15   | predicted |
| CID558173   | SMN1     | predicted |
| CID558173   | ACHE     | predicted |
| CID558173   | PPARG    | predicted |
| CID558173   | KMT2A    | predicted |

|             |          |           |
|-------------|----------|-----------|
| CID558173   | GPBAR1   | predicted |
| CID558173   | MAPK1    | predicted |
| CID558173   | TNF      | predicted |
| CID558173   | NPC1     | predicted |
| CID64982    | MAPT     | predicted |
| CID64982    | CYP3A4   | predicted |
| CID64982    | LMNA     | predicted |
| CID64982    | ABCG2    | predicted |
| CID64982    | TDP1     | predicted |
| CID64982    | RAB9A    | predicted |
| CID64982    | NPC1     | predicted |
| CID64982    | SMN1     | predicted |
| CID64982    | BACE1    | predicted |
| CID64982    | TSHR     | predicted |
| CID64982    | KDM4E    | predicted |
| CID64982    | CYP19A1  | predicted |
| CID64982    | AKR1B1   | predicted |
| CID64982    | POLB     | predicted |
| CID64982    | ALDH1A1  | predicted |
| CID64982    | PTPN1    | predicted |
| CID64982    | KMT2A    | predicted |
| CID64982    | TP53     | predicted |
| CID64982    | GAA      | predicted |
| CID64982    | MAPK1    | predicted |
| CID162464   | CYP3A4   | predicted |
| CID162464   | MAPT     | predicted |
| CID162464   | ABCG2    | predicted |
| CID162464   | CYP19A1  | predicted |
| CID162464   | MAOA     | predicted |
| CID162464   | BACE1    | predicted |
| CID162464   | RAB9A    | predicted |
| CID162464   | NPC1     | predicted |
| CID162464   | KDM4E    | predicted |
| CID162464   | TDP1     | predicted |
| CID162464   | ABCB1    | predicted |
| CID162464   | ALDH1A1  | predicted |
| CID162464   | KMT2A    | predicted |
| CID162464   | MAPK1    | predicted |
| CID162464   | TP53     | predicted |
| CID162464   | ALOX15   | predicted |
| CID162464   | ACHE     | predicted |
| CID162464   | LMNA     | predicted |
| CID162464   | CTSV     | predicted |
| CID162464   | CYP2C19  | predicted |
| CID13892721 | LMNA     | predicted |
| CID13892721 | PTPN1    | predicted |
| CID13892721 | MAPT     | predicted |
| CID13892721 | CYP3A4   | predicted |
| CID13892721 | TSHR     | predicted |
| CID13892721 | RAB9A    | predicted |
| CID13892721 | SMN1     | predicted |
| CID13892721 | TDP1     | predicted |
| CID13892721 | NPC1     | predicted |
| CID13892721 | HSP90AA1 | predicted |
| CID13892721 | IL2      | predicted |
| CID13892721 | AKR1B1   | predicted |
| CID13892721 | TNF      | predicted |
| CID13892721 | GPBAR1   | predicted |

|             |          |           |
|-------------|----------|-----------|
| CID13892721 | L3MBTL1  | predicted |
| CID13892721 | ALDH1A1  | predicted |
| CID13892721 | KMT2A    | predicted |
| CID13892721 | HSD11B1  | predicted |
| CID13892721 | CYP19A1  | predicted |
| CID13892721 | POLB     | predicted |
| CID161271   | CYP3A4   | predicted |
| CID161271   | MAPT     | predicted |
| CID161271   | ABCG2    | predicted |
| CID161271   | RAB9A    | predicted |
| CID161271   | NPC1     | predicted |
| CID161271   | ABCB1    | predicted |
| CID161271   | KMT2A    | predicted |
| CID161271   | MAOA     | predicted |
| CID161271   | ADORA3   | predicted |
| CID161271   | ALDH1A1  | predicted |
| CID161271   | CYP19A1  | predicted |
| CID161271   | BACE1    | predicted |
| CID161271   | F3       | predicted |
| CID161271   | KDM4E    | predicted |
| CID161271   | TDP1     | predicted |
| CID161271   | TP53     | predicted |
| CID161271   | MAPK1    | predicted |
| CID161271   | CA1      | predicted |
| CID161271   | ACHE     | predicted |
| CID161271   | CYP2C19  | predicted |
| CID78193543 | MAPT     | predicted |
| CID78193543 | CYP3A4   | predicted |
| CID78193543 | LMNA     | predicted |
| CID78193543 | TDP1     | predicted |
| CID78193543 | CYP19A1  | predicted |
| CID78193543 | SMN1     | predicted |
| CID78193543 | TSHR     | predicted |
| CID78193543 | KDM4E    | predicted |
| CID78193543 | HSD17B10 | predicted |
| CID78193543 | PTPN1    | predicted |
| CID78193543 | KMT2A    | predicted |
| CID78193543 | RAB9A    | predicted |
| CID78193543 | POLB     | predicted |
| CID78193543 | NPC1     | predicted |
| CID78193543 | GAA      | predicted |
| CID78193543 | ALOX15   | predicted |
| CID78193543 | ALDH1A1  | predicted |
| CID78193543 | MAPK1    | predicted |
| CID78193543 | APEX1    | predicted |
| CID78193543 | BACE1    | predicted |
| CID6171347  | LMNA     | predicted |
| CID6171347  | MAPT     | predicted |
| CID6171347  | CYP3A4   | predicted |
| CID6171347  | PTPN1    | predicted |
| CID6171347  | SMN1     | predicted |
| CID6171347  | TSHR     | predicted |
| CID6171347  | TDP1     | predicted |
| CID6171347  | AKR1B10  | predicted |
| CID6171347  | RAB9A    | predicted |
| CID6171347  | AKR1B1   | predicted |
| CID6171347  | NPC1     | predicted |
| CID6171347  | KMT2A    | predicted |

|            |         |           |
|------------|---------|-----------|
| CID6171347 | TP53    | predicted |
| CID6171347 | CYP19A1 | predicted |
| CID6171347 | ALDH1A1 | predicted |
| CID6171347 | KDM4E   | predicted |
| CID6171347 | CA9     | predicted |
| CID6171347 | CA1     | predicted |
| CID6171347 | NFKB1   | predicted |
| CID6171347 | MAPK1   | predicted |
| CID22015   | TRPA1   | predicted |
| CID22015   | PTGS1   | predicted |
| CID22015   | MAPT    | predicted |
| CID22015   | CYP2A6  | predicted |
| CID22015   | ALDH1A1 | predicted |
| CID22015   | CYP19A1 | predicted |
| CID22015   | PPARG   | predicted |
| CID22015   | ELANE   | predicted |
| CID22015   | ACHE    | predicted |
| CID22015   | TDP1    | predicted |
| CID22015   | TSHR    | predicted |
| CID22015   | PTPN1   | predicted |
| CID22015   | KMT2A   | predicted |
| CID22015   | RAD51   | predicted |
| CID22015   | CYP3A4  | predicted |
| CID22015   | MAPK1   | predicted |
| CID22015   | LMNA    | predicted |
| CID22015   | MAOA    | predicted |
| CID22015   | ESR1    | predicted |
| CID22015   | SLC37A4 | predicted |
| CID10409   | TSHR    | predicted |
| CID10409   | LMNA    | predicted |
| CID10409   | MPEG1   | predicted |
| CID10409   | HMGCR   | predicted |
| CID10409   | ALOX5   | predicted |
| CID10409   | FAAH    | predicted |
| CID10409   | TRPV1   | predicted |
| CID10409   | PTPN1   | predicted |
| CID10409   | PPARG   | predicted |
| CID10409   | MAPT    | predicted |
| CID10409   | FABP3   | predicted |
| CID10409   | CYP3A4  | predicted |
| CID10409   | PPARA   | predicted |
| CID10409   | OXER1   | predicted |
| CID10409   | PPARD   | predicted |
| CID10409   | ALDH1A1 | predicted |
| CID10409   | CYP19A1 | predicted |
| CID10409   | NFKB1   | predicted |
| CID10409   | GPBAR1  | predicted |
| CID10409   | ACHE    | predicted |
| CID5281628 | MAPT    | predicted |
| CID5281628 | RELA    | predicted |
| CID5281628 | LMNA    | predicted |
| CID5281628 | TP53    | predicted |
| CID5281628 | XBP1    | predicted |
| CID5281628 | KMT2A   | predicted |
| CID5281628 | TNKS    | predicted |
| CID5281628 | KDM4E   | predicted |
| CID5281628 | MITF    | predicted |
| CID5281628 | NFKB1   | predicted |

|             |         |           |
|-------------|---------|-----------|
| CID5281628  | SMN1    | predicted |
| CID5281628  | ABCG2   | predicted |
| CID5281628  | CALM1   | predicted |
| CID5281628  | IL2     | predicted |
| CID5281628  | WEE1    | predicted |
| CID5281628  | AR      | predicted |
| CID5281628  | NR3C1   | predicted |
| CID5281628  | ALDH2   | predicted |
| CID5281628  | KLK7    | predicted |
| CID5281628  | NPSR1   | predicted |
| CID5281628  | RAB9A   | Known     |
| CID5281628  | NPC1    | Known     |
| CID21862951 | LMNA    | predicted |
| CID21862951 | TSHR    | predicted |
| CID21862951 | PTPN1   | predicted |
| CID21862951 | MAPT    | predicted |
| CID21862951 | CYP3A4  | predicted |
| CID21862951 | CYP19A1 | predicted |
| CID21862951 | GPBAR1  | predicted |
| CID21862951 | HMGCR   | predicted |
| CID21862951 | SMN1    | predicted |
| CID21862951 | ALDH1A1 | predicted |
| CID21862951 | TNF     | predicted |
| CID21862951 | PPARG   | predicted |
| CID21862951 | ALOX5   | predicted |
| CID21862951 | RAB9A   | predicted |
| CID21862951 | SHBG    | predicted |
| CID21862951 | TDP1    | predicted |
| CID21862951 | MPEG1   | predicted |
| CID21862951 | HSD11B1 | predicted |
| CID21862951 | TRPV1   | predicted |
| CID21862951 | KMT2A   | predicted |
| CID102861   | LMNA    | predicted |
| CID102861   | TSHR    | predicted |
| CID102861   | PTPN1   | predicted |
| CID102861   | MAPT    | predicted |
| CID102861   | HMGCR   | predicted |
| CID102861   | CYP3A4  | predicted |
| CID102861   | GPBAR1  | predicted |
| CID102861   | CYP19A1 | predicted |
| CID102861   | SMN1    | predicted |
| CID102861   | PPARG   | predicted |
| CID102861   | TNF     | predicted |
| CID102861   | ALOX5   | predicted |
| CID102861   | MPEG1   | predicted |
| CID102861   | ALDH1A1 | predicted |
| CID102861   | SHBG    | predicted |
| CID102861   | TRPV1   | predicted |
| CID102861   | TDP1    | predicted |
| CID102861   | RAB9A   | predicted |
| CID102861   | PTGIR   | predicted |
| CID102861   | FAAH    | predicted |
| CID11569    | MAPK1   | predicted |
| CID11569    | ACHE    | predicted |
| CID11569    | MAPT    | predicted |
| CID11569    | CYP3A4  | predicted |
| CID11569    | ALDH1A1 | predicted |
| CID11569    | TSHR    | predicted |



|           |          |           |
|-----------|----------|-----------|
| CID11569  | CNR1     | predicted |
| CID11569  | DHODH    | predicted |
| CID11569  | SLC6A4   | predicted |
| CID11569  | CYP2A6   | predicted |
| CID11569  | RAB9A    | predicted |
| CID11569  | LMNA     | predicted |
| CID11569  | OPRD1    | predicted |
| CID11569  | PARP1    | predicted |
| CID11569  | OPRM1    | predicted |
| CID11569  | TDP1     | predicted |
| CID11569  | SLC6A2   | predicted |
| CID11569  | NPC1     | predicted |
| CID11569  | OPRK1    | predicted |
| CID11569  | MAOA     | predicted |
| CID31161  | MAPT     | predicted |
| CID31161  | CYP3A4   | predicted |
| CID31161  | ABCG2    | predicted |
| CID31161  | CYP19A1  | predicted |
| CID31161  | MAOA     | predicted |
| CID31161  | BACE1    | predicted |
| CID31161  | RAB9A    | predicted |
| CID31161  | KDM4E    | predicted |
| CID31161  | NPC1     | predicted |
| CID31161  | TDP1     | predicted |
| CID31161  | ALDH1A1  | predicted |
| CID31161  | ALOX15   | predicted |
| CID31161  | KMT2A    | predicted |
| CID31161  | MAPK1    | predicted |
| CID31161  | ABCB1    | predicted |
| CID31161  | HSD17B10 | predicted |
| CID31161  | TP53     | predicted |
| CID31161  | LMNA     | predicted |
| CID31161  | ACHE     | predicted |
| CID31161  | POLB     | predicted |
| CID60968  | LMNA     | predicted |
| CID60968  | PTPN1    | predicted |
| CID60968  | MAPT     | predicted |
| CID60968  | TSHR     | predicted |
| CID60968  | CYP3A4   | predicted |
| CID60968  | RAB9A    | predicted |
| CID60968  | GPBAR1   | predicted |
| CID60968  | SMN1     | predicted |
| CID60968  | NPSR1    | predicted |
| CID60968  | NPC1     | predicted |
| CID60968  | CYP19A1  | predicted |
| CID60968  | HSD11B1  | predicted |
| CID60968  | KMT2A    | predicted |
| CID60968  | TDP1     | predicted |
| CID60968  | XBP1     | predicted |
| CID60968  | HSP90AA1 | predicted |
| CID60968  | ALDH1A1  | predicted |
| CID60968  | AKR1B10  | predicted |
| CID60968  | SHBG     | predicted |
| CID60968  | HTT      | predicted |
| CID442662 | CYP3A4   | predicted |
| CID442662 | MAPT     | predicted |
| CID442662 | ABCG2    | predicted |
| CID442662 | CYP19A1  | predicted |

|           |          |           |
|-----------|----------|-----------|
| CID442662 | MAOA     | predicted |
| CID442662 | RAB9A    | predicted |
| CID442662 | BACE1    | predicted |
| CID442662 | NPC1     | predicted |
| CID442662 | TDP1     | predicted |
| CID442662 | KMT2A    | predicted |
| CID442662 | ALDH1A1  | predicted |
| CID442662 | KDM4E    | predicted |
| CID442662 | ABCB1    | predicted |
| CID442662 | MAPK1    | predicted |
| CID442662 | TP53     | predicted |
| CID442662 | LMNA     | predicted |
| CID442662 | CTSV     | predicted |
| CID442662 | ALOX15   | predicted |
| CID442662 | ACHE     | predicted |
| CID442662 | CYP2C19  | predicted |
| CID91458  | LMNA     | predicted |
| CID91458  | IL2      | predicted |
| CID91458  | CYP3A4   | predicted |
| CID91458  | MAPT     | predicted |
| CID91458  | HSP90AA1 | predicted |
| CID91458  | RAB9A    | predicted |
| CID91458  | AKR1B1   | predicted |
| CID91458  | TDP1     | predicted |
| CID91458  | SMN1     | predicted |
| CID91458  | PTPN1    | predicted |
| CID91458  | TSHR     | predicted |
| CID91458  | NPC1     | predicted |
| CID91458  | L3MBTL1  | predicted |
| CID91458  | POLB     | predicted |
| CID91458  | TNF      | predicted |
| CID91458  | APEX1    | predicted |
| CID91458  | PSIP1    | predicted |
| CID91458  | CYP19A1  | predicted |
| CID91458  | ALDH1A1  | predicted |
| CID91458  | BACE1    | predicted |
| CID442424 | LMNA     | predicted |
| CID442424 | PTPN1    | predicted |
| CID442424 | MAPT     | predicted |
| CID442424 | TSHR     | predicted |
| CID442424 | CYP3A4   | predicted |
| CID442424 | SMN1     | predicted |
| CID442424 | TDP1     | predicted |
| CID442424 | ALDH1A1  | predicted |
| CID442424 | RAB9A    | predicted |
| CID442424 | KMT2A    | predicted |
| CID442424 | CYP19A1  | predicted |
| CID442424 | NPC1     | predicted |
| CID442424 | PPARG    | predicted |
| CID442424 | GPBAR1   | predicted |
| CID442424 | CA1      | predicted |
| CID442424 | TP53     | predicted |
| CID442424 | HSD11B1  | predicted |
| CID442424 | CA9      | predicted |
| CID442424 | AKR1B10  | predicted |
| CID442424 | ACHE     | predicted |
| CID107848 | LMNA     | predicted |
| CID107848 | CYP3A4   | predicted |

|           |          |           |
|-----------|----------|-----------|
| CID107848 | MAPT     | predicted |
| CID107848 | PTPN1    | predicted |
| CID107848 | TSHR     | predicted |
| CID107848 | TDP1     | predicted |
| CID107848 | SMN1     | predicted |
| CID107848 | RAB9A    | predicted |
| CID107848 | IL2      | predicted |
| CID107848 | NPC1     | predicted |
| CID107848 | AKR1B1   | predicted |
| CID107848 | HSP90AA1 | predicted |
| CID107848 | ALDH1A1  | predicted |
| CID107848 | L3MBTL1  | predicted |
| CID107848 | POLB     | predicted |
| CID107848 | KMT2A    | predicted |
| CID107848 | TNF      | predicted |
| CID107848 | CYP19A1  | predicted |
| CID107848 | CA1      | predicted |
| CID107848 | CA9      | predicted |
| CID443354 | LMNA     | predicted |
| CID443354 | PTPN1    | predicted |
| CID443354 | CYP3A4   | predicted |
| CID443354 | MAPT     | predicted |
| CID443354 | TSHR     | predicted |
| CID443354 | TDP1     | predicted |
| CID443354 | SMN1     | predicted |
| CID443354 | RAB9A    | predicted |
| CID443354 | IL2      | predicted |
| CID443354 | AKR1B1   | predicted |
| CID443354 | HSP90AA1 | predicted |
| CID443354 | NPC1     | predicted |
| CID443354 | L3MBTL1  | predicted |
| CID443354 | TNF      | predicted |
| CID443354 | POLB     | predicted |
| CID443354 | ALDH1A1  | predicted |
| CID443354 | CYP19A1  | predicted |
| CID443354 | KMT2A    | predicted |
| CID443354 | GPBAR1   | predicted |
| CID443354 | HSD11B1  | predicted |
| CID73399  | CYP3A4   | predicted |
| CID73399  | MAPT     | predicted |
| CID73399  | CYP19A1  | predicted |
| CID73399  | LMNA     | predicted |
| CID73399  | SLCO2B1  | predicted |
| CID73399  | TDP1     | predicted |
| CID73399  | TSHR     | predicted |
| CID73399  | PTPN1    | predicted |
| CID73399  | ABCG2    | predicted |
| CID73399  | SMN1     | predicted |
| CID73399  | BACE1    | predicted |
| CID73399  | POLB     | predicted |
| CID73399  | APEX1    | predicted |
| CID73399  | RAB9A    | predicted |
| CID73399  | NPSR1    | predicted |
| CID73399  | MAPK1    | predicted |
| CID73399  | ACHE     | predicted |
| CID73399  | CYP2C9   | predicted |
| CID73399  | NPC1     | predicted |
| CID73399  | ALOX15   | predicted |

|            |          |           |
|------------|----------|-----------|
| CID23340   | LMNA     | predicted |
| CID23340   | PTPN1    | predicted |
| CID23340   | MAPT     | predicted |
| CID23340   | TSHR     | predicted |
| CID23340   | CYP3A4   | predicted |
| CID23340   | SMN1     | predicted |
| CID23340   | TDP1     | predicted |
| CID23340   | ALDH1A1  | predicted |
| CID23340   | RAB9A    | predicted |
| CID23340   | KMT2A    | predicted |
| CID23340   | CYP19A1  | predicted |
| CID23340   | NPC1     | predicted |
| CID23340   | PPARG    | predicted |
| CID23340   | GPBAR1   | predicted |
| CID23340   | CA1      | predicted |
| CID23340   | TP53     | predicted |
| CID23340   | HSD11B1  | predicted |
| CID23340   | CA9      | predicted |
| CID23340   | AKR1B10  | predicted |
| CID23340   | ACHE     | predicted |
| CID5281862 | TSHR     | predicted |
| CID5281862 | LMNA     | predicted |
| CID5281862 | MAPT     | predicted |
| CID5281862 | CYP3A4   | predicted |
| CID5281862 | CNR2     | predicted |
| CID5281862 | TRPV1    | predicted |
| CID5281862 | CNR1     | predicted |
| CID5281862 | ALOX5    | predicted |
| CID5281862 | PPARG    | predicted |
| CID5281862 | FAAH     | predicted |
| CID5281862 | HMGCR    | predicted |
| CID5281862 | ALDH1A1  | predicted |
| CID5281862 | MPEG1    | predicted |
| CID5281862 | ACHE     | predicted |
| CID5281862 | PTPN1    | predicted |
| CID5281862 | ALOX15   | predicted |
| CID5281862 | MAOA     | predicted |
| CID5281862 | TDP1     | predicted |
| CID5281862 | MAPK1    | predicted |
| CID5281862 | KMT2A    | predicted |
| CID3515873 | LMNA     | predicted |
| CID3515873 | CYP3A4   | predicted |
| CID3515873 | MAPT     | predicted |
| CID3515873 | PTPN1    | predicted |
| CID3515873 | TSHR     | predicted |
| CID3515873 | TDP1     | predicted |
| CID3515873 | SMN1     | predicted |
| CID3515873 | RAB9A    | predicted |
| CID3515873 | IL2      | predicted |
| CID3515873 | NPC1     | predicted |
| CID3515873 | AKR1B1   | predicted |
| CID3515873 | HSP90AA1 | predicted |
| CID3515873 | ALDH1A1  | predicted |
| CID3515873 | L3MBTL1  | predicted |
| CID3515873 | POLB     | predicted |
| CID3515873 | KMT2A    | predicted |
| CID3515873 | TNF      | predicted |
| CID3515873 | CYP19A1  | predicted |

|             |          |           |
|-------------|----------|-----------|
| CID3515873  | CA1      | predicted |
| CID3515873  | CA9      | predicted |
| CID14579    | CYP3A4   | predicted |
| CID14579    | LMNA     | predicted |
| CID14579    | MAPT     | predicted |
| CID14579    | CYP19A1  | predicted |
| CID14579    | TDP1     | predicted |
| CID14579    | SLCO2B1  | predicted |
| CID14579    | APEX1    | predicted |
| CID14579    | TSHR     | predicted |
| CID14579    | BACE1    | predicted |
| CID14579    | MAPK1    | predicted |
| CID14579    | POLB     | predicted |
| CID14579    | ABCG2    | predicted |
| CID14579    | SMN1     | predicted |
| CID14579    | RAB9A    | predicted |
| CID14579    | KDM4E    | predicted |
| CID14579    | ALDH1A1  | predicted |
| CID14579    | PTPN1    | predicted |
| CID14579    | NPC1     | predicted |
| CID14579    | NPSR1    | predicted |
| CID14579    | CYP1B1   | predicted |
| CID14179128 | LMNA     | predicted |
| CID14179128 | CYP3A4   | predicted |
| CID14179128 | MAPT     | predicted |
| CID14179128 | PTPN1    | predicted |
| CID14179128 | TSHR     | predicted |
| CID14179128 | TDP1     | predicted |
| CID14179128 | SMN1     | predicted |
| CID14179128 | RAB9A    | predicted |
| CID14179128 | IL2      | predicted |
| CID14179128 | NPC1     | predicted |
| CID14179128 | AKR1B1   | predicted |
| CID14179128 | HSP90AA1 | predicted |
| CID14179128 | ALDH1A1  | predicted |
| CID14179128 | L3MBTL1  | predicted |
| CID14179128 | POLB     | predicted |
| CID14179128 | KMT2A    | predicted |
| CID14179128 | TNF      | predicted |
| CID14179128 | CYP19A1  | predicted |
| CID14179128 | CA1      | predicted |
| CID14179128 | CA9      | predicted |
| CID130335   | TSHR     | predicted |
| CID130335   | LMNA     | predicted |
| CID130335   | MPEG1    | predicted |
| CID130335   | HMGCR    | predicted |
| CID130335   | FAAH     | predicted |
| CID130335   | ALOX5    | predicted |
| CID130335   | TRPV1    | predicted |
| CID130335   | MAPT     | predicted |
| CID130335   | CNR2     | predicted |
| CID130335   | PPARG    | predicted |
| CID130335   | CNR1     | predicted |
| CID130335   | CYP3A4   | predicted |
| CID130335   | PTPN1    | predicted |
| CID130335   | FABP3    | predicted |
| CID130335   | FNTA     | predicted |
| CID130335   | TDP1     | predicted |

|            |          |           |
|------------|----------|-----------|
| CID130335  | PPARA    | predicted |
| CID130335  | SHBG     | predicted |
| CID130335  | SMN1     | predicted |
| CID130335  | ACHE     | predicted |
| CID5320315 | PLK4     | predicted |
| CID5320315 | MKNK2    | predicted |
| CID5320315 | MAP3K8   | predicted |
| CID5320315 | ERBB2    | predicted |
| CID5320315 | CCND1    | predicted |
| CID5320315 | AXL      | predicted |
| CID5320315 | AURKA    | predicted |
| CID5320315 | AURKB    | predicted |
| CID5320315 | CDK5     | predicted |
| CID5320315 | EGFR     | predicted |
| CID5320315 | NOX4     | predicted |
| CID5320315 | CDK1     | predicted |
| CID5320315 | ABCC1    | predicted |
| CID5320315 | EPHB4    | predicted |
| CID5320315 | TEK      | predicted |
| CID5320315 | KARS     | predicted |
| CID5320315 | XDH      | predicted |
| CID5320315 | FLT4     | predicted |
| CID5320315 | INSR     | predicted |
| CID5320315 | PIM1     | predicted |
| CID5320315 | FLT3     | Known     |
| CID1549019 | LMNA     | predicted |
| CID1549019 | TSHR     | predicted |
| CID1549019 | MAPT     | predicted |
| CID1549019 | PTPN1    | predicted |
| CID1549019 | CYP3A4   | predicted |
| CID1549019 | ALOX5    | predicted |
| CID1549019 | ALDH1A1  | predicted |
| CID1549019 | MPEG1    | predicted |
| CID1549019 | PPARG    | predicted |
| CID1549019 | CYP19A1  | predicted |
| CID1549019 | TRPV1    | predicted |
| CID1549019 | RAB9A    | predicted |
| CID1549019 | SMN1     | predicted |
| CID1549019 | ABCG2    | predicted |
| CID1549019 | ACHE     | predicted |
| CID1549019 | KMT2A    | predicted |
| CID1549019 | GPBAR1   | predicted |
| CID1549019 | MAPK1    | predicted |
| CID1549019 | TP53     | predicted |
| CID1549019 | TDP1     | predicted |
| CID3515876 | LMNA     | predicted |
| CID3515876 | CYP3A4   | predicted |
| CID3515876 | PTPN1    | predicted |
| CID3515876 | MAPT     | predicted |
| CID3515876 | TSHR     | predicted |
| CID3515876 | TDP1     | predicted |
| CID3515876 | SMN1     | predicted |
| CID3515876 | RAB9A    | predicted |
| CID3515876 | IL2      | predicted |
| CID3515876 | NPC1     | predicted |
| CID3515876 | AKR1B1   | predicted |
| CID3515876 | HSP90AA1 | predicted |
| CID3515876 | ALDH1A1  | predicted |

|            |          |           |
|------------|----------|-----------|
| CID3515876 | L3MBTL1  | predicted |
| CID3515876 | TNF      | predicted |
| CID3515876 | POLB     | predicted |
| CID3515876 | KMT2A    | predicted |
| CID3515876 | CYP19A1  | predicted |
| CID3515876 | CA1      | predicted |
| CID3515876 | HSD11B1  | predicted |
| CID5317238 | MAPT     | predicted |
| CID5317238 | CYP3A4   | predicted |
| CID5317238 | LMNA     | predicted |
| CID5317238 | CA9      | predicted |
| CID5317238 | TSHR     | predicted |
| CID5317238 | TDP1     | predicted |
| CID5317238 | CA1      | predicted |
| CID5317238 | HCAR2    | predicted |
| CID5317238 | CA12     | predicted |
| CID5317238 | AKR1B1   | predicted |
| CID5317238 | CA7      | predicted |
| CID5317238 | CA2      | predicted |
| CID5317238 | RAB9A    | predicted |
| CID5317238 | CA14     | predicted |
| CID5317238 | ALDH1A1  | predicted |
| CID5317238 | TP53     | predicted |
| CID5317238 | KMT2A    | predicted |
| CID5317238 | SMN1     | predicted |
| CID5317238 | CYP19A1  | predicted |
| CID5317238 | HSD17B10 | predicted |
| CID233330  | LMNA     | predicted |
| CID233330  | CYP3A4   | predicted |
| CID233330  | MAPT     | predicted |
| CID233330  | SMN1     | predicted |
| CID233330  | TSHR     | predicted |
| CID233330  | PTPN1    | predicted |
| CID233330  | RAB9A    | predicted |
| CID233330  | HSP90AA1 | predicted |
| CID233330  | TDP1     | predicted |
| CID233330  | NPC1     | predicted |
| CID233330  | AKR1B1   | predicted |
| CID233330  | IL2      | predicted |
| CID233330  | ALDH1A1  | predicted |
| CID233330  | POLB     | predicted |
| CID233330  | KMT2A    | predicted |
| CID233330  | TP53     | predicted |
| CID233330  | L3MBTL1  | predicted |
| CID233330  | HTT      | predicted |
| CID233330  | TNF      | predicted |
| CID233330  | CYP19A1  | predicted |
| CID17000   | PTPN1    | predicted |
| CID17000   | LMNA     | predicted |
| CID17000   | GPBAR1   | predicted |
| CID17000   | TSHR     | predicted |
| CID17000   | TNF      | predicted |
| CID17000   | MAPT     | predicted |
| CID17000   | CYP3A4   | predicted |
| CID17000   | HSD11B1  | predicted |
| CID17000   | SHBG     | predicted |
| CID17000   | CYP19A1  | predicted |
| CID17000   | SMN1     | predicted |

|            |         |           |
|------------|---------|-----------|
| CID17000   | TDP1    | predicted |
| CID17000   | ALDH1A1 | predicted |
| CID17000   | RAB9A   | predicted |
| CID17000   | ALOX5   | predicted |
| CID17000   | CTSD    | predicted |
| CID17000   | KMT2A   | predicted |
| CID17000   | NPSR1   | predicted |
| CID17000   | NPC1    | predicted |
| CID17000   | MAPK1   | predicted |
| CID5316230 | DRD1    | predicted |
| CID5316230 | F3      | predicted |
| CID5316230 | DRD2    | predicted |
| CID5316230 | CYP3A4  | predicted |
| CID5316230 | CYP2D6  | predicted |
| CID5316230 | MAPT    | predicted |
| CID5316230 | LMNA    | predicted |
| CID5316230 | HTR1A   | predicted |
| CID5316230 | ACHE    | predicted |
| CID5316230 | CYP2C19 | predicted |
| CID5316230 | ALDH1A1 | predicted |
| CID5316230 | MAOA    | predicted |
| CID5316230 | TDP1    | predicted |
| CID5316230 | TSHR    | predicted |
| CID5316230 | CHRNA2  | predicted |
| CID5316230 | MAPK1   | predicted |
| CID5316230 | NPC1    | predicted |
| CID5316230 | RAB9A   | predicted |
| CID5316230 | KDM4E   | predicted |
| CID5316230 | SMN1    | predicted |
| CID3082134 | DRD1    | predicted |
| CID3082134 | F3      | predicted |
| CID3082134 | DRD2    | predicted |
| CID3082134 | CYP3A4  | predicted |
| CID3082134 | CYP2D6  | predicted |
| CID3082134 | MAPT    | predicted |
| CID3082134 | LMNA    | predicted |
| CID3082134 | HTR1A   | predicted |
| CID3082134 | ACHE    | predicted |
| CID3082134 | CYP2C19 | predicted |
| CID3082134 | ALDH1A1 | predicted |
| CID3082134 | MAOA    | predicted |
| CID3082134 | TDP1    | predicted |
| CID3082134 | TSHR    | predicted |
| CID3082134 | CHRNA2  | predicted |
| CID3082134 | MAPK1   | predicted |
| CID3082134 | NPC1    | predicted |
| CID3082134 | RAB9A   | predicted |
| CID3082134 | KDM4E   | predicted |
| CID3082134 | SMN1    | predicted |
| CID626931  | DRD1    | predicted |
| CID626931  | CYP3A4  | predicted |
| CID626931  | MAPT    | predicted |
| CID626931  | F3      | predicted |
| CID626931  | DRD2    | predicted |
| CID626931  | CYP2D6  | predicted |
| CID626931  | LMNA    | predicted |
| CID626931  | TDP1    | predicted |
| CID626931  | ALDH1A1 | predicted |



|            |          |           |
|------------|----------|-----------|
| CID626931  | ACHE     | predicted |
| CID626931  | TAAR1    | predicted |
| CID626931  | MAOA     | predicted |
| CID626931  | CYP2C19  | predicted |
| CID626931  | NPC1     | predicted |
| CID626931  | RAB9A    | predicted |
| CID626931  | KMT2A    | predicted |
| CID626931  | HTR1A    | predicted |
| CID626931  | USP2     | predicted |
| CID626931  | TSHR     | predicted |
| CID626931  | ABCG2    | predicted |
| CID30358   | DRD1     | predicted |
| CID30358   | CYP3A4   | predicted |
| CID30358   | CYP2D6   | predicted |
| CID30358   | F3       | predicted |
| CID30358   | DRD2     | predicted |
| CID30358   | MAPT     | predicted |
| CID30358   | CHRNA2   | predicted |
| CID30358   | LMNA     | predicted |
| CID30358   | TSHR     | predicted |
| CID30358   | CHRFAM7A | predicted |
| CID30358   | ACHE     | predicted |
| CID30358   | HTR2C    | predicted |
| CID30358   | HTR1A    | predicted |
| CID30358   | TAAR1    | predicted |
| CID30358   | HTR2A    | predicted |
| CID30358   | CYP2C19  | predicted |
| CID30358   | ALDH1A1  | predicted |
| CID30358   | TDP1     | predicted |
| CID30358   | HTR2B    | predicted |
| CID30358   | MAOA     | predicted |
| CID10149   | MAPT     | predicted |
| CID10149   | IDO1     | predicted |
| CID10149   | CYP3A4   | predicted |
| CID10149   | ABCG2    | predicted |
| CID10149   | KMT2A    | predicted |
| CID10149   | CYP19A1  | predicted |
| CID10149   | LMNA     | predicted |
| CID10149   | MAPK1    | predicted |
| CID10149   | MAOA     | predicted |
| CID10149   | RECQL    | predicted |
| CID10149   | ALDH1A1  | predicted |
| CID10149   | PDE4D    | predicted |
| CID10149   | RAB9A    | predicted |
| CID10149   | TDP1     | predicted |
| CID10149   | PTPN1    | predicted |
| CID10149   | NPC1     | predicted |
| CID10149   | TP53     | predicted |
| CID10149   | TRPA1    | predicted |
| CID10149   | SMN1     | predicted |
| CID10149   | MAOB     | predicted |
| CID5322092 | CYP3A4   | predicted |
| CID5322092 | MAPT     | predicted |
| CID5322092 | ABCG2    | predicted |
| CID5322092 | CA9      | predicted |
| CID5322092 | ALDH1A1  | predicted |
| CID5322092 | CA12     | predicted |
| CID5322092 | TDP1     | predicted |

|             |         |           |
|-------------|---------|-----------|
| CID5322092  | MAOB    | predicted |
| CID5322092  | ABCB1   | predicted |
| CID5322092  | CA1     | predicted |
| CID5322092  | LMNA    | predicted |
| CID5322092  | MAOA    | predicted |
| CID5322092  | CYP19A1 | predicted |
| CID5322092  | ALOX15  | predicted |
| CID5322092  | NPC1    | predicted |
| CID5322092  | CA7     | predicted |
| CID5322092  | BACE1   | predicted |
| CID5322092  | RAB9A   | predicted |
| CID5322092  | TP53    | predicted |
| CID5322092  | KMT2A   | predicted |
| CID5322059  | CYP3A4  | predicted |
| CID5322059  | MAPT    | predicted |
| CID5322059  | MAOA    | predicted |
| CID5322059  | ABCG2   | predicted |
| CID5322059  | ALDH1A1 | predicted |
| CID5322059  | LMNA    | predicted |
| CID5322059  | NPC1    | predicted |
| CID5322059  | RAB9A   | predicted |
| CID5322059  | CA9     | predicted |
| CID5322059  | TP53    | predicted |
| CID5322059  | CYP19A1 | predicted |
| CID5322059  | CA12    | predicted |
| CID5322059  | HPGD    | predicted |
| CID5322059  | TDP1    | predicted |
| CID5322059  | KMT2A   | predicted |
| CID5322059  | TSHR    | predicted |
| CID5322059  | KDM4E   | predicted |
| CID5322059  | ACHE    | predicted |
| CID5322059  | MAPK1   | predicted |
| CID5322059  | CTSV    | predicted |
| CID21721900 | CYP3A4  | predicted |
| CID21721900 | MAPT    | predicted |
| CID21721900 | ABCG2   | predicted |
| CID21721900 | CA9     | predicted |
| CID21721900 | ALDH1A1 | predicted |
| CID21721900 | CA12    | predicted |
| CID21721900 | MAOB    | predicted |
| CID21721900 | TDP1    | predicted |
| CID21721900 | CA1     | predicted |
| CID21721900 | ABCB1   | predicted |
| CID21721900 | MAOA    | predicted |
| CID21721900 | LMNA    | predicted |
| CID21721900 | NPC1    | predicted |
| CID21721900 | CA7     | predicted |
| CID21721900 | CYP19A1 | predicted |
| CID21721900 | ALOX15  | predicted |
| CID21721900 | RAB9A   | predicted |
| CID21721900 | BACE1   | predicted |
| CID21721900 | TP53    | predicted |
| CID21721900 | KMT2A   | predicted |
| CID21612893 | LMNA    | predicted |
| CID21612893 | TSHR    | predicted |
| CID21612893 | HMGCR   | predicted |
| CID21612893 | PTPN1   | predicted |
| CID21612893 | PPARG   | predicted |

|             |          |           |
|-------------|----------|-----------|
| CID21612893 | PPARA    | predicted |
| CID21612893 | MAPT     | predicted |
| CID21612893 | OXER1    | predicted |
| CID21612893 | CYP3A4   | predicted |
| CID21612893 | PPARD    | predicted |
| CID21612893 | ALDH1A1  | predicted |
| CID21612893 | TDP1     | predicted |
| CID21612893 | ALOX15   | predicted |
| CID21612893 | SMN1     | predicted |
| CID21612893 | KMT2A    | predicted |
| CID21612893 | ACHE     | predicted |
| CID21612893 | ALOX5    | predicted |
| CID21612893 | CYP19A1  | predicted |
| CID21612893 | NFKB1    | predicted |
| CID21612893 | MAPK1    | predicted |
| CID3084296  | CYP3A4   | predicted |
| CID3084296  | MAPT     | predicted |
| CID3084296  | LMNA     | predicted |
| CID3084296  | TSHR     | predicted |
| CID3084296  | TDP1     | predicted |
| CID3084296  | ABCG2    | predicted |
| CID3084296  | NPC1     | predicted |
| CID3084296  | RAB9A    | predicted |
| CID3084296  | IL2      | predicted |
| CID3084296  | SMN1     | predicted |
| CID3084296  | ALDH1A1  | predicted |
| CID3084296  | AKR1B1   | predicted |
| CID3084296  | POLB     | predicted |
| CID3084296  | TP53     | predicted |
| CID3084296  | ACHE     | predicted |
| CID3084296  | APEX1    | predicted |
| CID3084296  | MAPK1    | predicted |
| CID3084296  | KDM4E    | predicted |
| CID3084296  | HSP90AA1 | predicted |
| CID3084296  | L3MBTL1  | predicted |
| CID5322065  | CYP2C9   | predicted |
| CID5322065  | MPEG1    | predicted |
| CID5322065  | CYP2C19  | predicted |
| CID5322065  | NLRP3    | predicted |
| CID5322065  | NPC1     | predicted |
| CID5322065  | HPGD     | predicted |
| CID5322065  | AR       | predicted |
| CID5322065  | RAB9A    | predicted |
| CID5322065  | ALOX15   | predicted |
| CID5322065  | CYP3A4   | predicted |
| CID5322065  | HSD17B10 | predicted |
| CID5322065  | CYP19A1  | predicted |
| CID5322065  | KDM4E    | predicted |
| CID5322065  | CNR2     | predicted |
| CID5322065  | SMN1     | predicted |
| CID5322065  | TP53     | predicted |
| CID5322065  | MAPK1    | predicted |
| CID5322065  | SYK      | predicted |
| CID5322065  | XDH      | predicted |
| CID5322065  | CA9      | predicted |
| CID5322065  | PARP1    | Known     |
| CID5322065  | TNKS     | Known     |
| CID5322065  | TNKS2    | Known     |

|            |          |           |
|------------|----------|-----------|
| CID5322065 | ALOX5    | Known     |
| CID5284639 | MAPT     | predicted |
| CID5284639 | CYP3A4   | predicted |
| CID5284639 | RAB9A    | predicted |
| CID5284639 | NPC1     | predicted |
| CID5284639 | LMNA     | predicted |
| CID5284639 | IL2      | predicted |
| CID5284639 | TDP1     | predicted |
| CID5284639 | ABCG2    | predicted |
| CID5284639 | CYP19A1  | predicted |
| CID5284639 | AKR1B1   | predicted |
| CID5284639 | ALDH1A1  | predicted |
| CID5284639 | SMN1     | predicted |
| CID5284639 | POLB     | predicted |
| CID5284639 | BACE1    | predicted |
| CID5284639 | APEX1    | predicted |
| CID5284639 | TSHR     | predicted |
| CID5284639 | L3MBTL1  | predicted |
| CID5284639 | PTPN1    | predicted |
| CID5284639 | HSP90AA1 | predicted |
| CID5284639 | KMT2A    | predicted |
| CID610097  | MAOA     | predicted |
| CID610097  | MAPT     | predicted |
| CID610097  | CYP3A4   | predicted |
| CID610097  | LMNA     | predicted |
| CID610097  | PARP1    | predicted |
| CID610097  | DRD1     | predicted |
| CID610097  | KMT2A    | predicted |
| CID610097  | NPC1     | predicted |
| CID610097  | F3       | predicted |
| CID610097  | RAB9A    | predicted |
| CID610097  | ACHE     | predicted |
| CID610097  | MAPK1    | predicted |
| CID610097  | DRD2     | predicted |
| CID610097  | CYP2C19  | predicted |
| CID610097  | TDP1     | predicted |
| CID610097  | ALDH1A1  | predicted |
| CID610097  | MAP2K1   | predicted |
| CID610097  | SMN1     | predicted |
| CID610097  | CYP2D6   | predicted |
| CID610097  | TSHR     | predicted |
| CID72310   | CYP3A4   | predicted |
| CID72310   | MAPT     | predicted |
| CID72310   | ACHE     | predicted |
| CID72310   | LMNA     | predicted |
| CID72310   | SMN1     | predicted |
| CID72310   | NPC1     | predicted |
| CID72310   | DRD1     | predicted |
| CID72310   | RAB9A    | predicted |
| CID72310   | ABCG2    | predicted |
| CID72310   | CYP2C19  | predicted |
| CID72310   | TP53     | predicted |
| CID72310   | ALDH1A1  | predicted |
| CID72310   | TDP1     | predicted |
| CID72310   | TSHR     | predicted |
| CID72310   | KDM4E    | predicted |
| CID72310   | F3       | predicted |
| CID72310   | CTSV     | predicted |

|             |         |           |
|-------------|---------|-----------|
| CID72310    | UBE2I   | predicted |
| CID72310    | MAPK1   | predicted |
| CID72310    | CYP2D6  | predicted |
| CID73981561 | LMNA    | predicted |
| CID73981561 | MAPT    | predicted |
| CID73981561 | CYP3A4  | predicted |
| CID73981561 | TSHR    | predicted |
| CID73981561 | SMN1    | predicted |
| CID73981561 | PTPN1   | predicted |
| CID73981561 | KMT2A   | predicted |
| CID73981561 | TDP1    | predicted |
| CID73981561 | RAB9A   | predicted |
| CID73981561 | CYP2D6  | predicted |
| CID73981561 | NPC1    | predicted |
| CID73981561 | ALDH1A1 | predicted |
| CID73981561 | ACHE    | predicted |
| CID73981561 | NISCH   | predicted |
| CID73981561 | BCHE    | predicted |
| CID73981561 | HTR2C   | predicted |
| CID73981561 | AKR1B1  | predicted |
| CID73981561 | IL2     | predicted |
| CID73981561 | HTT     | predicted |
| CID73981561 | NFKB1   | predicted |
| CID5283637  | PTPN1   | predicted |
| CID5283637  | LMNA    | predicted |
| CID5283637  | GPBAR1  | predicted |
| CID5283637  | TSHR    | predicted |
| CID5283637  | MAPT    | predicted |
| CID5283637  | CYP3A4  | predicted |
| CID5283637  | RAB9A   | predicted |
| CID5283637  | SHBG    | predicted |
| CID5283637  | HSD11B1 | predicted |
| CID5283637  | SMN1    | predicted |
| CID5283637  | NPC1    | predicted |
| CID5283637  | CYP19A1 | predicted |
| CID5283637  | TDP1    | predicted |
| CID5283637  | SLCO1B3 | predicted |
| CID5283637  | SLCO1B1 | predicted |
| CID5283637  | TNF     | predicted |
| CID5283637  | TP53    | predicted |
| CID5283637  | MAPK1   | predicted |
| CID5283637  | KMT2A   | predicted |
| CID5283637  | ALDH1A1 | predicted |
| CID5281670  | ESR1    | predicted |
| CID5281670  | KDM4E   | predicted |
| CID5281670  | ALOX15  | predicted |
| CID5281670  | CYP2C19 | predicted |
| CID5281670  | CYP3A4  | predicted |
| CID5281670  | HPGD    | predicted |
| CID5281670  | PSIP1   | predicted |
| CID5281670  | KMT2A   | predicted |
| CID5281670  | BLM     | predicted |
| CID5281670  | ALDH1A1 | predicted |
| CID5281670  | L3MBTL1 | predicted |
| CID5281670  | LMNA    | predicted |
| CID5281670  | HIF1A   | predicted |
| CID5281670  | TSHR    | predicted |
| CID5281670  | SMN1    | predicted |

|            |          |           |
|------------|----------|-----------|
| CID5281670 | PKM      | predicted |
| CID5281670 | NPC1     | predicted |
| CID5281670 | CYP2D6   | predicted |
| CID5281670 | BCL2     | predicted |
| CID5281670 | RAB9A    | predicted |
| CID5281670 | SLC22A12 | Known     |
| CID5281670 | PIM1     | Known     |
| CID5281670 | APEX1    | Known     |
| CID5281670 | MCL1     | Known     |
| CID5281670 | ESR2     | Known     |
| CID5281670 | POLB     | Known     |
| CID5281670 | TP53     | Known     |
| CID5281670 | TDP1     | Known     |
| CID5281670 | GAA      | Known     |
| CID5281670 | GPR35    | Known     |
| CID5281670 | MAPT     | Known     |
| CID5281670 | HSD17B10 | Known     |
| CID5281670 | RECQL    | Known     |
| CID5281670 | NFKB1    | Known     |
| CID5281670 | THPO     | Known     |
| CID5281670 | CYP2C9   | Known     |
| CID932     | CYP1A1   | predicted |
| CID932     | CYP1A2   | predicted |
| CID932     | AR       | predicted |
| CID932     | CYP2C9   | predicted |
| CID932     | NR3C1    | predicted |
| CID932     | RECQL    | predicted |
| CID932     | GSTP1    | predicted |
| CID932     | HSD17B3  | predicted |
| CID932     | HSD17B2  | predicted |
| CID932     | HIF1A    | predicted |
| CID932     | HPGD     | predicted |
| CID932     | HSD17B10 | predicted |
| CID932     | ALDH1A1  | predicted |
| CID932     | ALOX5    | predicted |
| CID932     | MAPT     | predicted |
| CID932     | ABCG2    | predicted |
| CID932     | APEX1    | predicted |
| CID932     | XDH      | predicted |
| CID932     | CYP2D6   | predicted |
| CID932     | KDM4E    | predicted |
| CID932     | OPRK1    | Known     |
| CID932     | OPRD1    | Known     |
| CID932     | ABCC1    | Known     |
| CID932     | OPRM1    | Known     |
| CID932     | CBR1     | Known     |
| CID932     | CYP19A1  | Known     |
| CID932     | CYP1B1   | Known     |
| CID932     | SHBG     | Known     |
| CID932     | HSD17B1  | Known     |
| CID932     | TDP1     | Known     |
| CID932     | CYP2C19  | Known     |
| CID932     | CYP3A4   | Known     |
| CID5997    | LMNA     | predicted |
| CID5997    | PTPN1    | predicted |
| CID5997    | GPBAR1   | predicted |
| CID5997    | TSHR     | predicted |
| CID5997    | MAPT     | predicted |

|             |         |           |
|-------------|---------|-----------|
| CID5997     | CYP3A4  | predicted |
| CID5997     | VDR     | predicted |
| CID5997     | RAB9A   | predicted |
| CID5997     | SHBG    | predicted |
| CID5997     | HSD11B1 | predicted |
| CID5997     | SMN1    | predicted |
| CID5997     | NPC1    | predicted |
| CID5997     | ALOX15  | predicted |
| CID5997     | CYP19A1 | predicted |
| CID5997     | TDP1    | predicted |
| CID5997     | SLCO1B3 | predicted |
| CID5997     | SLCO1B1 | predicted |
| CID5997     | TNF     | predicted |
| CID5997     | TP53    | predicted |
| CID5997     | MAPK1   | predicted |
| CID22375086 | LMNA    | predicted |
| CID22375086 | MAPT    | predicted |
| CID22375086 | PTPN1   | predicted |
| CID22375086 | CYP3A4  | predicted |
| CID22375086 | TSHR    | predicted |
| CID22375086 | RAB9A   | predicted |
| CID22375086 | TDP1    | predicted |
| CID22375086 | SMN1    | predicted |
| CID22375086 | NPC1    | predicted |
| CID22375086 | CYP19A1 | predicted |
| CID22375086 | KMT2A   | predicted |
| CID22375086 | AKR1B10 | predicted |
| CID22375086 | ALDH1A1 | predicted |
| CID22375086 | ALOX15  | predicted |
| CID22375086 | TP53    | predicted |
| CID22375086 | GPBAR1  | predicted |
| CID22375086 | AKR1B1  | predicted |
| CID22375086 | CA9     | predicted |
| CID22375086 | ACHE    | predicted |
| CID22375086 | NPSR1   | predicted |
| CID53399153 | CNR1    | predicted |
| CID53399153 | LMNA    | predicted |
| CID53399153 | CNR2    | predicted |
| CID53399153 | TRPV1   | predicted |
| CID53399153 | TSHR    | predicted |
| CID53399153 | PTPN1   | predicted |
| CID53399153 | GPBAR1  | predicted |
| CID53399153 | CYP3A4  | predicted |
| CID53399153 | MAPT    | predicted |
| CID53399153 | FAAH    | predicted |
| CID53399153 | RAB9A   | predicted |
| CID53399153 | ALDH1A1 | predicted |
| CID53399153 | CYP2C19 | predicted |
| CID53399153 | NPC1    | predicted |
| CID53399153 | SMN1    | predicted |
| CID53399153 | MAPK1   | predicted |
| CID53399153 | CYP2D6  | predicted |
| CID53399153 | NFKB1   | predicted |
| CID53399153 | MAP2K1  | predicted |
| CID53399153 | SHBG    | predicted |
| CID234817   | CYP3A4  | predicted |
| CID234817   | MAPT    | predicted |
| CID234817   | CYP19A1 | predicted |

|             |         |           |
|-------------|---------|-----------|
| CID234817   | LMNA    | predicted |
| CID234817   | SLCO2B1 | predicted |
| CID234817   | TDP1    | predicted |
| CID234817   | TSHR    | predicted |
| CID234817   | PTPN1   | predicted |
| CID234817   | ABCG2   | predicted |
| CID234817   | SMN1    | predicted |
| CID234817   | BACE1   | predicted |
| CID234817   | POLB    | predicted |
| CID234817   | APEX1   | predicted |
| CID234817   | RAB9A   | predicted |
| CID234817   | NPSR1   | predicted |
| CID234817   | MAPK1   | predicted |
| CID234817   | ACHE    | predicted |
| CID234817   | CYP2C9  | predicted |
| CID234817   | NPC1    | predicted |
| CID234817   | ALOX15  | predicted |
| CID59271037 | MAPT    | predicted |
| CID59271037 | LMNA    | predicted |
| CID59271037 | PTPN1   | predicted |
| CID59271037 | CYP3A4  | predicted |
| CID59271037 | TSHR    | predicted |
| CID59271037 | RAB9A   | predicted |
| CID59271037 | TDP1    | predicted |
| CID59271037 | SMN1    | predicted |
| CID59271037 | NPC1    | predicted |
| CID59271037 | CYP19A1 | predicted |
| CID59271037 | KMT2A   | predicted |
| CID59271037 | AKR1B10 | predicted |
| CID59271037 | ALDH1A1 | predicted |
| CID59271037 | TP53    | predicted |
| CID59271037 | GPBAR1  | predicted |
| CID59271037 | AKR1B1  | predicted |
| CID59271037 | ALOX15  | predicted |
| CID59271037 | CA9     | predicted |
| CID59271037 | ACHE    | predicted |
| CID59271037 | ABCG2   | predicted |
| CID1203     | OPRL1   | predicted |
| CID1203     | MMP12   | predicted |
| CID1203     | KDM4E   | predicted |
| CID1203     | CYP19A1 | predicted |
| CID1203     | PGD     | predicted |
| CID1203     | CBR1    | predicted |
| CID1203     | SLC6A4  | predicted |
| CID1203     | HSD17B1 | predicted |
| CID1203     | HPGD    | predicted |
| CID1203     | PGF     | predicted |
| CID1203     | VEGFA   | predicted |
| CID1203     | VCP     | predicted |
| CID1203     | POLB    | predicted |
| CID1203     | ABCC1   | predicted |
| CID1203     | DHFR    | predicted |
| CID1203     | GABRA2  | predicted |
| CID1203     | F2      | predicted |
| CID1203     | SLC6A2  | predicted |
| CID1203     | MAPK14  | predicted |
| CID1203     | GABRA1  | predicted |
| CID1203     | OPRK1   | Known     |



|             |          |           |
|-------------|----------|-----------|
| CID1203     | OPRD1    | Known     |
| CID1203     | OPRM1    | Known     |
| CID12895771 | LMNA     | predicted |
| CID12895771 | PTPN1    | predicted |
| CID12895771 | TSHR     | predicted |
| CID12895771 | MAPT     | predicted |
| CID12895771 | RAB9A    | predicted |
| CID12895771 | IL2      | predicted |
| CID12895771 | CYP3A4   | predicted |
| CID12895771 | NPC1     | predicted |
| CID12895771 | TDP1     | predicted |
| CID12895771 | GPBAR1   | predicted |
| CID12895771 | SMN1     | predicted |
| CID12895771 | TNF      | predicted |
| CID12895771 | HSP90AA1 | predicted |
| CID12895771 | AKR1B1   | predicted |
| CID12895771 | L3MBTL1  | predicted |
| CID12895771 | CYP19A1  | predicted |
| CID12895771 | HSD11B1  | predicted |
| CID12895771 | POLB     | predicted |
| CID12895771 | TP53     | predicted |
| CID12895771 | ALDH1A1  | predicted |
| CID312822   | PTPN1    | predicted |
| CID312822   | LMNA     | predicted |
| CID312822   | GPBAR1   | predicted |
| CID312822   | TSHR     | predicted |
| CID312822   | MAPT     | predicted |
| CID312822   | CYP3A4   | predicted |
| CID312822   | RAB9A    | predicted |
| CID312822   | SHBG     | predicted |
| CID312822   | HSD11B1  | predicted |
| CID312822   | SMN1     | predicted |
| CID312822   | NPC1     | predicted |
| CID312822   | CYP19A1  | predicted |
| CID312822   | TDP1     | predicted |
| CID312822   | SLCO1B3  | predicted |
| CID312822   | SLCO1B1  | predicted |
| CID312822   | TNF      | predicted |
| CID312822   | TP53     | predicted |
| CID312822   | MAPK1    | predicted |
| CID312822   | KMT2A    | predicted |
| CID312822   | ALDH1A1  | predicted |
| CID5991122  | PTPN1    | predicted |
| CID5991122  | LMNA     | predicted |
| CID5991122  | CYP3A4   | predicted |
| CID5991122  | MAPT     | predicted |
| CID5991122  | SMN1     | predicted |
| CID5991122  | TSHR     | predicted |
| CID5991122  | GPBAR1   | predicted |
| CID5991122  | RAB9A    | predicted |
| CID5991122  | TNF      | predicted |
| CID5991122  | HSD11B1  | predicted |
| CID5991122  | AKR1B10  | predicted |
| CID5991122  | TDP1     | predicted |
| CID5991122  | CYP19A1  | predicted |
| CID5991122  | NPC1     | predicted |
| CID5991122  | TP53     | predicted |
| CID5991122  | NPSR1    | predicted |

|             |          |           |
|-------------|----------|-----------|
| CID5991122  | KMT2A    | predicted |
| CID5991122  | ALDH1A1  | predicted |
| CID5991122  | HTT      | predicted |
| CID5991122  | ESR1     | predicted |
| CID12305144 | DRD1     | predicted |
| CID12305144 | F3       | predicted |
| CID12305144 | DRD2     | predicted |
| CID12305144 | CYP3A4   | predicted |
| CID12305144 | CYP2D6   | predicted |
| CID12305144 | LMNA     | predicted |
| CID12305144 | MAPT     | predicted |
| CID12305144 | HTR1A    | predicted |
| CID12305144 | ACHE     | predicted |
| CID12305144 | CYP2C19  | predicted |
| CID12305144 | ALDH1A1  | predicted |
| CID12305144 | TDP1     | predicted |
| CID12305144 | TSHR     | predicted |
| CID12305144 | MAOA     | predicted |
| CID12305144 | CHRNA2   | predicted |
| CID12305144 | CHRFAM7A | predicted |
| CID12305144 | MAPK1    | predicted |
| CID12305144 | HTR7     | predicted |
| CID12305144 | TAAR1    | predicted |
| CID12305144 | NPC1     | predicted |
| CID235284   | PTPN1    | predicted |
| CID235284   | LMNA     | predicted |
| CID235284   | MAPT     | predicted |
| CID235284   | SMN1     | predicted |
| CID235284   | CYP3A4   | predicted |
| CID235284   | GPBAR1   | predicted |
| CID235284   | TSHR     | predicted |
| CID235284   | TNF      | predicted |
| CID235284   | RAB9A    | predicted |
| CID235284   | HSD11B1  | predicted |
| CID235284   | AKR1B10  | predicted |
| CID235284   | CYP19A1  | predicted |
| CID235284   | NPC1     | predicted |
| CID235284   | SLCO1B3  | predicted |
| CID235284   | TOP1     | predicted |
| CID235284   | TDP1     | predicted |
| CID235284   | ESR1     | predicted |
| CID235284   | SLCO1B1  | predicted |
| CID235284   | SHBG     | predicted |
| CID235284   | NPSR1    | predicted |
| CID500031   | PTPN1    | predicted |
| CID500031   | LMNA     | predicted |
| CID500031   | MAPT     | predicted |
| CID500031   | CYP3A4   | predicted |
| CID500031   | SMN1     | predicted |
| CID500031   | GPBAR1   | predicted |
| CID500031   | RAB9A    | predicted |
| CID500031   | TSHR     | predicted |
| CID500031   | AKR1B10  | predicted |
| CID500031   | TNF      | predicted |
| CID500031   | HSD11B1  | predicted |
| CID500031   | CYP19A1  | predicted |
| CID500031   | NPC1     | predicted |
| CID500031   | TDP1     | predicted |

|             |         |           |
|-------------|---------|-----------|
| CID500031   | NFKB1   | predicted |
| CID500031   | KMT2A   | predicted |
| CID500031   | HTT     | predicted |
| CID500031   | NPSR1   | predicted |
| CID500031   | ALDH1A1 | predicted |
| CID500031   | SLCO1B3 | predicted |
| CID14038848 | PTPN1   | predicted |
| CID14038848 | LMNA    | predicted |
| CID14038848 | NR1H3   | predicted |
| CID14038848 | MAPT    | predicted |
| CID14038848 | PRKCD   | predicted |
| CID14038848 | CYP3A4  | predicted |
| CID14038848 | GPBAR1  | predicted |
| CID14038848 | TSHR    | predicted |
| CID14038848 | RAB9A   | predicted |
| CID14038848 | NPC1    | predicted |
| CID14038848 | HSD11B1 | predicted |
| CID14038848 | ACHE    | predicted |
| CID14038848 | SMN1    | predicted |
| CID14038848 | ESR1    | predicted |
| CID14038848 | CYP19A1 | predicted |
| CID14038848 | SHBG    | predicted |
| CID14038848 | XBP1    | predicted |
| CID14038848 | KMT2A   | predicted |
| CID14038848 | ALDH1A1 | predicted |
| CID14038848 | PRKCA   | predicted |
| CID5320710  | LMNA    | predicted |
| CID5320710  | PTPN1   | predicted |
| CID5320710  | MAPT    | predicted |
| CID5320710  | CYP3A4  | predicted |
| CID5320710  | TSHR    | predicted |
| CID5320710  | RAB9A   | predicted |
| CID5320710  | GPBAR1  | predicted |
| CID5320710  | ALOX5   | predicted |
| CID5320710  | SMN1    | predicted |
| CID5320710  | CYP19A1 | predicted |
| CID5320710  | NPC1    | predicted |
| CID5320710  | MPEG1   | predicted |
| CID5320710  | HSD11B1 | predicted |
| CID5320710  | KMT2A   | predicted |
| CID5320710  | ALDH1A1 | predicted |
| CID5320710  | TDP1    | predicted |
| CID5320710  | ACHE    | predicted |
| CID5320710  | SHBG    | predicted |
| CID5320710  | MAPK1   | predicted |
| CID5320710  | PPARG   | predicted |
| CID10248    | CYP3A4  | predicted |
| CID10248    | MAPT    | predicted |
| CID10248    | ABCB1   | predicted |
| CID10248    | ALDH1A1 | predicted |
| CID10248    | ABCG2   | predicted |
| CID10248    | TSHR    | predicted |
| CID10248    | ACHE    | predicted |
| CID10248    | ODC1    | predicted |
| CID10248    | TP53    | predicted |
| CID10248    | TDP1    | predicted |
| CID10248    | TRPA1   | predicted |
| CID10248    | LMNA    | predicted |

|            |          |           |
|------------|----------|-----------|
| CID10248   | KMT2A    | predicted |
| CID10248   | BACE1    | predicted |
| CID10248   | NPC1     | predicted |
| CID10248   | KDM4E    | predicted |
| CID10248   | RAB9A    | predicted |
| CID10248   | CA9      | predicted |
| CID10248   | CNR2     | predicted |
| CID10248   | ALOX15   | predicted |
| CID637517  | HMGCR    | predicted |
| CID637517  | TSHR     | predicted |
| CID637517  | LMNA     | predicted |
| CID637517  | PPARG    | predicted |
| CID637517  | PPARA    | predicted |
| CID637517  | PPARD    | predicted |
| CID637517  | OXER1    | predicted |
| CID637517  | MPEG1    | predicted |
| CID637517  | FAAH     | predicted |
| CID637517  | FABP3    | predicted |
| CID637517  | ALOX5    | predicted |
| CID637517  | TRPV1    | predicted |
| CID637517  | MAPT     | predicted |
| CID637517  | PTPN1    | predicted |
| CID637517  | CYP3A4   | predicted |
| CID637517  | PTGIR    | predicted |
| CID637517  | CNR2     | predicted |
| CID637517  | CNR1     | predicted |
| CID637517  | FNTA     | predicted |
| CID637517  | TDP1     | predicted |
| CID5282457 | HMGCR    | predicted |
| CID5282457 | TSHR     | predicted |
| CID5282457 | PPARG    | predicted |
| CID5282457 | LMNA     | predicted |
| CID5282457 | OXER1    | predicted |
| CID5282457 | PPARD    | predicted |
| CID5282457 | PPARA    | predicted |
| CID5282457 | FAAH     | predicted |
| CID5282457 | MPEG1    | predicted |
| CID5282457 | FABP3    | predicted |
| CID5282457 | MAPT     | predicted |
| CID5282457 | PTPN1    | predicted |
| CID5282457 | TRPV1    | predicted |
| CID5282457 | CYP3A4   | predicted |
| CID5282457 | ALOX5    | predicted |
| CID5282457 | PTGIR    | predicted |
| CID5282457 | CNR1     | predicted |
| CID5282457 | CNR2     | predicted |
| CID5282457 | ALDH1A1  | predicted |
| CID5282457 | TDP1     | predicted |
| CID637542  | CA13     | predicted |
| CID637542  | ESR1     | predicted |
| CID637542  | HSD17B10 | predicted |
| CID637542  | GLA      | predicted |
| CID637542  | AKR1B10  | predicted |
| CID637542  | CASP2    | predicted |
| CID637542  | LMNA     | predicted |
| CID637542  | TDP1     | predicted |
| CID637542  | MAPT     | predicted |
| CID637542  | SERPINE1 | predicted |

|            |          |           |
|------------|----------|-----------|
| CID637542  | MB       | predicted |
| CID637542  | CYP3A4   | predicted |
| CID637542  | HCAR2    | predicted |
| CID637542  | THPO     | predicted |
| CID637542  | GAA      | predicted |
| CID637542  | HPGD     | predicted |
| CID637542  | F2       | predicted |
| CID637542  | TSHR     | predicted |
| CID637542  | KDM4E    | predicted |
| CID637542  | NFKB1    | predicted |
| CID637542  | CA12     | Known     |
| CID637542  | CA1      | Known     |
| CID637542  | CA2      | Known     |
| CID637542  | CA9      | Known     |
| CID637542  | CA7      | Known     |
| CID637542  | CA14     | Known     |
| CID637542  | CA6      | Known     |
| CID637542  | CA4      | Known     |
| CID637542  | CA5A     | Known     |
| CID637542  | CA5B     | Known     |
| CID637542  | CA3      | Known     |
| CID637542  | ESR2     | Known     |
| CID637542  | AKR1B1   | Known     |
| CID72      | CA5A     | predicted |
| CID72      | CA13     | predicted |
| CID72      | CA3      | predicted |
| CID72      | CA5B     | predicted |
| CID72      | POLB     | predicted |
| CID72      | HSD17B10 | predicted |
| CID72      | GLA      | predicted |
| CID72      | ALDH1A1  | predicted |
| CID72      | TDP1     | predicted |
| CID72      | KDM4E    | predicted |
| CID72      | KMT2A    | predicted |
| CID72      | HPGD     | predicted |
| CID72      | CYP3A4   | predicted |
| CID72      | CASP2    | predicted |
| CID72      | LMNA     | predicted |
| CID72      | RECQL    | predicted |
| CID72      | THPO     | predicted |
| CID72      | TP53     | predicted |
| CID72      | SERPINE1 | predicted |
| CID72      | APEX1    | predicted |
| CID72      | CA1      | Known     |
| CID72      | CA9      | Known     |
| CID72      | CA12     | Known     |
| CID72      | CA7      | Known     |
| CID72      | CA2      | Known     |
| CID72      | CA14     | Known     |
| CID72      | CA6      | Known     |
| CID72      | CA4      | Known     |
| CID72      | GAA      | Known     |
| CID72      | MAPT     | Known     |
| CID5280442 | ALDH2    | predicted |
| CID5280442 | CALM1    | predicted |
| CID5280442 | TP53     | predicted |
| CID5280442 | CYP2D6   | predicted |
| CID5280442 | XDH      | predicted |

|             |          |           |
|-------------|----------|-----------|
| CID5280442  | ABCG2    | predicted |
| CID5280442  | LMNA     | predicted |
| CID5280442  | HPGD     | predicted |
| CID5280442  | HSD17B10 | predicted |
| CID5280442  | KMT2A    | predicted |
| CID5280442  | ABCB1    | predicted |
| CID5280442  | CYP19A1  | predicted |
| CID5280442  | HSD17B1  | predicted |
| CID5280442  | ALOX15   | predicted |
| CID5280442  | ABCC1    | predicted |
| CID5280442  | NOX4     | predicted |
| CID5280442  | SMN1     | predicted |
| CID5280442  | KDM4E    | predicted |
| CID5280442  | PLG      | predicted |
| CID5280442  | TSHR     | predicted |
| CID5280442  | CYP1A2   | Known     |
| CID5280442  | CYP1A1   | Known     |
| CID5280442  | CYP1B1   | Known     |
| CID5280442  | NR3C1    | Known     |
| CID5280442  | AR       | Known     |
| CID5280442  | MAPK10   | Known     |
| CID5280442  | RAB9A    | Known     |
| CID5280442  | NPC1     | Known     |
| CID5280442  | CYP2C19  | Known     |
| CID5280442  | CYP3A4   | Known     |
| CID5280442  | CYP2C9   | Known     |
| CID5280442  | ALDH1A1  | Known     |
| CID5280442  | MAPT     | Known     |
| CID5280442  | HIF1A    | Known     |
| CID8892     | HMGCR    | predicted |
| CID8892     | TSHR     | predicted |
| CID8892     | LMNA     | predicted |
| CID8892     | PPARG    | predicted |
| CID8892     | PPARD    | predicted |
| CID8892     | PPARA    | predicted |
| CID8892     | OXER1    | predicted |
| CID8892     | MAPT     | predicted |
| CID8892     | PTPN1    | predicted |
| CID8892     | CES1     | predicted |
| CID8892     | FAAH     | predicted |
| CID8892     | FABP3    | predicted |
| CID8892     | TRPV1    | predicted |
| CID8892     | CYP3A4   | predicted |
| CID8892     | MPEG1    | predicted |
| CID8892     | TDP1     | predicted |
| CID8892     | CES2     | predicted |
| CID8892     | ALDH1A1  | predicted |
| CID8892     | SMN1     | predicted |
| CID8892     | NFKB1    | predicted |
| CID20144841 | TYR      | predicted |
| CID20144841 | SRD5A2   | predicted |
| CID20144841 | LMNA     | predicted |
| CID20144841 | TP53     | predicted |
| CID20144841 | MAPT     | predicted |
| CID20144841 | LTA4H    | predicted |
| CID20144841 | TBXAS1   | predicted |
| CID20144841 | NFKB1    | predicted |
| CID20144841 | THPO     | predicted |

|             |          |           |
|-------------|----------|-----------|
| CID20144841 | TDP1     | predicted |
| CID20144841 | CYP2C19  | predicted |
| CID20144841 | CYP3A4   | predicted |
| CID20144841 | HPGD     | predicted |
| CID20144841 | HSD17B10 | predicted |
| CID20144841 | ALOX15   | predicted |
| CID20144841 | MAPK1    | predicted |
| CID20144841 | ALDH1A1  | predicted |
| CID20144841 | HIF1A    | predicted |
| CID20144841 | CYP2D6   | predicted |
| CID20144841 | NPSR1    | predicted |
| CID20144841 | DAO      | Known     |
| CID20144841 | TSHR     | Known     |
| CID1549111  | LMNA     | predicted |
| CID1549111  | ALOX15   | predicted |
| CID1549111  | TP53     | predicted |
| CID1549111  | ALDH1A1  | predicted |
| CID1549111  | HPGD     | predicted |
| CID1549111  | NFKB1    | predicted |
| CID1549111  | THPO     | predicted |
| CID1549111  | CYP2C19  | predicted |
| CID1549111  | TDP1     | predicted |
| CID1549111  | KDM4E    | predicted |
| CID1549111  | CYP3A4   | predicted |
| CID1549111  | CYP2D6   | predicted |
| CID1549111  | MAPT     | predicted |
| CID1549111  | CYP2C9   | predicted |
| CID1549111  | PKM      | predicted |
| CID1549111  | ADORA2B  | predicted |
| CID1549111  | SMN1     | predicted |
| CID1549111  | HTT      | predicted |
| CID1549111  | BLM      | predicted |
| CID1549111  | CA3      | predicted |
| CID1549111  | TSHR     | Known     |
| CID1549111  | HSD17B10 | Known     |
| CID1549111  | HIF1A    | Known     |
| CID12409    | TSHR     | predicted |
| CID12409    | MPEG1    | predicted |
| CID12409    | HMGCR    | predicted |
| CID12409    | FAAH     | predicted |
| CID12409    | ALOX5    | predicted |
| CID12409    | TRPV1    | predicted |
| CID12409    | LMNA     | predicted |
| CID12409    | CNR2     | predicted |
| CID12409    | CNR1     | predicted |
| CID12409    | FABP3    | predicted |
| CID12409    | FNTA     | predicted |
| CID12409    | PPARG    | predicted |
| CID12409    | PPARA    | predicted |
| CID12409    | CCR5     | predicted |
| CID12409    | PPARD    | predicted |
| CID12409    | MAPT     | predicted |
| CID12409    | SAE1     | predicted |
| CID12409    | SHBG     | predicted |
| CID12409    | ACHE     | predicted |
| CID12409    | PTPN1    | predicted |
| CID5283349  | TSHR     | predicted |
| CID5283349  | LMNA     | predicted |

|             |         |           |
|-------------|---------|-----------|
| CID5283349  | CNR2    | predicted |
| CID5283349  | ALDH1A1 | predicted |
| CID5283349  | TRPV1   | predicted |
| CID5283349  | FAAH    | predicted |
| CID5283349  | MAPT    | predicted |
| CID5283349  | CNR1    | predicted |
| CID5283349  | CYP3A4  | predicted |
| CID5283349  | PPARG   | predicted |
| CID5283349  | MPEG1   | predicted |
| CID5283349  | HMGCR   | predicted |
| CID5283349  | ALOX5   | predicted |
| CID5283349  | RAB9A   | predicted |
| CID5283349  | TRPA1   | predicted |
| CID5283349  | PTPN1   | predicted |
| CID5283349  | TDP1    | predicted |
| CID5283349  | TP53    | predicted |
| CID5283349  | PPARA   | predicted |
| CID5283349  | NPC1    | predicted |
| CID5462193  | MAPT    | predicted |
| CID5462193  | CYP3A4  | predicted |
| CID5462193  | ABCG2   | predicted |
| CID5462193  | RAB9A   | predicted |
| CID5462193  | NPC1    | predicted |
| CID5462193  | LMNA    | predicted |
| CID5462193  | CYP19A1 | predicted |
| CID5462193  | POLB    | predicted |
| CID5462193  | AKR1B1  | predicted |
| CID5462193  | TDP1    | predicted |
| CID5462193  | APEX1   | predicted |
| CID5462193  | IL2     | predicted |
| CID5462193  | SMN1    | predicted |
| CID5462193  | KMT2A   | predicted |
| CID5462193  | MAPK1   | predicted |
| CID5462193  | L3MBTL1 | predicted |
| CID5462193  | BACE1   | predicted |
| CID5462193  | ALDH1A1 | predicted |
| CID5462193  | KDM4E   | predicted |
| CID5462193  | PTPN1   | predicted |
| CID52914864 | TSHR    | predicted |
| CID52914864 | LMNA    | predicted |
| CID52914864 | MAPT    | predicted |
| CID52914864 | CYP3A4  | predicted |
| CID52914864 | ALDH1A1 | predicted |
| CID52914864 | PPARG   | predicted |
| CID52914864 | HMGCR   | predicted |
| CID52914864 | PTPN1   | predicted |
| CID52914864 | TDP1    | predicted |
| CID52914864 | OXER1   | predicted |
| CID52914864 | SMN1    | predicted |
| CID52914864 | CYP19A1 | predicted |
| CID52914864 | TP53    | predicted |
| CID52914864 | KMT2A   | predicted |
| CID52914864 | ALOX15  | predicted |
| CID52914864 | NFKB1   | predicted |
| CID52914864 | CNR2    | predicted |
| CID52914864 | RAB9A   | predicted |
| CID52914864 | PPARA   | predicted |
| CID52914864 | MAPK1   | predicted |



|             |          |           |
|-------------|----------|-----------|
| CID5282822  | HMGCR    | predicted |
| CID5282822  | TSHR     | predicted |
| CID5282822  | LMNA     | predicted |
| CID5282822  | PPARG    | predicted |
| CID5282822  | OXER1    | predicted |
| CID5282822  | PPARA    | predicted |
| CID5282822  | PPARD    | predicted |
| CID5282822  | MAPT     | predicted |
| CID5282822  | PTPN1    | predicted |
| CID5282822  | FABP3    | predicted |
| CID5282822  | FAAH     | predicted |
| CID5282822  | CYP3A4   | predicted |
| CID5282822  | PTGIR    | predicted |
| CID5282822  | MPEG1    | predicted |
| CID5282822  | TDP1     | predicted |
| CID5282822  | NFKB1    | predicted |
| CID5282822  | ALDH1A1  | predicted |
| CID5282822  | ALOX5    | predicted |
| CID5282822  | SMN1     | predicted |
| CID5282822  | TRPV1    | predicted |
| CID7121     | CA6      | predicted |
| CID7121     | CA13     | predicted |
| CID7121     | CA5A     | predicted |
| CID7121     | CA3      | predicted |
| CID7121     | CA5B     | predicted |
| CID7121     | GLA      | predicted |
| CID7121     | HSD17B10 | predicted |
| CID7121     | CASP2    | predicted |
| CID7121     | HSD17B3  | predicted |
| CID7121     | ESR2     | predicted |
| CID7121     | SERPINE1 | predicted |
| CID7121     | LMNA     | predicted |
| CID7121     | MB       | predicted |
| CID7121     | MAPT     | predicted |
| CID7121     | GAA      | predicted |
| CID7121     | TDP1     | predicted |
| CID7121     | CYP3A4   | predicted |
| CID7121     | THPO     | predicted |
| CID7121     | HPGD     | predicted |
| CID7121     | ABCB1    | predicted |
| CID7121     | CA9      | Known     |
| CID7121     | CA12     | Known     |
| CID7121     | CA1      | Known     |
| CID7121     | CA7      | Known     |
| CID7121     | CA2      | Known     |
| CID7121     | CA14     | Known     |
| CID7121     | CA4      | Known     |
| CID12313579 | DRD1     | predicted |
| CID12313579 | DRD2     | predicted |
| CID12313579 | CYP3A4   | predicted |
| CID12313579 | MAPT     | predicted |
| CID12313579 | F3       | predicted |
| CID12313579 | LMNA     | predicted |
| CID12313579 | CYP2D6   | predicted |
| CID12313579 | ALDH1A1  | predicted |
| CID12313579 | CYP2C19  | predicted |
| CID12313579 | ACHE     | predicted |
| CID12313579 | TSHR     | predicted |

|             |          |           |
|-------------|----------|-----------|
| CID12313579 | TDP1     | predicted |
| CID12313579 | NPC1     | predicted |
| CID12313579 | RAB9A    | predicted |
| CID12313579 | MAOA     | predicted |
| CID12313579 | TAAR1    | predicted |
| CID12313579 | MAPK1    | predicted |
| CID12313579 | SMN1     | predicted |
| CID12313579 | ABCG2    | predicted |
| CID12313579 | HTR1A    | predicted |
| CID12313579 | PTPRCAP  | Known     |
| CID518516   | PTPN1    | predicted |
| CID518516   | LMNA     | predicted |
| CID518516   | TSHR     | predicted |
| CID518516   | MAPT     | predicted |
| CID518516   | CYP3A4   | predicted |
| CID518516   | GPBAR1   | predicted |
| CID518516   | SMN1     | predicted |
| CID518516   | HSD11B1  | predicted |
| CID518516   | CYP19A1  | predicted |
| CID518516   | RAB9A    | predicted |
| CID518516   | ACHE     | predicted |
| CID518516   | CNR2     | predicted |
| CID518516   | NPC1     | predicted |
| CID518516   | CNR1     | predicted |
| CID518516   | KMT2A    | predicted |
| CID518516   | MAPK1    | predicted |
| CID518516   | SHBG     | predicted |
| CID518516   | TDP1     | predicted |
| CID518516   | ALDH1A1  | predicted |
| CID518516   | TP53     | predicted |
| CID2234     | LMNA     | predicted |
| CID2234     | HTR2C    | predicted |
| CID2234     | TSHR     | predicted |
| CID2234     | MAOA     | predicted |
| CID2234     | HTR2B    | predicted |
| CID2234     | GDA      | predicted |
| CID2234     | PARP1    | predicted |
| CID2234     | BLM      | predicted |
| CID2234     | MAPT     | predicted |
| CID2234     | TAAR1    | predicted |
| CID2234     | CYP3A4   | predicted |
| CID2234     | CYP2C19  | predicted |
| CID2234     | ALDH1A1  | predicted |
| CID2234     | KMT2A    | predicted |
| CID2234     | CA5B     | predicted |
| CID2234     | CA5A     | predicted |
| CID2234     | MAPK1    | predicted |
| CID2234     | CAPN1    | predicted |
| CID2234     | SMN1     | predicted |
| CID2234     | MAP2K1   | predicted |
| CID57383916 | RECQL    | predicted |
| CID57383916 | APEX1    | predicted |
| CID57383916 | HPGD     | predicted |
| CID57383916 | ALDH1A1  | predicted |
| CID57383916 | HSD17B10 | predicted |
| CID57383916 | L3MBTL1  | predicted |
| CID57383916 | KDM4E    | predicted |
| CID57383916 | ALOX15   | predicted |

|             |         |           |
|-------------|---------|-----------|
| CID57383916 | MAPT    | predicted |
| CID57383916 | TSHR    | predicted |
| CID57383916 | BLM     | predicted |
| CID57383916 | POLB    | predicted |
| CID57383916 | LMNA    | predicted |
| CID57383916 | BRCA1   | predicted |
| CID57383916 | ABCC1   | predicted |
| CID57383916 | TP53    | predicted |
| CID57383916 | HIF1A   | predicted |
| CID57383916 | MCL1    | predicted |
| CID57383916 | USP2    | predicted |
| CID57383916 | AHR     | predicted |
| CID57383916 | TDP1    | Known     |
| CID72343    | CYP3A4  | predicted |
| CID72343    | DRD1    | predicted |
| CID72343    | MAPT    | predicted |
| CID72343    | F3      | predicted |
| CID72343    | DRD2    | predicted |
| CID72343    | ABCG2   | predicted |
| CID72343    | CYP2D6  | predicted |
| CID72343    | LMNA    | predicted |
| CID72343    | ACHE    | predicted |
| CID72343    | TDP1    | predicted |
| CID72343    | ALDH1A1 | predicted |
| CID72343    | USP2    | predicted |
| CID72343    | KMT2A   | predicted |
| CID72343    | NPC1    | predicted |
| CID72343    | RAB9A   | predicted |
| CID72343    | CYP2C19 | predicted |
| CID72343    | TAAR1   | predicted |
| CID72343    | MAPK1   | predicted |
| CID72343    | MAOA    | predicted |
| CID72343    | SMN1    | predicted |
| CID755      | LMNA    | predicted |
| CID755      | CNR1    | predicted |
| CID755      | PTPN1   | predicted |
| CID755      | GPBAR1  | predicted |
| CID755      | TSHR    | predicted |
| CID755      | CYP3A4  | predicted |
| CID755      | MAPT    | predicted |
| CID755      | RAB9A   | predicted |
| CID755      | CNR2    | predicted |
| CID755      | TRPV1   | predicted |
| CID755      | NPC1    | predicted |
| CID755      | SMN1    | predicted |
| CID755      | GSTK1   | predicted |
| CID755      | ALDH1A1 | predicted |
| CID755      | TDP1    | predicted |
| CID755      | CYP2C19 | predicted |
| CID755      | KMT2A   | predicted |
| CID755      | MAPK1   | predicted |
| CID755      | CYP2D6  | predicted |
| CID755      | SHBG    | predicted |
| CID6736     | ADRA1B  | predicted |
| CID6736     | HTR2C   | predicted |
| CID6736     | MAOA    | predicted |
| CID6736     | ADRA1A  | predicted |
| CID6736     | HTR2B   | predicted |

|            |         |           |
|------------|---------|-----------|
| CID6736    | ATM     | predicted |
| CID6736    | HTR2A   | predicted |
| CID6736    | CYP2A6  | predicted |
| CID6736    | CLK1    | predicted |
| CID6736    | CHUK    | predicted |
| CID6736    | KMT2A   | predicted |
| CID6736    | MAPT    | predicted |
| CID6736    | CYP2D6  | predicted |
| CID6736    | HTR6    | predicted |
| CID6736    | TSHR    | predicted |
| CID6736    | PDGFRA  | predicted |
| CID6736    | NISCH   | predicted |
| CID6736    | LMNA    | predicted |
| CID6736    | HTR1E   | predicted |
| CID6736    | HTR1A   | predicted |
| CID5318645 | MAPT    | predicted |
| CID5318645 | CYP3A4  | predicted |
| CID5318645 | ABCG2   | predicted |
| CID5318645 | RAB9A   | predicted |
| CID5318645 | TDP1    | predicted |
| CID5318645 | LMNA    | predicted |
| CID5318645 | NPC1    | predicted |
| CID5318645 | CYP19A1 | predicted |
| CID5318645 | AKR1B1  | predicted |
| CID5318645 | POLB    | predicted |
| CID5318645 | KDM4E   | predicted |
| CID5318645 | APEX1   | predicted |
| CID5318645 | SMN1    | predicted |
| CID5318645 | BACE1   | predicted |
| CID5318645 | IL2     | predicted |
| CID5318645 | KMT2A   | predicted |
| CID5318645 | MAPK1   | predicted |
| CID5318645 | GAA     | predicted |
| CID5318645 | ALDH1A1 | predicted |
| CID5318645 | PTPN1   | predicted |
| CID442474  | LMNA    | predicted |
| CID442474  | TSHR    | predicted |
| CID442474  | CYP3A4  | predicted |
| CID442474  | ALDH1A1 | predicted |
| CID442474  | MAPT    | predicted |
| CID442474  | PTPN1   | predicted |
| CID442474  | KMT2A   | predicted |
| CID442474  | SMN1    | predicted |
| CID442474  | TP53    | predicted |
| CID442474  | TDP1    | predicted |
| CID442474  | ALOX15  | predicted |
| CID442474  | RAB9A   | predicted |
| CID442474  | PPARG   | predicted |
| CID442474  | CA9     | predicted |
| CID442474  | NPC1    | predicted |
| CID442474  | ACHE    | predicted |
| CID442474  | MAPK1   | predicted |
| CID442474  | ALOX5   | predicted |
| CID442474  | CA1     | predicted |
| CID442474  | NPSR1   | predicted |
| CID5320250 | TSHR    | predicted |
| CID5320250 | ALDH1A1 | predicted |
| CID5320250 | TRPA1   | predicted |

|            |         |           |
|------------|---------|-----------|
| CID5320250 | TP53    | predicted |
| CID5320250 | CYP3A4  | predicted |
| CID5320250 | MAPT    | predicted |
| CID5320250 | LMNA    | predicted |
| CID5320250 | PTPN1   | predicted |
| CID5320250 | CNR2    | predicted |
| CID5320250 | ALOX5   | predicted |
| CID5320250 | ALOX15  | predicted |
| CID5320250 | CNR1    | predicted |
| CID5320250 | KMT2A   | predicted |
| CID5320250 | ACHE    | predicted |
| CID5320250 | ABCG2   | predicted |
| CID5320250 | CYP19A1 | predicted |
| CID5320250 | TDP1    | predicted |
| CID5320250 | SMN1    | predicted |
| CID5320250 | HPGD    | predicted |
| CID5320250 | PTGS1   | predicted |
| CID521245  | LMNA    | predicted |
| CID521245  | PTPN1   | predicted |
| CID521245  | MAPT    | predicted |
| CID521245  | CYP3A4  | predicted |
| CID521245  | TSHR    | predicted |
| CID521245  | RAB9A   | predicted |
| CID521245  | CYP19A1 | predicted |
| CID521245  | SMN1    | predicted |
| CID521245  | GPBAR1  | predicted |
| CID521245  | NPC1    | predicted |
| CID521245  | HSD11B1 | predicted |
| CID521245  | KMT2A   | predicted |
| CID521245  | ALDH1A1 | predicted |
| CID521245  | CNR2    | predicted |
| CID521245  | ACHE    | predicted |
| CID521245  | ALOX15  | predicted |
| CID521245  | TDP1    | predicted |
| CID521245  | CNR1    | predicted |
| CID521245  | MAPK1   | predicted |
| CID521245  | XBP1    | predicted |
| CID643820  | TSHR    | predicted |
| CID643820  | PTPN1   | predicted |
| CID643820  | LMNA    | predicted |
| CID643820  | ALDH1A1 | predicted |
| CID643820  | CYP3A4  | predicted |
| CID643820  | MAPT    | predicted |
| CID643820  | ALOX15  | predicted |
| CID643820  | KMT2A   | predicted |
| CID643820  | ACHE    | predicted |
| CID643820  | TDP1    | predicted |
| CID643820  | ALOX5   | predicted |
| CID643820  | PPARG   | predicted |
| CID643820  | ABCG2   | predicted |
| CID643820  | MAOB    | predicted |
| CID643820  | TP53    | predicted |
| CID643820  | SMN1    | predicted |
| CID643820  | MAPK1   | predicted |
| CID643820  | CYP19A1 | predicted |
| CID643820  | RAB9A   | predicted |
| CID643820  | BACE1   | predicted |
| CID3520    | HTR3A   | predicted |

|           |         |           |
|-----------|---------|-----------|
| CID3520   | HTR2C   | predicted |
| CID3520   | TAAR1   | predicted |
| CID3520   | MAOA    | predicted |
| CID3520   | GDA     | predicted |
| CID3520   | LMNA    | predicted |
| CID3520   | PARP1   | predicted |
| CID3520   | HTR2B   | predicted |
| CID3520   | TSHR    | predicted |
| CID3520   | PNP     | predicted |
| CID3520   | HPRT1   | predicted |
| CID3520   | DHFR    | predicted |
| CID3520   | ALDH1A1 | predicted |
| CID3520   | MIF     | predicted |
| CID3520   | ACHE    | predicted |
| CID3520   | CYP2C19 | predicted |
| CID3520   | CPB1    | predicted |
| CID3520   | BLM     | predicted |
| CID3520   | CA5B    | predicted |
| CID3520   | CA5A    | predicted |
| CID121719 | PTPN1   | predicted |
| CID121719 | TSHR    | predicted |
| CID121719 | LMNA    | predicted |
| CID121719 | MAPT    | predicted |
| CID121719 | CYP3A4  | predicted |
| CID121719 | GPBAR1  | predicted |
| CID121719 | CYP19A1 | predicted |
| CID121719 | TNF     | predicted |
| CID121719 | HSD11B1 | predicted |
| CID121719 | SMN1    | predicted |
| CID121719 | RAB9A   | predicted |
| CID121719 | ALDH1A1 | predicted |
| CID121719 | ALOX5   | predicted |
| CID121719 | SHBG    | predicted |
| CID121719 | NPC1    | predicted |
| CID121719 | KMT2A   | predicted |
| CID121719 | MAPK1   | predicted |
| CID121719 | TDP1    | predicted |
| CID121719 | CTSD    | predicted |
| CID121719 | TP53    | predicted |
| CID164648 | CYP3A4  | predicted |
| CID164648 | MAPT    | predicted |
| CID164648 | ABCG2   | predicted |
| CID164648 | LMNA    | predicted |
| CID164648 | RAB9A   | predicted |
| CID164648 | TDP1    | predicted |
| CID164648 | NPC1    | predicted |
| CID164648 | SMN1    | predicted |
| CID164648 | IL2     | predicted |
| CID164648 | AKR1B1  | predicted |
| CID164648 | TSHR    | predicted |
| CID164648 | POLB    | predicted |
| CID164648 | CYP19A1 | predicted |
| CID164648 | MAPK1   | predicted |
| CID164648 | KMT2A   | predicted |
| CID164648 | APEX1   | predicted |
| CID164648 | KDM4E   | predicted |
| CID164648 | ACHE    | predicted |
| CID164648 | ABCB1   | predicted |

|              |          |           |
|--------------|----------|-----------|
| CID164648    | ALDH1A1  | predicted |
| CID101306925 | LMNA     | predicted |
| CID101306925 | PTPN1    | predicted |
| CID101306925 | TNF      | predicted |
| CID101306925 | MAPT     | predicted |
| CID101306925 | CYP3A4   | predicted |
| CID101306925 | SMN1     | predicted |
| CID101306925 | RAB9A    | predicted |
| CID101306925 | GPBAR1   | predicted |
| CID101306925 | TSHR     | predicted |
| CID101306925 | NPC1     | predicted |
| CID101306925 | TDP1     | predicted |
| CID101306925 | HSP90AA1 | predicted |
| CID101306925 | HSD11B1  | predicted |
| CID101306925 | CYP19A1  | predicted |
| CID101306925 | ALDH1A1  | predicted |
| CID101306925 | AKR1B1   | predicted |
| CID101306925 | AKR1B10  | predicted |
| CID101306925 | SHBG     | predicted |
| CID101306925 | KMT2A    | predicted |
| CID101306925 | L3MBTL1  | predicted |
| CID21579640  | PTPN1    | predicted |
| CID21579640  | LMNA     | predicted |
| CID21579640  | TNF      | predicted |
| CID21579640  | MAPT     | predicted |
| CID21579640  | CYP3A4   | predicted |
| CID21579640  | RAB9A    | predicted |
| CID21579640  | GPBAR1   | predicted |
| CID21579640  | SMN1     | predicted |
| CID21579640  | NPC1     | predicted |
| CID21579640  | TSHR     | predicted |
| CID21579640  | TDP1     | predicted |
| CID21579640  | HSD11B1  | predicted |
| CID21579640  | CYP19A1  | predicted |
| CID21579640  | HSP90AA1 | predicted |
| CID21579640  | IL2      | predicted |
| CID21579640  | SHBG     | predicted |
| CID21579640  | ALOX5    | predicted |
| CID21579640  | AKR1B1   | predicted |
| CID21579640  | AKR1B10  | predicted |
| CID21579640  | KMT2A    | predicted |
| CID5316821   | CYP3A4   | predicted |
| CID5316821   | LMNA     | predicted |
| CID5316821   | MAPT     | predicted |
| CID5316821   | AKR1B1   | predicted |
| CID5316821   | TDP1     | predicted |
| CID5316821   | IL2      | predicted |
| CID5316821   | RAB9A    | predicted |
| CID5316821   | POLB     | predicted |
| CID5316821   | APEX1    | predicted |
| CID5316821   | NPC1     | predicted |
| CID5316821   | TSHR     | predicted |
| CID5316821   | SMN1     | predicted |
| CID5316821   | GAA      | predicted |
| CID5316821   | HSP90AA1 | predicted |
| CID5316821   | PSIP1    | predicted |
| CID5316821   | KDM4E    | predicted |
| CID5316821   | ALOX15   | predicted |

|              |          |           |
|--------------|----------|-----------|
| CID5316821   | CYP19A1  | predicted |
| CID5316821   | L3MBTL1  | predicted |
| CID5316821   | PTPN1    | predicted |
| CID101345697 | CYP3A4   | predicted |
| CID101345697 | MAPT     | predicted |
| CID101345697 | LMNA     | predicted |
| CID101345697 | AKR1B1   | predicted |
| CID101345697 | TDP1     | predicted |
| CID101345697 | RAB9A    | predicted |
| CID101345697 | SMN1     | predicted |
| CID101345697 | NPC1     | predicted |
| CID101345697 | TSHR     | predicted |
| CID101345697 | HSP90AA1 | predicted |
| CID101345697 | CA9      | predicted |
| CID101345697 | KMT2A    | predicted |
| CID101345697 | POLB     | predicted |
| CID101345697 | ALDH1A1  | predicted |
| CID101345697 | CYP19A1  | predicted |
| CID101345697 | TP53     | predicted |
| CID101345697 | PTPN1    | predicted |
| CID101345697 | IL2      | predicted |
| CID101345697 | KDM4E    | predicted |
| CID101345697 | CA1      | predicted |
| CID91884993  | CYP3A4   | predicted |
| CID91884993  | MAPT     | predicted |
| CID91884993  | LMNA     | predicted |
| CID91884993  | TDP1     | predicted |
| CID91884993  | AKR1B1   | predicted |
| CID91884993  | RAB9A    | predicted |
| CID91884993  | TSHR     | predicted |
| CID91884993  | SMN1     | predicted |
| CID91884993  | NPC1     | predicted |
| CID91884993  | HSP90AA1 | predicted |
| CID91884993  | POLB     | predicted |
| CID91884993  | IL2      | predicted |
| CID91884993  | ABCG2    | predicted |
| CID91884993  | CYP19A1  | predicted |
| CID91884993  | KMT2A    | predicted |
| CID91884993  | KDM4E    | predicted |
| CID91884993  | ALDH1A1  | predicted |
| CID91884993  | CA9      | predicted |
| CID91884993  | APEX1    | predicted |
| CID91884993  | PTPN1    | predicted |
| CID5705522   | LMNA     | predicted |
| CID5705522   | CYP3A4   | predicted |
| CID5705522   | HSP90AA1 | predicted |
| CID5705522   | MAPT     | predicted |
| CID5705522   | RAB9A    | predicted |
| CID5705522   | SMN1     | predicted |
| CID5705522   | NPC1     | predicted |
| CID5705522   | TDP1     | predicted |
| CID5705522   | TSHR     | predicted |
| CID5705522   | AKR1B1   | predicted |
| CID5705522   | PTPN1    | predicted |
| CID5705522   | IL2      | predicted |
| CID5705522   | TP53     | predicted |
| CID5705522   | POLB     | predicted |
| CID5705522   | ALDH1A1  | predicted |



|              |          |           |
|--------------|----------|-----------|
| CID5705522   | L3MBTL1  | predicted |
| CID5705522   | KMT2A    | predicted |
| CID5705522   | F10      | predicted |
| CID5705522   | MAPK1    | predicted |
| CID5705522   | PRKCA    | predicted |
| CID101345696 | CYP3A4   | predicted |
| CID101345696 | MAPT     | predicted |
| CID101345696 | LMNA     | predicted |
| CID101345696 | TDP1     | predicted |
| CID101345696 | RAB9A    | predicted |
| CID101345696 | IL2      | predicted |
| CID101345696 | AKR1B1   | predicted |
| CID101345696 | NPC1     | predicted |
| CID101345696 | SMN1     | predicted |
| CID101345696 | TSHR     | predicted |
| CID101345696 | POLB     | predicted |
| CID101345696 | ABCG2    | predicted |
| CID101345696 | APEX1    | predicted |
| CID101345696 | ACHE     | predicted |
| CID101345696 | CYP19A1  | predicted |
| CID101345696 | HSP90AA1 | predicted |
| CID101345696 | KDM4E    | predicted |
| CID101345696 | L3MBTL1  | predicted |
| CID101345696 | GAA      | predicted |
| CID101345696 | PSIP1    | predicted |
| CID12002015  | CYP3A4   | predicted |
| CID12002015  | MAPT     | predicted |
| CID12002015  | LMNA     | predicted |
| CID12002015  | HSP90AA1 | predicted |
| CID12002015  | RAB9A    | predicted |
| CID12002015  | TDP1     | predicted |
| CID12002015  | AKR1B1   | predicted |
| CID12002015  | NPC1     | predicted |
| CID12002015  | SMN1     | predicted |
| CID12002015  | TSHR     | predicted |
| CID12002015  | PTPN1    | predicted |
| CID12002015  | IL2      | predicted |
| CID12002015  | KMT2A    | predicted |
| CID12002015  | POLB     | predicted |
| CID12002015  | TP53     | predicted |
| CID12002015  | CYP19A1  | predicted |
| CID12002015  | L3MBTL1  | predicted |
| CID12002015  | ALDH1A1  | predicted |
| CID12002015  | ABCG2    | predicted |
| CID12002015  | CA9      | predicted |
| CID92123     | CYP3A4   | predicted |
| CID92123     | LMNA     | predicted |
| CID92123     | MAPT     | predicted |
| CID92123     | RAB9A    | predicted |
| CID92123     | NPC1     | predicted |
| CID92123     | IL2      | predicted |
| CID92123     | TDP1     | predicted |
| CID92123     | ABCG2    | predicted |
| CID92123     | SMN1     | predicted |
| CID92123     | AKR1B1   | predicted |
| CID92123     | CYP19A1  | predicted |
| CID92123     | POLB     | predicted |
| CID92123     | TSHR     | predicted |

|             |          |           |
|-------------|----------|-----------|
| CID92123    | ALDH1A1  | predicted |
| CID92123    | HSP90AA1 | predicted |
| CID92123    | APEX1    | predicted |
| CID92123    | KMT2A    | predicted |
| CID92123    | L3MBTL1  | predicted |
| CID92123    | MAPK1    | predicted |
| CID92123    | CA1      | predicted |
| CID21603202 | LMNA     | predicted |
| CID21603202 | HSP90AA1 | predicted |
| CID21603202 | CYP3A4   | predicted |
| CID21603202 | MAPT     | predicted |
| CID21603202 | AKR1B1   | predicted |
| CID21603202 | RAB9A    | predicted |
| CID21603202 | TSHR     | predicted |
| CID21603202 | TDP1     | predicted |
| CID21603202 | SMN1     | predicted |
| CID21603202 | NPC1     | predicted |
| CID21603202 | IL2      | predicted |
| CID21603202 | PTPN1    | predicted |
| CID21603202 | POLB     | predicted |
| CID21603202 | L3MBTL1  | predicted |
| CID21603202 | KMT2A    | predicted |
| CID21603202 | AKR1B10  | predicted |
| CID21603202 | TP53     | predicted |
| CID21603202 | CYP19A1  | predicted |
| CID21603202 | ALDH1A1  | predicted |
| CID21603202 | CA9      | predicted |
| CID11944602 | MAPT     | predicted |
| CID11944602 | CYP3A4   | predicted |
| CID11944602 | LMNA     | predicted |
| CID11944602 | HSP90AA1 | predicted |
| CID11944602 | TDP1     | predicted |
| CID11944602 | RAB9A    | predicted |
| CID11944602 | NPC1     | predicted |
| CID11944602 | SMN1     | predicted |
| CID11944602 | TSHR     | predicted |
| CID11944602 | AKR1B1   | predicted |
| CID11944602 | PTPN1    | predicted |
| CID11944602 | POLB     | predicted |
| CID11944602 | IL2      | predicted |
| CID11944602 | CYP19A1  | predicted |
| CID11944602 | L3MBTL1  | predicted |
| CID11944602 | BACE1    | predicted |
| CID11944602 | CA1      | predicted |
| CID11944602 | KDM4E    | predicted |
| CID11944602 | KMT2A    | predicted |
| CID11944602 | ALDH1A1  | predicted |
| CID24121289 | CYP3A4   | predicted |
| CID24121289 | MAPT     | predicted |
| CID24121289 | LMNA     | predicted |
| CID24121289 | HSP90AA1 | predicted |
| CID24121289 | RAB9A    | predicted |
| CID24121289 | TDP1     | predicted |
| CID24121289 | AKR1B1   | predicted |
| CID24121289 | NPC1     | predicted |
| CID24121289 | SMN1     | predicted |
| CID24121289 | TSHR     | predicted |
| CID24121289 | PTPN1    | predicted |

|              |         |           |
|--------------|---------|-----------|
| CID24121289  | IL2     | predicted |
| CID24121289  | KMT2A   | predicted |
| CID24121289  | POLB    | predicted |
| CID24121289  | L3MBTL1 | predicted |
| CID24121289  | TP53    | predicted |
| CID24121289  | CYP19A1 | predicted |
| CID24121289  | ALDH1A1 | predicted |
| CID24121289  | CA9     | predicted |
| CID24121289  | KDM4E   | predicted |
| CID129716195 | LMNA    | predicted |
| CID129716195 | TSHR    | predicted |
| CID129716195 | ESR1    | predicted |
| CID129716195 | CYP3A4  | predicted |
| CID129716195 | PTPN1   | predicted |
| CID129716195 | MAPT    | predicted |
| CID129716195 | MAPK1   | predicted |
| CID129716195 | EED     | predicted |
| CID129716195 | SMN1    | predicted |
| CID129716195 | ESR2    | predicted |
| CID129716195 | ALDH1A1 | predicted |
| CID129716195 | TDP1    | predicted |
| CID129716195 | BACE1   | predicted |
| CID129716195 | ALOX15  | predicted |
| CID129716195 | TAAR1   | predicted |
| CID129716195 | RAB9A   | predicted |
| CID129716195 | THRB    | predicted |
| CID129716195 | CYP19A1 | predicted |
| CID129716195 | TP53    | predicted |
| CID129716195 | L3MBTL1 | predicted |
| CID45098905  | LMNA    | predicted |
| CID45098905  | TSHR    | predicted |
| CID45098905  | PTPN1   | predicted |
| CID45098905  | MAPT    | predicted |
| CID45098905  | CYP3A4  | predicted |
| CID45098905  | ESR1    | predicted |
| CID45098905  | SMN1    | predicted |
| CID45098905  | TDP1    | predicted |
| CID45098905  | CYP19A1 | predicted |
| CID45098905  | MAPK1   | predicted |
| CID45098905  | HMGCR   | predicted |
| CID45098905  | ESR2    | predicted |
| CID45098905  | ALDH1A1 | predicted |
| CID45098905  | EED     | predicted |
| CID45098905  | PPARG   | predicted |
| CID45098905  | NFKB1   | predicted |
| CID45098905  | RAB9A   | predicted |
| CID45098905  | KMT2A   | predicted |
| CID45098905  | BACE1   | predicted |
| CID45098905  | KDM4E   | predicted |
| CID45093251  | LMNA    | predicted |
| CID45093251  | TSHR    | predicted |
| CID45093251  | MAPT    | predicted |
| CID45093251  | CYP3A4  | predicted |
| CID45093251  | PTPN1   | predicted |
| CID45093251  | SMN1    | predicted |
| CID45093251  | TDP1    | predicted |
| CID45093251  | ALDH1A1 | predicted |
| CID45093251  | CYP19A1 | predicted |

|             |          |           |
|-------------|----------|-----------|
| CID45093251 | ESR1     | predicted |
| CID45093251 | MAPK1    | predicted |
| CID45093251 | RAB9A    | predicted |
| CID45093251 | KMT2A    | predicted |
| CID45093251 | CA1      | predicted |
| CID45093251 | CA9      | predicted |
| CID45093251 | NPC1     | predicted |
| CID45093251 | EED      | predicted |
| CID45093251 | PPARG    | predicted |
| CID45093251 | ESR2     | predicted |
| CID45093251 | ACHE     | predicted |
| CID9986606  | CYP3A4   | predicted |
| CID9986606  | MAPT     | predicted |
| CID9986606  | AKR1B1   | predicted |
| CID9986606  | LMNA     | predicted |
| CID9986606  | TDP1     | predicted |
| CID9986606  | RAB9A    | predicted |
| CID9986606  | TSHR     | predicted |
| CID9986606  | SMN1     | predicted |
| CID9986606  | NPC1     | predicted |
| CID9986606  | HSP90AA1 | predicted |
| CID9986606  | POLB     | predicted |
| CID9986606  | IL2      | predicted |
| CID9986606  | APEX1    | predicted |
| CID9986606  | KDM4E    | predicted |
| CID9986606  | CYP19A1  | predicted |
| CID9986606  | PTPN1    | predicted |
| CID9986606  | KMT2A    | predicted |
| CID9986606  | CA9      | predicted |
| CID9986606  | GAA      | predicted |
| CID9986606  | ALDH1A1  | predicted |
| CID9831187  | CYP3A4   | predicted |
| CID9831187  | MAPT     | predicted |
| CID9831187  | LMNA     | predicted |
| CID9831187  | AKR1B1   | predicted |
| CID9831187  | TDP1     | predicted |
| CID9831187  | RAB9A    | predicted |
| CID9831187  | TSHR     | predicted |
| CID9831187  | SMN1     | predicted |
| CID9831187  | NPC1     | predicted |
| CID9831187  | HSP90AA1 | predicted |
| CID9831187  | POLB     | predicted |
| CID9831187  | IL2      | predicted |
| CID9831187  | CYP19A1  | predicted |
| CID9831187  | ABCG2    | predicted |
| CID9831187  | KMT2A    | predicted |
| CID9831187  | CA9      | predicted |
| CID9831187  | ALDH1A1  | predicted |
| CID9831187  | KDM4E    | predicted |
| CID9831187  | PTPN1    | predicted |
| CID9831187  | TP53     | predicted |
| CID10073778 | CYP3A4   | predicted |
| CID10073778 | LMNA     | predicted |
| CID10073778 | MAPT     | predicted |
| CID10073778 | AKR1B1   | predicted |
| CID10073778 | TDP1     | predicted |
| CID10073778 | IL2      | predicted |
| CID10073778 | RAB9A    | predicted |

|             |          |           |
|-------------|----------|-----------|
| CID10073778 | POLB     | predicted |
| CID10073778 | APEX1    | predicted |
| CID10073778 | NPC1     | predicted |
| CID10073778 | TSHR     | predicted |
| CID10073778 | SMN1     | predicted |
| CID10073778 | GAA      | predicted |
| CID10073778 | HSP90AA1 | predicted |
| CID10073778 | PSIP1    | predicted |
| CID10073778 | KDM4E    | predicted |
| CID10073778 | ALOX15   | predicted |
| CID10073778 | CYP19A1  | predicted |
| CID10073778 | L3MBTL1  | predicted |
| CID10073778 | PTPN1    | predicted |
| CID25115815 | CYP3A4   | predicted |
| CID25115815 | MAPT     | predicted |
| CID25115815 | LMNA     | predicted |
| CID25115815 | TDP1     | predicted |
| CID25115815 | RAB9A    | predicted |
| CID25115815 | NPC1     | predicted |
| CID25115815 | HSP90AA1 | predicted |
| CID25115815 | SMN1     | predicted |
| CID25115815 | TSHR     | predicted |
| CID25115815 | AKR1B1   | predicted |
| CID25115815 | PTPN1    | predicted |
| CID25115815 | POLB     | predicted |
| CID25115815 | CYP19A1  | predicted |
| CID25115815 | CA9      | predicted |
| CID25115815 | CA1      | predicted |
| CID25115815 | KMT2A    | predicted |
| CID25115815 | ALDH1A1  | predicted |
| CID25115815 | IL2      | predicted |
| CID25115815 | BACE1    | predicted |
| CID25115815 | KDM4E    | predicted |
| CID107936   | MAPT     | predicted |
| CID107936   | TOP2A    | predicted |
| CID107936   | CYP3A4   | predicted |
| CID107936   | ALDH1A1  | predicted |
| CID107936   | CYP1A2   | predicted |
| CID107936   | TSHR     | predicted |
| CID107936   | LMNA     | predicted |
| CID107936   | CYP2C19  | predicted |
| CID107936   | HSD17B10 | predicted |
| CID107936   | MAOA     | predicted |
| CID107936   | MAPK1    | predicted |
| CID107936   | ACHE     | predicted |
| CID107936   | TP53     | predicted |
| CID107936   | ABCG2    | predicted |
| CID107936   | NPC1     | predicted |
| CID107936   | HPGD     | predicted |
| CID107936   | RAB9A    | predicted |
| CID107936   | ESR1     | predicted |
| CID107936   | PTPN1    | predicted |
| CID107936   | TOP1     | predicted |
| CID10393    | CA1      | predicted |
| CID10393    | CA14     | predicted |
| CID10393    | CA12     | predicted |
| CID10393    | CA6      | predicted |
| CID10393    | CA7      | predicted |

|          |          |           |
|----------|----------|-----------|
| CID10393 | CA4      | predicted |
| CID10393 | CA9      | predicted |
| CID10393 | CA3      | predicted |
| CID10393 | HCAR2    | predicted |
| CID10393 | LMNA     | predicted |
| CID10393 | TSHR     | predicted |
| CID10393 | CASP2    | predicted |
| CID10393 | CYP3A4   | predicted |
| CID10393 | THPO     | predicted |
| CID10393 | CA13     | predicted |
| CID10393 | HSD17B10 | predicted |
| CID10393 | TDP1     | predicted |
| CID10393 | HRH4     | predicted |
| CID10393 | SERPINE1 | predicted |
| CID10393 | MTOR     | predicted |
| CID10393 | CA5A     | Known     |
| CID10393 | CA5B     | Known     |
| CID10393 | CA2      | Known     |
| CID6949  | LMNA     | predicted |
| CID6949  | PTPN1    | predicted |
| CID6949  | TSHR     | predicted |
| CID6949  | MAPT     | predicted |
| CID6949  | CYP3A4   | predicted |
| CID6949  | GPBAR1   | predicted |
| CID6949  | RAB9A    | predicted |
| CID6949  | CYP19A1  | predicted |
| CID6949  | ALDH1A1  | predicted |
| CID6949  | HSD11B1  | predicted |
| CID6949  | ALOX15   | predicted |
| CID6949  | ACHE     | predicted |
| CID6949  | TDP1     | predicted |
| CID6949  | KMT2A    | predicted |
| CID6949  | XBP1     | predicted |
| CID6949  | ALOX5    | predicted |
| CID6949  | NPC1     | predicted |
| CID6949  | SMN1     | predicted |
| CID6949  | TP53     | predicted |
| CID6949  | NR1H3    | predicted |
| CID7439  | PTPN1    | predicted |
| CID7439  | LMNA     | predicted |
| CID7439  | MAPT     | predicted |
| CID7439  | CYP19A1  | predicted |
| CID7439  | TSHR     | predicted |
| CID7439  | CYP3A4   | predicted |
| CID7439  | ALOX5    | predicted |
| CID7439  | ALDH1A1  | predicted |
| CID7439  | SMN1     | predicted |
| CID7439  | TNF      | predicted |
| CID7439  | RAB9A    | predicted |
| CID7439  | GPBAR1   | predicted |
| CID7439  | ACHE     | predicted |
| CID7439  | MPEG1    | predicted |
| CID7439  | TDP1     | predicted |
| CID7439  | MAPK1    | predicted |
| CID7439  | KMT2A    | predicted |
| CID7439  | ABCG2    | predicted |
| CID7439  | SHBG     | predicted |
| CID7439  | TP53     | predicted |

|           |          |           |
|-----------|----------|-----------|
| CID31244  | CYP2A13  | predicted |
| CID31244  | TRPA1    | predicted |
| CID31244  | TAAR1    | predicted |
| CID31244  | HPGD     | predicted |
| CID31244  | MAPT     | predicted |
| CID31244  | CYP1A2   | predicted |
| CID31244  | HSD17B10 | predicted |
| CID31244  | ALOX15   | predicted |
| CID31244  | TDP1     | predicted |
| CID31244  | CYP2E1   | predicted |
| CID31244  | CYP3A4   | predicted |
| CID31244  | LMNA     | predicted |
| CID31244  | MIF      | predicted |
| CID31244  | CYP2D6   | predicted |
| CID31244  | TSHR     | predicted |
| CID31244  | CYP2C19  | predicted |
| CID31244  | IMPDH2   | predicted |
| CID31244  | KDM4E    | predicted |
| CID31244  | MAPK1    | predicted |
| CID31244  | CYP2C9   | predicted |
| CID31244  | CYP2A6   | Known     |
| CID31244  | ALDH1A1  | Known     |
| CID519960 | NR1H3    | predicted |
| CID519960 | PTPN1    | predicted |
| CID519960 | PRKCD    | predicted |
| CID519960 | LMNA     | predicted |
| CID519960 | GPBAR1   | predicted |
| CID519960 | MAPT     | predicted |
| CID519960 | TSHR     | predicted |
| CID519960 | XBP1     | predicted |
| CID519960 | HSD11B1  | predicted |
| CID519960 | SHBG     | predicted |
| CID519960 | RAB9A    | predicted |
| CID519960 | PRKCA    | predicted |
| CID519960 | ESR1     | predicted |
| CID519960 | ACHE     | predicted |
| CID519960 | NPC1     | predicted |
| CID519960 | CYP3A4   | predicted |
| CID519960 | CYP19A1  | predicted |
| CID519960 | HSD11B2  | predicted |
| CID519960 | ESR2     | predicted |
| CID519960 | SLCO1B3  | predicted |
| CID61130  | PTPN1    | predicted |
| CID61130  | TSHR     | predicted |
| CID61130  | LMNA     | predicted |
| CID61130  | MAPT     | predicted |
| CID61130  | CYP3A4   | predicted |
| CID61130  | GPBAR1   | predicted |
| CID61130  | HSD11B1  | predicted |
| CID61130  | ALDH1A1  | predicted |
| CID61130  | RAB9A    | predicted |
| CID61130  | CYP19A1  | predicted |
| CID61130  | SMN1     | predicted |
| CID61130  | TNF      | predicted |
| CID61130  | NPC1     | predicted |
| CID61130  | TDP1     | predicted |
| CID61130  | TP53     | predicted |
| CID61130  | SLCO1B3  | predicted |

|           |         |           |
|-----------|---------|-----------|
| CID61130  | AKR1B10 | predicted |
| CID61130  | PTPN2   | predicted |
| CID61130  | MAPK1   | predicted |
| CID61130  | SLCO1B1 | predicted |
| CID62367  | PTPN1   | predicted |
| CID62367  | LMNA    | predicted |
| CID62367  | GPBAR1  | predicted |
| CID62367  | NR1H3   | predicted |
| CID62367  | TSHR    | predicted |
| CID62367  | PRKCD   | predicted |
| CID62367  | MAPT    | predicted |
| CID62367  | RAB9A   | predicted |
| CID62367  | NPC1    | predicted |
| CID62367  | CYP3A4  | predicted |
| CID62367  | HSD11B1 | predicted |
| CID62367  | SHBG    | predicted |
| CID62367  | ESR1    | predicted |
| CID62367  | SMN1    | predicted |
| CID62367  | XBP1    | predicted |
| CID62367  | PRKCA   | predicted |
| CID62367  | CYP19A1 | predicted |
| CID62367  | AKR1B10 | predicted |
| CID62367  | NPSR1   | predicted |
| CID62367  | SLCO1B1 | predicted |
| CID519779 | PTPN1   | predicted |
| CID519779 | TSHR    | predicted |
| CID519779 | LMNA    | predicted |
| CID519779 | GPBAR1  | predicted |
| CID519779 | CYP3A4  | predicted |
| CID519779 | MAPT    | predicted |
| CID519779 | HSD11B1 | predicted |
| CID519779 | RAB9A   | predicted |
| CID519779 | SHBG    | predicted |
| CID519779 | SLCO1B3 | predicted |
| CID519779 | NPC1    | predicted |
| CID519779 | SLCO1B1 | predicted |
| CID519779 | CYP19A1 | predicted |
| CID519779 | SMN1    | predicted |
| CID519779 | TP53    | predicted |
| CID519779 | PTPN2   | predicted |
| CID519779 | TDP1    | predicted |
| CID519779 | TNF     | predicted |
| CID519779 | ALDH1A1 | predicted |
| CID519779 | XBP1    | predicted |
| CID100067 | CYP3A4  | predicted |
| CID100067 | MAPT    | predicted |
| CID100067 | CYP19A1 | predicted |
| CID100067 | LMNA    | predicted |
| CID100067 | BACE1   | predicted |
| CID100067 | ABCG2   | predicted |
| CID100067 | TDP1    | predicted |
| CID100067 | PTPN1   | predicted |
| CID100067 | ALDH1A1 | predicted |
| CID100067 | RAB9A   | predicted |
| CID100067 | SMN1    | predicted |
| CID100067 | TSHR    | predicted |
| CID100067 | ACHE    | predicted |
| CID100067 | MAPK1   | predicted |



|            |          |           |
|------------|----------|-----------|
| CID100067  | NPC1     | predicted |
| CID100067  | KDM4E    | predicted |
| CID100067  | ALOX15   | predicted |
| CID100067  | KMT2A    | predicted |
| CID100067  | POLB     | predicted |
| CID100067  | TP53     | predicted |
| CID5459010 | CYP3A4   | predicted |
| CID5459010 | MAPT     | predicted |
| CID5459010 | LMNA     | predicted |
| CID5459010 | AKR1B1   | predicted |
| CID5459010 | TDP1     | predicted |
| CID5459010 | TSHR     | predicted |
| CID5459010 | RAB9A    | predicted |
| CID5459010 | SMN1     | predicted |
| CID5459010 | POLB     | predicted |
| CID5459010 | NPC1     | predicted |
| CID5459010 | HSP90AA1 | predicted |
| CID5459010 | GAA      | predicted |
| CID5459010 | KDM4E    | predicted |
| CID5459010 | APEX1    | predicted |
| CID5459010 | CYP19A1  | predicted |
| CID5459010 | KMT2A    | predicted |
| CID5459010 | PTPN1    | predicted |
| CID5459010 | ALDH1A1  | predicted |
| CID5459010 | ALOX15   | predicted |
| CID5459010 | CA9      | predicted |
| CID5280804 | MAPT     | predicted |
| CID5280804 | CYP3A4   | predicted |
| CID5280804 | ABCG2    | predicted |
| CID5280804 | RAB9A    | predicted |
| CID5280804 | TDP1     | predicted |
| CID5280804 | CYP19A1  | predicted |
| CID5280804 | AKR1B1   | predicted |
| CID5280804 | LMNA     | predicted |
| CID5280804 | NPC1     | predicted |
| CID5280804 | POLB     | predicted |
| CID5280804 | APEX1    | predicted |
| CID5280804 | KDM4E    | predicted |
| CID5280804 | GAA      | predicted |
| CID5280804 | BACE1    | predicted |
| CID5280804 | IL2      | predicted |
| CID5280804 | SMN1     | predicted |
| CID5280804 | MAPK1    | predicted |
| CID5280804 | KMT2A    | predicted |
| CID5280804 | PTPN1    | predicted |
| CID5280804 | ALOX15   | predicted |
| CID5320861 | CYP3A4   | predicted |
| CID5320861 | MAPT     | predicted |
| CID5320861 | LMNA     | predicted |
| CID5320861 | TDP1     | predicted |
| CID5320861 | CYP19A1  | predicted |
| CID5320861 | SMN1     | predicted |
| CID5320861 | RAB9A    | predicted |
| CID5320861 | ABCG2    | predicted |
| CID5320861 | KDM4E    | predicted |
| CID5320861 | TSHR     | predicted |
| CID5320861 | AKR1B1   | predicted |
| CID5320861 | NPC1     | predicted |

|            |         |           |
|------------|---------|-----------|
| CID5320861 | POLB    | predicted |
| CID5320861 | PTPN1   | predicted |
| CID5320861 | APEX1   | predicted |
| CID5320861 | MAPK1   | predicted |
| CID5320861 | ALOX15  | predicted |
| CID5320861 | BACE1   | predicted |
| CID5320861 | TP53    | predicted |
| CID5320861 | ALDH1A1 | predicted |
| CID10128   | PTPN1   | predicted |
| CID10128   | LMNA    | predicted |
| CID10128   | TSHR    | predicted |
| CID10128   | GPBAR1  | predicted |
| CID10128   | CYP3A4  | predicted |
| CID10128   | MAPT    | predicted |
| CID10128   | HSD11B1 | predicted |
| CID10128   | RAB9A   | predicted |
| CID10128   | NPC1    | predicted |
| CID10128   | SHBG    | predicted |
| CID10128   | SMN1    | predicted |
| CID10128   | AKR1B10 | predicted |
| CID10128   | CYP19A1 | predicted |
| CID10128   | SLCO1B1 | predicted |
| CID10128   | SLCO1B3 | predicted |
| CID10128   | MAPK1   | predicted |
| CID10128   | TP53    | predicted |
| CID10128   | PTPN2   | predicted |
| CID10128   | XBP1    | predicted |
| CID10128   | KMT2A   | predicted |
| CID68316   | PTPN1   | predicted |
| CID68316   | ESR1    | predicted |
| CID68316   | EED     | predicted |
| CID68316   | CYP3A4  | predicted |
| CID68316   | ALDH1A1 | predicted |
| CID68316   | ESR2    | predicted |
| CID68316   | MAPT    | predicted |
| CID68316   | TSHR    | predicted |
| CID68316   | MAPK1   | predicted |
| CID68316   | ALOX15  | predicted |
| CID68316   | ACHE    | predicted |
| CID68316   | LMNA    | predicted |
| CID68316   | PTPRC   | predicted |
| CID68316   | CYP2A6  | predicted |
| CID68316   | KMT2A   | predicted |
| CID68316   | ALOX5   | predicted |
| CID68316   | PLA2G1B | predicted |
| CID68316   | OPRK1   | predicted |
| CID68316   | SLCO1B3 | predicted |
| CID68316   | SMN1    | predicted |
| CID534497  | PTPN1   | predicted |
| CID534497  | LMNA    | predicted |
| CID534497  | NR1H3   | predicted |
| CID534497  | GPBAR1  | predicted |
| CID534497  | PRKCD   | predicted |
| CID534497  | MAPT    | predicted |
| CID534497  | TSHR    | predicted |
| CID534497  | CYP3A4  | predicted |
| CID534497  | RAB9A   | predicted |
| CID534497  | HSD11B1 | predicted |

|             |         |           |
|-------------|---------|-----------|
| CID534497   | SHBG    | predicted |
| CID534497   | NPC1    | predicted |
| CID534497   | SMN1    | predicted |
| CID534497   | ESR1    | predicted |
| CID534497   | XBP1    | predicted |
| CID534497   | ACHE    | predicted |
| CID534497   | CYP19A1 | predicted |
| CID534497   | PRKCA   | predicted |
| CID534497   | TDP1    | predicted |
| CID534497   | NPSR1   | predicted |
| CID68081    | CYP3A4  | predicted |
| CID68081    | MAPT    | predicted |
| CID68081    | ALDH1A1 | predicted |
| CID68081    | LMNA    | predicted |
| CID68081    | PTPN1   | predicted |
| CID68081    | MAPK1   | predicted |
| CID68081    | BACE1   | predicted |
| CID68081    | ABCG2   | predicted |
| CID68081    | TSHR    | predicted |
| CID68081    | NPC1    | predicted |
| CID68081    | RAB9A   | predicted |
| CID68081    | TP53    | predicted |
| CID68081    | PDE4D   | predicted |
| CID68081    | CYP19A1 | predicted |
| CID68081    | ESR1    | predicted |
| CID68081    | CYP2C19 | predicted |
| CID68081    | TDP1    | predicted |
| CID68081    | SMN1    | predicted |
| CID68081    | KMT2A   | predicted |
| CID68081    | MAOA    | predicted |
| CID98409    | DRD1    | predicted |
| CID98409    | CYP3A4  | predicted |
| CID98409    | MAPT    | predicted |
| CID98409    | F3      | predicted |
| CID98409    | DRD2    | predicted |
| CID98409    | CYP2D6  | predicted |
| CID98409    | LMNA    | predicted |
| CID98409    | TDP1    | predicted |
| CID98409    | ALDH1A1 | predicted |
| CID98409    | ACHE    | predicted |
| CID98409    | TAAR1   | predicted |
| CID98409    | MAOA    | predicted |
| CID98409    | CYP2C19 | predicted |
| CID98409    | NPC1    | predicted |
| CID98409    | RAB9A   | predicted |
| CID98409    | KMT2A   | predicted |
| CID98409    | HTR1A   | predicted |
| CID98409    | USP2    | predicted |
| CID98409    | TSHR    | predicted |
| CID98409    | ABCG2   | predicted |
| CID11025386 | CYP3A4  | predicted |
| CID11025386 | MAPT    | predicted |
| CID11025386 | DRD1    | predicted |
| CID11025386 | LMNA    | predicted |
| CID11025386 | F3      | predicted |
| CID11025386 | MAOA    | predicted |
| CID11025386 | NPC1    | predicted |
| CID11025386 | RAB9A   | predicted |

|             |         |           |
|-------------|---------|-----------|
| CID11025386 | CYP2D6  | predicted |
| CID11025386 | ABCG2   | predicted |
| CID11025386 | TDP1    | predicted |
| CID11025386 | CYP2C19 | predicted |
| CID11025386 | SMN1    | predicted |
| CID11025386 | CYP19A1 | predicted |
| CID11025386 | KMT2A   | predicted |
| CID11025386 | ACHE    | predicted |
| CID11025386 | MAPK1   | predicted |
| CID11025386 | DRD2    | predicted |
| CID11025386 | ALDH1A1 | predicted |
| CID11025386 | TSHR    | predicted |
| CID10020829 | CYP3A4  | predicted |
| CID10020829 | PDXK    | predicted |
| CID10020829 | MAPT    | predicted |
| CID10020829 | LMNA    | predicted |
| CID10020829 | ACHE    | predicted |
| CID10020829 | SMN1    | predicted |
| CID10020829 | F3      | predicted |
| CID10020829 | DRD1    | predicted |
| CID10020829 | CYP2C19 | predicted |
| CID10020829 | NPC1    | predicted |
| CID10020829 | P2RX1   | predicted |
| CID10020829 | RAB9A   | predicted |
| CID10020829 | CYP2D6  | predicted |
| CID10020829 | TP53    | predicted |
| CID10020829 | ABCG2   | predicted |
| CID10020829 | TDP1    | predicted |
| CID10020829 | TSHR    | predicted |
| CID10020829 | UBE2I   | predicted |
| CID10020829 | KDM4E   | predicted |
| CID10020829 | ALDH1A1 | predicted |
| CID363209   | CYP3A4  | predicted |
| CID363209   | MAPT    | predicted |
| CID363209   | ACHE    | predicted |
| CID363209   | LMNA    | predicted |
| CID363209   | SMN1    | predicted |
| CID363209   | NPC1    | predicted |
| CID363209   | DRD1    | predicted |
| CID363209   | RAB9A   | predicted |
| CID363209   | ABCG2   | predicted |
| CID363209   | CYP2C19 | predicted |
| CID363209   | TP53    | predicted |
| CID363209   | ALDH1A1 | predicted |
| CID363209   | TDP1    | predicted |
| CID363209   | TSHR    | predicted |
| CID363209   | KDM4E   | predicted |
| CID363209   | F3      | predicted |
| CID363209   | CTSV    | predicted |
| CID363209   | UBE2I   | predicted |
| CID363209   | MAPK1   | predicted |
| CID363209   | CYP2D6  | predicted |
| CID10914066 | LMNA    | predicted |
| CID10914066 | CA1     | predicted |
| CID10914066 | TDP1    | predicted |
| CID10914066 | MAPT    | predicted |
| CID10914066 | CA12    | predicted |
| CID10914066 | CA9     | predicted |

|             |          |           |
|-------------|----------|-----------|
| CID10914066 | CYP3A4   | predicted |
| CID10914066 | CA2      | predicted |
| CID10914066 | IL2      | predicted |
| CID10914066 | AKR1B1   | predicted |
| CID10914066 | TSHR     | predicted |
| CID10914066 | LCK      | predicted |
| CID10914066 | RAB9A    | predicted |
| CID10914066 | NPC1     | predicted |
| CID10914066 | POLB     | predicted |
| CID10914066 | SMN1     | predicted |
| CID10914066 | CYP19A1  | predicted |
| CID10914066 | HSP90AA1 | predicted |
| CID10914066 | APEX1    | predicted |
| CID10914066 | L3MBTL1  | predicted |
| CID5317435  | CYP19A1  | predicted |
| CID5317435  | MAPT     | predicted |
| CID5317435  | CYP3A4   | predicted |
| CID5317435  | ABCG2    | predicted |
| CID5317435  | MAPK1    | predicted |
| CID5317435  | LMNA     | predicted |
| CID5317435  | BACE1    | predicted |
| CID5317435  | TDP1     | predicted |
| CID5317435  | POLB     | predicted |
| CID5317435  | KDM4E    | predicted |
| CID5317435  | RAB9A    | predicted |
| CID5317435  | APEX1    | predicted |
| CID5317435  | NPC1     | predicted |
| CID5317435  | PTPN1    | predicted |
| CID5317435  | ALOX15   | predicted |
| CID5317435  | GAA      | predicted |
| CID5317435  | HSD17B10 | predicted |
| CID5317435  | KMT2A    | predicted |
| CID5317435  | MAOA     | predicted |
| CID5317435  | SMN1     | predicted |
| CID12310641 | CYP19A1  | predicted |
| CID12310641 | MAPT     | predicted |
| CID12310641 | CYP3A4   | predicted |
| CID12310641 | ABCG2    | predicted |
| CID12310641 | MAPK1    | predicted |
| CID12310641 | LMNA     | predicted |
| CID12310641 | BACE1    | predicted |
| CID12310641 | TDP1     | predicted |
| CID12310641 | POLB     | predicted |
| CID12310641 | KDM4E    | predicted |
| CID12310641 | RAB9A    | predicted |
| CID12310641 | APEX1    | predicted |
| CID12310641 | NPC1     | predicted |
| CID12310641 | PTPN1    | predicted |
| CID12310641 | ALOX15   | predicted |
| CID12310641 | GAA      | predicted |
| CID12310641 | HSD17B10 | predicted |
| CID12310641 | KMT2A    | predicted |
| CID12310641 | MAOA     | predicted |
| CID12310641 | SMN1     | predicted |
| CID3085149  | TSHR     | predicted |
| CID3085149  | LMNA     | predicted |
| CID3085149  | HMGCR    | predicted |
| CID3085149  | FAAH     | predicted |

|             |         |           |
|-------------|---------|-----------|
| CID3085149  | MPEG1   | predicted |
| CID3085149  | CYP3A4  | predicted |
| CID3085149  | MAPT    | predicted |
| CID3085149  | ALOX5   | predicted |
| CID3085149  | ACHE    | predicted |
| CID3085149  | PPARG   | predicted |
| CID3085149  | SMN1    | predicted |
| CID3085149  | PTPN1   | predicted |
| CID3085149  | TRPV1   | predicted |
| CID3085149  | FABP3   | predicted |
| CID3085149  | ALDH1A1 | predicted |
| CID3085149  | PPARA   | predicted |
| CID3085149  | PPARD   | predicted |
| CID3085149  | FNTA    | predicted |
| CID3085149  | TDP1    | predicted |
| CID3085149  | RAB9A   | predicted |
| CID11972394 | CYP3A4  | predicted |
| CID11972394 | MAPT    | predicted |
| CID11972394 | LMNA    | predicted |
| CID11972394 | TDP1    | predicted |
| CID11972394 | ABCG2   | predicted |
| CID11972394 | POLB    | predicted |
| CID11972394 | NPC1    | predicted |
| CID11972394 | RAB9A   | predicted |
| CID11972394 | SMN1    | predicted |
| CID11972394 | CYP19A1 | predicted |
| CID11972394 | APEX1   | predicted |
| CID11972394 | IL2     | predicted |
| CID11972394 | TSHR    | predicted |
| CID11972394 | AKR1B1  | predicted |
| CID11972394 | ACHE    | predicted |
| CID11972394 | MAPK1   | predicted |
| CID11972394 | PTPN1   | predicted |
| CID11972394 | SLCO2B1 | predicted |
| CID11972394 | BACE1   | predicted |
| CID11972394 | L3MBTL1 | predicted |
| CID21574499 | PTPN1   | predicted |
| CID21574499 | LMNA    | predicted |
| CID21574499 | MAPT    | predicted |
| CID21574499 | CYP3A4  | predicted |
| CID21574499 | SMN1    | predicted |
| CID21574499 | RAB9A   | predicted |
| CID21574499 | TSHR    | predicted |
| CID21574499 | TNF     | predicted |
| CID21574499 | GPBAR1  | predicted |
| CID21574499 | HSD11B1 | predicted |
| CID21574499 | AKR1B10 | predicted |
| CID21574499 | NPC1    | predicted |
| CID21574499 | PPM1B   | predicted |
| CID21574499 | TDP1    | predicted |
| CID21574499 | JUN     | predicted |
| CID21574499 | TP53    | predicted |
| CID21574499 | HTT     | predicted |
| CID21574499 | KMT2A   | predicted |
| CID21574499 | CYP19A1 | predicted |
| CID21574499 | PTPN2   | predicted |
| CID362568   | MAPT    | predicted |
| CID362568   | MAOA    | predicted |

|           |         |           |
|-----------|---------|-----------|
| CID362568 | CYP3A4  | predicted |
| CID362568 | DRD1    | predicted |
| CID362568 | F3      | predicted |
| CID362568 | LMNA    | predicted |
| CID362568 | CYP2D6  | predicted |
| CID362568 | KMT2A   | predicted |
| CID362568 | DRD2    | predicted |
| CID362568 | ABCG2   | predicted |
| CID362568 | ACHE    | predicted |
| CID362568 | ALDH1A1 | predicted |
| CID362568 | TDP1    | predicted |
| CID362568 | USP2    | predicted |
| CID362568 | PARP1   | predicted |
| CID362568 | NPC1    | predicted |
| CID362568 | TAAR1   | predicted |
| CID362568 | CYP2C19 | predicted |
| CID362568 | RAB9A   | predicted |
| CID362568 | SMN1    | predicted |
| CID52499  | DRD1    | predicted |
| CID52499  | CYP3A4  | predicted |
| CID52499  | F3      | predicted |
| CID52499  | MAPT    | predicted |
| CID52499  | CYP2D6  | predicted |
| CID52499  | DRD2    | predicted |
| CID52499  | LMNA    | predicted |
| CID52499  | ACHE    | predicted |
| CID52499  | ALDH1A1 | predicted |
| CID52499  | CYP2C19 | predicted |
| CID52499  | TDP1    | predicted |
| CID52499  | MAOA    | predicted |
| CID52499  | HTR1A   | predicted |
| CID52499  | KMT2A   | predicted |
| CID52499  | SMN1    | predicted |
| CID52499  | MAPK1   | predicted |
| CID52499  | ABCG2   | predicted |
| CID52499  | NPC1    | predicted |
| CID52499  | CHRNA2  | predicted |
| CID52499  | RAB9A   | predicted |
| CID167534 | MAPT    | predicted |
| CID167534 | CYP3A4  | predicted |
| CID167534 | ABCG2   | predicted |
| CID167534 | LMNA    | predicted |
| CID167534 | TDP1    | predicted |
| CID167534 | KDM4E   | predicted |
| CID167534 | ACHE    | predicted |
| CID167534 | KMT2A   | predicted |
| CID167534 | ALDH1A1 | predicted |
| CID167534 | MAOA    | predicted |
| CID167534 | NPC1    | predicted |
| CID167534 | RAB9A   | predicted |
| CID167534 | CTSV    | predicted |
| CID167534 | MAPK1   | predicted |
| CID167534 | CYP19A1 | predicted |
| CID167534 | SMN1    | predicted |
| CID167534 | BACE1   | predicted |
| CID167534 | ALOX15  | predicted |
| CID167534 | TSHR    | predicted |
| CID167534 | CA9     | predicted |

|             |         |           |
|-------------|---------|-----------|
| CID15726908 | DRD1    | predicted |
| CID15726908 | CYP3A4  | predicted |
| CID15726908 | F3      | predicted |
| CID15726908 | MAPT    | predicted |
| CID15726908 | CYP2D6  | predicted |
| CID15726908 | DRD2    | predicted |
| CID15726908 | LMNA    | predicted |
| CID15726908 | ACHE    | predicted |
| CID15726908 | ALDH1A1 | predicted |
| CID15726908 | MAOA    | predicted |
| CID15726908 | TDP1    | predicted |
| CID15726908 | CYP2C19 | predicted |
| CID15726908 | ABCG2   | predicted |
| CID15726908 | KMT2A   | predicted |
| CID15726908 | HTR1A   | predicted |
| CID15726908 | MAPK1   | predicted |
| CID15726908 | CHRNA2  | predicted |
| CID15726908 | NPC1    | predicted |
| CID15726908 | USP2    | predicted |
| CID15726908 | TSHR    | predicted |
| CID5321910  | CYP3A4  | predicted |
| CID5321910  | MAPT    | predicted |
| CID5321910  | DRD1    | predicted |
| CID5321910  | F3      | predicted |
| CID5321910  | CYP2D6  | predicted |
| CID5321910  | LMNA    | predicted |
| CID5321910  | CYP2C19 | predicted |
| CID5321910  | ACHE    | predicted |
| CID5321910  | RAB9A   | predicted |
| CID5321910  | TDP1    | predicted |
| CID5321910  | NPC1    | predicted |
| CID5321910  | DRD2    | predicted |
| CID5321910  | MAOA    | predicted |
| CID5321910  | ALDH1A1 | predicted |
| CID5321910  | ABCG2   | predicted |
| CID5321910  | SMN1    | predicted |
| CID5321910  | KMT2A   | predicted |
| CID5321910  | TSHR    | predicted |
| CID5321910  | CYP19A1 | predicted |
| CID5321910  | MAPK1   | predicted |
| CID335206   | DRD1    | predicted |
| CID335206   | F3      | predicted |
| CID335206   | CYP3A4  | predicted |
| CID335206   | DRD2    | predicted |
| CID335206   | MAPT    | predicted |
| CID335206   | LMNA    | predicted |
| CID335206   | CYP2D6  | predicted |
| CID335206   | ACHE    | predicted |
| CID335206   | CYP2C19 | predicted |
| CID335206   | TDP1    | predicted |
| CID335206   | SMN1    | predicted |
| CID335206   | HTR1A   | predicted |
| CID335206   | ALDH1A1 | predicted |
| CID335206   | MAPK1   | predicted |
| CID335206   | TSHR    | predicted |
| CID335206   | NPC1    | predicted |
| CID335206   | RAB9A   | predicted |
| CID335206   | MAOA    | predicted |



|             |         |           |
|-------------|---------|-----------|
| CID335206   | PTPN1   | predicted |
| CID335206   | KMT2A   | predicted |
| CID10627884 | CYP3A4  | predicted |
| CID10627884 | DRD1    | predicted |
| CID10627884 | MAPT    | predicted |
| CID10627884 | F3      | predicted |
| CID10627884 | DRD2    | predicted |
| CID10627884 | CYP2D6  | predicted |
| CID10627884 | LMNA    | predicted |
| CID10627884 | ABCG2   | predicted |
| CID10627884 | TDP1    | predicted |
| CID10627884 | ACHE    | predicted |
| CID10627884 | USP2    | predicted |
| CID10627884 | NPC1    | predicted |
| CID10627884 | ALDH1A1 | predicted |
| CID10627884 | KMT2A   | predicted |
| CID10627884 | RAB9A   | predicted |
| CID10627884 | CYP2C19 | predicted |
| CID10627884 | MAOA    | predicted |
| CID10627884 | TAAR1   | predicted |
| CID10627884 | MAPK1   | predicted |
| CID10627884 | SMN1    | predicted |
| CID10024043 | CYP3A4  | predicted |
| CID10024043 | MAPT    | predicted |
| CID10024043 | CYP19A1 | predicted |
| CID10024043 | ABCG2   | predicted |
| CID10024043 | ABCB1   | predicted |
| CID10024043 | LMNA    | predicted |
| CID10024043 | BACE1   | predicted |
| CID10024043 | ALDH1A1 | predicted |
| CID10024043 | ACHE    | predicted |
| CID10024043 | TDP1    | predicted |
| CID10024043 | ODC1    | predicted |
| CID10024043 | KMT2A   | predicted |
| CID10024043 | PTPN1   | predicted |
| CID10024043 | MAPK1   | predicted |
| CID10024043 | RAB9A   | predicted |
| CID10024043 | KDM4E   | predicted |
| CID10024043 | NPC1    | predicted |
| CID10024043 | SMN1    | predicted |
| CID10024043 | TP53    | predicted |
| CID10024043 | ALOX15  | predicted |
| CID10462037 | CYP3A4  | predicted |
| CID10462037 | MAPT    | predicted |
| CID10462037 | LMNA    | predicted |
| CID10462037 | TDP1    | predicted |
| CID10462037 | SMN1    | predicted |
| CID10462037 | CYP19A1 | predicted |
| CID10462037 | RAB9A   | predicted |
| CID10462037 | TSHR    | predicted |
| CID10462037 | ALDH1A1 | predicted |
| CID10462037 | NPC1    | predicted |
| CID10462037 | ABCG2   | predicted |
| CID10462037 | BACE1   | predicted |
| CID10462037 | PTPN1   | predicted |
| CID10462037 | KMT2A   | predicted |
| CID10462037 | AKR1B1  | predicted |
| CID10462037 | ACHE    | predicted |

|             |         |           |
|-------------|---------|-----------|
| CID10462037 | POLB    | predicted |
| CID10462037 | KDM4E   | predicted |
| CID10462037 | MAPK1   | predicted |
| CID10462037 | CA9     | predicted |
| CID10101270 | CYP3A4  | predicted |
| CID10101270 | LMNA    | predicted |
| CID10101270 | MAPT    | predicted |
| CID10101270 | TDP1    | predicted |
| CID10101270 | SMN1    | predicted |
| CID10101270 | ALDH1A1 | predicted |
| CID10101270 | TSHR    | predicted |
| CID10101270 | CYP19A1 | predicted |
| CID10101270 | RAB9A   | predicted |
| CID10101270 | NPC1    | predicted |
| CID10101270 | ABCG2   | predicted |
| CID10101270 | BACE1   | predicted |
| CID10101270 | KMT2A   | predicted |
| CID10101270 | POLB    | predicted |
| CID10101270 | MAPK1   | predicted |
| CID10101270 | PTPN1   | predicted |
| CID10101270 | AKR1B1  | predicted |
| CID10101270 | ACHE    | predicted |
| CID10101270 | TP53    | predicted |
| CID10101270 | APEX1   | predicted |
| CID10031791 | CYP3A4  | predicted |
| CID10031791 | MAPT    | predicted |
| CID10031791 | LMNA    | predicted |
| CID10031791 | SMN1    | predicted |
| CID10031791 | TDP1    | predicted |
| CID10031791 | TSHR    | predicted |
| CID10031791 | CYP19A1 | predicted |
| CID10031791 | RAB9A   | predicted |
| CID10031791 | NPC1    | predicted |
| CID10031791 | PTPN1   | predicted |
| CID10031791 | POLB    | predicted |
| CID10031791 | AKR1B1  | predicted |
| CID10031791 | ALDH1A1 | predicted |
| CID10031791 | APEX1   | predicted |
| CID10031791 | ABCG2   | predicted |
| CID10031791 | BACE1   | predicted |
| CID10031791 | KMT2A   | predicted |
| CID10031791 | KDM4E   | predicted |
| CID10031791 | MAPK1   | predicted |
| CID10031791 | ACHE    | predicted |
| CID11066    | MAPT    | predicted |
| CID11066    | MAOA    | predicted |
| CID11066    | CYP3A4  | predicted |
| CID11066    | PARP1   | predicted |
| CID11066    | LMNA    | predicted |
| CID11066    | ACHE    | predicted |
| CID11066    | F3      | predicted |
| CID11066    | DRD1    | predicted |
| CID11066    | KMT2A   | predicted |
| CID11066    | SMN1    | predicted |
| CID11066    | CYP2C19 | predicted |
| CID11066    | CYP2D6  | predicted |
| CID11066    | NPC1    | predicted |
| CID11066    | ALDH1A1 | predicted |

|             |         |           |
|-------------|---------|-----------|
| CID11066    | RAB9A   | predicted |
| CID11066    | MAPK1   | predicted |
| CID11066    | TDP1    | predicted |
| CID11066    | TSHR    | predicted |
| CID11066    | DRD2    | predicted |
| CID11066    | KDM4E   | predicted |
| CID148262   | CYP3A4  | predicted |
| CID148262   | MAPT    | predicted |
| CID148262   | LMNA    | predicted |
| CID148262   | ACHE    | predicted |
| CID148262   | SMN1    | predicted |
| CID148262   | F3      | predicted |
| CID148262   | CYP2C19 | predicted |
| CID148262   | DRD1    | predicted |
| CID148262   | NPC1    | predicted |
| CID148262   | RAB9A   | predicted |
| CID148262   | CYP2D6  | predicted |
| CID148262   | TP53    | predicted |
| CID148262   | ABCG2   | predicted |
| CID148262   | TDP1    | predicted |
| CID148262   | ALDH1A1 | predicted |
| CID148262   | KDM4E   | predicted |
| CID148262   | UBE2I   | predicted |
| CID148262   | TSHR    | predicted |
| CID148262   | MAPK1   | predicted |
| CID148262   | CTSV    | predicted |
| CID17203    | CYP3A4  | predicted |
| CID17203    | MAPT    | predicted |
| CID17203    | SLCO2B1 | predicted |
| CID17203    | CYP19A1 | predicted |
| CID17203    | LMNA    | predicted |
| CID17203    | TDP1    | predicted |
| CID17203    | ABCG2   | predicted |
| CID17203    | CYP1B1  | predicted |
| CID17203    | NPSR1   | predicted |
| CID17203    | APEX1   | predicted |
| CID17203    | TSHR    | predicted |
| CID17203    | CYP2C9  | predicted |
| CID17203    | RAB9A   | predicted |
| CID17203    | ALDH1A1 | predicted |
| CID17203    | KDM4E   | predicted |
| CID17203    | NPC1    | predicted |
| CID17203    | PTAFR   | predicted |
| CID17203    | POLB    | predicted |
| CID17203    | ALOX15  | predicted |
| CID17203    | ACHE    | predicted |
| CID44130138 | CYP3A4  | predicted |
| CID44130138 | MAPT    | predicted |
| CID44130138 | PTPN1   | predicted |
| CID44130138 | LMNA    | predicted |
| CID44130138 | KDM4E   | predicted |
| CID44130138 | ABCG2   | predicted |
| CID44130138 | ACHE    | predicted |
| CID44130138 | F3      | predicted |
| CID44130138 | TDP1    | predicted |
| CID44130138 | RAB9A   | predicted |
| CID44130138 | NPC1    | predicted |
| CID44130138 | SMN1    | predicted |

|             |         |           |
|-------------|---------|-----------|
| CID44130138 | MAOA    | predicted |
| CID44130138 | CYP2C19 | predicted |
| CID44130138 | ALDH1A1 | predicted |
| CID44130138 | TP53    | predicted |
| CID44130138 | KMT2A   | predicted |
| CID44130138 | CYP19A1 | predicted |
| CID44130138 | CYP2D6  | predicted |
| CID44130138 | MAPK1   | predicted |
| CID45490416 | CYP3A4  | predicted |
| CID45490416 | MAPT    | predicted |
| CID45490416 | LMNA    | predicted |
| CID45490416 | ACHE    | predicted |
| CID45490416 | SMN1    | predicted |
| CID45490416 | NPC1    | predicted |
| CID45490416 | RAB9A   | predicted |
| CID45490416 | CYP2C19 | predicted |
| CID45490416 | DRD1    | predicted |
| CID45490416 | TP53    | predicted |
| CID45490416 | F3      | predicted |
| CID45490416 | TDP1    | predicted |
| CID45490416 | ABCG2   | predicted |
| CID45490416 | TSHR    | predicted |
| CID45490416 | ALDH1A1 | predicted |
| CID45490416 | KDM4E   | predicted |
| CID45490416 | CYP2D6  | predicted |
| CID45490416 | UBE2I   | predicted |
| CID45490416 | CYP19A1 | predicted |
| CID45490416 | ALOX15  | predicted |
| CID5384082  | MAPT    | predicted |
| CID5384082  | MAOA    | predicted |
| CID5384082  | CYP3A4  | predicted |
| CID5384082  | PARP1   | predicted |
| CID5384082  | LMNA    | predicted |
| CID5384082  | ACHE    | predicted |
| CID5384082  | F3      | predicted |
| CID5384082  | DRD1    | predicted |
| CID5384082  | KMT2A   | predicted |
| CID5384082  | SMN1    | predicted |
| CID5384082  | CYP2C19 | predicted |
| CID5384082  | CYP2D6  | predicted |
| CID5384082  | ALDH1A1 | predicted |
| CID5384082  | RAB9A   | predicted |
| CID5384082  | NPC1    | predicted |
| CID5384082  | TSHR    | predicted |
| CID5384082  | TDP1    | predicted |
| CID5384082  | MAPK1   | predicted |
| CID5384082  | KDM4E   | predicted |
| CID5384082  | TAAR1   | predicted |
| CID644002   | CYP3A4  | predicted |
| CID644002   | MAPT    | predicted |
| CID644002   | ACHE    | predicted |
| CID644002   | LMNA    | predicted |
| CID644002   | SMN1    | predicted |
| CID644002   | NPC1    | predicted |
| CID644002   | DRD1    | predicted |
| CID644002   | ABCG2   | predicted |
| CID644002   | RAB9A   | predicted |
| CID644002   | F3      | predicted |

|             |          |           |
|-------------|----------|-----------|
| CID644002   | UBE2I    | predicted |
| CID644002   | CYP2C19  | predicted |
| CID644002   | TP53     | predicted |
| CID644002   | TDP1     | predicted |
| CID644002   | ALDH1A1  | predicted |
| CID644002   | CTSV     | predicted |
| CID644002   | CYP2D6   | predicted |
| CID644002   | KDM4E    | predicted |
| CID644002   | MAPK1    | predicted |
| CID644002   | TSHR     | predicted |
| CID9974201  | CYP3A4   | predicted |
| CID9974201  | MAPT     | predicted |
| CID9974201  | LMNA     | predicted |
| CID9974201  | ACHE     | predicted |
| CID9974201  | SMN1     | predicted |
| CID9974201  | NPC1     | predicted |
| CID9974201  | RAB9A    | predicted |
| CID9974201  | CYP2C19  | predicted |
| CID9974201  | TP53     | predicted |
| CID9974201  | DRD1     | predicted |
| CID9974201  | ALDH1A1  | predicted |
| CID9974201  | TDP1     | predicted |
| CID9974201  | F3       | predicted |
| CID9974201  | ABCG2    | predicted |
| CID9974201  | TSHR     | predicted |
| CID9974201  | KDM4E    | predicted |
| CID9974201  | CYP2D6   | predicted |
| CID9974201  | UBE2I    | predicted |
| CID9974201  | CYP19A1  | predicted |
| CID9974201  | GAA      | predicted |
| CID21722008 | CYP3A4   | predicted |
| CID21722008 | LMNA     | predicted |
| CID21722008 | MAPT     | predicted |
| CID21722008 | CYP19A1  | predicted |
| CID21722008 | RAB9A    | predicted |
| CID21722008 | TDP1     | predicted |
| CID21722008 | IL2      | predicted |
| CID21722008 | NPC1     | predicted |
| CID21722008 | AKR1B1   | predicted |
| CID21722008 | SMN1     | predicted |
| CID21722008 | APEX1    | predicted |
| CID21722008 | BACE1    | predicted |
| CID21722008 | POLB     | predicted |
| CID21722008 | ABCG2    | predicted |
| CID21722008 | TSHR     | predicted |
| CID21722008 | PTPN1    | predicted |
| CID21722008 | L3MBTL1  | predicted |
| CID21722008 | HSP90AA1 | predicted |
| CID21722008 | MAPK1    | predicted |
| CID21722008 | PSIP1    | predicted |
| CID21722007 | CYP3A4   | predicted |
| CID21722007 | LMNA     | predicted |
| CID21722007 | MAPT     | predicted |
| CID21722007 | CYP19A1  | predicted |
| CID21722007 | RAB9A    | predicted |
| CID21722007 | TDP1     | predicted |
| CID21722007 | IL2      | predicted |
| CID21722007 | NPC1     | predicted |

|             |          |           |
|-------------|----------|-----------|
| CID21722007 | AKR1B1   | predicted |
| CID21722007 | SMN1     | predicted |
| CID21722007 | APEX1    | predicted |
| CID21722007 | BACE1    | predicted |
| CID21722007 | POLB     | predicted |
| CID21722007 | ABCG2    | predicted |
| CID21722007 | TSHR     | predicted |
| CID21722007 | PTPN1    | predicted |
| CID21722007 | L3MBTL1  | predicted |
| CID21722007 | HSP90AA1 | predicted |
| CID21722007 | MAPK1    | predicted |
| CID21722007 | PSIP1    | predicted |
| CID177032   | CYP19A1  | predicted |
| CID177032   | CYP3A4   | predicted |
| CID177032   | MAPT     | predicted |
| CID177032   | ABCG2    | predicted |
| CID177032   | BACE1    | predicted |
| CID177032   | LMNA     | predicted |
| CID177032   | RAB9A    | predicted |
| CID177032   | KDM4E    | predicted |
| CID177032   | NPC1     | predicted |
| CID177032   | MAOA     | predicted |
| CID177032   | TDP1     | predicted |
| CID177032   | MAPK1    | predicted |
| CID177032   | KMT2A    | predicted |
| CID177032   | ALDH1A1  | predicted |
| CID177032   | CYP2C19  | predicted |
| CID177032   | ACHE     | predicted |
| CID177032   | ALOX15   | predicted |
| CID177032   | TSHR     | predicted |
| CID177032   | PTPN1    | predicted |
| CID177032   | POLB     | predicted |
| CID11705597 | MAPT     | predicted |
| CID11705597 | CYP3A4   | predicted |
| CID11705597 | ABCG2    | predicted |
| CID11705597 | CYP19A1  | predicted |
| CID11705597 | LMNA     | predicted |
| CID11705597 | RAB9A    | predicted |
| CID11705597 | TDP1     | predicted |
| CID11705597 | NPC1     | predicted |
| CID11705597 | BACE1    | predicted |
| CID11705597 | MAOA     | predicted |
| CID11705597 | TSHR     | predicted |
| CID11705597 | SMN1     | predicted |
| CID11705597 | AKR1B1   | predicted |
| CID11705597 | MAOB     | predicted |
| CID11705597 | TP53     | predicted |
| CID11705597 | ALDH1A1  | predicted |
| CID11705597 | POLB     | predicted |
| CID11705597 | KDM4E    | predicted |
| CID11705597 | KMT2A    | predicted |
| CID11705597 | IL2      | predicted |
| CID11691184 | BACE1    | predicted |
| CID11691184 | CYP19A1  | predicted |
| CID11691184 | CYP3A4   | predicted |
| CID11691184 | MAPT     | predicted |
| CID11691184 | LMNA     | predicted |
| CID11691184 | ABCG2    | predicted |

|             |          |           |
|-------------|----------|-----------|
| CID11691184 | PTPN1    | predicted |
| CID11691184 | TDP1     | predicted |
| CID11691184 | SMN1     | predicted |
| CID11691184 | RAB9A    | predicted |
| CID11691184 | TSHR     | predicted |
| CID11691184 | NPC1     | predicted |
| CID11691184 | POLB     | predicted |
| CID11691184 | AKR1B1   | predicted |
| CID11691184 | MAPK1    | predicted |
| CID11691184 | GAA      | predicted |
| CID11691184 | KDM4E    | predicted |
| CID11691184 | ACHE     | predicted |
| CID11691184 | KMT2A    | predicted |
| CID11691184 | TP53     | predicted |
| CID11592116 | BACE1    | predicted |
| CID11592116 | CYP19A1  | predicted |
| CID11592116 | CYP3A4   | predicted |
| CID11592116 | MAPT     | predicted |
| CID11592116 | ABCG2    | predicted |
| CID11592116 | PTPN1    | predicted |
| CID11592116 | MAOA     | predicted |
| CID11592116 | LMNA     | predicted |
| CID11592116 | RAB9A    | predicted |
| CID11592116 | NPC1     | predicted |
| CID11592116 | MAPK1    | predicted |
| CID11592116 | CYP2C19  | predicted |
| CID11592116 | TSHR     | predicted |
| CID11592116 | ALDH1A1  | predicted |
| CID11592116 | KMT2A    | predicted |
| CID11592116 | TDP1     | predicted |
| CID11592116 | TP53     | predicted |
| CID11592116 | ACHE     | predicted |
| CID11592116 | KDM4E    | predicted |
| CID11592116 | SMN1     | predicted |
| CID5318275  | CYP3A4   | predicted |
| CID5318275  | MAPT     | predicted |
| CID5318275  | LMNA     | predicted |
| CID5318275  | AKR1B1   | predicted |
| CID5318275  | TDP1     | predicted |
| CID5318275  | TSHR     | predicted |
| CID5318275  | RAB9A    | predicted |
| CID5318275  | SMN1     | predicted |
| CID5318275  | NPC1     | predicted |
| CID5318275  | POLB     | predicted |
| CID5318275  | HSP90AA1 | predicted |
| CID5318275  | KMT2A    | predicted |
| CID5318275  | ABCG2    | predicted |
| CID5318275  | CYP19A1  | predicted |
| CID5318275  | ALDH1A1  | predicted |
| CID5318275  | KDM4E    | predicted |
| CID5318275  | PTPN1    | predicted |
| CID5318275  | CA9      | predicted |
| CID5318275  | TP53     | predicted |
| CID5318275  | GAA      | predicted |
| CID3084995  | CYP19A1  | predicted |
| CID3084995  | CYP3A4   | predicted |
| CID3084995  | MAPT     | predicted |
| CID3084995  | ABCG2    | predicted |

|             |          |           |
|-------------|----------|-----------|
| CID3084995  | RAB9A    | predicted |
| CID3084995  | LMNA     | predicted |
| CID3084995  | NPC1     | predicted |
| CID3084995  | BACE1    | predicted |
| CID3084995  | TDP1     | predicted |
| CID3084995  | POLB     | predicted |
| CID3084995  | KMT2A    | predicted |
| CID3084995  | APEX1    | predicted |
| CID3084995  | SMN1     | predicted |
| CID3084995  | AKR1B1   | predicted |
| CID3084995  | MAPK1    | predicted |
| CID3084995  | IL2      | predicted |
| CID3084995  | PTPN1    | predicted |
| CID3084995  | ALDH1A1  | predicted |
| CID3084995  | L3MBTL1  | predicted |
| CID3084995  | ACHE     | predicted |
| CID5319440  | LMNA     | predicted |
| CID5319440  | CYP3A4   | predicted |
| CID5319440  | MAPT     | predicted |
| CID5319440  | IL2      | predicted |
| CID5319440  | RAB9A    | predicted |
| CID5319440  | TDP1     | predicted |
| CID5319440  | TSHR     | predicted |
| CID5319440  | NPC1     | predicted |
| CID5319440  | AKR1B1   | predicted |
| CID5319440  | SMN1     | predicted |
| CID5319440  | ABCG2    | predicted |
| CID5319440  | L3MBTL1  | predicted |
| CID5319440  | HSP90AA1 | predicted |
| CID5319440  | ALDH1A1  | predicted |
| CID5319440  | POLB     | predicted |
| CID5319440  | BACE1    | predicted |
| CID5319440  | CYP19A1  | predicted |
| CID5319440  | KDM4E    | predicted |
| CID5319440  | APEX1    | predicted |
| CID5319440  | CA9      | predicted |
| CID11685603 | CYP19A1  | predicted |
| CID11685603 | MAPT     | predicted |
| CID11685603 | CYP3A4   | predicted |
| CID11685603 | ABCG2    | predicted |
| CID11685603 | BACE1    | predicted |
| CID11685603 | MAOB     | predicted |
| CID11685603 | TDP1     | predicted |
| CID11685603 | RAB9A    | predicted |
| CID11685603 | PTPN1    | predicted |
| CID11685603 | LMNA     | predicted |
| CID11685603 | MAOA     | predicted |
| CID11685603 | NPC1     | predicted |
| CID11685603 | MAPK1    | predicted |
| CID11685603 | ALOX15   | predicted |
| CID11685603 | ALDH1A1  | predicted |
| CID11685603 | KMT2A    | predicted |
| CID11685603 | KDM4E    | predicted |
| CID11685603 | CYP2C19  | predicted |
| CID11685603 | ACHE     | predicted |
| CID11685603 | POLB     | predicted |
| CID14655552 | MAPT     | predicted |
| CID14655552 | CYP3A4   | predicted |



|            |         |           |
|------------|---------|-----------|
| CID1465552 | LMNA    | predicted |
| CID1465552 | ABCG2   | predicted |
| CID1465552 | TDP1    | predicted |
| CID1465552 | RAB9A   | predicted |
| CID1465552 | NPC1    | predicted |
| CID1465552 | SMN1    | predicted |
| CID1465552 | TSHR    | predicted |
| CID1465552 | BACE1   | predicted |
| CID1465552 | KDM4E   | predicted |
| CID1465552 | CYP19A1 | predicted |
| CID1465552 | ALDH1A1 | predicted |
| CID1465552 | AKR1B1  | predicted |
| CID1465552 | KMT2A   | predicted |
| CID1465552 | POLB    | predicted |
| CID1465552 | PTPN1   | predicted |
| CID1465552 | TP53    | predicted |
| CID1465552 | MAPK1   | predicted |
| CID1465552 | GAA     | predicted |
| CID157633  | CYP19A1 | predicted |
| CID157633  | MAPT    | predicted |
| CID157633  | CYP3A4  | predicted |
| CID157633  | ABCG2   | predicted |
| CID157633  | BACE1   | predicted |
| CID157633  | MAOA    | predicted |
| CID157633  | LMNA    | predicted |
| CID157633  | MAPK1   | predicted |
| CID157633  | RAB9A   | predicted |
| CID157633  | KMT2A   | predicted |
| CID157633  | TDP1    | predicted |
| CID157633  | NPC1    | predicted |
| CID157633  | PTPN1   | predicted |
| CID157633  | POLB    | predicted |
| CID157633  | KDM4E   | predicted |
| CID157633  | ACHE    | predicted |
| CID157633  | SMN1    | predicted |
| CID157633  | APEX1   | predicted |
| CID157633  | CYP2C19 | predicted |
| CID157633  | ALDH1A1 | predicted |
| CID130116  | CYP19A1 | predicted |
| CID130116  | MAPT    | predicted |
| CID130116  | CYP3A4  | predicted |
| CID130116  | ABCG2   | predicted |
| CID130116  | LMNA    | predicted |
| CID130116  | RAB9A   | predicted |
| CID130116  | NPC1    | predicted |
| CID130116  | TDP1    | predicted |
| CID130116  | BACE1   | predicted |
| CID130116  | POLB    | predicted |
| CID130116  | SMN1    | predicted |
| CID130116  | AKR1B1  | predicted |
| CID130116  | IL2     | predicted |
| CID130116  | APEX1   | predicted |
| CID130116  | L3MBTL1 | predicted |
| CID130116  | MAOA    | predicted |
| CID130116  | PTPN1   | predicted |
| CID130116  | MAPK1   | predicted |
| CID130116  | ACHE    | predicted |
| CID130116  | TSHR    | predicted |

|             |         |           |
|-------------|---------|-----------|
| CID3082330  | BACE1   | predicted |
| CID3082330  | CYP19A1 | predicted |
| CID3082330  | CYP3A4  | predicted |
| CID3082330  | MAPT    | predicted |
| CID3082330  | ABCG2   | predicted |
| CID3082330  | PTPN1   | predicted |
| CID3082330  | LMNA    | predicted |
| CID3082330  | MAOA    | predicted |
| CID3082330  | MAPK1   | predicted |
| CID3082330  | RAB9A   | predicted |
| CID3082330  | NPC1    | predicted |
| CID3082330  | TDP1    | predicted |
| CID3082330  | KMT2A   | predicted |
| CID3082330  | POLB    | predicted |
| CID3082330  | TP53    | predicted |
| CID3082330  | KDM4E   | predicted |
| CID3082330  | SMN1    | predicted |
| CID3082330  | CYP2C19 | predicted |
| CID3082330  | TSHR    | predicted |
| CID3082330  | ACHE    | predicted |
| CID11522086 | CYP19A1 | predicted |
| CID11522086 | MAPT    | predicted |
| CID11522086 | CYP3A4  | predicted |
| CID11522086 | ABCG2   | predicted |
| CID11522086 | MAOB    | predicted |
| CID11522086 | BACE1   | predicted |
| CID11522086 | MAOA    | predicted |
| CID11522086 | TDP1    | predicted |
| CID11522086 | LMNA    | predicted |
| CID11522086 | PTPN1   | predicted |
| CID11522086 | MAPK1   | predicted |
| CID11522086 | RAB9A   | predicted |
| CID11522086 | NPC1    | predicted |
| CID11522086 | ALOX15  | predicted |
| CID11522086 | ACHE    | predicted |
| CID11522086 | ALDH1A1 | predicted |
| CID11522086 | KMT2A   | predicted |
| CID11522086 | KDM4E   | predicted |
| CID11522086 | CYP2C19 | predicted |
| CID11522086 | ESR1    | predicted |
| CID11561476 | CYP19A1 | predicted |
| CID11561476 | CYP3A4  | predicted |
| CID11561476 | MAPT    | predicted |
| CID11561476 | ABCG2   | predicted |
| CID11561476 | LMNA    | predicted |
| CID11561476 | TDP1    | predicted |
| CID11561476 | BACE1   | predicted |
| CID11561476 | RAB9A   | predicted |
| CID11561476 | NPC1    | predicted |
| CID11561476 | POLB    | predicted |
| CID11561476 | MAOB    | predicted |
| CID11561476 | AKR1B1  | predicted |
| CID11561476 | APEX1   | predicted |
| CID11561476 | SMN1    | predicted |
| CID11561476 | PTPN1   | predicted |
| CID11561476 | IL2     | predicted |
| CID11561476 | MAPK1   | predicted |
| CID11561476 | L3MBTL1 | predicted |

|             |         |           |
|-------------|---------|-----------|
| CID11561476 | KDM4E   | predicted |
| CID11561476 | ACHE    | predicted |
| CID11510990 | CYP19A1 | predicted |
| CID11510990 | CYP3A4  | predicted |
| CID11510990 | MAPT    | predicted |
| CID11510990 | LMNA    | predicted |
| CID11510990 | TDP1    | predicted |
| CID11510990 | ABCG2   | predicted |
| CID11510990 | SMN1    | predicted |
| CID11510990 | PTPN1   | predicted |
| CID11510990 | BACE1   | predicted |
| CID11510990 | RAB9A   | predicted |
| CID11510990 | POLB    | predicted |
| CID11510990 | NPC1    | predicted |
| CID11510990 | AKR1B1  | predicted |
| CID11510990 | MAOB    | predicted |
| CID11510990 | TSHR    | predicted |
| CID11510990 | KDM4E   | predicted |
| CID11510990 | MAPK1   | predicted |
| CID11510990 | APEX1   | predicted |
| CID11510990 | GAA     | predicted |
| CID11510990 | CA1     | predicted |
| CID11705300 | MAPT    | predicted |
| CID11705300 | CYP3A4  | predicted |
| CID11705300 | LMNA    | predicted |
| CID11705300 | TDP1    | predicted |
| CID11705300 | ABCG2   | predicted |
| CID11705300 | RAB9A   | predicted |
| CID11705300 | SMN1    | predicted |
| CID11705300 | CYP19A1 | predicted |
| CID11705300 | NPC1    | predicted |
| CID11705300 | PTPN1   | predicted |
| CID11705300 | AKR1B1  | predicted |
| CID11705300 | POLB    | predicted |
| CID11705300 | KDM4E   | predicted |
| CID11705300 | BACE1   | predicted |
| CID11705300 | TSHR    | predicted |
| CID11705300 | GAA     | predicted |
| CID11705300 | KMT2A   | predicted |
| CID11705300 | ALDH1A1 | predicted |
| CID11705300 | CA1     | predicted |
| CID11705300 | MAPK1   | predicted |
| CID5322060  | MAPT    | predicted |
| CID5322060  | CYP3A4  | predicted |
| CID5322060  | ABCG2   | predicted |
| CID5322060  | MAOA    | predicted |
| CID5322060  | BACE1   | predicted |
| CID5322060  | CYP19A1 | predicted |
| CID5322060  | RAB9A   | predicted |
| CID5322060  | NPC1    | predicted |
| CID5322060  | ALDH1A1 | predicted |
| CID5322060  | KMT2A   | predicted |
| CID5322060  | KDM4E   | predicted |
| CID5322060  | TDP1    | predicted |
| CID5322060  | ABCB1   | predicted |
| CID5322060  | MAPK1   | predicted |
| CID5322060  | CTSV    | predicted |
| CID5322060  | TP53    | predicted |

|             |         |           |
|-------------|---------|-----------|
| CID5322060  | HPGD    | predicted |
| CID5322060  | ACHE    | predicted |
| CID5322060  | LMNA    | predicted |
| CID5322060  | ALOX15  | predicted |
| CID156993   | MAPT    | predicted |
| CID156993   | CYP3A4  | predicted |
| CID156993   | ABCG2   | predicted |
| CID156993   | MAOA    | predicted |
| CID156993   | ALDH1A1 | predicted |
| CID156993   | CYP19A1 | predicted |
| CID156993   | RAB9A   | predicted |
| CID156993   | NPC1    | predicted |
| CID156993   | BACE1   | predicted |
| CID156993   | KMT2A   | predicted |
| CID156993   | HPGD    | predicted |
| CID156993   | TP53    | predicted |
| CID156993   | MAPK1   | predicted |
| CID156993   | LMNA    | predicted |
| CID156993   | TDP1    | predicted |
| CID156993   | ABCB1   | predicted |
| CID156993   | TSHR    | predicted |
| CID156993   | KDM4E   | predicted |
| CID156993   | CA12    | predicted |
| CID156993   | CYP2C19 | predicted |
| CID10670361 | MAPT    | predicted |
| CID10670361 | CYP3A4  | predicted |
| CID10670361 | CYP19A1 | predicted |
| CID10670361 | LMNA    | predicted |
| CID10670361 | RAB9A   | predicted |
| CID10670361 | ABCG2   | predicted |
| CID10670361 | NPC1    | predicted |
| CID10670361 | TDP1    | predicted |
| CID10670361 | MAOB    | predicted |
| CID10670361 | MAOA    | predicted |
| CID10670361 | AKR1B1  | predicted |
| CID10670361 | IL2     | predicted |
| CID10670361 | SMN1    | predicted |
| CID10670361 | TSHR    | predicted |
| CID10670361 | SLC6A3  | predicted |
| CID10670361 | POLB    | predicted |
| CID10670361 | BACE1   | predicted |
| CID10670361 | PTPN1   | predicted |
| CID10670361 | L3MBTL1 | predicted |
| CID10670361 | ALDH1A1 | predicted |
| CID442658   | CYP3A4  | predicted |
| CID442658   | MAPT    | predicted |
| CID442658   | LMNA    | predicted |
| CID442658   | CYP19A1 | predicted |
| CID442658   | RAB9A   | predicted |
| CID442658   | TDP1    | predicted |
| CID442658   | IL2     | predicted |
| CID442658   | NPC1    | predicted |
| CID442658   | AKR1B1  | predicted |
| CID442658   | APEX1   | predicted |
| CID442658   | SMN1    | predicted |
| CID442658   | POLB    | predicted |
| CID442658   | ABCG2   | predicted |
| CID442658   | BACE1   | predicted |

|              |          |           |
|--------------|----------|-----------|
| CID442658    | PTPN1    | predicted |
| CID442658    | L3MBTL1  | predicted |
| CID442658    | TSHR     | predicted |
| CID442658    | HSP90AA1 | predicted |
| CID442658    | ACHE     | predicted |
| CID442658    | MAPK1    | predicted |
| CID46893290  | CYP19A1  | predicted |
| CID46893290  | CYP3A4   | predicted |
| CID46893290  | MAPT     | predicted |
| CID46893290  | ABCG2    | predicted |
| CID46893290  | BACE1    | predicted |
| CID46893290  | RAB9A    | predicted |
| CID46893290  | TDP1     | predicted |
| CID46893290  | LMNA     | predicted |
| CID46893290  | KDM4E    | predicted |
| CID46893290  | NPC1     | predicted |
| CID46893290  | MAPK1    | predicted |
| CID46893290  | MAOA     | predicted |
| CID46893290  | ALDH1A1  | predicted |
| CID46893290  | KMT2A    | predicted |
| CID46893290  | ESR1     | predicted |
| CID46893290  | ACHE     | predicted |
| CID46893290  | ESR2     | predicted |
| CID46893290  | CYP2C19  | predicted |
| CID46893290  | PPARG    | predicted |
| CID46893290  | POLB     | predicted |
| CID129829821 | CYP19A1  | predicted |
| CID129829821 | MAPT     | predicted |
| CID129829821 | CYP3A4   | predicted |
| CID129829821 | ABCG2    | predicted |
| CID129829821 | MAOA     | predicted |
| CID129829821 | BACE1    | predicted |
| CID129829821 | LMNA     | predicted |
| CID129829821 | MAPK1    | predicted |
| CID129829821 | RAB9A    | predicted |
| CID129829821 | ACHE     | predicted |
| CID129829821 | NPC1     | predicted |
| CID129829821 | PTPN1    | predicted |
| CID129829821 | KMT2A    | predicted |
| CID129829821 | ALDH1A1  | predicted |
| CID129829821 | TDP1     | predicted |
| CID129829821 | CYP2C19  | predicted |
| CID129829821 | ESR1     | predicted |
| CID129829821 | KDM4E    | predicted |
| CID129829821 | TSHR     | predicted |
| CID129829821 | MAOB     | predicted |
| CID156992    | MAPT     | predicted |
| CID156992    | CYP3A4   | predicted |
| CID156992    | ABCG2    | predicted |
| CID156992    | MAOA     | predicted |
| CID156992    | BACE1    | predicted |
| CID156992    | ALDH1A1  | predicted |
| CID156992    | RAB9A    | predicted |
| CID156992    | CYP19A1  | predicted |
| CID156992    | NPC1     | predicted |
| CID156992    | TP53     | predicted |
| CID156992    | HPGD     | predicted |
| CID156992    | MAPK1    | predicted |

|              |         |           |
|--------------|---------|-----------|
| CID156992    | LMNA    | predicted |
| CID156992    | KMT2A   | predicted |
| CID156992    | TDP1    | predicted |
| CID156992    | TSHR    | predicted |
| CID156992    | KDM4E   | predicted |
| CID156992    | ABCB1   | predicted |
| CID156992    | CA12    | predicted |
| CID156992    | CYP2C19 | predicted |
| CID11662629  | MAPT    | predicted |
| CID11662629  | CYP3A4  | predicted |
| CID11662629  | CYP19A1 | predicted |
| CID11662629  | ABCG2   | predicted |
| CID11662629  | RAB9A   | predicted |
| CID11662629  | LMNA    | predicted |
| CID11662629  | TDP1    | predicted |
| CID11662629  | NPC1    | predicted |
| CID11662629  | BACE1   | predicted |
| CID11662629  | MAOA    | predicted |
| CID11662629  | AKR1B1  | predicted |
| CID11662629  | MAOB    | predicted |
| CID11662629  | SMN1    | predicted |
| CID11662629  | ALDH1A1 | predicted |
| CID11662629  | KDM4E   | predicted |
| CID11662629  | TSHR    | predicted |
| CID11662629  | POLB    | predicted |
| CID11662629  | IL2     | predicted |
| CID11662629  | KMT2A   | predicted |
| CID11662629  | MAPK1   | predicted |
| CID11655573  | MAPT    | predicted |
| CID11655573  | CYP3A4  | predicted |
| CID11655573  | ABCG2   | predicted |
| CID11655573  | LMNA    | predicted |
| CID11655573  | RAB9A   | predicted |
| CID11655573  | NPC1    | predicted |
| CID11655573  | TDP1    | predicted |
| CID11655573  | BACE1   | predicted |
| CID11655573  | CYP19A1 | predicted |
| CID11655573  | AKR1B1  | predicted |
| CID11655573  | TSHR    | predicted |
| CID11655573  | SMN1    | predicted |
| CID11655573  | ALDH1A1 | predicted |
| CID11655573  | MAOA    | predicted |
| CID11655573  | GAA     | predicted |
| CID11655573  | MAPK1   | predicted |
| CID11655573  | POLB    | predicted |
| CID11655573  | KDM4E   | predicted |
| CID11655573  | KMT2A   | predicted |
| CID11655573  | TP53    | predicted |
| CID102445446 | CYP3A4  | predicted |
| CID102445446 | MAPT    | predicted |
| CID102445446 | ABCG2   | predicted |
| CID102445446 | RAB9A   | predicted |
| CID102445446 | LMNA    | predicted |
| CID102445446 | TDP1    | predicted |
| CID102445446 | NPC1    | predicted |
| CID102445446 | CYP19A1 | predicted |
| CID102445446 | BACE1   | predicted |
| CID102445446 | AKR1B1  | predicted |

|              |          |           |
|--------------|----------|-----------|
| CID102445446 | SMN1     | predicted |
| CID102445446 | KDM4E    | predicted |
| CID102445446 | POLB     | predicted |
| CID102445446 | ALDH1A1  | predicted |
| CID102445446 | IL2      | predicted |
| CID102445446 | KMT2A    | predicted |
| CID102445446 | APEX1    | predicted |
| CID102445446 | MAPK1    | predicted |
| CID102445446 | MAOA     | predicted |
| CID102445446 | L3MBTL1  | predicted |
| CID5488686   | CYP3A4   | predicted |
| CID5488686   | LMNA     | predicted |
| CID5488686   | MAPT     | predicted |
| CID5488686   | RAB9A    | predicted |
| CID5488686   | TDP1     | predicted |
| CID5488686   | IL2      | predicted |
| CID5488686   | NPC1     | predicted |
| CID5488686   | TSHR     | predicted |
| CID5488686   | AKR1B1   | predicted |
| CID5488686   | SMN1     | predicted |
| CID5488686   | ABCG2    | predicted |
| CID5488686   | BACE1    | predicted |
| CID5488686   | ALDH1A1  | predicted |
| CID5488686   | POLB     | predicted |
| CID5488686   | L3MBTL1  | predicted |
| CID5488686   | KDM4E    | predicted |
| CID5488686   | CYP19A1  | predicted |
| CID5488686   | HSP90AA1 | predicted |
| CID5488686   | APEX1    | predicted |
| CID5488686   | CA9      | predicted |
| CID44258628  | MAPT     | predicted |
| CID44258628  | CYP3A4   | predicted |
| CID44258628  | ABCG2    | predicted |
| CID44258628  | CYP19A1  | predicted |
| CID44258628  | MAOA     | predicted |
| CID44258628  | BACE1    | predicted |
| CID44258628  | RAB9A    | predicted |
| CID44258628  | ALDH1A1  | predicted |
| CID44258628  | KMT2A    | predicted |
| CID44258628  | NPC1     | predicted |
| CID44258628  | TDP1     | predicted |
| CID44258628  | ABCB1    | predicted |
| CID44258628  | KDM4E    | predicted |
| CID44258628  | MAPK1    | predicted |
| CID44258628  | ODC1     | predicted |
| CID44258628  | TP53     | predicted |
| CID44258628  | CTSV     | predicted |
| CID44258628  | LMNA     | predicted |
| CID44258628  | ACHE     | predicted |
| CID44258628  | CYP2C19  | predicted |
| CID14135324  | CYP19A1  | predicted |
| CID14135324  | MAPT     | predicted |
| CID14135324  | CYP3A4   | predicted |
| CID14135324  | LMNA     | predicted |
| CID14135324  | ABCG2    | predicted |
| CID14135324  | TDP1     | predicted |
| CID14135324  | BACE1    | predicted |
| CID14135324  | RAB9A    | predicted |

|              |         |           |
|--------------|---------|-----------|
| CID14135324  | SMN1    | predicted |
| CID14135324  | NPC1    | predicted |
| CID14135324  | POLB    | predicted |
| CID14135324  | KDM4E   | predicted |
| CID14135324  | PTPN1   | predicted |
| CID14135324  | TSHR    | predicted |
| CID14135324  | MAPK1   | predicted |
| CID14135324  | AKR1B1  | predicted |
| CID14135324  | APEX1   | predicted |
| CID14135324  | KMT2A   | predicted |
| CID14135324  | GAA     | predicted |
| CID14135324  | ALDH1A1 | predicted |
| CID44259518  | MAPT    | predicted |
| CID44259518  | CYP3A4  | predicted |
| CID44259518  | ABCG2   | predicted |
| CID44259518  | ALDH1A1 | predicted |
| CID44259518  | LMNA    | predicted |
| CID44259518  | MAOA    | predicted |
| CID44259518  | CYP19A1 | predicted |
| CID44259518  | TDP1    | predicted |
| CID44259518  | RAB9A   | predicted |
| CID44259518  | NPC1    | predicted |
| CID44259518  | KDM4E   | predicted |
| CID44259518  | TP53    | predicted |
| CID44259518  | CA9     | predicted |
| CID44259518  | ABCB1   | predicted |
| CID44259518  | BACE1   | predicted |
| CID44259518  | KMT2A   | predicted |
| CID44259518  | CA12    | predicted |
| CID44259518  | MAPK1   | predicted |
| CID44259518  | TSHR    | predicted |
| CID44259518  | ACHE    | predicted |
| CID141457867 | CYP3A4  | predicted |
| CID141457867 | MAPT    | predicted |
| CID141457867 | ABCG2   | predicted |
| CID141457867 | CYP19A1 | predicted |
| CID141457867 | MAOA    | predicted |
| CID141457867 | ABCB1   | predicted |
| CID141457867 | ALDH1A1 | predicted |
| CID141457867 | KMT2A   | predicted |
| CID141457867 | RAB9A   | predicted |
| CID141457867 | BACE1   | predicted |
| CID141457867 | NPC1    | predicted |
| CID141457867 | TDP1    | predicted |
| CID141457867 | KDM4E   | predicted |
| CID141457867 | MAPK1   | predicted |
| CID141457867 | CTSV    | predicted |
| CID141457867 | ODC1    | predicted |
| CID141457867 | ACHE    | predicted |
| CID141457867 | TP53    | predicted |
| CID141457867 | LMNA    | predicted |
| CID141457867 | CA9     | predicted |
| CID3016433   | TSHR    | predicted |
| CID3016433   | MPEG1   | predicted |
| CID3016433   | LMNA    | predicted |
| CID3016433   | FAAH    | predicted |
| CID3016433   | ALOX5   | predicted |
| CID3016433   | HMGCR   | predicted |



|             |          |           |
|-------------|----------|-----------|
| CID3016433  | PTPN1    | predicted |
| CID3016433  | ALDH1A1  | predicted |
| CID3016433  | MAPT     | predicted |
| CID3016433  | TRPV1    | predicted |
| CID3016433  | PPARG    | predicted |
| CID3016433  | CYP3A4   | predicted |
| CID3016433  | FABP3    | predicted |
| CID3016433  | TDP1     | predicted |
| CID3016433  | PPARA    | predicted |
| CID3016433  | FNTA     | predicted |
| CID3016433  | MAPK1    | predicted |
| CID3016433  | ACHE     | predicted |
| CID3016433  | RAB9A    | predicted |
| CID3016433  | CYP2A6   | predicted |
| CID25200626 | MAOB     | predicted |
| CID25200626 | CDK5     | predicted |
| CID25200626 | HTR2C    | predicted |
| CID25200626 | HTR2B    | predicted |
| CID25200626 | HTR3A    | predicted |
| CID25200626 | CDC25B   | predicted |
| CID25200626 | MAP2K1   | predicted |
| CID25200626 | HTR6     | predicted |
| CID25200626 | IDO1     | predicted |
| CID25200626 | HTR5A    | predicted |
| CID25200626 | HTR2A    | predicted |
| CID25200626 | DYRK1B   | predicted |
| CID25200626 | DYRK2    | predicted |
| CID25200626 | DYRK3    | predicted |
| CID25200626 | DYRK4    | predicted |
| CID25200626 | PIM3     | predicted |
| CID25200626 | SYK      | predicted |
| CID25200626 | ABCG2    | predicted |
| CID25200626 | KARS     | predicted |
| CID25200626 | NOX4     | predicted |
| CID25200626 | MAOA     | Known     |
| CID73829976 | CYP19A1  | predicted |
| CID73829976 | CYP3A4   | predicted |
| CID73829976 | MAPT     | predicted |
| CID73829976 | LMNA     | predicted |
| CID73829976 | ABCG2    | predicted |
| CID73829976 | RAB9A    | predicted |
| CID73829976 | NPC1     | predicted |
| CID73829976 | TDP1     | predicted |
| CID73829976 | BACE1    | predicted |
| CID73829976 | SMN1     | predicted |
| CID73829976 | AKR1B1   | predicted |
| CID73829976 | POLB     | predicted |
| CID73829976 | KMT2A    | predicted |
| CID73829976 | APEX1    | predicted |
| CID73829976 | IL2      | predicted |
| CID73829976 | PTPN1    | predicted |
| CID73829976 | TSHR     | predicted |
| CID73829976 | ALDH1A1  | predicted |
| CID73829976 | L3MBTL1  | predicted |
| CID73829976 | MAPK1    | predicted |
| CID5314067  | TNFRSF1A | predicted |
| CID5314067  | MAPT     | predicted |
| CID5314067  | ABCG2    | predicted |

|            |         |           |
|------------|---------|-----------|
| CID5314067 | CYP3A4  | predicted |
| CID5314067 | CYP1A1  | predicted |
| CID5314067 | RAB9A   | predicted |
| CID5314067 | NPC1    | predicted |
| CID5314067 | CYP1B1  | predicted |
| CID5314067 | KMT2A   | predicted |
| CID5314067 | CA9     | predicted |
| CID5314067 | CYP1A2  | predicted |
| CID5314067 | ALDH1A1 | predicted |
| CID5314067 | CA12    | predicted |
| CID5314067 | CYP19A1 | predicted |
| CID5314067 | MAOA    | predicted |
| CID5314067 | CA7     | predicted |
| CID5314067 | CA1     | predicted |
| CID5314067 | TP53    | predicted |
| CID5314067 | PDE4D   | predicted |
| CID5314067 | LMNA    | predicted |
| CID3085061 | TYR     | predicted |
| CID3085061 | CYP1A2  | predicted |
| CID3085061 | CYP2A6  | predicted |
| CID3085061 | MAPT    | predicted |
| CID3085061 | AKR1B1  | predicted |
| CID3085061 | CYP3A4  | predicted |
| CID3085061 | KMT2A   | predicted |
| CID3085061 | TSHR    | predicted |
| CID3085061 | ABCG2   | predicted |
| CID3085061 | LMNA    | predicted |
| CID3085061 | HPGD    | predicted |
| CID3085061 | RECQL   | predicted |
| CID3085061 | ALDH1A1 | predicted |
| CID3085061 | NPC1    | predicted |
| CID3085061 | TRPA1   | predicted |
| CID3085061 | CRHR1   | predicted |
| CID3085061 | MAOA    | predicted |
| CID3085061 | TDP1    | predicted |
| CID3085061 | PPARG   | predicted |
| CID3085061 | RAB9A   | predicted |
| CID5322075 | CYP19A1 | predicted |
| CID5322075 | MAPT    | predicted |
| CID5322075 | CYP3A4  | predicted |
| CID5322075 | ABCG2   | predicted |
| CID5322075 | MAOA    | predicted |
| CID5322075 | BACE1   | predicted |
| CID5322075 | LMNA    | predicted |
| CID5322075 | MAPK1   | predicted |
| CID5322075 | RAB9A   | predicted |
| CID5322075 | ACHE    | predicted |
| CID5322075 | NPC1    | predicted |
| CID5322075 | PTPN1   | predicted |
| CID5322075 | KMT2A   | predicted |
| CID5322075 | ALDH1A1 | predicted |
| CID5322075 | TDP1    | predicted |
| CID5322075 | CYP2C19 | predicted |
| CID5322075 | ESR1    | predicted |
| CID5322075 | KDM4E   | predicted |
| CID5322075 | TSHR    | predicted |
| CID5322075 | MAOB    | predicted |
| CID3308708 | MAPT    | predicted |

|             |         |           |
|-------------|---------|-----------|
| CID3308708  | CYP3A4  | predicted |
| CID3308708  | LMNA    | predicted |
| CID3308708  | ABCG2   | predicted |
| CID3308708  | TDP1    | predicted |
| CID3308708  | RAB9A   | predicted |
| CID3308708  | NPC1    | predicted |
| CID3308708  | SMN1    | predicted |
| CID3308708  | BACE1   | predicted |
| CID3308708  | TSHR    | predicted |
| CID3308708  | KDM4E   | predicted |
| CID3308708  | CYP19A1 | predicted |
| CID3308708  | AKR1B1  | predicted |
| CID3308708  | POLB    | predicted |
| CID3308708  | ALDH1A1 | predicted |
| CID3308708  | PTPN1   | predicted |
| CID3308708  | KMT2A   | predicted |
| CID3308708  | TP53    | predicted |
| CID3308708  | GAA     | predicted |
| CID3308708  | MAPK1   | predicted |
| CID11609345 | MAPT    | predicted |
| CID11609345 | CYP3A4  | predicted |
| CID11609345 | ABCG2   | predicted |
| CID11609345 | ALDH1A1 | predicted |
| CID11609345 | LMNA    | predicted |
| CID11609345 | BACE1   | predicted |
| CID11609345 | RAB9A   | predicted |
| CID11609345 | TSHR    | predicted |
| CID11609345 | TP53    | predicted |
| CID11609345 | CYP19A1 | predicted |
| CID11609345 | NPC1    | predicted |
| CID11609345 | CA9     | predicted |
| CID11609345 | MAOA    | predicted |
| CID11609345 | CA12    | predicted |
| CID11609345 | ABCB1   | predicted |
| CID11609345 | KDM4E   | predicted |
| CID11609345 | TDP1    | predicted |
| CID11609345 | KMT2A   | predicted |
| CID11609345 | CA1     | predicted |
| CID11609345 | MAPK1   | predicted |
| CID3084708  | CYP3A4  | predicted |
| CID3084708  | LMNA    | predicted |
| CID3084708  | MAPT    | predicted |
| CID3084708  | CYP2D6  | predicted |
| CID3084708  | ACHE    | predicted |
| CID3084708  | SMN1    | predicted |
| CID3084708  | CYP2C19 | predicted |
| CID3084708  | TSHR    | predicted |
| CID3084708  | ALDH1A1 | predicted |
| CID3084708  | RAB9A   | predicted |
| CID3084708  | DRD1    | predicted |
| CID3084708  | NPC1    | predicted |
| CID3084708  | TP53    | predicted |
| CID3084708  | ABCG2   | predicted |
| CID3084708  | TDP1    | predicted |
| CID3084708  | F3      | predicted |
| CID3084708  | KDM4E   | predicted |
| CID3084708  | ALOX5   | predicted |
| CID3084708  | KMT2A   | predicted |

|             |         |           |
|-------------|---------|-----------|
| CID3084708  | MAPK1   | predicted |
| CID10547386 | CYP3A4  | predicted |
| CID10547386 | MAPT    | predicted |
| CID10547386 | ACHE    | predicted |
| CID10547386 | LMNA    | predicted |
| CID10547386 | SMN1    | predicted |
| CID10547386 | DRD1    | predicted |
| CID10547386 | NPC1    | predicted |
| CID10547386 | F3      | predicted |
| CID10547386 | RAB9A   | predicted |
| CID10547386 | ABCG2   | predicted |
| CID10547386 | CYP2C19 | predicted |
| CID10547386 | TDP1    | predicted |
| CID10547386 | UBE2I   | predicted |
| CID10547386 | TP53    | predicted |
| CID10547386 | ALDH1A1 | predicted |
| CID10547386 | TSHR    | predicted |
| CID10547386 | KDM4E   | predicted |
| CID10547386 | CYP2D6  | predicted |
| CID10547386 | MAOA    | predicted |
| CID10547386 | MAPK1   | predicted |
| CID34458    | DRD4    | predicted |
| CID34458    | F3      | predicted |
| CID34458    | DRD3    | predicted |
| CID34458    | CASP9   | predicted |
| CID34458    | DRD5    | predicted |
| CID34458    | HTR1A   | predicted |
| CID34458    | HTR1D   | predicted |
| CID34458    | HTR4    | predicted |
| CID34458    | CYP2D6  | predicted |
| CID34458    | HTR2B   | predicted |
| CID34458    | HTR2A   | predicted |
| CID34458    | HTR7    | predicted |
| CID34458    | ADRA2C  | predicted |
| CID34458    | HTR3A   | predicted |
| CID34458    | HTR2C   | predicted |
| CID34458    | DOP2R   | predicted |
| CID34458    | ADRA2A  | predicted |
| CID34458    | ADRA1D  | predicted |
| CID34458    | ADRA2B  | predicted |
| CID34458    | HTR1B   | predicted |
| CID34458    | DRD1    | Known     |
| CID34458    | DRD2    | Known     |
| CID5245667  | MAOA    | predicted |
| CID5245667  | CYP3A4  | predicted |
| CID5245667  | MAPT    | predicted |
| CID5245667  | DRD1    | predicted |
| CID5245667  | F3      | predicted |
| CID5245667  | LMNA    | predicted |
| CID5245667  | PARP1   | predicted |
| CID5245667  | SMN1    | predicted |
| CID5245667  | CYP2C19 | predicted |
| CID5245667  | CYP2D6  | predicted |
| CID5245667  | ACHE    | predicted |
| CID5245667  | KMT2A   | predicted |
| CID5245667  | DRD2    | predicted |
| CID5245667  | TDP1    | predicted |
| CID5245667  | ALDH1A1 | predicted |

|             |         |           |
|-------------|---------|-----------|
| CID5245667  | RAB9A   | predicted |
| CID5245667  | MAPK1   | predicted |
| CID5245667  | NPC1    | predicted |
| CID5245667  | KDM4E   | predicted |
| CID5245667  | CYP19A1 | predicted |
| CID107152   | LMNA    | predicted |
| CID107152   | PTPN1   | predicted |
| CID107152   | TSHR    | predicted |
| CID107152   | MAPT    | predicted |
| CID107152   | CYP3A4  | predicted |
| CID107152   | GPBAR1  | predicted |
| CID107152   | RAB9A   | predicted |
| CID107152   | CYP19A1 | predicted |
| CID107152   | ALDH1A1 | predicted |
| CID107152   | HSD11B1 | predicted |
| CID107152   | ALOX15  | predicted |
| CID107152   | ACHE    | predicted |
| CID107152   | TDP1    | predicted |
| CID107152   | KMT2A   | predicted |
| CID107152   | XBP1    | predicted |
| CID107152   | ALOX5   | predicted |
| CID107152   | NPC1    | predicted |
| CID107152   | SMN1    | predicted |
| CID107152   | TP53    | predicted |
| CID107152   | NR1H3   | predicted |
| CID5319969  | FNTB    | predicted |
| CID5319969  | FNTA    | predicted |
| CID5319969  | NT5E    | predicted |
| CID5319969  | TSHR    | predicted |
| CID5319969  | LMNA    | predicted |
| CID5319969  | PTPN1   | predicted |
| CID5319969  | TDP1    | predicted |
| CID5319969  | ECE1    | predicted |
| CID5319969  | CYP3A4  | predicted |
| CID5319969  | MAPT    | predicted |
| CID5319969  | ALDH1A1 | predicted |
| CID5319969  | SMN1    | predicted |
| CID5319969  | CA1     | predicted |
| CID5319969  | CYP19A1 | predicted |
| CID5319969  | CA9     | predicted |
| CID5319969  | ALOX15  | predicted |
| CID5319969  | RAB9A   | predicted |
| CID5319969  | TRPA1   | predicted |
| CID5319969  | NPC1    | predicted |
| CID5319969  | CA12    | predicted |
| CID90471896 | LMNA    | predicted |
| CID90471896 | CYP3A4  | predicted |
| CID90471896 | MAPT    | predicted |
| CID90471896 | TSHR    | predicted |
| CID90471896 | SMN1    | predicted |
| CID90471896 | ALDH1A1 | predicted |
| CID90471896 | TDP1    | predicted |
| CID90471896 | PTPN1   | predicted |
| CID90471896 | KMT2A   | predicted |
| CID90471896 | RAB9A   | predicted |
| CID90471896 | CYP19A1 | predicted |
| CID90471896 | TP53    | predicted |
| CID90471896 | NPC1    | predicted |

|             |         |           |
|-------------|---------|-----------|
| CID90471896 | NFKB1   | predicted |
| CID90471896 | CA9     | predicted |
| CID90471896 | CA1     | predicted |
| CID90471896 | PPARG   | predicted |
| CID90471896 | HTT     | predicted |
| CID90471896 | KDM4E   | predicted |
| CID90471896 | ACHE    | predicted |
| CID4053302  | CYP19A1 | predicted |
| CID4053302  | MAPT    | predicted |
| CID4053302  | ABCG2   | predicted |
| CID4053302  | CYP3A4  | predicted |
| CID4053302  | LMNA    | predicted |
| CID4053302  | BACE1   | predicted |
| CID4053302  | RAB9A   | predicted |
| CID4053302  | MAOA    | predicted |
| CID4053302  | NPC1    | predicted |
| CID4053302  | MAPK1   | predicted |
| CID4053302  | ACHE    | predicted |
| CID4053302  | CYP2C19 | predicted |
| CID4053302  | TSHR    | predicted |
| CID4053302  | ALDH1A1 | predicted |
| CID4053302  | PTPN1   | predicted |
| CID4053302  | KMT2A   | predicted |
| CID4053302  | MAOB    | predicted |
| CID4053302  | TDP1    | predicted |
| CID4053302  | KDM4E   | predicted |
| CID4053302  | ESR1    | predicted |
| CID5316763  | MAPT    | predicted |
| CID5316763  | CYP3A4  | predicted |
| CID5316763  | ABCG2   | predicted |
| CID5316763  | NPC1    | predicted |
| CID5316763  | RAB9A   | predicted |
| CID5316763  | MAOA    | predicted |
| CID5316763  | ALDH1A1 | predicted |
| CID5316763  | TDP1    | predicted |
| CID5316763  | CYP19A1 | predicted |
| CID5316763  | LMNA    | predicted |
| CID5316763  | TP53    | predicted |
| CID5316763  | MAPK1   | predicted |
| CID5316763  | KDM4E   | predicted |
| CID5316763  | KMT2A   | predicted |
| CID5316763  | ACHE    | predicted |
| CID5316763  | SMN1    | predicted |
| CID5316763  | CYP2C19 | predicted |
| CID5316763  | PTPN1   | predicted |
| CID5316763  | TSHR    | predicted |
| CID5316763  | BACE1   | predicted |
| CID25203524 | GSTA1   | predicted |
| CID25203524 | XDH     | predicted |
| CID25203524 | ABCB1   | predicted |
| CID25203524 | PLIN5   | predicted |
| CID25203524 | RECQL   | predicted |
| CID25203524 | BCR     | predicted |
| CID25203524 | HSD17B1 | predicted |
| CID25203524 | PLIN1   | predicted |
| CID25203524 | CYP3A4  | predicted |
| CID25203524 | TDP1    | predicted |
| CID25203524 | CYP2C9  | predicted |

|             |          |           |
|-------------|----------|-----------|
| CID25203524 | AR       | predicted |
| CID25203524 | MAPK10   | predicted |
| CID25203524 | CYP19A1  | predicted |
| CID25203524 | NR3C1    | predicted |
| CID25203524 | CBR1     | predicted |
| CID25203524 | CYP2C19  | predicted |
| CID25203524 | ABL1     | predicted |
| CID25203524 | PRKDC    | predicted |
| CID25203524 | NOX4     | predicted |
| CID25203524 | CYP1A2   | Known     |
| CID25203524 | CYP1A1   | Known     |
| CID25203524 | CYP1B1   | Known     |
| CID25203524 | GSTP1    | Known     |
| CID25203524 | ABCC1    | Known     |
| CID69423    | TSHR     | predicted |
| CID69423    | MPEG1    | predicted |
| CID69423    | HMGCR    | predicted |
| CID69423    | LMNA     | predicted |
| CID69423    | FAAH     | predicted |
| CID69423    | ALOX5    | predicted |
| CID69423    | TRPV1    | predicted |
| CID69423    | TRPA1    | predicted |
| CID69423    | PPARG    | predicted |
| CID69423    | FABP3    | predicted |
| CID69423    | PPARA    | predicted |
| CID69423    | MAPT     | predicted |
| CID69423    | PPARD    | predicted |
| CID69423    | CNR1     | predicted |
| CID69423    | NPSR1    | predicted |
| CID69423    | CNR2     | predicted |
| CID69423    | PTPN1    | predicted |
| CID69423    | CYP3A4   | predicted |
| CID69423    | FNTA     | predicted |
| CID69423    | ALDH1A1  | predicted |
| CID10212    | MAPT     | predicted |
| CID10212    | CYP2C19  | predicted |
| CID10212    | HPGD     | predicted |
| CID10212    | MAPK1    | predicted |
| CID10212    | CYP2C9   | predicted |
| CID10212    | CYP2D6   | predicted |
| CID10212    | SMN1     | predicted |
| CID10212    | HSD17B10 | predicted |
| CID10212    | TP53     | predicted |
| CID10212    | ALDH1A1  | predicted |
| CID10212    | LMNA     | predicted |
| CID10212    | KDM4E    | predicted |
| CID10212    | ALOX15   | predicted |
| CID10212    | TSHR     | predicted |
| CID10212    | NFKB1    | predicted |
| CID10212    | THPO     | predicted |
| CID10212    | CYP1A1   | predicted |
| CID10212    | AR       | predicted |
| CID10212    | CYP1A2   | predicted |
| CID10212    | HIF1A    | predicted |
| CID10212    | CYP3A4   | Known     |
| CID493376   | ABCG2    | predicted |
| CID493376   | CYP1A1   | predicted |
| CID493376   | CYP1A2   | predicted |

|            |         |           |
|------------|---------|-----------|
| CID493376  | CYP1B1  | predicted |
| CID493376  | TPPP    | predicted |
| CID493376  | BCR     | predicted |
| CID493376  | TUBB3   | predicted |
| CID493376  | RBBP9   | predicted |
| CID493376  | TUBB1   | predicted |
| CID493376  | CYP2C9  | predicted |
| CID493376  | XDH     | predicted |
| CID493376  | THRB    | predicted |
| CID493376  | CYP3A4  | predicted |
| CID493376  | ABL1    | predicted |
| CID493376  | CYP2C19 | predicted |
| CID493376  | TUBB2B  | predicted |
| CID493376  | MAPT    | predicted |
| CID493376  | KMT2A   | predicted |
| CID493376  | CA9     | predicted |
| CID493376  | CA12    | predicted |
| CID493376  | ABCB1   | Known     |
| CID4484951 | CYP19A1 | predicted |
| CID4484951 | MAPT    | predicted |
| CID4484951 | CYP3A4  | predicted |
| CID4484951 | RAB9A   | predicted |
| CID4484951 | LMNA    | predicted |
| CID4484951 | NPC1    | predicted |
| CID4484951 | ABCG2   | predicted |
| CID4484951 | TDP1    | predicted |
| CID4484951 | BACE1   | predicted |
| CID4484951 | IL2     | predicted |
| CID4484951 | AKR1B1  | predicted |
| CID4484951 | POLB    | predicted |
| CID4484951 | SMN1    | predicted |
| CID4484951 | ALDH1A1 | predicted |
| CID4484951 | KMT2A   | predicted |
| CID4484951 | APEX1   | predicted |
| CID4484951 | PTPN1   | predicted |
| CID4484951 | L3MBTL1 | predicted |
| CID4484951 | TSHR    | predicted |
| CID4484951 | MAPK1   | predicted |
| CID5316132 | MAPT    | predicted |
| CID5316132 | LMNA    | predicted |
| CID5316132 | CYP3A4  | predicted |
| CID5316132 | TSHR    | predicted |
| CID5316132 | ALDH1A1 | predicted |
| CID5316132 | TDP1    | predicted |
| CID5316132 | CA9     | predicted |
| CID5316132 | CA1     | predicted |
| CID5316132 | SMN1    | predicted |
| CID5316132 | KMT2A   | predicted |
| CID5316132 | RAB9A   | predicted |
| CID5316132 | TP53    | predicted |
| CID5316132 | PTPN1   | predicted |
| CID5316132 | ABCG2   | predicted |
| CID5316132 | CA12    | predicted |
| CID5316132 | NPC1    | predicted |
| CID5316132 | CYP19A1 | predicted |
| CID5316132 | PPARG   | predicted |
| CID5316132 | CA2     | predicted |
| CID5316132 | KDM4E   | predicted |



|            |          |           |
|------------|----------|-----------|
| CID6370943 | CYP3A4   | predicted |
| CID6370943 | LMNA     | predicted |
| CID6370943 | MAPT     | predicted |
| CID6370943 | SMN1     | predicted |
| CID6370943 | TDP1     | predicted |
| CID6370943 | RAB9A    | predicted |
| CID6370943 | AKR1B1   | predicted |
| CID6370943 | TSHR     | predicted |
| CID6370943 | HSP90AA1 | predicted |
| CID6370943 | IL2      | predicted |
| CID6370943 | NPC1     | predicted |
| CID6370943 | L3MBTL1  | predicted |
| CID6370943 | POLB     | predicted |
| CID6370943 | ALDH1A1  | predicted |
| CID6370943 | KMT2A    | predicted |
| CID6370943 | PTPN1    | predicted |
| CID6370943 | CA9      | predicted |
| CID6370943 | TP53     | predicted |
| CID6370943 | APEX1    | predicted |
| CID6370943 | PRKCA    | predicted |
| CID5280443 | PARP1    | predicted |
| CID5280443 | PTP4A3   | predicted |
| CID5280443 | RAB9A    | predicted |
| CID5280443 | LMNA     | predicted |
| CID5280443 | KDM4E    | predicted |
| CID5280443 | ALOX12   | predicted |
| CID5280443 | RECQL    | predicted |
| CID5280443 | LCK      | predicted |
| CID5280443 | MAPK1    | predicted |
| CID5280443 | CBR1     | predicted |
| CID5280443 | ALOX5    | predicted |
| CID5280443 | MAPK14   | predicted |
| CID5280443 | PLG      | predicted |
| CID5280443 | CCND1    | predicted |
| CID5280443 | POLB     | predicted |
| CID5280443 | SMN1     | predicted |
| CID5280443 | CYP2D6   | predicted |
| CID5280443 | BLM      | predicted |
| CID5280443 | CDK5R1   | predicted |
| CID5280443 | NFKB1    | predicted |
| CID5280443 | CYP1A2   | Known     |
| CID5280443 | CYP1A1   | Known     |
| CID5280443 | TNKS     | Known     |
| CID5280443 | CYP1B1   | Known     |
| CID5280443 | AR       | Known     |
| CID5280443 | NOX4     | Known     |
| CID5280443 | MAOA     | Known     |
| CID5280443 | TNKS2    | Known     |
| CID5280443 | MAPK10   | Known     |
| CID5280443 | NR3C1    | Known     |
| CID5280443 | ESR2     | Known     |
| CID5280443 | ESR1     | Known     |
| CID5280443 | ABCC1    | Known     |
| CID5280443 | CYP3A4   | Known     |
| CID5280443 | XDH      | Known     |
| CID5280443 | CDK5     | Known     |
| CID5280443 | ABCG2    | Known     |
| CID5280443 | CYP2C9   | Known     |

|            |          |           |
|------------|----------|-----------|
| CID5280443 | CYP2C19  | Known     |
| CID5280443 | PIM1     | Known     |
| CID5280443 | HPGD     | Known     |
| CID5280443 | TP53     | Known     |
| CID5280443 | CDK6     | Known     |
| CID5280443 | OPRK1    | Known     |
| CID5280443 | MAPT     | Known     |
| CID5280443 | HSD17B10 | Known     |
| CID5280443 | SYK      | Known     |
| CID5280443 | OPRD1    | Known     |
| CID5280443 | ALOX15   | Known     |
| CID5280443 | ALDH1A1  | Known     |
| CID5280443 | KARS     | Known     |
| CID5280443 | CYP19A1  | Known     |
| CID5280443 | CSNK2B   | Known     |
| CID5280443 | HIF1A    | Known     |
| CID5280443 | HSD17B1  | Known     |
| CID5280443 | ABCB1    | Known     |
| CID5280443 | OPRM1    | Known     |
| CID5280443 | GSK3B    | Known     |
| CID5280443 | TDP1     | Known     |
| CID5280443 | NPC1     | Known     |
| CID5280443 | FLT3     | Known     |
| CID5280443 | TSHR     | Known     |
| CID5280443 | PTGS2    | Known     |
| CID5280443 | KMT2A    | Known     |
| CID5280443 | PKM      | Known     |
| CID5280443 | ACHE     | Known     |
| CID5280443 | THPO     | Known     |
| CID5280443 | CFTR     | Known     |
| CID5280443 | CSNK2A1  | Known     |
| CID5280443 | USP2     | Known     |
| CID8468    | LMNA     | predicted |
| CID8468    | JAK2     | predicted |
| CID8468    | S1PR1    | predicted |
| CID8468    | HIF1A    | predicted |
| CID8468    | KCNN3    | predicted |
| CID8468    | KMT2A    | predicted |
| CID8468    | CREBBP   | predicted |
| CID8468    | MDM2     | predicted |
| CID8468    | SMN1     | predicted |
| CID8468    | TSHR     | predicted |
| CID8468    | NPSR1    | predicted |
| CID8468    | RAB9A    | predicted |
| CID8468    | NPC1     | predicted |
| CID8468    | PRNP     | predicted |
| CID8468    | PMP22    | predicted |
| CID8468    | HSD17B10 | predicted |
| CID8468    | THPO     | predicted |
| CID8468    | MAPT     | predicted |
| CID8468    | XBP1     | predicted |
| CID8468    | BARD1    | predicted |
| CID8468    | HTT      | Known     |
| CID10742   | CA4      | predicted |
| CID10742   | CA5B     | predicted |
| CID10742   | CA13     | predicted |
| CID10742   | HSD17B10 | predicted |
| CID10742   | MB       | predicted |

|           |          |           |
|-----------|----------|-----------|
| CID10742  | GLA      | predicted |
| CID10742  | LMNA     | predicted |
| CID10742  | TDP1     | predicted |
| CID10742  | SERPINE1 | predicted |
| CID10742  | CASP2    | predicted |
| CID10742  | HPGD     | predicted |
| CID10742  | MAPT     | predicted |
| CID10742  | ESR2     | predicted |
| CID10742  | CYP3A4   | predicted |
| CID10742  | F2       | predicted |
| CID10742  | HSD17B3  | predicted |
| CID10742  | ALDH1A1  | predicted |
| CID10742  | GAA      | predicted |
| CID10742  | HRH4     | predicted |
| CID10742  | KMT2A    | predicted |
| CID10742  | CA12     | Known     |
| CID10742  | CA1      | Known     |
| CID10742  | CA9      | Known     |
| CID10742  | CA7      | Known     |
| CID10742  | CA2      | Known     |
| CID10742  | CA14     | Known     |
| CID10742  | CA6      | Known     |
| CID10742  | CA5A     | Known     |
| CID10742  | CA3      | Known     |
| CID689043 | CA4      | predicted |
| CID689043 | CA13     | predicted |
| CID689043 | MMP12    | predicted |
| CID689043 | CYP3A4   | predicted |
| CID689043 | ALDH1A1  | predicted |
| CID689043 | RECQL    | predicted |
| CID689043 | ALOX15   | predicted |
| CID689043 | HPGD     | predicted |
| CID689043 | TSHR     | predicted |
| CID689043 | POLB     | predicted |
| CID689043 | APEX1    | predicted |
| CID689043 | TP53     | predicted |
| CID689043 | THPO     | predicted |
| CID689043 | HIF1A    | predicted |
| CID689043 | GLA      | predicted |
| CID689043 | HCAR2    | predicted |
| CID689043 | BLM      | predicted |
| CID689043 | RAB9A    | predicted |
| CID689043 | L3MBTL1  | predicted |
| CID689043 | SMN1     | predicted |
| CID689043 | CA12     | Known     |
| CID689043 | CA1      | Known     |
| CID689043 | CA9      | Known     |
| CID689043 | CA2      | Known     |
| CID689043 | CA7      | Known     |
| CID689043 | CA14     | Known     |
| CID689043 | CA5A     | Known     |
| CID689043 | CA5B     | Known     |
| CID689043 | CA6      | Known     |
| CID689043 | CA3      | Known     |
| CID689043 | MMP1     | Known     |
| CID689043 | MMP2     | Known     |
| CID689043 | MMP9     | Known     |
| CID689043 | HSD17B10 | Known     |

|             |          |           |
|-------------|----------|-----------|
| CID689043   | MAPK1    | Known     |
| CID689043   | TDP1     | Known     |
| CID689043   | MAPT     | Known     |
| CID689043   | KDM4E    | Known     |
| CID689043   | GAA      | Known     |
| CID689043   | NFKB1    | Known     |
| CID689043   | KMT2A    | Known     |
| CID689043   | LMNA     | Known     |
| CID689043   | PTPN1    | Known     |
| CID25200950 | PARP1    | predicted |
| CID25200950 | PTP4A3   | predicted |
| CID25200950 | RAB9A    | predicted |
| CID25200950 | LMNA     | predicted |
| CID25200950 | KDM4E    | predicted |
| CID25200950 | ALOX12   | predicted |
| CID25200950 | RECQL    | predicted |
| CID25200950 | LCK      | predicted |
| CID25200950 | MAPK1    | predicted |
| CID25200950 | CBR1     | predicted |
| CID25200950 | ALOX5    | predicted |
| CID25200950 | MAPK14   | predicted |
| CID25200950 | PLG      | predicted |
| CID25200950 | CCND1    | predicted |
| CID25200950 | POLB     | predicted |
| CID25200950 | SMN1     | predicted |
| CID25200950 | CYP2D6   | predicted |
| CID25200950 | BLM      | predicted |
| CID25200950 | CDK5R1   | predicted |
| CID25200950 | NFKB1    | predicted |
| CID25200950 | CYP1A2   | Known     |
| CID25200950 | CYP1A1   | Known     |
| CID25200950 | TNKS     | Known     |
| CID25200950 | CYP1B1   | Known     |
| CID25200950 | AR       | Known     |
| CID25200950 | NOX4     | Known     |
| CID25200950 | MAOA     | Known     |
| CID25200950 | TNKS2    | Known     |
| CID25200950 | MAPK10   | Known     |
| CID25200950 | NR3C1    | Known     |
| CID25200950 | ESR2     | Known     |
| CID25200950 | ESR1     | Known     |
| CID25200950 | ABCC1    | Known     |
| CID25200950 | CYP3A4   | Known     |
| CID25200950 | XDH      | Known     |
| CID25200950 | CDK5     | Known     |
| CID25200950 | ABCG2    | Known     |
| CID25200950 | CYP2C9   | Known     |
| CID25200950 | CYP2C19  | Known     |
| CID25200950 | PIM1     | Known     |
| CID25200950 | HPGD     | Known     |
| CID25200950 | TP53     | Known     |
| CID25200950 | CDK6     | Known     |
| CID25200950 | OPRK1    | Known     |
| CID25200950 | MAPT     | Known     |
| CID25200950 | HSD17B10 | Known     |
| CID25200950 | SYK      | Known     |
| CID25200950 | OPRD1    | Known     |
| CID25200950 | ALOX15   | Known     |

|             |          |           |
|-------------|----------|-----------|
| CID25200950 | ALDH1A1  | Known     |
| CID25200950 | KARS     | Known     |
| CID25200950 | CYP19A1  | Known     |
| CID25200950 | CSNK2B   | Known     |
| CID25200950 | HIF1A    | Known     |
| CID25200950 | HSD17B1  | Known     |
| CID25200950 | ABCB1    | Known     |
| CID25200950 | OPRM1    | Known     |
| CID25200950 | GSK3B    | Known     |
| CID25200950 | TDP1     | Known     |
| CID25200950 | NPC1     | Known     |
| CID25200950 | FLT3     | Known     |
| CID25200950 | TSHR     | Known     |
| CID25200950 | PTGS2    | Known     |
| CID25200950 | KMT2A    | Known     |
| CID25200950 | PKM      | Known     |
| CID25200950 | ACHE     | Known     |
| CID25200950 | THPO     | Known     |
| CID25200950 | CFTR     | Known     |
| CID25200950 | CSNK2A1  | Known     |
| CID25200950 | USP2     | Known     |
| CID453      | LMNA     | predicted |
| CID453      | TDP1     | predicted |
| CID453      | TSHR     | predicted |
| CID453      | MAPT     | predicted |
| CID453      | CYP3A4   | predicted |
| CID453      | SMN1     | predicted |
| CID453      | L3MBTL1  | predicted |
| CID453      | IL2      | predicted |
| CID453      | PTPN1    | predicted |
| CID453      | AKR1B1   | predicted |
| CID453      | RAB9A    | predicted |
| CID453      | THRB     | predicted |
| CID453      | NPC1     | predicted |
| CID453      | POLB     | predicted |
| CID453      | MAPK1    | predicted |
| CID453      | APEX1    | predicted |
| CID453      | KMT2A    | predicted |
| CID453      | ALDH1A1  | predicted |
| CID453      | HSP90AA1 | predicted |
| CID453      | CYP19A1  | predicted |
| CID1094     | LMNA     | predicted |
| CID1094     | PTPN1    | predicted |
| CID1094     | TSHR     | predicted |
| CID1094     | MAPT     | predicted |
| CID1094     | CYP3A4   | predicted |
| CID1094     | SMN1     | predicted |
| CID1094     | TDP1     | predicted |
| CID1094     | RAB9A    | predicted |
| CID1094     | AKR1B10  | predicted |
| CID1094     | CYP19A1  | predicted |
| CID1094     | KMT2A    | predicted |
| CID1094     | ALDH1A1  | predicted |
| CID1094     | PPARG    | predicted |
| CID1094     | TP53     | predicted |
| CID1094     | MAPK1    | predicted |
| CID1094     | GPBAR1   | predicted |
| CID1094     | HMGCR    | predicted |

|            |         |           |
|------------|---------|-----------|
| CID1094    | NPC1    | predicted |
| CID1094    | HSD11B1 | predicted |
| CID1094    | ACHE    | predicted |
| CID5318889 | CYP3A4  | predicted |
| CID5318889 | MAPT    | predicted |
| CID5318889 | CYP19A1 | predicted |
| CID5318889 | LMNA    | predicted |
| CID5318889 | BACE1   | predicted |
| CID5318889 | ABCG2   | predicted |
| CID5318889 | KDM4E   | predicted |
| CID5318889 | MAPK1   | predicted |
| CID5318889 | PTPN1   | predicted |
| CID5318889 | TDP1    | predicted |
| CID5318889 | SMN1    | predicted |
| CID5318889 | RAB9A   | predicted |
| CID5318889 | ALDH1A1 | predicted |
| CID5318889 | NPC1    | predicted |
| CID5318889 | ACHE    | predicted |
| CID5318889 | CYP2C19 | predicted |
| CID5318889 | ALOX15  | predicted |
| CID5318889 | KMT2A   | predicted |
| CID5318889 | CA9     | predicted |
| CID5318889 | CA12    | predicted |
| CID450     | PTPN1   | predicted |
| CID450     | LMNA    | predicted |
| CID450     | MAPT    | predicted |
| CID450     | CYP3A4  | predicted |
| CID450     | GPBAR1  | predicted |
| CID450     | SHBG    | predicted |
| CID450     | ESR1    | predicted |
| CID450     | CYP19A1 | predicted |
| CID450     | RAB9A   | predicted |
| CID450     | SMN1    | predicted |
| CID450     | TSHR    | predicted |
| CID450     | ESR2    | predicted |
| CID450     | TDP1    | predicted |
| CID450     | NPC1    | predicted |
| CID450     | MAPK1   | predicted |
| CID450     | ACHE    | predicted |
| CID450     | HSD11B1 | predicted |
| CID450     | KMT2A   | predicted |
| CID450     | OPRM1   | predicted |
| CID450     | BACE1   | predicted |
| CID6569    | TSHR    | predicted |
| CID6569    | ALDH1A1 | predicted |
| CID6569    | TRPA1   | predicted |
| CID6569    | LMNA    | predicted |
| CID6569    | CYP3A4  | predicted |
| CID6569    | MAPT    | predicted |
| CID6569    | KDM5C   | predicted |
| CID6569    | MAPK1   | predicted |
| CID6569    | CYP19A1 | predicted |
| CID6569    | ALOX5   | predicted |
| CID6569    | KDM2A   | predicted |
| CID6569    | PHF8    | predicted |
| CID6569    | PTPN1   | predicted |
| CID6569    | ABCG2   | predicted |
| CID6569    | SMN1    | predicted |

|            |         |           |
|------------|---------|-----------|
| CID6569    | PPARG   | predicted |
| CID6569    | NPSR1   | predicted |
| CID6569    | MPEG1   | predicted |
| CID6569    | KMT2A   | predicted |
| CID6569    | RAB9A   | predicted |
| CID5250    | LMNA    | predicted |
| CID5250    | PTPN1   | predicted |
| CID5250    | GPBAR1  | predicted |
| CID5250    | MAPT    | predicted |
| CID5250    | TSHR    | predicted |
| CID5250    | CYP3A4  | predicted |
| CID5250    | RAB9A   | predicted |
| CID5250    | SMN1    | predicted |
| CID5250    | TDP1    | predicted |
| CID5250    | ACHE    | predicted |
| CID5250    | NPC1    | predicted |
| CID5250    | CYP2D6  | predicted |
| CID5250    | SHBG    | predicted |
| CID5250    | MAPK1   | predicted |
| CID5250    | ALDH1A1 | predicted |
| CID5250    | HSD11B1 | predicted |
| CID5250    | KMT2A   | predicted |
| CID5250    | CYP19A1 | predicted |
| CID5250    | SHH     | predicted |
| CID5250    | BCHE    | predicted |
| CID5281697 | UGT1A7  | predicted |
| CID5281697 | CYP1A2  | predicted |
| CID5281697 | ESR1    | predicted |
| CID5281697 | ESR2    | predicted |
| CID5281697 | NR1H4   | predicted |
| CID5281697 | ABCC1   | predicted |
| CID5281697 | XDH     | predicted |
| CID5281697 | BCR     | predicted |
| CID5281697 | ABCB1   | predicted |
| CID5281697 | ALDH2   | predicted |
| CID5281697 | CYP2C9  | predicted |
| CID5281697 | CYP2C19 | predicted |
| CID5281697 | CYP3A4  | predicted |
| CID5281697 | GSTP1   | predicted |
| CID5281697 | SI      | predicted |
| CID5281697 | ABL1    | predicted |
| CID5281697 | MAPK10  | predicted |
| CID5281697 | NPC1    | predicted |
| CID5281697 | RAB9A   | predicted |
| CID5281697 | NR3C1   | predicted |
| CID5281697 | AMY1A   | Known     |
| CID5281697 | UGT1A10 | Known     |
| CID5281697 | UGT1A3  | Known     |
| CID5281697 | UGT1A9  | Known     |
| CID5281697 | UGT1A1  | Known     |
| CID5281697 | CYP1A1  | Known     |
| CID5281697 | CYP1B1  | Known     |
| CID3084961 | LMNA    | predicted |
| CID3084961 | CYP3A4  | predicted |
| CID3084961 | MAPT    | predicted |
| CID3084961 | TDP1    | predicted |
| CID3084961 | SMN1    | predicted |
| CID3084961 | TSHR    | predicted |

|             |         |           |
|-------------|---------|-----------|
| CID3084961  | RAB9A   | predicted |
| CID3084961  | ABCG2   | predicted |
| CID3084961  | NPC1    | predicted |
| CID3084961  | AKR1B1  | predicted |
| CID3084961  | PTPN1   | predicted |
| CID3084961  | POLB    | predicted |
| CID3084961  | KDM4E   | predicted |
| CID3084961  | ALDH1A1 | predicted |
| CID3084961  | TP53    | predicted |
| CID3084961  | GAA     | predicted |
| CID3084961  | IL2     | predicted |
| CID3084961  | CYP19A1 | predicted |
| CID3084961  | L3MBTL1 | predicted |
| CID3084961  | CA1     | predicted |
| CID10975    | TSHR    | predicted |
| CID10975    | LMNA    | predicted |
| CID10975    | CYP3A4  | predicted |
| CID10975    | MAPT    | predicted |
| CID10975    | PTPN1   | predicted |
| CID10975    | CNR2    | predicted |
| CID10975    | ALDH1A1 | predicted |
| CID10975    | CNR1    | predicted |
| CID10975    | TP53    | predicted |
| CID10975    | SMN1    | predicted |
| CID10975    | KMT2A   | predicted |
| CID10975    | ALOX15  | predicted |
| CID10975    | ACHE    | predicted |
| CID10975    | TDP1    | predicted |
| CID10975    | NPC1    | predicted |
| CID10975    | ALOX5   | predicted |
| CID10975    | RAB9A   | predicted |
| CID10975    | ODC1    | predicted |
| CID10975    | CYP19A1 | predicted |
| CID10975    | TRPA1   | predicted |
| CID5315649  | PTPN1   | predicted |
| CID5315649  | LMNA    | predicted |
| CID5315649  | TSHR    | predicted |
| CID5315649  | MAPT    | predicted |
| CID5315649  | ACHE    | predicted |
| CID5315649  | CYP3A4  | predicted |
| CID5315649  | ALOX15  | predicted |
| CID5315649  | ALDH1A1 | predicted |
| CID5315649  | ALOX5   | predicted |
| CID5315649  | KMT2A   | predicted |
| CID5315649  | PPARG   | predicted |
| CID5315649  | BCHE    | predicted |
| CID5315649  | TDP1    | predicted |
| CID5315649  | MAPK1   | predicted |
| CID5315649  | CYP19A1 | predicted |
| CID5315649  | SMN1    | predicted |
| CID5315649  | CNR2    | predicted |
| CID5315649  | TP53    | predicted |
| CID5315649  | CNR1    | predicted |
| CID5315649  | GPBAR1  | predicted |
| CID74600982 | LMNA    | predicted |
| CID74600982 | MAPT    | predicted |
| CID74600982 | CYP3A4  | predicted |
| CID74600982 | TDP1    | predicted |



|             |          |           |
|-------------|----------|-----------|
| CID74600982 | TSHR     | predicted |
| CID74600982 | PTPN1    | predicted |
| CID74600982 | RAB9A    | predicted |
| CID74600982 | SMN1     | predicted |
| CID74600982 | NPC1     | predicted |
| CID74600982 | CYP19A1  | predicted |
| CID74600982 | ALDH1A1  | predicted |
| CID74600982 | ABCG2    | predicted |
| CID74600982 | TP53     | predicted |
| CID74600982 | KDM4E    | predicted |
| CID74600982 | KMT2A    | predicted |
| CID74600982 | MAPK1    | predicted |
| CID74600982 | BACE1    | predicted |
| CID74600982 | POLB     | predicted |
| CID74600982 | AKR1B1   | predicted |
| CID74600982 | CA1      | predicted |
| CID160921   | CYP3A4   | predicted |
| CID160921   | MAPT     | predicted |
| CID160921   | ABCG2    | predicted |
| CID160921   | RAB9A    | predicted |
| CID160921   | NPC1     | predicted |
| CID160921   | ABCB1    | predicted |
| CID160921   | CYP19A1  | predicted |
| CID160921   | KMT2A    | predicted |
| CID160921   | ALDH1A1  | predicted |
| CID160921   | ADORA3   | predicted |
| CID160921   | MAOA     | predicted |
| CID160921   | BACE1    | predicted |
| CID160921   | KDM4E    | predicted |
| CID160921   | TP53     | predicted |
| CID160921   | F3       | predicted |
| CID160921   | TDP1     | predicted |
| CID160921   | CA1      | predicted |
| CID160921   | MAPK1    | predicted |
| CID160921   | CYP2C19  | predicted |
| CID160921   | LMNA     | predicted |
| CID12315348 | LMNA     | predicted |
| CID12315348 | PTPN1    | predicted |
| CID12315348 | CYP3A4   | predicted |
| CID12315348 | MAPT     | predicted |
| CID12315348 | TSHR     | predicted |
| CID12315348 | SMN1     | predicted |
| CID12315348 | TDP1     | predicted |
| CID12315348 | RAB9A    | predicted |
| CID12315348 | IL2      | predicted |
| CID12315348 | AKR1B1   | predicted |
| CID12315348 | HSP90AA1 | predicted |
| CID12315348 | NPC1     | predicted |
| CID12315348 | L3MBTL1  | predicted |
| CID12315348 | TNF      | predicted |
| CID12315348 | POLB     | predicted |
| CID12315348 | ALDH1A1  | predicted |
| CID12315348 | CYP19A1  | predicted |
| CID12315348 | KMT2A    | predicted |
| CID12315348 | GPBAR1   | predicted |
| CID12315348 | HSD11B1  | predicted |
| CID159029   | CYP3A4   | predicted |
| CID159029   | MAPT     | predicted |

|             |          |           |
|-------------|----------|-----------|
| CID159029   | ABCG2    | predicted |
| CID159029   | ALDH1A1  | predicted |
| CID159029   | MAOA     | predicted |
| CID159029   | TP53     | predicted |
| CID159029   | ABCB1    | predicted |
| CID159029   | LMNA     | predicted |
| CID159029   | NPC1     | predicted |
| CID159029   | CA12     | predicted |
| CID159029   | TSHR     | predicted |
| CID159029   | BACE1    | predicted |
| CID159029   | CA9      | predicted |
| CID159029   | RAB9A    | predicted |
| CID159029   | CA1      | predicted |
| CID159029   | KMT2A    | predicted |
| CID159029   | TDP1     | predicted |
| CID159029   | CA13     | predicted |
| CID159029   | CYP19A1  | predicted |
| CID159029   | HPGD     | predicted |
| CID24884282 | MAPT     | predicted |
| CID24884282 | CYP3A4   | predicted |
| CID24884282 | ALOX5    | predicted |
| CID24884282 | LMNA     | predicted |
| CID24884282 | TSHR     | predicted |
| CID24884282 | CYP2C19  | predicted |
| CID24884282 | ALDH1A1  | predicted |
| CID24884282 | ABCG2    | predicted |
| CID24884282 | CYP2C9   | predicted |
| CID24884282 | HSD17B10 | predicted |
| CID24884282 | TDP1     | predicted |
| CID24884282 | MAPK1    | predicted |
| CID24884282 | ALOX15   | predicted |
| CID24884282 | KMT2A    | predicted |
| CID24884282 | RAB9A    | predicted |
| CID24884282 | KDM4E    | predicted |
| CID24884282 | CYP19A1  | predicted |
| CID24884282 | PTPN1    | predicted |
| CID24884282 | NPC1     | predicted |
| CID24884282 | TP53     | predicted |
| CID8575     | TSHR     | predicted |
| CID8575     | LMNA     | predicted |
| CID8575     | CYP3A4   | predicted |
| CID8575     | MAPT     | predicted |
| CID8575     | CA2      | predicted |
| CID8575     | CA1      | predicted |
| CID8575     | SMN1     | predicted |
| CID8575     | CA12     | predicted |
| CID8575     | ALDH1A1  | predicted |
| CID8575     | CYP2C19  | predicted |
| CID8575     | TP53     | predicted |
| CID8575     | HPGD     | predicted |
| CID8575     | IDO1     | predicted |
| CID8575     | TDP1     | predicted |
| CID8575     | ACHE     | predicted |
| CID8575     | CDC25B   | predicted |
| CID8575     | BCL2     | predicted |
| CID8575     | CA9      | predicted |
| CID8575     | ITGA2B   | predicted |
| CID8575     | RAB9A    | predicted |

|            |         |           |
|------------|---------|-----------|
| CID5281674 | MAPT    | predicted |
| CID5281674 | CYP3A4  | predicted |
| CID5281674 | ABCG2   | predicted |
| CID5281674 | MAOA    | predicted |
| CID5281674 | RAB9A   | predicted |
| CID5281674 | ABCB1   | predicted |
| CID5281674 | BACE1   | predicted |
| CID5281674 | CYP19A1 | predicted |
| CID5281674 | NPC1    | predicted |
| CID5281674 | ALDH1A1 | predicted |
| CID5281674 | KDM4E   | predicted |
| CID5281674 | KMT2A   | predicted |
| CID5281674 | TDP1    | predicted |
| CID5281674 | TP53    | predicted |
| CID5281674 | LMNA    | predicted |
| CID5281674 | MAPK1   | predicted |
| CID5281674 | ALOX15  | predicted |
| CID5281674 | CTSV    | predicted |
| CID5281674 | CYP2C19 | predicted |
| CID5281674 | HPGD    | predicted |
| CID14296   | TSHR    | predicted |
| CID14296   | LMNA    | predicted |
| CID14296   | MAPT    | predicted |
| CID14296   | ACHE    | predicted |
| CID14296   | ALDH1A1 | predicted |
| CID14296   | CYP3A4  | predicted |
| CID14296   | MAOA    | predicted |
| CID14296   | CYP2A6  | predicted |
| CID14296   | TP53    | predicted |
| CID14296   | ABCG2   | predicted |
| CID14296   | MAPK1   | predicted |
| CID14296   | NPC1    | predicted |
| CID14296   | RAB9A   | predicted |
| CID14296   | TDP1    | predicted |
| CID14296   | SMN1    | predicted |
| CID14296   | CYP1A2  | predicted |
| CID14296   | KMT2A   | predicted |
| CID14296   | CYP19A1 | predicted |
| CID14296   | CA9     | predicted |
| CID14296   | PTPN1   | predicted |
| CID5486199 | CYP3A4  | predicted |
| CID5486199 | MAPT    | predicted |
| CID5486199 | LMNA    | predicted |
| CID5486199 | RAB9A   | predicted |
| CID5486199 | AKR1B1  | predicted |
| CID5486199 | TDP1    | predicted |
| CID5486199 | NPC1    | predicted |
| CID5486199 | ABCG2   | predicted |
| CID5486199 | POLB    | predicted |
| CID5486199 | SMN1    | predicted |
| CID5486199 | IL2     | predicted |
| CID5486199 | PDE5A   | predicted |
| CID5486199 | CYP19A1 | predicted |
| CID5486199 | L3MBTL1 | predicted |
| CID5486199 | TSHR    | predicted |
| CID5486199 | GAA     | predicted |
| CID5486199 | APEX1   | predicted |
| CID5486199 | ALDH1A1 | predicted |

|            |          |           |
|------------|----------|-----------|
| CID5486199 | PTPN1    | predicted |
| CID5486199 | KDM4E    | predicted |
| CID8748    | LMNA     | predicted |
| CID8748    | PTPN1    | predicted |
| CID8748    | MAPT     | predicted |
| CID8748    | TSHR     | predicted |
| CID8748    | CYP3A4   | predicted |
| CID8748    | RAB9A    | predicted |
| CID8748    | GPBAR1   | predicted |
| CID8748    | NPC1     | predicted |
| CID8748    | SMN1     | predicted |
| CID8748    | CYP19A1  | predicted |
| CID8748    | MAPK1    | predicted |
| CID8748    | TP53     | predicted |
| CID8748    | KMT2A    | predicted |
| CID8748    | ACHE     | predicted |
| CID8748    | TDP1     | predicted |
| CID8748    | ALDH1A1  | predicted |
| CID8748    | CNR2     | predicted |
| CID8748    | CNR1     | predicted |
| CID8748    | HSD11B1  | predicted |
| CID8748    | ALOX15   | predicted |
| CID637566  | MAPT     | predicted |
| CID637566  | ALOX12   | predicted |
| CID637566  | HSD17B10 | predicted |
| CID637566  | ALDH1A1  | predicted |
| CID637566  | KDM4E    | predicted |
| CID637566  | HPGD     | predicted |
| CID637566  | USP2     | predicted |
| CID637566  | TP53     | predicted |
| CID637566  | MAPK1    | predicted |
| CID637566  | ALOX5    | predicted |
| CID637566  | PIM1     | predicted |
| CID637566  | RECQL    | predicted |
| CID637566  | CYP3A4   | predicted |
| CID637566  | TDP1     | predicted |
| CID637566  | LMNA     | predicted |
| CID637566  | HIF1A    | predicted |
| CID637566  | BRCA1    | predicted |
| CID637566  | NPSR1    | predicted |
| CID637566  | CYP2C9   | predicted |
| CID637566  | APEX1    | predicted |
| CID637566  | ALOX15   | Known     |
| CID637566  | KMT2A    | Known     |
| CID14529   | ACHE     | predicted |
| CID14529   | LMNA     | predicted |
| CID14529   | CYP2A6   | predicted |
| CID14529   | CNR2     | predicted |
| CID14529   | CNR1     | predicted |
| CID14529   | CYP3A4   | predicted |
| CID14529   | MAPT     | predicted |
| CID14529   | ESRRG    | predicted |
| CID14529   | CYP19A1  | predicted |
| CID14529   | ALDH1A1  | predicted |
| CID14529   | PTPN1    | predicted |
| CID14529   | SHBG     | predicted |
| CID14529   | ESR2     | predicted |
| CID14529   | ODC1     | predicted |

|           |          |           |
|-----------|----------|-----------|
| CID14529  | TSHR     | predicted |
| CID14529  | KMT2A    | predicted |
| CID14529  | TDP1     | predicted |
| CID14529  | SMN1     | predicted |
| CID14529  | TYR      | predicted |
| CID14529  | NPC1     | predicted |
| CID8842   | HSD17B10 | predicted |
| CID8842   | HPGD     | predicted |
| CID8842   | MAPT     | predicted |
| CID8842   | ALOX12   | predicted |
| CID8842   | KDM4E    | predicted |
| CID8842   | TDP1     | predicted |
| CID8842   | TRPA1    | predicted |
| CID8842   | CYP3A4   | predicted |
| CID8842   | TP53     | predicted |
| CID8842   | RECQL    | predicted |
| CID8842   | LMNA     | predicted |
| CID8842   | HIF1A    | predicted |
| CID8842   | KMT2A    | predicted |
| CID8842   | USP2     | predicted |
| CID8842   | MAPK1    | predicted |
| CID8842   | CYP2A6   | predicted |
| CID8842   | ALOX5    | predicted |
| CID8842   | TSHR     | predicted |
| CID8842   | APEX1    | predicted |
| CID8842   | BRCA1    | predicted |
| CID8842   | ALDH1A1  | Known     |
| CID8842   | ALOX15   | Known     |
| CID528708 | LMNA     | predicted |
| CID528708 | MAPT     | predicted |
| CID528708 | TSHR     | predicted |
| CID528708 | PTPN1    | predicted |
| CID528708 | CYP3A4   | predicted |
| CID528708 | CYP19A1  | predicted |
| CID528708 | ACHE     | predicted |
| CID528708 | ALDH1A1  | predicted |
| CID528708 | PPARG    | predicted |
| CID528708 | TDP1     | predicted |
| CID528708 | KMT2A    | predicted |
| CID528708 | RAB9A    | predicted |
| CID528708 | SMN1     | predicted |
| CID528708 | MAPK1    | predicted |
| CID528708 | CNR2     | predicted |
| CID528708 | ALOX15   | predicted |
| CID528708 | NPC1     | predicted |
| CID528708 | TYR      | predicted |
| CID528708 | TP53     | predicted |
| CID528708 | PTGS1    | predicted |
| CID521243 | NR1H3    | predicted |
| CID521243 | PTPN1    | predicted |
| CID521243 | PRKCD    | predicted |
| CID521243 | LMNA     | predicted |
| CID521243 | TSHR     | predicted |
| CID521243 | MAPT     | predicted |
| CID521243 | GPBAR1   | predicted |
| CID521243 | HSD11B1  | predicted |
| CID521243 | CYP3A4   | predicted |
| CID521243 | ACHE     | predicted |

|            |         |           |
|------------|---------|-----------|
| CID521243  | RAB9A   | predicted |
| CID521243  | PRKCA   | predicted |
| CID521243  | XBP1    | predicted |
| CID521243  | NPC1    | predicted |
| CID521243  | ALDH1A1 | predicted |
| CID521243  | CYP19A1 | predicted |
| CID521243  | TNF     | predicted |
| CID521243  | TDP1    | predicted |
| CID521243  | SMN1    | predicted |
| CID521243  | ESR1    | predicted |
| CID18827   | TSHR    | predicted |
| CID18827   | LMNA    | predicted |
| CID18827   | MAPT    | predicted |
| CID18827   | CNR2    | predicted |
| CID18827   | CYP3A4  | predicted |
| CID18827   | CNR1    | predicted |
| CID18827   | ALDH1A1 | predicted |
| CID18827   | PTPN1   | predicted |
| CID18827   | TRPV1   | predicted |
| CID18827   | ALOX5   | predicted |
| CID18827   | MPEG1   | predicted |
| CID18827   | PPARG   | predicted |
| CID18827   | TP53    | predicted |
| CID18827   | HMGCR   | predicted |
| CID18827   | SMN1    | predicted |
| CID18827   | TDP1    | predicted |
| CID18827   | FAAH    | predicted |
| CID18827   | ALOX15  | predicted |
| CID18827   | ACHE    | predicted |
| CID18827   | MAPK1   | predicted |
| CID5281516 | TSHR    | predicted |
| CID5281516 | ALDH1A1 | predicted |
| CID5281516 | PTPN1   | predicted |
| CID5281516 | ALOX15  | predicted |
| CID5281516 | CYP3A4  | predicted |
| CID5281516 | ALOX5   | predicted |
| CID5281516 | LMNA    | predicted |
| CID5281516 | TRPA1   | predicted |
| CID5281516 | MAPT    | predicted |
| CID5281516 | CNR2    | predicted |
| CID5281516 | TP53    | predicted |
| CID5281516 | ACHE    | predicted |
| CID5281516 | KMT2A   | predicted |
| CID5281516 | CNR1    | predicted |
| CID5281516 | PPARG   | predicted |
| CID5281516 | PPARA   | predicted |
| CID5281516 | ABCG2   | predicted |
| CID5281516 | TDP1    | predicted |
| CID5281516 | BCHE    | predicted |
| CID5281516 | MAOB    | predicted |
| CID326     | CYP2A6  | predicted |
| CID326     | ALDH1A1 | predicted |
| CID326     | TYR     | predicted |
| CID326     | LMNA    | predicted |
| CID326     | TSHR    | predicted |
| CID326     | MAPT    | predicted |
| CID326     | TRPA1   | predicted |
| CID326     | CNR2    | predicted |

|            |          |           |
|------------|----------|-----------|
| CID326     | CYP19A1  | predicted |
| CID326     | CNR1     | predicted |
| CID326     | CYP3A4   | predicted |
| CID326     | RAB9A    | predicted |
| CID326     | TDP1     | predicted |
| CID326     | PPARG    | predicted |
| CID326     | NPC1     | predicted |
| CID326     | PTGS1    | predicted |
| CID326     | ACHE     | predicted |
| CID326     | ESR1     | predicted |
| CID326     | PTPN1    | predicted |
| CID326     | KMT2A    | predicted |
| CID322363  | LMNA     | predicted |
| CID322363  | CYP3A4   | predicted |
| CID322363  | EGFR     | predicted |
| CID322363  | SMN1     | predicted |
| CID322363  | TSHR     | predicted |
| CID322363  | MAPT     | predicted |
| CID322363  | TDP1     | predicted |
| CID322363  | RAB9A    | predicted |
| CID322363  | BLM      | predicted |
| CID322363  | AKR1B1   | predicted |
| CID322363  | HSP90AA1 | predicted |
| CID322363  | NPC1     | predicted |
| CID322363  | IL2      | predicted |
| CID322363  | KMT2A    | predicted |
| CID322363  | ALDH1A1  | predicted |
| CID322363  | POLB     | predicted |
| CID322363  | PRKCA    | predicted |
| CID322363  | TOP1     | predicted |
| CID322363  | ACHE     | predicted |
| CID322363  | F10      | predicted |
| CID7929    | BCHE     | predicted |
| CID7929    | GDA      | predicted |
| CID7929    | LMNA     | predicted |
| CID7929    | ADORA2A  | predicted |
| CID7929    | TOP1     | predicted |
| CID7929    | KCNH2    | predicted |
| CID7929    | CYP2A6   | predicted |
| CID7929    | SENP8    | predicted |
| CID7929    | CYP2A13  | predicted |
| CID7929    | CYP3A4   | predicted |
| CID7929    | CYP2D6   | predicted |
| CID7929    | CYP2C19  | predicted |
| CID7929    | CASP1    | predicted |
| CID7929    | NMUR2    | predicted |
| CID7929    | BACE1    | predicted |
| CID7929    | BLM      | predicted |
| CID7929    | CYP2C9   | predicted |
| CID7929    | CES1     | predicted |
| CID7929    | PRKCE    | predicted |
| CID7929    | HSD17B10 | predicted |
| CID7929    | ACHE     | Known     |
| CID6426802 | CYP3A4   | predicted |
| CID6426802 | MAPT     | predicted |
| CID6426802 | LMNA     | predicted |
| CID6426802 | ABCG2    | predicted |
| CID6426802 | RAB9A    | predicted |

|             |          |           |
|-------------|----------|-----------|
| CID6426802  | TDP1     | predicted |
| CID6426802  | NPC1     | predicted |
| CID6426802  | SMN1     | predicted |
| CID6426802  | CYP19A1  | predicted |
| CID6426802  | BACE1    | predicted |
| CID6426802  | POLB     | predicted |
| CID6426802  | KMT2A    | predicted |
| CID6426802  | KDM4E    | predicted |
| CID6426802  | AKR1B1   | predicted |
| CID6426802  | PTPN1    | predicted |
| CID6426802  | ALDH1A1  | predicted |
| CID6426802  | MAPK1    | predicted |
| CID6426802  | APEX1    | predicted |
| CID6426802  | TSHR     | predicted |
| CID6426802  | GAA      | predicted |
| CID13644660 | CYP3A4   | predicted |
| CID13644660 | MAPT     | predicted |
| CID13644660 | LMNA     | predicted |
| CID13644660 | CYP19A1  | predicted |
| CID13644660 | RAB9A    | predicted |
| CID13644660 | TDP1     | predicted |
| CID13644660 | IL2      | predicted |
| CID13644660 | NPC1     | predicted |
| CID13644660 | AKR1B1   | predicted |
| CID13644660 | APEX1    | predicted |
| CID13644660 | SMN1     | predicted |
| CID13644660 | POLB     | predicted |
| CID13644660 | ABCG2    | predicted |
| CID13644660 | BACE1    | predicted |
| CID13644660 | PTPN1    | predicted |
| CID13644660 | L3MBTL1  | predicted |
| CID13644660 | TSHR     | predicted |
| CID13644660 | HSP90AA1 | predicted |
| CID13644660 | ACHE     | predicted |
| CID13644660 | MAPK1    | predicted |
| CID3550102  | CYP19A1  | predicted |
| CID3550102  | CYP3A4   | predicted |
| CID3550102  | MAPT     | predicted |
| CID3550102  | ABCG2    | predicted |
| CID3550102  | RAB9A    | predicted |
| CID3550102  | LMNA     | predicted |
| CID3550102  | NPC1     | predicted |
| CID3550102  | BACE1    | predicted |
| CID3550102  | TDP1     | predicted |
| CID3550102  | POLB     | predicted |
| CID3550102  | KMT2A    | predicted |
| CID3550102  | APEX1    | predicted |
| CID3550102  | SMN1     | predicted |
| CID3550102  | AKR1B1   | predicted |
| CID3550102  | MAPK1    | predicted |
| CID3550102  | IL2      | predicted |
| CID3550102  | PTPN1    | predicted |
| CID3550102  | ALDH1A1  | predicted |
| CID3550102  | L3MBTL1  | predicted |
| CID3550102  | ACHE     | predicted |
| CID5271991  | MAPT     | predicted |
| CID5271991  | CYP3A4   | predicted |
| CID5271991  | ABCG2    | predicted |



|            |         |           |
|------------|---------|-----------|
| CID5271991 | MAOA    | predicted |
| CID5271991 | CYP19A1 | predicted |
| CID5271991 | BACE1   | predicted |
| CID5271991 | RAB9A   | predicted |
| CID5271991 | NPC1    | predicted |
| CID5271991 | ALDH1A1 | predicted |
| CID5271991 | TDP1    | predicted |
| CID5271991 | KDM4E   | predicted |
| CID5271991 | KMT2A   | predicted |
| CID5271991 | ABCB1   | predicted |
| CID5271991 | MAPK1   | predicted |
| CID5271991 | LMNA    | predicted |
| CID5271991 | TP53    | predicted |
| CID5271991 | ACHE    | predicted |
| CID5271991 | CTSV    | predicted |
| CID5271991 | CYP2C19 | predicted |
| CID5271991 | ALOX15  | predicted |
| CID439713  | USP7    | predicted |
| CID439713  | EPHX1   | predicted |
| CID439713  | EPHX2   | predicted |
| CID439713  | HTR2C   | predicted |
| CID439713  | GDA     | predicted |
| CID439713  | HTR2B   | predicted |
| CID439713  | MAPT    | predicted |
| CID439713  | LMNA    | predicted |
| CID439713  | L3MBTL1 | predicted |
| CID439713  | MAOA    | predicted |
| CID439713  | MAPK1   | predicted |
| CID439713  | MAP2K1  | predicted |
| CID439713  | CYP3A4  | predicted |
| CID439713  | GAA     | predicted |
| CID439713  | USP2    | predicted |
| CID439713  | NPC1    | predicted |
| CID439713  | BLM     | predicted |
| CID439713  | TSHR    | predicted |
| CID439713  | KDM4E   | predicted |
| CID439713  | HTR5A   | predicted |
| CID222284  | PTPN1   | predicted |
| CID222284  | LMNA    | predicted |
| CID222284  | GPBAR1  | predicted |
| CID222284  | TSHR    | predicted |
| CID222284  | MAPT    | predicted |
| CID222284  | CYP3A4  | predicted |
| CID222284  | RAB9A   | predicted |
| CID222284  | SHBG    | predicted |
| CID222284  | HSD11B1 | predicted |
| CID222284  | SMN1    | predicted |
| CID222284  | NPC1    | predicted |
| CID222284  | CYP19A1 | predicted |
| CID222284  | TDP1    | predicted |
| CID222284  | TP53    | predicted |
| CID222284  | MAPK1   | predicted |
| CID222284  | SLCO1B3 | predicted |
| CID222284  | SLCO1B1 | predicted |
| CID222284  | TNF     | predicted |
| CID222284  | ALDH1A1 | predicted |
| CID222284  | KMT2A   | predicted |
| CID61126   | PTPN1   | predicted |

|           |         |           |
|-----------|---------|-----------|
| CID61126  | TSHR    | predicted |
| CID61126  | LMNA    | predicted |
| CID61126  | CYP3A4  | predicted |
| CID61126  | MAPT    | predicted |
| CID61126  | GPBAR1  | predicted |
| CID61126  | SMN1    | predicted |
| CID61126  | RAB9A   | predicted |
| CID61126  | HSD11B1 | predicted |
| CID61126  | TDP1    | predicted |
| CID61126  | TP53    | predicted |
| CID61126  | CYP19A1 | predicted |
| CID61126  | NPC1    | predicted |
| CID61126  | KMT2A   | predicted |
| CID61126  | SLCO1B3 | predicted |
| CID61126  | TNF     | predicted |
| CID61126  | SLCO1B1 | predicted |
| CID61126  | ALDH1A1 | predicted |
| CID61126  | ACHE    | predicted |
| CID61126  | SHBG    | predicted |
| CID534398 | LMNA    | predicted |
| CID534398 | PTPN1   | predicted |
| CID534398 | NR1H3   | predicted |
| CID534398 | PRKCD   | predicted |
| CID534398 | MAPT    | predicted |
| CID534398 | TSHR    | predicted |
| CID534398 | GPBAR1  | predicted |
| CID534398 | CYP3A4  | predicted |
| CID534398 | RAB9A   | predicted |
| CID534398 | HSD11B1 | predicted |
| CID534398 | SMN1    | predicted |
| CID534398 | NPC1    | predicted |
| CID534398 | SHBG    | predicted |
| CID534398 | ACHE    | predicted |
| CID534398 | XBP1    | predicted |
| CID534398 | PRKCA   | predicted |
| CID534398 | CYP19A1 | predicted |
| CID534398 | ESR1    | predicted |
| CID534398 | TDP1    | predicted |
| CID534398 | NPSR1   | predicted |
| CID204    | USP7    | predicted |
| CID204    | EPHX1   | predicted |
| CID204    | EPHX2   | predicted |
| CID204    | HTR2C   | predicted |
| CID204    | GDA     | predicted |
| CID204    | HTR2B   | predicted |
| CID204    | MAPT    | predicted |
| CID204    | LMNA    | predicted |
| CID204    | L3MBTL1 | predicted |
| CID204    | MAOA    | predicted |
| CID204    | MAPK1   | predicted |
| CID204    | MAP2K1  | predicted |
| CID204    | CYP3A4  | predicted |
| CID204    | GAA     | predicted |
| CID204    | USP2    | predicted |
| CID204    | NPC1    | predicted |
| CID204    | BLM     | predicted |
| CID204    | TSHR    | predicted |
| CID204    | KDM4E   | predicted |

|             |          |           |
|-------------|----------|-----------|
| CID204      | HTR5A    | predicted |
| CID13305018 | LMNA     | predicted |
| CID13305018 | CYP3A4   | predicted |
| CID13305018 | PTPN1    | predicted |
| CID13305018 | MAPT     | predicted |
| CID13305018 | TSHR     | predicted |
| CID13305018 | RAB9A    | predicted |
| CID13305018 | SMN1     | predicted |
| CID13305018 | NPC1     | predicted |
| CID13305018 | GPBAR1   | predicted |
| CID13305018 | KMT2A    | predicted |
| CID13305018 | CYP19A1  | predicted |
| CID13305018 | TDP1     | predicted |
| CID13305018 | HTT      | predicted |
| CID13305018 | HSP90AA1 | predicted |
| CID13305018 | HSD11B1  | predicted |
| CID13305018 | ALDH1A1  | predicted |
| CID13305018 | AKR1B10  | predicted |
| CID13305018 | NFKB1    | predicted |
| CID13305018 | NPSR1    | predicted |
| CID13305018 | TP53     | predicted |
| CID3999     | DRD1     | predicted |
| CID3999     | CYP2D6   | predicted |
| CID3999     | CYP3A4   | predicted |
| CID3999     | F3       | predicted |
| CID3999     | DRD2     | predicted |
| CID3999     | MAPT     | predicted |
| CID3999     | CHRNA2   | predicted |
| CID3999     | LMNA     | predicted |
| CID3999     | TSHR     | predicted |
| CID3999     | CHRFAM7A | predicted |
| CID3999     | ACHE     | predicted |
| CID3999     | HTR2C    | predicted |
| CID3999     | TAAR1    | predicted |
| CID3999     | HTR1A    | predicted |
| CID3999     | HTR2A    | predicted |
| CID3999     | CYP2C19  | predicted |
| CID3999     | ALDH1A1  | predicted |
| CID3999     | HTR2B    | predicted |
| CID3999     | TDP1     | predicted |
| CID3999     | MAOA     | predicted |
| CID6852197  | USP7     | predicted |
| CID6852197  | GDA      | predicted |
| CID6852197  | HTR2C    | predicted |
| CID6852197  | HTR2B    | predicted |
| CID6852197  | MAOA     | predicted |
| CID6852197  | LMNA     | predicted |
| CID6852197  | PARP1    | predicted |
| CID6852197  | MAPT     | predicted |
| CID6852197  | MAPK1    | predicted |
| CID6852197  | EPHX1    | predicted |
| CID6852197  | EPHX2    | predicted |
| CID6852197  | MAP2K1   | predicted |
| CID6852197  | L3MBTL1  | predicted |
| CID6852197  | TAAR1    | predicted |
| CID6852197  | NPC1     | predicted |
| CID6852197  | HTR5A    | predicted |
| CID6852197  | TSHR     | predicted |

|             |         |           |
|-------------|---------|-----------|
| CID6852197  | BLM     | predicted |
| CID6852197  | GAA     | predicted |
| CID6852197  | HTR2A   | predicted |
| CID76077501 | PTPN1   | predicted |
| CID76077501 | LMNA    | predicted |
| CID76077501 | GPBAR1  | predicted |
| CID76077501 | TSHR    | predicted |
| CID76077501 | MAPT    | predicted |
| CID76077501 | CYP3A4  | predicted |
| CID76077501 | HSD11B1 | predicted |
| CID76077501 | SHBG    | predicted |
| CID76077501 | RAB9A   | predicted |
| CID76077501 | SMN1    | predicted |
| CID76077501 | NPC1    | predicted |
| CID76077501 | CYP19A1 | predicted |
| CID76077501 | TDP1    | predicted |
| CID76077501 | AKR1B10 | predicted |
| CID76077501 | SLCO1B1 | predicted |
| CID76077501 | SLCO1B3 | predicted |
| CID76077501 | TRPM8   | predicted |
| CID76077501 | TNF     | predicted |
| CID76077501 | MAPK1   | predicted |
| CID76077501 | KMT2A   | predicted |
| CID5192     | HMGCR   | predicted |
| CID5192     | TSHR    | predicted |
| CID5192     | LMNA    | predicted |
| CID5192     | PPARG   | predicted |
| CID5192     | OXER1   | predicted |
| CID5192     | PPARA   | predicted |
| CID5192     | PPARD   | predicted |
| CID5192     | PTPN1   | predicted |
| CID5192     | FABP3   | predicted |
| CID5192     | PTGIR   | predicted |
| CID5192     | MAPT    | predicted |
| CID5192     | MPEG1   | predicted |
| CID5192     | FAAH    | predicted |
| CID5192     | NFKB1   | predicted |
| CID5192     | CYP3A4  | predicted |
| CID5192     | TDP1    | predicted |
| CID5192     | ALOX5   | predicted |
| CID5192     | TLR2    | predicted |
| CID5192     | SMN1    | predicted |
| CID5192     | ALDH1A1 | predicted |
| CID304      | LMNA    | predicted |
| CID304      | PTPN1   | predicted |
| CID304      | GPBAR1  | predicted |
| CID304      | TSHR    | predicted |
| CID304      | MAPT    | predicted |
| CID304      | CYP3A4  | predicted |
| CID304      | VDR     | predicted |
| CID304      | RAB9A   | predicted |
| CID304      | SHBG    | predicted |
| CID304      | HSD11B1 | predicted |
| CID304      | SMN1    | predicted |
| CID304      | NPC1    | predicted |
| CID304      | ALOX15  | predicted |
| CID304      | CYP19A1 | predicted |
| CID304      | TDP1    | predicted |

|            |         |           |
|------------|---------|-----------|
| CID304     | SLCO1B3 | predicted |
| CID304     | SLCO1B1 | predicted |
| CID304     | TNF     | predicted |
| CID304     | TP53    | predicted |
| CID304     | MAPK1   | predicted |
| CID520468  | TRPA1   | predicted |
| CID520468  | PTGS1   | predicted |
| CID520468  | TYR     | predicted |
| CID520468  | PTPN1   | predicted |
| CID520468  | MAPT    | predicted |
| CID520468  | CYP3A4  | predicted |
| CID520468  | LMNA    | predicted |
| CID520468  | CNR2    | predicted |
| CID520468  | ALOX15  | predicted |
| CID520468  | CNR1    | predicted |
| CID520468  | ALDH1A1 | predicted |
| CID520468  | ACHE    | predicted |
| CID520468  | TSHR    | predicted |
| CID520468  | KMT2A   | predicted |
| CID520468  | CYP19A1 | predicted |
| CID520468  | AKR1B1  | predicted |
| CID520468  | TDP1    | predicted |
| CID520468  | PPARG   | predicted |
| CID520468  | MAPK1   | predicted |
| CID520468  | ABCG2   | predicted |
| CID5315433 | TSHR    | predicted |
| CID5315433 | PTPN1   | predicted |
| CID5315433 | CYP3A4  | predicted |
| CID5315433 | LMNA    | predicted |
| CID5315433 | MAPT    | predicted |
| CID5315433 | TP53    | predicted |
| CID5315433 | ESR1    | predicted |
| CID5315433 | ALDH1A1 | predicted |
| CID5315433 | MAPK1   | predicted |
| CID5315433 | NPC1    | predicted |
| CID5315433 | RAB9A   | predicted |
| CID5315433 | ESR2    | predicted |
| CID5315433 | EED     | predicted |
| CID5315433 | SMN1    | predicted |
| CID5315433 | CYP2A6  | predicted |
| CID5315433 | TDP1    | predicted |
| CID5315433 | TRPA1   | predicted |
| CID5315433 | KMT2A   | predicted |
| CID5315433 | CYP19A1 | predicted |
| CID5315433 | GPBAR1  | predicted |
| CID6442374 | TSHR    | predicted |
| CID6442374 | CYP3A4  | predicted |
| CID6442374 | MAPT    | predicted |
| CID6442374 | PTPN1   | predicted |
| CID6442374 | ESR1    | predicted |
| CID6442374 | LMNA    | predicted |
| CID6442374 | TP53    | predicted |
| CID6442374 | ALDH1A1 | predicted |
| CID6442374 | MAPK1   | predicted |
| CID6442374 | CYP2A6  | predicted |
| CID6442374 | EED     | predicted |
| CID6442374 | NPC1    | predicted |
| CID6442374 | ESR2    | predicted |

|             |         |           |
|-------------|---------|-----------|
| CID6442374  | RAB9A   | predicted |
| CID6442374  | ELAVL1  | predicted |
| CID6442374  | ALOX15  | predicted |
| CID6442374  | MYLK    | predicted |
| CID6442374  | TDP1    | predicted |
| CID6442374  | KDM4E   | predicted |
| CID6442374  | ACHE    | predicted |
| CID5317424  | TSHR    | predicted |
| CID5317424  | ESR1    | predicted |
| CID5317424  | PTPN1   | predicted |
| CID5317424  | CYP3A4  | predicted |
| CID5317424  | EED     | predicted |
| CID5317424  | CYP2A6  | predicted |
| CID5317424  | TP53    | predicted |
| CID5317424  | LMNA    | predicted |
| CID5317424  | MAPK1   | predicted |
| CID5317424  | MAPT    | predicted |
| CID5317424  | ESR2    | predicted |
| CID5317424  | ALDH1A1 | predicted |
| CID5317424  | ELAVL1  | predicted |
| CID5317424  | MYLK    | predicted |
| CID5317424  | NPC1    | predicted |
| CID5317424  | PTPRC   | predicted |
| CID5317424  | PLA2G1B | predicted |
| CID5317424  | ALOX15  | predicted |
| CID5317424  | ACHE    | predicted |
| CID5317424  | RAB9A   | predicted |
| CID71773128 | LMNA    | predicted |
| CID71773128 | PTPN1   | predicted |
| CID71773128 | TSHR    | predicted |
| CID71773128 | MAPT    | predicted |
| CID71773128 | CYP3A4  | predicted |
| CID71773128 | RAB9A   | predicted |
| CID71773128 | NPC1    | predicted |
| CID71773128 | GPBAR1  | predicted |
| CID71773128 | SMN1    | predicted |
| CID71773128 | HSD11B1 | predicted |
| CID71773128 | CYP19A1 | predicted |
| CID71773128 | KMT2A   | predicted |
| CID71773128 | ACHE    | predicted |
| CID71773128 | ALDH1A1 | predicted |
| CID71773128 | TDP1    | predicted |
| CID71773128 | TP53    | predicted |
| CID71773128 | ALOX15  | predicted |
| CID71773128 | SHBG    | predicted |
| CID71773128 | CNR2    | predicted |
| CID71773128 | HTT     | predicted |
| CID1549025  | LMNA    | predicted |
| CID1549025  | CYP3A4  | predicted |
| CID1549025  | ALDH1A1 | predicted |
| CID1549025  | MAPT    | predicted |
| CID1549025  | TSHR    | predicted |
| CID1549025  | PTPN1   | predicted |
| CID1549025  | KMT2A   | predicted |
| CID1549025  | ALOX15  | predicted |
| CID1549025  | TP53    | predicted |
| CID1549025  | TDP1    | predicted |
| CID1549025  | SMN1    | predicted |

|            |          |           |
|------------|----------|-----------|
| CID1549025 | MAPK1    | predicted |
| CID1549025 | CA9      | predicted |
| CID1549025 | RAB9A    | predicted |
| CID1549025 | ACHE     | predicted |
| CID1549025 | PPARG    | predicted |
| CID1549025 | NPC1     | predicted |
| CID1549025 | CA1      | predicted |
| CID1549025 | ALOX5    | predicted |
| CID1549025 | ABCG2    | predicted |
| CID195809  | LMNA     | predicted |
| CID195809  | CYP2D6   | predicted |
| CID195809  | GLI1     | predicted |
| CID195809  | GLI2     | predicted |
| CID195809  | DRD1     | predicted |
| CID195809  | CYP3A4   | predicted |
| CID195809  | TSHR     | predicted |
| CID195809  | ACHE     | predicted |
| CID195809  | MAPT     | predicted |
| CID195809  | CHRNA2   | predicted |
| CID195809  | ALDH1A1  | predicted |
| CID195809  | MAPK1    | predicted |
| CID195809  | DRD2     | predicted |
| CID195809  | MAOA     | predicted |
| CID195809  | BCHE     | predicted |
| CID195809  | F3       | predicted |
| CID195809  | CHRFAM7A | predicted |
| CID195809  | HTR2C    | predicted |
| CID195809  | MAOB     | predicted |
| CID195809  | HTR2B    | predicted |
| CID5320237 | TSHR     | predicted |
| CID5320237 | LMNA     | predicted |
| CID5320237 | CYP3A4   | predicted |
| CID5320237 | MAPT     | predicted |
| CID5320237 | TDP1     | predicted |
| CID5320237 | ALOX5    | predicted |
| CID5320237 | MPEG1    | predicted |
| CID5320237 | SMN1     | predicted |
| CID5320237 | AKR1B1   | predicted |
| CID5320237 | HMGCR    | predicted |
| CID5320237 | ACHE     | predicted |
| CID5320237 | RAB9A    | predicted |
| CID5320237 | ALDH1A1  | predicted |
| CID5320237 | ALOX15   | predicted |
| CID5320237 | CA9      | predicted |
| CID5320237 | PTPN1    | predicted |
| CID5320237 | CA1      | predicted |
| CID5320237 | KMT2A    | predicted |
| CID5320237 | TP53     | predicted |
| CID5320237 | FAAH     | predicted |
| CID5281223 | PTPN1    | predicted |
| CID5281223 | LMNA     | predicted |
| CID5281223 | MAPT     | predicted |
| CID5281223 | GPBAR1   | predicted |
| CID5281223 | CYP3A4   | predicted |
| CID5281223 | TSHR     | predicted |
| CID5281223 | RAB9A    | predicted |
| CID5281223 | SMN1     | predicted |
| CID5281223 | NPC1     | predicted |

|             |         |           |
|-------------|---------|-----------|
| CID5281223  | HSD11B1 | predicted |
| CID5281223  | TP53    | predicted |
| CID5281223  | TDP1    | predicted |
| CID5281223  | SLCO1B3 | predicted |
| CID5281223  | AKR1B10 | predicted |
| CID5281223  | SHBG    | predicted |
| CID5281223  | SLCO1B1 | predicted |
| CID5281223  | CYP19A1 | predicted |
| CID5281223  | KMT2A   | predicted |
| CID5281223  | MAPK1   | predicted |
| CID5281223  | ALDH1A1 | predicted |
| CID12305767 | PTPN1   | predicted |
| CID12305767 | GPBAR1  | predicted |
| CID12305767 | LMNA    | predicted |
| CID12305767 | HSD11B1 | predicted |
| CID12305767 | MAPT    | predicted |
| CID12305767 | TSHR    | predicted |
| CID12305767 | CYP3A4  | predicted |
| CID12305767 | AKR1B10 | predicted |
| CID12305767 | SMN1    | predicted |
| CID12305767 | SHBG    | predicted |
| CID12305767 | RAB9A   | predicted |
| CID12305767 | TNF     | predicted |
| CID12305767 | CYP19A1 | predicted |
| CID12305767 | TDP1    | predicted |
| CID12305767 | PTPN2   | predicted |
| CID12305767 | NPC1    | predicted |
| CID12305767 | NPSR1   | predicted |
| CID12305767 | SLCO1B3 | predicted |
| CID12305767 | SLCO1B1 | predicted |
| CID12305767 | ALDH1A1 | predicted |
| CID5320313  | MAPT    | predicted |
| CID5320313  | CYP3A4  | predicted |
| CID5320313  | ABCG2   | predicted |
| CID5320313  | RAB9A   | predicted |
| CID5320313  | LMNA    | predicted |
| CID5320313  | NPC1    | predicted |
| CID5320313  | TDP1    | predicted |
| CID5320313  | BACE1   | predicted |
| CID5320313  | CYP19A1 | predicted |
| CID5320313  | AKR1B1  | predicted |
| CID5320313  | KDM4E   | predicted |
| CID5320313  | IL2     | predicted |
| CID5320313  | ALDH1A1 | predicted |
| CID5320313  | POLB    | predicted |
| CID5320313  | SMN1    | predicted |
| CID5320313  | TSHR    | predicted |
| CID5320313  | APEX1   | predicted |
| CID5320313  | KMT2A   | predicted |
| CID5320313  | L3MBTL1 | predicted |
| CID5320313  | MAOA    | predicted |
| CID623002   | MAPT    | predicted |
| CID623002   | CYP3A4  | predicted |
| CID623002   | ABCG2   | predicted |
| CID623002   | RAB9A   | predicted |
| CID623002   | LMNA    | predicted |
| CID623002   | NPC1    | predicted |
| CID623002   | TDP1    | predicted |



|             |         |           |
|-------------|---------|-----------|
| CID623002   | BACE1   | predicted |
| CID623002   | CYP19A1 | predicted |
| CID623002   | AKR1B1  | predicted |
| CID623002   | KDM4E   | predicted |
| CID623002   | IL2     | predicted |
| CID623002   | ALDH1A1 | predicted |
| CID623002   | POLB    | predicted |
| CID623002   | SMN1    | predicted |
| CID623002   | TSHR    | predicted |
| CID623002   | APEX1   | predicted |
| CID623002   | KMT2A   | predicted |
| CID623002   | L3MBTL1 | predicted |
| CID623002   | MAOA    | predicted |
| CID12305768 | PTPN1   | predicted |
| CID12305768 | GPBAR1  | predicted |
| CID12305768 | LMNA    | predicted |
| CID12305768 | HSD11B1 | predicted |
| CID12305768 | MAPT    | predicted |
| CID12305768 | TSHR    | predicted |
| CID12305768 | CYP3A4  | predicted |
| CID12305768 | AKR1B10 | predicted |
| CID12305768 | SMN1    | predicted |
| CID12305768 | SHBG    | predicted |
| CID12305768 | RAB9A   | predicted |
| CID12305768 | TNF     | predicted |
| CID12305768 | CYP19A1 | predicted |
| CID12305768 | TDP1    | predicted |
| CID12305768 | PTPN2   | predicted |
| CID12305768 | NPC1    | predicted |
| CID12305768 | NPSR1   | predicted |
| CID12305768 | SLCO1B3 | predicted |
| CID12305768 | SLCO1B1 | predicted |
| CID12305768 | ALDH1A1 | predicted |
| CID10494    | PTPN1   | predicted |
| CID10494    | LMNA    | predicted |
| CID10494    | GPBAR1  | predicted |
| CID10494    | TSHR    | predicted |
| CID10494    | HSD11B1 | predicted |
| CID10494    | MAPT    | predicted |
| CID10494    | CYP3A4  | predicted |
| CID10494    | AKR1B10 | predicted |
| CID10494    | SMN1    | predicted |
| CID10494    | RAB9A   | predicted |
| CID10494    | PTPN2   | predicted |
| CID10494    | TNF     | predicted |
| CID10494    | SHBG    | predicted |
| CID10494    | CYP19A1 | predicted |
| CID10494    | SLCO1B3 | predicted |
| CID10494    | SLCO1B1 | predicted |
| CID10494    | TDP1    | predicted |
| CID10494    | NPC1    | predicted |
| CID10494    | NPSR1   | predicted |
| CID10494    | ALDH1A1 | predicted |
| CID558221   | ACHE    | predicted |
| CID558221   | CYP19A1 | predicted |
| CID558221   | PTPN1   | predicted |
| CID558221   | LMNA    | predicted |
| CID558221   | MAPT    | predicted |

|            |          |           |
|------------|----------|-----------|
| CID558221  | CYP2A6   | predicted |
| CID558221  | CYP3A4   | predicted |
| CID558221  | TSHR     | predicted |
| CID558221  | ALDH1A1  | predicted |
| CID558221  | ALOX15   | predicted |
| CID558221  | PPARG    | predicted |
| CID558221  | CNR2     | predicted |
| CID558221  | KDM4E    | predicted |
| CID558221  | ABCG2    | predicted |
| CID558221  | CNR1     | predicted |
| CID558221  | TDP1     | predicted |
| CID558221  | SMN1     | predicted |
| CID558221  | KMT2A    | predicted |
| CID558221  | ALOX5    | predicted |
| CID558221  | RAB9A    | predicted |
| CID5315469 | ACHE     | predicted |
| CID5315469 | LMNA     | predicted |
| CID5315469 | MAPT     | predicted |
| CID5315469 | CYP3A4   | predicted |
| CID5315469 | CYP2A6   | predicted |
| CID5315469 | PTPN1    | predicted |
| CID5315469 | TSHR     | predicted |
| CID5315469 | CYP19A1  | predicted |
| CID5315469 | ALDH1A1  | predicted |
| CID5315469 | TDP1     | predicted |
| CID5315469 | CNR2     | predicted |
| CID5315469 | SMN1     | predicted |
| CID5315469 | CNR1     | predicted |
| CID5315469 | KMT2A    | predicted |
| CID5315469 | PPARG    | predicted |
| CID5315469 | ALOX15   | predicted |
| CID5315469 | PTGS1    | predicted |
| CID5315469 | RAB9A    | predicted |
| CID5315469 | TP53     | predicted |
| CID5315469 | MAPK1    | predicted |
| CID440936  | LMNA     | predicted |
| CID440936  | IL2      | predicted |
| CID440936  | CYP3A4   | predicted |
| CID440936  | RAB9A    | predicted |
| CID440936  | MAPT     | predicted |
| CID440936  | AKR1B1   | predicted |
| CID440936  | TDP1     | predicted |
| CID440936  | NPC1     | predicted |
| CID440936  | HSP90AA1 | predicted |
| CID440936  | SMN1     | predicted |
| CID440936  | L3MBTL1  | predicted |
| CID440936  | POLB     | predicted |
| CID440936  | TSHR     | predicted |
| CID440936  | APEX1    | predicted |
| CID440936  | PSIP1    | predicted |
| CID440936  | TNF      | predicted |
| CID440936  | ABCG2    | predicted |
| CID440936  | BACE1    | predicted |
| CID440936  | GAA      | predicted |
| CID440936  | CYP19A1  | predicted |
| CID5352479 | ACHE     | predicted |
| CID5352479 | CYP2A6   | predicted |
| CID5352479 | LMNA     | predicted |

|            |         |           |
|------------|---------|-----------|
| CID5352479 | CNR2    | predicted |
| CID5352479 | CNR1    | predicted |
| CID5352479 | TSHR    | predicted |
| CID5352479 | MAPT    | predicted |
| CID5352479 | CYP3A4  | predicted |
| CID5352479 | TYR     | predicted |
| CID5352479 | ALDH1A1 | predicted |
| CID5352479 | CYP19A1 | predicted |
| CID5352479 | TRPA1   | predicted |
| CID5352479 | PTPN1   | predicted |
| CID5352479 | PPARG   | predicted |
| CID5352479 | PTGS1   | predicted |
| CID5352479 | TDP1    | predicted |
| CID5352479 | KMT2A   | predicted |
| CID5352479 | SMN1    | predicted |
| CID5352479 | RAB9A   | predicted |
| CID5352479 | TAAR1   | predicted |
| CID12391   | TSHR    | predicted |
| CID12391   | MPEG1   | predicted |
| CID12391   | HMGCR   | predicted |
| CID12391   | FAAH    | predicted |
| CID12391   | ALOX5   | predicted |
| CID12391   | TRPV1   | predicted |
| CID12391   | LMNA    | predicted |
| CID12391   | CNR2    | predicted |
| CID12391   | CNR1    | predicted |
| CID12391   | FABP3   | predicted |
| CID12391   | FNTA    | predicted |
| CID12391   | PPARG   | predicted |
| CID12391   | PPARA   | predicted |
| CID12391   | CCR5    | predicted |
| CID12391   | PPARD   | predicted |
| CID12391   | MAPT    | predicted |
| CID12391   | SAE1    | predicted |
| CID12391   | SHBG    | predicted |
| CID12391   | ACHE    | predicted |
| CID12391   | PTPN1   | predicted |
| CID5280343 | CA5B    | predicted |
| CID5280343 | HDAC10  | predicted |
| CID5280343 | TDP1    | predicted |
| CID5280343 | CYP2C19 | predicted |
| CID5280343 | MMP12   | predicted |
| CID5280343 | MMP1    | predicted |
| CID5280343 | CA13    | predicted |
| CID5280343 | CDK5    | predicted |
| CID5280343 | ALDH1A1 | predicted |
| CID5280343 | LMNA    | predicted |
| CID5280343 | APEX1   | predicted |
| CID5280343 | HDAC3   | predicted |
| CID5280343 | HDAC1   | predicted |
| CID5280343 | PLK4    | predicted |
| CID5280343 | AGL     | predicted |
| CID5280343 | MMP8    | predicted |
| CID5280343 | ERBB2   | predicted |
| CID5280343 | HDAC8   | predicted |
| CID5280343 | THPO    | predicted |
| CID5280343 | HDAC2   | predicted |
| CID5280343 | ALK     | Known     |

|            |          |       |
|------------|----------|-------|
| CID5280343 | IGF1R    | Known |
| CID5280343 | PIM1     | Known |
| CID5280343 | AXL      | Known |
| CID5280343 | KDR      | Known |
| CID5280343 | AURKB    | Known |
| CID5280343 | CA12     | Known |
| CID5280343 | GLO1     | Known |
| CID5280343 | CA1      | Known |
| CID5280343 | CA9      | Known |
| CID5280343 | CA2      | Known |
| CID5280343 | CA7      | Known |
| CID5280343 | PLK1     | Known |
| CID5280343 | PTK2     | Known |
| CID5280343 | NEK2     | Known |
| CID5280343 | CA6      | Known |
| CID5280343 | MET      | Known |
| CID5280343 | CA4      | Known |
| CID5280343 | MAPK10   | Known |
| CID5280343 | CA14     | Known |
| CID5280343 | SRC      | Known |
| CID5280343 | CYP1A1   | Known |
| CID5280343 | CYP1B1   | Known |
| CID5280343 | NOX4     | Known |
| CID5280343 | CYP1A2   | Known |
| CID5280343 | AKT1     | Known |
| CID5280343 | NUAK1    | Known |
| CID5280343 | XDH      | Known |
| CID5280343 | F2       | Known |
| CID5280343 | MAOA     | Known |
| CID5280343 | CA5A     | Known |
| CID5280343 | CA3      | Known |
| CID5280343 | PLA2G1B  | Known |
| CID5280343 | ABCC1    | Known |
| CID5280343 | MAPK14   | Known |
| CID5280343 | ALOX15   | Known |
| CID5280343 | PYGL     | Known |
| CID5280343 | NEK6     | Known |
| CID5280343 | PKN1     | Known |
| CID5280343 | FLT3     | Known |
| CID5280343 | HSD17B10 | Known |
| CID5280343 | MAPT     | Known |
| CID5280343 | MMP3     | Known |
| CID5280343 | BACE1    | Known |
| CID5280343 | MMP9     | Known |
| CID5280343 | CYP3A4   | Known |
| CID5280343 | MMP13    | Known |
| CID5280343 | TP53     | Known |
| CID5280343 | ALOX12   | Known |
| CID5280343 | HPGD     | Known |
| CID5280343 | EGFR     | Known |
| CID5280343 | MMP2     | Known |
| CID5280343 | ABCB1    | Known |
| CID5280343 | ABCG2    | Known |
| CID5280343 | KDM4E    | Known |
| CID5280343 | RECQL    | Known |
| CID5280343 | GSK3B    | Known |
| CID5280343 | MPO      | Known |
| CID5280343 | CYP19A1  | Known |

|             |         |           |
|-------------|---------|-----------|
| CID5280343  | CYP2C9  | Known     |
| CID5280343  | CAMK2B  | Known     |
| CID5280343  | CCR4    | Known     |
| CID5280343  | CXCR1   | Known     |
| CID5280343  | CYP2C8  | Known     |
| CID5280343  | HSD17B2 | Known     |
| CID5280343  | ALOX5   | Known     |
| CID5280343  | PIK3R1  | Known     |
| CID5280343  | HIF1A   | Known     |
| CID5280343  | AKR1B1  | Known     |
| CID5280343  | CDK1    | Known     |
| CID5280343  | KMT2A   | Known     |
| CID5280343  | DRD4    | Known     |
| CID5280343  | TSHR    | Known     |
| CID5280343  | AVPR2   | Known     |
| CID5280343  | GPR35   | Known     |
| CID5280343  | NFKB1   | Known     |
| CID5280343  | STAT6   | Known     |
| CID5280343  | CSNK2A1 | Known     |
| CID5280343  | POLB    | Known     |
| CID5280343  | NPSR1   | Known     |
| CID46906036 | CA5B    | predicted |
| CID46906036 | HDAC10  | predicted |
| CID46906036 | TDP1    | predicted |
| CID46906036 | CYP2C19 | predicted |
| CID46906036 | MMP12   | predicted |
| CID46906036 | MMP1    | predicted |
| CID46906036 | CA13    | predicted |
| CID46906036 | CDK5    | predicted |
| CID46906036 | ALDH1A1 | predicted |
| CID46906036 | LMNA    | predicted |
| CID46906036 | APEX1   | predicted |
| CID46906036 | HDAC3   | predicted |
| CID46906036 | HDAC1   | predicted |
| CID46906036 | PLK4    | predicted |
| CID46906036 | AGL     | predicted |
| CID46906036 | MMP8    | predicted |
| CID46906036 | ERBB2   | predicted |
| CID46906036 | HDAC8   | predicted |
| CID46906036 | THPO    | predicted |
| CID46906036 | HDAC2   | predicted |
| CID46906036 | ALK     | Known     |
| CID46906036 | IGF1R   | Known     |
| CID46906036 | PIM1    | Known     |
| CID46906036 | AXL     | Known     |
| CID46906036 | KDR     | Known     |
| CID46906036 | AURKB   | Known     |
| CID46906036 | CA12    | Known     |
| CID46906036 | GLO1    | Known     |
| CID46906036 | CA1     | Known     |
| CID46906036 | CA9     | Known     |
| CID46906036 | CA2     | Known     |
| CID46906036 | CA7     | Known     |
| CID46906036 | PLK1    | Known     |
| CID46906036 | PTK2    | Known     |
| CID46906036 | NEK2    | Known     |
| CID46906036 | CA6     | Known     |
| CID46906036 | MET     | Known     |

|             |          |       |
|-------------|----------|-------|
| CID46906036 | CA4      | Known |
| CID46906036 | MAPK10   | Known |
| CID46906036 | CA14     | Known |
| CID46906036 | SRC      | Known |
| CID46906036 | CYP1A1   | Known |
| CID46906036 | CYP1B1   | Known |
| CID46906036 | NOX4     | Known |
| CID46906036 | CYP1A2   | Known |
| CID46906036 | AKT1     | Known |
| CID46906036 | NUAK1    | Known |
| CID46906036 | XDH      | Known |
| CID46906036 | F2       | Known |
| CID46906036 | MAOA     | Known |
| CID46906036 | CA5A     | Known |
| CID46906036 | CA3      | Known |
| CID46906036 | PLA2G1B  | Known |
| CID46906036 | ABCC1    | Known |
| CID46906036 | MAPK14   | Known |
| CID46906036 | ALOX15   | Known |
| CID46906036 | PYGL     | Known |
| CID46906036 | NEK6     | Known |
| CID46906036 | PKN1     | Known |
| CID46906036 | FLT3     | Known |
| CID46906036 | HSD17B10 | Known |
| CID46906036 | MAPT     | Known |
| CID46906036 | MMP3     | Known |
| CID46906036 | BACE1    | Known |
| CID46906036 | MMP9     | Known |
| CID46906036 | CYP3A4   | Known |
| CID46906036 | MMP13    | Known |
| CID46906036 | TP53     | Known |
| CID46906036 | ALOX12   | Known |
| CID46906036 | HPGD     | Known |
| CID46906036 | EGFR     | Known |
| CID46906036 | MMP2     | Known |
| CID46906036 | ABCB1    | Known |
| CID46906036 | ABCG2    | Known |
| CID46906036 | KDM4E    | Known |
| CID46906036 | RECQL    | Known |
| CID46906036 | GSK3B    | Known |
| CID46906036 | MPO      | Known |
| CID46906036 | CYP19A1  | Known |
| CID46906036 | CYP2C9   | Known |
| CID46906036 | CAMK2B   | Known |
| CID46906036 | CCR4     | Known |
| CID46906036 | CXCR1    | Known |
| CID46906036 | CYP2C8   | Known |
| CID46906036 | HSD17B2  | Known |
| CID46906036 | ALOX5    | Known |
| CID46906036 | PIK3R1   | Known |
| CID46906036 | HIF1A    | Known |
| CID46906036 | AKR1B1   | Known |
| CID46906036 | CDK1     | Known |
| CID46906036 | KMT2A    | Known |
| CID46906036 | DRD4     | Known |
| CID46906036 | TSHR     | Known |
| CID46906036 | AVPR2    | Known |
| CID46906036 | GPR35    | Known |

|             |         |           |
|-------------|---------|-----------|
| CID46906036 | NFKB1   | Known     |
| CID46906036 | STAT6   | Known     |
| CID46906036 | CSNK2A1 | Known     |
| CID46906036 | POLB    | Known     |
| CID46906036 | NPSR1   | Known     |
| CID5315832  | LMNA    | predicted |
| CID5315832  | MAPT    | predicted |
| CID5315832  | CYP3A4  | predicted |
| CID5315832  | PTPN1   | predicted |
| CID5315832  | AKR1B10 | predicted |
| CID5315832  | SMN1    | predicted |
| CID5315832  | TSHR    | predicted |
| CID5315832  | TDP1    | predicted |
| CID5315832  | RAB9A   | predicted |
| CID5315832  | AKR1B1  | predicted |
| CID5315832  | NPC1    | predicted |
| CID5315832  | KMT2A   | predicted |
| CID5315832  | TP53    | predicted |
| CID5315832  | CYP19A1 | predicted |
| CID5315832  | KDM4E   | predicted |
| CID5315832  | ALDH1A1 | predicted |
| CID5315832  | CA9     | predicted |
| CID5315832  | NFKB1   | predicted |
| CID5315832  | CA1     | predicted |
| CID5315832  | POLB    | predicted |
| CID5293655  | CYP3A4  | predicted |
| CID5293655  | MAPT    | predicted |
| CID5293655  | LMNA    | predicted |
| CID5293655  | AKR1B1  | predicted |
| CID5293655  | TDP1    | predicted |
| CID5293655  | POLB    | predicted |
| CID5293655  | RAB9A   | predicted |
| CID5293655  | APEX1   | predicted |
| CID5293655  | NPC1    | predicted |
| CID5293655  | GAA     | predicted |
| CID5293655  | SMN1    | predicted |
| CID5293655  | IL2     | predicted |
| CID5293655  | CYP19A1 | predicted |
| CID5293655  | ABCG2   | predicted |
| CID5293655  | KDM4E   | predicted |
| CID5293655  | TSHR    | predicted |
| CID5293655  | PDE5A   | predicted |
| CID5293655  | PTPN1   | predicted |
| CID5293655  | ALOX15  | predicted |
| CID5293655  | L3MBTL1 | predicted |
| CID5378597  | MAPT    | predicted |
| CID5378597  | CYP3A4  | predicted |
| CID5378597  | ABCG2   | predicted |
| CID5378597  | RAB9A   | predicted |
| CID5378597  | TDP1    | predicted |
| CID5378597  | CYP19A1 | predicted |
| CID5378597  | AKR1B1  | predicted |
| CID5378597  | LMNA    | predicted |
| CID5378597  | NPC1    | predicted |
| CID5378597  | POLB    | predicted |
| CID5378597  | APEX1   | predicted |
| CID5378597  | KDM4E   | predicted |
| CID5378597  | GAA     | predicted |

|            |         |           |
|------------|---------|-----------|
| CID5378597 | BACE1   | predicted |
| CID5378597 | IL2     | predicted |
| CID5378597 | SMN1    | predicted |
| CID5378597 | MAPK1   | predicted |
| CID5378597 | KMT2A   | predicted |
| CID5378597 | PTPN1   | predicted |
| CID5378597 | ALOX15  | predicted |
| CID5315454 | LMNA    | predicted |
| CID5315454 | TSHR    | predicted |
| CID5315454 | MAPT    | predicted |
| CID5315454 | MAP2K1  | predicted |
| CID5315454 | CNR2    | predicted |
| CID5315454 | CNR1    | predicted |
| CID5315454 | CYP3A4  | predicted |
| CID5315454 | HTR2C   | predicted |
| CID5315454 | ALDH1A1 | predicted |
| CID5315454 | HTR2B   | predicted |
| CID5315454 | MAOA    | predicted |
| CID5315454 | SLCO1B3 | predicted |
| CID5315454 | TP53    | predicted |
| CID5315454 | KMT2A   | predicted |
| CID5315454 | SLCO1B1 | predicted |
| CID5315454 | SMN1    | predicted |
| CID5315454 | TRPV1   | predicted |
| CID5315454 | RAB9A   | predicted |
| CID5315454 | MAPK1   | predicted |
| CID5315454 | NPSR1   | predicted |
| CID7173555 | PTPN1   | predicted |
| CID7173555 | LMNA    | predicted |
| CID7173555 | GPBAR1  | predicted |
| CID7173555 | TSHR    | predicted |
| CID7173555 | MAPT    | predicted |
| CID7173555 | HSD11B1 | predicted |
| CID7173555 | CYP3A4  | predicted |
| CID7173555 | HMGCR   | predicted |
| CID7173555 | RAB9A   | predicted |
| CID7173555 | SMN1    | predicted |
| CID7173555 | SHBG    | predicted |
| CID7173555 | TDP1    | predicted |
| CID7173555 | AKR1B10 | predicted |
| CID7173555 | CYP19A1 | predicted |
| CID7173555 | PPARG   | predicted |
| CID7173555 | NPC1    | predicted |
| CID7173555 | TNF     | predicted |
| CID7173555 | SLCO1B3 | predicted |
| CID7173555 | SLCO1B1 | predicted |
| CID7173555 | NPSR1   | predicted |
| CID221493  | PTPN1   | predicted |
| CID221493  | LMNA    | predicted |
| CID221493  | GPBAR1  | predicted |
| CID221493  | TSHR    | predicted |
| CID221493  | MAPT    | predicted |
| CID221493  | HSD11B1 | predicted |
| CID221493  | CYP3A4  | predicted |
| CID221493  | HMGCR   | predicted |
| CID221493  | RAB9A   | predicted |
| CID221493  | SMN1    | predicted |
| CID221493  | SHBG    | predicted |



|            |         |           |
|------------|---------|-----------|
| CID221493  | TDP1    | predicted |
| CID221493  | AKR1B10 | predicted |
| CID221493  | CYP19A1 | predicted |
| CID221493  | PPARG   | predicted |
| CID221493  | NPC1    | predicted |
| CID221493  | TNF     | predicted |
| CID221493  | SLCO1B3 | predicted |
| CID221493  | SLCO1B1 | predicted |
| CID221493  | NPSR1   | predicted |
| CID222528  | PTPN1   | predicted |
| CID222528  | LMNA    | predicted |
| CID222528  | GPBAR1  | predicted |
| CID222528  | TSHR    | predicted |
| CID222528  | MAPT    | predicted |
| CID222528  | HSD11B1 | predicted |
| CID222528  | CYP3A4  | predicted |
| CID222528  | HMGCR   | predicted |
| CID222528  | RAB9A   | predicted |
| CID222528  | SMN1    | predicted |
| CID222528  | SHBG    | predicted |
| CID222528  | TDP1    | predicted |
| CID222528  | AKR1B10 | predicted |
| CID222528  | CYP19A1 | predicted |
| CID222528  | PPARG   | predicted |
| CID222528  | NPC1    | predicted |
| CID222528  | TNF     | predicted |
| CID222528  | SLCO1B3 | predicted |
| CID222528  | SLCO1B1 | predicted |
| CID222528  | NPSR1   | predicted |
| CID9903    | PTPN1   | predicted |
| CID9903    | LMNA    | predicted |
| CID9903    | GPBAR1  | predicted |
| CID9903    | TSHR    | predicted |
| CID9903    | MAPT    | predicted |
| CID9903    | HSD11B1 | predicted |
| CID9903    | HMGCR   | predicted |
| CID9903    | CYP3A4  | predicted |
| CID9903    | SMN1    | predicted |
| CID9903    | SHBG    | predicted |
| CID9903    | RAB9A   | predicted |
| CID9903    | TDP1    | predicted |
| CID9903    | CYP19A1 | predicted |
| CID9903    | PPARG   | predicted |
| CID9903    | AKR1B10 | predicted |
| CID9903    | TNF     | predicted |
| CID9903    | NPC1    | predicted |
| CID9903    | SLCO1B3 | predicted |
| CID9903    | SLCO1B1 | predicted |
| CID9903    | MAPK1   | predicted |
| CID5799469 | LMNA    | predicted |
| CID5799469 | TSHR    | predicted |
| CID5799469 | MAPT    | predicted |
| CID5799469 | MAP2K1  | predicted |
| CID5799469 | CNR2    | predicted |
| CID5799469 | CNR1    | predicted |
| CID5799469 | CYP3A4  | predicted |
| CID5799469 | HTR2C   | predicted |
| CID5799469 | ALDH1A1 | predicted |

|            |         |           |
|------------|---------|-----------|
| CID5799469 | HTR2B   | predicted |
| CID5799469 | MAOA    | predicted |
| CID5799469 | SLCO1B3 | predicted |
| CID5799469 | TP53    | predicted |
| CID5799469 | KMT2A   | predicted |
| CID5799469 | SLCO1B1 | predicted |
| CID5799469 | SMN1    | predicted |
| CID5799469 | TRPV1   | predicted |
| CID5799469 | RAB9A   | predicted |
| CID5799469 | MAPK1   | predicted |
| CID5799469 | NPSR1   | predicted |
| CID3493    | LMNA    | predicted |
| CID3493    | CNR1    | predicted |
| CID3493    | PTPN1   | predicted |
| CID3493    | GPBAR1  | predicted |
| CID3493    | TSHR    | predicted |
| CID3493    | CYP3A4  | predicted |
| CID3493    | MAPT    | predicted |
| CID3493    | RAB9A   | predicted |
| CID3493    | CNR2    | predicted |
| CID3493    | TRPV1   | predicted |
| CID3493    | NPC1    | predicted |
| CID3493    | SMN1    | predicted |
| CID3493    | GSTK1   | predicted |
| CID3493    | ALDH1A1 | predicted |
| CID3493    | TDP1    | predicted |
| CID3493    | CYP2C19 | predicted |
| CID3493    | KMT2A   | predicted |
| CID3493    | MAPK1   | predicted |
| CID3493    | CYP2D6  | predicted |
| CID3493    | SHBG    | predicted |
| CID277782  | LMNA    | predicted |
| CID277782  | PTPN1   | predicted |
| CID277782  | TSHR    | predicted |
| CID277782  | GPBAR1  | predicted |
| CID277782  | MAPT    | predicted |
| CID277782  | CYP3A4  | predicted |
| CID277782  | RAB9A   | predicted |
| CID277782  | SMN1    | predicted |
| CID277782  | HSD11B1 | predicted |
| CID277782  | TDP1    | predicted |
| CID277782  | NPC1    | predicted |
| CID277782  | SHBG    | predicted |
| CID277782  | CYP19A1 | predicted |
| CID277782  | AKR1B10 | predicted |
| CID277782  | ALDH1A1 | predicted |
| CID277782  | KMT2A   | predicted |
| CID277782  | SLCO1B3 | predicted |
| CID277782  | SLCO1B1 | predicted |
| CID277782  | PPARG   | predicted |
| CID277782  | ACHE    | predicted |
| CID95608   | LMNA    | predicted |
| CID95608   | PTPN1   | predicted |
| CID95608   | TSHR    | predicted |
| CID95608   | GPBAR1  | predicted |
| CID95608   | MAPT    | predicted |
| CID95608   | CYP3A4  | predicted |
| CID95608   | RAB9A   | predicted |

|            |         |           |
|------------|---------|-----------|
| CID95608   | SMN1    | predicted |
| CID95608   | HSD11B1 | predicted |
| CID95608   | TDP1    | predicted |
| CID95608   | NPC1    | predicted |
| CID95608   | SHBG    | predicted |
| CID95608   | CYP19A1 | predicted |
| CID95608   | AKR1B10 | predicted |
| CID95608   | ALDH1A1 | predicted |
| CID95608   | KMT2A   | predicted |
| CID95608   | SLCO1B3 | predicted |
| CID95608   | SLCO1B1 | predicted |
| CID95608   | PPARG   | predicted |
| CID95608   | ACHE    | predicted |
| CID3724653 | LMNA    | predicted |
| CID3724653 | BLM     | predicted |
| CID3724653 | PTPN1   | predicted |
| CID3724653 | CNR1    | predicted |
| CID3724653 | GPBAR1  | predicted |
| CID3724653 | TSHR    | predicted |
| CID3724653 | HDAC11  | predicted |
| CID3724653 | CNR2    | predicted |
| CID3724653 | TRPV1   | predicted |
| CID3724653 | TRPA1   | predicted |
| CID3724653 | CYP3A4  | predicted |
| CID3724653 | MAPT    | predicted |
| CID3724653 | ALDH1A1 | predicted |
| CID3724653 | NT5E    | predicted |
| CID3724653 | TP53    | predicted |
| CID3724653 | RAB9A   | predicted |
| CID3724653 | MIF     | predicted |
| CID3724653 | SMN1    | predicted |
| CID3724653 | NPC1    | predicted |
| CID3724653 | CTSB    | predicted |
| CID5247    | LMNA    | predicted |
| CID5247    | BLM     | predicted |
| CID5247    | PTPN1   | predicted |
| CID5247    | CNR1    | predicted |
| CID5247    | GPBAR1  | predicted |
| CID5247    | TSHR    | predicted |
| CID5247    | HDAC11  | predicted |
| CID5247    | CNR2    | predicted |
| CID5247    | TRPV1   | predicted |
| CID5247    | TRPA1   | predicted |
| CID5247    | CYP3A4  | predicted |
| CID5247    | MAPT    | predicted |
| CID5247    | ALDH1A1 | predicted |
| CID5247    | NT5E    | predicted |
| CID5247    | TP53    | predicted |
| CID5247    | RAB9A   | predicted |
| CID5247    | MIF     | predicted |
| CID5247    | SMN1    | predicted |
| CID5247    | NPC1    | predicted |
| CID5247    | CTSB    | predicted |
| CID5315819 | MAPT    | predicted |
| CID5315819 | PARP1   | predicted |
| CID5315819 | CYP3A4  | predicted |
| CID5315819 | LMNA    | predicted |
| CID5315819 | MAOA    | predicted |

|            |         |           |
|------------|---------|-----------|
| CID5315819 | HPRT1   | predicted |
| CID5315819 | ALDH1A1 | predicted |
| CID5315819 | ABCG2   | predicted |
| CID5315819 | ACHE    | predicted |
| CID5315819 | SMN1    | predicted |
| CID5315819 | GDA     | predicted |
| CID5315819 | TSHR    | predicted |
| CID5315819 | KMT2A   | predicted |
| CID5315819 | MAPK1   | predicted |
| CID5315819 | KDM4E   | predicted |
| CID5315819 | RAB9A   | predicted |
| CID5315819 | TDP1    | predicted |
| CID5315819 | NPC1    | predicted |
| CID5315819 | CAPN1   | predicted |
| CID5315819 | CYP2C19 | predicted |
| CID632846  | LMNA    | predicted |
| CID632846  | PTPN1   | predicted |
| CID632846  | TSHR    | predicted |
| CID632846  | GPBAR1  | predicted |
| CID632846  | MAPT    | predicted |
| CID632846  | CYP3A4  | predicted |
| CID632846  | RAB9A   | predicted |
| CID632846  | SMN1    | predicted |
| CID632846  | HSD11B1 | predicted |
| CID632846  | TDP1    | predicted |
| CID632846  | NPC1    | predicted |
| CID632846  | SHBG    | predicted |
| CID632846  | CYP19A1 | predicted |
| CID632846  | AKR1B10 | predicted |
| CID632846  | ALDH1A1 | predicted |
| CID632846  | KMT2A   | predicted |
| CID632846  | SLCO1B3 | predicted |
| CID632846  | SLCO1B1 | predicted |
| CID632846  | PPARG   | predicted |
| CID632846  | ACHE    | predicted |
| CID2987    | PTPN1   | predicted |
| CID2987    | LMNA    | predicted |
| CID2987    | GPBAR1  | predicted |
| CID2987    | TSHR    | predicted |
| CID2987    | MAPT    | predicted |
| CID2987    | HSD11B1 | predicted |
| CID2987    | CYP3A4  | predicted |
| CID2987    | HMGCR   | predicted |
| CID2987    | RAB9A   | predicted |
| CID2987    | SMN1    | predicted |
| CID2987    | SHBG    | predicted |
| CID2987    | TDP1    | predicted |
| CID2987    | AKR1B10 | predicted |
| CID2987    | CYP19A1 | predicted |
| CID2987    | PPARG   | predicted |
| CID2987    | NPC1    | predicted |
| CID2987    | TNF     | predicted |
| CID2987    | SLCO1B3 | predicted |
| CID2987    | SLCO1B1 | predicted |
| CID2987    | NPSR1   | predicted |
| CID259323  | LMNA    | predicted |
| CID259323  | GSTK1   | predicted |
| CID259323  | CYP3A4  | predicted |

|            |          |           |
|------------|----------|-----------|
| CID259323  | TSHR     | predicted |
| CID259323  | MAPT     | predicted |
| CID259323  | CNR2     | predicted |
| CID259323  | HSD17B10 | predicted |
| CID259323  | CNR1     | predicted |
| CID259323  | RAB9A    | predicted |
| CID259323  | TAAR1    | predicted |
| CID259323  | CYP19A1  | predicted |
| CID259323  | NPC1     | predicted |
| CID259323  | BLM      | predicted |
| CID259323  | HTR2C    | predicted |
| CID259323  | CA5A     | predicted |
| CID259323  | CA5B     | predicted |
| CID259323  | KMT2A    | predicted |
| CID259323  | ADSS     | predicted |
| CID259323  | TDP1     | predicted |
| CID259323  | SMN1     | predicted |
| CID303     | PTPN1    | predicted |
| CID303     | LMNA     | predicted |
| CID303     | GPBAR1   | predicted |
| CID303     | TSHR     | predicted |
| CID303     | MAPT     | predicted |
| CID303     | HSD11B1  | predicted |
| CID303     | CYP3A4   | predicted |
| CID303     | HMGCR    | predicted |
| CID303     | RAB9A    | predicted |
| CID303     | SMN1     | predicted |
| CID303     | SHBG     | predicted |
| CID303     | TDP1     | predicted |
| CID303     | AKR1B10  | predicted |
| CID303     | CYP19A1  | predicted |
| CID303     | PPARG    | predicted |
| CID303     | NPC1     | predicted |
| CID303     | TNF      | predicted |
| CID303     | SLCO1B3  | predicted |
| CID303     | SLCO1B1  | predicted |
| CID303     | NPSR1    | predicted |
| CID500165  | PTPN1    | predicted |
| CID500165  | LMNA     | predicted |
| CID500165  | GPBAR1   | predicted |
| CID500165  | TSHR     | predicted |
| CID500165  | MAPT     | predicted |
| CID500165  | HSD11B1  | predicted |
| CID500165  | HMGCR    | predicted |
| CID500165  | CYP3A4   | predicted |
| CID500165  | SMN1     | predicted |
| CID500165  | SHBG     | predicted |
| CID500165  | RAB9A    | predicted |
| CID500165  | TDP1     | predicted |
| CID500165  | CYP19A1  | predicted |
| CID500165  | PPARG    | predicted |
| CID500165  | AKR1B10  | predicted |
| CID500165  | TNF      | predicted |
| CID500165  | NPC1     | predicted |
| CID500165  | SLCO1B3  | predicted |
| CID500165  | SLCO1B1  | predicted |
| CID500165  | MAPK1    | predicted |
| CID5353439 | LMNA     | predicted |

|            |         |           |
|------------|---------|-----------|
| CID5353439 | MAPT    | predicted |
| CID5353439 | TSHR    | predicted |
| CID5353439 | MAP2K1  | predicted |
| CID5353439 | CNR2    | predicted |
| CID5353439 | CYP3A4  | predicted |
| CID5353439 | ALDH1A1 | predicted |
| CID5353439 | CNR1    | predicted |
| CID5353439 | HTR2C   | predicted |
| CID5353439 | ACHE    | predicted |
| CID5353439 | SMN1    | predicted |
| CID5353439 | KMT2A   | predicted |
| CID5353439 | MAOA    | predicted |
| CID5353439 | HTR2B   | predicted |
| CID5353439 | PTPN1   | predicted |
| CID5353439 | SLCO1B3 | predicted |
| CID5353439 | HMGCR   | predicted |
| CID5353439 | RAB9A   | predicted |
| CID5353439 | MAPK1   | predicted |
| CID5353439 | SLCO1B1 | predicted |
| CID6474108 | LMNA    | predicted |
| CID6474108 | TSHR    | predicted |
| CID6474108 | MAPT    | predicted |
| CID6474108 | CYP3A4  | predicted |
| CID6474108 | CNR2    | predicted |
| CID6474108 | CNR1    | predicted |
| CID6474108 | PTPN1   | predicted |
| CID6474108 | ALDH1A1 | predicted |
| CID6474108 | SMN1    | predicted |
| CID6474108 | HMGCR   | predicted |
| CID6474108 | HTR2C   | predicted |
| CID6474108 | ACHE    | predicted |
| CID6474108 | KMT2A   | predicted |
| CID6474108 | RAB9A   | predicted |
| CID6474108 | TRPV1   | predicted |
| CID6474108 | MAOA    | predicted |
| CID6474108 | PPARG   | predicted |
| CID6474108 | MAPK1   | predicted |
| CID6474108 | TP53    | predicted |
| CID6474108 | HTR2B   | predicted |
| CID5280352 | SLCO2B1 | predicted |
| CID5280352 | MITF    | predicted |
| CID5280352 | HPGD    | predicted |
| CID5280352 | CYP3A4  | predicted |
| CID5280352 | RAB9A   | predicted |
| CID5280352 | KMT2A   | predicted |
| CID5280352 | NPC1    | predicted |
| CID5280352 | USP2    | predicted |
| CID5280352 | LMNA    | predicted |
| CID5280352 | ACE     | predicted |
| CID5280352 | TDP1    | predicted |
| CID5280352 | ALDH1A1 | predicted |
| CID5280352 | TP53    | predicted |
| CID5280352 | CYP2C9  | predicted |
| CID5280352 | TBXAS1  | predicted |
| CID5280352 | RECQL   | predicted |
| CID5280352 | ALOX12  | predicted |
| CID5280352 | ALOX15  | predicted |
| CID5280352 | FABP4   | predicted |

|             |          |           |
|-------------|----------|-----------|
| CID5280352  | AGTR1    | predicted |
| CID5280352  | SLCO1B3  | Known     |
| CID5280352  | SLCO1B1  | Known     |
| CID5280352  | MAPT     | Known     |
| CID71816152 | LMNA     | predicted |
| CID71816152 | MAPT     | predicted |
| CID71816152 | CYP3A4   | predicted |
| CID71816152 | PTPN1    | predicted |
| CID71816152 | TSHR     | predicted |
| CID71816152 | RAB9A    | predicted |
| CID71816152 | SMN1     | predicted |
| CID71816152 | IL2      | predicted |
| CID71816152 | TDP1     | predicted |
| CID71816152 | AKR1B1   | predicted |
| CID71816152 | NPC1     | predicted |
| CID71816152 | HSP90AA1 | predicted |
| CID71816152 | L3MBTL1  | predicted |
| CID71816152 | TNF      | predicted |
| CID71816152 | CYP19A1  | predicted |
| CID71816152 | POLB     | predicted |
| CID71816152 | ABCG2    | predicted |
| CID71816152 | ALOX5    | predicted |
| CID71816152 | ALDH1A1  | predicted |
| CID71816152 | KDM4E    | predicted |
| CID72322    | CYP3A4   | predicted |
| CID72322    | MAPT     | predicted |
| CID72322    | ACHE     | predicted |
| CID72322    | LMNA     | predicted |
| CID72322    | SMN1     | predicted |
| CID72322    | F3       | predicted |
| CID72322    | DRD1     | predicted |
| CID72322    | CYP2C19  | predicted |
| CID72322    | NPC1     | predicted |
| CID72322    | RAB9A    | predicted |
| CID72322    | CYP2D6   | predicted |
| CID72322    | TP53     | predicted |
| CID72322    | UBE2I    | predicted |
| CID72322    | TDP1     | predicted |
| CID72322    | KDM4E    | predicted |
| CID72322    | SENP8    | predicted |
| CID72322    | ABCG2    | predicted |
| CID72322    | GAA      | predicted |
| CID72322    | TSHR     | predicted |
| CID72322    | DRD2     | predicted |
| CID5281703  | MAPT     | predicted |
| CID5281703  | CYP3A4   | predicted |
| CID5281703  | ABCG2    | predicted |
| CID5281703  | LMNA     | predicted |
| CID5281703  | ALDH1A1  | predicted |
| CID5281703  | TSHR     | predicted |
| CID5281703  | RAB9A    | predicted |
| CID5281703  | TP53     | predicted |
| CID5281703  | NPC1     | predicted |
| CID5281703  | CYP19A1  | predicted |
| CID5281703  | MAOA     | predicted |
| CID5281703  | CA9      | predicted |
| CID5281703  | KDM4E    | predicted |
| CID5281703  | CA12     | predicted |

|            |         |           |
|------------|---------|-----------|
| CID5281703 | TDP1    | predicted |
| CID5281703 | BACE1   | predicted |
| CID5281703 | KMT2A   | predicted |
| CID5281703 | ABCB1   | predicted |
| CID5281703 | CA1     | predicted |
| CID5281703 | CYP2C19 | predicted |
| CID160876  | MCL1    | predicted |
| CID160876  | POLB    | predicted |
| CID160876  | CDK5R1  | predicted |
| CID160876  | APEX1   | predicted |
| CID160876  | KAT2B   | predicted |
| CID160876  | PKM     | predicted |
| CID160876  | PSIP1   | predicted |
| CID160876  | BLM     | predicted |
| CID160876  | EP300   | predicted |
| CID160876  | NPC1    | predicted |
| CID160876  | ALOX15  | predicted |
| CID160876  | GPBAR1  | predicted |
| CID160876  | AKR1B10 | predicted |
| CID160876  | TSHR    | predicted |
| CID160876  | GPR35   | predicted |
| CID160876  | L3MBTL1 | predicted |
| CID160876  | RECQL   | predicted |
| CID160876  | SLCO1B3 | predicted |
| CID160876  | SLCO1B1 | predicted |
| CID160876  | TDP1    | predicted |
| CID160876  | UBE2I   | Known     |
| CID160876  | SAE1    | Known     |
| CID160876  | LMNA    | Known     |
| CID624491  | DRD1    | predicted |
| CID624491  | DRD2    | predicted |
| CID624491  | CYP3A4  | predicted |
| CID624491  | MAPT    | predicted |
| CID624491  | F3      | predicted |
| CID624491  | LMNA    | predicted |
| CID624491  | CYP2D6  | predicted |
| CID624491  | ALDH1A1 | predicted |
| CID624491  | CYP2C19 | predicted |
| CID624491  | ACHE    | predicted |
| CID624491  | TSHR    | predicted |
| CID624491  | TDP1    | predicted |
| CID624491  | NPC1    | predicted |
| CID624491  | RAB9A   | predicted |
| CID624491  | MAOA    | predicted |
| CID624491  | TAAR1   | predicted |
| CID624491  | MAPK1   | predicted |
| CID624491  | SMN1    | predicted |
| CID624491  | ABCG2   | predicted |
| CID624491  | HTR1A   | predicted |
| CID624491  | PTPRCAP | Known     |
| CID5318276 | CYP3A4  | predicted |
| CID5318276 | LMNA    | predicted |
| CID5318276 | MAPT    | predicted |
| CID5318276 | TDP1    | predicted |
| CID5318276 | TSHR    | predicted |
| CID5318276 | CYP19A1 | predicted |
| CID5318276 | PTPN1   | predicted |
| CID5318276 | RAB9A   | predicted |



|            |         |           |
|------------|---------|-----------|
| CID5318276 | MAPK1   | predicted |
| CID5318276 | AKT1    | predicted |
| CID5318276 | ACHE    | predicted |
| CID5318276 | SMN1    | predicted |
| CID5318276 | NPC1    | predicted |
| CID5318276 | ALOX15  | predicted |
| CID5318276 | ALDH1A1 | predicted |
| CID5318276 | ABCG2   | predicted |
| CID5318276 | TRPV1   | predicted |
| CID5318276 | KDM4E   | predicted |
| CID5318276 | ALOX5   | predicted |
| CID5318276 | BACE1   | predicted |
| CID5320351 | ABCG2   | predicted |
| CID5320351 | CYP3A4  | predicted |
| CID5320351 | MAPT    | predicted |
| CID5320351 | ABCB1   | predicted |
| CID5320351 | RAB9A   | predicted |
| CID5320351 | NPC1    | predicted |
| CID5320351 | KMT2A   | predicted |
| CID5320351 | CYP19A1 | predicted |
| CID5320351 | MAPK1   | predicted |
| CID5320351 | BACE1   | predicted |
| CID5320351 | MAOA    | predicted |
| CID5320351 | KDM4E   | predicted |
| CID5320351 | TDP1    | predicted |
| CID5320351 | TP53    | predicted |
| CID5320351 | ACHE    | predicted |
| CID5320351 | ALDH1A1 | predicted |
| CID5320351 | LMNA    | predicted |
| CID5320351 | SMN1    | predicted |
| CID5320351 | ALOX15  | predicted |
| CID5320351 | CA9     | predicted |
| CID5281988 | PTPN1   | predicted |
| CID5281988 | LMNA    | predicted |
| CID5281988 | MAPT    | predicted |
| CID5281988 | CYP3A4  | predicted |
| CID5281988 | GPBAR1  | predicted |
| CID5281988 | TSHR    | predicted |
| CID5281988 | RAB9A   | predicted |
| CID5281988 | SMN1    | predicted |
| CID5281988 | TNF     | predicted |
| CID5281988 | HSD11B1 | predicted |
| CID5281988 | NPC1    | predicted |
| CID5281988 | AKR1B10 | predicted |
| CID5281988 | TDP1    | predicted |
| CID5281988 | NPSR1   | predicted |
| CID5281988 | SHBG    | predicted |
| CID5281988 | KMT2A   | predicted |
| CID5281988 | CYP19A1 | predicted |
| CID5281988 | HTT     | predicted |
| CID5281988 | HMGCR   | predicted |
| CID5281988 | ALDH1A1 | predicted |
| CID5280607 | PTPN1   | predicted |
| CID5280607 | LMNA    | predicted |
| CID5280607 | GPBAR1  | predicted |
| CID5280607 | MAPT    | predicted |
| CID5280607 | CYP3A4  | predicted |
| CID5280607 | SMN1    | predicted |

|            |          |           |
|------------|----------|-----------|
| CID5280607 | RAB9A    | predicted |
| CID5280607 | TSHR     | predicted |
| CID5280607 | HSD11B1  | predicted |
| CID5280607 | TNF      | predicted |
| CID5280607 | AKR1B10  | predicted |
| CID5280607 | NPC1     | predicted |
| CID5280607 | TDP1     | predicted |
| CID5280607 | SHBG     | predicted |
| CID5280607 | NPSR1    | predicted |
| CID5280607 | HTT      | predicted |
| CID5280607 | CYP19A1  | predicted |
| CID5280607 | KMT2A    | predicted |
| CID5280607 | HSP90AA1 | predicted |
| CID5280607 | TP53     | predicted |
| CID5316018 | CYP3A4   | predicted |
| CID5316018 | MAPT     | predicted |
| CID5316018 | LMNA     | predicted |
| CID5316018 | SMN1     | predicted |
| CID5316018 | CYP19A1  | predicted |
| CID5316018 | PTPN1    | predicted |
| CID5316018 | TSHR     | predicted |
| CID5316018 | RAB9A    | predicted |
| CID5316018 | KMT2A    | predicted |
| CID5316018 | TDP1     | predicted |
| CID5316018 | ALDH1A1  | predicted |
| CID5316018 | NPC1     | predicted |
| CID5316018 | L3MBTL1  | predicted |
| CID5316018 | TP53     | predicted |
| CID5316018 | BACE1    | predicted |
| CID5316018 | CA9      | predicted |
| CID5316018 | PDE4D    | predicted |
| CID5316018 | ACHE     | predicted |
| CID5316018 | KDM4E    | predicted |
| CID5316018 | ABCG2    | predicted |
| CID5315691 | IDO1     | predicted |
| CID5315691 | MAPT     | predicted |
| CID5315691 | LMNA     | predicted |
| CID5315691 | PTPN1    | predicted |
| CID5315691 | CYP3A4   | predicted |
| CID5315691 | SMN1     | predicted |
| CID5315691 | TSHR     | predicted |
| CID5315691 | TDP1     | predicted |
| CID5315691 | KMT2A    | predicted |
| CID5315691 | MAPK1    | predicted |
| CID5315691 | RAB9A    | predicted |
| CID5315691 | CYP19A1  | predicted |
| CID5315691 | ALDH1A1  | predicted |
| CID5315691 | NPC1     | predicted |
| CID5315691 | TP53     | predicted |
| CID5315691 | KDM4E    | predicted |
| CID5315691 | CDC25B   | predicted |
| CID5315691 | ABCG2    | predicted |
| CID5315691 | ACHE     | predicted |
| CID5315691 | POLB     | predicted |
| CID129974  | MAPT     | predicted |
| CID129974  | CYP3A4   | predicted |
| CID129974  | ABCG2    | predicted |
| CID129974  | CYP19A1  | predicted |

|            |         |           |
|------------|---------|-----------|
| CID129974  | KMT2A   | predicted |
| CID129974  | MAPK1   | predicted |
| CID129974  | MAOA    | predicted |
| CID129974  | TDP1    | predicted |
| CID129974  | IDO1    | predicted |
| CID129974  | RAB9A   | predicted |
| CID129974  | NPC1    | predicted |
| CID129974  | LMNA    | predicted |
| CID129974  | KDM4E   | predicted |
| CID129974  | TP53    | predicted |
| CID129974  | ALDH1A1 | predicted |
| CID129974  | RECQL   | predicted |
| CID129974  | BACE1   | predicted |
| CID129974  | SMN1    | predicted |
| CID129974  | ALOX15  | predicted |
| CID129974  | CYP2C19 | predicted |
| CID5321890 | CYP3A4  | predicted |
| CID5321890 | MAPT    | predicted |
| CID5321890 | LMNA    | predicted |
| CID5321890 | ABCG2   | predicted |
| CID5321890 | TDP1    | predicted |
| CID5321890 | BACE1   | predicted |
| CID5321890 | RAB9A   | predicted |
| CID5321890 | NPC1    | predicted |
| CID5321890 | SMN1    | predicted |
| CID5321890 | CYP19A1 | predicted |
| CID5321890 | ALDH1A1 | predicted |
| CID5321890 | KMT2A   | predicted |
| CID5321890 | KDM4E   | predicted |
| CID5321890 | AKR1B1  | predicted |
| CID5321890 | POLB    | predicted |
| CID5321890 | MAOA    | predicted |
| CID5321890 | MAPK1   | predicted |
| CID5321890 | APEX1   | predicted |
| CID5321890 | CA9     | predicted |
| CID5321890 | IL2     | predicted |
| CID5315183 | CYP3A4  | predicted |
| CID5315183 | MAPT    | predicted |
| CID5315183 | LMNA    | predicted |
| CID5315183 | ABCG2   | predicted |
| CID5315183 | TDP1    | predicted |
| CID5315183 | BACE1   | predicted |
| CID5315183 | RAB9A   | predicted |
| CID5315183 | NPC1    | predicted |
| CID5315183 | SMN1    | predicted |
| CID5315183 | CYP19A1 | predicted |
| CID5315183 | ALDH1A1 | predicted |
| CID5315183 | KMT2A   | predicted |
| CID5315183 | KDM4E   | predicted |
| CID5315183 | AKR1B1  | predicted |
| CID5315183 | POLB    | predicted |
| CID5315183 | MAOA    | predicted |
| CID5315183 | MAPK1   | predicted |
| CID5315183 | APEX1   | predicted |
| CID5315183 | CA9     | predicted |
| CID5315183 | IL2     | predicted |
| CID5315184 | CYP3A4  | predicted |
| CID5315184 | MAPT    | predicted |

|            |          |           |
|------------|----------|-----------|
| CID5315184 | LMNA     | predicted |
| CID5315184 | BACE1    | predicted |
| CID5315184 | ABCG2    | predicted |
| CID5315184 | TDP1     | predicted |
| CID5315184 | RAB9A    | predicted |
| CID5315184 | NPC1     | predicted |
| CID5315184 | SMN1     | predicted |
| CID5315184 | CYP19A1  | predicted |
| CID5315184 | KDM4E    | predicted |
| CID5315184 | AKR1B1   | predicted |
| CID5315184 | POLB     | predicted |
| CID5315184 | MAOA     | predicted |
| CID5315184 | ALDH1A1  | predicted |
| CID5315184 | APEX1    | predicted |
| CID5315184 | IL2      | predicted |
| CID5315184 | KMT2A    | predicted |
| CID5315184 | MAPK1    | predicted |
| CID5315184 | CA9      | predicted |
| CID5281691 | AKR1B10  | predicted |
| CID5281691 | TDP1     | predicted |
| CID5281691 | ALOX15   | predicted |
| CID5281691 | APEX1    | predicted |
| CID5281691 | KDM4E    | predicted |
| CID5281691 | HPGD     | predicted |
| CID5281691 | POLB     | predicted |
| CID5281691 | ALDH1A1  | predicted |
| CID5281691 | CYP3A4   | predicted |
| CID5281691 | BLM      | predicted |
| CID5281691 | HSD17B10 | predicted |
| CID5281691 | ALOX12   | predicted |
| CID5281691 | LMNA     | predicted |
| CID5281691 | GBA      | predicted |
| CID5281691 | KMT2A    | predicted |
| CID5281691 | TP53     | predicted |
| CID5281691 | GAA      | predicted |
| CID5281691 | NPC1     | predicted |
| CID5281691 | RAB9A    | predicted |
| CID5281691 | MAPK1    | predicted |
| CID5281691 | AKR1B1   | Known     |
| CID5281691 | RECQL    | Known     |
| CID5281691 | MAPT     | Known     |
| CID441562  | CTSV     | predicted |
| CID441562  | CA2      | predicted |
| CID441562  | CA1      | predicted |
| CID441562  | TSHR     | predicted |
| CID441562  | CA12     | predicted |
| CID441562  | MAPT     | predicted |
| CID441562  | LMNA     | predicted |
| CID441562  | ABCG2    | predicted |
| CID441562  | IDO1     | predicted |
| CID441562  | TDP1     | predicted |
| CID441562  | CYP3A4   | predicted |
| CID441562  | MCL1     | predicted |
| CID441562  | CA9      | predicted |
| CID441562  | CYP19A1  | predicted |
| CID441562  | ALDH1A1  | predicted |
| CID441562  | MAOA     | predicted |
| CID441562  | CA7      | predicted |

|           |         |           |
|-----------|---------|-----------|
| CID441562 | CA14    | predicted |
| CID441562 | KDM4E   | predicted |
| CID441562 | SMN1    | predicted |
| CID7794   | PTPN1   | predicted |
| CID7794   | TSHR    | predicted |
| CID7794   | LMNA    | predicted |
| CID7794   | ALDH1A1 | predicted |
| CID7794   | MAPT    | predicted |
| CID7794   | CYP3A4  | predicted |
| CID7794   | ALOX15  | predicted |
| CID7794   | TDP1    | predicted |
| CID7794   | KMT2A   | predicted |
| CID7794   | ACHE    | predicted |
| CID7794   | ALOX5   | predicted |
| CID7794   | CYP19A1 | predicted |
| CID7794   | PPARG   | predicted |
| CID7794   | RAB9A   | predicted |
| CID7794   | MAPK1   | predicted |
| CID7794   | NPC1    | predicted |
| CID7794   | CYP2A6  | predicted |
| CID7794   | SMN1    | predicted |
| CID7794   | BCHE    | predicted |
| CID7794   | TP53    | predicted |
| CID10817  | ACHE    | predicted |
| CID10817  | CYP2A6  | predicted |
| CID10817  | CYP19A1 | predicted |
| CID10817  | LMNA    | predicted |
| CID10817  | MAPT    | predicted |
| CID10817  | CYP3A4  | predicted |
| CID10817  | TSHR    | predicted |
| CID10817  | TDP1    | predicted |
| CID10817  | ALDH1A1 | predicted |
| CID10817  | PPARG   | predicted |
| CID10817  | SMN1    | predicted |
| CID10817  | KMT2A   | predicted |
| CID10817  | ABCG2   | predicted |
| CID10817  | PTGS1   | predicted |
| CID10817  | ESR1    | predicted |
| CID10817  | PTPN1   | predicted |
| CID10817  | ESR2    | predicted |
| CID10817  | TAAR1   | predicted |
| CID10817  | RAB9A   | predicted |
| CID10817  | TP53    | predicted |
| CID5408   | PTPN1   | predicted |
| CID5408   | LMNA    | predicted |
| CID5408   | GPBAR1  | predicted |
| CID5408   | MAPT    | predicted |
| CID5408   | TSHR    | predicted |
| CID5408   | CYP3A4  | predicted |
| CID5408   | CYP19A1 | predicted |
| CID5408   | RAB9A   | predicted |
| CID5408   | SHBG    | predicted |
| CID5408   | HSD11B1 | predicted |
| CID5408   | SMN1    | predicted |
| CID5408   | TNF     | predicted |
| CID5408   | ALOX5   | predicted |
| CID5408   | NPC1    | predicted |
| CID5408   | TDP1    | predicted |

|          |          |           |
|----------|----------|-----------|
| CID5408  | ALDH1A1  | predicted |
| CID5408  | MPEG1    | predicted |
| CID5408  | KMT2A    | predicted |
| CID5408  | SLCO1B3  | predicted |
| CID5408  | AKR1B10  | predicted |
| CID69505 | CYP3A4   | predicted |
| CID69505 | ABCB1    | predicted |
| CID69505 | ABCG2    | predicted |
| CID69505 | MAPT     | predicted |
| CID69505 | BACE1    | predicted |
| CID69505 | MAOA     | predicted |
| CID69505 | ACHE     | predicted |
| CID69505 | ODC1     | predicted |
| CID69505 | ALDH1A1  | predicted |
| CID69505 | ADORA3   | predicted |
| CID69505 | CA13     | predicted |
| CID69505 | LMNA     | predicted |
| CID69505 | CA9      | predicted |
| CID69505 | NPC1     | predicted |
| CID69505 | CTSV     | predicted |
| CID69505 | KMT2A    | predicted |
| CID69505 | CA12     | predicted |
| CID69505 | TDP1     | predicted |
| CID69505 | CYP19A1  | predicted |
| CID69505 | RAB9A    | predicted |
| CID5154  | MAPT     | predicted |
| CID5154  | CYP2C9   | predicted |
| CID5154  | TSHR     | predicted |
| CID5154  | ALDH1A1  | predicted |
| CID5154  | HPGD     | predicted |
| CID5154  | SMN1     | predicted |
| CID5154  | TDP1     | predicted |
| CID5154  | MAPK1    | predicted |
| CID5154  | BLM      | predicted |
| CID5154  | KMT2A    | predicted |
| CID5154  | NPC1     | predicted |
| CID5154  | RECQL    | predicted |
| CID5154  | RAB9A    | predicted |
| CID5154  | USP2     | predicted |
| CID5154  | APEX1    | predicted |
| CID5154  | NPSR1    | predicted |
| CID5154  | GMNN     | predicted |
| CID5154  | PMP22    | predicted |
| CID5154  | KCNN3    | predicted |
| CID5154  | THRB     | predicted |
| CID5154  | ALOX15   | Known     |
| CID5154  | TP53     | Known     |
| CID5154  | HSD17B10 | Known     |
| CID5154  | THPO     | Known     |
| CID5154  | CYP3A4   | Known     |
| CID5154  | LMNA     | Known     |
| CID5154  | PKM      | Known     |
| CID5154  | ALOX12   | Known     |
| CID5154  | HIF1A    | Known     |
| CID5154  | NFKB1    | Known     |
| CID5154  | CYP2C19  | Known     |
| CID5154  | HTT      | Known     |
| CID5154  | CYP2D6   | Known     |

|             |          |           |
|-------------|----------|-----------|
| CID5154     | KDM4E    | Known     |
| CID5154     | MTOR     | Known     |
| CID5154     | STAT6    | Known     |
| CID619166   | PTPN1    | predicted |
| CID619166   | LMNA     | predicted |
| CID619166   | GPBAR1   | predicted |
| CID619166   | TSHR     | predicted |
| CID619166   | HSD11B1  | predicted |
| CID619166   | MAPT     | predicted |
| CID619166   | CYP3A4   | predicted |
| CID619166   | AKR1B10  | predicted |
| CID619166   | SMN1     | predicted |
| CID619166   | RAB9A    | predicted |
| CID619166   | PTPN2    | predicted |
| CID619166   | TNF      | predicted |
| CID619166   | SHBG     | predicted |
| CID619166   | CYP19A1  | predicted |
| CID619166   | SLCO1B3  | predicted |
| CID619166   | SLCO1B1  | predicted |
| CID619166   | TDP1     | predicted |
| CID619166   | NPC1     | predicted |
| CID619166   | NPSR1    | predicted |
| CID619166   | ALDH1A1  | predicted |
| CID6986     | LMNA     | predicted |
| CID6986     | PTPN1    | predicted |
| CID6986     | TSHR     | predicted |
| CID6986     | MAPT     | predicted |
| CID6986     | CYP19A1  | predicted |
| CID6986     | GPBAR1   | predicted |
| CID6986     | TNF      | predicted |
| CID6986     | CYP3A4   | predicted |
| CID6986     | SMN1     | predicted |
| CID6986     | ALOX5    | predicted |
| CID6986     | CTSD     | predicted |
| CID6986     | ALDH1A1  | predicted |
| CID6986     | SHBG     | predicted |
| CID6986     | RAB9A    | predicted |
| CID6986     | TDP1     | predicted |
| CID6986     | MPEG1    | predicted |
| CID6986     | MAPK1    | predicted |
| CID6986     | KMT2A    | predicted |
| CID6986     | HSD11B1  | predicted |
| CID6986     | TRPV1    | predicted |
| CID14189383 | PTPN1    | predicted |
| CID14189383 | LMNA     | predicted |
| CID14189383 | MAPT     | predicted |
| CID14189383 | CYP3A4   | predicted |
| CID14189383 | RAB9A    | predicted |
| CID14189383 | TSHR     | predicted |
| CID14189383 | SMN1     | predicted |
| CID14189383 | GPBAR1   | predicted |
| CID14189383 | HSD11B1  | predicted |
| CID14189383 | NPC1     | predicted |
| CID14189383 | TDP1     | predicted |
| CID14189383 | TNF      | predicted |
| CID14189383 | AKR1B10  | predicted |
| CID14189383 | HSP90AA1 | predicted |
| CID14189383 | AKR1B1   | predicted |

|             |          |           |
|-------------|----------|-----------|
| CID14189383 | IL2      | predicted |
| CID14189383 | CYP19A1  | predicted |
| CID14189383 | KMT2A    | predicted |
| CID14189383 | L3MBTL1  | predicted |
| CID14189383 | SLCO1B3  | predicted |
| CID258538   | PTPN1    | predicted |
| CID258538   | LMNA     | predicted |
| CID258538   | GPBAR1   | predicted |
| CID258538   | TSHR     | predicted |
| CID258538   | HSD11B1  | predicted |
| CID258538   | MAPT     | predicted |
| CID258538   | CYP3A4   | predicted |
| CID258538   | AKR1B10  | predicted |
| CID258538   | SMN1     | predicted |
| CID258538   | RAB9A    | predicted |
| CID258538   | SHBG     | predicted |
| CID258538   | PTPN2    | predicted |
| CID258538   | TNF      | predicted |
| CID258538   | CYP19A1  | predicted |
| CID258538   | TDP1     | predicted |
| CID258538   | SLCO1B3  | predicted |
| CID258538   | SLCO1B1  | predicted |
| CID258538   | NPC1     | predicted |
| CID258538   | ALDH1A1  | predicted |
| CID258538   | KMT2A    | predicted |
| CID305      | BBOX1    | predicted |
| CID305      | CHRFAM7A | predicted |
| CID305      | CHRN2    | predicted |
| CID305      | TSHR     | predicted |
| CID305      | TAAR1    | predicted |
| CID305      | HTR2C    | predicted |
| CID305      | HTR2A    | predicted |
| CID305      | LMNA     | predicted |
| CID305      | CYP2D6   | predicted |
| CID305      | HTR2B    | predicted |
| CID305      | CYP3A4   | predicted |
| CID305      | CHRM2    | predicted |
| CID305      | CHRM4    | predicted |
| CID305      | ACHE     | predicted |
| CID305      | HRH3     | predicted |
| CID305      | ALDH1A1  | predicted |
| CID305      | CHRM5    | predicted |
| CID305      | SMN1     | predicted |
| CID305      | MAOA     | predicted |
| CID305      | DRD1     | predicted |
| CID53399197 | LMNA     | predicted |
| CID53399197 | PTPN1    | predicted |
| CID53399197 | TSHR     | predicted |
| CID53399197 | MAPT     | predicted |
| CID53399197 | SMN1     | predicted |
| CID53399197 | CYP3A4   | predicted |
| CID53399197 | AKR1B10  | predicted |
| CID53399197 | GPBAR1   | predicted |
| CID53399197 | HSD11B1  | predicted |
| CID53399197 | TDP1     | predicted |
| CID53399197 | RAB9A    | predicted |
| CID53399197 | NPC1     | predicted |
| CID53399197 | KMT2A    | predicted |



|             |          |           |
|-------------|----------|-----------|
| CID53399197 | MAPK1    | predicted |
| CID53399197 | TP53     | predicted |
| CID53399197 | CYP19A1  | predicted |
| CID53399197 | NPSR1    | predicted |
| CID53399197 | HTT      | predicted |
| CID53399197 | TOP1     | predicted |
| CID53399197 | ALDH1A1  | predicted |
| CID53399169 | CYP3A4   | predicted |
| CID53399169 | LMNA     | predicted |
| CID53399169 | MAPT     | predicted |
| CID53399169 | TDP1     | predicted |
| CID53399169 | AKR1B1   | predicted |
| CID53399169 | RAB9A    | predicted |
| CID53399169 | POLB     | predicted |
| CID53399169 | NPC1     | predicted |
| CID53399169 | IL2      | predicted |
| CID53399169 | SMN1     | predicted |
| CID53399169 | ABCG2    | predicted |
| CID53399169 | L3MBTL1  | predicted |
| CID53399169 | TSHR     | predicted |
| CID53399169 | APEX1    | predicted |
| CID53399169 | CYP19A1  | predicted |
| CID53399169 | PDE5A    | predicted |
| CID53399169 | GAA      | predicted |
| CID53399169 | KDM4E    | predicted |
| CID53399169 | PTPN1    | predicted |
| CID53399169 | BACE1    | predicted |
| CID892      | LMNA     | predicted |
| CID892      | MAPT     | predicted |
| CID892      | CYP3A4   | predicted |
| CID892      | PTPN1    | predicted |
| CID892      | TSHR     | predicted |
| CID892      | TDP1     | predicted |
| CID892      | SMN1     | predicted |
| CID892      | IL2      | predicted |
| CID892      | AKR1B1   | predicted |
| CID892      | RAB9A    | predicted |
| CID892      | NPC1     | predicted |
| CID892      | POLB     | predicted |
| CID892      | L3MBTL1  | predicted |
| CID892      | GAA      | predicted |
| CID892      | HSP90AA1 | predicted |
| CID892      | APEX1    | predicted |
| CID892      | MAPK1    | predicted |
| CID892      | TNF      | predicted |
| CID892      | BACE1    | predicted |
| CID892      | CYP19A1  | predicted |
| CID578237   | PTPN1    | predicted |
| CID578237   | LMNA     | predicted |
| CID578237   | TSHR     | predicted |
| CID578237   | MAPT     | predicted |
| CID578237   | GPBAR1   | predicted |
| CID578237   | CYP3A4   | predicted |
| CID578237   | SLCO1B3  | predicted |
| CID578237   | HSD11B1  | predicted |
| CID578237   | SLCO1B1  | predicted |
| CID578237   | TP53     | predicted |
| CID578237   | ACHE     | predicted |

|            |         |           |
|------------|---------|-----------|
| CID578237  | ALDH1A1 | predicted |
| CID578237  | RAB9A   | predicted |
| CID578237  | SMN1    | predicted |
| CID578237  | TDP1    | predicted |
| CID578237  | ALOX5   | predicted |
| CID578237  | KMT2A   | predicted |
| CID578237  | PTPN2   | predicted |
| CID578237  | TNF     | predicted |
| CID578237  | SHBG    | predicted |
| CID14260   | TSHR    | predicted |
| CID14260   | MPEG1   | predicted |
| CID14260   | ALOX5   | predicted |
| CID14260   | CNR2    | predicted |
| CID14260   | HMGCR   | predicted |
| CID14260   | FAAH    | predicted |
| CID14260   | CNR1    | predicted |
| CID14260   | LMNA    | predicted |
| CID14260   | TRPV1   | predicted |
| CID14260   | TRPA1   | predicted |
| CID14260   | ALDH1A1 | predicted |
| CID14260   | CYP3A4  | predicted |
| CID14260   | MAPT    | predicted |
| CID14260   | PPARG   | predicted |
| CID14260   | FABP3   | predicted |
| CID14260   | FNTA    | predicted |
| CID14260   | PPARA   | predicted |
| CID14260   | CCR5    | predicted |
| CID14260   | TP53    | predicted |
| CID14260   | PPARD   | predicted |
| CID9965876 | GPBAR1  | predicted |
| CID9965876 | PTPN1   | predicted |
| CID9965876 | LMNA    | predicted |
| CID9965876 | MAPT    | predicted |
| CID9965876 | SHBG    | predicted |
| CID9965876 | TSHR    | predicted |
| CID9965876 | RAB9A   | predicted |
| CID9965876 | CYP3A4  | predicted |
| CID9965876 | HSD11B1 | predicted |
| CID9965876 | NPC1    | predicted |
| CID9965876 | SMN1    | predicted |
| CID9965876 | CYP19A1 | predicted |
| CID9965876 | SLCO1B1 | predicted |
| CID9965876 | TDP1    | predicted |
| CID9965876 | SLCO1B3 | predicted |
| CID9965876 | ESR1    | predicted |
| CID9965876 | AKR1B10 | predicted |
| CID9965876 | TNF     | predicted |
| CID9965876 | TP53    | predicted |
| CID9965876 | MAPK1   | predicted |
| CID440114  | GPBAR1  | predicted |
| CID440114  | PTPN1   | predicted |
| CID440114  | LMNA    | predicted |
| CID440114  | CYP19A1 | predicted |
| CID440114  | SHBG    | predicted |
| CID440114  | TNF     | predicted |
| CID440114  | MAPT    | predicted |
| CID440114  | HSD11B1 | predicted |
| CID440114  | TSHR    | predicted |

|            |         |           |
|------------|---------|-----------|
| CID440114  | G6PD    | predicted |
| CID440114  | CYP3A4  | predicted |
| CID440114  | RAB9A   | predicted |
| CID440114  | SMN1    | predicted |
| CID440114  | CTSD    | predicted |
| CID440114  | AKR1B10 | predicted |
| CID440114  | ALOX5   | predicted |
| CID440114  | ALDH1A1 | predicted |
| CID440114  | NPSR1   | predicted |
| CID440114  | SLCO1B3 | predicted |
| CID440114  | NPC1    | predicted |
| CID9857253 | GPBAR1  | predicted |
| CID9857253 | PTPN1   | predicted |
| CID9857253 | LMNA    | predicted |
| CID9857253 | MAPT    | predicted |
| CID9857253 | SHBG    | predicted |
| CID9857253 | TSHR    | predicted |
| CID9857253 | RAB9A   | predicted |
| CID9857253 | CYP3A4  | predicted |
| CID9857253 | HSD11B1 | predicted |
| CID9857253 | NPC1    | predicted |
| CID9857253 | SMN1    | predicted |
| CID9857253 | CYP19A1 | predicted |
| CID9857253 | SLCO1B1 | predicted |
| CID9857253 | TDP1    | predicted |
| CID9857253 | SLCO1B3 | predicted |
| CID9857253 | ESR1    | predicted |
| CID9857253 | AKR1B10 | predicted |
| CID9857253 | TNF     | predicted |
| CID9857253 | TP53    | predicted |
| CID9857253 | MAPK1   | predicted |
| CID12452   | PTPN1   | predicted |
| CID12452   | GPBAR1  | predicted |
| CID12452   | LMNA    | predicted |
| CID12452   | TNF     | predicted |
| CID12452   | SHBG    | predicted |
| CID12452   | CYP19A1 | predicted |
| CID12452   | MAPT    | predicted |
| CID12452   | HSD11B1 | predicted |
| CID12452   | TSHR    | predicted |
| CID12452   | CYP3A4  | predicted |
| CID12452   | G6PD    | predicted |
| CID12452   | RAB9A   | predicted |
| CID12452   | SMN1    | predicted |
| CID12452   | ALOX5   | predicted |
| CID12452   | AKR1B10 | predicted |
| CID12452   | ALDH1A1 | predicted |
| CID12452   | SLCO1B3 | predicted |
| CID12452   | HSD11B2 | predicted |
| CID12452   | SLCO1B1 | predicted |
| CID12452   | NPC1    | predicted |
| CID6128    | PTPN1   | predicted |
| CID6128    | GPBAR1  | predicted |
| CID6128    | LMNA    | predicted |
| CID6128    | SHBG    | predicted |
| CID6128    | CYP19A1 | predicted |
| CID6128    | TNF     | predicted |
| CID6128    | MAPT    | predicted |

|             |         |           |
|-------------|---------|-----------|
| CID6128     | HSD11B1 | predicted |
| CID6128     | TSHR    | predicted |
| CID6128     | G6PD    | predicted |
| CID6128     | CYP3A4  | predicted |
| CID6128     | RAB9A   | predicted |
| CID6128     | ALOX5   | predicted |
| CID6128     | SMN1    | predicted |
| CID6128     | AKR1B10 | predicted |
| CID6128     | ALDH1A1 | predicted |
| CID6128     | HSD11B2 | predicted |
| CID6128     | NPC1    | predicted |
| CID6128     | SLCO1B3 | predicted |
| CID6128     | SLCO1B1 | predicted |
| CID5879     | GPBAR1  | predicted |
| CID5879     | PTPN1   | predicted |
| CID5879     | LMNA    | predicted |
| CID5879     | SHBG    | predicted |
| CID5879     | MAPT    | predicted |
| CID5879     | CYP19A1 | predicted |
| CID5879     | TSHR    | predicted |
| CID5879     | G6PD    | predicted |
| CID5879     | HSD11B1 | predicted |
| CID5879     | TNF     | predicted |
| CID5879     | CYP3A4  | predicted |
| CID5879     | RAB9A   | predicted |
| CID5879     | SMN1    | predicted |
| CID5879     | AKR1B10 | predicted |
| CID5879     | NPC1    | predicted |
| CID5879     | SLCO1B3 | predicted |
| CID5879     | ALOX5   | predicted |
| CID5879     | SLCO1B1 | predicted |
| CID5879     | TDP1    | predicted |
| CID5879     | NPSR1   | predicted |
| CID77514    | MAPT    | predicted |
| CID77514    | CYP3A4  | predicted |
| CID77514    | LMNA    | predicted |
| CID77514    | ABCG2   | predicted |
| CID77514    | ALDH1A1 | predicted |
| CID77514    | MAOA    | predicted |
| CID77514    | TDP1    | predicted |
| CID77514    | TSHR    | predicted |
| CID77514    | NPC1    | predicted |
| CID77514    | KMT2A   | predicted |
| CID77514    | KDM4E   | predicted |
| CID77514    | RAB9A   | predicted |
| CID77514    | ACHE    | predicted |
| CID77514    | CYP1A2  | predicted |
| CID77514    | MAPK1   | predicted |
| CID77514    | SMN1    | predicted |
| CID77514    | CYP19A1 | predicted |
| CID77514    | ALOX15  | predicted |
| CID77514    | BACE1   | predicted |
| CID77514    | TP53    | predicted |
| CID12284307 | PTPN1   | predicted |
| CID12284307 | LMNA    | predicted |
| CID12284307 | TSHR    | predicted |
| CID12284307 | GPBAR1  | predicted |
| CID12284307 | MAPT    | predicted |

|             |         |           |
|-------------|---------|-----------|
| CID12284307 | CYP3A4  | predicted |
| CID12284307 | CYP19A1 | predicted |
| CID12284307 | TNF     | predicted |
| CID12284307 | HSD11B1 | predicted |
| CID12284307 | ALOX5   | predicted |
| CID12284307 | SHBG    | predicted |
| CID12284307 | RAB9A   | predicted |
| CID12284307 | SMN1    | predicted |
| CID12284307 | ALDH1A1 | predicted |
| CID12284307 | ALOX15  | predicted |
| CID12284307 | MPEG1   | predicted |
| CID12284307 | NPC1    | predicted |
| CID12284307 | VDR     | predicted |
| CID12284307 | FABP1   | predicted |
| CID12284307 | TRPV1   | predicted |
| CID10243    | P2RX1   | predicted |
| CID10243    | CASP1   | predicted |
| CID10243    | PDXK    | predicted |
| CID10243    | CYP2D6  | predicted |
| CID10243    | CYP1A2  | predicted |
| CID10243    | TP53    | predicted |
| CID10243    | CYP3A4  | predicted |
| CID10243    | SMN1    | predicted |
| CID10243    | LMNA    | predicted |
| CID10243    | MAPT    | predicted |
| CID10243    | TSHR    | predicted |
| CID10243    | MAOA    | predicted |
| CID10243    | CASP7   | predicted |
| CID10243    | ALDH1A1 | predicted |
| CID10243    | TDP1    | predicted |
| CID10243    | CA2     | predicted |
| CID10243    | CYP2A6  | predicted |
| CID10243    | CA1     | predicted |
| CID10243    | CCR5    | predicted |
| CID10243    | RAB9A   | predicted |
| CID5316264  | TSHR    | predicted |
| CID5316264  | LMNA    | predicted |
| CID5316264  | HMGCR   | predicted |
| CID5316264  | MPEG1   | predicted |
| CID5316264  | FAAH    | predicted |
| CID5316264  | ALOX5   | predicted |
| CID5316264  | TRPV1   | predicted |
| CID5316264  | PPARG   | predicted |
| CID5316264  | MAPT    | predicted |
| CID5316264  | PTPN1   | predicted |
| CID5316264  | CYP3A4  | predicted |
| CID5316264  | FABP3   | predicted |
| CID5316264  | OXER1   | predicted |
| CID5316264  | PPARA   | predicted |
| CID5316264  | ALDH1A1 | predicted |
| CID5316264  | PPARD   | predicted |
| CID5316264  | CNR1    | predicted |
| CID5316264  | CYP19A1 | predicted |
| CID5316264  | NFKB1   | predicted |
| CID5316264  | CNR2    | predicted |
| CID77153    | TSHR    | predicted |
| CID77153    | LMNA    | predicted |
| CID77153    | MPEG1   | predicted |

|            |         |           |
|------------|---------|-----------|
| CID77153   | HMGCR   | predicted |
| CID77153   | ALOX5   | predicted |
| CID77153   | FAAH    | predicted |
| CID77153   | TRPV1   | predicted |
| CID77153   | PTPN1   | predicted |
| CID77153   | PPARG   | predicted |
| CID77153   | MAPT    | predicted |
| CID77153   | FABP3   | predicted |
| CID77153   | CYP3A4  | predicted |
| CID77153   | PPARA   | predicted |
| CID77153   | OXER1   | predicted |
| CID77153   | PPARD   | predicted |
| CID77153   | ALDH1A1 | predicted |
| CID77153   | CYP19A1 | predicted |
| CID77153   | NFKB1   | predicted |
| CID77153   | GPBAR1  | predicted |
| CID77153   | ACHE    | predicted |
| CID5316269 | TSHR    | predicted |
| CID5316269 | LMNA    | predicted |
| CID5316269 | HMGCR   | predicted |
| CID5316269 | MPEG1   | predicted |
| CID5316269 | FAAH    | predicted |
| CID5316269 | ALOX5   | predicted |
| CID5316269 | TRPV1   | predicted |
| CID5316269 | PPARG   | predicted |
| CID5316269 | MAPT    | predicted |
| CID5316269 | PTPN1   | predicted |
| CID5316269 | CYP3A4  | predicted |
| CID5316269 | FABP3   | predicted |
| CID5316269 | OXER1   | predicted |
| CID5316269 | PPARA   | predicted |
| CID5316269 | ALDH1A1 | predicted |
| CID5316269 | PPARD   | predicted |
| CID5316269 | CNR1    | predicted |
| CID5316269 | CYP19A1 | predicted |
| CID5316269 | NFKB1   | predicted |
| CID5316269 | CNR2    | predicted |
| CID5316410 | TSHR    | predicted |
| CID5316410 | CCR5    | predicted |
| CID5316410 | ALOX15  | predicted |
| CID5316410 | KDM4E   | predicted |
| CID5316410 | TDP1    | predicted |
| CID5316410 | LMNA    | predicted |
| CID5316410 | MAPT    | predicted |
| CID5316410 | MPEG1   | predicted |
| CID5316410 | HMGCR   | predicted |
| CID5316410 | ALOX5   | predicted |
| CID5316410 | FAAH    | predicted |
| CID5316410 | TRPV1   | predicted |
| CID5316410 | PPARG   | predicted |
| CID5316410 | RAB9A   | predicted |
| CID5316410 | ACHE    | predicted |
| CID5316410 | NPC1    | predicted |
| CID5316410 | CYP3A4  | predicted |
| CID5316410 | FABP3   | predicted |
| CID5316410 | CNR1    | predicted |
| CID5316410 | PTPN1   | predicted |
| CID5281158 | CTSV    | predicted |

|            |         |           |
|------------|---------|-----------|
| CID5281158 | PARP1   | predicted |
| CID5281158 | ABCG2   | predicted |
| CID5281158 | MAPT    | predicted |
| CID5281158 | MAOA    | predicted |
| CID5281158 | TSHR    | predicted |
| CID5281158 | KMT2A   | predicted |
| CID5281158 | LMNA    | predicted |
| CID5281158 | CYP19A1 | predicted |
| CID5281158 | CYP3A4  | predicted |
| CID5281158 | NPSR1   | predicted |
| CID5281158 | ALDH1A1 | predicted |
| CID5281158 | SMN1    | predicted |
| CID5281158 | ACHE    | predicted |
| CID5281158 | RAB9A   | predicted |
| CID5281158 | MCL1    | predicted |
| CID5281158 | KDM4E   | predicted |
| CID5281158 | NPC1    | predicted |
| CID5281158 | TDP1    | predicted |
| CID5281158 | TP53    | predicted |
| CID68570   | PTPN1   | predicted |
| CID68570   | LMNA    | predicted |
| CID68570   | MAPT    | predicted |
| CID68570   | CYP3A4  | predicted |
| CID68570   | GPBAR1  | predicted |
| CID68570   | SHBG    | predicted |
| CID68570   | ESR1    | predicted |
| CID68570   | CYP19A1 | predicted |
| CID68570   | RAB9A   | predicted |
| CID68570   | SMN1    | predicted |
| CID68570   | TSHR    | predicted |
| CID68570   | ESR2    | predicted |
| CID68570   | TDP1    | predicted |
| CID68570   | NPC1    | predicted |
| CID68570   | MAPK1   | predicted |
| CID68570   | ACHE    | predicted |
| CID68570   | HSD11B1 | predicted |
| CID68570   | KMT2A   | predicted |
| CID68570   | OPRM1   | predicted |
| CID68570   | BACE1   | predicted |
| CID5757    | PTPN1   | predicted |
| CID5757    | LMNA    | predicted |
| CID5757    | MAPT    | predicted |
| CID5757    | CYP3A4  | predicted |
| CID5757    | GPBAR1  | predicted |
| CID5757    | SHBG    | predicted |
| CID5757    | ESR1    | predicted |
| CID5757    | CYP19A1 | predicted |
| CID5757    | RAB9A   | predicted |
| CID5757    | SMN1    | predicted |
| CID5757    | TSHR    | predicted |
| CID5757    | ESR2    | predicted |
| CID5757    | TDP1    | predicted |
| CID5757    | NPC1    | predicted |
| CID5757    | MAPK1   | predicted |
| CID5757    | ACHE    | predicted |
| CID5757    | HSD11B1 | predicted |
| CID5757    | KMT2A   | predicted |
| CID5757    | OPRM1   | predicted |

|            |          |           |
|------------|----------|-----------|
| CID5757    | BACE1    | predicted |
| CID5318045 | LMNA     | predicted |
| CID5318045 | IL2      | predicted |
| CID5318045 | CYP3A4   | predicted |
| CID5318045 | TSHR     | predicted |
| CID5318045 | MAPT     | predicted |
| CID5318045 | AKR1B1   | predicted |
| CID5318045 | TDP1     | predicted |
| CID5318045 | RAB9A    | predicted |
| CID5318045 | SMN1     | predicted |
| CID5318045 | HSP90AA1 | predicted |
| CID5318045 | NPC1     | predicted |
| CID5318045 | L3MBTL1  | predicted |
| CID5318045 | POLB     | predicted |
| CID5318045 | APEX1    | predicted |
| CID5318045 | PSIP1    | predicted |
| CID5318045 | ALDH1A1  | predicted |
| CID5318045 | PTPN1    | predicted |
| CID5318045 | TNF      | predicted |
| CID5318045 | GAA      | predicted |
| CID5318045 | ACHE     | predicted |
| CID5880    | GPBAR1   | predicted |
| CID5880    | PTPN1    | predicted |
| CID5880    | LMNA     | predicted |
| CID5880    | SHBG     | predicted |
| CID5880    | MAPT     | predicted |
| CID5880    | CYP19A1  | predicted |
| CID5880    | TSHR     | predicted |
| CID5880    | G6PD     | predicted |
| CID5880    | HSD11B1  | predicted |
| CID5880    | TNF      | predicted |
| CID5880    | CYP3A4   | predicted |
| CID5880    | RAB9A    | predicted |
| CID5880    | SMN1     | predicted |
| CID5880    | AKR1B10  | predicted |
| CID5880    | NPC1     | predicted |
| CID5880    | SLCO1B3  | predicted |
| CID5880    | ALOX5    | predicted |
| CID5880    | SLCO1B1  | predicted |
| CID5880    | TDP1     | predicted |
| CID5880    | NPSR1    | predicted |
| CID441302  | GPBAR1   | predicted |
| CID441302  | PTPN1    | predicted |
| CID441302  | LMNA     | predicted |
| CID441302  | SHBG     | predicted |
| CID441302  | MAPT     | predicted |
| CID441302  | CYP19A1  | predicted |
| CID441302  | TSHR     | predicted |
| CID441302  | G6PD     | predicted |
| CID441302  | HSD11B1  | predicted |
| CID441302  | TNF      | predicted |
| CID441302  | CYP3A4   | predicted |
| CID441302  | RAB9A    | predicted |
| CID441302  | SMN1     | predicted |
| CID441302  | AKR1B10  | predicted |
| CID441302  | NPC1     | predicted |
| CID441302  | SLCO1B3  | predicted |
| CID441302  | ALOX5    | predicted |



|             |          |           |
|-------------|----------|-----------|
| CID441302   | SLCO1B1  | predicted |
| CID441302   | TDP1     | predicted |
| CID441302   | NPSR1    | predicted |
| CID6914763  | PTPN1    | predicted |
| CID6914763  | GPBAR1   | predicted |
| CID6914763  | LMNA     | predicted |
| CID6914763  | MAPT     | predicted |
| CID6914763  | CYP19A1  | predicted |
| CID6914763  | SHBG     | predicted |
| CID6914763  | TSHR     | predicted |
| CID6914763  | CYP3A4   | predicted |
| CID6914763  | TNF      | predicted |
| CID6914763  | HSD11B1  | predicted |
| CID6914763  | SMN1     | predicted |
| CID6914763  | G6PD     | predicted |
| CID6914763  | RAB9A    | predicted |
| CID6914763  | ALOX5    | predicted |
| CID6914763  | AKR1B10  | predicted |
| CID6914763  | ALDH1A1  | predicted |
| CID6914763  | NPC1     | predicted |
| CID6914763  | TDP1     | predicted |
| CID6914763  | KMT2A    | predicted |
| CID6914763  | SLCO1B3  | predicted |
| CID5881     | PTPN1    | predicted |
| CID5881     | GPBAR1   | predicted |
| CID5881     | LMNA     | predicted |
| CID5881     | SHBG     | predicted |
| CID5881     | MAPT     | predicted |
| CID5881     | CYP19A1  | predicted |
| CID5881     | TSHR     | predicted |
| CID5881     | G6PD     | predicted |
| CID5881     | TNF      | predicted |
| CID5881     | HSD11B1  | predicted |
| CID5881     | CYP3A4   | predicted |
| CID5881     | RAB9A    | predicted |
| CID5881     | SMN1     | predicted |
| CID5881     | AKR1B10  | predicted |
| CID5881     | ALOX5    | predicted |
| CID5881     | NPC1     | predicted |
| CID5881     | ALDH1A1  | predicted |
| CID5881     | TDP1     | predicted |
| CID5881     | SLCO1B3  | predicted |
| CID5881     | SLCO1B1  | predicted |
| CID11359817 | LMNA     | predicted |
| CID11359817 | MAPT     | predicted |
| CID11359817 | CYP3A4   | predicted |
| CID11359817 | TSHR     | predicted |
| CID11359817 | RAB9A    | predicted |
| CID11359817 | SMN1     | predicted |
| CID11359817 | IL2      | predicted |
| CID11359817 | TDP1     | predicted |
| CID11359817 | PTPN1    | predicted |
| CID11359817 | NPC1     | predicted |
| CID11359817 | AKR1B1   | predicted |
| CID11359817 | HSP90AA1 | predicted |
| CID11359817 | CYP19A1  | predicted |
| CID11359817 | TNF      | predicted |
| CID11359817 | ALDH1A1  | predicted |

|             |          |           |
|-------------|----------|-----------|
| CID11359817 | L3MBTL1  | predicted |
| CID11359817 | POLB     | predicted |
| CID11359817 | ALOX5    | predicted |
| CID11359817 | ABCG2    | predicted |
| CID11359817 | KDM4E    | predicted |
| CID5497122  | LMNA     | predicted |
| CID5497122  | TSHR     | predicted |
| CID5497122  | PTPN1    | predicted |
| CID5497122  | GPBAR1   | predicted |
| CID5497122  | MAPT     | predicted |
| CID5497122  | CYP3A4   | predicted |
| CID5497122  | HMGCR    | predicted |
| CID5497122  | CYP19A1  | predicted |
| CID5497122  | SMN1     | predicted |
| CID5497122  | TNF      | predicted |
| CID5497122  | PPARG    | predicted |
| CID5497122  | ALDH1A1  | predicted |
| CID5497122  | RAB9A    | predicted |
| CID5497122  | TDP1     | predicted |
| CID5497122  | SHBG     | predicted |
| CID5497122  | PTGIR    | predicted |
| CID5497122  | NFKB1    | predicted |
| CID5497122  | ALOX5    | predicted |
| CID5497122  | HSD11B1  | predicted |
| CID5497122  | MAPK1    | predicted |
| CID5281204  | LMNA     | predicted |
| CID5281204  | PTPN1    | predicted |
| CID5281204  | TSHR     | predicted |
| CID5281204  | CYP3A4   | predicted |
| CID5281204  | MAPT     | predicted |
| CID5281204  | TNF      | predicted |
| CID5281204  | SMN1     | predicted |
| CID5281204  | RAB9A    | predicted |
| CID5281204  | TDP1     | predicted |
| CID5281204  | CYP19A1  | predicted |
| CID5281204  | GPBAR1   | predicted |
| CID5281204  | IL2      | predicted |
| CID5281204  | HMGCR    | predicted |
| CID5281204  | NPC1     | predicted |
| CID5281204  | AKR1B1   | predicted |
| CID5281204  | HSP90AA1 | predicted |
| CID5281204  | POLB     | predicted |
| CID5281204  | ALDH1A1  | predicted |
| CID5281204  | L3MBTL1  | predicted |
| CID5281204  | PPARG    | predicted |
| CID184938   | TSHR     | predicted |
| CID184938   | LMNA     | predicted |
| CID184938   | ALOX15   | predicted |
| CID184938   | TDP1     | predicted |
| CID184938   | CCR5     | predicted |
| CID184938   | KDM4E    | predicted |
| CID184938   | MAPT     | predicted |
| CID184938   | CYP3A4   | predicted |
| CID184938   | PTPN1    | predicted |
| CID184938   | MPEG1    | predicted |
| CID184938   | ALOX5    | predicted |
| CID184938   | RAB9A    | predicted |
| CID184938   | HMGCR    | predicted |

|              |          |           |
|--------------|----------|-----------|
| CID184938    | NPC1     | predicted |
| CID184938    | ACHE     | predicted |
| CID184938    | PPARG    | predicted |
| CID184938    | SMN1     | predicted |
| CID184938    | ALDH1A1  | predicted |
| CID184938    | TRPV1    | predicted |
| CID184938    | KMT2A    | predicted |
| CID184939    | TSHR     | predicted |
| CID184939    | LMNA     | predicted |
| CID184939    | ALOX15   | predicted |
| CID184939    | TDP1     | predicted |
| CID184939    | CCR5     | predicted |
| CID184939    | KDM4E    | predicted |
| CID184939    | MAPT     | predicted |
| CID184939    | CYP3A4   | predicted |
| CID184939    | PTPN1    | predicted |
| CID184939    | MPEG1    | predicted |
| CID184939    | RAB9A    | predicted |
| CID184939    | ALOX5    | predicted |
| CID184939    | NPC1     | predicted |
| CID184939    | HMGCR    | predicted |
| CID184939    | ACHE     | predicted |
| CID184939    | SMN1     | predicted |
| CID184939    | PPARG    | predicted |
| CID184939    | ALDH1A1  | predicted |
| CID184939    | KMT2A    | predicted |
| CID184939    | MAPK1    | predicted |
| CID101371575 | LMNA     | predicted |
| CID101371575 | CYP3A4   | predicted |
| CID101371575 | MAPT     | predicted |
| CID101371575 | TSHR     | predicted |
| CID101371575 | PTPN1    | predicted |
| CID101371575 | SMN1     | predicted |
| CID101371575 | RAB9A    | predicted |
| CID101371575 | TDP1     | predicted |
| CID101371575 | NPC1     | predicted |
| CID101371575 | HSP90AA1 | predicted |
| CID101371575 | AKR1B1   | predicted |
| CID101371575 | ALDH1A1  | predicted |
| CID101371575 | IL2      | predicted |
| CID101371575 | L3MBTL1  | predicted |
| CID101371575 | KMT2A    | predicted |
| CID101371575 | POLB     | predicted |
| CID101371575 | TP53     | predicted |
| CID101371575 | CYP19A1  | predicted |
| CID101371575 | MAPK1    | predicted |
| CID101371575 | BACE1    | predicted |
| CID101371574 | LMNA     | predicted |
| CID101371574 | CYP3A4   | predicted |
| CID101371574 | MAPT     | predicted |
| CID101371574 | TSHR     | predicted |
| CID101371574 | PTPN1    | predicted |
| CID101371574 | SMN1     | predicted |
| CID101371574 | RAB9A    | predicted |
| CID101371574 | TDP1     | predicted |
| CID101371574 | NPC1     | predicted |
| CID101371574 | AKR1B1   | predicted |
| CID101371574 | HSP90AA1 | predicted |

|              |          |           |
|--------------|----------|-----------|
| CID101371574 | TP53     | predicted |
| CID101371574 | ALDH1A1  | predicted |
| CID101371574 | IL2      | predicted |
| CID101371574 | POLB     | predicted |
| CID101371574 | MAPK1    | predicted |
| CID101371574 | KMT2A    | predicted |
| CID101371574 | L3MBTL1  | predicted |
| CID101371574 | CYP19A1  | predicted |
| CID101371574 | ACHE     | predicted |
| CID101371573 | LMNA     | predicted |
| CID101371573 | PTPN1    | predicted |
| CID101371573 | MAPT     | predicted |
| CID101371573 | TSHR     | predicted |
| CID101371573 | CYP3A4   | predicted |
| CID101371573 | IL2      | predicted |
| CID101371573 | RAB9A    | predicted |
| CID101371573 | TDP1     | predicted |
| CID101371573 | NPC1     | predicted |
| CID101371573 | SMN1     | predicted |
| CID101371573 | AKR1B1   | predicted |
| CID101371573 | HSP90AA1 | predicted |
| CID101371573 | L3MBTL1  | predicted |
| CID101371573 | TNF      | predicted |
| CID101371573 | POLB     | predicted |
| CID101371573 | CYP19A1  | predicted |
| CID101371573 | ACHE     | predicted |
| CID101371573 | APEX1    | predicted |
| CID101371573 | ALDH1A1  | predicted |
| CID101371573 | KMT2A    | predicted |
| CID101006119 | LMNA     | predicted |
| CID101006119 | TSHR     | predicted |
| CID101006119 | PTPN1    | predicted |
| CID101006119 | MAPT     | predicted |
| CID101006119 | CYP3A4   | predicted |
| CID101006119 | CYP19A1  | predicted |
| CID101006119 | SMN1     | predicted |
| CID101006119 | GPBAR1   | predicted |
| CID101006119 | ALDH1A1  | predicted |
| CID101006119 | TNF      | predicted |
| CID101006119 | RAB9A    | predicted |
| CID101006119 | HMGCR    | predicted |
| CID101006119 | TDP1     | predicted |
| CID101006119 | PPARG    | predicted |
| CID101006119 | KMT2A    | predicted |
| CID101006119 | SHBG     | predicted |
| CID101006119 | NPC1     | predicted |
| CID101006119 | ALOX5    | predicted |
| CID101006119 | MAPK1    | predicted |
| CID101006119 | HSD11B1  | predicted |
| CID11784401  | LMNA     | predicted |
| CID11784401  | TSHR     | predicted |
| CID11784401  | PTPN1    | predicted |
| CID11784401  | CYP3A4   | predicted |
| CID11784401  | MAPT     | predicted |
| CID11784401  | SMN1     | predicted |
| CID11784401  | TNF      | predicted |
| CID11784401  | RAB9A    | predicted |
| CID11784401  | TDP1     | predicted |

|              |          |           |
|--------------|----------|-----------|
| CID11784401  | CYP19A1  | predicted |
| CID11784401  | IL2      | predicted |
| CID11784401  | NPC1     | predicted |
| CID11784401  | GPBAR1   | predicted |
| CID11784401  | ALDH1A1  | predicted |
| CID11784401  | AKR1B1   | predicted |
| CID11784401  | HSP90AA1 | predicted |
| CID11784401  | HMGCR    | predicted |
| CID11784401  | PPARG    | predicted |
| CID11784401  | POLB     | predicted |
| CID11784401  | KMT2A    | predicted |
| CID5319723   | TSHR     | predicted |
| CID5319723   | LMNA     | predicted |
| CID5319723   | ALDH1A1  | predicted |
| CID5319723   | CYP3A4   | predicted |
| CID5319723   | MAPT     | predicted |
| CID5319723   | PTPN1    | predicted |
| CID5319723   | TP53     | predicted |
| CID5319723   | ALOX15   | predicted |
| CID5319723   | KMT2A    | predicted |
| CID5319723   | TDP1     | predicted |
| CID5319723   | TRPA1    | predicted |
| CID5319723   | SMN1     | predicted |
| CID5319723   | ALOX5    | predicted |
| CID5319723   | CNR2     | predicted |
| CID5319723   | ACHE     | predicted |
| CID5319723   | CYP19A1  | predicted |
| CID5319723   | RAB9A    | predicted |
| CID5319723   | ABCG2    | predicted |
| CID5319723   | MAPK1    | predicted |
| CID5319723   | CNR1     | predicted |
| CID5319724   | LMNA     | predicted |
| CID5319724   | TSHR     | predicted |
| CID5319724   | CYP3A4   | predicted |
| CID5319724   | ALDH1A1  | predicted |
| CID5319724   | MAPT     | predicted |
| CID5319724   | TP53     | predicted |
| CID5319724   | SMN1     | predicted |
| CID5319724   | TDP1     | predicted |
| CID5319724   | KMT2A    | predicted |
| CID5319724   | CA9      | predicted |
| CID5319724   | PTPN1    | predicted |
| CID5319724   | ALOX15   | predicted |
| CID5319724   | RAB9A    | predicted |
| CID5319724   | MAPK1    | predicted |
| CID5319724   | NPC1     | predicted |
| CID5319724   | CA1      | predicted |
| CID5319724   | CYP19A1  | predicted |
| CID5319724   | ALOX5    | predicted |
| CID5319724   | ACHE     | predicted |
| CID5319724   | CA12     | predicted |
| CID100913978 | FNTB     | predicted |
| CID100913978 | FNTA     | predicted |
| CID100913978 | NT5E     | predicted |
| CID100913978 | TSHR     | predicted |
| CID100913978 | LMNA     | predicted |
| CID100913978 | PTPN1    | predicted |
| CID100913978 | TDP1     | predicted |

|              |         |           |
|--------------|---------|-----------|
| CID100913978 | ECE1    | predicted |
| CID100913978 | CYP3A4  | predicted |
| CID100913978 | MAPT    | predicted |
| CID100913978 | ALDH1A1 | predicted |
| CID100913978 | SMN1    | predicted |
| CID100913978 | CA1     | predicted |
| CID100913978 | CYP19A1 | predicted |
| CID100913978 | CA9     | predicted |
| CID100913978 | ALOX15  | predicted |
| CID100913978 | RAB9A   | predicted |
| CID100913978 | TRPA1   | predicted |
| CID100913978 | NPC1    | predicted |
| CID100913978 | CA12    | predicted |
| CID3017316   | LMNA    | predicted |
| CID3017316   | TSHR    | predicted |
| CID3017316   | PTPN1   | predicted |
| CID3017316   | MAPT    | predicted |
| CID3017316   | CYP3A4  | predicted |
| CID3017316   | GPBAR1  | predicted |
| CID3017316   | TDP1    | predicted |
| CID3017316   | MPEG1   | predicted |
| CID3017316   | ALOX5   | predicted |
| CID3017316   | HMGCR   | predicted |
| CID3017316   | PPARG   | predicted |
| CID3017316   | SMN1    | predicted |
| CID3017316   | TRPV1   | predicted |
| CID3017316   | RAB9A   | predicted |
| CID3017316   | ALOX15  | predicted |
| CID3017316   | SHBG    | predicted |
| CID3017316   | ACHE    | predicted |
| CID3017316   | MAPK1   | predicted |
| CID3017316   | ALDH1A1 | predicted |
| CID3017316   | NPC1    | predicted |
| CID10947     | TSHR    | predicted |
| CID10947     | LMNA    | predicted |
| CID10947     | PTPN1   | predicted |
| CID10947     | MPEG1   | predicted |
| CID10947     | HMGCR   | predicted |
| CID10947     | ALOX5   | predicted |
| CID10947     | MAPT    | predicted |
| CID10947     | CYP19A1 | predicted |
| CID10947     | CYP3A4  | predicted |
| CID10947     | TRPV1   | predicted |
| CID10947     | PPARG   | predicted |
| CID10947     | FAAH    | predicted |
| CID10947     | GPBAR1  | predicted |
| CID10947     | ALDH1A1 | predicted |
| CID10947     | ACHE    | predicted |
| CID10947     | SMN1    | predicted |
| CID10947     | SHBG    | predicted |
| CID10947     | TDP1    | predicted |
| CID10947     | FABP3   | predicted |
| CID10947     | ALOX15  | predicted |
| CID5319970   | TSHR    | predicted |
| CID5319970   | CCR5    | predicted |
| CID5319970   | ALOX15  | predicted |
| CID5319970   | TDP1    | predicted |
| CID5319970   | KDM4E   | predicted |

|              |         |           |
|--------------|---------|-----------|
| CID5319970   | LMNA    | predicted |
| CID5319970   | MAPT    | predicted |
| CID5319970   | MPEG1   | predicted |
| CID5319970   | PTPN1   | predicted |
| CID5319970   | ALOX5   | predicted |
| CID5319970   | CYP3A4  | predicted |
| CID5319970   | HMGCR   | predicted |
| CID5319970   | ACHE    | predicted |
| CID5319970   | RAB9A   | predicted |
| CID5319970   | NPC1    | predicted |
| CID5319970   | TRPV1   | predicted |
| CID5319970   | PPARG   | predicted |
| CID5319970   | FAAH    | predicted |
| CID5319970   | ALDH1A1 | predicted |
| CID5319970   | CNR1    | predicted |
| CID149056507 | PTPN1   | predicted |
| CID149056507 | LMNA    | predicted |
| CID149056507 | GPBAR1  | predicted |
| CID149056507 | MAPT    | predicted |
| CID149056507 | TSHR    | predicted |
| CID149056507 | CYP3A4  | predicted |
| CID149056507 | CYP19A1 | predicted |
| CID149056507 | RAB9A   | predicted |
| CID149056507 | HSD11B1 | predicted |
| CID149056507 | SHBG    | predicted |
| CID149056507 | SMN1    | predicted |
| CID149056507 | TNF     | predicted |
| CID149056507 | ALOX5   | predicted |
| CID149056507 | NPC1    | predicted |
| CID149056507 | TDP1    | predicted |
| CID149056507 | ALDH1A1 | predicted |
| CID149056507 | MPEG1   | predicted |
| CID149056507 | KMT2A   | predicted |
| CID149056507 | SLCO1B3 | predicted |
| CID149056507 | TP53    | predicted |
| CID6326181   | PTPN1   | predicted |
| CID6326181   | LMNA    | predicted |
| CID6326181   | GPBAR1  | predicted |
| CID6326181   | NR1H3   | predicted |
| CID6326181   | TSHR    | predicted |
| CID6326181   | PRKCD   | predicted |
| CID6326181   | MAPT    | predicted |
| CID6326181   | RAB9A   | predicted |
| CID6326181   | NPC1    | predicted |
| CID6326181   | CYP3A4  | predicted |
| CID6326181   | HSD11B1 | predicted |
| CID6326181   | SHBG    | predicted |
| CID6326181   | ESR1    | predicted |
| CID6326181   | SMN1    | predicted |
| CID6326181   | XBP1    | predicted |
| CID6326181   | PRKCA   | predicted |
| CID6326181   | CYP19A1 | predicted |
| CID6326181   | AKR1B10 | predicted |
| CID6326181   | NPSR1   | predicted |
| CID6326181   | SLCO1B1 | predicted |
| CID101371577 | LMNA    | predicted |
| CID101371577 | PTPN1   | predicted |
| CID101371577 | TSHR    | predicted |

|              |          |           |
|--------------|----------|-----------|
| CID101371577 | MAPT     | predicted |
| CID101371577 | CYP3A4   | predicted |
| CID101371577 | RAB9A    | predicted |
| CID101371577 | SMN1     | predicted |
| CID101371577 | NPC1     | predicted |
| CID101371577 | TDP1     | predicted |
| CID101371577 | IL2      | predicted |
| CID101371577 | AKR1B1   | predicted |
| CID101371577 | L3MBTL1  | predicted |
| CID101371577 | HSP90AA1 | predicted |
| CID101371577 | TNF      | predicted |
| CID101371577 | CYP19A1  | predicted |
| CID101371577 | ACHE     | predicted |
| CID101371577 | POLB     | predicted |
| CID101371577 | KMT2A    | predicted |
| CID101371577 | ALDH1A1  | predicted |
| CID101371577 | TP53     | predicted |
| CID54706645  | CA13     | predicted |
| CID54706645  | CA6      | predicted |
| CID54706645  | CA4      | predicted |
| CID54706645  | CA5A     | predicted |
| CID54706645  | CA5B     | predicted |
| CID54706645  | CA3      | predicted |
| CID54706645  | HSD17B10 | predicted |
| CID54706645  | HSD17B3  | predicted |
| CID54706645  | MB       | predicted |
| CID54706645  | GLA      | predicted |
| CID54706645  | ESR2     | predicted |
| CID54706645  | LMNA     | predicted |
| CID54706645  | HPGD     | predicted |
| CID54706645  | GAA      | predicted |
| CID54706645  | TDP1     | predicted |
| CID54706645  | MAPT     | predicted |
| CID54706645  | SERPINE1 | predicted |
| CID54706645  | KDM4E    | predicted |
| CID54706645  | CYP3A4   | predicted |
| CID54706645  | KMT2A    | predicted |
| CID54706645  | CA9      | Known     |
| CID54706645  | CA12     | Known     |
| CID54706645  | CA1      | Known     |
| CID54706645  | CA7      | Known     |
| CID54706645  | CA2      | Known     |
| CID54706645  | CA14     | Known     |
| CID4437077   | LMNA     | predicted |
| CID4437077   | NR1H3    | predicted |
| CID4437077   | PTPN1    | predicted |
| CID4437077   | PRKCD    | predicted |
| CID4437077   | TSHR     | predicted |
| CID4437077   | MAPT     | predicted |
| CID4437077   | GPBAR1   | predicted |
| CID4437077   | CYP3A4   | predicted |
| CID4437077   | SMN1     | predicted |
| CID4437077   | RAB9A    | predicted |
| CID4437077   | ACHE     | predicted |
| CID4437077   | PRKCA    | predicted |
| CID4437077   | BCHE     | predicted |
| CID4437077   | HSD11B1  | predicted |
| CID4437077   | ESR1     | predicted |



|            |         |           |
|------------|---------|-----------|
| CID4437077 | TDP1    | predicted |
| CID4437077 | ALDH1A1 | predicted |
| CID4437077 | NPC1    | predicted |
| CID4437077 | CYP2D6  | predicted |
| CID4437077 | SHBG    | predicted |
| CID267361  | PTPN1   | predicted |
| CID267361  | LMNA    | predicted |
| CID267361  | MAPT    | predicted |
| CID267361  | GPBAR1  | predicted |
| CID267361  | CYP3A4  | predicted |
| CID267361  | TSHR    | predicted |
| CID267361  | SMN1    | predicted |
| CID267361  | RAB9A   | predicted |
| CID267361  | HSD11B1 | predicted |
| CID267361  | TNF     | predicted |
| CID267361  | TDP1    | predicted |
| CID267361  | NPC1    | predicted |
| CID267361  | AKR1B10 | predicted |
| CID267361  | IL2     | predicted |
| CID267361  | CYP19A1 | predicted |
| CID267361  | AKR1B1  | predicted |
| CID267361  | SHBG    | predicted |
| CID267361  | PTPN2   | predicted |
| CID267361  | POLB    | predicted |
| CID267361  | SLCO1B3 | predicted |
| CID2993    | CYP1A2  | predicted |
| CID2993    | GAA     | predicted |
| CID2993    | KCNN3   | predicted |
| CID2993    | TSHR    | predicted |
| CID2993    | LMNA    | predicted |
| CID2993    | CTSL    | predicted |
| CID2993    | MAPT    | predicted |
| CID2993    | TOP1    | predicted |
| CID2993    | AHR     | predicted |
| CID2993    | CTSV    | predicted |
| CID2993    | GLA     | predicted |
| CID2993    | MPEG1   | predicted |
| CID2993    | ECE1    | predicted |
| CID2993    | ACHE    | predicted |
| CID2993    | CYP3A4  | predicted |
| CID2993    | HMGCR   | predicted |
| CID2993    | CHRNA7  | predicted |
| CID2993    | ALOX5   | predicted |
| CID2993    | CYP2D6  | predicted |
| CID2993    | KMT2A   | predicted |
| CID443     | GPBAR1  | predicted |
| CID443     | PTPN1   | predicted |
| CID443     | LMNA    | predicted |
| CID443     | CYP19A1 | predicted |
| CID443     | SHBG    | predicted |
| CID443     | TNF     | predicted |
| CID443     | MAPT    | predicted |
| CID443     | HSD11B1 | predicted |
| CID443     | TSHR    | predicted |
| CID443     | G6PD    | predicted |
| CID443     | CYP3A4  | predicted |
| CID443     | RAB9A   | predicted |
| CID443     | SMN1    | predicted |

|           |         |           |
|-----------|---------|-----------|
| CID443    | CTSD    | predicted |
| CID443    | AKR1B10 | predicted |
| CID443    | ALOX5   | predicted |
| CID443    | ALDH1A1 | predicted |
| CID443    | NPSR1   | predicted |
| CID443    | SLCO1B3 | predicted |
| CID443    | NPC1    | predicted |
| CID11301  | GPBAR1  | predicted |
| CID11301  | PTPN1   | predicted |
| CID11301  | LMNA    | predicted |
| CID11301  | MAPT    | predicted |
| CID11301  | SHBG    | predicted |
| CID11301  | TSHR    | predicted |
| CID11301  | RAB9A   | predicted |
| CID11301  | CYP3A4  | predicted |
| CID11301  | HSD11B1 | predicted |
| CID11301  | NPC1    | predicted |
| CID11301  | SMN1    | predicted |
| CID11301  | CYP19A1 | predicted |
| CID11301  | SLCO1B1 | predicted |
| CID11301  | TDP1    | predicted |
| CID11301  | SLCO1B3 | predicted |
| CID11301  | ESR1    | predicted |
| CID11301  | AKR1B10 | predicted |
| CID11301  | TNF     | predicted |
| CID11301  | TP53    | predicted |
| CID11301  | MAPK1   | predicted |
| CID586112 | PTPN1   | predicted |
| CID586112 | GPBAR1  | predicted |
| CID586112 | LMNA    | predicted |
| CID586112 | TNF     | predicted |
| CID586112 | SHBG    | predicted |
| CID586112 | CYP19A1 | predicted |
| CID586112 | MAPT    | predicted |
| CID586112 | HSD11B1 | predicted |
| CID586112 | TSHR    | predicted |
| CID586112 | CYP3A4  | predicted |
| CID586112 | G6PD    | predicted |
| CID586112 | RAB9A   | predicted |
| CID586112 | SMN1    | predicted |
| CID586112 | ALOX5   | predicted |
| CID586112 | AKR1B10 | predicted |
| CID586112 | ALDH1A1 | predicted |
| CID586112 | SLCO1B3 | predicted |
| CID586112 | HSD11B2 | predicted |
| CID586112 | SLCO1B1 | predicted |
| CID586112 | NPC1    | predicted |
| CID76     | PTPN1   | predicted |
| CID76     | GPBAR1  | predicted |
| CID76     | LMNA    | predicted |
| CID76     | SHBG    | predicted |
| CID76     | MAPT    | predicted |
| CID76     | CYP19A1 | predicted |
| CID76     | TSHR    | predicted |
| CID76     | G6PD    | predicted |
| CID76     | TNF     | predicted |
| CID76     | HSD11B1 | predicted |
| CID76     | CYP3A4  | predicted |

|             |          |           |
|-------------|----------|-----------|
| CID76       | RAB9A    | predicted |
| CID76       | SMN1     | predicted |
| CID76       | AKR1B10  | predicted |
| CID76       | ALOX5    | predicted |
| CID76       | NPC1     | predicted |
| CID76       | ALDH1A1  | predicted |
| CID76       | TDP1     | predicted |
| CID76       | SLCO1B3  | predicted |
| CID76       | SLCO1B1  | predicted |
| CID11253089 | TSHR     | predicted |
| CID11253089 | LMNA     | predicted |
| CID11253089 | PTPN1    | predicted |
| CID11253089 | MPEG1    | predicted |
| CID11253089 | HMGCR    | predicted |
| CID11253089 | ALOX5    | predicted |
| CID11253089 | MAPT     | predicted |
| CID11253089 | CYP19A1  | predicted |
| CID11253089 | CYP3A4   | predicted |
| CID11253089 | TRPV1    | predicted |
| CID11253089 | PPARG    | predicted |
| CID11253089 | FAAH     | predicted |
| CID11253089 | GPBAR1   | predicted |
| CID11253089 | ALDH1A1  | predicted |
| CID11253089 | ACHE     | predicted |
| CID11253089 | SMN1     | predicted |
| CID11253089 | SHBG     | predicted |
| CID11253089 | TDP1     | predicted |
| CID11253089 | FABP3    | predicted |
| CID11253089 | ALOX15   | predicted |
| CID2193     | PTPN1    | predicted |
| CID2193     | GPBAR1   | predicted |
| CID2193     | LMNA     | predicted |
| CID2193     | SHBG     | predicted |
| CID2193     | CYP19A1  | predicted |
| CID2193     | TNF      | predicted |
| CID2193     | MAPT     | predicted |
| CID2193     | HSD11B1  | predicted |
| CID2193     | TSHR     | predicted |
| CID2193     | G6PD     | predicted |
| CID2193     | CYP3A4   | predicted |
| CID2193     | RAB9A    | predicted |
| CID2193     | ALOX5    | predicted |
| CID2193     | SMN1     | predicted |
| CID2193     | AKR1B10  | predicted |
| CID2193     | ALDH1A1  | predicted |
| CID2193     | HSD11B2  | predicted |
| CID2193     | NPC1     | predicted |
| CID2193     | SLCO1B3  | predicted |
| CID2193     | SLCO1B1  | predicted |
| CID1486     | RECQL    | predicted |
| CID1486     | APEX1    | predicted |
| CID1486     | HPGD     | predicted |
| CID1486     | ALDH1A1  | predicted |
| CID1486     | HSD17B10 | predicted |
| CID1486     | L3MBTL1  | predicted |
| CID1486     | KDM4E    | predicted |
| CID1486     | ALOX15   | predicted |
| CID1486     | MAPT     | predicted |

|           |          |           |
|-----------|----------|-----------|
| CID1486   | TSHR     | predicted |
| CID1486   | BLM      | predicted |
| CID1486   | POLB     | predicted |
| CID1486   | BRCA1    | predicted |
| CID1486   | ABCC1    | predicted |
| CID1486   | LMNA     | predicted |
| CID1486   | TP53     | predicted |
| CID1486   | HIF1A    | predicted |
| CID1486   | MCL1     | predicted |
| CID1486   | USP2     | predicted |
| CID1486   | AHR      | predicted |
| CID1486   | TDP1     | Known     |
| CID4284   | RECQL    | predicted |
| CID4284   | APEX1    | predicted |
| CID4284   | HPGD     | predicted |
| CID4284   | ALDH1A1  | predicted |
| CID4284   | HSD17B10 | predicted |
| CID4284   | L3MBTL1  | predicted |
| CID4284   | KDM4E    | predicted |
| CID4284   | ALOX15   | predicted |
| CID4284   | MAPT     | predicted |
| CID4284   | TSHR     | predicted |
| CID4284   | BLM      | predicted |
| CID4284   | POLB     | predicted |
| CID4284   | BRCA1    | predicted |
| CID4284   | ABCC1    | predicted |
| CID4284   | LMNA     | predicted |
| CID4284   | TP53     | predicted |
| CID4284   | HIF1A    | predicted |
| CID4284   | MCL1     | predicted |
| CID4284   | USP2     | predicted |
| CID4284   | AHR      | predicted |
| CID4284   | TDP1     | Known     |
| CID101708 | LMNA     | predicted |
| CID101708 | PTPN1    | predicted |
| CID101708 | TSHR     | predicted |
| CID101708 | MAPT     | predicted |
| CID101708 | CYP3A4   | predicted |
| CID101708 | ACHE     | predicted |
| CID101708 | ALDH1A1  | predicted |
| CID101708 | RAB9A    | predicted |
| CID101708 | SMN1     | predicted |
| CID101708 | TDP1     | predicted |
| CID101708 | CYP19A1  | predicted |
| CID101708 | ALOX15   | predicted |
| CID101708 | TP53     | predicted |
| CID101708 | GPBAR1   | predicted |
| CID101708 | ALOX5    | predicted |
| CID101708 | NPC1     | predicted |
| CID101708 | KMT2A    | predicted |
| CID101708 | MAPK1    | predicted |
| CID101708 | CNR2     | predicted |
| CID101708 | CNR1     | predicted |
| CID31289  | TSHR     | predicted |
| CID31289  | MPEG1    | predicted |
| CID31289  | FAAH     | predicted |
| CID31289  | HMGCR    | predicted |
| CID31289  | ALOX5    | predicted |

|          |         |           |
|----------|---------|-----------|
| CID31289 | LMNA    | predicted |
| CID31289 | TRPV1   | predicted |
| CID31289 | FABP3   | predicted |
| CID31289 | PPARG   | predicted |
| CID31289 | FNTA    | predicted |
| CID31289 | MAPT    | predicted |
| CID31289 | CNR1    | predicted |
| CID31289 | CNR2    | predicted |
| CID31289 | ALDH1A1 | predicted |
| CID31289 | PPARA   | predicted |
| CID31289 | PTPN1   | predicted |
| CID31289 | PPARD   | predicted |
| CID31289 | CYP3A4  | predicted |
| CID31289 | ACHE    | predicted |
| CID31289 | CCR5    | predicted |
| CID7463  | ACHE    | predicted |
| CID7463  | CYP2A6  | predicted |
| CID7463  | TYR     | predicted |
| CID7463  | LMNA    | predicted |
| CID7463  | CNR2    | predicted |
| CID7463  | CNR1    | predicted |
| CID7463  | TSHR    | predicted |
| CID7463  | MAPT    | predicted |
| CID7463  | TRPA1   | predicted |
| CID7463  | ALDH1A1 | predicted |
| CID7463  | CYP19A1 | predicted |
| CID7463  | PTGS1   | predicted |
| CID7463  | CYP3A4  | predicted |
| CID7463  | TAAR1   | predicted |
| CID7463  | PPARG   | predicted |
| CID7463  | TDP1    | predicted |
| CID7463  | ESR2    | predicted |
| CID7463  | ESR1    | predicted |
| CID7463  | SMN1    | predicted |
| CID7463  | PTPN1   | predicted |
| CID17100 | PTPN1   | predicted |
| CID17100 | LMNA    | predicted |
| CID17100 | CYP3A4  | predicted |
| CID17100 | MAPT    | predicted |
| CID17100 | TSHR    | predicted |
| CID17100 | SMN1    | predicted |
| CID17100 | ACHE    | predicted |
| CID17100 | CNR2    | predicted |
| CID17100 | CYP19A1 | predicted |
| CID17100 | CNR1    | predicted |
| CID17100 | KMT2A   | predicted |
| CID17100 | RAB9A   | predicted |
| CID17100 | ALDH1A1 | predicted |
| CID17100 | MAPK1   | predicted |
| CID17100 | NPC1    | predicted |
| CID17100 | TDP1    | predicted |
| CID17100 | TP53    | predicted |
| CID17100 | BCHE    | predicted |
| CID17100 | GPBAR1  | predicted |
| CID17100 | ALOX15  | predicted |
| CID2758  | PTPN1   | predicted |
| CID2758  | LMNA    | predicted |
| CID2758  | MAPT    | predicted |

|          |          |           |
|----------|----------|-----------|
| CID2758  | CYP3A4   | predicted |
| CID2758  | TSHR     | predicted |
| CID2758  | GPBAR1   | predicted |
| CID2758  | RAB9A    | predicted |
| CID2758  | SMN1     | predicted |
| CID2758  | NPC1     | predicted |
| CID2758  | HSD11B1  | predicted |
| CID2758  | CYP19A1  | predicted |
| CID2758  | MAPK1    | predicted |
| CID2758  | TDP1     | predicted |
| CID2758  | AKR1B10  | predicted |
| CID2758  | SHBG     | predicted |
| CID2758  | ACHE     | predicted |
| CID2758  | KMT2A    | predicted |
| CID2758  | TP53     | predicted |
| CID2758  | ALDH1A1  | predicted |
| CID2758  | SLCO1B1  | predicted |
| CID11005 | PPARD    | predicted |
| CID11005 | FABP2    | predicted |
| CID11005 | PPARG    | predicted |
| CID11005 | FABP5    | predicted |
| CID11005 | FABP4    | predicted |
| CID11005 | FABP3    | predicted |
| CID11005 | OXER1    | predicted |
| CID11005 | RECQL    | predicted |
| CID11005 | FFAR1    | predicted |
| CID11005 | FFAR4    | predicted |
| CID11005 | ALDH1A1  | predicted |
| CID11005 | ALOX15   | predicted |
| CID11005 | HPGD     | predicted |
| CID11005 | HSD17B10 | predicted |
| CID11005 | APEX1    | predicted |
| CID11005 | TSHR     | predicted |
| CID11005 | ABCB11   | predicted |
| CID11005 | L3MBTL1  | predicted |
| CID11005 | MAPT     | predicted |
| CID11005 | KDM4E    | predicted |
| CID11005 | TLR2     | Known     |
| CID11005 | PPARA    | Known     |
| CID11005 | TDP1     | Known     |
| CID13849 | HMGCR    | predicted |
| CID13849 | TSHR     | predicted |
| CID13849 | LMNA     | predicted |
| CID13849 | PPARG    | predicted |
| CID13849 | PPARD    | predicted |
| CID13849 | PPARA    | predicted |
| CID13849 | OXER1    | predicted |
| CID13849 | MPEG1    | predicted |
| CID13849 | FAAH     | predicted |
| CID13849 | FABP3    | predicted |
| CID13849 | ALOX5    | predicted |
| CID13849 | TRPV1    | predicted |
| CID13849 | MAPT     | predicted |
| CID13849 | PTPN1    | predicted |
| CID13849 | PTGIR    | predicted |
| CID13849 | TLR2     | predicted |
| CID13849 | FNTA     | predicted |
| CID13849 | CYP3A4   | predicted |

|              |         |           |
|--------------|---------|-----------|
| CID13849     | TDP1    | predicted |
| CID13849     | NFKB1   | predicted |
| CID28481     | NR1H3   | predicted |
| CID28481     | PRKCD   | predicted |
| CID28481     | PTPN1   | predicted |
| CID28481     | LMNA    | predicted |
| CID28481     | TSHR    | predicted |
| CID28481     | PRKCA   | predicted |
| CID28481     | MAPT    | predicted |
| CID28481     | GPBAR1  | predicted |
| CID28481     | HSD11B1 | predicted |
| CID28481     | XBP1    | predicted |
| CID28481     | CYP3A4  | predicted |
| CID28481     | ESR1    | predicted |
| CID28481     | ESR2    | predicted |
| CID28481     | RAB9A   | predicted |
| CID28481     | NPSR1   | predicted |
| CID28481     | CYP19A1 | predicted |
| CID28481     | SHBG    | predicted |
| CID28481     | SLCO1B3 | predicted |
| CID28481     | SMN1    | predicted |
| CID28481     | SLCO1B1 | predicted |
| CID101967129 | PTPN1   | predicted |
| CID101967129 | LMNA    | predicted |
| CID101967129 | MAPT    | predicted |
| CID101967129 | GPBAR1  | predicted |
| CID101967129 | CYP3A4  | predicted |
| CID101967129 | TSHR    | predicted |
| CID101967129 | HSD11B1 | predicted |
| CID101967129 | RAB9A   | predicted |
| CID101967129 | NPC1    | predicted |
| CID101967129 | SMN1    | predicted |
| CID101967129 | AKR1B10 | predicted |
| CID101967129 | CYP19A1 | predicted |
| CID101967129 | SLCO1B3 | predicted |
| CID101967129 | SLCO1B1 | predicted |
| CID101967129 | TP53    | predicted |
| CID101967129 | SHBG    | predicted |
| CID101967129 | TNF     | predicted |
| CID101967129 | KMT2A   | predicted |
| CID101967129 | MAPK1   | predicted |
| CID101967129 | TDP1    | predicted |
| CID6616      | PTPN1   | predicted |
| CID6616      | MAPT    | predicted |
| CID6616      | LMNA    | predicted |
| CID6616      | GPBAR1  | predicted |
| CID6616      | TSHR    | predicted |
| CID6616      | XBP1    | predicted |
| CID6616      | CYP3A4  | predicted |
| CID6616      | HSD11B1 | predicted |
| CID6616      | SHBG    | predicted |
| CID6616      | RAB9A   | predicted |
| CID6616      | CYP19A1 | predicted |
| CID6616      | ALDH1A1 | predicted |
| CID6616      | TNF     | predicted |
| CID6616      | NPC1    | predicted |
| CID6616      | SLCO1B3 | predicted |
| CID6616      | SMN1    | predicted |

|            |         |           |
|------------|---------|-----------|
| CID6616    | SLCO1B1 | predicted |
| CID6616    | PTPN2   | predicted |
| CID6616    | NR1H3   | predicted |
| CID6616    | KMT2A   | predicted |
| CID5322111 | TSHR    | predicted |
| CID5322111 | PTPN1   | predicted |
| CID5322111 | LMNA    | predicted |
| CID5322111 | CYP3A4  | predicted |
| CID5322111 | MAPT    | predicted |
| CID5322111 | GPBAR1  | predicted |
| CID5322111 | ALDH1A1 | predicted |
| CID5322111 | ACHE    | predicted |
| CID5322111 | SMN1    | predicted |
| CID5322111 | CYP19A1 | predicted |
| CID5322111 | HSD11B1 | predicted |
| CID5322111 | RAB9A   | predicted |
| CID5322111 | KMT2A   | predicted |
| CID5322111 | SHBG    | predicted |
| CID5322111 | TDP1    | predicted |
| CID5322111 | BCHE    | predicted |
| CID5322111 | TP53    | predicted |
| CID5322111 | ALOX5   | predicted |
| CID5322111 | ALOX15  | predicted |
| CID5322111 | MAPK1   | predicted |
| CID6549    | TSHR    | predicted |
| CID6549    | LMNA    | predicted |
| CID6549    | CYP3A4  | predicted |
| CID6549    | PTPN1   | predicted |
| CID6549    | ALDH1A1 | predicted |
| CID6549    | MAPT    | predicted |
| CID6549    | ALOX15  | predicted |
| CID6549    | KMT2A   | predicted |
| CID6549    | CNR2    | predicted |
| CID6549    | TP53    | predicted |
| CID6549    | CNR1    | predicted |
| CID6549    | ACHE    | predicted |
| CID6549    | ALOX5   | predicted |
| CID6549    | SMN1    | predicted |
| CID6549    | TDP1    | predicted |
| CID6549    | BCHE    | predicted |
| CID6549    | CYP19A1 | predicted |
| CID6549    | MAPK1   | predicted |
| CID6549    | PPARG   | predicted |
| CID6549    | NPC1    | predicted |
| CID7461    | TSHR    | predicted |
| CID7461    | LMNA    | predicted |
| CID7461    | PTPN1   | predicted |
| CID7461    | CYP3A4  | predicted |
| CID7461    | MAPT    | predicted |
| CID7461    | ALDH1A1 | predicted |
| CID7461    | ACHE    | predicted |
| CID7461    | ALOX15  | predicted |
| CID7461    | TP53    | predicted |
| CID7461    | NPC1    | predicted |
| CID7461    | KMT2A   | predicted |
| CID7461    | RAB9A   | predicted |
| CID7461    | TDP1    | predicted |
| CID7461    | TYR     | predicted |



|          |          |           |
|----------|----------|-----------|
| CID7461  | ALOX5    | predicted |
| CID7461  | CYP19A1  | predicted |
| CID7461  | SMN1     | predicted |
| CID7461  | PPARG    | predicted |
| CID7461  | CNR2     | predicted |
| CID7461  | MAPK1    | predicted |
| CID64685 | PTPN1    | predicted |
| CID64685 | LMNA     | predicted |
| CID64685 | GPBAR1   | predicted |
| CID64685 | MAPT     | predicted |
| CID64685 | TSHR     | predicted |
| CID64685 | CYP3A4   | predicted |
| CID64685 | HSD11B1  | predicted |
| CID64685 | RAB9A    | predicted |
| CID64685 | SHBG     | predicted |
| CID64685 | SMN1     | predicted |
| CID64685 | NPC1     | predicted |
| CID64685 | XBP1     | predicted |
| CID64685 | TNF      | predicted |
| CID64685 | CYP19A1  | predicted |
| CID64685 | SLCO1B1  | predicted |
| CID64685 | TDP1     | predicted |
| CID64685 | AKR1B10  | predicted |
| CID64685 | SLCO1B3  | predicted |
| CID64685 | ESR1     | predicted |
| CID64685 | KMT2A    | predicted |
| CID3314  | MAPT     | predicted |
| CID3314  | CYP2C19  | predicted |
| CID3314  | HPGD     | predicted |
| CID3314  | MAPK1    | predicted |
| CID3314  | CYP2C9   | predicted |
| CID3314  | CYP2D6   | predicted |
| CID3314  | SMN1     | predicted |
| CID3314  | HSD17B10 | predicted |
| CID3314  | TP53     | predicted |
| CID3314  | ALDH1A1  | predicted |
| CID3314  | LMNA     | predicted |
| CID3314  | KDM4E    | predicted |
| CID3314  | ALOX15   | predicted |
| CID3314  | TSHR     | predicted |
| CID3314  | NFKB1    | predicted |
| CID3314  | THPO     | predicted |
| CID3314  | CYP1A1   | predicted |
| CID3314  | AR       | predicted |
| CID3314  | CYP1A2   | predicted |
| CID3314  | HIF1A    | predicted |
| CID3314  | CYP3A4   | Known     |
| CID10364 | MIF      | predicted |
| CID10364 | PTGS2    | predicted |
| CID10364 | ALDH1A1  | predicted |
| CID10364 | STK33    | predicted |
| CID10364 | PDE4B    | predicted |
| CID10364 | CYP2E1   | predicted |
| CID10364 | ALOX5    | predicted |
| CID10364 | LMNA     | predicted |
| CID10364 | CTSL     | predicted |
| CID10364 | CTSB     | predicted |
| CID10364 | FASN     | predicted |

|            |         |           |
|------------|---------|-----------|
| CID10364   | TRPV1   | predicted |
| CID10364   | PDE4D   | predicted |
| CID10364   | ITGA2B  | predicted |
| CID10364   | HPGD    | predicted |
| CID10364   | CYP2A13 | predicted |
| CID10364   | SLC5A2  | predicted |
| CID10364   | TERT    | predicted |
| CID10364   | BCR     | predicted |
| CID10364   | ITGB3   | predicted |
| CID10364   | TRPA1   | Known     |
| CID10364   | PTGS1   | Known     |
| CID11463   | PTPN1   | predicted |
| CID11463   | LMNA    | predicted |
| CID11463   | TSHR    | predicted |
| CID11463   | MAPT    | predicted |
| CID11463   | CYP3A4  | predicted |
| CID11463   | ACHE    | predicted |
| CID11463   | ALDH1A1 | predicted |
| CID11463   | ALOX5   | predicted |
| CID11463   | TP53    | predicted |
| CID11463   | SMN1    | predicted |
| CID11463   | ALOX15  | predicted |
| CID11463   | KMT2A   | predicted |
| CID11463   | TDP1    | predicted |
| CID11463   | MAPK1   | predicted |
| CID11463   | CNR2    | predicted |
| CID11463   | CYP19A1 | predicted |
| CID11463   | RAB9A   | predicted |
| CID11463   | CNR1    | predicted |
| CID11463   | PPARG   | predicted |
| CID11463   | GPBAR1  | predicted |
| CID86821   | PTPN1   | predicted |
| CID86821   | LMNA    | predicted |
| CID86821   | GPBAR1  | predicted |
| CID86821   | TSHR    | predicted |
| CID86821   | MAPT    | predicted |
| CID86821   | CYP3A4  | predicted |
| CID86821   | RAB9A   | predicted |
| CID86821   | SHBG    | predicted |
| CID86821   | HSD11B1 | predicted |
| CID86821   | SMN1    | predicted |
| CID86821   | NPC1    | predicted |
| CID86821   | CYP19A1 | predicted |
| CID86821   | TDP1    | predicted |
| CID86821   | TP53    | predicted |
| CID86821   | MAPK1   | predicted |
| CID86821   | SLCO1B3 | predicted |
| CID86821   | SLCO1B1 | predicted |
| CID86821   | TNF     | predicted |
| CID86821   | ALDH1A1 | predicted |
| CID86821   | KMT2A   | predicted |
| CID5364569 | PTPN1   | predicted |
| CID5364569 | LMNA    | predicted |
| CID5364569 | GPBAR1  | predicted |
| CID5364569 | TSHR    | predicted |
| CID5364569 | MAPT    | predicted |
| CID5364569 | CYP3A4  | predicted |
| CID5364569 | RAB9A   | predicted |

|            |         |           |
|------------|---------|-----------|
| CID5364569 | SHBG    | predicted |
| CID5364569 | SMN1    | predicted |
| CID5364569 | NPC1    | predicted |
| CID5364569 | HSD11B1 | predicted |
| CID5364569 | CYP19A1 | predicted |
| CID5364569 | TDP1    | predicted |
| CID5364569 | TP53    | predicted |
| CID5364569 | ALDH1A1 | predicted |
| CID5364569 | MAPK1   | predicted |
| CID5364569 | SLCO1B3 | predicted |
| CID5364569 | SLCO1B1 | predicted |
| CID5364569 | KMT2A   | predicted |
| CID5364569 | ACHE    | predicted |
| CID5281517 | TSHR    | predicted |
| CID5281517 | ALDH1A1 | predicted |
| CID5281517 | PTPN1   | predicted |
| CID5281517 | ALOX15  | predicted |
| CID5281517 | CYP3A4  | predicted |
| CID5281517 | ALOX5   | predicted |
| CID5281517 | LMNA    | predicted |
| CID5281517 | TRPA1   | predicted |
| CID5281517 | MAPT    | predicted |
| CID5281517 | CNR2    | predicted |
| CID5281517 | TP53    | predicted |
| CID5281517 | ACHE    | predicted |
| CID5281517 | KMT2A   | predicted |
| CID5281517 | CNR1    | predicted |
| CID5281517 | PPARG   | predicted |
| CID5281517 | PPARA   | predicted |
| CID5281517 | ABCG2   | predicted |
| CID5281517 | TDP1    | predicted |
| CID5281517 | BCHE    | predicted |
| CID5281517 | MAOB    | predicted |
| CID14350   | PTPN1   | predicted |
| CID14350   | LMNA    | predicted |
| CID14350   | TSHR    | predicted |
| CID14350   | CYP3A4  | predicted |
| CID14350   | MAPT    | predicted |
| CID14350   | GPBAR1  | predicted |
| CID14350   | SMN1    | predicted |
| CID14350   | RAB9A   | predicted |
| CID14350   | CYP19A1 | predicted |
| CID14350   | NPC1    | predicted |
| CID14350   | TDP1    | predicted |
| CID14350   | HSD11B1 | predicted |
| CID14350   | SHBG    | predicted |
| CID14350   | ALDH1A1 | predicted |
| CID14350   | KMT2A   | predicted |
| CID14350   | TP53    | predicted |
| CID14350   | MAPK1   | predicted |
| CID14350   | ACHE    | predicted |
| CID14350   | XBP1    | predicted |
| CID14350   | BCHE    | predicted |
| CID11230   | LMNA    | predicted |
| CID11230   | PTPN1   | predicted |
| CID11230   | TSHR    | predicted |
| CID11230   | MAPT    | predicted |
| CID11230   | CYP3A4  | predicted |

|           |         |           |
|-----------|---------|-----------|
| CID11230  | ACHE    | predicted |
| CID11230  | SMN1    | predicted |
| CID11230  | RAB9A   | predicted |
| CID11230  | ALDH1A1 | predicted |
| CID11230  | NPC1    | predicted |
| CID11230  | KMT2A   | predicted |
| CID11230  | TDP1    | predicted |
| CID11230  | TP53    | predicted |
| CID11230  | CYP19A1 | predicted |
| CID11230  | ALOX15  | predicted |
| CID11230  | MAPK1   | predicted |
| CID11230  | CNR2    | predicted |
| CID11230  | CNR1    | predicted |
| CID11230  | GPBAR1  | predicted |
| CID11230  | ALOX5   | predicted |
| CID521207 | PTPN1   | predicted |
| CID521207 | LMNA    | predicted |
| CID521207 | GPBAR1  | predicted |
| CID521207 | MAPT    | predicted |
| CID521207 | TSHR    | predicted |
| CID521207 | HSD11B1 | predicted |
| CID521207 | ACHE    | predicted |
| CID521207 | CYP3A4  | predicted |
| CID521207 | TNF     | predicted |
| CID521207 | RAB9A   | predicted |
| CID521207 | NR1H3   | predicted |
| CID521207 | SLCO1B3 | predicted |
| CID521207 | SLCO1B1 | predicted |
| CID521207 | HSD11B2 | predicted |
| CID521207 | XBP1    | predicted |
| CID521207 | CYP19A1 | predicted |
| CID521207 | SHBG    | predicted |
| CID521207 | PTPN2   | predicted |
| CID521207 | NPC1    | predicted |
| CID521207 | SMN1    | predicted |
| CID10223  | LMNA    | predicted |
| CID10223  | PTPN1   | predicted |
| CID10223  | TSHR    | predicted |
| CID10223  | MAPT    | predicted |
| CID10223  | CYP3A4  | predicted |
| CID10223  | ACHE    | predicted |
| CID10223  | ALDH1A1 | predicted |
| CID10223  | RAB9A   | predicted |
| CID10223  | SMN1    | predicted |
| CID10223  | TDP1    | predicted |
| CID10223  | CYP19A1 | predicted |
| CID10223  | ALOX15  | predicted |
| CID10223  | TP53    | predicted |
| CID10223  | GPBAR1  | predicted |
| CID10223  | ALOX5   | predicted |
| CID10223  | NPC1    | predicted |
| CID10223  | KMT2A   | predicted |
| CID10223  | MAPK1   | predicted |
| CID10223  | CNR2    | predicted |
| CID10223  | CNR1    | predicted |
| CID3026   | TSHR    | predicted |
| CID3026   | LMNA    | predicted |
| CID3026   | CYP3A4  | predicted |

|         |          |           |
|---------|----------|-----------|
| CID3026 | MAPT     | predicted |
| CID3026 | SMN1     | predicted |
| CID3026 | CYP2C19  | predicted |
| CID3026 | ALDH1A1  | predicted |
| CID3026 | TP53     | predicted |
| CID3026 | IDO1     | predicted |
| CID3026 | HPGD     | predicted |
| CID3026 | ACHE     | predicted |
| CID3026 | CDC25B   | predicted |
| CID3026 | TDP1     | predicted |
| CID3026 | BCL2     | predicted |
| CID3026 | CA2      | predicted |
| CID3026 | CA1      | predicted |
| CID3026 | RAB9A    | predicted |
| CID3026 | CA9      | predicted |
| CID3026 | MAPK1    | predicted |
| CID3026 | KMT2A    | predicted |
| CID985  | PPARG    | predicted |
| CID985  | FABP1    | predicted |
| CID985  | FFAR1    | predicted |
| CID985  | FFAR4    | predicted |
| CID985  | OXER1    | predicted |
| CID985  | FAAH     | predicted |
| CID985  | TERT     | predicted |
| CID985  | TDP1     | predicted |
| CID985  | ALOX15   | predicted |
| CID985  | SLCO1B3  | predicted |
| CID985  | SLCO1B1  | predicted |
| CID985  | USP2     | predicted |
| CID985  | RECQL    | predicted |
| CID985  | HPGD     | predicted |
| CID985  | ALDH1A1  | predicted |
| CID985  | TSHR     | predicted |
| CID985  | HSD17B10 | predicted |
| CID985  | LMNA     | predicted |
| CID985  | CYP3A4   | predicted |
| CID985  | ABCB11   | predicted |
| CID985  | TLR2     | Known     |
| CID985  | FABP3    | Known     |
| CID985  | FABP2    | Known     |
| CID985  | PPARA    | Known     |
| CID985  | FABP5    | Known     |
| CID985  | FABP4    | Known     |
| CID985  | PPARD    | Known     |
| CID5281 | PPARG    | predicted |
| CID5281 | OXER1    | predicted |
| CID5281 | FABP4    | predicted |
| CID5281 | FABP5    | predicted |
| CID5281 | TLR2     | predicted |
| CID5281 | FABP3    | predicted |
| CID5281 | FFAR1    | predicted |
| CID5281 | FFAR4    | predicted |
| CID5281 | FABP2    | predicted |
| CID5281 | FABP1    | predicted |
| CID5281 | LMNA     | predicted |
| CID5281 | FAAH     | predicted |
| CID5281 | ALOX15   | predicted |
| CID5281 | ABCB11   | predicted |

|          |         |           |
|----------|---------|-----------|
| CID5281  | TBXAS1  | predicted |
| CID5281  | TP53    | predicted |
| CID5281  | TDP1    | predicted |
| CID5281  | CYP3A4  | predicted |
| CID5281  | TERT    | predicted |
| CID5281  | SLCO1B3 | predicted |
| CID5281  | PPARA   | Known     |
| CID5281  | PPARD   | Known     |
| CID5281  | TSHR    | Known     |
| CID12398 | TSHR    | predicted |
| CID12398 | MPEG1   | predicted |
| CID12398 | HMGCR   | predicted |
| CID12398 | FAAH    | predicted |
| CID12398 | ALOX5   | predicted |
| CID12398 | TRPV1   | predicted |
| CID12398 | LMNA    | predicted |
| CID12398 | CNR2    | predicted |
| CID12398 | CNR1    | predicted |
| CID12398 | FABP3   | predicted |
| CID12398 | FNTA    | predicted |
| CID12398 | PPARG   | predicted |
| CID12398 | PPARA   | predicted |
| CID12398 | CCR5    | predicted |
| CID12398 | PPARD   | predicted |
| CID12398 | MAPT    | predicted |
| CID12398 | SAE1    | predicted |
| CID12398 | SHBG    | predicted |
| CID12398 | ACHE    | predicted |
| CID12398 | PTPN1   | predicted |
| CID8181  | TSHR    | predicted |
| CID8181  | LMNA    | predicted |
| CID8181  | HMGCR   | predicted |
| CID8181  | MPEG1   | predicted |
| CID8181  | FAAH    | predicted |
| CID8181  | PPARG   | predicted |
| CID8181  | ALOX5   | predicted |
| CID8181  | MAPT    | predicted |
| CID8181  | TRPV1   | predicted |
| CID8181  | CYP3A4  | predicted |
| CID8181  | PTPN1   | predicted |
| CID8181  | FABP3   | predicted |
| CID8181  | ALDH1A1 | predicted |
| CID8181  | PPARA   | predicted |
| CID8181  | PPARD   | predicted |
| CID8181  | SMN1    | predicted |
| CID8181  | ACHE    | predicted |
| CID8181  | TDP1    | predicted |
| CID8181  | FNTA    | predicted |
| CID8181  | CNR1    | predicted |
| CID10583 | PTPN1   | predicted |
| CID10583 | TSHR    | predicted |
| CID10583 | LMNA    | predicted |
| CID10583 | GPBAR1  | predicted |
| CID10583 | MAPT    | predicted |
| CID10583 | CYP3A4  | predicted |
| CID10583 | TP53    | predicted |
| CID10583 | ALDH1A1 | predicted |
| CID10583 | HSD11B1 | predicted |

|            |         |           |
|------------|---------|-----------|
| CID10583   | TRPA1   | predicted |
| CID10583   | SLCO1B3 | predicted |
| CID10583   | RAB9A   | predicted |
| CID10583   | SHBG    | predicted |
| CID10583   | SLCO1B1 | predicted |
| CID10583   | CYP19A1 | predicted |
| CID10583   | SMN1    | predicted |
| CID10583   | CNR2    | predicted |
| CID10583   | NPC1    | predicted |
| CID10583   | TDP1    | predicted |
| CID10583   | ALOX5   | predicted |
| CID7462    | TSHR    | predicted |
| CID7462    | LMNA    | predicted |
| CID7462    | MAPT    | predicted |
| CID7462    | PTPN1   | predicted |
| CID7462    | CYP3A4  | predicted |
| CID7462    | RAB9A   | predicted |
| CID7462    | TDP1    | predicted |
| CID7462    | ALDH1A1 | predicted |
| CID7462    | OPRM1   | predicted |
| CID7462    | ALOX15  | predicted |
| CID7462    | ACHE    | predicted |
| CID7462    | TP53    | predicted |
| CID7462    | NPC1    | predicted |
| CID7462    | SMN1    | predicted |
| CID7462    | KMT2A   | predicted |
| CID7462    | HSF1    | predicted |
| CID7462    | CYP19A1 | predicted |
| CID7462    | CNR2    | predicted |
| CID7462    | MAPK1   | predicted |
| CID7462    | TYR     | predicted |
| CID736681  | MAOA    | predicted |
| CID736681  | IDO1    | predicted |
| CID736681  | CYP19A1 | predicted |
| CID736681  | PLIN5   | predicted |
| CID736681  | PLIN1   | predicted |
| CID736681  | CDC25B  | predicted |
| CID736681  | SMN1    | predicted |
| CID736681  | MAP2K1  | predicted |
| CID736681  | ABCB11  | predicted |
| CID736681  | HTR3A   | predicted |
| CID736681  | HTR5A   | predicted |
| CID736681  | CA13    | predicted |
| CID736681  | RECQL   | predicted |
| CID736681  | HTR2B   | predicted |
| CID736681  | HTR2C   | predicted |
| CID736681  | HTR6    | predicted |
| CID736681  | PPARA   | predicted |
| CID736681  | NQO1    | predicted |
| CID736681  | TRPV1   | predicted |
| CID736681  | CA7     | predicted |
| CID736681  | MAOB    | Known     |
| CID1550239 | LMNA    | predicted |
| CID1550239 | THRB    | predicted |
| CID1550239 | MGAM    | predicted |
| CID1550239 | TSHR    | predicted |
| CID1550239 | CYP2C19 | predicted |
| CID1550239 | MAN2B1  | predicted |

|            |          |           |
|------------|----------|-----------|
| CID1550239 | CYP2D6   | predicted |
| CID1550239 | CYP3A4   | predicted |
| CID1550239 | SMN1     | predicted |
| CID1550239 | AGL      | predicted |
| CID1550239 | CHRNA2   | predicted |
| CID1550239 | BCHE     | predicted |
| CID1550239 | TDP1     | predicted |
| CID1550239 | KMT2A    | predicted |
| CID1550239 | HTR2C    | predicted |
| CID1550239 | MAPT     | predicted |
| CID1550239 | CHRFAM7A | predicted |
| CID1550239 | ACHE     | predicted |
| CID1550239 | BLM      | predicted |
| CID1550239 | CHRM2    | predicted |
| CID5988    | LMNA     | predicted |
| CID5988    | IL2      | predicted |
| CID5988    | AKR1B1   | predicted |
| CID5988    | HSP90AA1 | predicted |
| CID5988    | SMN1     | predicted |
| CID5988    | TDP1     | predicted |
| CID5988    | CYP3A4   | predicted |
| CID5988    | MAPT     | predicted |
| CID5988    | RAB9A    | predicted |
| CID5988    | L3MBTL1  | predicted |
| CID5988    | NPC1     | predicted |
| CID5988    | POLB     | predicted |
| CID5988    | TSHR     | predicted |
| CID5988    | APEX1    | predicted |
| CID5988    | PSIP1    | predicted |
| CID5988    | TNF      | predicted |
| CID5988    | GAA      | predicted |
| CID5988    | PTPN1    | predicted |
| CID5988    | CYP19A1  | predicted |
| CID5988    | BACE1    | predicted |
| CID5282149 | MAPT     | predicted |
| CID5282149 | CYP3A4   | predicted |
| CID5282149 | ABCG2    | predicted |
| CID5282149 | RAB9A    | predicted |
| CID5282149 | NPC1     | predicted |
| CID5282149 | LMNA     | predicted |
| CID5282149 | CYP19A1  | predicted |
| CID5282149 | POLB     | predicted |
| CID5282149 | AKR1B1   | predicted |
| CID5282149 | TDP1     | predicted |
| CID5282149 | APEX1    | predicted |
| CID5282149 | IL2      | predicted |
| CID5282149 | SMN1     | predicted |
| CID5282149 | KMT2A    | predicted |
| CID5282149 | MAPK1    | predicted |
| CID5282149 | L3MBTL1  | predicted |
| CID5282149 | BACE1    | predicted |
| CID5282149 | ALDH1A1  | predicted |
| CID5282149 | KDM4E    | predicted |
| CID5282149 | PTPN1    | predicted |
| CID5927076 | LMNA     | predicted |
| CID5927076 | MAPT     | predicted |
| CID5927076 | CYP3A4   | predicted |
| CID5927076 | PTPN1    | predicted |



|             |         |           |
|-------------|---------|-----------|
| CID5927076  | AKR1B10 | predicted |
| CID5927076  | SMN1    | predicted |
| CID5927076  | TSHR    | predicted |
| CID5927076  | TDP1    | predicted |
| CID5927076  | RAB9A   | predicted |
| CID5927076  | AKR1B1  | predicted |
| CID5927076  | NPC1    | predicted |
| CID5927076  | KMT2A   | predicted |
| CID5927076  | TP53    | predicted |
| CID5927076  | CYP19A1 | predicted |
| CID5927076  | KDM4E   | predicted |
| CID5927076  | ALDH1A1 | predicted |
| CID5927076  | CA9     | predicted |
| CID5927076  | NFKB1   | predicted |
| CID5927076  | CA1     | predicted |
| CID5927076  | POLB    | predicted |
| CID13604687 | LMNA    | predicted |
| CID13604687 | MAPT    | predicted |
| CID13604687 | CYP3A4  | predicted |
| CID13604687 | PTPN1   | predicted |
| CID13604687 | AKR1B10 | predicted |
| CID13604687 | SMN1    | predicted |
| CID13604687 | TSHR    | predicted |
| CID13604687 | TDP1    | predicted |
| CID13604687 | AKR1B1  | predicted |
| CID13604687 | RAB9A   | predicted |
| CID13604687 | NPC1    | predicted |
| CID13604687 | KMT2A   | predicted |
| CID13604687 | TP53    | predicted |
| CID13604687 | CYP19A1 | predicted |
| CID13604687 | KDM4E   | predicted |
| CID13604687 | ALDH1A1 | predicted |
| CID13604687 | CA9     | predicted |
| CID13604687 | CA1     | predicted |
| CID13604687 | NFKB1   | predicted |
| CID13604687 | POLB    | predicted |
| CID5315599  | LMNA    | predicted |
| CID5315599  | MAPT    | predicted |
| CID5315599  | CYP3A4  | predicted |
| CID5315599  | PTPN1   | predicted |
| CID5315599  | AKR1B10 | predicted |
| CID5315599  | SMN1    | predicted |
| CID5315599  | TSHR    | predicted |
| CID5315599  | TDP1    | predicted |
| CID5315599  | RAB9A   | predicted |
| CID5315599  | AKR1B1  | predicted |
| CID5315599  | NPC1    | predicted |
| CID5315599  | KMT2A   | predicted |
| CID5315599  | TP53    | predicted |
| CID5315599  | CYP19A1 | predicted |
| CID5315599  | KDM4E   | predicted |
| CID5315599  | ALDH1A1 | predicted |
| CID5315599  | CA9     | predicted |
| CID5315599  | NFKB1   | predicted |
| CID5315599  | CA1     | predicted |
| CID5315599  | POLB    | predicted |
| CID586922   | PTPN1   | predicted |
| CID586922   | LMNA    | predicted |

|            |         |           |
|------------|---------|-----------|
| CID586922  | GPBAR1  | predicted |
| CID586922  | MAPT    | predicted |
| CID586922  | CYP3A4  | predicted |
| CID586922  | TSHR    | predicted |
| CID586922  | RAB9A   | predicted |
| CID586922  | SHBG    | predicted |
| CID586922  | SMN1    | predicted |
| CID586922  | NPC1    | predicted |
| CID586922  | HSD11B1 | predicted |
| CID586922  | SLCO1B1 | predicted |
| CID586922  | SLCO1B3 | predicted |
| CID586922  | TDP1    | predicted |
| CID586922  | CYP19A1 | predicted |
| CID586922  | TNF     | predicted |
| CID586922  | MAPK1   | predicted |
| CID586922  | TP53    | predicted |
| CID586922  | AKR1B10 | predicted |
| CID586922  | IL2     | predicted |
| CID12127   | MAPT    | predicted |
| CID12127   | CYP3A4  | predicted |
| CID12127   | ABCG2   | predicted |
| CID12127   | RAB9A   | predicted |
| CID12127   | TDP1    | predicted |
| CID12127   | NPC1    | predicted |
| CID12127   | ALDH1A1 | predicted |
| CID12127   | MAOA    | predicted |
| CID12127   | CYP19A1 | predicted |
| CID12127   | KDM4E   | predicted |
| CID12127   | TSHR    | predicted |
| CID12127   | LMNA    | predicted |
| CID12127   | MAPK1   | predicted |
| CID12127   | TP53    | predicted |
| CID12127   | ACHE    | predicted |
| CID12127   | ALOX15  | predicted |
| CID12127   | CTSV    | predicted |
| CID12127   | KMT2A   | predicted |
| CID12127   | CA12    | predicted |
| CID12127   | CA9     | predicted |
| CID5317848 | LMNA    | predicted |
| CID5317848 | TSHR    | predicted |
| CID5317848 | TAAR1   | predicted |
| CID5317848 | SMN1    | predicted |
| CID5317848 | HTR3A   | predicted |
| CID5317848 | CYP2C19 | predicted |
| CID5317848 | HTR2C   | predicted |
| CID5317848 | NFKB1   | predicted |
| CID5317848 | MAPT    | predicted |
| CID5317848 | MAOA    | predicted |
| CID5317848 | ALDH1A1 | predicted |
| CID5317848 | CYP2C9  | predicted |
| CID5317848 | THRB    | predicted |
| CID5317848 | PARP1   | predicted |
| CID5317848 | ACHE    | predicted |
| CID5317848 | CYP3A4  | predicted |
| CID5317848 | MAPK1   | predicted |
| CID5317848 | CYP2D6  | predicted |
| CID5317848 | CPB1    | predicted |
| CID5317848 | ALOX15  | predicted |

|            |         |           |
|------------|---------|-----------|
| CID5283469 | LMNA    | predicted |
| CID5283469 | TSHR    | predicted |
| CID5283469 | FAAH    | predicted |
| CID5283469 | CYP3A4  | predicted |
| CID5283469 | MAPT    | predicted |
| CID5283469 | HMGCR   | predicted |
| CID5283469 | PPARG   | predicted |
| CID5283469 | SMN1    | predicted |
| CID5283469 | TDP1    | predicted |
| CID5283469 | PTPN1   | predicted |
| CID5283469 | MAPK1   | predicted |
| CID5283469 | ALDH1A1 | predicted |
| CID5283469 | TRPV1   | predicted |
| CID5283469 | MPEG1   | predicted |
| CID5283469 | KMT2A   | predicted |
| CID5283469 | THRB    | predicted |
| CID5283469 | ALOX5   | predicted |
| CID5283469 | RAB9A   | predicted |
| CID5283469 | ACHE    | predicted |
| CID5283469 | CNR1    | predicted |
| CID4473086 | TSHR    | predicted |
| CID4473086 | LMNA    | predicted |
| CID4473086 | ALDH1A1 | predicted |
| CID4473086 | BLM     | predicted |
| CID4473086 | TDP1    | predicted |
| CID4473086 | MAPT    | predicted |
| CID4473086 | CYP19A1 | predicted |
| CID4473086 | CYP3A4  | predicted |
| CID4473086 | SMN1    | predicted |
| CID4473086 | MAPK1   | predicted |
| CID4473086 | EGLN1   | predicted |
| CID4473086 | KMT2A   | predicted |
| CID4473086 | RAB9A   | predicted |
| CID4473086 | PTPN1   | predicted |
| CID4473086 | NFKB1   | predicted |
| CID4473086 | TAAR1   | predicted |
| CID4473086 | HMGCR   | predicted |
| CID4473086 | PPARG   | predicted |
| CID4473086 | CYP2C19 | predicted |
| CID4473086 | NPC1    | predicted |
| CID8655    | MAPT    | predicted |
| CID8655    | CYP3A4  | predicted |
| CID8655    | ABCG2   | predicted |
| CID8655    | ALDH1A1 | predicted |
| CID8655    | TDP1    | predicted |
| CID8655    | MAOA    | predicted |
| CID8655    | RAB9A   | predicted |
| CID8655    | BACE1   | predicted |
| CID8655    | NPC1    | predicted |
| CID8655    | CYP19A1 | predicted |
| CID8655    | KDM4E   | predicted |
| CID8655    | ABCB1   | predicted |
| CID8655    | CTSV    | predicted |
| CID8655    | LMNA    | predicted |
| CID8655    | KMT2A   | predicted |
| CID8655    | TP53    | predicted |
| CID8655    | MAPK1   | predicted |
| CID8655    | CA9     | predicted |

|             |          |           |
|-------------|----------|-----------|
| CID8655     | CA12     | predicted |
| CID8655     | ACHE     | predicted |
| CID72704    | CYP3A4   | predicted |
| CID72704    | MAPT     | predicted |
| CID72704    | LMNA     | predicted |
| CID72704    | ACHE     | predicted |
| CID72704    | SMN1     | predicted |
| CID72704    | F3       | predicted |
| CID72704    | CYP2C19  | predicted |
| CID72704    | DRD1     | predicted |
| CID72704    | NPC1     | predicted |
| CID72704    | RAB9A    | predicted |
| CID72704    | CYP2D6   | predicted |
| CID72704    | TP53     | predicted |
| CID72704    | TDP1     | predicted |
| CID72704    | KDM4E    | predicted |
| CID72704    | ABCG2    | predicted |
| CID72704    | TSHR     | predicted |
| CID72704    | ALDH1A1  | predicted |
| CID72704    | UBE2I    | predicted |
| CID72704    | CYP19A1  | predicted |
| CID72704    | MAPK1    | predicted |
| CID10034991 | CYP3A4   | predicted |
| CID10034991 | MAPT     | predicted |
| CID10034991 | TSHR     | predicted |
| CID10034991 | ABCG2    | predicted |
| CID10034991 | LMNA     | predicted |
| CID10034991 | TDP1     | predicted |
| CID10034991 | ALDH1A1  | predicted |
| CID10034991 | ALOX15   | predicted |
| CID10034991 | RAB9A    | predicted |
| CID10034991 | MAPK1    | predicted |
| CID10034991 | NPC1     | predicted |
| CID10034991 | CYP19A1  | predicted |
| CID10034991 | ACHE     | predicted |
| CID10034991 | SMN1     | predicted |
| CID10034991 | KDM4E    | predicted |
| CID10034991 | TAAR1    | predicted |
| CID10034991 | TP53     | predicted |
| CID10034991 | KMT2A    | predicted |
| CID10034991 | HSD17B10 | predicted |
| CID10034991 | PTPN1    | predicted |
| CID3084288  | CYP3A4   | predicted |
| CID3084288  | MAPT     | predicted |
| CID3084288  | LMNA     | predicted |
| CID3084288  | ACHE     | predicted |
| CID3084288  | SMN1     | predicted |
| CID3084288  | F3       | predicted |
| CID3084288  | CYP2C19  | predicted |
| CID3084288  | DRD1     | predicted |
| CID3084288  | NPC1     | predicted |
| CID3084288  | RAB9A    | predicted |
| CID3084288  | CYP2D6   | predicted |
| CID3084288  | TP53     | predicted |
| CID3084288  | TDP1     | predicted |
| CID3084288  | KDM4E    | predicted |
| CID3084288  | ABCG2    | predicted |
| CID3084288  | TSHR     | predicted |

|            |          |           |
|------------|----------|-----------|
| CID3084288 | ALDH1A1  | predicted |
| CID3084288 | UBE2I    | predicted |
| CID3084288 | CYP19A1  | predicted |
| CID3084288 | MAPK1    | predicted |
| CID5417    | DRD2     | predicted |
| CID5417    | ALDH2    | predicted |
| CID5417    | DRD5     | predicted |
| CID5417    | HSD11B1  | predicted |
| CID5417    | CASP9    | predicted |
| CID5417    | SIGMAR1  | predicted |
| CID5417    | DRD3     | predicted |
| CID5417    | DRD4     | predicted |
| CID5417    | HTR1A    | predicted |
| CID5417    | CYP2D6   | predicted |
| CID5417    | MAPT     | predicted |
| CID5417    | CYP2C9   | predicted |
| CID5417    | KMT2A    | predicted |
| CID5417    | HTR4     | predicted |
| CID5417    | CYP2C19  | predicted |
| CID5417    | ANPEP    | predicted |
| CID5417    | HTR3A    | predicted |
| CID5417    | DOP2R    | predicted |
| CID5417    | LMNA     | predicted |
| CID5417    | HTR5A    | predicted |
| CID5417    | F3       | Known     |
| CID5417    | DRD1     | Known     |
| CID72323   | MAPT     | predicted |
| CID72323   | POLB     | predicted |
| CID72323   | ALDH1A1  | predicted |
| CID72323   | HSD17B10 | predicted |
| CID72323   | HCAR2    | predicted |
| CID72323   | HPGD     | predicted |
| CID72323   | KDM4E    | predicted |
| CID72323   | CYP2C19  | predicted |
| CID72323   | TP53     | predicted |
| CID72323   | MAPK1    | predicted |
| CID72323   | KMT2A    | predicted |
| CID72323   | LMNA     | predicted |
| CID72323   | CASP1    | predicted |
| CID72323   | CYP2D6   | predicted |
| CID72323   | THPO     | predicted |
| CID72323   | CYP2C9   | predicted |
| CID72323   | NFKB1    | predicted |
| CID72323   | NPC1     | predicted |
| CID72323   | TDP1     | predicted |
| CID72323   | ALPL     | predicted |
| CID72323   | GAA      | Known     |
| CID72323   | SMN1     | Known     |
| CID72323   | CYP3A4   | Known     |
| CID5303    | PTPN1    | predicted |
| CID5303    | LMNA     | predicted |
| CID5303    | GPBAR1   | predicted |
| CID5303    | MAPT     | predicted |
| CID5303    | RAB9A    | predicted |
| CID5303    | CYP3A4   | predicted |
| CID5303    | TSHR     | predicted |
| CID5303    | NPC1     | predicted |
| CID5303    | SMN1     | predicted |

|            |          |           |
|------------|----------|-----------|
| CID5303    | AKR1B10  | predicted |
| CID5303    | HSD11B1  | predicted |
| CID5303    | TDP1     | predicted |
| CID5303    | CYP19A1  | predicted |
| CID5303    | SHBG     | predicted |
| CID5303    | TP53     | predicted |
| CID5303    | ALDH1A1  | predicted |
| CID5303    | KMT2A    | predicted |
| CID5303    | SLCO1B1  | predicted |
| CID5303    | NPSR1    | predicted |
| CID5303    | SLCO1B3  | predicted |
| CID73296   | PTPN1    | predicted |
| CID73296   | LMNA     | predicted |
| CID73296   | MAPT     | predicted |
| CID73296   | CYP3A4   | predicted |
| CID73296   | GPBAR1   | predicted |
| CID73296   | TSHR     | predicted |
| CID73296   | SMN1     | predicted |
| CID73296   | HSD11B1  | predicted |
| CID73296   | RAB9A    | predicted |
| CID73296   | TDP1     | predicted |
| CID73296   | TNF      | predicted |
| CID73296   | AKR1B10  | predicted |
| CID73296   | NPC1     | predicted |
| CID73296   | CYP19A1  | predicted |
| CID73296   | SHBG     | predicted |
| CID73296   | POLB     | predicted |
| CID73296   | AKR1B1   | predicted |
| CID73296   | PTPN2    | predicted |
| CID73296   | SLCO1B3  | predicted |
| CID73296   | SLCO1B1  | predicted |
| CID8141    | LMNA     | predicted |
| CID8141    | TP53     | predicted |
| CID8141    | LTA4H    | predicted |
| CID8141    | TBXAS1   | predicted |
| CID8141    | NFKB1    | predicted |
| CID8141    | DAO      | predicted |
| CID8141    | THPO     | predicted |
| CID8141    | CYP2C19  | predicted |
| CID8141    | TDP1     | predicted |
| CID8141    | CYP3A4   | predicted |
| CID8141    | HPGD     | predicted |
| CID8141    | HSD17B10 | predicted |
| CID8141    | ALOX15   | predicted |
| CID8141    | CYP2D6   | predicted |
| CID8141    | MAPK1    | predicted |
| CID8141    | HIF1A    | predicted |
| CID8141    | NPSR1    | predicted |
| CID8141    | CYP1A2   | predicted |
| CID8141    | ALDH1A1  | predicted |
| CID8141    | MAPT     | predicted |
| CID8141    | TSHR     | Known     |
| CID4177125 | CYP3A4   | predicted |
| CID4177125 | MAPT     | predicted |
| CID4177125 | LMNA     | predicted |
| CID4177125 | SLCO2B1  | predicted |
| CID4177125 | CYP19A1  | predicted |
| CID4177125 | PTPN1    | predicted |

|            |         |           |
|------------|---------|-----------|
| CID4177125 | TDP1    | predicted |
| CID4177125 | TSHR    | predicted |
| CID4177125 | ACHE    | predicted |
| CID4177125 | RAB9A   | predicted |
| CID4177125 | SMN1    | predicted |
| CID4177125 | ALDH1A1 | predicted |
| CID4177125 | ALOX15  | predicted |
| CID4177125 | MAPK1   | predicted |
| CID4177125 | NPC1    | predicted |
| CID4177125 | NPSR1   | predicted |
| CID4177125 | KMT2A   | predicted |
| CID4177125 | KDM4E   | predicted |
| CID4177125 | POLB    | predicted |
| CID4177125 | CYP2C9  | predicted |
| CID10719   | TSHR    | predicted |
| CID10719   | LMNA    | predicted |
| CID10719   | ALDH1A1 | predicted |
| CID10719   | MAPT    | predicted |
| CID10719   | CYP3A4  | predicted |
| CID10719   | TP53    | predicted |
| CID10719   | MAPK1   | predicted |
| CID10719   | CNR2    | predicted |
| CID10719   | ACHE    | predicted |
| CID10719   | CNR1    | predicted |
| CID10719   | PPARG   | predicted |
| CID10719   | TDP1    | predicted |
| CID10719   | PTPN1   | predicted |
| CID10719   | CYP19A1 | predicted |
| CID10719   | TRPA1   | predicted |
| CID10719   | ABCG2   | predicted |
| CID10719   | KMT2A   | predicted |
| CID10719   | ALOX5   | predicted |
| CID10719   | SMN1    | predicted |
| CID10719   | TAAR1   | predicted |
| CID656393  | ESR1    | predicted |
| CID656393  | EED     | predicted |
| CID656393  | ESR2    | predicted |
| CID656393  | PTPRC   | predicted |
| CID656393  | CYP2A6  | predicted |
| CID656393  | PLA2G1B | predicted |
| CID656393  | PTPN1   | predicted |
| CID656393  | MAPK1   | predicted |
| CID656393  | CYP3A4  | predicted |
| CID656393  | ELAVL1  | predicted |
| CID656393  | MYLK    | predicted |
| CID656393  | MAPT    | predicted |
| CID656393  | TSHR    | predicted |
| CID656393  | USP2    | predicted |
| CID656393  | RBBP4   | predicted |
| CID656393  | PTGES   | predicted |
| CID656393  | ALDH1A1 | predicted |
| CID656393  | LMNA    | predicted |
| CID656393  | PTPN6   | predicted |
| CID656393  | ACHE    | predicted |
| CID101731  | PTPN1   | predicted |
| CID101731  | LMNA    | predicted |
| CID101731  | GPBAR1  | predicted |
| CID101731  | TSHR    | predicted |

|            |         |           |
|------------|---------|-----------|
| CID101731  | HSD11B1 | predicted |
| CID101731  | MAPT    | predicted |
| CID101731  | CYP3A4  | predicted |
| CID101731  | TNF     | predicted |
| CID101731  | NR1H3   | predicted |
| CID101731  | RAB9A   | predicted |
| CID101731  | SLCO1B3 | predicted |
| CID101731  | HSD11B2 | predicted |
| CID101731  | XBP1    | predicted |
| CID101731  | SLCO1B1 | predicted |
| CID101731  | CYP19A1 | predicted |
| CID101731  | SHBG    | predicted |
| CID101731  | PTPN2   | predicted |
| CID101731  | NPC1    | predicted |
| CID101731  | SMN1    | predicted |
| CID101731  | NR1H2   | predicted |
| CID5353004 | PTPN1   | predicted |
| CID5353004 | MAPT    | predicted |
| CID5353004 | LMNA    | predicted |
| CID5353004 | CYP3A4  | predicted |
| CID5353004 | TSHR    | predicted |
| CID5353004 | ALDH1A1 | predicted |
| CID5353004 | ALOX5   | predicted |
| CID5353004 | RAB9A   | predicted |
| CID5353004 | KMT2A   | predicted |
| CID5353004 | TP53    | predicted |
| CID5353004 | TDP1    | predicted |
| CID5353004 | CYP19A1 | predicted |
| CID5353004 | SMN1    | predicted |
| CID5353004 | NPC1    | predicted |
| CID5353004 | ABCG2   | predicted |
| CID5353004 | ALOX15  | predicted |
| CID5353004 | ACHE    | predicted |
| CID5353004 | PDE4D   | predicted |
| CID5353004 | MAPK1   | predicted |
| CID5353004 | MPEG1   | predicted |
| CID521214  | PTPN1   | predicted |
| CID521214  | LMNA    | predicted |
| CID521214  | MAPT    | predicted |
| CID521214  | TSHR    | predicted |
| CID521214  | GPBAR1  | predicted |
| CID521214  | CYP3A4  | predicted |
| CID521214  | RAB9A   | predicted |
| CID521214  | HSD11B1 | predicted |
| CID521214  | NPC1    | predicted |
| CID521214  | SMN1    | predicted |
| CID521214  | SHBG    | predicted |
| CID521214  | CYP19A1 | predicted |
| CID521214  | TP53    | predicted |
| CID521214  | KMT2A   | predicted |
| CID521214  | AKR1B10 | predicted |
| CID521214  | ACHE    | predicted |
| CID521214  | MAPK1   | predicted |
| CID521214  | TDP1    | predicted |
| CID521214  | SLCO1B3 | predicted |
| CID521214  | SLCO1B1 | predicted |
| CID5317571 | LMNA    | predicted |
| CID5317571 | TSHR    | predicted |



|            |         |           |
|------------|---------|-----------|
| CID5317571 | MAPT    | predicted |
| CID5317571 | PTPN1   | predicted |
| CID5317571 | ALOX5   | predicted |
| CID5317571 | CYP3A4  | predicted |
| CID5317571 | ALDH1A1 | predicted |
| CID5317571 | MPEG1   | predicted |
| CID5317571 | CYP19A1 | predicted |
| CID5317571 | ABCG2   | predicted |
| CID5317571 | RAB9A   | predicted |
| CID5317571 | SMN1    | predicted |
| CID5317571 | KMT2A   | predicted |
| CID5317571 | ACHE    | predicted |
| CID5317571 | PPARG   | predicted |
| CID5317571 | ALOX15  | predicted |
| CID5317571 | MAPK1   | predicted |
| CID5317571 | TDP1    | predicted |
| CID5317571 | TP53    | predicted |
| CID5317571 | KDM4E   | predicted |
| CID6918391 | PTPN1   | predicted |
| CID6918391 | TSHR    | predicted |
| CID6918391 | LMNA    | predicted |
| CID6918391 | GPBAR1  | predicted |
| CID6918391 | MAPT    | predicted |
| CID6918391 | CYP3A4  | predicted |
| CID6918391 | TP53    | predicted |
| CID6918391 | ALDH1A1 | predicted |
| CID6918391 | HSD11B1 | predicted |
| CID6918391 | TRPA1   | predicted |
| CID6918391 | SLCO1B3 | predicted |
| CID6918391 | RAB9A   | predicted |
| CID6918391 | SHBG    | predicted |
| CID6918391 | SLCO1B1 | predicted |
| CID6918391 | CYP19A1 | predicted |
| CID6918391 | SMN1    | predicted |
| CID6918391 | CNR2    | predicted |
| CID6918391 | NPC1    | predicted |
| CID6918391 | TDP1    | predicted |
| CID6918391 | ALOX5   | predicted |
| CID521334  | PTPN1   | predicted |
| CID521334  | LMNA    | predicted |
| CID521334  | TSHR    | predicted |
| CID521334  | MAPT    | predicted |
| CID521334  | GPBAR1  | predicted |
| CID521334  | CYP3A4  | predicted |
| CID521334  | HSD11B1 | predicted |
| CID521334  | SLCO1B3 | predicted |
| CID521334  | SLCO1B1 | predicted |
| CID521334  | ACHE    | predicted |
| CID521334  | RAB9A   | predicted |
| CID521334  | ALDH1A1 | predicted |
| CID521334  | CYP19A1 | predicted |
| CID521334  | SHBG    | predicted |
| CID521334  | SMN1    | predicted |
| CID521334  | TP53    | predicted |
| CID521334  | TDP1    | predicted |
| CID521334  | ALOX5   | predicted |
| CID521334  | KMT2A   | predicted |
| CID521334  | NPC1    | predicted |

|           |         |           |
|-----------|---------|-----------|
| CID7166   | KDM5C   | predicted |
| CID7166   | KDM2A   | predicted |
| CID7166   | PHF8    | predicted |
| CID7166   | MAPT    | predicted |
| CID7166   | TRPA1   | predicted |
| CID7166   | LMNA    | predicted |
| CID7166   | MAPK1   | predicted |
| CID7166   | CYP19A1 | predicted |
| CID7166   | TSHR    | predicted |
| CID7166   | CYP3A4  | predicted |
| CID7166   | ALOX15  | predicted |
| CID7166   | CYP2C19 | predicted |
| CID7166   | ALOX5   | predicted |
| CID7166   | RAB9A   | predicted |
| CID7166   | CYP2C9  | predicted |
| CID7166   | TAAR1   | predicted |
| CID7166   | ALDH1A1 | predicted |
| CID7166   | ABCG2   | predicted |
| CID7166   | NPC1    | predicted |
| CID7166   | KMT2A   | predicted |
| CID89532  | NR1H3   | predicted |
| CID89532  | PRKCD   | predicted |
| CID89532  | PTPN1   | predicted |
| CID89532  | LMNA    | predicted |
| CID89532  | MAPT    | predicted |
| CID89532  | TSHR    | predicted |
| CID89532  | GPBAR1  | predicted |
| CID89532  | CYP3A4  | predicted |
| CID89532  | HSD11B1 | predicted |
| CID89532  | ACHE    | predicted |
| CID89532  | XBP1    | predicted |
| CID89532  | RAB9A   | predicted |
| CID89532  | PRKCA   | predicted |
| CID89532  | SHBG    | predicted |
| CID89532  | ALDH1A1 | predicted |
| CID89532  | NPC1    | predicted |
| CID89532  | CYP19A1 | predicted |
| CID89532  | ESR1    | predicted |
| CID89532  | SMN1    | predicted |
| CID89532  | TNF     | predicted |
| CID528759 | LMNA    | predicted |
| CID528759 | PTPN1   | predicted |
| CID528759 | NR1H3   | predicted |
| CID528759 | PRKCD   | predicted |
| CID528759 | MAPT    | predicted |
| CID528759 | TSHR    | predicted |
| CID528759 | GPBAR1  | predicted |
| CID528759 | CYP3A4  | predicted |
| CID528759 | RAB9A   | predicted |
| CID528759 | HSD11B1 | predicted |
| CID528759 | SMN1    | predicted |
| CID528759 | NPC1    | predicted |
| CID528759 | SHBG    | predicted |
| CID528759 | ACHE    | predicted |
| CID528759 | XBP1    | predicted |
| CID528759 | PRKCA   | predicted |
| CID528759 | CYP19A1 | predicted |
| CID528759 | ESR1    | predicted |

|            |          |           |
|------------|----------|-----------|
| CID528759  | TDP1     | predicted |
| CID528759  | NPSR1    | predicted |
| CID5316299 | MAPT     | predicted |
| CID5316299 | CYP3A4   | predicted |
| CID5316299 | TDP1     | predicted |
| CID5316299 | LMNA     | predicted |
| CID5316299 | CYP19A1  | predicted |
| CID5316299 | SMN1     | predicted |
| CID5316299 | KDM4E    | predicted |
| CID5316299 | HSD17B10 | predicted |
| CID5316299 | KMT2A    | predicted |
| CID5316299 | RAB9A    | predicted |
| CID5316299 | TSHR     | predicted |
| CID5316299 | PTPN1    | predicted |
| CID5316299 | AKR1B1   | predicted |
| CID5316299 | POLB     | predicted |
| CID5316299 | NPC1     | predicted |
| CID5316299 | TP53     | predicted |
| CID5316299 | GAA      | predicted |
| CID5316299 | ABCG2    | predicted |
| CID5316299 | ALDH1A1  | predicted |
| CID5316299 | CA1      | predicted |
| CID6428461 | PTPN1    | predicted |
| CID6428461 | LMNA     | predicted |
| CID6428461 | TSHR     | predicted |
| CID6428461 | ALOX15   | predicted |
| CID6428461 | CYP3A4   | predicted |
| CID6428461 | MAPT     | predicted |
| CID6428461 | ALDH1A1  | predicted |
| CID6428461 | ACHE     | predicted |
| CID6428461 | KMT2A    | predicted |
| CID6428461 | ALOX5    | predicted |
| CID6428461 | PPARG    | predicted |
| CID6428461 | TDP1     | predicted |
| CID6428461 | BCHE     | predicted |
| CID6428461 | MAPK1    | predicted |
| CID6428461 | CNR2     | predicted |
| CID6428461 | CYP19A1  | predicted |
| CID6428461 | SMN1     | predicted |
| CID6428461 | TP53     | predicted |
| CID6428461 | CNR1     | predicted |
| CID6428461 | RAB9A    | predicted |
| CID2236    | MAPT     | predicted |
| CID2236    | MAPK1    | predicted |
| CID2236    | TP53     | predicted |
| CID2236    | CYP2C19  | predicted |
| CID2236    | HPGD     | predicted |
| CID2236    | LMNA     | predicted |
| CID2236    | HSD17B10 | predicted |
| CID2236    | ALDH1A1  | predicted |
| CID2236    | CYP2C9   | predicted |
| CID2236    | ALOX15   | predicted |
| CID2236    | CYP2D6   | predicted |
| CID2236    | RAB9A    | predicted |
| CID2236    | KDM4E    | predicted |
| CID2236    | NPC1     | predicted |
| CID2236    | USP2     | predicted |
| CID2236    | TSHR     | predicted |

|            |         |           |
|------------|---------|-----------|
| CID2236    | GAA     | predicted |
| CID2236    | THPO    | predicted |
| CID2236    | HTT     | predicted |
| CID2236    | HIF1A   | predicted |
| CID2236    | KMT2A   | Known     |
| CID2236    | SMN1    | Known     |
| CID2236    | CYP3A4  | Known     |
| CID637796  | PADI3   | predicted |
| CID637796  | PADI4   | predicted |
| CID637796  | ITGA4   | predicted |
| CID637796  | GALK1   | predicted |
| CID637796  | S1PR4   | predicted |
| CID637796  | S1PR1   | predicted |
| CID637796  | GPR55   | predicted |
| CID637796  | CTSS    | predicted |
| CID637796  | DUSP1   | predicted |
| CID637796  | KDM4C   | predicted |
| CID637796  | PTPN7   | predicted |
| CID637796  | NPC1    | predicted |
| CID637796  | RAB9A   | predicted |
| CID637796  | MAPK1   | predicted |
| CID637796  | XBP1    | predicted |
| CID637796  | SMN1    | predicted |
| CID637796  | TRPA1   | predicted |
| CID637796  | BLM     | predicted |
| CID637796  | CTNNB1  | predicted |
| CID637796  | KDM4A   | predicted |
| CID637796  | ATM     | Known     |
| CID185617  | CYP3A4  | predicted |
| CID185617  | MAPT    | predicted |
| CID185617  | LMNA    | predicted |
| CID185617  | ABCG2   | predicted |
| CID185617  | RAB9A   | predicted |
| CID185617  | TDP1    | predicted |
| CID185617  | NPC1    | predicted |
| CID185617  | SMN1    | predicted |
| CID185617  | CYP19A1 | predicted |
| CID185617  | BACE1   | predicted |
| CID185617  | POLB    | predicted |
| CID185617  | KMT2A   | predicted |
| CID185617  | KDM4E   | predicted |
| CID185617  | AKR1B1  | predicted |
| CID185617  | PTPN1   | predicted |
| CID185617  | ALDH1A1 | predicted |
| CID185617  | MAPK1   | predicted |
| CID185617  | APEX1   | predicted |
| CID185617  | TSHR    | predicted |
| CID185617  | GAA     | predicted |
| CID5325830 | LMNA    | predicted |
| CID5325830 | PTPN1   | predicted |
| CID5325830 | TSHR    | predicted |
| CID5325830 | MAPT    | predicted |
| CID5325830 | CYP3A4  | predicted |
| CID5325830 | ACHE    | predicted |
| CID5325830 | SMN1    | predicted |
| CID5325830 | RAB9A   | predicted |
| CID5325830 | ALDH1A1 | predicted |
| CID5325830 | NPC1    | predicted |

|            |          |           |
|------------|----------|-----------|
| CID5325830 | KMT2A    | predicted |
| CID5325830 | TDP1     | predicted |
| CID5325830 | TP53     | predicted |
| CID5325830 | CYP19A1  | predicted |
| CID5325830 | ALOX15   | predicted |
| CID5325830 | MAPK1    | predicted |
| CID5325830 | CNR2     | predicted |
| CID5325830 | CNR1     | predicted |
| CID5325830 | GPBAR1   | predicted |
| CID5325830 | ALOX5    | predicted |
| CID72616   | CYP2C9   | predicted |
| CID72616   | CYP3A4   | predicted |
| CID72616   | HIF1A    | predicted |
| CID72616   | MAPT     | predicted |
| CID72616   | LMNA     | predicted |
| CID72616   | TSHR     | predicted |
| CID72616   | NFKB1    | predicted |
| CID72616   | HSD17B10 | predicted |
| CID72616   | TP53     | predicted |
| CID72616   | ALDH1A1  | predicted |
| CID72616   | SMN1     | predicted |
| CID72616   | THPO     | predicted |
| CID72616   | THRB     | predicted |
| CID72616   | ACHE     | predicted |
| CID72616   | CYP2A6   | predicted |
| CID72616   | PARP1    | predicted |
| CID72616   | MAPK1    | predicted |
| CID72616   | CYP2B6   | predicted |
| CID72616   | KDM4E    | predicted |
| CID72616   | CREBBP   | predicted |
| CID72616   | CYP2C19  | Known     |
| CID72616   | CYP2D6   | Known     |
| CID5315645 | PTPN1    | predicted |
| CID5315645 | LMNA     | predicted |
| CID5315645 | MAPT     | predicted |
| CID5315645 | GPBAR1   | predicted |
| CID5315645 | TSHR     | predicted |
| CID5315645 | CYP3A4   | predicted |
| CID5315645 | RAB9A    | predicted |
| CID5315645 | SHBG     | predicted |
| CID5315645 | HSD11B1  | predicted |
| CID5315645 | XBP1     | predicted |
| CID5315645 | KMT2A    | predicted |
| CID5315645 | ALDH1A1  | predicted |
| CID5315645 | SMN1     | predicted |
| CID5315645 | NPC1     | predicted |
| CID5315645 | TDP1     | predicted |
| CID5315645 | CYP19A1  | predicted |
| CID5315645 | ACHE     | predicted |
| CID5315645 | ALOX15   | predicted |
| CID5315645 | TP53     | predicted |
| CID5315645 | TNF      | predicted |
| CID114776  | CYP3A4   | predicted |
| CID114776  | MAPT     | predicted |
| CID114776  | LMNA     | predicted |
| CID114776  | TDP1     | predicted |
| CID114776  | AKR1B1   | predicted |
| CID114776  | CYP19A1  | predicted |

|            |          |           |
|------------|----------|-----------|
| CID114776  | RAB9A    | predicted |
| CID114776  | APEX1    | predicted |
| CID114776  | POLB     | predicted |
| CID114776  | IL2      | predicted |
| CID114776  | NPC1     | predicted |
| CID114776  | SMN1     | predicted |
| CID114776  | ABCG2    | predicted |
| CID114776  | KDM4E    | predicted |
| CID114776  | GAA      | predicted |
| CID114776  | PTPN1    | predicted |
| CID114776  | BACE1    | predicted |
| CID114776  | L3MBTL1  | predicted |
| CID114776  | TSHR     | predicted |
| CID114776  | PSIP1    | predicted |
| CID120734  | CYP3A4   | predicted |
| CID120734  | DRD1     | predicted |
| CID120734  | MAPT     | predicted |
| CID120734  | LMNA     | predicted |
| CID120734  | F3       | predicted |
| CID120734  | CYP2D6   | predicted |
| CID120734  | CYP2C19  | predicted |
| CID120734  | DRD2     | predicted |
| CID120734  | TDP1     | predicted |
| CID120734  | SMN1     | predicted |
| CID120734  | TSHR     | predicted |
| CID120734  | ACHE     | predicted |
| CID120734  | ALDH1A1  | predicted |
| CID120734  | CYP19A1  | predicted |
| CID120734  | KMT2A    | predicted |
| CID120734  | MAOA     | predicted |
| CID120734  | MAPK1    | predicted |
| CID120734  | RAB9A    | predicted |
| CID120734  | HTR1A    | predicted |
| CID120734  | NPC1     | predicted |
| CID439533  | CYP19A1  | predicted |
| CID439533  | CYP3A4   | predicted |
| CID439533  | MAPT     | predicted |
| CID439533  | ABCG2    | predicted |
| CID439533  | BACE1    | predicted |
| CID439533  | MAPK1    | predicted |
| CID439533  | POLB     | predicted |
| CID439533  | LMNA     | predicted |
| CID439533  | TDP1     | predicted |
| CID439533  | KDM4E    | predicted |
| CID439533  | APEX1    | predicted |
| CID439533  | RAB9A    | predicted |
| CID439533  | NPC1     | predicted |
| CID439533  | PTPN1    | predicted |
| CID439533  | MAOA     | predicted |
| CID439533  | ALOX15   | predicted |
| CID439533  | GAA      | predicted |
| CID439533  | KMT2A    | predicted |
| CID439533  | HSD17B10 | predicted |
| CID439533  | ACHE     | predicted |
| CID5316212 | LMNA     | predicted |
| CID5316212 | PTPN1    | predicted |
| CID5316212 | TSHR     | predicted |
| CID5316212 | MAPT     | predicted |

|             |         |           |
|-------------|---------|-----------|
| CID5316212  | CYP3A4  | predicted |
| CID5316212  | RAB9A   | predicted |
| CID5316212  | NPC1    | predicted |
| CID5316212  | GPBAR1  | predicted |
| CID5316212  | SMN1    | predicted |
| CID5316212  | HSD11B1 | predicted |
| CID5316212  | CYP19A1 | predicted |
| CID5316212  | KMT2A   | predicted |
| CID5316212  | ACHE    | predicted |
| CID5316212  | ALDH1A1 | predicted |
| CID5316212  | TDP1    | predicted |
| CID5316212  | TP53    | predicted |
| CID5316212  | ALOX15  | predicted |
| CID5316212  | SHBG    | predicted |
| CID5316212  | CNR2    | predicted |
| CID5316212  | HTT     | predicted |
| CID5255901  | LMNA    | predicted |
| CID471719   | MAPT    | predicted |
| CID5282747  | TSHR    | predicted |
| CID61545    | TPMT    | predicted |
| CID15241817 | TPMT    | predicted |
| CID91520    | LMNA    | predicted |
| CID11186895 | DRD2    | predicted |
| CID485077   | CYP3A4  | predicted |
| CID89047    | CYP3A4  | predicted |
| CID12303797 | CYP3A4  | predicted |
| CID188516   | MAPT    | predicted |
| CID5091219  | PTPN1   | predicted |
| CID5320211  | DRD1    | predicted |
| CID2214     | CYP3A4  | predicted |
| CID289151   | PTPN1   | predicted |
| CID23990    | TSHR    | predicted |
| CID2537     | CYP3A4  | predicted |
| CID6054     | CYP2A6  | predicted |
| CID5280450  | FABP5   | predicted |
| CID10465    | HMGCR   | predicted |
| CID19725    | PTPN1   | predicted |
| CID445638   | OXER1   | predicted |
| CID6989     | MIF     | predicted |
| CID445070   | MAOA    | predicted |
| CID12313332 | CYP3A4  | predicted |
| CID379      | TP53    | predicted |
| CID25240035 | TSHR    | predicted |
| CID5280666  | GSTA1   | predicted |
| CID521215   | PTPN1   | predicted |
| CID522266   | PTPN1   | predicted |
| CID136330   | LMNA    | predicted |
| CID6782     | LMNA    | predicted |
| CID19602    | TSHR    | predicted |
| CID445639   | FABP2   | predicted |
| CID5385553  | CYP3A4  | predicted |
| CID5283316  | TSHR    | predicted |
| CID10703    | ACHE    | predicted |
| CID61041    | PTPN1   | predicted |
| CID519764   | PTPN1   | predicted |
| CID637511   | MIF     | predicted |
| CID10467    | HMGCR   | predicted |
| CID11197    | HMGCR   | predicted |

|              |         |           |
|--------------|---------|-----------|
| CID23443619  | LMNA    | predicted |
| CID5246487   | NOS3    | predicted |
| CID5319551   | PTPN1   | predicted |
| CID5280961   | LMNA    | predicted |
| CID8215      | HMGCR   | predicted |
| CID5281601   | CYP3A4  | predicted |
| CID5317346   | LMNA    | predicted |
| CID5315472   | MAPT    | predicted |
| CID5281767   | ALOX15  | predicted |
| CID14240392  | LMNA    | predicted |
| CID5362828   | LMNA    | predicted |
| CID5280379   | PTPN1   | predicted |
| CID5281984   | PTPN1   | predicted |
| CID68352     | LMNA    | predicted |
| CID108011    | LMNA    | predicted |
| CID441643    | LMNA    | predicted |
| CID25034024  | LMNA    | predicted |
| CID100938406 | LMNA    | predicted |
| CID14367555  | LMNA    | predicted |
| CID14633000  | LMNA    | predicted |
| CID5317598   | HTR3A   | predicted |
| CID154699541 | CYP3A4  | predicted |
| CID11068834  | CYP3A4  | predicted |
| CID5316208   | PTPN1   | predicted |
| CID45359845  | PTPN1   | predicted |
| CID14543212  | LMNA    | predicted |
| CID578234    | LMNA    | predicted |
| CID14191393  | LMNA    | predicted |
| CID387977    | LMNA    | predicted |
| CID3559861   | LMNA    | predicted |
| CID42608153  | TSHR    | predicted |
| CID131751498 | CYP3A4  | predicted |
| CID101953463 | CYP19A1 | predicted |
| CID13347321  | HTR3A   | predicted |
| CID14191392  | LMNA    | predicted |
| CID10039429  | LMNA    | predicted |
| CID13010829  | CYP3A4  | predicted |
| CID10017580  | CYP3A4  | predicted |
| CID13118283  | TSHR    | predicted |
| CID131752799 | MAPT    | predicted |
| CID14543213  | LMNA    | predicted |
| CID14632997  | LMNA    | predicted |
| CID14543199  | LMNA    | predicted |
| CID11795     | CYP1A2  | predicted |
| CID68073     | MAPT    | predicted |
| CID1550936   | CYP3A4  | predicted |
| CID12314812  | ESR1    | predicted |
| CID14543235  | LMNA    | predicted |
| CID9906039   | MAPT    | predicted |
| CID13347322  | TAAR1   | predicted |
| CID131752986 | CYP3A4  | predicted |
| CID57509469  | LMNA    | predicted |
| CID75144776  | LMNA    | predicted |
| CID147446684 | LMNA    | predicted |
| CID536436    | LMNA    | predicted |
| CID10797750  | MAPT    | predicted |
| CID5312418   | TSHR    | predicted |
| CID5282751   | TSHR    | predicted |



|              |        |           |
|--------------|--------|-----------|
| CID78178011  | PTPN1  | predicted |
| CID71363803  | NR1H3  | predicted |
| CID14107524  | CYP1A2 | predicted |
| CID131752987 | MAPT   | predicted |
| CID14632996  | LMNA   | predicted |
| CID13967857  | PTPN1  | predicted |
| CID519762    | PTPN1  | predicted |
| CID14287395  | LMNA   | predicted |
| CID90476927  | PTPN6  | predicted |
| CID637429    | MAPT   | predicted |
| CID57509470  | LMNA   | predicted |
| CID14632994  | PTPN1  | predicted |
| CID78171602  | LMNA   | predicted |
| CID5469424   | MAPT   | predicted |
| CID14543197  | LMNA   | predicted |
| CID15858385  | TRPA1  | predicted |
| CID14633011  | LMNA   | predicted |
| CID10955433  | LMNA   | predicted |
| CID5324473   | MAPT   | predicted |
| CID44629981  | MAPT   | predicted |
| CID49777919  | GPR35  | predicted |
| CID14367556  | LMNA   | predicted |
| CID626934    | DRD1   | predicted |
| CID969516    | ALOX15 | predicted |
| CID6115      | LMNA   | predicted |
| CID5324476   | MAPT   | predicted |
| CID5322095   | TSHR   | predicted |
| CID101682279 | PTPN1  | predicted |
| CID161686    | PTPN1  | predicted |
| CID323273    | LMNA   | predicted |
| CID23274265  | LMNA   | predicted |
| CID5316837   | MAOA   | predicted |
| CID2528      | THRA   | predicted |
| CID5281614   | CDK4   | predicted |
| CID440735    | CYP1A1 | predicted |
| CID12302281  | PTPN1  | predicted |
| CID10051276  | PTPN1  | predicted |
| CID12302289  | PTPN1  | predicted |
| CID12302290  | PTPN1  | predicted |
| CID11197650  | LMNA   | predicted |
| CID5280653   | LMNA   | predicted |
| CID11373178  | LMNA   | predicted |
| CID11373177  | LMNA   | predicted |
| CID6440515   | LMNA   | predicted |
| CID5318717   | MAPT   | predicted |
| CID10004345  | PTPN1  | predicted |
| CID9824100   | CYP3A4 | predicted |
| CID6324916   | LMNA   | predicted |
| CID84298     | LMNA   | predicted |
| CID11962122  | MAPT   | predicted |
| CID10842393  | LMNA   | predicted |
| CID5281232   | TSHR   | predicted |
| CID5281233   | CYP3A4 | predicted |
| CID12315350  | LMNA   | predicted |
| CID6325021   | LMNA   | predicted |
| CID102404034 | LMNA   | predicted |
| CID21769778  | LMNA   | predicted |
| CID5281780   | LMNA   | predicted |

|              |         |           |
|--------------|---------|-----------|
| CID5742692   | CYP3A4  | predicted |
| CID15480861  | PTGES   | predicted |
| CID442667    | ESR1    | predicted |
| CID5742694   | CYP3A4  | predicted |
| CID11372643  | LMNA    | predicted |
| CID11418267  | LMNA    | predicted |
| CID101675239 | LMNA    | predicted |
| CID261859    | MAPT    | predicted |
| CID3008859   | PTPN1   | predicted |
| CID101350248 | LMNA    | predicted |
| CID3082301   | LMNA    | predicted |
| CID14077819  | CYP3A4  | predicted |
| CID219100    | CYP3A4  | predicted |
| CID3008861   | PTPN1   | predicted |
| CID21594154  | PTPN1   | predicted |
| CID5742691   | CYP3A4  | predicted |
| CID5742693   | CYP3A4  | predicted |
| CID10730594  | ESR1    | predicted |
| CID11742062  | PTPN1   | predicted |
| CID10423983  | CELA1   | predicted |
| CID101040104 | MAPT    | predicted |
| CID101040105 | PTPN1   | predicted |
| CID10092871  | PTPN1   | predicted |
| CID10720420  | ESR1    | predicted |
| CID10532385  | CYP3A4  | predicted |
| CID10788255  | CYP3A4  | predicted |
| CID101040112 | CYP3A4  | predicted |
| CID74223810  | CYP3A4  | predicted |
| CID101040113 | CYP3A4  | predicted |
| CID101040110 | MAPT    | predicted |
| CID101040111 | MAPT    | predicted |
| CID101040114 | CYP3A4  | predicted |
| CID101040115 | CYP3A4  | predicted |
| CID219592    | CES1    | predicted |
| CID44257393  | CYP3A4  | predicted |
| CID1738124   | LMNA    | predicted |
| CID101243871 | LMNA    | predicted |
| CID16592     | TRPA1   | predicted |
| CID5281675   | MAPT    | predicted |
| CID5320582   | LMNA    | predicted |
| CID3008860   | ITGA4   | predicted |
| CID442433    | LMNA    | predicted |
| CID11948668  | LMNA    | predicted |
| CID3008858   | PTPN1   | predicted |
| CID14378605  | LMNA    | predicted |
| CID73981590  | LMNA    | predicted |
| CID10787     | MAOB    | predicted |
| CID5317532   | DRD1    | predicted |
| CID87730829  | SLC6A3  | predicted |
| CID14523449  | LMNA    | predicted |
| CID138753594 | CYP3A4  | predicted |
| CID610933    | CYP19A1 | predicted |
| CID70859637  | LMNA    | predicted |
| CID3004155   | PTPN1   | predicted |
| CID53463561  | LMNA    | predicted |
| CID13914606  | PTPN1   | predicted |
| CID76551288  | LMNA    | predicted |
| CID5281152   | CNR2    | predicted |

|              |         |           |
|--------------|---------|-----------|
| CID24814     | DHFR    | predicted |
| CID100058    | LMNA    | predicted |
| CID5316844   | ABCG2   | predicted |
| CID10970376  | CYP3A4  | predicted |
| CID9884033   | CYP19A1 | predicted |
| CID10741     | CYP3A4  | predicted |
| CID10715291  | CYP3A4  | predicted |
| CID44195972  | GPR35   | predicted |
| CID6122937   | MIF     | predicted |
| CID138714873 | LMNA    | predicted |
| CID4490286   | LMNA    | predicted |
| CID387101196 | SLCO2B1 | predicted |
| CID45783213  | LMNA    | predicted |
| CID45783214  | LMNA    | predicted |
| CID1201518   | PTPN1   | predicted |
| CID12445022  | LMNA    | predicted |
| CID8417      | CYP3A4  | predicted |
| CID5280460   | CA1     | predicted |
| CID5316647   | LMNA    | predicted |
| CID5281792   | CYP3A4  | predicted |
| CID196216    | PTPN1   | predicted |
| CID519954    | LMNA    | predicted |
| CID5322049   | CYP3A4  | predicted |
| CID5322048   | MAPT    | predicted |
| CID22559443  | LMNA    | predicted |
| CID5281663   | MAOB    | predicted |
| CID296191    | PTPN1   | predicted |
| CID68252     | TRPA1   | predicted |
| CID5372954   | HCAR2   | predicted |
| CID1549106   | HCAR2   | predicted |
| CID145627453 | PTPN1   | predicted |
| CID7424      | CA13    | predicted |
| CID1309      | CYP3A4  | predicted |
| CID5321869   | MAPT    | predicted |
| CID5321200   | CYP19A1 | predicted |
| CID4483044   | PTPN1   | predicted |
| CID49824629  | MAPT    | predicted |
| CID5321859   | MAPT    | predicted |
| CID3415719   | CYP3A4  | predicted |
| CID5320471   | ABCG2   | predicted |
| CID5321865   | MAOA    | predicted |
| CID71307292  | CYP19A1 | predicted |
| CID21155632  | BACE1   | predicted |
| CID547509    | LMNA    | predicted |
| CID5322076   | MAPT    | predicted |
| CID124211    | MAPT    | predicted |
| CID14135334  | LMNA    | predicted |
| CID5321205   | CYP3A4  | predicted |
| CID4961358   | LMNA    | predicted |
| CID20763017  | PTPN1   | predicted |
| CID296119    | LMNA    | predicted |
| CID445858    | CA4     | predicted |
| CID22376357  | LMNA    | predicted |
| CID119034    | PTPN1   | predicted |
| CID6552009   | PTPN1   | predicted |
| CID5284500   | CYP3A4  | predicted |
| CID12309393  | PTPN1   | predicted |
| CID101761    | PTPN1   | predicted |

|             |          |           |
|-------------|----------|-----------|
| CID6973640  | PTPN1    | predicted |
| CID6321405  | PTPN1    | predicted |
| CID1567554  | DPP4     | predicted |
| CID4220788  | PTPN1    | predicted |
| CID20163303 | PTPN1    | predicted |
| CID455809   | CYP3A4   | predicted |
| CID3082025  | CYP19A1  | predicted |
| CID6365403  | MIF      | predicted |
| CID73648    | CYP3A4   | predicted |
| CID8205     | TSHR     | predicted |
| CID5320193  | TSHR     | predicted |
| CID338      | CA9      | predicted |
| CID11095    | CYP1A1   | predicted |
| CID5320384  | MAPT     | predicted |
| CID22311    | PTPN1    | predicted |
| CID26049    | NR1H3    | predicted |
| CID5282745  | HMGCR    | predicted |
| CID6438157  | TSHR     | predicted |
| CID274352   | CYP2A6   | predicted |
| CID5316834  | CYP3A4   | predicted |
| CID5320475  | MAPT     | predicted |
| CID5316833  | MAPT     | predicted |
| CID124869   | MAPT     | predicted |
| CID9816931  | CYP19A1  | predicted |
| CID49773122 | LMNA     | predicted |
| CID402      | MIF      | predicted |
| CID111446   | NR1H3    | predicted |
| CID15265    | TSHR     | predicted |
| CID5351506  | CYP3A4   | predicted |
| CID5245     | CYP2A6   | predicted |
| CID767      | TSHR     | predicted |
| CID370      | CA13     | predicted |
| CID19009    | BCHE     | predicted |
| CID2353     | AF366264 | predicted |
| CID1115     | LMNA     | predicted |
| CID4068592  | LMNA     | predicted |
| CID14896    | PTPN1    | predicted |
| CID6654     | PTPN1    | predicted |
| CID638011   | ALDH1A1  | predicted |
| CID521380   | LMNA     | predicted |
| CID608886   | PTPN1    | predicted |
| CID520159   | TSHR     | predicted |
| CID10997578 | ACHE     | predicted |
| CID225      | GPBAR1   | predicted |
| CID223578   | PTPN1    | predicted |
| CID10168    | PTK2B    | predicted |
| CID5281607  | CA7      | predicted |
| CID5255901  | MAPT     | predicted |
| CID471719   | CYP3A4   | predicted |
| CID5282747  | LMNA     | predicted |
| CID61545    | IDO1     | predicted |
| CID15241817 | IDO1     | predicted |
| CID91520    | HSP90AA1 | predicted |
| CID11186895 | F3       | predicted |
| CID485077   | MAPT     | predicted |
| CID89047    | MAPT     | predicted |
| CID12303797 | MAPT     | predicted |
| CID188516   | CYP1A2   | predicted |

|              |         |           |
|--------------|---------|-----------|
| CID5091219   | LMNA    | predicted |
| CID5320211   | DRD2    | predicted |
| CID2214      | MAPT    | predicted |
| CID289151    | MAPT    | predicted |
| CID23990     | LMNA    | predicted |
| CID2537      | TP53    | predicted |
| CID6054      | ADRA2A  | predicted |
| CID5280450   | NR1I2   | predicted |
| CID10465     | TSHR    | predicted |
| CID19725     | TSHR    | predicted |
| CID445638    | FABP4   | predicted |
| CID6989      | ALDH1A1 | predicted |
| CID445070    | IDO1    | predicted |
| CID12313332  | MAPT    | predicted |
| CID379       | CYP3A4  | predicted |
| CID25240035  | LMNA    | predicted |
| CID5280666   | XDH     | predicted |
| CID521215    | LMNA    | predicted |
| CID522266    | LMNA    | predicted |
| CID136330    | MAPT    | predicted |
| CID6782      | TSHR    | predicted |
| CID19602     | TP53    | predicted |
| CID445639    | TLR2    | predicted |
| CID5385553   | MAPT    | predicted |
| CID5283316   | ALDH1A1 | predicted |
| CID10703     | TSHR    | predicted |
| CID61041     | MAPT    | predicted |
| CID519764    | LMNA    | predicted |
| CID637511    | HPGD    | predicted |
| CID10467     | TSHR    | predicted |
| CID11197     | TSHR    | predicted |
| CID23443619  | MAPT    | predicted |
| CID5246487   | NOS1    | predicted |
| CID5319551   | LMNA    | predicted |
| CID5280961   | GPER1   | predicted |
| CID8215      | TSHR    | predicted |
| CID5281601   | ABCG2   | predicted |
| CID5317346   | MAPT    | predicted |
| CID5315472   | CYP3A4  | predicted |
| CID5281767   | HPGD    | predicted |
| CID14240392  | MAPT    | predicted |
| CID5362828   | PTPN1   | predicted |
| CID5280379   | LMNA    | predicted |
| CID5281984   | LMNA    | predicted |
| CID68352     | TSHR    | predicted |
| CID108011    | CYP3A4  | predicted |
| CID441643    | CYP3A4  | predicted |
| CID25034024  | CYP3A4  | predicted |
| CID100938406 | CYP3A4  | predicted |
| CID14367555  | PTPN1   | predicted |
| CID14633000  | PTPN1   | predicted |
| CID5317598   | AKR1C3  | predicted |
| CID154699541 | MAPT    | predicted |
| CID11068834  | MAPT    | predicted |
| CID5316208   | LMNA    | predicted |
| CID45359845  | LMNA    | predicted |
| CID14543212  | PTPN1   | predicted |
| CID578234    | PTPN1   | predicted |

|              |         |           |
|--------------|---------|-----------|
| CID14191393  | CYP3A4  | predicted |
| CID387977    | MAPT    | predicted |
| CID3559861   | MAPT    | predicted |
| CID42608153  | ALDH1A1 | predicted |
| CID131751498 | PTPN1   | predicted |
| CID101953463 | CYP3A4  | predicted |
| CID13347321  | AKR1C3  | predicted |
| CID14191392  | TSHR    | predicted |
| CID10039429  | CYP3A4  | predicted |
| CID13010829  | MAPT    | predicted |
| CID10017580  | MAPT    | predicted |
| CID13118283  | LMNA    | predicted |
| CID131752799 | CYP3A4  | predicted |
| CID14543213  | TRPA1   | predicted |
| CID14632997  | PTPN1   | predicted |
| CID14543199  | PTPN1   | predicted |
| CID11795     | HPGD    | predicted |
| CID68073     | CYP2C19 | predicted |
| CID1550936   | MAPT    | predicted |
| CID12314812  | CYP3A4  | predicted |
| CID14543235  | PTPN1   | predicted |
| CID9906039   | CYP3A4  | predicted |
| CID13347322  | TSHR    | predicted |
| CID131752986 | MAPT    | predicted |
| CID57509469  | CYP3A4  | predicted |
| CID75144776  | PTPN1   | predicted |
| CID147446684 | CYP3A4  | predicted |
| CID536436    | PTPN1   | predicted |
| CID10797750  | LMNA    | predicted |
| CID5312418   | HMGCR   | predicted |
| CID5282751   | HMGCR   | predicted |
| CID78178011  | LMNA    | predicted |
| CID71363803  | PRKCD   | predicted |
| CID14107524  | CYP2A6  | predicted |
| CID131752987 | CYP3A4  | predicted |
| CID14632996  | PTPN1   | predicted |
| CID13967857  | LMNA    | predicted |
| CID519762    | TSHR    | predicted |
| CID14287395  | PTPN1   | predicted |
| CID90476927  | PTPN11  | predicted |
| CID637429    | CYP3A4  | predicted |
| CID57509470  | PTPN1   | predicted |
| CID14632994  | LMNA    | predicted |
| CID78171602  | TSHR    | predicted |
| CID5469424   | CYP3A4  | predicted |
| CID14543197  | PTPN1   | predicted |
| CID15858385  | PTGS1   | predicted |
| CID14633011  | PTPN1   | predicted |
| CID10955433  | TRPA1   | predicted |
| CID5324473   | CYP3A4  | predicted |
| CID44629981  | CYP3A4  | predicted |
| CID49777919  | ADRB2   | predicted |
| CID14367556  | PTPN1   | predicted |
| CID626934    | CYP3A4  | predicted |
| CID969516    | HPGD    | predicted |
| CID6115      | TP53    | predicted |
| CID5324476   | CYP3A4  | predicted |
| CID5322095   | LMNA    | predicted |

|              |         |           |
|--------------|---------|-----------|
| CID101682279 | LMNA    | predicted |
| CID161686    | LMNA    | predicted |
| CID323273    | PTPN1   | predicted |
| CID23274265  | PTPN1   | predicted |
| CID5316837   | CYP3A4  | predicted |
| CID2528      | RGS12   | predicted |
| CID5281614   | CDK1    | predicted |
| CID440735    | CYP1A2  | predicted |
| CID12302281  | LMNA    | predicted |
| CID10051276  | LMNA    | predicted |
| CID12302289  | LMNA    | predicted |
| CID12302290  | LMNA    | predicted |
| CID11197650  | AKR1B1  | predicted |
| CID5280653   | AKR1B1  | predicted |
| CID11373178  | CYP3A4  | predicted |
| CID11373177  | CYP3A4  | predicted |
| CID6440515   | CYP3A4  | predicted |
| CID5318717   | CYP3A4  | predicted |
| CID10004345  | LMNA    | predicted |
| CID9824100   | MAPT    | predicted |
| CID6324916   | CYP3A4  | predicted |
| CID84298     | CYP3A4  | predicted |
| CID11962122  | CYP3A4  | predicted |
| CID10842393  | CYP3A4  | predicted |
| CID5281232   | LMNA    | predicted |
| CID5281233   | LMNA    | predicted |
| CID12315350  | PTPN1   | predicted |
| CID6325021   | CYP3A4  | predicted |
| CID102404034 | CYP3A4  | predicted |
| CID21769778  | CYP3A4  | predicted |
| CID5281780   | MAPT    | predicted |
| CID5742692   | MAPT    | predicted |
| CID15480861  | ESR1    | predicted |
| CID442667    | PTPN1   | predicted |
| CID5742694   | MAPT    | predicted |
| CID11372643  | CYP3A4  | predicted |
| CID11418267  | MAPT    | predicted |
| CID101675239 | CYP3A4  | predicted |
| CID261859    | CYP2C19 | predicted |
| CID3008859   | LMNA    | predicted |
| CID101350248 | PTPN1   | predicted |
| CID3082301   | CYP3A4  | predicted |
| CID14077819  | MAPT    | predicted |
| CID219100    | MAPT    | predicted |
| CID3008861   | LMNA    | predicted |
| CID21594154  | LMNA    | predicted |
| CID5742691   | MAPT    | predicted |
| CID5742693   | MAPT    | predicted |
| CID10730594  | CYP3A4  | predicted |
| CID11742062  | CYP3A4  | predicted |
| CID10423983  | ESR1    | predicted |
| CID101040104 | CYP3A4  | predicted |
| CID101040105 | CYP3A4  | predicted |
| CID10092871  | ESR1    | predicted |
| CID10720420  | CELA1   | predicted |
| CID10532385  | PTPN1   | predicted |
| CID10788255  | PTPN1   | predicted |
| CID101040112 | MAPT    | predicted |

|              |         |           |
|--------------|---------|-----------|
| CID74223810  | MAPT    | predicted |
| CID101040113 | MAPT    | predicted |
| CID101040110 | CYP3A4  | predicted |
| CID101040111 | CYP3A4  | predicted |
| CID101040114 | MAPT    | predicted |
| CID101040115 | MAPT    | predicted |
| CID219592    | PTPN6   | predicted |
| CID44257393  | CYP19A1 | predicted |
| CID1738124   | TSHR    | predicted |
| CID101243871 | CYP3A4  | predicted |
| CID16592     | CTSB    | predicted |
| CID5281675   | CYP3A4  | predicted |
| CID5320582   | PTPN1   | predicted |
| CID3008860   | PTPN1   | predicted |
| CID442433    | CYP3A4  | predicted |
| CID11948668  | PTPN1   | predicted |
| CID3008858   | LMNA    | predicted |
| CID14378605  | PTPN1   | predicted |
| CID73981590  | PTPN1   | predicted |
| CID10787     | ALOX15  | predicted |
| CID5317532   | F3      | predicted |
| CID87730829  | MAOB    | predicted |
| CID14523449  | AGL     | predicted |
| CID138753594 | LMNA    | predicted |
| CID610933    | MAPT    | predicted |
| CID70859637  | CHRM3   | predicted |
| CID3004155   | LMNA    | predicted |
| CID53463561  | TSHR    | predicted |
| CID13914606  | LMNA    | predicted |
| CID76551288  | PTPN1   | predicted |
| CID5281152   | HMGCR   | predicted |
| CID24814     | TSHR    | predicted |
| CID100058    | CYP3A4  | predicted |
| CID5316844   | CYP3A4  | predicted |
| CID10970376  | ABCB1   | predicted |
| CID9884033   | CYP3A4  | predicted |
| CID10741     | MAPT    | predicted |
| CID10715291  | MAPT    | predicted |
| CID44195972  | CYP3A4  | predicted |
| CID6122937   | PTGS2   | predicted |
| CID138714873 | CYP3A4  | predicted |
| CID4490286   | CYP3A4  | predicted |
| CID387101196 | TSHR    | predicted |
| CID45783213  | CYP3A4  | predicted |
| CID45783214  | PTPN1   | predicted |
| CID1201518   | LMNA    | predicted |
| CID12445022  | CYP3A4  | predicted |
| CID8417      | MAPT    | predicted |
| CID5280460   | CA14    | predicted |
| CID5316647   | MAPT    | predicted |
| CID5281792   | MAPT    | predicted |
| CID196216    | LMNA    | predicted |
| CID519954    | TSHR    | predicted |
| CID5322049   | MAPT    | predicted |
| CID5322048   | CYP3A4  | predicted |
| CID22559443  | PTPN1   | predicted |
| CID5281663   | CDK5    | predicted |
| CID296191    | LMNA    | predicted |



|              |         |           |
|--------------|---------|-----------|
| CID68252     | LMNA    | predicted |
| CID5372954   | TSHR    | predicted |
| CID1549106   | TSHR    | predicted |
| CID145627453 | LMNA    | predicted |
| CID7424      | CA6     | predicted |
| CID1309      | DRD1    | predicted |
| CID5321869   | CYP3A4  | predicted |
| CID5321200   | MAPT    | predicted |
| CID4483044   | LMNA    | predicted |
| CID49824629  | LMNA    | predicted |
| CID5321859   | CYP3A4  | predicted |
| CID3415719   | DRD1    | predicted |
| CID5320471   | MAPT    | predicted |
| CID5321865   | MAPT    | predicted |
| CID71307292  | MAPT    | predicted |
| CID21155632  | CYP19A1 | predicted |
| CID547509    | CYP2D6  | predicted |
| CID5322076   | CYP3A4  | predicted |
| CID124211    | CYP3A4  | predicted |
| CID14135334  | MAPT    | predicted |
| CID5321205   | MAPT    | predicted |
| CID4961358   | IL2     | predicted |
| CID20763017  | LMNA    | predicted |
| CID296119    | PTPN1   | predicted |
| CID445858    | CA5B    | predicted |
| CID22376357  | CYP3A4  | predicted |
| CID119034    | LMNA    | predicted |
| CID6552009   | LMNA    | predicted |
| CID5284500   | TP53    | predicted |
| CID12309393  | LMNA    | predicted |
| CID101761    | LMNA    | predicted |
| CID6973640   | LMNA    | predicted |
| CID6321405   | LMNA    | predicted |
| CID1567554   | LMNA    | predicted |
| CID4220788   | GPBAR1  | predicted |
| CID20163303  | LMNA    | predicted |
| CID455809    | MAPT    | predicted |
| CID3082025   | MAPT    | predicted |
| CID6365403   | TRPA1   | predicted |
| CID73648     | ABCB1   | predicted |
| CID8205      | LMNA    | predicted |
| CID5320193   | CCR5    | predicted |
| CID338       | CA7     | predicted |
| CID11095     | CYP1A2  | predicted |
| CID5320384   | BCL2    | predicted |
| CID22311     | LMNA    | predicted |
| CID26049     | PTPN1   | predicted |
| CID5282745   | TSHR    | predicted |
| CID6438157   | LMNA    | predicted |
| CID274352    | TSHR    | predicted |
| CID5316834   | ABCG2   | predicted |
| CID5320475   | CYP3A4  | predicted |
| CID5316833   | CYP3A4  | predicted |
| CID124869    | BCL2    | predicted |
| CID9816931   | MAPT    | predicted |
| CID49773122  | HSC70A  | predicted |
| CID402       | TRPA1   | predicted |
| CID111446    | PRKCD   | predicted |

|             |          |           |
|-------------|----------|-----------|
| CID15265    | LMNA     | predicted |
| CID5351506  | MAPT     | predicted |
| CID5245     | LMNA     | predicted |
| CID767      | LMNA     | predicted |
| CID370      | CYP3A4   | predicted |
| CID19009    | CYP2C19  | predicted |
| CID2353     | SENP6    | predicted |
| CID1115     | IL2      | predicted |
| CID4068592  | APEX1    | predicted |
| CID14896    | TSHR     | predicted |
| CID6654     | TSHR     | predicted |
| CID638011   | PTPN1    | predicted |
| CID521380   | PTPN1    | predicted |
| CID608886   | LMNA     | predicted |
| CID520159   | LMNA     | predicted |
| CID10997578 | TRPA1    | predicted |
| CID225      | PTPN1    | predicted |
| CID223578   | LMNA     | predicted |
| CID10168    | CASP3    | predicted |
| CID5281607  | CA14     | predicted |
| CID5255901  | PTPN1    | predicted |
| CID471719   | ABCG2    | predicted |
| CID5282747  | MPEG1    | predicted |
| CID61545    | MIF      | predicted |
| CID15241817 | MIF      | predicted |
| CID91520    | IL2      | predicted |
| CID11186895 | CASP9    | predicted |
| CID485077   | ACHE     | predicted |
| CID89047    | DRD1     | predicted |
| CID12303797 | LMNA     | predicted |
| CID188516   | ABCG2    | predicted |
| CID5091219  | MAPT     | predicted |
| CID5320211  | CYP3A4   | predicted |
| CID2214     | ABCG2    | predicted |
| CID289151   | LMNA     | predicted |
| CID23990    | CYP3A4   | predicted |
| CID2537     | KMT2A    | predicted |
| CID6054     | SLC6A3   | predicted |
| CID5280450  | FABP2    | predicted |
| CID10465    | LMNA     | predicted |
| CID19725    | LMNA     | predicted |
| CID445638   | FABP5    | predicted |
| CID6989     | CYP2E1   | predicted |
| CID445070   | CYP19A1  | predicted |
| CID12313332 | ABCG2    | predicted |
| CID379      | HSD17B10 | predicted |
| CID25240035 | MPEG1    | predicted |
| CID5280666  | ABCB1    | predicted |
| CID521215   | TSHR     | predicted |
| CID522266   | NR1H3    | predicted |
| CID136330   | PTPN1    | predicted |
| CID6782     | MAPT     | predicted |
| CID19602    | ALOX15   | predicted |
| CID445639   | FABP3    | predicted |
| CID5385553  | RAB9A    | predicted |
| CID5283316  | LMNA     | predicted |
| CID10703    | PTPN1    | predicted |
| CID61041    | TSHR     | predicted |

|              |          |           |
|--------------|----------|-----------|
| CID519764    | TSHR     | predicted |
| CID637511    | MAPT     | predicted |
| CID10467     | LMNA     | predicted |
| CID11197     | LMNA     | predicted |
| CID23443619  | HSD17B10 | predicted |
| CID5246487   | CYP2C9   | predicted |
| CID5319551   | GPBAR1   | predicted |
| CID5280961   | SULT1A1  | predicted |
| CID8215      | LMNA     | predicted |
| CID5281601   | MAPT     | predicted |
| CID5317346   | CYP3A4   | predicted |
| CID5315472   | ALOX5    | predicted |
| CID5281767   | TP53     | predicted |
| CID14240392  | TSHR     | predicted |
| CID5362828   | TSHR     | predicted |
| CID5280379   | GPBAR1   | predicted |
| CID5281984   | GPBAR1   | predicted |
| CID68352     | CYP3A4   | predicted |
| CID108011    | TSHR     | predicted |
| CID441643    | MAPT     | predicted |
| CID25034024  | MAPT     | predicted |
| CID100938406 | TSHR     | predicted |
| CID14367555  | TSHR     | predicted |
| CID14633000  | MAPT     | predicted |
| CID5317598   | TAAR1    | predicted |
| CID154699541 | CYP19A1  | predicted |
| CID11068834  | LMNA     | predicted |
| CID5316208   | TSHR     | predicted |
| CID45359845  | GPBAR1   | predicted |
| CID14543212  | TRPA1    | predicted |
| CID578234    | CYP3A4   | predicted |
| CID14191393  | MAPT     | predicted |
| CID387977    | PTPN1    | predicted |
| CID3559861   | TSHR     | predicted |
| CID42608153  | LMNA     | predicted |
| CID131751498 | MAPT     | predicted |
| CID101953463 | MAPT     | predicted |
| CID13347321  | LMNA     | predicted |
| CID14191392  | PTPN1    | predicted |
| CID10039429  | MAPT     | predicted |
| CID13010829  | LMNA     | predicted |
| CID10017580  | LMNA     | predicted |
| CID13118283  | PTPN1    | predicted |
| CID131752799 | CYP19A1  | predicted |
| CID14543213  | PTPN1    | predicted |
| CID14632997  | MAPT     | predicted |
| CID14543199  | MAPT     | predicted |
| CID11795     | MAOA     | predicted |
| CID68073     | HPGD     | predicted |
| CID1550936   | TSHR     | predicted |
| CID12314812  | PTPN1    | predicted |
| CID14543235  | MAPT     | predicted |
| CID9906039   | CYP19A1  | predicted |
| CID13347322  | LMNA     | predicted |
| CID131752986 | ABCG2    | predicted |
| CID57509469  | MAPT     | predicted |
| CID75144776  | TSHR     | predicted |
| CID147446684 | MAPT     | predicted |

|              |        |           |
|--------------|--------|-----------|
| CID536436    | MAPT   | predicted |
| CID10797750  | PPARG  | predicted |
| CID5312418   | LMNA   | predicted |
| CID5282751   | LMNA   | predicted |
| CID78178011  | TSHR   | predicted |
| CID71363803  | PTPN1  | predicted |
| CID14107524  | TSHR   | predicted |
| CID131752987 | ABCG2  | predicted |
| CID14632996  | MAPT   | predicted |
| CID13967857  | TSHR   | predicted |
| CID519762    | LMNA   | predicted |
| CID14287395  | MAPT   | predicted |
| CID90476927  | CYP2A6 | predicted |
| CID637429    | SMN1   | predicted |
| CID57509470  | MAPT   | predicted |
| CID14632994  | PRKCD  | predicted |
| CID78171602  | MAPT   | predicted |
| CID5469424   | ALOX5  | predicted |
| CID14543197  | MAPT   | predicted |
| CID15858385  | TYR    | predicted |
| CID14633011  | MAPT   | predicted |
| CID10955433  | MAPT   | predicted |
| CID5324473   | LMNA   | predicted |
| CID44629981  | TRPA1  | predicted |
| CID49777919  | CTSV   | predicted |
| CID14367556  | TSHR   | predicted |
| CID626934    | MAPT   | predicted |
| CID969516    | TP53   | predicted |
| CID6115      | LTA4H  | predicted |
| CID5324476   | ABCG2  | predicted |
| CID5322095   | CYP3A4 | predicted |
| CID101682279 | GPBAR1 | predicted |
| CID161686    | GPBAR1 | predicted |
| CID323273    | CYP3A4 | predicted |
| CID23274265  | MAPT   | predicted |
| CID5316837   | MAPT   | predicted |
| CID2528      | LMNA   | predicted |
| CID5281614   | KDM4E  | predicted |
| CID440735    | ABCC1  | predicted |
| CID12302281  | GPBAR1 | predicted |
| CID10051276  | GPBAR1 | predicted |
| CID12302289  | GPBAR1 | predicted |
| CID12302290  | GPBAR1 | predicted |
| CID11197650  | CYP3A4 | predicted |
| CID5280653   | CYP3A4 | predicted |
| CID11373178  | MAPT   | predicted |
| CID11373177  | TSHR   | predicted |
| CID6440515   | TSHR   | predicted |
| CID5318717   | ABCG2  | predicted |
| CID10004345  | GPBAR1 | predicted |
| CID9824100   | ABCG2  | predicted |
| CID6324916   | MAPT   | predicted |
| CID84298     | MAPT   | predicted |
| CID11962122  | LMNA   | predicted |
| CID10842393  | MAPT   | predicted |
| CID5281232   | MAPT   | predicted |
| CID5281233   | MAPT   | predicted |
| CID12315350  | CYP3A4 | predicted |

|              |         |           |
|--------------|---------|-----------|
| CID6325021   | PTPN1   | predicted |
| CID102404034 | MAPT    | predicted |
| CID21769778  | MAPT    | predicted |
| CID5281780   | CYP3A4  | predicted |
| CID5742692   | ABCG2   | predicted |
| CID15480861  | PTPN1   | predicted |
| CID442667    | CYP3A4  | predicted |
| CID5742694   | ABCG2   | predicted |
| CID11372643  | MAPT    | predicted |
| CID11418267  | PTPN1   | predicted |
| CID101675239 | PTPN1   | predicted |
| CID261859    | HPGD    | predicted |
| CID3008859   | GPBAR1  | predicted |
| CID101350248 | MAPT    | predicted |
| CID3082301   | MAPT    | predicted |
| CID14077819  | CYP19A1 | predicted |
| CID219100    | CYP19A1 | predicted |
| CID3008861   | GPBAR1  | predicted |
| CID21594154  | GPBAR1  | predicted |
| CID5742691   | ABCG2   | predicted |
| CID5742693   | ABCG2   | predicted |
| CID10730594  | PTPN1   | predicted |
| CID11742062  | ESR1    | predicted |
| CID10423983  | CYP3A4  | predicted |
| CID101040104 | PTPN1   | predicted |
| CID101040105 | ESR1    | predicted |
| CID10092871  | CYP3A4  | predicted |
| CID10720420  | PTPN1   | predicted |
| CID10532385  | ESR1    | predicted |
| CID10788255  | MAPT    | predicted |
| CID101040112 | CYP19A1 | predicted |
| CID74223810  | CYP19A1 | predicted |
| CID101040113 | CYP19A1 | predicted |
| CID101040110 | CYP19A1 | predicted |
| CID101040111 | ABCG2   | predicted |
| CID101040114 | CYP19A1 | predicted |
| CID101040115 | LMNA    | predicted |
| CID219592    | PTPN11  | predicted |
| CID44257393  | MAPT    | predicted |
| CID1738124   | PTPN1   | predicted |
| CID101243871 | MAPT    | predicted |
| CID16592     | HDAC11  | predicted |
| CID5281675   | CYP19A1 | predicted |
| CID5320582   | TSHR    | predicted |
| CID3008860   | LMNA    | predicted |
| CID442433    | PTPN1   | predicted |
| CID11948668  | CYP3A4  | predicted |
| CID3008858   | NR1H3   | predicted |
| CID14378605  | CYP3A4  | predicted |
| CID73981590  | MAPT    | predicted |
| CID10787     | CA12    | predicted |
| CID5317532   | DRD2    | predicted |
| CID87730829  | ITGA2B  | predicted |
| CID14523449  | TSHR    | predicted |
| CID138753594 | MAPT    | predicted |
| CID610933    | CYP3A4  | predicted |
| CID70859637  | TSHR    | predicted |
| CID3004155   | MAPT    | predicted |

|              |         |           |
|--------------|---------|-----------|
| CID53463561  | PTPN1   | predicted |
| CID13914606  | GPBAR1  | predicted |
| CID76551288  | TNF     | predicted |
| CID5281152   | CNR1    | predicted |
| CID24814     | LMNA    | predicted |
| CID100058    | MAPT    | predicted |
| CID5316844   | MAPT    | predicted |
| CID10970376  | MAPT    | predicted |
| CID9884033   | MAPT    | predicted |
| CID10741     | ABCG2   | predicted |
| CID10715291  | ABCG2   | predicted |
| CID44195972  | MAPT    | predicted |
| CID6122937   | HDAC11  | predicted |
| CID138714873 | MAPT    | predicted |
| CID4490286   | MAPT    | predicted |
| CID387101196 | LMNA    | predicted |
| CID45783213  | MAPT    | predicted |
| CID45783214  | CYP3A4  | predicted |
| CID1201518   | GPBAR1  | predicted |
| CID12445022  | PTPN1   | predicted |
| CID8417      | ABCG2   | predicted |
| CID5280460   | CA2     | predicted |
| CID5316647   | CYP3A4  | predicted |
| CID5281792   | TDP1    | predicted |
| CID196216    | TSHR    | predicted |
| CID519954    | PTPN1   | predicted |
| CID5322049   | CYP19A1 | predicted |
| CID5322048   | ABCG2   | predicted |
| CID22559443  | MAPT    | predicted |
| CID5281663   | HTR2C   | predicted |
| CID296191    | GPBAR1  | predicted |
| CID68252     | MAPT    | predicted |
| CID5372954   | CYP3A4  | predicted |
| CID1549106   | CYP3A4  | predicted |
| CID145627453 | GPBAR1  | predicted |
| CID7424      | CA4     | predicted |
| CID1309      | MAPT    | predicted |
| CID5321869   | ABCG2   | predicted |
| CID5321200   | CYP3A4  | predicted |
| CID4483044   | GPBAR1  | predicted |
| CID49824629  | CYP3A4  | predicted |
| CID5321859   | ABCG2   | predicted |
| CID3415719   | MAPT    | predicted |
| CID5320471   | CYP3A4  | predicted |
| CID5321865   | ABCG2   | predicted |
| CID71307292  | CYP3A4  | predicted |
| CID21155632  | CYP3A4  | predicted |
| CID547509    | TSHR    | predicted |
| CID5322076   | MAOA    | predicted |
| CID124211    | ABCG2   | predicted |
| CID14135334  | CYP3A4  | predicted |
| CID5321205   | MAOA    | predicted |
| CID4961358   | CYP3A4  | predicted |
| CID20763017  | TSHR    | predicted |
| CID296119    | TSHR    | predicted |
| CID445858    | CA13    | predicted |
| CID22376357  | MAPT    | predicted |
| CID119034    | GPBAR1  | predicted |

|             |          |           |
|-------------|----------|-----------|
| CID6552009  | GPBAR1   | predicted |
| CID5284500  | KMT2A    | predicted |
| CID12309393 | GPBAR1   | predicted |
| CID101761   | GPBAR1   | predicted |
| CID6973640  | GPBAR1   | predicted |
| CID6321405  | GPBAR1   | predicted |
| CID1567554  | CYP3A4   | predicted |
| CID4220788  | LMNA     | predicted |
| CID20163303 | TSHR     | predicted |
| CID455809   | LMNA     | predicted |
| CID3082025  | PTPN1    | predicted |
| CID6365403  | APOBEC3G | predicted |
| CID73648    | MAPT     | predicted |
| CID8205     | MPEG1    | predicted |
| CID5320193  | ALOX15   | predicted |
| CID338      | CA14     | predicted |
| CID11095    | ABCC1    | predicted |
| CID5320384  | ELANE    | predicted |
| CID22311    | TSHR     | predicted |
| CID26049    | PRKCD    | predicted |
| CID5282745  | LMNA     | predicted |
| CID6438157  | MPEG1    | predicted |
| CID274352   | ALDH1A1  | predicted |
| CID5316834  | MAPT     | predicted |
| CID5320475  | ABCG2    | predicted |
| CID5316833  | ABCG2    | predicted |
| CID124869   | ELANE    | predicted |
| CID9816931  | CYP3A4   | predicted |
| CID49773122 | MAPT     | predicted |
| CID402      | APOBEC3G | predicted |
| CID111446   | PTPN1    | predicted |
| CID15265    | MPEG1    | predicted |
| CID5351506  | LMNA     | predicted |
| CID5245     | CHRFAM7A | predicted |
| CID767      | MAPT     | predicted |
| CID370      | ALOX15   | predicted |
| CID19009    | MAPT     | predicted |
| CID2353     | SENP7    | predicted |
| CID1115     | AKR1B1   | predicted |
| CID4068592  | RECQL    | predicted |
| CID14896    | LMNA     | predicted |
| CID6654     | LMNA     | predicted |
| CID638011   | MAPT     | predicted |
| CID521380   | TSHR     | predicted |
| CID608886   | GPBAR1   | predicted |
| CID520159   | HMGCR    | predicted |
| CID10997578 | CYP19A1  | predicted |
| CID225      | LMNA     | predicted |
| CID223578   | GPBAR1   | predicted |
| CID10168    | HPGD     | predicted |
| CID5281607  | TP53     | predicted |
| CID5255901  | TSHR     | predicted |
| CID471719   | RAB9A    | predicted |
| CID5282747  | HMGCR    | predicted |
| CID61545    | HBB      | predicted |
| CID15241817 | HBB      | predicted |
| CID91520    | CYP3A4   | predicted |
| CID11186895 | DRD5     | predicted |

|              |         |           |
|--------------|---------|-----------|
| CID485077    | HPGD    | predicted |
| CID89047     | F3      | predicted |
| CID12303797  | SMN1    | predicted |
| CID188516    | CYP3A4  | predicted |
| CID5091219   | RAB9A   | predicted |
| CID5320211   | F3      | predicted |
| CID2214      | CYP19A1 | predicted |
| CID289151    | GPBAR1  | predicted |
| CID23990     | PTPN1   | predicted |
| CID2537      | ALDH1A1 | predicted |
| CID6054      | SLC6A2  | predicted |
| CID5280450   | TLR2    | predicted |
| CID10465     | PPARG   | predicted |
| CID19725     | GPBAR1  | predicted |
| CID445638    | TLR2    | predicted |
| CID6989      | CTSL    | predicted |
| CID445070    | PLIN5   | predicted |
| CID12313332  | RAB9A   | predicted |
| CID379       | BLM     | predicted |
| CID25240035  | HMGCR   | predicted |
| CID5280666   | PLIN5   | predicted |
| CID521215    | MAPT    | predicted |
| CID522266    | MAPT    | predicted |
| CID136330    | CYP3A4  | predicted |
| CID6782      | CYP3A4  | predicted |
| CID19602     | LMNA    | predicted |
| CID445639    | OXER1   | predicted |
| CID5385553   | ABCG2   | predicted |
| CID5283316   | MAPT    | predicted |
| CID10703     | TAAR1   | predicted |
| CID61041     | LMNA    | predicted |
| CID519764    | MAPT    | predicted |
| CID637511    | CYP2E1  | predicted |
| CID10467     | PPARG   | predicted |
| CID11197     | PPARG   | predicted |
| CID23443619  | TDP1    | predicted |
| CID5246487   | CYP2D6  | predicted |
| CID5319551   | MAPT    | predicted |
| CID5280961   | SULT1E1 | predicted |
| CID8215      | PPARG   | predicted |
| CID5281601   | RAB9A   | predicted |
| CID5317346   | PTPN1   | predicted |
| CID5315472   | CYP2C9  | predicted |
| CID5281767   | KDM4E   | predicted |
| CID14240392  | PTPN1   | predicted |
| CID5362828   | MAPT    | predicted |
| CID5280379   | MAPT    | predicted |
| CID5281984   | MAPT    | predicted |
| CID68352     | MAPT    | predicted |
| CID108011    | MAPT    | predicted |
| CID441643    | TDP1    | predicted |
| CID25034024  | TDP1    | predicted |
| CID100938406 | MAPT    | predicted |
| CID14367555  | MAPT    | predicted |
| CID14633000  | CYP3A4  | predicted |
| CID5317598   | TSHR    | predicted |
| CID154699541 | LMNA    | predicted |
| CID11068834  | CYP19A1 | predicted |



|              |         |           |
|--------------|---------|-----------|
| CID5316208   | MAPT    | predicted |
| CID45359845  | TSHR    | predicted |
| CID14543212  | TSHR    | predicted |
| CID578234    | TSHR    | predicted |
| CID14191393  | PTPN1   | predicted |
| CID387977    | TSHR    | predicted |
| CID3559861   | PTPN1   | predicted |
| CID42608153  | PTPN1   | predicted |
| CID131751498 | ESR1    | predicted |
| CID101953463 | LMNA    | predicted |
| CID13347321  | TSHR    | predicted |
| CID14191392  | MAPT    | predicted |
| CID10039429  | TSHR    | predicted |
| CID13010829  | CA9     | predicted |
| CID10017580  | CYP19A1 | predicted |
| CID13118283  | CYP3A4  | predicted |
| CID131752799 | LMNA    | predicted |
| CID14543213  | TSHR    | predicted |
| CID14632997  | CYP3A4  | predicted |
| CID14543199  | CYP3A4  | predicted |
| CID11795     | TSHR    | predicted |
| CID68073     | MAPK1   | predicted |
| CID1550936   | HCAR2   | predicted |
| CID12314812  | MAPT    | predicted |
| CID14543235  | CYP3A4  | predicted |
| CID9906039   | LMNA    | predicted |
| CID13347322  | MAPT    | predicted |
| CID131752986 | LMNA    | predicted |
| CID57509469  | PTPN1   | predicted |
| CID75144776  | MAPT    | predicted |
| CID147446684 | PTPN1   | predicted |
| CID536436    | CYP3A4  | predicted |
| CID10797750  | CYP19A1 | predicted |
| CID5312418   | MPEG1   | predicted |
| CID5282751   | MPEG1   | predicted |
| CID78178011  | NR1H3   | predicted |
| CID71363803  | LMNA    | predicted |
| CID14107524  | MAPT    | predicted |
| CID131752987 | RAB9A   | predicted |
| CID14632996  | TSHR    | predicted |
| CID13967857  | MAPT    | predicted |
| CID519762    | MAPT    | predicted |
| CID14287395  | CYP3A4  | predicted |
| CID90476927  | CYP1A2  | predicted |
| CID637429    | LMNA    | predicted |
| CID57509470  | CYP3A4  | predicted |
| CID14632994  | NR1H3   | predicted |
| CID78171602  | CYP3A4  | predicted |
| CID5469424   | LMNA    | predicted |
| CID14543197  | CYP3A4  | predicted |
| CID15858385  | PTPN1   | predicted |
| CID14633011  | CYP3A4  | predicted |
| CID10955433  | PTPN1   | predicted |
| CID5324473   | RAB9A   | predicted |
| CID44629981  | PTGS1   | predicted |
| CID49777919  | CYP2A6  | predicted |
| CID14367556  | MAPT    | predicted |
| CID626934    | F3      | predicted |

|              |         |           |
|--------------|---------|-----------|
| CID969516    | KDM4E   | predicted |
| CID6115      | TBXAS1  | predicted |
| CID5324476   | LMNA    | predicted |
| CID5322095   | FAAH    | predicted |
| CID101682279 | MAPT    | predicted |
| CID161686    | MAPT    | predicted |
| CID323273    | MAPT    | predicted |
| CID23274265  | CYP3A4  | predicted |
| CID5316837   | ABCG2   | predicted |
| CID2528      | LCK     | predicted |
| CID5281614   | TDP1    | predicted |
| CID440735    | BCR     | predicted |
| CID12302281  | TSHR    | predicted |
| CID10051276  | TSHR    | predicted |
| CID12302289  | MAPT    | predicted |
| CID12302290  | MAPT    | predicted |
| CID11197650  | MAPT    | predicted |
| CID5280653   | MAPT    | predicted |
| CID11373178  | TSHR    | predicted |
| CID11373177  | MAPT    | predicted |
| CID6440515   | MAPT    | predicted |
| CID5318717   | LMNA    | predicted |
| CID10004345  | TSHR    | predicted |
| CID9824100   | RAB9A   | predicted |
| CID6324916   | PTPN1   | predicted |
| CID84298     | SMN1    | predicted |
| CID11962122  | PTPN1   | predicted |
| CID10842393  | PTPN1   | predicted |
| CID5281232   | CYP3A4  | predicted |
| CID5281233   | SMN1    | predicted |
| CID12315350  | MAPT    | predicted |
| CID6325021   | MAPT    | predicted |
| CID102404034 | PTPN1   | predicted |
| CID21769778  | PTPN1   | predicted |
| CID5281780   | PTPN1   | predicted |
| CID5742692   | CYP19A1 | predicted |
| CID15480861  | CYP3A4  | predicted |
| CID442667    | PTGES   | predicted |
| CID5742694   | BACE1   | predicted |
| CID11372643  | PTPN1   | predicted |
| CID11418267  | CYP3A4  | predicted |
| CID101675239 | MAPT    | predicted |
| CID261859    | MAPK1   | predicted |
| CID3008859   | NR1H3   | predicted |
| CID101350248 | CYP3A4  | predicted |
| CID3082301   | PTPN1   | predicted |
| CID14077819  | ABCG2   | predicted |
| CID219100    | ABCG2   | predicted |
| CID3008861   | NR1H3   | predicted |
| CID21594154  | TSHR    | predicted |
| CID5742691   | ALDH1A1 | predicted |
| CID5742693   | BACE1   | predicted |
| CID10730594  | MAPT    | predicted |
| CID11742062  | MAPT    | predicted |
| CID10423983  | PTPN1   | predicted |
| CID101040104 | ESR1    | predicted |
| CID101040105 | MAPT    | predicted |
| CID10092871  | MAPT    | predicted |

|              |         |           |
|--------------|---------|-----------|
| CID10720420  | CYP3A4  | predicted |
| CID10532385  | MAPT    | predicted |
| CID10788255  | ESR1    | predicted |
| CID101040112 | ABCG2   | predicted |
| CID74223810  | LMNA    | predicted |
| CID101040113 | ABCG2   | predicted |
| CID101040110 | ABCG2   | predicted |
| CID101040111 | ALDH1A1 | predicted |
| CID101040114 | TYR     | predicted |
| CID101040115 | CYP19A1 | predicted |
| CID219592    | EED     | predicted |
| CID44257393  | PTPN1   | predicted |
| CID1738124   | MAPT    | predicted |
| CID101243871 | PTPN1   | predicted |
| CID16592     | MIF     | predicted |
| CID5281675   | ABCG2   | predicted |
| CID5320582   | MAPT    | predicted |
| CID3008860   | GPBAR1  | predicted |
| CID442433    | MAPT    | predicted |
| CID11948668  | MAPT    | predicted |
| CID3008858   | MAPT    | predicted |
| CID14378605  | MAPT    | predicted |
| CID73981590  | CYP3A4  | predicted |
| CID10787     | CYP3A4  | predicted |
| CID5317532   | TAAR1   | predicted |
| CID87730829  | CYP19A1 | predicted |
| CID14523449  | MGAM    | predicted |
| CID138753594 | SMN1    | predicted |
| CID610933    | ABCG2   | predicted |
| CID70859637  | CYP3A4  | predicted |
| CID3004155   | CYP3A4  | predicted |
| CID53463561  | BCHE    | predicted |
| CID13914606  | NR1H3   | predicted |
| CID76551288  | MAPT    | predicted |
| CID5281152   | TRPV1   | predicted |
| CID24814     | DNMT1   | predicted |
| CID100058    | PTPN1   | predicted |
| CID5316844   | ABCB1   | predicted |
| CID10970376  | ABCG2   | predicted |
| CID9884033   | ABCG2   | predicted |
| CID10741     | BACE1   | predicted |
| CID10715291  | ALDH1A1 | predicted |
| CID44195972  | SMN1    | predicted |
| CID6122937   | TSHR    | predicted |
| CID138714873 | SMN1    | predicted |
| CID4490286   | SMN1    | predicted |
| CID387101196 | MAPT    | predicted |
| CID45783213  | TDP1    | predicted |
| CID45783214  | MAPT    | predicted |
| CID1201518   | MAPT    | predicted |
| CID12445022  | TSHR    | predicted |
| CID8417      | MAOA    | predicted |
| CID5280460   | CA13    | predicted |
| CID5316647   | PTPN1   | predicted |
| CID5281792   | LMNA    | predicted |
| CID196216    | MAPT    | predicted |
| CID519954    | MAPT    | predicted |
| CID5322049   | LMNA    | predicted |

|              |         |           |
|--------------|---------|-----------|
| CID5322048   | CYP19A1 | predicted |
| CID22559443  | CYP3A4  | predicted |
| CID5281663   | HTR2B   | predicted |
| CID296191    | TSHR    | predicted |
| CID68252     | ALDH1A1 | predicted |
| CID5372954   | MAPT    | predicted |
| CID1549106   | MAPT    | predicted |
| CID145627453 | TSHR    | predicted |
| CID7424      | CA5A    | predicted |
| CID1309      | LMNA    | predicted |
| CID5321869   | MAOA    | predicted |
| CID5321200   | ABCG2   | predicted |
| CID4483044   | TNF     | predicted |
| CID49824629  | TDP1    | predicted |
| CID5321859   | ALDH1A1 | predicted |
| CID3415719   | DRD2    | predicted |
| CID5320471   | MAOA    | predicted |
| CID5321865   | CYP3A4  | predicted |
| CID71307292  | ABCG2   | predicted |
| CID21155632  | MAPT    | predicted |
| CID547509    | DRD1    | predicted |
| CID5322076   | ABCG2   | predicted |
| CID124211    | MAOA    | predicted |
| CID14135334  | TDP1    | predicted |
| CID5321205   | ABCG2   | predicted |
| CID4961358   | MAPT    | predicted |
| CID20763017  | GPBAR1  | predicted |
| CID296119    | MAPT    | predicted |
| CID445858    | CA3     | predicted |
| CID22376357  | POLB    | predicted |
| CID119034    | TSHR    | predicted |
| CID6552009   | MAPT    | predicted |
| CID5284500   | ALDH1A1 | predicted |
| CID12309393  | MAPT    | predicted |
| CID101761    | TSHR    | predicted |
| CID6973640   | MAPT    | predicted |
| CID6321405   | MAPT    | predicted |
| CID1567554   | MAPT    | predicted |
| CID4220788   | MAPT    | predicted |
| CID20163303  | MAPT    | predicted |
| CID455809    | CYP19A1 | predicted |
| CID3082025   | CYP3A4  | predicted |
| CID6365403   | TPMT    | predicted |
| CID73648     | ABCG2   | predicted |
| CID8205      | CYP3A4  | predicted |
| CID5320193   | KDM4E   | predicted |
| CID338       | CA13    | predicted |
| CID11095     | BCR     | predicted |
| CID5320384   | MAOA    | predicted |
| CID22311     | MAPT    | predicted |
| CID26049     | LMNA    | predicted |
| CID5282745   | PPARG   | predicted |
| CID6438157   | HMGCR   | predicted |
| CID274352    | TDP1    | predicted |
| CID5316834   | LMNA    | predicted |
| CID5320475   | CYP19A1 | predicted |
| CID5316833   | MAOA    | predicted |
| CID124869    | MAOA    | predicted |

|             |          |           |
|-------------|----------|-----------|
| CID9816931  | ABCG2    | predicted |
| CID49773122 | P2RY1    | predicted |
| CID402      | TPMT     | predicted |
| CID111446   | LMNA     | predicted |
| CID15265    | HMGCR    | predicted |
| CID5351506  | TDP1     | predicted |
| CID5245     | CHRNA2   | predicted |
| CID767      | MAOA     | predicted |
| CID370      | RECQL    | predicted |
| CID19009    | CYP2D6   | predicted |
| CID2353     | CASP3    | predicted |
| CID1115     | HSP90AA1 | predicted |
| CID4068592  | PMP22    | predicted |
| CID14896    | CYP3A4   | predicted |
| CID6654     | CYP3A4   | predicted |
| CID638011   | TSHR     | predicted |
| CID521380   | MAPT     | predicted |
| CID608886   | TSHR     | predicted |
| CID520159   | MAPT     | predicted |
| CID10997578 | LMNA     | predicted |
| CID225      | SHBG     | predicted |
| CID223578   | MAPT     | predicted |
| CID10168    | ALDH1A1  | predicted |
| CID5281607  | CA13     | predicted |
| CID5255901  | CYP3A4   | predicted |
| CID471719   | MAOA     | predicted |
| CID5282747  | FAAH     | predicted |
| CID61545    | HPRT1    | predicted |
| CID15241817 | HPRT1    | predicted |
| CID91520    | MAPT     | predicted |
| CID11186895 | DRD3     | predicted |
| CID485077   | CYP2D6   | predicted |
| CID89047    | LMNA     | predicted |
| CID12303797 | CYP19A1  | predicted |
| CID188516   | CYP2A6   | predicted |
| CID5091219  | CYP3A4   | predicted |
| CID5320211  | MAPT     | predicted |
| CID2214     | RAB9A    | predicted |
| CID289151   | TSHR     | predicted |
| CID23990    | ALDH1A1  | predicted |
| CID2537     | ALOX15   | predicted |
| CID6054     | SLC6A4   | predicted |
| CID5280450  | OXER1    | predicted |
| CID10465    | PPARD    | predicted |
| CID19725    | MAPT     | predicted |
| CID445638   | FFAR1    | predicted |
| CID6989     | CTSB     | predicted |
| CID445070   | PLIN1    | predicted |
| CID12313332 | LMNA     | predicted |
| CID379      | HTT      | predicted |
| CID25240035 | FAAH     | predicted |
| CID5280666  | RECQL    | predicted |
| CID521215   | CYP3A4   | predicted |
| CID522266   | PRKCD    | predicted |
| CID136330   | TSHR     | predicted |
| CID6782     | IDO1     | predicted |
| CID19602    | HPGD     | predicted |
| CID445639   | FFAR1    | predicted |

|              |          |           |
|--------------|----------|-----------|
| CID5385553   | NPC1     | predicted |
| CID5283316   | CYP3A4   | predicted |
| CID10703     | LMNA     | predicted |
| CID61041     | ALDH1A1  | predicted |
| CID519764    | CYP3A4   | predicted |
| CID637511    | HSD17B10 | predicted |
| CID10467     | PPARD    | predicted |
| CID11197     | PPARD    | predicted |
| CID23443619  | HPGD     | predicted |
| CID5246487   | THPO     | predicted |
| CID5319551   | TSHR     | predicted |
| CID5280961   | BCR      | predicted |
| CID8215      | PPARD    | predicted |
| CID5281601   | NPC1     | predicted |
| CID5317346   | SMN1     | predicted |
| CID5315472   | LMNA     | predicted |
| CID5281767   | USP2     | predicted |
| CID14240392  | CYP3A4   | predicted |
| CID5362828   | CYP3A4   | predicted |
| CID5280379   | CYP3A4   | predicted |
| CID5281984   | TSHR     | predicted |
| CID68352     | SMN1     | predicted |
| CID108011    | SMN1     | predicted |
| CID441643    | AKR1B1   | predicted |
| CID25034024  | SMN1     | predicted |
| CID100938406 | SMN1     | predicted |
| CID14367555  | CYP19A1  | predicted |
| CID14633000  | TSHR     | predicted |
| CID5317598   | LMNA     | predicted |
| CID154699541 | ABCG2    | predicted |
| CID11068834  | TDP1     | predicted |
| CID5316208   | CYP3A4   | predicted |
| CID45359845  | MAPT     | predicted |
| CID14543212  | MAPT     | predicted |
| CID578234    | MAPT     | predicted |
| CID14191393  | TSHR     | predicted |
| CID387977    | CYP3A4   | predicted |
| CID3559861   | CYP3A4   | predicted |
| CID42608153  | MAPT     | predicted |
| CID131751498 | LMNA     | predicted |
| CID101953463 | ABCG2    | predicted |
| CID13347321  | TAAR1    | predicted |
| CID14191392  | CYP3A4   | predicted |
| CID10039429  | CYP19A1  | predicted |
| CID13010829  | TSHR     | predicted |
| CID10017580  | TSHR     | predicted |
| CID13118283  | MAPT     | predicted |
| CID131752799 | CYP2C9   | predicted |
| CID14543213  | MAPT     | predicted |
| CID14632997  | TSHR     | predicted |
| CID14543199  | TSHR     | predicted |
| CID11795     | ADRA2A   | predicted |
| CID68073     | CYP2C9   | predicted |
| CID1550936   | TDP1     | predicted |
| CID12314812  | ESR2     | predicted |
| CID14543235  | TSHR     | predicted |
| CID9906039   | ALOX5    | predicted |
| CID13347322  | CYP3A4   | predicted |

|              |          |           |
|--------------|----------|-----------|
| CID131752986 | ALDH1A1  | predicted |
| CID57509469  | TSHR     | predicted |
| CID75144776  | CYP3A4   | predicted |
| CID147446684 | TSHR     | predicted |
| CID536436    | TSHR     | predicted |
| CID10797750  | TDP1     | predicted |
| CID5312418   | FAAH     | predicted |
| CID5282751   | FAAH     | predicted |
| CID78178011  | PRKCD    | predicted |
| CID71363803  | TRPA1    | predicted |
| CID14107524  | HPGD     | predicted |
| CID131752987 | ALDH1A1  | predicted |
| CID14632996  | CYP3A4   | predicted |
| CID13967857  | ALOX5    | predicted |
| CID519762    | TNF      | predicted |
| CID14287395  | TSHR     | predicted |
| CID90476927  | CES2     | predicted |
| CID637429    | TDP1     | predicted |
| CID57509470  | TSHR     | predicted |
| CID14632994  | TRPA1    | predicted |
| CID78171602  | PTPN1    | predicted |
| CID5469424   | ABCG2    | predicted |
| CID14543197  | TSHR     | predicted |
| CID15858385  | MAPT     | predicted |
| CID14633011  | TSHR     | predicted |
| CID10955433  | CYP19A1  | predicted |
| CID5324473   | ALDH1A1  | predicted |
| CID44629981  | ALOX5    | predicted |
| CID49777919  | TSHR     | predicted |
| CID14367556  | CYP19A1  | predicted |
| CID626934    | DRD2     | predicted |
| CID969516    | USP2     | predicted |
| CID6115      | NFKB1    | predicted |
| CID5324476   | RAB9A    | predicted |
| CID5322095   | MAPT     | predicted |
| CID101682279 | TSHR     | predicted |
| CID161686    | CYP3A4   | predicted |
| CID323273    | TSHR     | predicted |
| CID23274265  | TSHR     | predicted |
| CID5316837   | BACE1    | predicted |
| CID2528      | HTR2B    | predicted |
| CID5281614   | CYP3A4   | predicted |
| CID440735    | ABCB1    | predicted |
| CID12302281  | MAPT     | predicted |
| CID10051276  | MAPT     | predicted |
| CID12302289  | TSHR     | predicted |
| CID12302290  | TSHR     | predicted |
| CID11197650  | HSP90AA1 | predicted |
| CID5280653   | HSP90AA1 | predicted |
| CID11373178  | SMN1     | predicted |
| CID11373177  | AKR1B1   | predicted |
| CID6440515   | AKR1B1   | predicted |
| CID5318717   | CYP19A1  | predicted |
| CID10004345  | MAPT     | predicted |
| CID9824100   | NPC1     | predicted |
| CID6324916   | TSHR     | predicted |
| CID84298     | TSHR     | predicted |
| CID11962122  | TDP1     | predicted |

|              |         |           |
|--------------|---------|-----------|
| CID10842393  | RAB9A   | predicted |
| CID5281232   | ALDH1A1 | predicted |
| CID5281233   | TDP1    | predicted |
| CID12315350  | TSHR    | predicted |
| CID6325021   | TSHR    | predicted |
| CID102404034 | TSHR    | predicted |
| CID21769778  | TSHR    | predicted |
| CID5281780   | AKR1B10 | predicted |
| CID5742692   | BACE1   | predicted |
| CID15480861  | PTGS1   | predicted |
| CID442667    | EED     | predicted |
| CID5742694   | CYP19A1 | predicted |
| CID11372643  | TSHR    | predicted |
| CID11418267  | TSHR    | predicted |
| CID101675239 | TSHR    | predicted |
| CID261859    | CYP2C9  | predicted |
| CID3008859   | MAPT    | predicted |
| CID101350248 | TSHR    | predicted |
| CID3082301   | TSHR    | predicted |
| CID14077819  | LMNA    | predicted |
| CID219100    | RAB9A   | predicted |
| CID3008861   | TSHR    | predicted |
| CID21594154  | MAPT    | predicted |
| CID5742691   | BACE1   | predicted |
| CID5742693   | CYP19A1 | predicted |
| CID10730594  | PTGES   | predicted |
| CID11742062  | ALDH1A1 | predicted |
| CID10423983  | MAPT    | predicted |
| CID101040104 | ALDH1A1 | predicted |
| CID101040105 | ALDH1A1 | predicted |
| CID10092871  | PTGES   | predicted |
| CID10720420  | PTGES   | predicted |
| CID10532385  | PTGES   | predicted |
| CID10788255  | ALDH1A1 | predicted |
| CID101040112 | LMNA    | predicted |
| CID74223810  | PTPN1   | predicted |
| CID101040113 | BACE1   | predicted |
| CID101040110 | ALDH1A1 | predicted |
| CID101040111 | PTPN1   | predicted |
| CID101040114 | ESR1    | predicted |
| CID101040115 | ABCG2   | predicted |
| CID219592    | APAF1   | predicted |
| CID44257393  | ABCG2   | predicted |
| CID1738124   | HMGCR   | predicted |
| CID101243871 | TSHR    | predicted |
| CID16592     | TSHR    | predicted |
| CID5281675   | TDP1    | predicted |
| CID5320582   | CYP3A4  | predicted |
| CID3008860   | S1PR4   | predicted |
| CID442433    | TSHR    | predicted |
| CID11948668  | TSHR    | predicted |
| CID3008858   | GPBAR1  | predicted |
| CID14378605  | TSHR    | predicted |
| CID73981590  | TSHR    | predicted |
| CID10787     | CYP19A1 | predicted |
| CID5317532   | ESR2    | predicted |
| CID87730829  | MAOA    | predicted |
| CID14523449  | CYP3A4  | predicted |



|              |         |           |
|--------------|---------|-----------|
| CID138753594 | TDP1    | predicted |
| CID610933    | MAOA    | predicted |
| CID70859637  | CHRM2   | predicted |
| CID3004155   | RAB9A   | predicted |
| CID53463561  | ACHE    | predicted |
| CID13914606  | MAPT    | predicted |
| CID76551288  | CYP3A4  | predicted |
| CID5281152   | TSHR    | predicted |
| CID24814     | ADORA1  | predicted |
| CID100058    | TSHR    | predicted |
| CID5316844   | RAB9A   | predicted |
| CID10970376  | ADORA3  | predicted |
| CID9884033   | BACE1   | predicted |
| CID10741     | ALDH1A1 | predicted |
| CID10715291  | ABCB1   | predicted |
| CID44195972  | ADRB2   | predicted |
| CID6122937   | LMNA    | predicted |
| CID138714873 | TDP1    | predicted |
| CID4490286   | PTPN1   | predicted |
| CID387101196 | PARP1   | predicted |
| CID45783213  | PTPN1   | predicted |
| CID45783214  | TSHR    | predicted |
| CID1201518   | TSHR    | predicted |
| CID12445022  | MAPT    | predicted |
| CID8417      | ALDH1A1 | predicted |
| CID5280460   | MAPT    | predicted |
| CID5316647   | TDP1    | predicted |
| CID5281792   | CYP19A1 | predicted |
| CID196216    | CYP3A4  | predicted |
| CID519954    | CYP3A4  | predicted |
| CID5322049   | TSHR    | predicted |
| CID5322048   | BACE1   | predicted |
| CID22559443  | TSHR    | predicted |
| CID5281663   | HTR3A   | predicted |
| CID296191    | HSD11B1 | predicted |
| CID68252     | CYP3A4  | predicted |
| CID5372954   | LMNA    | predicted |
| CID1549106   | TDP1    | predicted |
| CID145627453 | MAPT    | predicted |
| CID7424      | CA5B    | predicted |
| CID1309      | F3      | predicted |
| CID5321869   | CYP19A1 | predicted |
| CID5321200   | MAOA    | predicted |
| CID4483044   | MAPT    | predicted |
| CID49824629  | RAB9A   | predicted |
| CID5321859   | TDP1    | predicted |
| CID3415719   | F3      | predicted |
| CID5320471   | CYP19A1 | predicted |
| CID5321865   | CYP19A1 | predicted |
| CID71307292  | BACE1   | predicted |
| CID21155632  | ABCG2   | predicted |
| CID547509    | ACHE    | predicted |
| CID5322076   | TP53    | predicted |
| CID124211    | ABCB1   | predicted |
| CID14135334  | TSHR    | predicted |
| CID5321205   | TP53    | predicted |
| CID4961358   | AKR1B1  | predicted |
| CID20763017  | MAPT    | predicted |

|             |          |           |
|-------------|----------|-----------|
| CID296119   | IL2      | predicted |
| CID445858   | HSD17B10 | predicted |
| CID22376357 | CYP19A1  | predicted |
| CID119034   | HSD11B1  | predicted |
| CID6552009  | TSHR     | predicted |
| CID5284500  | ALOX15   | predicted |
| CID12309393 | TSHR     | predicted |
| CID101761   | MAPT     | predicted |
| CID6973640  | TSHR     | predicted |
| CID6321405  | TSHR     | predicted |
| CID1567554  | ABCG2    | predicted |
| CID4220788  | CYP3A4   | predicted |
| CID20163303 | CYP3A4   | predicted |
| CID455809   | SMN1     | predicted |
| CID3082025  | LMNA     | predicted |
| CID6365403  | CTSB     | predicted |
| CID73648    | ADORA3   | predicted |
| CID8205     | MAPT     | predicted |
| CID5320193  | TDP1     | predicted |
| CID338      | CA6      | predicted |
| CID11095    | ABCB1    | predicted |
| CID5320384  | CYP3A4   | predicted |
| CID22311    | CYP3A4   | predicted |
| CID26049    | TSHR     | predicted |
| CID5282745  | PPARA    | predicted |
| CID6438157  | FAAH     | predicted |
| CID274352   | CA3      | predicted |
| CID5316834  | ACHE     | predicted |
| CID5320475  | KDM4E    | predicted |
| CID5316833  | CYP19A1  | predicted |
| CID124869   | KMT2A    | predicted |
| CID9816931  | BACE1    | predicted |
| CID49773122 | SMN1     | predicted |
| CID402      | CTSB     | predicted |
| CID111446   | MAPT     | predicted |
| CID15265    | FAAH     | predicted |
| CID5351506  | RAB9A    | predicted |
| CID5245     | ALDH1A1  | predicted |
| CID767      | CYP3A4   | predicted |
| CID370      | TSHR     | predicted |
| CID19009    | TSHR     | predicted |
| CID2353     | CYP2C19  | predicted |
| CID1115     | SMN1     | predicted |
| CID4068592  | MAPT     | predicted |
| CID14896    | MAPT     | predicted |
| CID6654     | MAPT     | predicted |
| CID638011   | CYP3A4   | predicted |
| CID521380   | CYP3A4   | predicted |
| CID608886   | MAPT     | predicted |
| CID520159   | PTPN1    | predicted |
| CID10997578 | PTPN1    | predicted |
| CID225      | MAPT     | predicted |
| CID223578   | TSHR     | predicted |
| CID10168    | HSD17B10 | predicted |
| CID5281607  | CCND1    | predicted |
| CID5255901  | RAB9A    | predicted |
| CID471719   | ABCB1    | predicted |
| CID5282747  | MAPT     | predicted |

|              |         |           |
|--------------|---------|-----------|
| CID61545     | TRPA1   | predicted |
| CID15241817  | TRPA1   | predicted |
| CID91520     | RAB9A   | predicted |
| CID11186895  | DRD4    | predicted |
| CID485077    | DRD1    | predicted |
| CID89047     | DRD2    | predicted |
| CID12303797  | PTPN1   | predicted |
| CID188516    | MAOA    | predicted |
| CID5091219   | GPBAR1  | predicted |
| CID5320211   | LMNA    | predicted |
| CID2214      | LMNA    | predicted |
| CID289151    | HSD11B1 | predicted |
| CID23990     | MAPT    | predicted |
| CID2537      | KDM4E   | predicted |
| CID6054      | TSHR    | predicted |
| CID5280450   | ALDH1A1 | predicted |
| CID10465     | PPARA   | predicted |
| CID19725     | CYP3A4  | predicted |
| CID445638    | FFAR4   | predicted |
| CID6989      | TSHR    | predicted |
| CID445070    | CDC25B  | predicted |
| CID12313332  | CYP19A1 | predicted |
| CID379       | NFKB1   | predicted |
| CID25240035  | ALOX5   | predicted |
| CID5280666   | BCR     | predicted |
| CID521215    | GPBAR1  | predicted |
| CID522266    | GPBAR1  | predicted |
| CID136330    | ALDH1A1 | predicted |
| CID6782      | TDP1    | predicted |
| CID19602     | TRPV1   | predicted |
| CID445639    | FFAR4   | predicted |
| CID5385553   | LMNA    | predicted |
| CID5283316   | CNR2    | predicted |
| CID10703     | HPGD    | predicted |
| CID61041     | CYP3A4  | predicted |
| CID519764    | ALOX15  | predicted |
| CID637511    | TSHR    | predicted |
| CID10467     | PPARA   | predicted |
| CID11197     | PPARA   | predicted |
| CID23443619  | RECQL   | predicted |
| CID5246487   | CYP3A4  | predicted |
| CID5319551   | RAB9A   | predicted |
| CID5280961   | CYP1A2  | predicted |
| CID8215      | PPARA   | predicted |
| CID5281601   | CYP19A1 | predicted |
| CID5317346   | TSHR    | predicted |
| CID5315472   | TSHR    | predicted |
| CID5281767   | CYP3A4  | predicted |
| CID14240392  | RAB9A   | predicted |
| CID5362828   | CYP19A1 | predicted |
| CID5280379   | RAB9A   | predicted |
| CID5281984   | CYP3A4  | predicted |
| CID68352     | ALDH1A1 | predicted |
| CID108011    | AKR1B1  | predicted |
| CID441643    | TSHR    | predicted |
| CID25034024  | TSHR    | predicted |
| CID100938406 | TDP1    | predicted |
| CID14367555  | CYP3A4  | predicted |

|              |         |           |
|--------------|---------|-----------|
| CID14633000  | GPBAR1  | predicted |
| CID5317598   | MAPT    | predicted |
| CID154699541 | TSHR    | predicted |
| CID11068834  | TSHR    | predicted |
| CID5316208   | GPBAR1  | predicted |
| CID45359845  | CYP3A4  | predicted |
| CID14543212  | CYP3A4  | predicted |
| CID578234    | SMN1    | predicted |
| CID14191393  | SMN1    | predicted |
| CID387977    | RAB9A   | predicted |
| CID3559861   | RAB9A   | predicted |
| CID42608153  | CYP3A4  | predicted |
| CID131751498 | CYP19A1 | predicted |
| CID101953463 | TDP1    | predicted |
| CID13347321  | CYP19A1 | predicted |
| CID14191392  | ALOX5   | predicted |
| CID10039429  | RAB9A   | predicted |
| CID13010829  | CA1     | predicted |
| CID10017580  | TDP1    | predicted |
| CID13118283  | MAPK1   | predicted |
| CID131752799 | TDP1    | predicted |
| CID14543213  | CYP3A4  | predicted |
| CID14632997  | GPBAR1  | predicted |
| CID14543199  | CYP19A1 | predicted |
| CID11795     | CYP2A6  | predicted |
| CID68073     | CYP2D6  | predicted |
| CID1550936   | RAB9A   | predicted |
| CID12314812  | EED     | predicted |
| CID14543235  | RAB9A   | predicted |
| CID9906039   | TSHR    | predicted |
| CID13347322  | CYP19A1 | predicted |
| CID131752986 | RAB9A   | predicted |
| CID57509469  | SMN1    | predicted |
| CID75144776  | ESR1    | predicted |
| CID147446684 | SMN1    | predicted |
| CID536436    | ALOX5   | predicted |
| CID10797750  | TSHR    | predicted |
| CID5312418   | ALOX5   | predicted |
| CID5282751   | ALOX5   | predicted |
| CID78178011  | MAPT    | predicted |
| CID71363803  | NPSR1   | predicted |
| CID14107524  | LMNA    | predicted |
| CID131752987 | LMNA    | predicted |
| CID14632996  | CYP19A1 | predicted |
| CID13967857  | CYP3A4  | predicted |
| CID519762    | GPBAR1  | predicted |
| CID14287395  | CYP19A1 | predicted |
| CID90476927  | MAPT    | predicted |
| CID637429    | TSHR    | predicted |
| CID57509470  | RAB9A   | predicted |
| CID14632994  | TNF     | predicted |
| CID78171602  | ALDH1A1 | predicted |
| CID5469424   | ALDH1A1 | predicted |
| CID14543197  | GPBAR1  | predicted |
| CID15858385  | CYP19A1 | predicted |
| CID14633011  | SMN1    | predicted |
| CID10955433  | CYP3A4  | predicted |
| CID5324473   | ABCG2   | predicted |

|              |         |           |
|--------------|---------|-----------|
| CID44629981  | LMNA    | predicted |
| CID49777919  | CA3     | predicted |
| CID14367556  | CYP3A4  | predicted |
| CID626934    | CYP2D6  | predicted |
| CID969516    | CYP3A4  | predicted |
| CID6115      | DAO     | predicted |
| CID5324476   | ALDH1A1 | predicted |
| CID5322095   | HMGCR   | predicted |
| CID101682279 | CYP3A4  | predicted |
| CID161686    | TSHR    | predicted |
| CID323273    | TDP1    | predicted |
| CID23274265  | SMN1    | predicted |
| CID5316837   | CYP19A1 | predicted |
| CID2528      | THRB    | predicted |
| CID5281614   | CCND1   | predicted |
| CID440735    | XDH     | predicted |
| CID12302281  | HSD11B1 | predicted |
| CID10051276  | CYP3A4  | predicted |
| CID12302289  | HSD11B1 | predicted |
| CID12302290  | HSD11B1 | predicted |
| CID11197650  | TSHR    | predicted |
| CID5280653   | TSHR    | predicted |
| CID11373178  | AKR1B1  | predicted |
| CID11373177  | SMN1    | predicted |
| CID6440515   | SMN1    | predicted |
| CID5318717   | RAB9A   | predicted |
| CID10004345  | HSD11B1 | predicted |
| CID9824100   | LMNA    | predicted |
| CID6324916   | SMN1    | predicted |
| CID84298     | PTPN1   | predicted |
| CID11962122  | SMN1    | predicted |
| CID10842393  | SMN1    | predicted |
| CID5281232   | TDP1    | predicted |
| CID5281233   | RAB9A   | predicted |
| CID12315350  | SMN1    | predicted |
| CID6325021   | TDP1    | predicted |
| CID102404034 | SMN1    | predicted |
| CID21769778  | SMN1    | predicted |
| CID5281780   | SMN1    | predicted |
| CID5742692   | ABCB1   | predicted |
| CID15480861  | TYR     | predicted |
| CID442667    | MAPT    | predicted |
| CID5742694   | ABCB1   | predicted |
| CID11372643  | TDP1    | predicted |
| CID11418267  | RAB9A   | predicted |
| CID101675239 | SMN1    | predicted |
| CID261859    | CYP2D6  | predicted |
| CID3008859   | HSD11B1 | predicted |
| CID101350248 | RAB9A   | predicted |
| CID3082301   | TDP1    | predicted |
| CID14077819  | TYR     | predicted |
| CID219100    | LMNA    | predicted |
| CID3008861   | HSD11B1 | predicted |
| CID21594154  | HSD11B1 | predicted |
| CID5742691   | ABCB1   | predicted |
| CID5742693   | ABCB1   | predicted |
| CID10730594  | EED     | predicted |
| CID11742062  | PTGES   | predicted |

|              |         |           |
|--------------|---------|-----------|
| CID10423983  | PTGES   | predicted |
| CID101040104 | LMNA    | predicted |
| CID101040105 | LMNA    | predicted |
| CID10092871  | ESR2    | predicted |
| CID10720420  | MAPT    | predicted |
| CID10532385  | ACHE    | predicted |
| CID10788255  | ABCG2   | predicted |
| CID101040112 | RAB9A   | predicted |
| CID74223810  | ABCG2   | predicted |
| CID101040113 | LMNA    | predicted |
| CID101040110 | PTPN1   | predicted |
| CID101040111 | CYP19A1 | predicted |
| CID101040114 | ABCG2   | predicted |
| CID101040115 | MAPK1   | predicted |
| CID219592    | STAT3   | predicted |
| CID44257393  | LMNA    | predicted |
| CID1738124   | CYP3A4  | predicted |
| CID101243871 | TDP1    | predicted |
| CID16592     | SOAT1   | predicted |
| CID5281675   | RAB9A   | predicted |
| CID5320582   | TDP1    | predicted |
| CID3008860   | TNF     | predicted |
| CID442433    | TDP1    | predicted |
| CID11948668  | RAB9A   | predicted |
| CID3008858   | PRKCD   | predicted |
| CID14378605  | RAB9A   | predicted |
| CID73981590  | RAB9A   | predicted |
| CID10787     | CA9     | predicted |
| CID5317532   | LMNA    | predicted |
| CID87730829  | CA2     | predicted |
| CID14523449  | SMN1    | predicted |
| CID138753594 | RAB9A   | predicted |
| CID610933    | ALDH1A1 | predicted |
| CID70859637  | TDP1    | predicted |
| CID3004155   | TSHR    | predicted |
| CID53463561  | CHRNA2  | predicted |
| CID13914606  | HSD11B1 | predicted |
| CID76551288  | TSHR    | predicted |
| CID5281152   | LMNA    | predicted |
| CID24814     | NQO2    | predicted |
| CID100058    | RAB9A   | predicted |
| CID5316844   | NPC1    | predicted |
| CID10970376  | MAOA    | predicted |
| CID9884033   | LMNA    | predicted |
| CID10741     | TDP1    | predicted |
| CID10715291  | RAB9A   | predicted |
| CID44195972  | LMNA    | predicted |
| CID6122937   | NT5E    | predicted |
| CID138714873 | TSHR    | predicted |
| CID4490286   | TSHR    | predicted |
| CID387101196 | CYP3A4  | predicted |
| CID45783213  | SMN1    | predicted |
| CID45783214  | SMN1    | predicted |
| CID1201518   | CYP3A4  | predicted |
| CID12445022  | MAPK1   | predicted |
| CID8417      | LMNA    | predicted |
| CID5280460   | TP53    | predicted |
| CID5316647   | SMN1    | predicted |

|              |         |           |
|--------------|---------|-----------|
| CID5281792   | SMN1    | predicted |
| CID196216    | CYP19A1 | predicted |
| CID519954    | SMN1    | predicted |
| CID5322049   | TDP1    | predicted |
| CID5322048   | MAOA    | predicted |
| CID22559443  | SMN1    | predicted |
| CID5281663   | CDC25B  | predicted |
| CID296191    | MAPT    | predicted |
| CID68252     | TSHR    | predicted |
| CID5372954   | TDP1    | predicted |
| CID1549106   | LMNA    | predicted |
| CID145627453 | HSD11B1 | predicted |
| CID7424      | CA3     | predicted |
| CID1309      | CYP2D6  | predicted |
| CID5321869   | RAB9A   | predicted |
| CID5321200   | BACE1   | predicted |
| CID4483044   | TSHR    | predicted |
| CID49824629  | AKR1B1  | predicted |
| CID5321859   | KDM4E   | predicted |
| CID3415719   | CYP2D6  | predicted |
| CID5320471   | KMT2A   | predicted |
| CID5321865   | RAB9A   | predicted |
| CID71307292  | MAOA    | predicted |
| CID21155632  | PTPN1   | predicted |
| CID547509    | BCHE    | predicted |
| CID5322076   | ALDH1A1 | predicted |
| CID124211    | CYP19A1 | predicted |
| CID14135334  | SMN1    | predicted |
| CID5321205   | TSHR    | predicted |
| CID4961358   | RAB9A   | predicted |
| CID20763017  | CYP3A4  | predicted |
| CID296119    | RAB9A   | predicted |
| CID445858    | CASP2   | predicted |
| CID22376357  | RAB9A   | predicted |
| CID119034    | MAPT    | predicted |
| CID6552009   | CYP3A4  | predicted |
| CID5284500   | KDM4E   | predicted |
| CID12309393  | CYP3A4  | predicted |
| CID101761    | HSD11B1 | predicted |
| CID6973640   | CYP3A4  | predicted |
| CID6321405   | CYP3A4  | predicted |
| CID1567554   | TSHR    | predicted |
| CID4220788   | TSHR    | predicted |
| CID20163303  | ACHE    | predicted |
| CID455809    | PTPN1   | predicted |
| CID3082025   | ABCG2   | predicted |
| CID6365403   | ALDH1A1 | predicted |
| CID73648     | MAOA    | predicted |
| CID8205      | HMGCR   | predicted |
| CID5320193   | LMNA    | predicted |
| CID338       | CA5A    | predicted |
| CID11095     | XDH     | predicted |
| CID5320384   | KMT2A   | predicted |
| CID22311     | ACHE    | predicted |
| CID26049     | MAPT    | predicted |
| CID5282745   | PPARD   | predicted |
| CID6438157   | MAPT    | predicted |
| CID274352    | LMNA    | predicted |

|             |          |           |
|-------------|----------|-----------|
| CID5316834  | NPC1     | predicted |
| CID5320475  | BACE1    | predicted |
| CID5316833  | KMT2A    | predicted |
| CID124869   | CDC25B   | predicted |
| CID9816931  | LMNA     | predicted |
| CID49773122 | CYP3A4   | predicted |
| CID402      | ALDH1A1  | predicted |
| CID111446   | GPBAR1   | predicted |
| CID15265    | ALOX5    | predicted |
| CID5351506  | NPC1     | predicted |
| CID5245     | MAPT     | predicted |
| CID767      | CA2      | predicted |
| CID370      | APEX1    | predicted |
| CID19009    | HSD17B10 | predicted |
| CID2353     | CYP3A4   | predicted |
| CID1115     | TDP1     | predicted |
| CID4068592  | HSD17B10 | predicted |
| CID14896    | GPBAR1   | predicted |
| CID6654     | GPBAR1   | predicted |
| CID638011   | LMNA     | predicted |
| CID521380   | ACHE     | predicted |
| CID608886   | HSD11B1  | predicted |
| CID520159   | CYP3A4   | predicted |
| CID10997578 | CYP2A6   | predicted |
| CID225      | CYP19A1  | predicted |
| CID223578   | CYP3A4   | predicted |
| CID10168    | ALOX15   | predicted |
| CID5281607  | KMT2A    | predicted |
| CID5255901  | SMN1     | predicted |
| CID471719   | BACE1    | predicted |
| CID5282747  | ALOX5    | predicted |
| CID61545    | ALDH1A1  | predicted |
| CID15241817 | ALDH1A1  | predicted |
| CID91520    | NPC1     | predicted |
| CID11186895 | HTR1A    | predicted |
| CID485077   | LMNA     | predicted |
| CID89047    | RAB9A    | predicted |
| CID12303797 | TSHR     | predicted |
| CID188516   | ALOX5    | predicted |
| CID5091219  | TSHR     | predicted |
| CID5320211  | CYP2D6   | predicted |
| CID2214     | TDP1     | predicted |
| CID289151   | XBP1     | predicted |
| CID23990    | ALOX15   | predicted |
| CID2537     | RAB9A    | predicted |
| CID6054     | HRH4     | predicted |
| CID5280450  | RECQL    | predicted |
| CID10465    | OXER1    | predicted |
| CID19725    | HSD11B1  | predicted |
| CID445638   | FABP3    | predicted |
| CID6989     | HPGD     | predicted |
| CID445070   | SMN1     | predicted |
| CID12313332 | NPC1     | predicted |
| CID379      | CYP2C19  | predicted |
| CID25240035 | TRPV1    | predicted |
| CID5280666  | HSD17B1  | predicted |
| CID521215   | HSD11B1  | predicted |
| CID522266   | CYP3A4   | predicted |



|              |          |           |
|--------------|----------|-----------|
| CID136330    | ALOX5    | predicted |
| CID6782      | ALDH1A1  | predicted |
| CID19602     | TDP1     | predicted |
| CID445639    | CNR1     | predicted |
| CID5385553   | CYP19A1  | predicted |
| CID5283316   | FAAH     | predicted |
| CID10703     | MAPT     | predicted |
| CID61041     | RAB9A    | predicted |
| CID519764    | ALDH1A1  | predicted |
| CID637511    | CYP2A6   | predicted |
| CID10467     | OXER1    | predicted |
| CID11197     | OXER1    | predicted |
| CID23443619  | TRPA1    | predicted |
| CID5246487   | HSD17B10 | predicted |
| CID5319551   | CYP3A4   | predicted |
| CID5280961   | HSD17B10 | predicted |
| CID8215      | OXER1    | predicted |
| CID5281601   | ABCB1    | predicted |
| CID5317346   | TDP1     | predicted |
| CID5315472   | CYP2C19  | predicted |
| CID5281767   | RECQL    | predicted |
| CID14240392  | NPC1     | predicted |
| CID5362828   | TNF      | predicted |
| CID5280379   | TSHR     | predicted |
| CID5281984   | RAB9A    | predicted |
| CID68352     | CA9      | predicted |
| CID108011    | TDP1     | predicted |
| CID441643    | SMN1     | predicted |
| CID25034024  | AKR1B1   | predicted |
| CID100938406 | AKR1B1   | predicted |
| CID14367555  | ALOX5    | predicted |
| CID14633000  | RAB9A    | predicted |
| CID5317598   | CYP3A4   | predicted |
| CID154699541 | ALDH1A1  | predicted |
| CID11068834  | PTPN1    | predicted |
| CID5316208   | ESR1     | predicted |
| CID45359845  | RAB9A    | predicted |
| CID14543212  | CYP19A1  | predicted |
| CID578234    | RAB9A    | predicted |
| CID14191393  | RAB9A    | predicted |
| CID387977    | SMN1     | predicted |
| CID3559861   | NPC1     | predicted |
| CID42608153  | CYP19A1  | predicted |
| CID131751498 | MAPK1    | predicted |
| CID101953463 | TSHR     | predicted |
| CID13347321  | MAPT     | predicted |
| CID14191392  | MPEG1    | predicted |
| CID10039429  | PTPN1    | predicted |
| CID13010829  | HCAR2    | predicted |
| CID10017580  | ALOX15   | predicted |
| CID13118283  | ESR1     | predicted |
| CID131752799 | CYP2C19  | predicted |
| CID14543213  | ALOX5    | predicted |
| CID14632997  | RAB9A    | predicted |
| CID14543199  | ALOX5    | predicted |
| CID11795     | TP53     | predicted |
| CID68073     | SMN1     | predicted |
| CID1550936   | LMNA     | predicted |

|              |         |           |
|--------------|---------|-----------|
| CID12314812  | MAPK1   | predicted |
| CID14543235  | CYP19A1 | predicted |
| CID9906039   | CYP2C19 | predicted |
| CID13347322  | TP53    | predicted |
| CID131752986 | TDP1    | predicted |
| CID57509469  | RAB9A   | predicted |
| CID75144776  | GPBAR1  | predicted |
| CID147446684 | RAB9A   | predicted |
| CID536436    | CYP19A1 | predicted |
| CID10797750  | PTPN1   | predicted |
| CID5312418   | PPARG   | predicted |
| CID5282751   | PPARG   | predicted |
| CID78178011  | CYP3A4  | predicted |
| CID71363803  | TSHR    | predicted |
| CID14107524  | TYR     | predicted |
| CID131752987 | NPC1    | predicted |
| CID14632996  | ALOX5   | predicted |
| CID13967857  | MPEG1   | predicted |
| CID519762    | CYP3A4  | predicted |
| CID14287395  | SMN1    | predicted |
| CID90476927  | TSHR    | predicted |
| CID637429    | KMT2A   | predicted |
| CID57509470  | GPBAR1  | predicted |
| CID14632994  | NPSR1   | predicted |
| CID78171602  | SMN1    | predicted |
| CID5469424   | TSHR    | predicted |
| CID14543197  | RAB9A   | predicted |
| CID15858385  | LMNA    | predicted |
| CID14633011  | RAB9A   | predicted |
| CID10955433  | ALDH1A1 | predicted |
| CID5324473   | TSHR    | predicted |
| CID44629981  | TSHR    | predicted |
| CID49777919  | TDP1    | predicted |
| CID14367556  | ALOX5   | predicted |
| CID626934    | LMNA    | predicted |
| CID969516    | RECQL   | predicted |
| CID6115      | THPO    | predicted |
| CID5324476   | TDP1    | predicted |
| CID5322095   | PPARG   | predicted |
| CID101682279 | HSD11B1 | predicted |
| CID161686    | SMN1    | predicted |
| CID323273    | SMN1    | predicted |
| CID23274265  | RAB9A   | predicted |
| CID5316837   | NPC1    | predicted |
| CID2528      | PSMB1   | predicted |
| CID5281614   | IDE     | predicted |
| CID440735    | GSTP1   | predicted |
| CID12302281  | CYP3A4  | predicted |
| CID10051276  | HSD11B1 | predicted |
| CID12302289  | CYP3A4  | predicted |
| CID12302290  | CYP3A4  | predicted |
| CID11197650  | TDP1    | predicted |
| CID5280653   | TDP1    | predicted |
| CID11373178  | TDP1    | predicted |
| CID11373177  | TDP1    | predicted |
| CID6440515   | TDP1    | predicted |
| CID5318717   | SMN1    | predicted |
| CID10004345  | CYP3A4  | predicted |

|              |         |           |
|--------------|---------|-----------|
| CID9824100   | TDP1    | predicted |
| CID6324916   | RAB9A   | predicted |
| CID84298     | RAB9A   | predicted |
| CID11962122  | RAB9A   | predicted |
| CID10842393  | TSHR    | predicted |
| CID5281232   | PTPN1   | predicted |
| CID5281233   | AKR1B1  | predicted |
| CID12315350  | TDP1    | predicted |
| CID6325021   | SMN1    | predicted |
| CID102404034 | AKR1B10 | predicted |
| CID21769778  | AKR1B10 | predicted |
| CID5281780   | TSHR    | predicted |
| CID5742692   | MAOA    | predicted |
| CID15480861  | CYP19A1 | predicted |
| CID442667    | ESR2    | predicted |
| CID5742694   | MAOA    | predicted |
| CID11372643  | SMN1    | predicted |
| CID11418267  | SMN1    | predicted |
| CID101675239 | RAB9A   | predicted |
| CID261859    | SMN1    | predicted |
| CID3008859   | TSHR    | predicted |
| CID101350248 | SMN1    | predicted |
| CID3082301   | SMN1    | predicted |
| CID14077819  | ESR1    | predicted |
| CID219100    | ALDH1A1 | predicted |
| CID3008861   | PRKCD   | predicted |
| CID21594154  | CYP3A4  | predicted |
| CID5742691   | MAOA    | predicted |
| CID5742693   | MAOA    | predicted |
| CID10730594  | ESR2    | predicted |
| CID11742062  | BACE1   | predicted |
| CID10423983  | EED     | predicted |
| CID101040104 | TDP1    | predicted |
| CID101040105 | ACHE    | predicted |
| CID10092871  | PTGS1   | predicted |
| CID10720420  | ESR2    | predicted |
| CID10532385  | ALDH1A1 | predicted |
| CID10788255  | MAOA    | predicted |
| CID101040112 | MAPK1   | predicted |
| CID74223810  | TDP1    | predicted |
| CID101040113 | PTPN1   | predicted |
| CID101040110 | KMT2A   | predicted |
| CID101040111 | RAB9A   | predicted |
| CID101040114 | MAOA    | predicted |
| CID101040115 | PTPN1   | predicted |
| CID219592    | ACHE    | predicted |
| CID44257393  | BACE1   | predicted |
| CID1738124   | GPBAR1  | predicted |
| CID101243871 | SMN1    | predicted |
| CID16592     | ALDH1A1 | predicted |
| CID5281675   | LMNA    | predicted |
| CID5320582   | SMN1    | predicted |
| CID3008860   | NR1H3   | predicted |
| CID442433    | SMN1    | predicted |
| CID11948668  | SMN1    | predicted |
| CID3008858   | TSHR    | predicted |
| CID14378605  | SMN1    | predicted |
| CID73981590  | SMN1    | predicted |

|              |          |           |
|--------------|----------|-----------|
| CID10787     | CA1      | predicted |
| CID5317532   | ESR1     | predicted |
| CID87730829  | MAPT     | predicted |
| CID14523449  | TDP1     | predicted |
| CID138753594 | AKR1B1   | predicted |
| CID610933    | BACE1    | predicted |
| CID70859637  | MAPT     | predicted |
| CID3004155   | SMN1     | predicted |
| CID53463561  | CYP2D6   | predicted |
| CID13914606  | TSHR     | predicted |
| CID76551288  | SMN1     | predicted |
| CID5281152   | SOAT1    | predicted |
| CID24814     | CA5B     | predicted |
| CID100058    | SMN1     | predicted |
| CID5316844   | MAOA     | predicted |
| CID10970376  | CYP19A1  | predicted |
| CID9884033   | MAOA     | predicted |
| CID10741     | LMNA     | predicted |
| CID10715291  | NPC1     | predicted |
| CID44195972  | ABCG2    | predicted |
| CID6122937   | FNTB     | predicted |
| CID138714873 | AKR1B1   | predicted |
| CID4490286   | RAB9A    | predicted |
| CID387101196 | KMT2A    | predicted |
| CID45783213  | RAB9A    | predicted |
| CID45783214  | RAB9A    | predicted |
| CID1201518   | HSD11B1  | predicted |
| CID12445022  | TP53     | predicted |
| CID8417      | NPC1     | predicted |
| CID5280460   | ALOX15   | predicted |
| CID5316647   | TSHR     | predicted |
| CID5281792   | KDM4E    | predicted |
| CID196216    | ALOX5    | predicted |
| CID519954    | ALDH1A1  | predicted |
| CID5322049   | PTPN1    | predicted |
| CID5322048   | RAB9A    | predicted |
| CID22559443  | ALDH1A1  | predicted |
| CID5281663   | MAP2K1   | predicted |
| CID296191    | CYP3A4   | predicted |
| CID68252     | TYR      | predicted |
| CID5372954   | AKR1C3   | predicted |
| CID1549106   | AKR1C3   | predicted |
| CID145627453 | CYP3A4   | predicted |
| CID7424      | HSD17B10 | predicted |
| CID1309      | CYP2C19  | predicted |
| CID5321869   | NPC1     | predicted |
| CID5321200   | LMNA     | predicted |
| CID4483044   | CYP3A4   | predicted |
| CID49824629  | TSHR     | predicted |
| CID5321859   | CYP19A1  | predicted |
| CID3415719   | ABCG2    | predicted |
| CID5320471   | ABCB1    | predicted |
| CID5321865   | NPC1     | predicted |
| CID71307292  | LMNA     | predicted |
| CID21155632  | LMNA     | predicted |
| CID547509    | OPRM1    | predicted |
| CID5322076   | TSHR     | predicted |
| CID124211    | ALDH1A1  | predicted |

|             |         |           |
|-------------|---------|-----------|
| CID14135334 | AKR1B1  | predicted |
| CID5321205  | ALDH1A1 | predicted |
| CID4961358  | TDP1    | predicted |
| CID20763017 | HSD11B1 | predicted |
| CID296119   | CYP3A4  | predicted |
| CID445858   | TDP1    | predicted |
| CID22376357 | TDP1    | predicted |
| CID119034   | CYP3A4  | predicted |
| CID6552009  | HSD11B1 | predicted |
| CID5284500  | RAB9A   | predicted |
| CID12309393 | TNF     | predicted |
| CID101761   | CYP3A4  | predicted |
| CID6973640  | HSD11B1 | predicted |
| CID6321405  | HSD11B1 | predicted |
| CID1567554  | RAB9A   | predicted |
| CID4220788  | TNF     | predicted |
| CID20163303 | ALDH1A1 | predicted |
| CID455809   | RAB9A   | predicted |
| CID3082025  | KMT2A   | predicted |
| CID6365403  | HTT     | predicted |
| CID73648    | BACE1   | predicted |
| CID8205     | ALOX5   | predicted |
| CID5320193  | MAPT    | predicted |
| CID338      | CA4     | predicted |
| CID11095    | GSTP1   | predicted |
| CID5320384  | ALDH1A1 | predicted |
| CID22311    | ALDH1A1 | predicted |
| CID26049    | CYP3A4  | predicted |
| CID5282745  | OXER1   | predicted |
| CID6438157  | ALOX5   | predicted |
| CID274352   | CDK5R1  | predicted |
| CID5316834  | CYP19A1 | predicted |
| CID5320475  | RAB9A   | predicted |
| CID5316833  | ALDH1A1 | predicted |
| CID124869   | CYP3A4  | predicted |
| CID9816931  | RAB9A   | predicted |
| CID49773122 | GDA     | predicted |
| CID402      | HTT     | predicted |
| CID111446   | TSHR    | predicted |
| CID15265    | TRPV1   | predicted |
| CID5351506  | IL2     | predicted |
| CID5245     | TSHR    | predicted |
| CID767      | CA1     | predicted |
| CID370      | KMT2A   | predicted |
| CID19009    | MAPK1   | predicted |
| CID2353     | LMNA    | predicted |
| CID1115     | CYP3A4  | predicted |
| CID4068592  | TDP1    | predicted |
| CID14896    | HSD11B1 | predicted |
| CID6654     | HSD11B1 | predicted |
| CID638011   | ALOX15  | predicted |
| CID521380   | ALDH1A1 | predicted |
| CID608886   | CYP3A4  | predicted |
| CID520159   | PPARG   | predicted |
| CID10997578 | MAPT    | predicted |
| CID225      | TSHR    | predicted |
| CID223578   | TNF     | predicted |
| CID10168    | KDM4E   | predicted |

|             |          |           |
|-------------|----------|-----------|
| CID5281607  | HSD17B1  | predicted |
| CID5255901  | TDP1     | predicted |
| CID471719   | NPC1     | predicted |
| CID5282747  | CYP3A4   | predicted |
| CID61545    | APOBEC3G | predicted |
| CID15241817 | APOBEC3G | predicted |
| CID91520    | TDP1     | predicted |
| CID11186895 | CYP2D6   | predicted |
| CID485077   | F3       | predicted |
| CID89047    | NPC1     | predicted |
| CID12303797 | RAB9A    | predicted |
| CID188516   | IDO1     | predicted |
| CID5091219  | NPC1     | predicted |
| CID5320211  | ALDH1A1  | predicted |
| CID2214     | NPC1     | predicted |
| CID289151   | CYP3A4   | predicted |
| CID23990    | KMT2A    | predicted |
| CID2537     | RECQL    | predicted |
| CID6054     | NISCH    | predicted |
| CID5280450  | FABP1    | predicted |
| CID10465    | MPEG1    | predicted |
| CID19725    | RAB9A    | predicted |
| CID445638   | FABP2    | predicted |
| CID6989     | CYP2A13  | predicted |
| CID445070   | MAP2K1   | predicted |
| CID12313332 | POLB     | predicted |
| CID379      | ALDH1A1  | predicted |
| CID25240035 | MAPT     | predicted |
| CID5280666  | PLIN1    | predicted |
| CID521215   | RAB9A    | predicted |
| CID522266   | TSHR     | predicted |
| CID136330   | CYP19A1  | predicted |
| CID6782     | CDC25B   | predicted |
| CID19602    | CNR2     | predicted |
| CID445639   | HSF1     | predicted |
| CID5385553  | TDP1     | predicted |
| CID5283316  | CNR1     | predicted |
| CID10703    | CYP3A4   | predicted |
| CID61041    | TDP1     | predicted |
| CID519764   | ACHE     | predicted |
| CID637511   | CYP3A4   | predicted |
| CID10467    | MPEG1    | predicted |
| CID11197    | MPEG1    | predicted |
| CID23443619 | ALOX15   | predicted |
| CID5246487  | LMNA     | predicted |
| CID5319551  | HSD11B1  | predicted |
| CID5280961  | CYP1A1   | predicted |
| CID8215     | MPEG1    | predicted |
| CID5281601  | MAOA     | predicted |
| CID5317346  | AKR1B10  | predicted |
| CID5315472  | ALDH1A1  | predicted |
| CID5281767  | CYP2C19  | predicted |
| CID14240392 | SMN1     | predicted |
| CID5362828  | GPBAR1   | predicted |
| CID5280379  | SMN1     | predicted |
| CID5281984  | SMN1     | predicted |
| CID68352    | TDP1     | predicted |
| CID108011   | RAB9A    | predicted |

|              |          |           |
|--------------|----------|-----------|
| CID441643    | RAB9A    | predicted |
| CID25034024  | RAB9A    | predicted |
| CID100938406 | RAB9A    | predicted |
| CID14367555  | ALDH1A1  | predicted |
| CID14633000  | CYP19A1  | predicted |
| CID5317598   | CYP19A1  | predicted |
| CID154699541 | TDP1     | predicted |
| CID11068834  | RAB9A    | predicted |
| CID5316208   | MAPK1    | predicted |
| CID45359845  | ESR1     | predicted |
| CID14543212  | NPSR1    | predicted |
| CID578234    | GPBAR1   | predicted |
| CID14191393  | TDP1     | predicted |
| CID387977    | TDP1     | predicted |
| CID3559861   | SMN1     | predicted |
| CID42608153  | ALOX5    | predicted |
| CID131751498 | TSHR     | predicted |
| CID101953463 | ALDH1A1  | predicted |
| CID13347321  | CYP3A4   | predicted |
| CID14191392  | TNF      | predicted |
| CID10039429  | ESR1     | predicted |
| CID13010829  | RAB9A    | predicted |
| CID10017580  | RAB9A    | predicted |
| CID13118283  | ALDH1A1  | predicted |
| CID131752799 | ALOX5    | predicted |
| CID14543213  | NPSR1    | predicted |
| CID14632997  | CYP19A1  | predicted |
| CID14543199  | RAB9A    | predicted |
| CID11795     | AHR      | predicted |
| CID68073     | HSD17B10 | predicted |
| CID1550936   | TP53     | predicted |
| CID12314812  | CYP2A6   | predicted |
| CID14543235  | GPBAR1   | predicted |
| CID9906039   | MAPK1    | predicted |
| CID13347322  | SMN1     | predicted |
| CID131752986 | TSHR     | predicted |
| CID57509469  | NPC1     | predicted |
| CID75144776  | NPC1     | predicted |
| CID147446684 | NPC1     | predicted |
| CID536436    | SMN1     | predicted |
| CID10797750  | CYP3A4   | predicted |
| CID5312418   | MAPT     | predicted |
| CID5282751   | MAPT     | predicted |
| CID78178011  | TDP1     | predicted |
| CID71363803  | GPBAR1   | predicted |
| CID14107524  | CNR2     | predicted |
| CID131752987 | TDP1     | predicted |
| CID14632996  | RAB9A    | predicted |
| CID13967857  | CYP19A1  | predicted |
| CID519762    | ALOX5    | predicted |
| CID14287395  | RAB9A    | predicted |
| CID90476927  | EED      | predicted |
| CID637429    | CA9      | predicted |
| CID57509470  | ALOX5    | predicted |
| CID14632994  | TSHR     | predicted |
| CID78171602  | TDP1     | predicted |
| CID5469424   | CYP2C9   | predicted |
| CID14543197  | CYP19A1  | predicted |

|              |          |           |
|--------------|----------|-----------|
| CID15858385  | CYP3A4   | predicted |
| CID14633011  | CYP19A1  | predicted |
| CID10955433  | TSHR     | predicted |
| CID5324473   | KMT2A    | predicted |
| CID44629981  | ALDH1A1  | predicted |
| CID49777919  | EGFR     | predicted |
| CID14367556  | ALDH1A1  | predicted |
| CID626934    | TDP1     | predicted |
| CID969516    | CYP2C19  | predicted |
| CID6115      | CYP2C19  | predicted |
| CID5324476   | NPC1     | predicted |
| CID5322095   | SMN1     | predicted |
| CID101682279 | SMN1     | predicted |
| CID161686    | HSD11B1  | predicted |
| CID323273    | RAB9A    | predicted |
| CID23274265  | ALDH1A1  | predicted |
| CID5316837   | ALDH1A1  | predicted |
| CID2528      | PSMB2    | predicted |
| CID5281614   | ALDH1A1  | predicted |
| CID440735    | ABL1     | predicted |
| CID12302281  | RAB9A    | predicted |
| CID10051276  | RAB9A    | predicted |
| CID12302289  | RAB9A    | predicted |
| CID12302290  | RAB9A    | predicted |
| CID11197650  | RAB9A    | predicted |
| CID5280653   | RAB9A    | predicted |
| CID11373178  | RAB9A    | predicted |
| CID11373177  | RAB9A    | predicted |
| CID6440515   | RAB9A    | predicted |
| CID5318717   | NPC1     | predicted |
| CID10004345  | RAB9A    | predicted |
| CID9824100   | CYP19A1  | predicted |
| CID6324916   | TDP1     | predicted |
| CID84298     | HSP90AA1 | predicted |
| CID11962122  | TSHR     | predicted |
| CID10842393  | TDP1     | predicted |
| CID5281232   | TP53     | predicted |
| CID5281233   | TSHR     | predicted |
| CID12315350  | RAB9A    | predicted |
| CID6325021   | RAB9A    | predicted |
| CID102404034 | RAB9A    | predicted |
| CID21769778  | RAB9A    | predicted |
| CID5281780   | TDP1     | predicted |
| CID5742692   | KMT2A    | predicted |
| CID15480861  | MAPT     | predicted |
| CID442667    | PTPRC    | predicted |
| CID5742694   | ALDH1A1  | predicted |
| CID11372643  | RAB9A    | predicted |
| CID11418267  | TDP1     | predicted |
| CID101675239 | TDP1     | predicted |
| CID261859    | HSD17B10 | predicted |
| CID3008859   | PRKCD    | predicted |
| CID101350248 | TDP1     | predicted |
| CID3082301   | RAB9A    | predicted |
| CID14077819  | RAB9A    | predicted |
| CID219100    | NPC1     | predicted |
| CID3008861   | MAPT     | predicted |
| CID21594154  | RAB9A    | predicted |



|              |         |           |
|--------------|---------|-----------|
| CID5742691   | CA9     | predicted |
| CID5742693   | ALDH1A1 | predicted |
| CID10730594  | CYP2A6  | predicted |
| CID11742062  | LMNA    | predicted |
| CID10423983  | NPC1    | predicted |
| CID101040104 | KMT2A   | predicted |
| CID101040105 | MAPK1   | predicted |
| CID10092871  | ALDH1A1 | predicted |
| CID10720420  | EED     | predicted |
| CID10532385  | BACE1   | predicted |
| CID10788255  | MAPK1   | predicted |
| CID101040112 | NPC1    | predicted |
| CID74223810  | ACHE    | predicted |
| CID101040113 | MAPK1   | predicted |
| CID101040110 | RAB9A   | predicted |
| CID101040111 | NPC1    | predicted |
| CID101040114 | RAB9A   | predicted |
| CID101040115 | TDP1    | predicted |
| CID219592    | MAPT    | predicted |
| CID44257393  | KMT2A   | predicted |
| CID1738124   | CYP19A1 | predicted |
| CID101243871 | RAB9A   | predicted |
| CID16592     | LMNA    | predicted |
| CID5281675   | BACE1   | predicted |
| CID5320582   | RAB9A   | predicted |
| CID3008860   | MAPT    | predicted |
| CID442433    | RAB9A   | predicted |
| CID11948668  | TDP1    | predicted |
| CID3008858   | CYP3A4  | predicted |
| CID14378605  | TDP1    | predicted |
| CID73981590  | TDP1    | predicted |
| CID10787     | TDP1    | predicted |
| CID5317532   | CYP3A4  | predicted |
| CID87730829  | ITGB3   | predicted |
| CID14523449  | MAPT    | predicted |
| CID138753594 | TSHR    | predicted |
| CID610933    | RAB9A   | predicted |
| CID70859637  | SMN1    | predicted |
| CID3004155   | NPC1    | predicted |
| CID53463561  | HRH3    | predicted |
| CID13914606  | PRKCD   | predicted |
| CID76551288  | RAB9A   | predicted |
| CID5281152   | PPARG   | predicted |
| CID24814     | CA5A    | predicted |
| CID100058    | TDP1    | predicted |
| CID5316844   | KMT2A   | predicted |
| CID10970376  | ALDH1A1 | predicted |
| CID9884033   | TDP1    | predicted |
| CID10741     | MAOA    | predicted |
| CID10715291  | KMT2A   | predicted |
| CID44195972  | RAB9A   | predicted |
| CID6122937   | TRPA1   | predicted |
| CID138714873 | RAB9A   | predicted |
| CID4490286   | TDP1    | predicted |
| CID387101196 | ALDH1A1 | predicted |
| CID45783213  | TSHR    | predicted |
| CID45783214  | TDP1    | predicted |
| CID1201518   | RAB9A   | predicted |

|              |          |           |
|--------------|----------|-----------|
| CID12445022  | ALDH1A1  | predicted |
| CID8417      | ACHE     | predicted |
| CID5280460   | CA3      | predicted |
| CID5316647   | AKR1B10  | predicted |
| CID5281792   | HSD17B10 | predicted |
| CID196216    | MPEG1    | predicted |
| CID519954    | TDP1     | predicted |
| CID5322049   | ALDH1A1  | predicted |
| CID5322048   | KDM4E    | predicted |
| CID22559443  | RAB9A    | predicted |
| CID5281663   | HTR6     | predicted |
| CID296191    | AKR1B10  | predicted |
| CID68252     | TDP1     | predicted |
| CID5372954   | TP53     | predicted |
| CID1549106   | CA1      | predicted |
| CID145627453 | RAB9A    | predicted |
| CID7424      | HSD17B3  | predicted |
| CID1309      | DRD2     | predicted |
| CID5321869   | KMT2A    | predicted |
| CID5321200   | MAPK1    | predicted |
| CID4483044   | SMN1     | predicted |
| CID49824629  | NPC1     | predicted |
| CID5321859   | RAB9A    | predicted |
| CID3415719   | LMNA     | predicted |
| CID5320471   | RAB9A    | predicted |
| CID5321865   | KMT2A    | predicted |
| CID71307292  | MAPK1    | predicted |
| CID21155632  | MAOA     | predicted |
| CID547509    | CYP3A4   | predicted |
| CID5322076   | LMNA     | predicted |
| CID124211    | KMT2A    | predicted |
| CID14135334  | RAB9A    | predicted |
| CID5321205   | LMNA     | predicted |
| CID4961358   | NPC1     | predicted |
| CID20763017  | SHBG     | predicted |
| CID296119    | GPBAR1   | predicted |
| CID445858    | LMNA     | predicted |
| CID22376357  | NPC1     | predicted |
| CID119034    | AKR1B10  | predicted |
| CID6552009   | RAB9A    | predicted |
| CID5284500   | RECQL    | predicted |
| CID12309393  | HSD11B1  | predicted |
| CID101761    | RAB9A    | predicted |
| CID6973640   | RAB9A    | predicted |
| CID6321405   | RAB9A    | predicted |
| CID1567554   | CA9      | predicted |
| CID4220788   | HSD11B1  | predicted |
| CID20163303  | TDP1     | predicted |
| CID455809    | TSHR     | predicted |
| CID3082025   | TSHR     | predicted |
| CID6365403   | IDO1     | predicted |
| CID73648     | CYP19A1  | predicted |
| CID8205      | ALOX15   | predicted |
| CID5320193   | MPEG1    | predicted |
| CID338       | CA5B     | predicted |
| CID11095     | ABL1     | predicted |
| CID5320384   | MCL1     | predicted |
| CID22311     | CYP19A1  | predicted |

|             |          |           |
|-------------|----------|-----------|
| CID26049    | GPBAR1   | predicted |
| CID5282745  | FAAH     | predicted |
| CID6438157  | CYP3A4   | predicted |
| CID274352   | CYP11B1  | predicted |
| CID5316834  | RAB9A    | predicted |
| CID5320475  | MAOA     | predicted |
| CID5316833  | RAB9A    | predicted |
| CID124869   | MCL1     | predicted |
| CID9816931  | TDP1     | predicted |
| CID49773122 | TSHR     | predicted |
| CID402      | IDO1     | predicted |
| CID111446   | PRKCA    | predicted |
| CID15265    | CNR2     | predicted |
| CID5351506  | AKR1B1   | predicted |
| CID5245     | CYP3A4   | predicted |
| CID767      | TDP1     | predicted |
| CID370      | GLA      | predicted |
| CID19009    | CYP2C9   | predicted |
| CID2353     | BCHE     | predicted |
| CID1115     | MAPT     | predicted |
| CID4068592  | THRB     | predicted |
| CID14896    | SLCO1B3  | predicted |
| CID6654     | SLCO1B3  | predicted |
| CID638011   | KMT2A    | predicted |
| CID521380   | RAB9A    | predicted |
| CID608886   | RAB9A    | predicted |
| CID520159   | FAAH     | predicted |
| CID10997578 | CYP3A4   | predicted |
| CID225      | G6PD     | predicted |
| CID223578   | SMN1     | predicted |
| CID10168    | TP53     | predicted |
| CID5281607  | ALOX15   | predicted |
| CID5255901  | CYP19A1  | predicted |
| CID471719   | CYP19A1  | predicted |
| CID5282747  | TRPV1    | predicted |
| CID61545    | PLIN5    | predicted |
| CID15241817 | PLIN5    | predicted |
| CID91520    | AKR1B1   | predicted |
| CID11186895 | HTR4     | predicted |
| CID485077   | CDK2     | predicted |
| CID89047    | CYP2C19  | predicted |
| CID12303797 | KMT2A    | predicted |
| CID188516   | HPGD     | predicted |
| CID5091219  | SMN1     | predicted |
| CID5320211  | CYP2C19  | predicted |
| CID2214     | KDM4E    | predicted |
| CID289151   | ACHE     | predicted |
| CID23990    | CNR2     | predicted |
| CID2537     | HPGD     | predicted |
| CID6054     | HTR1E    | predicted |
| CID5280450  | HSD17B10 | predicted |
| CID10465    | FAAH     | predicted |
| CID19725    | SLCO1B3  | predicted |
| CID445638   | FABP1    | predicted |
| CID6989     | HTT      | predicted |
| CID445070   | ABCB11   | predicted |
| CID12313332 | AKR1B1   | predicted |
| CID379      | MAPT     | predicted |

|              |          |           |
|--------------|----------|-----------|
| CID25240035  | CNR2     | predicted |
| CID5280666   | CYP3A4   | predicted |
| CID521215    | SMN1     | predicted |
| CID522266    | RAB9A    | predicted |
| CID136330    | RAB9A    | predicted |
| CID6782      | BCL2     | predicted |
| CID19602     | CNR1     | predicted |
| CID445639    | CNR2     | predicted |
| CID5385553   | AKR1B1   | predicted |
| CID5283316   | TRPV1    | predicted |
| CID10703     | TYR      | predicted |
| CID61041     | TP53     | predicted |
| CID519764    | KMT2A    | predicted |
| CID637511    | CTSL     | predicted |
| CID10467     | FAAH     | predicted |
| CID11197     | FAAH     | predicted |
| CID23443619  | APEX1    | predicted |
| CID5246487   | RELA     | predicted |
| CID5319551   | SHBG     | predicted |
| CID5280961   | SLC22A1  | predicted |
| CID8215      | FAAH     | predicted |
| CID5281601   | ADORA3   | predicted |
| CID5317346   | RAB9A    | predicted |
| CID5315472   | HSD17B10 | predicted |
| CID5281767   | NFKB1    | predicted |
| CID14240392  | GPBAR1   | predicted |
| CID5362828   | SMN1     | predicted |
| CID5280379   | HSD11B1  | predicted |
| CID5281984   | HSD11B1  | predicted |
| CID68352     | RAB9A    | predicted |
| CID108011    | HSP90AA1 | predicted |
| CID441643    | HSP90AA1 | predicted |
| CID25034024  | NPC1     | predicted |
| CID100938406 | NPC1     | predicted |
| CID14367555  | MPEG1    | predicted |
| CID14633000  | SMN1     | predicted |
| CID5317598   | HTR2B    | predicted |
| CID154699541 | PTPN1    | predicted |
| CID11068834  | ACHE     | predicted |
| CID5316208   | TP53     | predicted |
| CID45359845  | NPC1     | predicted |
| CID14543212  | ALOX5    | predicted |
| CID578234    | NPC1     | predicted |
| CID14191393  | KMT2A    | predicted |
| CID387977    | CYP19A1  | predicted |
| CID3559861   | GPBAR1   | predicted |
| CID42608153  | MPEG1    | predicted |
| CID131751498 | ESR2     | predicted |
| CID101953463 | RAB9A    | predicted |
| CID13347321  | PTPN1    | predicted |
| CID14191392  | ALDH1A1  | predicted |
| CID10039429  | TAAR1    | predicted |
| CID13010829  | CA2      | predicted |
| CID10017580  | PTPN1    | predicted |
| CID13118283  | TP53     | predicted |
| CID131752799 | PTPN1    | predicted |
| CID14543213  | MPEG1    | predicted |
| CID14632997  | SMN1     | predicted |

|              |         |           |
|--------------|---------|-----------|
| CID14543199  | GPBAR1  | predicted |
| CID11795     | ATM     | predicted |
| CID68073     | TP53    | predicted |
| CID1550936   | CA1     | predicted |
| CID12314812  | LMNA    | predicted |
| CID14543235  | SMN1    | predicted |
| CID9906039   | CYP2C9  | predicted |
| CID13347322  | RAB9A   | predicted |
| CID131752986 | NPC1    | predicted |
| CID57509469  | KMT2A   | predicted |
| CID75144776  | RAB9A   | predicted |
| CID147446684 | KMT2A   | predicted |
| CID536436    | GPBAR1  | predicted |
| CID10797750  | ALDH1A1 | predicted |
| CID5312418   | TRPV1   | predicted |
| CID5282751   | TRPV1   | predicted |
| CID78178011  | GPBAR1  | predicted |
| CID71363803  | TNF     | predicted |
| CID14107524  | CYP3A4  | predicted |
| CID131752987 | TSHR    | predicted |
| CID14632996  | ALDH1A1 | predicted |
| CID13967857  | ALDH1A1 | predicted |
| CID519762    | ALDH1A1 | predicted |
| CID14287395  | GPBAR1  | predicted |
| CID90476927  | HPGD    | predicted |
| CID637429    | ABCG2   | predicted |
| CID57509470  | SMN1    | predicted |
| CID14632994  | MAPT    | predicted |
| CID78171602  | KMT2A   | predicted |
| CID5469424   | CYP2C19 | predicted |
| CID14543197  | ALOX5   | predicted |
| CID15858385  | TSHR    | predicted |
| CID14633011  | GPBAR1  | predicted |
| CID10955433  | ALOX15  | predicted |
| CID5324473   | PTPN1   | predicted |
| CID44629981  | ABCG2   | predicted |
| CID49777919  | AADAC   | predicted |
| CID14367556  | MPEG1   | predicted |
| CID626934    | ACHE    | predicted |
| CID969516    | NFKB1   | predicted |
| CID6115      | TDP1    | predicted |
| CID5324476   | TSHR    | predicted |
| CID5322095   | PTPN1   | predicted |
| CID101682279 | RAB9A   | predicted |
| CID161686    | RAB9A   | predicted |
| CID323273    | IL2     | predicted |
| CID23274265  | TDP1    | predicted |
| CID5316837   | RAB9A   | predicted |
| CID2528      | PSMB5   | predicted |
| CID5281614   | CDK5R1  | predicted |
| CID440735    | MAPK10  | predicted |
| CID12302281  | SMN1    | predicted |
| CID10051276  | SMN1    | predicted |
| CID12302289  | SMN1    | predicted |
| CID12302290  | SMN1    | predicted |
| CID11197650  | SMN1    | predicted |
| CID5280653   | SMN1    | predicted |
| CID11373178  | NPC1    | predicted |

|              |          |           |
|--------------|----------|-----------|
| CID11373177  | HSP90AA1 | predicted |
| CID6440515   | HSP90AA1 | predicted |
| CID5318717   | KMT2A    | predicted |
| CID10004345  | SMN1     | predicted |
| CID9824100   | BACE1    | predicted |
| CID6324916   | NPC1     | predicted |
| CID84298     | TDP1     | predicted |
| CID11962122  | AKR1B10  | predicted |
| CID10842393  | AKR1B1   | predicted |
| CID5281232   | SMN1     | predicted |
| CID5281233   | HSP90AA1 | predicted |
| CID12315350  | IL2      | predicted |
| CID6325021   | IL2      | predicted |
| CID102404034 | TDP1     | predicted |
| CID21769778  | TDP1     | predicted |
| CID5281780   | RAB9A    | predicted |
| CID5742692   | ALDH1A1  | predicted |
| CID15480861  | MAPK1    | predicted |
| CID442667    | PLA2G1B  | predicted |
| CID5742694   | RAB9A    | predicted |
| CID11372643  | IL2      | predicted |
| CID11418267  | HSP90AA1 | predicted |
| CID101675239 | KMT2A    | predicted |
| CID261859    | TP53     | predicted |
| CID3008859   | CYP3A4   | predicted |
| CID101350248 | HSP90AA1 | predicted |
| CID3082301   | IL2      | predicted |
| CID14077819  | PTPN1    | predicted |
| CID219100    | KMT2A    | predicted |
| CID3008861   | CYP3A4   | predicted |
| CID21594154  | SMN1     | predicted |
| CID5742691   | KMT2A    | predicted |
| CID5742693   | RAB9A    | predicted |
| CID10730594  | PTPRC    | predicted |
| CID11742062  | MAPK1    | predicted |
| CID10423983  | ESR2     | predicted |
| CID101040104 | TSHR     | predicted |
| CID101040105 | TSHR     | predicted |
| CID10092871  | BACE1    | predicted |
| CID10720420  | NPC1     | predicted |
| CID10532385  | CYP19A1  | predicted |
| CID10788255  | BACE1    | predicted |
| CID101040112 | PTPN1    | predicted |
| CID74223810  | MAPK1    | predicted |
| CID101040113 | RAB9A    | predicted |
| CID101040110 | BACE1    | predicted |
| CID101040111 | KMT2A    | predicted |
| CID101040114 | PTPN1    | predicted |
| CID101040115 | BACE1    | predicted |
| CID219592    | TERT     | predicted |
| CID44257393  | MAPK1    | predicted |
| CID1738124   | SMN1     | predicted |
| CID101243871 | NPC1     | predicted |
| CID16592     | APOBEC3G | predicted |
| CID5281675   | NPC1     | predicted |
| CID5320582   | IL2      | predicted |
| CID3008860   | TSHR     | predicted |
| CID442433    | IL2      | predicted |

|              |          |           |
|--------------|----------|-----------|
| CID11948668  | HSP90AA1 | predicted |
| CID3008858   | CYP19A1  | predicted |
| CID14378605  | HSP90AA1 | predicted |
| CID73981590  | HSP90AA1 | predicted |
| CID10787     | TYR      | predicted |
| CID5317532   | ACHE     | predicted |
| CID87730829  | TSHR     | predicted |
| CID14523449  | BLM      | predicted |
| CID138753594 | HSP90AA1 | predicted |
| CID610933    | NPC1     | predicted |
| CID70859637  | BCHE     | predicted |
| CID3004155   | GPBAR1   | predicted |
| CID53463561  | GPBAR1   | predicted |
| CID13914606  | CYP3A4   | predicted |
| CID76551288  | TDP1     | predicted |
| CID5281152   | MAPT     | predicted |
| CID24814     | HSD17B10 | predicted |
| CID100058    | NPC1     | predicted |
| CID5316844   | CYP19A1  | predicted |
| CID10970376  | RAB9A    | predicted |
| CID9884033   | MAPK1    | predicted |
| CID10741     | CYP19A1  | predicted |
| CID10715291  | LMNA     | predicted |
| CID44195972  | NPC1     | predicted |
| CID6122937   | TDP1     | predicted |
| CID138714873 | HSP90AA1 | predicted |
| CID4490286   | HSP90AA1 | predicted |
| CID387101196 | RAB9A    | predicted |
| CID45783213  | NPC1     | predicted |
| CID45783214  | NPC1     | predicted |
| CID1201518   | SHBG     | predicted |
| CID12445022  | ESR1     | predicted |
| CID8417      | RAB9A    | predicted |
| CID5280460   | CYP3A4   | predicted |
| CID5316647   | RAB9A    | predicted |
| CID5281792   | TSHR     | predicted |
| CID196216    | ALDH1A1  | predicted |
| CID519954    | CYP19A1  | predicted |
| CID5322049   | BACE1    | predicted |
| CID5322048   | ABCB1    | predicted |
| CID22559443  | TDP1     | predicted |
| CID5281663   | IDO1     | predicted |
| CID296191    | SMN1     | predicted |
| CID68252     | CNR2     | predicted |
| CID5372954   | CA1      | predicted |
| CID1549106   | PTPN1    | predicted |
| CID145627453 | SMN1     | predicted |
| CID7424      | MB       | predicted |
| CID1309      | TDP1     | predicted |
| CID5321869   | ALDH1A1  | predicted |
| CID5321200   | RAB9A    | predicted |
| CID4483044   | RAB9A    | predicted |
| CID49824629  | IL2      | predicted |
| CID5321859   | BACE1    | predicted |
| CID3415719   | ALDH1A1  | predicted |
| CID5320471   | NPC1     | predicted |
| CID5321865   | ABCB1    | predicted |
| CID71307292  | RAB9A    | predicted |

|             |         |           |
|-------------|---------|-----------|
| CID21155632 | MAPK1   | predicted |
| CID547509   | CHRNA2  | predicted |
| CID5322076  | NPC1    | predicted |
| CID124211   | RAB9A   | predicted |
| CID14135334 | PTPN1   | predicted |
| CID5321205  | NPC1    | predicted |
| CID4961358  | SMN1    | predicted |
| CID20763017 | RAB9A   | predicted |
| CID296119   | NPC1    | predicted |
| CID445858   | HSD17B3 | predicted |
| CID22376357 | IL2     | predicted |
| CID119034   | SMN1    | predicted |
| CID6552009  | SHBG    | predicted |
| CID5284500  | HPGD    | predicted |
| CID12309393 | SMN1    | predicted |
| CID101761   | SMN1    | predicted |
| CID6973640  | SHBG    | predicted |
| CID6321405  | SHBG    | predicted |
| CID1567554  | NPC1    | predicted |
| CID4220788  | CYP19A1 | predicted |
| CID20163303 | ALOX15  | predicted |
| CID455809   | TDP1    | predicted |
| CID3082025  | ALDH1A1 | predicted |
| CID6365403  | HDAC11  | predicted |
| CID73648    | ALDH1A1 | predicted |
| CID8205     | FAAH    | predicted |
| CID5320193  | HMGCR   | predicted |
| CID338      | CA3     | predicted |
| CID11095    | MAPK10  | predicted |
| CID5320384  | TDP1    | predicted |
| CID22311    | TP53    | predicted |
| CID26049    | HSD11B1 | predicted |
| CID5282745  | MPEG1   | predicted |
| CID6438157  | TRPV1   | predicted |
| CID274352   | CYP11B2 | predicted |
| CID5316834  | TDP1    | predicted |
| CID5320475  | TDP1    | predicted |
| CID5316833  | BACE1   | predicted |
| CID124869   | CYP19A1 | predicted |
| CID9816931  | MAOA    | predicted |
| CID49773122 | P2RX3   | predicted |
| CID402      | HDAC11  | predicted |
| CID111446   | CYP3A4  | predicted |
| CID15265    | CNR1    | predicted |
| CID5351506  | SMN1    | predicted |
| CID5245     | HCAR2   | predicted |
| CID767      | CA12    | predicted |
| CID370      | HIF1A   | predicted |
| CID19009    | SMN1    | predicted |
| CID2353     | TDP2    | predicted |
| CID1115     | RAB9A   | predicted |
| CID4068592  | POLB    | predicted |
| CID14896    | SLCO1B1 | predicted |
| CID6654     | SLCO1B1 | predicted |
| CID638011   | ACHE    | predicted |
| CID521380   | CYP19A1 | predicted |
| CID608886   | SMN1    | predicted |
| CID520159   | ALDH1A1 | predicted |



|             |         |           |
|-------------|---------|-----------|
| CID10997578 | TSHR    | predicted |
| CID225      | HSD11B1 | predicted |
| CID223578   | SHBG    | predicted |
| CID10168    | APEX1   | predicted |
| CID5281607  | TDP1    | predicted |
| CID5255901  | NPC1    | predicted |
| CID471719   | ALDH1A1 | predicted |
| CID5282747  | PPARG   | predicted |
| CID61545    | PLIN1   | predicted |
| CID15241817 | PLIN1   | predicted |
| CID91520    | SMN1    | predicted |
| CID11186895 | CYP2C19 | predicted |
| CID485077   | CYP2C19 | predicted |
| CID89047    | CYP2D6  | predicted |
| CID12303797 | TDP1    | predicted |
| CID188516   | CYP19A1 | predicted |
| CID5091219  | AKR1B10 | predicted |
| CID5320211  | ACHE    | predicted |
| CID2214     | ALDH1A1 | predicted |
| CID289151   | RAB9A   | predicted |
| CID23990    | TP53    | predicted |
| CID2537     | MAPK1   | predicted |
| CID6054     | HTR1D   | predicted |
| CID5280450  | TDP1    | predicted |
| CID10465    | FABP3   | predicted |
| CID19725    | SLCO1B1 | predicted |
| CID445638   | ABCB11  | predicted |
| CID6989     | PTGS1   | predicted |
| CID445070   | HTR3A   | predicted |
| CID12313332 | TDP1    | predicted |
| CID379      | HIF1A   | predicted |
| CID25240035 | PPARG   | predicted |
| CID5280666  | TDP1    | predicted |
| CID521215   | NPC1    | predicted |
| CID522266   | NPC1    | predicted |
| CID136330   | SMN1    | predicted |
| CID6782     | SMN1    | predicted |
| CID19602    | MPEG1   | predicted |
| CID445639   | SLCO1B3 | predicted |
| CID5385553  | IL2     | predicted |
| CID5283316  | PPARG   | predicted |
| CID10703    | ALDH1A1 | predicted |
| CID61041    | NPC1    | predicted |
| CID519764   | ALOX5   | predicted |
| CID637511   | ALOX15  | predicted |
| CID10467    | FABP3   | predicted |
| CID11197    | FABP3   | predicted |
| CID23443619 | KDM4E   | predicted |
| CID5246487  | CA3     | predicted |
| CID5319551  | NPC1    | predicted |
| CID5280961  | ALDH2   | predicted |
| CID8215     | FABP3   | predicted |
| CID5281601  | F3      | predicted |
| CID5317346  | AKR1B1  | predicted |
| CID5315472  | KMT2A   | predicted |
| CID5281767  | BLM     | predicted |
| CID14240392 | TDP1    | predicted |
| CID5362828  | ALOX5   | predicted |

|              |          |           |
|--------------|----------|-----------|
| CID5280379   | TNF      | predicted |
| CID5281984   | TNF      | predicted |
| CID68352     | KMT2A    | predicted |
| CID108011    | IL2      | predicted |
| CID441643    | IL2      | predicted |
| CID25034024  | HSP90AA1 | predicted |
| CID100938406 | HSP90AA1 | predicted |
| CID14367555  | RAB9A    | predicted |
| CID14633000  | ALOX5    | predicted |
| CID5317598   | ALDH1A1  | predicted |
| CID154699541 | RAB9A    | predicted |
| CID11068834  | MAPK1    | predicted |
| CID5316208   | SMN1     | predicted |
| CID45359845  | HSD11B1  | predicted |
| CID14543212  | ALDH1A1  | predicted |
| CID578234    | TDP1     | predicted |
| CID14191393  | NPC1     | predicted |
| CID387977    | NPC1     | predicted |
| CID3559861   | TDP1     | predicted |
| CID42608153  | TNF      | predicted |
| CID131751498 | EED      | predicted |
| CID101953463 | SLCO2B1  | predicted |
| CID13347321  | SMN1     | predicted |
| CID14191392  | CYP19A1  | predicted |
| CID10039429  | SMN1     | predicted |
| CID13010829  | CA12     | predicted |
| CID10017580  | KDM4E    | predicted |
| CID13118283  | TDP1     | predicted |
| CID131752799 | TSHR     | predicted |
| CID14543213  | ALDH1A1  | predicted |
| CID14632997  | ALOX5    | predicted |
| CID14543199  | SMN1     | predicted |
| CID11795     | MAPT     | predicted |
| CID68073     | ALDH1A1  | predicted |
| CID1550936   | ABCG2    | predicted |
| CID12314812  | TSHR     | predicted |
| CID14543235  | NPC1     | predicted |
| CID9906039   | ALOX15   | predicted |
| CID13347322  | ALDH1A1  | predicted |
| CID131752986 | TP53     | predicted |
| CID57509469  | TDP1     | predicted |
| CID75144776  | SMN1     | predicted |
| CID147446684 | TDP1     | predicted |
| CID536436    | RAB9A    | predicted |
| CID10797750  | KMT2A    | predicted |
| CID5312418   | CNR2     | predicted |
| CID5282751   | CNR2     | predicted |
| CID78178011  | TNF      | predicted |
| CID71363803  | CYP19A1  | predicted |
| CID14107524  | CNR1     | predicted |
| CID131752987 | CYP19A1  | predicted |
| CID14632996  | TDP1     | predicted |
| CID13967857  | GPBAR1   | predicted |
| CID519762    | CYP19A1  | predicted |
| CID14287395  | NPC1     | predicted |
| CID90476927  | ALDH1A1  | predicted |
| CID637429    | RAB9A    | predicted |
| CID57509470  | CYP19A1  | predicted |

|              |          |           |
|--------------|----------|-----------|
| CID14632994  | GPBAR1   | predicted |
| CID78171602  | RAB9A    | predicted |
| CID5469424   | HSD17B10 | predicted |
| CID14543197  | SMN1     | predicted |
| CID15858385  | ALOX15   | predicted |
| CID14633011  | ALOX5    | predicted |
| CID10955433  | KDM4E    | predicted |
| CID5324473   | CYP19A1  | predicted |
| CID44629981  | CYP2C19  | predicted |
| CID49777919  | KDM4E    | predicted |
| CID14367556  | RAB9A    | predicted |
| CID626934    | ALDH1A1  | predicted |
| CID969516    | BLM      | predicted |
| CID6115      | CYP3A4   | predicted |
| CID5324476   | CYP19A1  | predicted |
| CID5322095   | MPEG1    | predicted |
| CID101682279 | AKR1B10  | predicted |
| CID161686    | TDP1     | predicted |
| CID323273    | AKR1B1   | predicted |
| CID23274265  | KMT2A    | predicted |
| CID5316837   | ABCB1    | predicted |
| CID2528      | MAOA     | predicted |
| CID5281614   | CYP2C9   | predicted |
| CID440735    | CYP3A4   | predicted |
| CID12302281  | SHBG     | predicted |
| CID10051276  | SHBG     | predicted |
| CID12302289  | AKR1B10  | predicted |
| CID12302290  | AKR1B10  | predicted |
| CID11197650  | NPC1     | predicted |
| CID5280653   | NPC1     | predicted |
| CID11373178  | HSP90AA1 | predicted |
| CID11373177  | NPC1     | predicted |
| CID6440515   | NPC1     | predicted |
| CID5318717   | MAPK1    | predicted |
| CID10004345  | SHBG     | predicted |
| CID9824100   | POLB     | predicted |
| CID6324916   | HSP90AA1 | predicted |
| CID84298     | NPC1     | predicted |
| CID11962122  | AKR1B1   | predicted |
| CID10842393  | HSP90AA1 | predicted |
| CID5281232   | CA9      | predicted |
| CID5281233   | IL2      | predicted |
| CID12315350  | AKR1B1   | predicted |
| CID6325021   | NPC1     | predicted |
| CID102404034 | AKR1B1   | predicted |
| CID21769778  | AKR1B1   | predicted |
| CID5281780   | AKR1B1   | predicted |
| CID5742692   | RAB9A    | predicted |
| CID15480861  | BACE1    | predicted |
| CID442667    | CYP2A6   | predicted |
| CID5742694   | KMT2A    | predicted |
| CID11372643  | NPC1     | predicted |
| CID11418267  | NPC1     | predicted |
| CID101675239 | ALDH1A1  | predicted |
| CID261859    | ALDH1A1  | predicted |
| CID3008859   | CYP19A1  | predicted |
| CID101350248 | IL2      | predicted |
| CID3082301   | NPC1     | predicted |

|              |          |           |
|--------------|----------|-----------|
| CID14077819  | NPC1     | predicted |
| CID219100    | MAOA     | predicted |
| CID3008861   | RAB9A    | predicted |
| CID21594154  | SHBG     | predicted |
| CID5742691   | CA12     | predicted |
| CID5742693   | KMT2A    | predicted |
| CID10730594  | MAPK1    | predicted |
| CID11742062  | ALOX15   | predicted |
| CID10423983  | MAPK1    | predicted |
| CID101040104 | MAPK1    | predicted |
| CID101040105 | ESR2     | predicted |
| CID10092871  | EED      | predicted |
| CID10720420  | CYP19A1  | predicted |
| CID10532385  | MAPK1    | predicted |
| CID10788255  | ESR2     | predicted |
| CID101040112 | TDP1     | predicted |
| CID74223810  | ALDH1A1  | predicted |
| CID101040113 | NPC1     | predicted |
| CID101040110 | ACHE     | predicted |
| CID101040111 | BACE1    | predicted |
| CID101040114 | NPC1     | predicted |
| CID101040115 | RAB9A    | predicted |
| CID219592    | AKR1B1   | predicted |
| CID44257393  | ACHE     | predicted |
| CID1738124   | PPARG    | predicted |
| CID101243871 | HSP90AA1 | predicted |
| CID16592     | PTGS2    | predicted |
| CID5281675   | APEX1    | predicted |
| CID5320582   | NPC1     | predicted |
| CID3008860   | HSD11B1  | predicted |
| CID442433    | NPC1     | predicted |
| CID11948668  | NPC1     | predicted |
| CID3008858   | HSD11B1  | predicted |
| CID14378605  | NPC1     | predicted |
| CID73981590  | IL2      | predicted |
| CID10787     | CA2      | predicted |
| CID5317532   | CYP2D6   | predicted |
| CID87730829  | LMNA     | predicted |
| CID14523449  | CYP2D6   | predicted |
| CID138753594 | IL2      | predicted |
| CID610933    | KMT2A    | predicted |
| CID70859637  | TRPV1    | predicted |
| CID3004155   | AKR1B10  | predicted |
| CID53463561  | CYP3A4   | predicted |
| CID13914606  | CYP19A1  | predicted |
| CID76551288  | NPC1     | predicted |
| CID5281152   | PPARD    | predicted |
| CID24814     | PPARG    | predicted |
| CID100058    | HSP90AA1 | predicted |
| CID5316844   | BACE1    | predicted |
| CID10970376  | KMT2A    | predicted |
| CID9884033   | NPC1     | predicted |
| CID10741     | TSHR     | predicted |
| CID10715291  | CA9      | predicted |
| CID44195972  | ALDH1A1  | predicted |
| CID6122937   | L3MBTL1  | predicted |
| CID138714873 | IL2      | predicted |
| CID4490286   | NPC1     | predicted |

|              |          |           |
|--------------|----------|-----------|
| CID387101196 | NPC1     | predicted |
| CID45783213  | AKR1B1   | predicted |
| CID45783214  | AKR1B1   | predicted |
| CID1201518   | SMN1     | predicted |
| CID12445022  | SMN1     | predicted |
| CID8417      | TDP1     | predicted |
| CID5280460   | CA4      | predicted |
| CID5316647   | AKR1B1   | predicted |
| CID5281792   | AKR1B1   | predicted |
| CID196216    | SMN1     | predicted |
| CID519954    | RAB9A    | predicted |
| CID5322049   | KDM4E    | predicted |
| CID5322048   | NPC1     | predicted |
| CID22559443  | KMT2A    | predicted |
| CID5281663   | HTR5A    | predicted |
| CID296191    | RAB9A    | predicted |
| CID68252     | MAPK1    | predicted |
| CID5372954   | PTPN1    | predicted |
| CID1549106   | CA2      | predicted |
| CID145627453 | SHBG     | predicted |
| CID7424      | GLA      | predicted |
| CID1309      | SMN1     | predicted |
| CID5321869   | ABCB1    | predicted |
| CID5321200   | ACHE     | predicted |
| CID4483044   | CYP19A1  | predicted |
| CID49824629  | POLB     | predicted |
| CID5321859   | CA9      | predicted |
| CID3415719   | ACHE     | predicted |
| CID5320471   | MAPK1    | predicted |
| CID5321865   | ALDH1A1  | predicted |
| CID71307292  | KMT2A    | predicted |
| CID21155632  | RAB9A    | predicted |
| CID547509    | MAPT     | predicted |
| CID5322076   | RAB9A    | predicted |
| CID124211    | BACE1    | predicted |
| CID14135334  | NPC1     | predicted |
| CID5321205   | RAB9A    | predicted |
| CID4961358   | HSP90AA1 | predicted |
| CID20763017  | CYP19A1  | predicted |
| CID296119    | TDP1     | predicted |
| CID445858    | SERPINE1 | predicted |
| CID22376357  | SMN1     | predicted |
| CID119034    | RAB9A    | predicted |
| CID6552009   | SMN1     | predicted |
| CID5284500   | MAPK1    | predicted |
| CID12309393  | SHBG     | predicted |
| CID101761    | SHBG     | predicted |
| CID6973640   | SMN1     | predicted |
| CID6321405   | SMN1     | predicted |
| CID1567554   | ALDH1A1  | predicted |
| CID4220788   | SHBG     | predicted |
| CID20163303  | CYP19A1  | predicted |
| CID455809    | KMT2A    | predicted |
| CID3082025   | RAB9A    | predicted |
| CID6365403   | NT5E     | predicted |
| CID73648     | KMT2A    | predicted |
| CID8205      | SMN1     | predicted |
| CID5320193   | ALOX5    | predicted |

|             |          |           |
|-------------|----------|-----------|
| CID338      | HSD17B10 | predicted |
| CID11095    | CYP3A4   | predicted |
| CID5320384  | PTPN1    | predicted |
| CID22311    | SMN1     | predicted |
| CID26049    | PRKCA    | predicted |
| CID5282745  | FABP3    | predicted |
| CID6438157  | PPARG    | predicted |
| CID274352   | MAPT     | predicted |
| CID5316834  | SMN1     | predicted |
| CID5320475  | NPC1     | predicted |
| CID5316833  | NPC1     | predicted |
| CID124869   | ALDH1A1  | predicted |
| CID9816931  | KDM4E    | predicted |
| CID49773122 | THRB     | predicted |
| CID402      | NT5E     | predicted |
| CID111446   | HSD11B1  | predicted |
| CID15265    | FABP1    | predicted |
| CID5351506  | ABCG2    | predicted |
| CID5245     | PDXK     | predicted |
| CID767      | CA9      | predicted |
| CID370      | GAA      | predicted |
| CID19009    | HPGD     | predicted |
| CID2353     | HSD17B10 | predicted |
| CID1115     | L3MBTL1  | predicted |
| CID4068592  | KDM4E    | predicted |
| CID14896    | RAB9A    | predicted |
| CID6654     | CYP19A1  | predicted |
| CID638011   | ALOX5    | predicted |
| CID521380   | TDP1     | predicted |
| CID608886   | SHBG     | predicted |
| CID520159   | TDP1     | predicted |
| CID10997578 | ALDH1A1  | predicted |
| CID225      | TNF      | predicted |
| CID223578   | ALOX5    | predicted |
| CID10168    | KMT2A    | predicted |
| CID5281607  | CDK4     | predicted |
| CID5255901  | KMT2A    | predicted |
| CID471719   | KDM4E    | predicted |
| CID5282747  | HCAR2    | predicted |
| CID61545    | CTSB     | predicted |
| CID15241817 | CTSB     | predicted |
| CID91520    | PTPN1    | predicted |
| CID11186895 | HTR3A    | predicted |
| CID485077   | CTSV     | predicted |
| CID89047    | MAP2K1   | predicted |
| CID12303797 | ALDH1A1  | predicted |
| CID188516   | TSHR     | predicted |
| CID5091219  | HSD11B1  | predicted |
| CID5320211  | TDP1     | predicted |
| CID2214     | MAPK1    | predicted |
| CID289151   | SHBG     | predicted |
| CID23990    | CNR1     | predicted |
| CID2537     | LMNA     | predicted |
| CID6054     | HTR1B    | predicted |
| CID5280450  | PTGS1    | predicted |
| CID10465    | ALOX5    | predicted |
| CID19725    | SHBG     | predicted |
| CID445638   | FAAH     | predicted |

|              |         |           |
|--------------|---------|-----------|
| CID6989      | BLM     | predicted |
| CID445070    | HTR5A   | predicted |
| CID12313332  | APEX1   | predicted |
| CID379       | THPO    | predicted |
| CID25240035  | CNR1    | predicted |
| CID5280666   | CYP2C9  | predicted |
| CID521215    | CYP19A1 | predicted |
| CID522266    | HSD11B1 | predicted |
| CID136330    | GPBAR1  | predicted |
| CID6782      | TP53    | predicted |
| CID19602     | FAAH    | predicted |
| CID445639    | CTSL    | predicted |
| CID5385553   | POLB    | predicted |
| CID5283316   | TRPA1   | predicted |
| CID10703     | NPC1    | predicted |
| CID61041     | TRPA1   | predicted |
| CID519764    | TDP1    | predicted |
| CID637511    | TDP1    | predicted |
| CID10467     | ALOX5   | predicted |
| CID11197     | ALOX5   | predicted |
| CID23443619  | THRB    | predicted |
| CID5246487   | TP53    | predicted |
| CID5319551   | TDP1    | predicted |
| CID5280961   | CYP2B6  | predicted |
| CID8215      | ALOX5   | predicted |
| CID5281601   | KMT2A   | predicted |
| CID5317346   | NPC1    | predicted |
| CID5315472   | MAPK1   | predicted |
| CID5281767   | MAPK1   | predicted |
| CID14240392  | CYP19A1 | predicted |
| CID5362828   | ALDH1A1 | predicted |
| CID5280379   | AKR1B10 | predicted |
| CID5281984   | AKR1B10 | predicted |
| CID68352     | PTPN1   | predicted |
| CID108011    | NPC1    | predicted |
| CID441643    | NPC1    | predicted |
| CID25034024  | L3MBTL1 | predicted |
| CID100938406 | L3MBTL1 | predicted |
| CID14367555  | SMN1    | predicted |
| CID14633000  | NPC1    | predicted |
| CID5317598   | RAB9A   | predicted |
| CID154699541 | KDM4E   | predicted |
| CID11068834  | SMN1    | predicted |
| CID5316208   | RAB9A   | predicted |
| CID45359845  | SMN1    | predicted |
| CID14543212  | MPEG1   | predicted |
| CID578234    | KMT2A   | predicted |
| CID14191393  | ALDH1A1 | predicted |
| CID387977    | KMT2A   | predicted |
| CID3559861   | CYP19A1 | predicted |
| CID42608153  | RAB9A   | predicted |
| CID131751498 | BACE1   | predicted |
| CID101953463 | PTPN1   | predicted |
| CID13347321  | ALDH1A1 | predicted |
| CID14191392  | SMN1    | predicted |
| CID10039429  | ESR2    | predicted |
| CID13010829  | TDP1    | predicted |
| CID10017580  | MAPK1   | predicted |

|              |          |           |
|--------------|----------|-----------|
| CID13118283  | NPC1     | predicted |
| CID131752799 | MAPK1    | predicted |
| CID14543213  | CYP19A1  | predicted |
| CID14632997  | NPC1     | predicted |
| CID14543199  | NPC1     | predicted |
| CID11795     | SLC10A1  | predicted |
| CID68073     | LMNA     | predicted |
| CID1550936   | ALDH1A1  | predicted |
| CID12314812  | BACE1    | predicted |
| CID14543235  | TDP1     | predicted |
| CID9906039   | TDP1     | predicted |
| CID13347322  | PTPN1    | predicted |
| CID131752986 | KDM4E    | predicted |
| CID57509469  | CYP19A1  | predicted |
| CID75144776  | MAPK1    | predicted |
| CID147446684 | ALDH1A1  | predicted |
| CID536436    | MPEG1    | predicted |
| CID10797750  | SMN1     | predicted |
| CID5312418   | CYP3A4   | predicted |
| CID5282751   | CYP3A4   | predicted |
| CID78178011  | ALOX5    | predicted |
| CID71363803  | MAPT     | predicted |
| CID14107524  | KMT2A    | predicted |
| CID131752987 | TP53     | predicted |
| CID14632996  | SMN1     | predicted |
| CID13967857  | SMN1     | predicted |
| CID519762    | SMN1     | predicted |
| CID14287395  | TDP1     | predicted |
| CID90476927  | CES1     | predicted |
| CID637429    | ALDH1A1  | predicted |
| CID57509470  | NPC1     | predicted |
| CID14632994  | CYP3A4   | predicted |
| CID78171602  | CYP19A1  | predicted |
| CID5469424   | TDP1     | predicted |
| CID14543197  | NPC1     | predicted |
| CID15858385  | ALDH1A1  | predicted |
| CID14633011  | NPC1     | predicted |
| CID10955433  | ABCG2    | predicted |
| CID5324473   | TP53     | predicted |
| CID44629981  | CYP2C9   | predicted |
| CID49777919  | CYP2C9   | predicted |
| CID14367556  | SMN1     | predicted |
| CID626934    | TAAR1    | predicted |
| CID969516    | MAPK1    | predicted |
| CID6115      | HPGD     | predicted |
| CID5324476   | TP53     | predicted |
| CID5322095   | ALDH1A1  | predicted |
| CID101682279 | TDP1     | predicted |
| CID161686    | TNF      | predicted |
| CID323273    | HSP90AA1 | predicted |
| CID23274265  | TP53     | predicted |
| CID5316837   | TDP1     | predicted |
| CID2528      | SMN1     | predicted |
| CID5281614   | LMNA     | predicted |
| CID440735    | CYP19A1  | predicted |
| CID12302281  | SLCO1B3  | predicted |
| CID10051276  | SLCO1B3  | predicted |
| CID12302289  | TNF      | predicted |



|              |          |           |
|--------------|----------|-----------|
| CID12302290  | TNF      | predicted |
| CID11197650  | IL2      | predicted |
| CID5280653   | IL2      | predicted |
| CID11373178  | PTPN1    | predicted |
| CID11373177  | POLB     | predicted |
| CID6440515   | POLB     | predicted |
| CID5318717   | TP53     | predicted |
| CID10004345  | SLCO1B3  | predicted |
| CID9824100   | KMT2A    | predicted |
| CID6324916   | AKR1B1   | predicted |
| CID84298     | AKR1B1   | predicted |
| CID11962122  | NPC1     | predicted |
| CID10842393  | NPC1     | predicted |
| CID5281232   | KMT2A    | predicted |
| CID5281233   | NPC1     | predicted |
| CID12315350  | HSP90AA1 | predicted |
| CID6325021   | AKR1B1   | predicted |
| CID102404034 | NPC1     | predicted |
| CID21769778  | NPC1     | predicted |
| CID5281780   | NPC1     | predicted |
| CID5742692   | NPC1     | predicted |
| CID15480861  | ESR2     | predicted |
| CID442667    | MAPK1    | predicted |
| CID5742694   | NPC1     | predicted |
| CID11372643  | AKR1B1   | predicted |
| CID11418267  | IL2      | predicted |
| CID101675239 | NPC1     | predicted |
| CID261859    | KDM4E    | predicted |
| CID3008859   | RAB9A    | predicted |
| CID101350248 | NPC1     | predicted |
| CID3082301   | AKR1B1   | predicted |
| CID14077819  | MAOA     | predicted |
| CID219100    | TP53     | predicted |
| CID3008861   | SMN1     | predicted |
| CID21594154  | SLCO1B3  | predicted |
| CID5742691   | KDM4E    | predicted |
| CID5742693   | NPC1     | predicted |
| CID10730594  | PLA2G1B  | predicted |
| CID11742062  | ACHE     | predicted |
| CID10423983  | PLA2G1B  | predicted |
| CID101040104 | PPARG    | predicted |
| CID101040105 | BACE1    | predicted |
| CID10092871  | ALOX15   | predicted |
| CID10720420  | PTGS1    | predicted |
| CID10532385  | PTGS1    | predicted |
| CID10788255  | ALOX15   | predicted |
| CID101040112 | SMN1     | predicted |
| CID74223810  | BACE1    | predicted |
| CID101040113 | KMT2A    | predicted |
| CID101040110 | MAOA     | predicted |
| CID101040111 | TDP1     | predicted |
| CID101040114 | LMNA     | predicted |
| CID101040115 | KDM4E    | predicted |
| CID219592    | TDP1     | predicted |
| CID44257393  | RAB9A    | predicted |
| CID1738124   | TNF      | predicted |
| CID101243871 | IL2      | predicted |
| CID16592     | HPGD     | predicted |

|              |          |           |
|--------------|----------|-----------|
| CID5281675   | POLB     | predicted |
| CID5320582   | TNF      | predicted |
| CID3008860   | PRKCD    | predicted |
| CID442433    | AKR1B1   | predicted |
| CID11948668  | IL2      | predicted |
| CID3008858   | RAB9A    | predicted |
| CID14378605  | IL2      | predicted |
| CID73981590  | NPC1     | predicted |
| CID10787     | MAPT     | predicted |
| CID5317532   | MAPT     | predicted |
| CID87730829  | CA12     | predicted |
| CID14523449  | CYP2C19  | predicted |
| CID138753594 | NPC1     | predicted |
| CID610933    | MAPK1    | predicted |
| CID70859637  | KMT2A    | predicted |
| CID3004155   | HSD11B1  | predicted |
| CID53463561  | MAPT     | predicted |
| CID13914606  | RAB9A    | predicted |
| CID76551288  | IL2      | predicted |
| CID5281152   | CYP3A4   | predicted |
| CID24814     | HRH4     | predicted |
| CID100058    | AKR1B1   | predicted |
| CID5316844   | MAPK1    | predicted |
| CID10970376  | NPC1     | predicted |
| CID9884033   | RAB9A    | predicted |
| CID10741     | KDM4E    | predicted |
| CID10715291  | TP53     | predicted |
| CID44195972  | KMT2A    | predicted |
| CID6122937   | CTSB     | predicted |
| CID138714873 | NPC1     | predicted |
| CID4490286   | AKR1B1   | predicted |
| CID387101196 | SLCO1B1  | predicted |
| CID45783213  | HSP90AA1 | predicted |
| CID45783214  | HSP90AA1 | predicted |
| CID1201518   | NPC1     | predicted |
| CID12445022  | NPC1     | predicted |
| CID8417      | KDM4E    | predicted |
| CID5280460   | TDP1     | predicted |
| CID5316647   | KMT2A    | predicted |
| CID5281792   | KMT2A    | predicted |
| CID196216    | RAB9A    | predicted |
| CID519954    | ACHE     | predicted |
| CID5322049   | ABCG2    | predicted |
| CID5322048   | KMT2A    | predicted |
| CID22559443  | GPBAR1   | predicted |
| CID5281663   | HTR2A    | predicted |
| CID296191    | TNF      | predicted |
| CID68252     | ACHE     | predicted |
| CID5372954   | ALDH1A1  | predicted |
| CID1549106   | TP53     | predicted |
| CID145627453 | SLCO1B3  | predicted |
| CID7424      | ESR2     | predicted |
| CID1309      | TSHR     | predicted |
| CID5321869   | MAPK1    | predicted |
| CID5321200   | NPC1     | predicted |
| CID4483044   | HSD11B1  | predicted |
| CID49824629  | SMN1     | predicted |
| CID5321859   | CA12     | predicted |

|             |          |           |
|-------------|----------|-----------|
| CID3415719  | TDP1     | predicted |
| CID5320471  | KDM4E    | predicted |
| CID5321865  | BACE1    | predicted |
| CID71307292 | TDP1     | predicted |
| CID21155632 | NPC1     | predicted |
| CID547509   | CHRFAM7A | predicted |
| CID5322076  | HPGD     | predicted |
| CID124211   | NPC1     | predicted |
| CID14135334 | ABCG2    | predicted |
| CID5321205  | HPGD     | predicted |
| CID4961358  | TSHR     | predicted |
| CID20763017 | NPC1     | predicted |
| CID296119   | TNF      | predicted |
| CID445858   | ESR2     | predicted |
| CID22376357 | TSHR     | predicted |
| CID119034   | TNF      | predicted |
| CID6552009  | NPC1     | predicted |
| CID5284500  | LMNA     | predicted |
| CID12309393 | CYP19A1  | predicted |
| CID101761   | SLCO1B3  | predicted |
| CID6973640  | NPC1     | predicted |
| CID6321405  | NPC1     | predicted |
| CID1567554  | TDP1     | predicted |
| CID4220788  | SMN1     | predicted |
| CID20163303 | TP53     | predicted |
| CID455809   | NPC1     | predicted |
| CID3082025  | ALOX5    | predicted |
| CID6365403  | HPGD     | predicted |
| CID73648    | RAB9A    | predicted |
| CID8205     | ALDH1A1  | predicted |
| CID5320193  | FAAH     | predicted |
| CID338      | MB       | predicted |
| CID11095    | CYP19A1  | predicted |
| CID5320384  | CYP19A1  | predicted |
| CID22311    | TDP1     | predicted |
| CID26049    | XBP1     | predicted |
| CID5282745  | MAPT     | predicted |
| CID6438157  | HCAR2    | predicted |
| CID274352   | CYP3A4   | predicted |
| CID5316834  | MAPK1    | predicted |
| CID5320475  | KMT2A    | predicted |
| CID5316833  | ABCB1    | predicted |
| CID124869   | MAPK1    | predicted |
| CID9816931  | NPC1     | predicted |
| CID49773122 | ALDH1A1  | predicted |
| CID402      | HPGD     | predicted |
| CID111446   | RAB9A    | predicted |
| CID15265    | PPARG    | predicted |
| CID5351506  | POLB     | predicted |
| CID5245     | CYP2C19  | predicted |
| CID767      | ALDH1A1  | predicted |
| CID370      | THPO     | predicted |
| CID19009    | TP53     | predicted |
| CID2353     | TP53     | predicted |
| CID1115     | NPC1     | predicted |
| CID4068592  | GABRR2   | predicted |
| CID14896    | SMN1     | predicted |
| CID6654     | TNF      | predicted |

|             |         |           |
|-------------|---------|-----------|
| CID638011   | TDP1    | predicted |
| CID521380   | SMN1    | predicted |
| CID608886   | SLCO1B3 | predicted |
| CID520159   | SMN1    | predicted |
| CID10997578 | CNR2    | predicted |
| CID225      | CYP3A4  | predicted |
| CID223578   | CYP19A1 | predicted |
| CID10168    | LMNA    | predicted |
| CID5281607  | RECQL   | predicted |
| CID5255901  | ALDH1A1 | predicted |
| CID471719   | TDP1    | predicted |
| CID5282747  | TDP1    | predicted |
| CID61545    | GSTK1   | predicted |
| CID15241817 | GSTK1   | predicted |
| CID91520    | L3MBTL1 | predicted |
| CID11186895 | DOP2R   | predicted |
| CID485077   | TSHR    | predicted |
| CID89047    | ACHE    | predicted |
| CID12303797 | NPC1    | predicted |
| CID188516   | KMT2A   | predicted |
| CID5091219  | TDP1    | predicted |
| CID5320211  | TSHR    | predicted |
| CID2214     | MAOA    | predicted |
| CID289151   | ALDH1A1 | predicted |
| CID23990    | ACHE    | predicted |
| CID2537     | NPC1    | predicted |
| CID6054     | HRH2    | predicted |
| CID5280450  | MAPT    | predicted |
| CID10465    | TRPV1   | predicted |
| CID19725    | NPC1    | predicted |
| CID445638   | SLCO1B3 | predicted |
| CID6989     | TERT    | predicted |
| CID445070   | CA13    | predicted |
| CID12313332 | SMN1    | predicted |
| CID379      | TDP1    | predicted |
| CID25240035 | CYP3A4  | predicted |
| CID5280666  | AR      | predicted |
| CID521215   | CNR2    | predicted |
| CID522266   | SMN1    | predicted |
| CID136330   | KMT2A   | predicted |
| CID6782     | RAB9A   | predicted |
| CID19602    | MAPK1   | predicted |
| CID445639   | CTSB    | predicted |
| CID5385553  | SMN1    | predicted |
| CID5283316  | RAB9A   | predicted |
| CID10703    | MAOA    | predicted |
| CID61041    | CYP19A1 | predicted |
| CID519764   | PPARG   | predicted |
| CID637511   | CTSB    | predicted |
| CID10467    | TRPV1   | predicted |
| CID11197    | TRPV1   | predicted |
| CID23443619 | POLB    | predicted |
| CID5246487  | HIF1A   | predicted |
| CID5319551  | SMN1    | predicted |
| CID5280961  | CYP2D6  | predicted |
| CID8215     | TRPV1   | predicted |
| CID5281601  | ALDH1A1 | predicted |
| CID5317346  | KMT2A   | predicted |

|              |          |           |
|--------------|----------|-----------|
| CID5315472   | ABCG2    | predicted |
| CID5281767   | THPO     | predicted |
| CID14240392  | HSD11B1  | predicted |
| CID5362828   | TDP1     | predicted |
| CID5280379   | NPC1     | predicted |
| CID5281984   | NPC1     | predicted |
| CID68352     | CA1      | predicted |
| CID108011    | L3MBTL1  | predicted |
| CID441643    | L3MBTL1  | predicted |
| CID25034024  | IL2      | predicted |
| CID100938406 | IL2      | predicted |
| CID14367555  | TDP1     | predicted |
| CID14633000  | HSD11B1  | predicted |
| CID5317598   | ABCG2    | predicted |
| CID154699541 | ALOX15   | predicted |
| CID11068834  | NPC1     | predicted |
| CID5316208   | NPC1     | predicted |
| CID45359845  | MAPK1    | predicted |
| CID14543212  | POLB     | predicted |
| CID578234    | HSD11B1  | predicted |
| CID14191393  | NFKB1    | predicted |
| CID387977    | ALDH1A1  | predicted |
| CID3559861   | HSD11B1  | predicted |
| CID42608153  | GPBAR1   | predicted |
| CID131751498 | KMT2A    | predicted |
| CID101953463 | KDM4E    | predicted |
| CID13347321  | RAB9A    | predicted |
| CID14191392  | TDP1     | predicted |
| CID10039429  | ALDH1A1  | predicted |
| CID13010829  | ALDH1A1  | predicted |
| CID10017580  | ALDH1A1  | predicted |
| CID13118283  | SMN1     | predicted |
| CID131752799 | ABCG2    | predicted |
| CID14543213  | POLB     | predicted |
| CID14632997  | HSD11B1  | predicted |
| CID14543199  | MPEG1    | predicted |
| CID11795     | TAAR1    | predicted |
| CID68073     | KDM4E    | predicted |
| CID1550936   | CA2      | predicted |
| CID12314812  | ALDH1A1  | predicted |
| CID14543235  | HSD11B1  | predicted |
| CID9906039   | HSD17B10 | predicted |
| CID13347322  | TDP1     | predicted |
| CID131752986 | CYP19A1  | predicted |
| CID57509469  | HTT      | predicted |
| CID75144776  | ALDH1A1  | predicted |
| CID147446684 | HTT      | predicted |
| CID536436    | ALDH1A1  | predicted |
| CID10797750  | RAD51    | predicted |
| CID5312418   | CNR1     | predicted |
| CID5282751   | CNR1     | predicted |
| CID78178011  | CYP19A1  | predicted |
| CID71363803  | PRKCA    | predicted |
| CID14107524  | PTPN1    | predicted |
| CID131752987 | KMT2A    | predicted |
| CID14632996  | ALOX15   | predicted |
| CID13967857  | RAB9A    | predicted |
| CID519762    | HSD11B1  | predicted |

|              |          |           |
|--------------|----------|-----------|
| CID14287395  | ALOX5    | predicted |
| CID90476927  | TYR      | predicted |
| CID637429    | CYP19A1  | predicted |
| CID57509470  | KMT2A    | predicted |
| CID14632994  | ALOX5    | predicted |
| CID78171602  | TP53     | predicted |
| CID5469424   | MAPK1    | predicted |
| CID14543197  | MPEG1    | predicted |
| CID15858385  | KDM4E    | predicted |
| CID14633011  | HSD11B1  | predicted |
| CID10955433  | CNR2     | predicted |
| CID5324473   | NPC1     | predicted |
| CID44629981  | TDP1     | predicted |
| CID49777919  | HSD17B10 | predicted |
| CID14367556  | TDP1     | predicted |
| CID626934    | NPC1     | predicted |
| CID969516    | THPO     | predicted |
| CID6115      | TAAR1    | predicted |
| CID5324476   | KMT2A    | predicted |
| CID5322095   | TDP1     | predicted |
| CID101682279 | TNF      | predicted |
| CID161686    | AKR1B10  | predicted |
| CID323273    | NPC1     | predicted |
| CID23274265  | NPC1     | predicted |
| CID5316837   | ACHE     | predicted |
| CID2528      | CYP3A4   | predicted |
| CID5281614   | POLB     | predicted |
| CID440735    | PRKDC    | predicted |
| CID12302281  | AKR1B10  | predicted |
| CID10051276  | SLCO1B1  | predicted |
| CID12302289  | CYP19A1  | predicted |
| CID12302290  | CYP19A1  | predicted |
| CID11197650  | POLB     | predicted |
| CID5280653   | POLB     | predicted |
| CID11373178  | KMT2A    | predicted |
| CID11373177  | ALDH1A1  | predicted |
| CID6440515   | ALDH1A1  | predicted |
| CID5318717   | TDP1     | predicted |
| CID10004345  | AKR1B10  | predicted |
| CID9824100   | AKR1B1   | predicted |
| CID6324916   | ALDH1A1  | predicted |
| CID84298     | IL2      | predicted |
| CID11962122  | KMT2A    | predicted |
| CID10842393  | KMT2A    | predicted |
| CID5281232   | CA1      | predicted |
| CID5281233   | L3MBTL1  | predicted |
| CID12315350  | NPC1     | predicted |
| CID6325021   | HSP90AA1 | predicted |
| CID102404034 | KMT2A    | predicted |
| CID21769778  | KMT2A    | predicted |
| CID5281780   | KMT2A    | predicted |
| CID5742692   | KDM4E    | predicted |
| CID15480861  | CYP2A6   | predicted |
| CID442667    | TSHR     | predicted |
| CID5742694   | KDM4E    | predicted |
| CID11372643  | HSP90AA1 | predicted |
| CID11418267  | AKR1B1   | predicted |
| CID101675239 | CYP19A1  | predicted |

|              |          |           |
|--------------|----------|-----------|
| CID261859    | LMNA     | predicted |
| CID3008859   | SMN1     | predicted |
| CID101350248 | AKR1B1   | predicted |
| CID3082301   | HSP90AA1 | predicted |
| CID14077819  | ALDH1A1  | predicted |
| CID219100    | TDP1     | predicted |
| CID3008861   | AKR1B10  | predicted |
| CID21594154  | AKR1B10  | predicted |
| CID5742691   | CA13     | predicted |
| CID5742693   | KDM4E    | predicted |
| CID10730594  | ALDH1A1  | predicted |
| CID11742062  | ESR2     | predicted |
| CID10423983  | CYP2A6   | predicted |
| CID101040104 | ABCG2    | predicted |
| CID101040105 | PTGES    | predicted |
| CID10092871  | MAPK1    | predicted |
| CID10720420  | MAPK1    | predicted |
| CID10532385  | ESR2     | predicted |
| CID10788255  | LMNA     | predicted |
| CID101040112 | BACE1    | predicted |
| CID74223810  | SMN1     | predicted |
| CID101040113 | TDP1     | predicted |
| CID101040110 | NPC1     | predicted |
| CID101040111 | ALOX15   | predicted |
| CID101040114 | PTGS1    | predicted |
| CID101040115 | SMN1     | predicted |
| CID219592    | MAPK1    | predicted |
| CID44257393  | ALDH1A1  | predicted |
| CID1738124   | ALOX5    | predicted |
| CID101243871 | AKR1B1   | predicted |
| CID16592     | NOS3     | predicted |
| CID5281675   | AKR1B1   | predicted |
| CID5320582   | AKR1B1   | predicted |
| CID3008860   | XBP1     | predicted |
| CID442433    | HSP90AA1 | predicted |
| CID11948668  | AKR1B1   | predicted |
| CID3008858   | SMN1     | predicted |
| CID14378605  | AKR1B1   | predicted |
| CID73981590  | AKR1B1   | predicted |
| CID10787     | HSD17B10 | predicted |
| CID5317532   | TSHR     | predicted |
| CID87730829  | CA1      | predicted |
| CID14523449  | ALDH1A1  | predicted |
| CID138753594 | L3MBTL1  | predicted |
| CID610933    | LMNA     | predicted |
| CID70859637  | ACHE     | predicted |
| CID3004155   | TDP1     | predicted |
| CID53463561  | CHRFAM7A | predicted |
| CID13914606  | SMN1     | predicted |
| CID76551288  | HSD11B1  | predicted |
| CID5281152   | DPP4     | predicted |
| CID24814     | NPSR1    | predicted |
| CID100058    | IL2      | predicted |
| CID5316844   | TDP1     | predicted |
| CID10970376  | ACHE     | predicted |
| CID9884033   | ACHE     | predicted |
| CID10741     | NPC1     | predicted |
| CID10715291  | CA1      | predicted |

|              |         |           |
|--------------|---------|-----------|
| CID44195972  | MAOA    | predicted |
| CID6122937   | FNTA    | predicted |
| CID138714873 | L3MBTL1 | predicted |
| CID4490286   | ALDH1A1 | predicted |
| CID387101196 | CA1     | predicted |
| CID45783213  | IL2     | predicted |
| CID45783214  | IL2     | predicted |
| CID1201518   | XBP1    | predicted |
| CID12445022  | RAB9A   | predicted |
| CID8417      | TP53    | predicted |
| CID5280460   | CA6     | predicted |
| CID5316647   | NPC1    | predicted |
| CID5281792   | GAA     | predicted |
| CID196216    | GPBAR1  | predicted |
| CID519954    | MAPK1   | predicted |
| CID5322049   | PPARG   | predicted |
| CID5322048   | TDP1    | predicted |
| CID22559443  | TP53    | predicted |
| CID5281663   | DYRK1B  | predicted |
| CID296191    | TDP1    | predicted |
| CID68252     | CYP19A1 | predicted |
| CID5372954   | CA2     | predicted |
| CID1549106   | ALDH1A1 | predicted |
| CID145627453 | AKR1B10 | predicted |
| CID7424      | LMNA    | predicted |
| CID1309      | ACHE    | predicted |
| CID5321869   | ACHE    | predicted |
| CID5321200   | PTPN1   | predicted |
| CID4483044   | TDP1    | predicted |
| CID49824629  | CA1     | predicted |
| CID5321859   | ALOX15  | predicted |
| CID3415719   | USP2    | predicted |
| CID5320471   | ALDH1A1 | predicted |
| CID5321865   | MAPK1   | predicted |
| CID71307292  | NPC1    | predicted |
| CID21155632  | TDP1    | predicted |
| CID547509    | ALDH1A1 | predicted |
| CID5322076   | BACE1   | predicted |
| CID124211    | TDP1    | predicted |
| CID14135334  | POLB    | predicted |
| CID5321205   | CA12    | predicted |
| CID4961358   | POLB    | predicted |
| CID20763017  | SLCO1B3 | predicted |
| CID296119    | SMN1    | predicted |
| CID445858    | HPGD    | predicted |
| CID22376357  | AKR1B1  | predicted |
| CID119034    | TDP1    | predicted |
| CID6552009   | XBP1    | predicted |
| CID5284500   | NPC1    | predicted |
| CID12309393  | RAB9A   | predicted |
| CID101761    | AKR1B10 | predicted |
| CID6973640   | XBP1    | predicted |
| CID6321405   | XBP1    | predicted |
| CID1567554   | CNR2    | predicted |
| CID4220788   | RAB9A   | predicted |
| CID20163303  | SMN1    | predicted |
| CID455809    | BACE1   | predicted |
| CID3082025   | MAPK1   | predicted |



|             |         |           |
|-------------|---------|-----------|
| CID6365403  | LMNA    | predicted |
| CID73648    | NPC1    | predicted |
| CID8205     | ACHE    | predicted |
| CID5320193  | TRPV1   | predicted |
| CID338      | HSD17B3 | predicted |
| CID11095    | PRKDC   | predicted |
| CID5320384  | ESR1    | predicted |
| CID22311    | ALOX5   | predicted |
| CID26049    | RAB9A   | predicted |
| CID5282745  | TRPV1   | predicted |
| CID6438157  | TDP1    | predicted |
| CID274352   | CA12    | predicted |
| CID5316834  | KDM4E   | predicted |
| CID5320475  | ABCB1   | predicted |
| CID5316833  | TDP1    | predicted |
| CID124869   | PTPN1   | predicted |
| CID9816931  | MAPK1   | predicted |
| CID49773122 | AHCY    | predicted |
| CID402      | LMNA    | predicted |
| CID111446   | NPC1    | predicted |
| CID15265    | MAPT    | predicted |
| CID5351506  | L3MBTL1 | predicted |
| CID5245     | HTR3A   | predicted |
| CID767      | PTPN1   | predicted |
| CID370      | MMP7    | predicted |
| CID19009    | ALDH1A1 | predicted |
| CID2353     | CASP9   | predicted |
| CID1115     | POLB    | predicted |
| CID4068592  | NMUR2   | predicted |
| CID14896    | CYP19A1 | predicted |
| CID6654     | PTPN2   | predicted |
| CID638011   | RAB9A   | predicted |
| CID521380   | TP53    | predicted |
| CID608886   | AKR1B10 | predicted |
| CID520159   | MPEG1   | predicted |
| CID10997578 | CNR1    | predicted |
| CID225      | RAB9A   | predicted |
| CID223578   | HSD11B1 | predicted |
| CID10168    | CYP2C19 | predicted |
| CID5281607  | MAPK10  | predicted |
| CID5255901  | TP53    | predicted |
| CID471719   | KMT2A   | predicted |
| CID5282747  | CNR2    | predicted |
| CID61545    | LMNA    | predicted |
| CID15241817 | LMNA    | predicted |
| CID91520    | TSHR    | predicted |
| CID11186895 | HTR5A   | predicted |
| CID485077   | ALOX5   | predicted |
| CID89047    | MAPK1   | predicted |
| CID12303797 | L3MBTL1 | predicted |
| CID188516   | LMNA    | predicted |
| CID5091219  | CYP19A1 | predicted |
| CID5320211  | MAPK1   | predicted |
| CID2214     | KMT2A   | predicted |
| CID289151   | CYP19A1 | predicted |
| CID23990    | ALOX5   | predicted |
| CID2537     | SMN1    | predicted |
| CID6054     | LMNA    | predicted |

|              |          |           |
|--------------|----------|-----------|
| CID5280450   | CYP3A4   | predicted |
| CID10465     | MAPT     | predicted |
| CID19725     | CYP19A1  | predicted |
| CID445638    | TERT     | predicted |
| CID6989      | TRPV1    | predicted |
| CID445070    | RECQL    | predicted |
| CID12313332  | KMT2A    | predicted |
| CID379       | RAB9A    | predicted |
| CID25240035  | PTPN1    | predicted |
| CID5280666   | MAPK10   | predicted |
| CID521215    | KMT2A    | predicted |
| CID522266    | ACHE     | predicted |
| CID136330    | NPC1     | predicted |
| CID6782      | NPC1     | predicted |
| CID19602     | CYP3A4   | predicted |
| CID445639    | SLCO1B1  | predicted |
| CID5385553   | APEX1    | predicted |
| CID5283316   | TP53     | predicted |
| CID10703     | RAB9A    | predicted |
| CID61041     | SMN1     | predicted |
| CID519764    | CNR2     | predicted |
| CID637511    | HIF1A    | predicted |
| CID10467     | MAPT     | predicted |
| CID11197     | MAPT     | predicted |
| CID23443619  | PMP22    | predicted |
| CID5246487   | CA4      | predicted |
| CID5319551   | CYP19A1  | predicted |
| CID5280961   | HPGD     | predicted |
| CID8215      | MAPT     | predicted |
| CID5281601   | TP53     | predicted |
| CID5317346   | TP53     | predicted |
| CID5315472   | RAB9A    | predicted |
| CID5281767   | CYP2D6   | predicted |
| CID14240392  | KMT2A    | predicted |
| CID5362828   | RAB9A    | predicted |
| CID5280379   | TDP1     | predicted |
| CID5281984   | SHBG     | predicted |
| CID68352     | TP53     | predicted |
| CID108011    | POLB     | predicted |
| CID441643    | PTPN1    | predicted |
| CID25034024  | PTPN1    | predicted |
| CID100938406 | ALDH1A1  | predicted |
| CID14367555  | ALOX15   | predicted |
| CID14633000  | ALDH1A1  | predicted |
| CID5317598   | PPARG    | predicted |
| CID154699541 | NPC1     | predicted |
| CID11068834  | ALOX15   | predicted |
| CID5316208   | ALDH1A1  | predicted |
| CID45359845  | AKR1B10  | predicted |
| CID14543212  | SMN1     | predicted |
| CID578234    | HSP90AA1 | predicted |
| CID14191393  | HTT      | predicted |
| CID387977    | TP53     | predicted |
| CID3559861   | KMT2A    | predicted |
| CID42608153  | SMN1     | predicted |
| CID131751498 | ALDH1A1  | predicted |
| CID101953463 | SMN1     | predicted |
| CID13347321  | PPARG    | predicted |

|              |          |           |
|--------------|----------|-----------|
| CID14191392  | KMT2A    | predicted |
| CID10039429  | NPC1     | predicted |
| CID13010829  | NPC1     | predicted |
| CID10017580  | NPC1     | predicted |
| CID13118283  | CYP2A6   | predicted |
| CID131752799 | ALOX15   | predicted |
| CID14543213  | SMN1     | predicted |
| CID14632997  | ALDH1A1  | predicted |
| CID14543199  | ALDH1A1  | predicted |
| CID11795     | IDO1     | predicted |
| CID68073     | ALOX15   | predicted |
| CID1550936   | NPC1     | predicted |
| CID12314812  | ACHE     | predicted |
| CID14543235  | ALOX5    | predicted |
| CID9906039   | PTPN1    | predicted |
| CID13347322  | KMT2A    | predicted |
| CID131752986 | PTPN1    | predicted |
| CID57509469  | ALDH1A1  | predicted |
| CID75144776  | TP53     | predicted |
| CID147446684 | HSP90AA1 | predicted |
| CID536436    | KMT2A    | predicted |
| CID10797750  | ACHE     | predicted |
| CID5312418   | PPARA    | predicted |
| CID5282751   | PPARA    | predicted |
| CID78178011  | SMN1     | predicted |
| CID71363803  | CYP3A4   | predicted |
| CID14107524  | ABCG2    | predicted |
| CID131752987 | ACHE     | predicted |
| CID14632996  | MPEG1    | predicted |
| CID13967857  | ACHE     | predicted |
| CID519762    | RAB9A    | predicted |
| CID14287395  | KMT2A    | predicted |
| CID90476927  | LMNA     | predicted |
| CID637429    | TP53     | predicted |
| CID57509470  | MPEG1    | predicted |
| CID14632994  | PRKCA    | predicted |
| CID78171602  | NPC1     | predicted |
| CID5469424   | RAB9A    | predicted |
| CID14543197  | ALDH1A1  | predicted |
| CID15858385  | ABCG2    | predicted |
| CID14633011  | KMT2A    | predicted |
| CID10955433  | ALOX5    | predicted |
| CID5324473   | TDP1     | predicted |
| CID44629981  | HSD17B10 | predicted |
| CID49777919  | ACHE     | predicted |
| CID14367556  | ALOX15   | predicted |
| CID626934    | MAOA     | predicted |
| CID969516    | CYP2D6   | predicted |
| CID6115      | HSD17B10 | predicted |
| CID5324476   | KDM4E    | predicted |
| CID5322095   | TRPV1    | predicted |
| CID101682279 | CYP19A1  | predicted |
| CID161686    | NPC1     | predicted |
| CID323273    | L3MBTL1  | predicted |
| CID23274265  | ACHE     | predicted |
| CID5316837   | KMT2A    | predicted |
| CID2528      | TSHR     | predicted |
| CID5281614   | CYP2C19  | predicted |

|              |         |           |
|--------------|---------|-----------|
| CID440735    | CYP2C19 | predicted |
| CID12302281  | SLCO1B1 | predicted |
| CID10051276  | CYP19A1 | predicted |
| CID12302289  | SHBG    | predicted |
| CID12302290  | SHBG    | predicted |
| CID11197650  | L3MBTL1 | predicted |
| CID5280653   | L3MBTL1 | predicted |
| CID11373178  | POLB    | predicted |
| CID11373177  | KMT2A   | predicted |
| CID6440515   | KMT2A   | predicted |
| CID5318717   | ALDH1A1 | predicted |
| CID10004345  | SLCO1B1 | predicted |
| CID9824100   | ALDH1A1 | predicted |
| CID6324916   | IL2     | predicted |
| CID84298     | ALDH1A1 | predicted |
| CID11962122  | CYP19A1 | predicted |
| CID10842393  | AKR1B10 | predicted |
| CID5281232   | RAB9A   | predicted |
| CID5281233   | POLB    | predicted |
| CID12315350  | L3MBTL1 | predicted |
| CID6325021   | ALDH1A1 | predicted |
| CID102404034 | CYP19A1 | predicted |
| CID21769778  | CYP19A1 | predicted |
| CID5281780   | TP53    | predicted |
| CID5742692   | TDP1    | predicted |
| CID15480861  | EED     | predicted |
| CID442667    | LMNA    | predicted |
| CID5742694   | TDP1    | predicted |
| CID11372643  | ALDH1A1 | predicted |
| CID11418267  | ALDH1A1 | predicted |
| CID101675239 | AKR1B10 | predicted |
| CID261859    | ALOX15  | predicted |
| CID3008859   | TNF     | predicted |
| CID101350248 | TNF     | predicted |
| CID3082301   | ALDH1A1 | predicted |
| CID14077819  | TSHR    | predicted |
| CID219100    | ACHE    | predicted |
| CID3008861   | SHBG    | predicted |
| CID21594154  | SLCO1B1 | predicted |
| CID5742691   | TDP1    | predicted |
| CID5742693   | TDP1    | predicted |
| CID10730594  | LMNA    | predicted |
| CID11742062  | EED     | predicted |
| CID10423983  | ALDH1A1 | predicted |
| CID101040104 | ACHE    | predicted |
| CID101040105 | ALOX15  | predicted |
| CID10092871  | ACHE    | predicted |
| CID10720420  | PLA2G1B | predicted |
| CID10532385  | LMNA    | predicted |
| CID10788255  | CYP19A1 | predicted |
| CID101040112 | KMT2A   | predicted |
| CID74223810  | KMT2A   | predicted |
| CID101040113 | SMN1    | predicted |
| CID101040110 | PPARG   | predicted |
| CID101040111 | MAOA    | predicted |
| CID101040114 | ALDH1A1 | predicted |
| CID101040115 | ACHE    | predicted |
| CID219592    | ALDH1A1 | predicted |

|              |         |           |
|--------------|---------|-----------|
| CID44257393  | SMN1    | predicted |
| CID1738124   | MPEG1   | predicted |
| CID101243871 | ALDH1A1 | predicted |
| CID16592     | CTSL    | predicted |
| CID5281675   | KDM4E   | predicted |
| CID5320582   | GPBAR1  | predicted |
| CID3008860   | SMN1    | predicted |
| CID442433    | ALDH1A1 | predicted |
| CID11948668  | GPBAR1  | predicted |
| CID3008858   | TNF     | predicted |
| CID14378605  | GPBAR1  | predicted |
| CID73981590  | TNF     | predicted |
| CID10787     | ESR1    | predicted |
| CID5317532   | ALDH1A1 | predicted |
| CID87730829  | ATM     | predicted |
| CID14523449  | KMT2A   | predicted |
| CID138753594 | POLB    | predicted |
| CID610933    | ACHE    | predicted |
| CID70859637  | ALDH1A1 | predicted |
| CID3004155   | HTT     | predicted |
| CID53463561  | HTR2C   | predicted |
| CID13914606  | TNF     | predicted |
| CID76551288  | CYP19A1 | predicted |
| CID5281152   | PPARA   | predicted |
| CID24814     | SLC37A4 | predicted |
| CID100058    | L3MBTL1 | predicted |
| CID5316844   | KDM4E   | predicted |
| CID10970376  | TDP1    | predicted |
| CID9884033   | ALDH1A1 | predicted |
| CID10741     | ACHE    | predicted |
| CID10715291  | CA12    | predicted |
| CID44195972  | CYP19A1 | predicted |
| CID6122937   | IL2     | predicted |
| CID138714873 | POLB    | predicted |
| CID4490286   | KMT2A   | predicted |
| CID387101196 | CA2     | predicted |
| CID45783213  | KMT2A   | predicted |
| CID45783214  | KMT2A   | predicted |
| CID1201518   | TNF     | predicted |
| CID12445022  | TDP1    | predicted |
| CID8417      | CA9     | predicted |
| CID5280460   | APEX1   | predicted |
| CID5316647   | TP53    | predicted |
| CID5281792   | POLB    | predicted |
| CID196216    | TDP1    | predicted |
| CID519954    | KMT2A   | predicted |
| CID5322049   | MAPK1   | predicted |
| CID5322048   | MAPK1   | predicted |
| CID22559443  | ACHE    | predicted |
| CID5281663   | DYRK2   | predicted |
| CID296191    | SHBG    | predicted |
| CID68252     | RAB9A   | predicted |
| CID5372954   | CA9     | predicted |
| CID1549106   | KMT2A   | predicted |
| CID145627453 | SLCO1B1 | predicted |
| CID7424      | HPGD    | predicted |
| CID1309      | ALDH1A1 | predicted |
| CID5321869   | TP53    | predicted |

|             |          |           |
|-------------|----------|-----------|
| CID5321200  | KMT2A    | predicted |
| CID4483044  | NPC1     | predicted |
| CID49824629 | APEX1    | predicted |
| CID5321859  | NPC1     | predicted |
| CID3415719  | NPC1     | predicted |
| CID5320471  | BACE1    | predicted |
| CID5321865  | HPGD     | predicted |
| CID71307292 | PTPN1    | predicted |
| CID21155632 | KMT2A    | predicted |
| CID547509   | PTPN1    | predicted |
| CID5322076  | CA12     | predicted |
| CID124211   | CTSV     | predicted |
| CID14135334 | IL2      | predicted |
| CID5321205  | CYP19A1  | predicted |
| CID4961358  | APEX1    | predicted |
| CID20763017 | SLCO1B1  | predicted |
| CID296119   | HSP90AA1 | predicted |
| CID445858   | HRH4     | predicted |
| CID22376357 | NPSR1    | predicted |
| CID119034   | SHBG     | predicted |
| CID6552009  | TNF      | predicted |
| CID5284500  | SMN1     | predicted |
| CID12309393 | ALDH1A1  | predicted |
| CID101761   | SLCO1B1  | predicted |
| CID6973640  | TNF      | predicted |
| CID6321405  | TNF      | predicted |
| CID1567554  | CA12     | predicted |
| CID4220788  | ALDH1A1  | predicted |
| CID20163303 | KMT2A    | predicted |
| CID455809   | ALDH1A1  | predicted |
| CID3082025  | SMN1     | predicted |
| CID6365403  | HSD17B10 | predicted |
| CID73648    | TDP1     | predicted |
| CID8205     | PPARG    | predicted |
| CID5320193  | PPARG    | predicted |
| CID338      | GLA      | predicted |
| CID11095    | CYP2C19  | predicted |
| CID5320384  | LMNA     | predicted |
| CID22311    | ALOX15   | predicted |
| CID26049    | CYP19A1  | predicted |
| CID5282745  | ALOX5    | predicted |
| CID6438157  | CNR2     | predicted |
| CID274352   | CA2      | predicted |
| CID5316834  | CA9      | predicted |
| CID5320475  | MAPK1    | predicted |
| CID5316833  | KDM4E    | predicted |
| CID124869   | TDP1     | predicted |
| CID9816931  | CYP2C19  | predicted |
| CID49773122 | MAPK1    | predicted |
| CID402      | HSD17B10 | predicted |
| CID111446   | SMN1     | predicted |
| CID15265    | VDR      | predicted |
| CID5351506  | TSHR     | predicted |
| CID5245     | CYP2A13  | predicted |
| CID767      | TP53     | predicted |
| CID370      | NFKB1    | predicted |
| CID19009    | BLM      | predicted |
| CID2353     | CYP2C9   | predicted |

|             |         |           |
|-------------|---------|-----------|
| CID1115     | TSHR    | predicted |
| CID4068592  | GABRR1  | predicted |
| CID14896    | PTPN2   | predicted |
| CID6654     | ACHE    | predicted |
| CID638011   | ABCG2   | predicted |
| CID521380   | ALOX15  | predicted |
| CID608886   | SLCO1B1 | predicted |
| CID520159   | ACHE    | predicted |
| CID10997578 | SMN1    | predicted |
| CID225      | SMN1    | predicted |
| CID223578   | RAB9A   | predicted |
| CID10168    | POLB    | predicted |
| CID5281607  | CA6     | predicted |
| CID5255901  | ALOX15  | predicted |
| CID471719   | LMNA    | predicted |
| CID5282747  | PTPN1   | predicted |
| CID61545    | HTT     | predicted |
| CID15241817 | HTT     | predicted |
| CID91520    | TNF     | predicted |
| CID11186895 | LMNA    | predicted |
| CID485077   | KMT2A   | predicted |
| CID89047    | TDP1    | predicted |
| CID12303797 | TP53    | predicted |
| CID188516   | NPC1    | predicted |
| CID5091219  | TP53    | predicted |
| CID5320211  | NPC1    | predicted |
| CID2214     | ALOX15  | predicted |
| CID289151   | NR1H3   | predicted |
| CID23990    | SMN1    | predicted |
| CID2537     | USP2    | predicted |
| CID6054     | MPO     | predicted |
| CID5280450  | FAAH    | predicted |
| CID10465    | PTPN1   | predicted |
| CID19725    | SMN1    | predicted |
| CID445638   | SLCO1B1 | predicted |
| CID6989     | MAPT    | predicted |
| CID445070   | HTR2B   | predicted |
| CID12313332 | MAPK1   | predicted |
| CID379      | CYP2D6  | predicted |
| CID25240035 | FABP3   | predicted |
| CID5280666  | CYP19A1 | predicted |
| CID521215   | TP53    | predicted |
| CID522266   | ESR1    | predicted |
| CID136330   | TP53    | predicted |
| CID6782     | KMT2A   | predicted |
| CID19602    | HMGCR   | predicted |
| CID445639   | ALOX15  | predicted |
| CID5385553  | KMT2A   | predicted |
| CID5283316  | TDP1    | predicted |
| CID10703    | BACE1   | predicted |
| CID61041    | KMT2A   | predicted |
| CID519764   | SMN1    | predicted |
| CID637511   | HTT     | predicted |
| CID10467    | PTPN1   | predicted |
| CID11197    | PTPN1   | predicted |
| CID23443619 | CYP3A4  | predicted |
| CID5246487  | AHR     | predicted |
| CID5319551  | SLCO1B1 | predicted |

|              |          |           |
|--------------|----------|-----------|
| CID5280961   | SLC22A3  | predicted |
| CID8215      | PTPN1    | predicted |
| CID5281601   | CA1      | predicted |
| CID5317346   | CYP19A1  | predicted |
| CID5315472   | ALOX15   | predicted |
| CID5281767   | SMN1     | predicted |
| CID14240392  | HSP90AA1 | predicted |
| CID5362828   | KMT2A    | predicted |
| CID5280379   | SHBG     | predicted |
| CID5281984   | TDP1     | predicted |
| CID68352     | NPC1     | predicted |
| CID108011    | ALDH1A1  | predicted |
| CID441643    | POLB     | predicted |
| CID25034024  | KMT2A    | predicted |
| CID100938406 | PTPN1    | predicted |
| CID14367555  | KMT2A    | predicted |
| CID14633000  | KMT2A    | predicted |
| CID5317598   | PTPN1    | predicted |
| CID154699541 | ALOX5    | predicted |
| CID11068834  | ABCG2    | predicted |
| CID5316208   | CYP19A1  | predicted |
| CID45359845  | SHBG     | predicted |
| CID14543212  | PPARG    | predicted |
| CID578234    | NPSR1    | predicted |
| CID14191393  | PPARG    | predicted |
| CID387977    | ALOX15   | predicted |
| CID3559861   | HSP90AA1 | predicted |
| CID42608153  | PPARG    | predicted |
| CID131751498 | TDP1     | predicted |
| CID101953463 | BACE1    | predicted |
| CID13347321  | TDP1     | predicted |
| CID14191392  | RAB9A    | predicted |
| CID10039429  | TDP1     | predicted |
| CID13010829  | CA7      | predicted |
| CID10017580  | SMN1     | predicted |
| CID13118283  | RAB9A    | predicted |
| CID131752799 | ALDH1A1  | predicted |
| CID14543213  | PPARG    | predicted |
| CID14632997  | KMT2A    | predicted |
| CID14543199  | KMT2A    | predicted |
| CID11795     | HPRT1    | predicted |
| CID68073     | TSHR     | predicted |
| CID1550936   | KMT2A    | predicted |
| CID12314812  | PLA2G1B  | predicted |
| CID14543235  | KMT2A    | predicted |
| CID9906039   | ABCG2    | predicted |
| CID13347322  | PPARG    | predicted |
| CID131752986 | CA9      | predicted |
| CID57509469  | HSP90AA1 | predicted |
| CID75144776  | TDP1     | predicted |
| CID147446684 | CYP19A1  | predicted |
| CID536436    | NPC1     | predicted |
| CID10797750  | SLC37A4  | predicted |
| CID5312418   | PPARD    | predicted |
| CID5282751   | PPARD    | predicted |
| CID78178011  | PRKCA    | predicted |
| CID71363803  | POLB     | predicted |
| CID14107524  | PPARG    | predicted |



|              |         |           |
|--------------|---------|-----------|
| CID131752987 | KDM4E   | predicted |
| CID14632996  | KMT2A   | predicted |
| CID13967857  | KMT2A   | predicted |
| CID519762    | TP53    | predicted |
| CID14287395  | ALDH1A1 | predicted |
| CID90476927  | TDP1    | predicted |
| CID637429    | KDM4E   | predicted |
| CID57509470  | ALDH1A1 | predicted |
| CID14632994  | CYP19A1 | predicted |
| CID78171602  | CA9     | predicted |
| CID5469424   | KMT2A   | predicted |
| CID14543197  | KMT2A   | predicted |
| CID15858385  | CNR2    | predicted |
| CID14633011  | MPEG1   | predicted |
| CID10955433  | ACHE    | predicted |
| CID5324473   | SMN1    | predicted |
| CID44629981  | MAPK1   | predicted |
| CID49777919  | SMN1    | predicted |
| CID14367556  | KMT2A   | predicted |
| CID626934    | CYP2C19 | predicted |
| CID969516    | SMN1    | predicted |
| CID6115      | HIF1A   | predicted |
| CID5324476   | PTPN1   | predicted |
| CID5322095   | ALOX5   | predicted |
| CID101682279 | SHBG    | predicted |
| CID161686    | CYP19A1 | predicted |
| CID323273    | TNF     | predicted |
| CID23274265  | CYP19A1 | predicted |
| CID5316837   | KDM4E   | predicted |
| CID2528      | HTR2C   | predicted |
| CID5281614   | HIF1A   | predicted |
| CID440735    | CYP2C9  | predicted |
| CID12302281  | TNF     | predicted |
| CID10051276  | NPC1    | predicted |
| CID12302289  | NPC1    | predicted |
| CID12302290  | NPC1    | predicted |
| CID11197650  | KMT2A   | predicted |
| CID5280653   | KMT2A   | predicted |
| CID11373178  | AKR1B10 | predicted |
| CID11373177  | IL2     | predicted |
| CID6440515   | IL2     | predicted |
| CID5318717   | POLB    | predicted |
| CID10004345  | TNF     | predicted |
| CID9824100   | APEX1   | predicted |
| CID6324916   | POLB    | predicted |
| CID84298     | POLB    | predicted |
| CID11962122  | TP53    | predicted |
| CID10842393  | ALDH1A1 | predicted |
| CID5281232   | CYP19A1 | predicted |
| CID5281233   | ALDH1A1 | predicted |
| CID12315350  | TNF     | predicted |
| CID6325021   | L3MBTL1 | predicted |
| CID102404034 | TP53    | predicted |
| CID21769778  | TP53    | predicted |
| CID5281780   | CYP19A1 | predicted |
| CID5742692   | MAPK1   | predicted |
| CID15480861  | HIF1A   | predicted |
| CID442667    | BACE1   | predicted |

|              |         |           |
|--------------|---------|-----------|
| CID5742694   | MAPK1   | predicted |
| CID11372643  | L3MBTL1 | predicted |
| CID11418267  | TNF     | predicted |
| CID101675239 | GPBAR1  | predicted |
| CID261859    | TSHR    | predicted |
| CID3008859   | AKR1B10 | predicted |
| CID101350248 | GPBAR1  | predicted |
| CID3082301   | L3MBTL1 | predicted |
| CID14077819  | TDP1    | predicted |
| CID219100    | TSHR    | predicted |
| CID3008861   | CYP19A1 | predicted |
| CID21594154  | TNF     | predicted |
| CID5742691   | CYP19A1 | predicted |
| CID5742693   | MAPK1   | predicted |
| CID10730594  | ABCG2   | predicted |
| CID11742062  | TSHR    | predicted |
| CID10423983  | PTPRC   | predicted |
| CID101040104 | CYP19A1 | predicted |
| CID101040105 | EED     | predicted |
| CID10092871  | CYP19A1 | predicted |
| CID10720420  | PTPRC   | predicted |
| CID10532385  | ALOX15  | predicted |
| CID10788255  | TSHR    | predicted |
| CID101040112 | MAOA    | predicted |
| CID74223810  | RAB9A   | predicted |
| CID101040113 | ACHE    | predicted |
| CID101040110 | LMNA    | predicted |
| CID101040111 | LMNA    | predicted |
| CID101040114 | ESR2    | predicted |
| CID101040115 | NPC1    | predicted |
| CID219592    | CTNNB1  | predicted |
| CID44257393  | TDP1    | predicted |
| CID1738124   | ALDH1A1 | predicted |
| CID101243871 | L3MBTL1 | predicted |
| CID16592     | TP53    | predicted |
| CID5281675   | PTPN1   | predicted |
| CID5320582   | HSD11B1 | predicted |
| CID3008860   | RAB9A   | predicted |
| CID442433    | L3MBTL1 | predicted |
| CID11948668  | TNF     | predicted |
| CID3008858   | PRKCA   | predicted |
| CID14378605  | TNF     | predicted |
| CID73981590  | GPBAR1  | predicted |
| CID10787     | BACE1   | predicted |
| CID5317532   | CYP2C19 | predicted |
| CID87730829  | CA9     | predicted |
| CID14523449  | PTPN1   | predicted |
| CID138753594 | ALDH1A1 | predicted |
| CID610933    | TDP1    | predicted |
| CID70859637  | RAB9A   | predicted |
| CID3004155   | KMT2A   | predicted |
| CID53463561  | SMN1    | predicted |
| CID13914606  | AKR1B10 | predicted |
| CID76551288  | HSD11B2 | predicted |
| CID5281152   | ALDH1A1 | predicted |
| CID24814     | MAOB    | predicted |
| CID100058    | ALDH1A1 | predicted |
| CID5316844   | ACHE    | predicted |

|              |          |           |
|--------------|----------|-----------|
| CID10970376  | BACE1    | predicted |
| CID9884033   | KDM4E    | predicted |
| CID10741     | ABCB1    | predicted |
| CID10715291  | ADORA3   | predicted |
| CID44195972  | TDP1     | predicted |
| CID6122937   | PTPN1    | predicted |
| CID138714873 | ALDH1A1  | predicted |
| CID4490286   | POLB     | predicted |
| CID387101196 | TP53     | predicted |
| CID45783213  | L3MBTL1  | predicted |
| CID45783214  | ALDH1A1  | predicted |
| CID1201518   | CYP19A1  | predicted |
| CID12445022  | KMT2A    | predicted |
| CID8417      | MAPK1    | predicted |
| CID5280460   | LMNA     | predicted |
| CID5316647   | KDM4E    | predicted |
| CID5281792   | RAB9A    | predicted |
| CID196216    | ACHE     | predicted |
| CID519954    | TP53     | predicted |
| CID5322049   | HMGCR    | predicted |
| CID5322048   | ALDH1A1  | predicted |
| CID22559443  | NPC1     | predicted |
| CID5281663   | DYRK3    | predicted |
| CID296191    | CYP19A1  | predicted |
| CID68252     | NPC1     | predicted |
| CID5372954   | HSD17B10 | predicted |
| CID1549106   | RAB9A    | predicted |
| CID145627453 | TNF      | predicted |
| CID7424      | GAA      | predicted |
| CID1309      | KMT2A    | predicted |
| CID5321869   | BACE1    | predicted |
| CID5321200   | ALDH1A1  | predicted |
| CID4483044   | SHBG     | predicted |
| CID49824629  | CA9      | predicted |
| CID5321859   | LMNA     | predicted |
| CID3415719   | KMT2A    | predicted |
| CID5320471   | TP53     | predicted |
| CID5321865   | TP53     | predicted |
| CID71307292  | POLB     | predicted |
| CID21155632  | POLB     | predicted |
| CID547509    | F3       | predicted |
| CID5322076   | TDP1     | predicted |
| CID124211    | MAPK1    | predicted |
| CID14135334  | GAA      | predicted |
| CID5321205   | CA9      | predicted |
| CID4961358   | L3MBTL1  | predicted |
| CID20763017  | SMN1     | predicted |
| CID296119    | AKR1B1   | predicted |
| CID445858    | MAPT     | predicted |
| CID22376357  | ABCG2    | predicted |
| CID119034    | CYP19A1  | predicted |
| CID6552009   | CYP19A1  | predicted |
| CID5284500   | USP2     | predicted |
| CID12309393  | ALOX5    | predicted |
| CID101761    | TNF      | predicted |
| CID6973640   | CYP19A1  | predicted |
| CID6321405   | CYP19A1  | predicted |
| CID1567554   | CA1      | predicted |

|             |         |           |
|-------------|---------|-----------|
| CID4220788  | ALOX5   | predicted |
| CID20163303 | RAB9A   | predicted |
| CID455809   | TP53    | predicted |
| CID3082025  | TDP1    | predicted |
| CID6365403  | SOAT1   | predicted |
| CID73648    | ACHE    | predicted |
| CID8205     | TRPV1   | predicted |
| CID5320193  | RAB9A   | predicted |
| CID338      | HPGD    | predicted |
| CID11095    | CYP2C9  | predicted |
| CID5320384  | MAPK1   | predicted |
| CID22311    | MAPK1   | predicted |
| CID26049    | SMN1    | predicted |
| CID5282745  | PTPN1   | predicted |
| CID6438157  | PTPN1   | predicted |
| CID274352   | TP53    | predicted |
| CID5316834  | ALDH1A1 | predicted |
| CID5320475  | ALOX15  | predicted |
| CID5316833  | CTSV    | predicted |
| CID124869   | LMNA    | predicted |
| CID9816931  | KMT2A   | predicted |
| CID49773122 | ACHE    | predicted |
| CID402      | SOAT1   | predicted |
| CID111446   | ESR1    | predicted |
| CID15265    | ALOX15  | predicted |
| CID5351506  | KDM4E   | predicted |
| CID5245     | TP53    | predicted |
| CID767      | SMN1    | predicted |
| CID370      | SMN1    | predicted |
| CID19009    | GDA     | predicted |
| CID2353     | MAPT    | predicted |
| CID1115     | APEX1   | predicted |
| CID4068592  | ADORA2B | predicted |
| CID14896    | TP53    | predicted |
| CID6654     | SMN1    | predicted |
| CID638011   | CYP2A6  | predicted |
| CID521380   | NPC1    | predicted |
| CID608886   | TNF     | predicted |
| CID520159   | KMT2A   | predicted |
| CID10997578 | PPARG   | predicted |
| CID225      | AKR1B10 | predicted |
| CID223578   | MPEG1   | predicted |
| CID10168    | MAPK1   | predicted |
| CID5281607  | NPC1    | predicted |
| CID5255901  | ACHE    | predicted |
| CID471719   | TP53    | predicted |
| CID5282747  | CNR1    | predicted |
| CID61545    | SMN1    | predicted |
| CID15241817 | SMN1    | predicted |
| CID91520    | POLB    | predicted |
| CID11186895 | HTR2A   | predicted |
| CID485077   | NPC1    | predicted |
| CID89047    | SMN1    | predicted |
| CID12303797 | BACE1   | predicted |
| CID188516   | MAPK1   | predicted |
| CID5091219  | ALDH1A1 | predicted |
| CID5320211  | SMN1    | predicted |
| CID2214     | ACHE    | predicted |

|              |          |           |
|--------------|----------|-----------|
| CID289151    | NPC1     | predicted |
| CID23990     | TDP1     | predicted |
| CID2537      | CYP2C9   | predicted |
| CID6054      | CYP2D6   | predicted |
| CID5280450   | TSHR     | predicted |
| CID10465     | PTGIR    | predicted |
| CID19725     | TNF      | predicted |
| CID445638    | ALOX15   | predicted |
| CID6989      | HSD17B10 | predicted |
| CID445070    | HTR2C    | predicted |
| CID12313332  | GAA      | predicted |
| CID379       | LTA4H    | predicted |
| CID25240035  | FNTA     | predicted |
| CID5280666   | NR3C1    | predicted |
| CID521215    | TDP1     | predicted |
| CID522266    | SHBG     | predicted |
| CID136330    | TDP1     | predicted |
| CID6782      | CA2      | predicted |
| CID19602     | ALDH1A1  | predicted |
| CID445639    | USP2     | predicted |
| CID5385553   | L3MBTL1  | predicted |
| CID5283316   | ALOX5    | predicted |
| CID10703     | SMN1     | predicted |
| CID61041     | MAPK1    | predicted |
| CID519764    | MAPK1    | predicted |
| CID637511    | TP53     | predicted |
| CID10467     | PTGIR    | predicted |
| CID11197     | PTGIR    | predicted |
| CID23443619  | CYP2A6   | predicted |
| CID5246487   | MAPT     | predicted |
| CID5319551   | SLCO1B3  | predicted |
| CID5280961   | CYP1B1   | predicted |
| CID8215      | PTGIR    | predicted |
| CID5281601   | MAPK1    | predicted |
| CID5317346   | ALDH1A1  | predicted |
| CID5315472   | PTPN1    | predicted |
| CID5281767   | APEX1    | predicted |
| CID14240392  | ALDH1A1  | predicted |
| CID5362828   | MPEG1    | predicted |
| CID5280379   | NPSR1    | predicted |
| CID5281984   | NPSR1    | predicted |
| CID68352     | CYP19A1  | predicted |
| CID108011    | PTPN1    | predicted |
| CID441643    | KMT2A    | predicted |
| CID25034024  | POLB     | predicted |
| CID100938406 | POLB     | predicted |
| CID14367555  | PPARG    | predicted |
| CID14633000  | MPEG1    | predicted |
| CID5317598   | TP53     | predicted |
| CID154699541 | MAPK1    | predicted |
| CID11068834  | ALDH1A1  | predicted |
| CID5316208   | TDP1     | predicted |
| CID45359845  | TP53     | predicted |
| CID14543212  | RAB9A    | predicted |
| CID578234    | HTT      | predicted |
| CID14191393  | CYP19A1  | predicted |
| CID387977    | ACHE     | predicted |
| CID3559861   | ALDH1A1  | predicted |

|              |         |           |
|--------------|---------|-----------|
| CID42608153  | KMT2A   | predicted |
| CID131751498 | ACHE    | predicted |
| CID101953463 | ALOX15  | predicted |
| CID13347321  | TP53    | predicted |
| CID14191392  | GPBAR1  | predicted |
| CID10039429  | KMT2A   | predicted |
| CID13010829  | KMT2A   | predicted |
| CID10017580  | TP53    | predicted |
| CID13118283  | ALOX5   | predicted |
| CID131752799 | NPSR1   | predicted |
| CID14543213  | TNF     | predicted |
| CID14632997  | MPEG1   | predicted |
| CID14543199  | HSD11B1 | predicted |
| CID11795     | NISCH   | predicted |
| CID68073     | NFKB1   | predicted |
| CID1550936   | PTPN1   | predicted |
| CID12314812  | CYP19A1 | predicted |
| CID14543235  | ALDH1A1 | predicted |
| CID9906039   | ALDH1A1 | predicted |
| CID13347322  | ALOX15  | predicted |
| CID131752986 | KMT2A   | predicted |
| CID57509469  | TP53    | predicted |
| CID75144776  | CYP19A1 | predicted |
| CID147446684 | TP53    | predicted |
| CID536436    | TDP1    | predicted |
| CID10797750  | USP2    | predicted |
| CID5312418   | ALDH1A1 | predicted |
| CID5282751   | ALDH1A1 | predicted |
| CID78178011  | RAB9A   | predicted |
| CID71363803  | ALOX5   | predicted |
| CID14107524  | ACHE    | predicted |
| CID131752987 | PTPN1   | predicted |
| CID14632996  | ACHE    | predicted |
| CID13967857  | PPARG   | predicted |
| CID519762    | SHBG    | predicted |
| CID14287395  | HSD11B1 | predicted |
| CID90476927  | KMT2A   | predicted |
| CID637429    | AKR1B1  | predicted |
| CID57509470  | HSD11B1 | predicted |
| CID14632994  | SMN1    | predicted |
| CID78171602  | CA1     | predicted |
| CID5469424   | ALOX15  | predicted |
| CID14543197  | HSD11B1 | predicted |
| CID15858385  | ALOX5   | predicted |
| CID14633011  | ALDH1A1 | predicted |
| CID10955433  | TYR     | predicted |
| CID5324473   | CA9     | predicted |
| CID44629981  | ALOX15  | predicted |
| CID49777919  | ALDH1A1 | predicted |
| CID14367556  | PPARG   | predicted |
| CID626934    | RAB9A   | predicted |
| CID969516    | APEX1   | predicted |
| CID6115      | CYP2D6  | predicted |
| CID5324476   | ACHE    | predicted |
| CID5322095   | ACHE    | predicted |
| CID101682279 | NPC1    | predicted |
| CID161686    | SHBG    | predicted |
| CID323273    | POLB    | predicted |

|              |         |           |
|--------------|---------|-----------|
| CID23274265  | PPARG   | predicted |
| CID5316837   | LMNA    | predicted |
| CID2528      | KMT2A   | predicted |
| CID5281614   | CYP1A1  | predicted |
| CID440735    | AMY1A   | predicted |
| CID12302281  | CYP19A1 | predicted |
| CID10051276  | AKR1B10 | predicted |
| CID12302289  | ALDH1A1 | predicted |
| CID12302290  | ALDH1A1 | predicted |
| CID11197650  | ALDH1A1 | predicted |
| CID5280653   | ALDH1A1 | predicted |
| CID11373178  | TP53    | predicted |
| CID11373177  | L3MBTL1 | predicted |
| CID6440515   | L3MBTL1 | predicted |
| CID5318717   | BACE1   | predicted |
| CID10004345  | CYP19A1 | predicted |
| CID9824100   | KDM4E   | predicted |
| CID6324916   | KMT2A   | predicted |
| CID84298     | KMT2A   | predicted |
| CID11962122  | KDM4E   | predicted |
| CID10842393  | CYP19A1 | predicted |
| CID5281232   | ABCG2   | predicted |
| CID5281233   | KMT2A   | predicted |
| CID12315350  | POLB    | predicted |
| CID6325021   | TNF     | predicted |
| CID102404034 | HMGCR   | predicted |
| CID21769778  | HMGCR   | predicted |
| CID5281780   | KDM4E   | predicted |
| CID5742692   | ODC1    | predicted |
| CID15480861  | PLA2G1B | predicted |
| CID442667    | PTGS1   | predicted |
| CID5742694   | ODC1    | predicted |
| CID11372643  | POLB    | predicted |
| CID11418267  | L3MBTL1 | predicted |
| CID101675239 | TP53    | predicted |
| CID261859    | NFKB1   | predicted |
| CID3008859   | SHBG    | predicted |
| CID101350248 | L3MBTL1 | predicted |
| CID3082301   | POLB    | predicted |
| CID14077819  | TP53    | predicted |
| CID219100    | PTPN1   | predicted |
| CID3008861   | TNF     | predicted |
| CID21594154  | CYP19A1 | predicted |
| CID5742691   | LMNA    | predicted |
| CID5742693   | ODC1    | predicted |
| CID10730594  | TSHR    | predicted |
| CID11742062  | ABCG2   | predicted |
| CID10423983  | LMNA    | predicted |
| CID101040104 | CA1     | predicted |
| CID101040105 | ABCG2   | predicted |
| CID10092871  | TSHR    | predicted |
| CID10720420  | CYP2A6  | predicted |
| CID10532385  | ABCG2   | predicted |
| CID10788255  | ACHE    | predicted |
| CID101040112 | CYP2C19 | predicted |
| CID74223810  | KDM4E   | predicted |
| CID101040113 | MAOA    | predicted |
| CID101040110 | TDP1    | predicted |

|              |          |           |
|--------------|----------|-----------|
| CID101040111 | ACHE     | predicted |
| CID101040114 | MAPK1    | predicted |
| CID101040115 | ALDH1A1  | predicted |
| CID219592    | PTPRC    | predicted |
| CID44257393  | BCHE     | predicted |
| CID1738124   | SHBG     | predicted |
| CID101243871 | KMT2A    | predicted |
| CID16592     | NOS1     | predicted |
| CID5281675   | SMN1     | predicted |
| CID5320582   | HSP90AA1 | predicted |
| CID3008860   | CYP19A1  | predicted |
| CID442433    | TNF      | predicted |
| CID11948668  | L3MBTL1  | predicted |
| CID3008858   | SHBG     | predicted |
| CID14378605  | L3MBTL1  | predicted |
| CID73981590  | L3MBTL1  | predicted |
| CID10787     | ALOX5    | predicted |
| CID5317532   | RAB9A    | predicted |
| CID87730829  | CYP3A4   | predicted |
| CID14523449  | TREH     | predicted |
| CID138753594 | KMT2A    | predicted |
| CID610933    | PPARG    | predicted |
| CID70859637  | CYP2D6   | predicted |
| CID3004155   | HSP90AA1 | predicted |
| CID53463561  | ALDH1A1  | predicted |
| CID13914606  | SHBG     | predicted |
| CID76551288  | AKR1B1   | predicted |
| CID5281152   | MAP2K1   | predicted |
| CID24814     | IDO1     | predicted |
| CID100058    | KMT2A    | predicted |
| CID5316844   | TP53     | predicted |
| CID10970376  | ODC1     | predicted |
| CID9884033   | PTPN1    | predicted |
| CID10741     | CA9      | predicted |
| CID10715291  | BACE1    | predicted |
| CID44195972  | EGFR     | predicted |
| CID6122937   | CYP3A4   | predicted |
| CID138714873 | PTPN1    | predicted |
| CID4490286   | TP53     | predicted |
| CID387101196 | SMN1     | predicted |
| CID45783213  | ALDH1A1  | predicted |
| CID45783214  | L3MBTL1  | predicted |
| CID1201518   | SLCO1B1  | predicted |
| CID12445022  | CYP19A1  | predicted |
| CID8417      | KMT2A    | predicted |
| CID5280460   | CA5A     | predicted |
| CID5316647   | GAA      | predicted |
| CID5281792   | CA1      | predicted |
| CID196216    | KMT2A    | predicted |
| CID519954    | ALOX15   | predicted |
| CID5322049   | ALOX15   | predicted |
| CID5322048   | TP53     | predicted |
| CID22559443  | CYP19A1  | predicted |
| CID5281663   | DYRK4    | predicted |
| CID296191    | PTPN2    | predicted |
| CID68252     | CNR1     | predicted |
| CID5372954   | SMN1     | predicted |
| CID1549106   | CA9      | predicted |



|              |         |           |
|--------------|---------|-----------|
| CID145627453 | CYP19A1 | predicted |
| CID7424      | TDP1    | predicted |
| CID1309      | CYP19A1 | predicted |
| CID5321869   | PTPN1   | predicted |
| CID5321200   | TDP1    | predicted |
| CID4483044   | IL2     | predicted |
| CID49824629  | CA12    | predicted |
| CID5321859   | TP53    | predicted |
| CID3415719   | TAAR1   | predicted |
| CID5320471   | HPGD    | predicted |
| CID5321865   | ACHE    | predicted |
| CID71307292  | KDM4E   | predicted |
| CID21155632  | TP53    | predicted |
| CID547509    | CYP2C19 | predicted |
| CID5322076   | CYP19A1 | predicted |
| CID124211    | KDM4E   | predicted |
| CID14135334  | L3MBTL1 | predicted |
| CID5321205   | CA1     | predicted |
| CID4961358   | PSIP1   | predicted |
| CID20763017  | XBP1    | predicted |
| CID296119    | L3MBTL1 | predicted |
| CID445858    | CYP3A4  | predicted |
| CID22376357  | APEX1   | predicted |
| CID119034    | PTPN2   | predicted |
| CID6552009   | SLCO1B1 | predicted |
| CID5284500   | CYP2C9  | predicted |
| CID12309393  | KMT2A   | predicted |
| CID101761    | CYP19A1 | predicted |
| CID6973640   | SLCO1B1 | predicted |
| CID6321405   | SLCO1B1 | predicted |
| CID1567554   | ACHE    | predicted |
| CID4220788   | KMT2A   | predicted |
| CID20163303  | ALOX5   | predicted |
| CID455809    | CA9     | predicted |
| CID3082025   | CYP2C9  | predicted |
| CID6365403   | CYP2E1  | predicted |
| CID73648     | ODC1    | predicted |
| CID8205      | TP53    | predicted |
| CID5320193   | ACHE    | predicted |
| CID338       | LMNA    | predicted |
| CID11095     | AMY1A   | predicted |
| CID5320384   | RECQL   | predicted |
| CID22311     | KMT2A   | predicted |
| CID26049     | ACHE    | predicted |
| CID5282745   | CYP3A4  | predicted |
| CID6438157   | CNR1    | predicted |
| CID274352    | RAB9A   | predicted |
| CID5316834   | KMT2A   | predicted |
| CID5320475   | ALDH1A1 | predicted |
| CID5316833   | MAPK1   | predicted |
| CID124869    | TSHR    | predicted |
| CID9816931   | ALDH1A1 | predicted |
| CID49773122  | TK1     | predicted |
| CID402       | CYP2E1  | predicted |
| CID111446    | SHBG    | predicted |
| CID15265     | FABP3   | predicted |
| CID5351506   | APEX1   | predicted |
| CID5245      | TDP1    | predicted |

|             |         |           |
|-------------|---------|-----------|
| CID767      | KDM4E   | predicted |
| CID370      | BLM     | predicted |
| CID19009    | HIF1A   | predicted |
| CID2353     | NFKB1   | predicted |
| CID1115     | PSIP1   | predicted |
| CID4068592  | ALOX15  | predicted |
| CID14896    | ALDH1A1 | predicted |
| CID6654     | RAB9A   | predicted |
| CID638011   | MAPK1   | predicted |
| CID521380   | KMT2A   | predicted |
| CID608886   | CYP19A1 | predicted |
| CID520159   | ALOX5   | predicted |
| CID10997578 | ALOX15  | predicted |
| CID225      | NPC1    | predicted |
| CID223578   | ALDH1A1 | predicted |
| CID10168    | BLM     | predicted |
| CID5281607  | ALDH2   | predicted |
| CID5255901  | GPBAR1  | predicted |
| CID471719   | MAPK1   | predicted |
| CID5282747  | ALDH1A1 | predicted |
| CID61545    | TP53    | predicted |
| CID15241817 | TP53    | predicted |
| CID91520    | APEX1   | predicted |
| CID11186895 | HTR1D   | predicted |
| CID485077   | ABCG2   | predicted |
| CID89047    | ALDH1A1 | predicted |
| CID12303797 | CA9     | predicted |
| CID188516   | ELAVL1  | predicted |
| CID5091219  | KMT2A   | predicted |
| CID5320211  | RAB9A   | predicted |
| CID2214     | TP53    | predicted |
| CID289151   | HSD11B2 | predicted |
| CID23990    | BCHE    | predicted |
| CID2537     | TDP1    | predicted |
| CID6054     | HRH3    | predicted |
| CID5280450  | USP2    | predicted |
| CID10465    | TLR2    | predicted |
| CID19725    | PTPN2   | predicted |
| CID445638   | TSHR    | predicted |
| CID6989     | RAB9A   | predicted |
| CID445070   | PPARA   | predicted |
| CID12313332 | BACE1   | predicted |
| CID379      | SMN1    | predicted |
| CID25240035 | TDP1    | predicted |
| CID5280666  | CBR1    | predicted |
| CID521215   | SLCO1B3 | predicted |
| CID522266   | CYP19A1 | predicted |
| CID136330   | ABCG2   | predicted |
| CID6782     | PTPN1   | predicted |
| CID19602    | ALOX5   | predicted |
| CID445639   | ALDH1A1 | predicted |
| CID5385553  | ALDH1A1 | predicted |
| CID5283316  | CYP2A6  | predicted |
| CID10703    | TP53    | predicted |
| CID61041    | ACHE    | predicted |
| CID519764   | BCHE    | predicted |
| CID637511   | KDM4E   | predicted |
| CID10467    | TLR2    | predicted |

|              |          |           |
|--------------|----------|-----------|
| CID11197     | TLR2     | predicted |
| CID23443619  | HIF1A    | predicted |
| CID5246487   | CA12     | predicted |
| CID5319551   | TP53     | predicted |
| CID5280961   | NFKB1    | predicted |
| CID8215      | TLR2     | predicted |
| CID5281601   | ACHE     | predicted |
| CID5317346   | KDM4E    | predicted |
| CID5315472   | TDP1     | predicted |
| CID5281767   | CASP7    | predicted |
| CID14240392  | TP53     | predicted |
| CID5362828   | MAPK1    | predicted |
| CID5280379   | CYP19A1  | predicted |
| CID5281984   | CYP19A1  | predicted |
| CID68352     | NFKB1    | predicted |
| CID108011    | KMT2A    | predicted |
| CID441643    | ALDH1A1  | predicted |
| CID25034024  | ALDH1A1  | predicted |
| CID100938406 | KMT2A    | predicted |
| CID14367555  | ACHE     | predicted |
| CID14633000  | SHBG     | predicted |
| CID5317598   | ALOX5    | predicted |
| CID154699541 | ACHE     | predicted |
| CID11068834  | KDM4E    | predicted |
| CID5316208   | HSD11B1  | predicted |
| CID45359845  | CYP19A1  | predicted |
| CID14543212  | GPBAR1   | predicted |
| CID578234    | ALDH1A1  | predicted |
| CID14191393  | HSP90AA1 | predicted |
| CID387977    | GPBAR1   | predicted |
| CID3559861   | TP53     | predicted |
| CID42608153  | TRPV1    | predicted |
| CID131751498 | SMN1     | predicted |
| CID101953463 | CYP1B1   | predicted |
| CID13347321  | ABCG2    | predicted |
| CID14191392  | MAPK1    | predicted |
| CID10039429  | ACHE     | predicted |
| CID13010829  | TP53     | predicted |
| CID10017580  | ACHE     | predicted |
| CID13118283  | ALOX15   | predicted |
| CID131752799 | HSD17B10 | predicted |
| CID14543213  | RAB9A    | predicted |
| CID14632997  | SHBG     | predicted |
| CID14543199  | ACHE     | predicted |
| CID11795     | CYP2D6   | predicted |
| CID68073     | THPO     | predicted |
| CID1550936   | SMN1     | predicted |
| CID12314812  | PDE4D    | predicted |
| CID14543235  | MAPK1    | predicted |
| CID9906039   | KMT2A    | predicted |
| CID13347322  | NPC1     | predicted |
| CID131752986 | ALOX15   | predicted |
| CID57509469  | NFKB1    | predicted |
| CID75144776  | KMT2A    | predicted |
| CID147446684 | NFKB1    | predicted |
| CID536436    | ACHE     | predicted |
| CID10797750  | RECQL    | predicted |
| CID5312418   | FABP3    | predicted |

|              |          |           |
|--------------|----------|-----------|
| CID5282751   | FABP3    | predicted |
| CID78178011  | HSD11B1  | predicted |
| CID71363803  | SMN1     | predicted |
| CID14107524  | IDO1     | predicted |
| CID131752987 | HSD17B10 | predicted |
| CID14632996  | PPARG    | predicted |
| CID13967857  | MAPK1    | predicted |
| CID519762    | TRPA1    | predicted |
| CID14287395  | MAPK1    | predicted |
| CID90476927  | CYP3A4   | predicted |
| CID637429    | CA1      | predicted |
| CID57509470  | TDP1     | predicted |
| CID14632994  | ALDH1A1  | predicted |
| CID78171602  | ALOX15   | predicted |
| CID5469424   | CYP19A1  | predicted |
| CID14543197  | SHBG     | predicted |
| CID15858385  | ACHE     | predicted |
| CID14633011  | TDP1     | predicted |
| CID10955433  | CNR1     | predicted |
| CID5324473   | KDM4E    | predicted |
| CID44629981  | KMT2A    | predicted |
| CID49777919  | CA2      | predicted |
| CID14367556  | ACHE     | predicted |
| CID626934    | ABCG2    | predicted |
| CID969516    | CASP7    | predicted |
| CID6115      | ALOX15   | predicted |
| CID5324476   | CA9      | predicted |
| CID5322095   | FABP3    | predicted |
| CID101682279 | SLCO1B3  | predicted |
| CID161686    | PTPN2    | predicted |
| CID323273    | ALDH1A1  | predicted |
| CID23274265  | GPBAR1   | predicted |
| CID5316837   | CA9      | predicted |
| CID2528      | PCNA     | predicted |
| CID5281614   | CYP1B1   | predicted |
| CID440735    | UGT1A10  | predicted |
| CID12302281  | PTPN2    | predicted |
| CID10051276  | TDP1     | predicted |
| CID12302289  | TDP1     | predicted |
| CID12302290  | TDP1     | predicted |
| CID11197650  | PRKCA    | predicted |
| CID5280653   | PRKCA    | predicted |
| CID11373178  | ALDH1A1  | predicted |
| CID11373177  | PTPN1    | predicted |
| CID6440515   | PTPN1    | predicted |
| CID5318717   | PTPN1    | predicted |
| CID10004345  | PTPN2    | predicted |
| CID9824100   | SMN1     | predicted |
| CID6324916   | TP53     | predicted |
| CID84298     | TP53     | predicted |
| CID11962122  | ALDH1A1  | predicted |
| CID10842393  | IL2      | predicted |
| CID5281232   | CA12     | predicted |
| CID5281233   | PTPN1    | predicted |
| CID12315350  | ALDH1A1  | predicted |
| CID6325021   | POLB     | predicted |
| CID102404034 | ALDH1A1  | predicted |
| CID21769778  | ALDH1A1  | predicted |

|              |         |           |
|--------------|---------|-----------|
| CID5281780   | ALDH1A1 | predicted |
| CID5742692   | CTSV    | predicted |
| CID15480861  | ACHE    | predicted |
| CID442667    | ALDH1A1 | predicted |
| CID5742694   | ACHE    | predicted |
| CID11372643  | KMT2A   | predicted |
| CID11418267  | GPBAR1  | predicted |
| CID101675239 | HTT     | predicted |
| CID261859    | THPO    | predicted |
| CID3008859   | NPSR1   | predicted |
| CID101350248 | POLB    | predicted |
| CID3082301   | KMT2A   | predicted |
| CID14077819  | MAPK1   | predicted |
| CID219100    | MAPK1   | predicted |
| CID3008861   | NPSR1   | predicted |
| CID21594154  | PTPN2   | predicted |
| CID5742691   | NPC1    | predicted |
| CID5742693   | ACHE    | predicted |
| CID10730594  | CYP19A1 | predicted |
| CID11742062  | PTGS1   | predicted |
| CID10423983  | ABCG2   | predicted |
| CID101040104 | BACE1   | predicted |
| CID101040105 | KMT2A   | predicted |
| CID10092871  | LMNA    | predicted |
| CID10720420  | BACE1   | predicted |
| CID10532385  | TSHR    | predicted |
| CID10788255  | KMT2A   | predicted |
| CID101040112 | ACHE    | predicted |
| CID74223810  | ALOX15  | predicted |
| CID101040113 | CYP2C19 | predicted |
| CID101040110 | ALOX15  | predicted |
| CID101040111 | TP53    | predicted |
| CID101040114 | TDP1    | predicted |
| CID101040115 | ALOX15  | predicted |
| CID219592    | CYP19A1 | predicted |
| CID44257393  | NPC1    | predicted |
| CID1738124   | TRPV1   | predicted |
| CID101243871 | POLB    | predicted |
| CID16592     | GALE    | predicted |
| CID5281675   | MAPK1   | predicted |
| CID5320582   | L3MBTL1 | predicted |
| CID3008860   | CYP3A4  | predicted |
| CID442433    | POLB    | predicted |
| CID11948668  | HSD11B1 | predicted |
| CID3008858   | ALOX5   | predicted |
| CID14378605  | HSD11B1 | predicted |
| CID73981590  | POLB    | predicted |
| CID10787     | CA7     | predicted |
| CID5317532   | TDP1    | predicted |
| CID87730829  | TDP1    | predicted |
| CID14523449  | GLA     | predicted |
| CID138753594 | PTPN1   | predicted |
| CID610933    | ABCB1   | predicted |
| CID70859637  | NPC1    | predicted |
| CID3004155   | NPSR1   | predicted |
| CID53463561  | OPRM1   | predicted |
| CID13914606  | NPSR1   | predicted |
| CID76551288  | L3MBTL1 | predicted |

|              |          |           |
|--------------|----------|-----------|
| CID5281152   | PTPN1    | predicted |
| CID24814     | CASP1    | predicted |
| CID100058    | POLB     | predicted |
| CID5316844   | ALDH1A1  | predicted |
| CID10970376  | KDM4E    | predicted |
| CID9884033   | KMT2A    | predicted |
| CID10741     | CA12     | predicted |
| CID10715291  | KDM4E    | predicted |
| CID44195972  | ACHE     | predicted |
| CID6122937   | AKR1B1   | predicted |
| CID138714873 | KMT2A    | predicted |
| CID4490286   | IL2      | predicted |
| CID387101196 | AADAC    | predicted |
| CID45783213  | POLB     | predicted |
| CID45783214  | TNF      | predicted |
| CID1201518   | TDP1     | predicted |
| CID12445022  | EED      | predicted |
| CID8417      | F3       | predicted |
| CID5280460   | SMN1     | predicted |
| CID5316647   | CYP19A1  | predicted |
| CID5281792   | TP53     | predicted |
| CID196216    | PPARG    | predicted |
| CID519954    | GPBAR1   | predicted |
| CID5322049   | HSD17B10 | predicted |
| CID5322048   | LMNA     | predicted |
| CID22559443  | PPARG    | predicted |
| CID5281663   | PIM3     | predicted |
| CID296191    | SLCO1B3  | predicted |
| CID68252     | KMT2A    | predicted |
| CID5372954   | RAB9A    | predicted |
| CID1549106   | HSD17B10 | predicted |
| CID145627453 | PTPN2    | predicted |
| CID7424      | MAPT     | predicted |
| CID1309      | MAOA     | predicted |
| CID5321869   | KDM4E    | predicted |
| CID5321200   | CYP2C19  | predicted |
| CID4483044   | AKR1B1   | predicted |
| CID49824629  | KDM4E    | predicted |
| CID5321859   | HSD17B10 | predicted |
| CID3415719   | CYP2C19  | predicted |
| CID5320471   | LMNA     | predicted |
| CID5321865   | PTPN1    | predicted |
| CID71307292  | ACHE     | predicted |
| CID21155632  | KDM4E    | predicted |
| CID547509    | HTR2C    | predicted |
| CID5322076   | CA1      | predicted |
| CID124211    | ODC1     | predicted |
| CID14135334  | KDM4E    | predicted |
| CID5321205   | BACE1    | predicted |
| CID4961358   | CYP19A1  | predicted |
| CID20763017  | TNF      | predicted |
| CID296119    | CYP19A1  | predicted |
| CID445858    | GAA      | predicted |
| CID22376357  | PTPN1    | predicted |
| CID119034    | SLCO1B3  | predicted |
| CID6552009   | TDP1     | predicted |
| CID5284500   | TDP1     | predicted |
| CID12309393  | NPC1     | predicted |

|             |          |           |
|-------------|----------|-----------|
| CID101761   | PTPN2    | predicted |
| CID6973640  | TDP1     | predicted |
| CID6321405  | TDP1     | predicted |
| CID1567554  | TP53     | predicted |
| CID4220788  | NPC1     | predicted |
| CID20163303 | MAPK1    | predicted |
| CID455809   | PDE4D    | predicted |
| CID3082025  | NPC1     | predicted |
| CID6365403  | SMN1     | predicted |
| CID73648    | KDM4E    | predicted |
| CID8205     | TDP1     | predicted |
| CID5320193  | NPC1     | predicted |
| CID338      | TSHR     | predicted |
| CID11095    | UGT1A10  | predicted |
| CID5320384  | PPARG    | predicted |
| CID22311    | RAB9A    | predicted |
| CID26049    | SLCO1B3  | predicted |
| CID5282745  | PTGIR    | predicted |
| CID6438157  | ALDH1A1  | predicted |
| CID274352   | KMT2A    | predicted |
| CID5316834  | TP53     | predicted |
| CID5320475  | HSD17B10 | predicted |
| CID5316833  | TP53     | predicted |
| CID124869   | RECQL    | predicted |
| CID9816931  | ALOX15   | predicted |
| CID49773122 | MAOA     | predicted |
| CID402      | SMN1     | predicted |
| CID111446   | XBP1     | predicted |
| CID15265    | PPARA    | predicted |
| CID5351506  | BACE1    | predicted |
| CID5245     | SMN1     | predicted |
| CID767      | KMT2A    | predicted |
| CID370      | CYP2C19  | predicted |
| CID19009    | KDM4E    | predicted |
| CID2353     | ALDH1A1  | predicted |
| CID1115     | TNF      | predicted |
| CID4068592  | HPGD     | predicted |
| CID14896    | TNF      | predicted |
| CID6654     | TP53     | predicted |
| CID638011   | PPARG    | predicted |
| CID521380   | GPBAR1   | predicted |
| CID608886   | PTPN2    | predicted |
| CID520159   | CA1      | predicted |
| CID10997578 | TDP1     | predicted |
| CID225      | SLCO1B3  | predicted |
| CID223578   | TDP1     | predicted |
| CID10168    | LTB4R    | predicted |
| CID5281607  | CYP2D6   | predicted |
| CID5255901  | HSP90AA1 | predicted |
| CID471719   | TSHR     | predicted |
| CID5282747  | TP53     | predicted |
| CID61545    | HDAC11   | predicted |
| CID15241817 | HDAC11   | predicted |
| CID91520    | PSIP1    | predicted |
| CID11186895 | MTNR1A   | predicted |
| CID485077   | SMN1     | predicted |
| CID89047    | KMT2A    | predicted |
| CID12303797 | PDE4D    | predicted |

|              |         |           |
|--------------|---------|-----------|
| CID188516    | PPARG   | predicted |
| CID5091219   | SHBG    | predicted |
| CID5320211   | ABCG2   | predicted |
| CID2214      | TSHR    | predicted |
| CID289151    | SMN1    | predicted |
| CID23990     | CYP19A1 | predicted |
| CID2537      | CYP2C19 | predicted |
| CID6054      | HRH1    | predicted |
| CID5280450   | SLCO1B3 | predicted |
| CID10465     | FNTA    | predicted |
| CID19725     | ACHE    | predicted |
| CID445638    | USP2    | predicted |
| CID6989      | CYP3A4  | predicted |
| CID445070    | HTR6    | predicted |
| CID12313332  | PDE5A   | predicted |
| CID379       | ALOX15  | predicted |
| CID25240035  | PPARA   | predicted |
| CID5280666   | CYP2C19 | predicted |
| CID521215    | MAPK1   | predicted |
| CID522266    | XBP1    | predicted |
| CID136330    | PDE4D   | predicted |
| CID6782      | MAPK1   | predicted |
| CID19602     | SMN1    | predicted |
| CID445639    | RECQL   | predicted |
| CID5385553   | BACE1   | predicted |
| CID5283316   | PTPN1   | predicted |
| CID10703     | KMT2A   | predicted |
| CID61041     | ALOX15  | predicted |
| CID519764    | CYP19A1 | predicted |
| CID637511    | SMN1    | predicted |
| CID10467     | FNTA    | predicted |
| CID11197     | FNTA    | predicted |
| CID23443619  | L3MBTL1 | predicted |
| CID5246487   | CA2     | predicted |
| CID5319551   | TNF     | predicted |
| CID5280961   | SMN1    | predicted |
| CID8215      | FNTA    | predicted |
| CID5281601   | CYP2C19 | predicted |
| CID5317346   | CA9     | predicted |
| CID5315472   | CYP19A1 | predicted |
| CID5281767   | RAB9A   | predicted |
| CID14240392  | HTT     | predicted |
| CID5362828   | SHBG    | predicted |
| CID5280379   | HTT     | predicted |
| CID5281984   | HTT     | predicted |
| CID68352     | CYP2C19 | predicted |
| CID108011    | APEX1   | predicted |
| CID441643    | APEX1   | predicted |
| CID25034024  | CA9     | predicted |
| CID100938406 | F10     | predicted |
| CID14367555  | ABCG2   | predicted |
| CID14633000  | TNF     | predicted |
| CID5317598   | SMN1    | predicted |
| CID154699541 | SMN1    | predicted |
| CID11068834  | BACE1   | predicted |
| CID5316208   | ALOX5   | predicted |
| CID45359845  | TDP1    | predicted |
| CID14543212  | KMT2A   | predicted |



|              |          |           |
|--------------|----------|-----------|
| CID578234    | AKR1B10  | predicted |
| CID14191393  | NPSR1    | predicted |
| CID387977    | HSP90AA1 | predicted |
| CID3559861   | HTT      | predicted |
| CID42608153  | TDP1     | predicted |
| CID131751498 | CYP2A6   | predicted |
| CID101953463 | NPC1     | predicted |
| CID13347321  | KMT2A    | predicted |
| CID14191392  | ALOX15   | predicted |
| CID10039429  | TP53     | predicted |
| CID13010829  | CA14     | predicted |
| CID10017580  | HSD17B10 | predicted |
| CID13118283  | KMT2A    | predicted |
| CID131752799 | RAB9A    | predicted |
| CID14543213  | MAPK1    | predicted |
| CID14632997  | TNF      | predicted |
| CID14543199  | TDP1     | predicted |
| CID11795     | LMNA     | predicted |
| CID68073     | AR       | predicted |
| CID1550936   | AKR1C3   | predicted |
| CID12314812  | USP2     | predicted |
| CID14543235  | TP53     | predicted |
| CID9906039   | ACHE     | predicted |
| CID13347322  | MAPK1    | predicted |
| CID131752986 | HSD17B10 | predicted |
| CID57509469  | NPSR1    | predicted |
| CID75144776  | ESR2     | predicted |
| CID147446684 | CA9      | predicted |
| CID536436    | SHBG     | predicted |
| CID10797750  | CA2      | predicted |
| CID5312418   | PTPN1    | predicted |
| CID5282751   | PTPN1    | predicted |
| CID78178011  | ALDH1A1  | predicted |
| CID71363803  | HSD11B1  | predicted |
| CID14107524  | ALDH1A1  | predicted |
| CID131752987 | CA9      | predicted |
| CID14632996  | NPC1     | predicted |
| CID13967857  | TDP1     | predicted |
| CID519762    | KMT2A    | predicted |
| CID14287395  | TNF      | predicted |
| CID90476927  | PPARG    | predicted |
| CID637429    | NPC1     | predicted |
| CID57509470  | ACHE     | predicted |
| CID14632994  | POLB     | predicted |
| CID78171602  | PPARG    | predicted |
| CID5469424   | KDM4E    | predicted |
| CID14543197  | TDP1     | predicted |
| CID15858385  | TDP1     | predicted |
| CID14633011  | MAPK1    | predicted |
| CID10955433  | TDP1     | predicted |
| CID5324473   | ALOX5    | predicted |
| CID44629981  | CYP19A1  | predicted |
| CID49777919  | LMNA     | predicted |
| CID14367556  | ABCG2    | predicted |
| CID626934    | KMT2A    | predicted |
| CID969516    | RAB9A    | predicted |
| CID6115      | MAPK1    | predicted |
| CID5324476   | ALOX15   | predicted |

|              |         |           |
|--------------|---------|-----------|
| CID5322095   | CNR1    | predicted |
| CID101682279 | SLCO1B1 | predicted |
| CID161686    | SLCO1B3 | predicted |
| CID323273    | CYP19A1 | predicted |
| CID23274265  | PDE4D   | predicted |
| CID5316837   | CA12    | predicted |
| CID2528      | NR1H4   | predicted |
| CID5281614   | USP2    | predicted |
| CID440735    | UGT1A3  | predicted |
| CID12302281  | NPC1    | predicted |
| CID10051276  | TNF     | predicted |
| CID12302289  | PTPN2   | predicted |
| CID12302290  | PTPN2   | predicted |
| CID11197650  | TP53    | predicted |
| CID5280653   | TP53    | predicted |
| CID11373178  | L3MBTL1 | predicted |
| CID11373177  | AKR1B10 | predicted |
| CID6440515   | AKR1B10 | predicted |
| CID5318717   | APEX1   | predicted |
| CID10004345  | NPC1    | predicted |
| CID9824100   | MAPK1   | predicted |
| CID6324916   | L3MBTL1 | predicted |
| CID84298     | L3MBTL1 | predicted |
| CID11962122  | CA9     | predicted |
| CID10842393  | CA1     | predicted |
| CID5281232   | KDM4E   | predicted |
| CID5281233   | CA9     | predicted |
| CID12315350  | CYP19A1 | predicted |
| CID6325021   | KMT2A   | predicted |
| CID102404034 | KDM4E   | predicted |
| CID21769778  | KDM4E   | predicted |
| CID5281780   | CA9     | predicted |
| CID5742692   | ACHE    | predicted |
| CID15480861  | NFKB1   | predicted |
| CID442667    | USP2    | predicted |
| CID5742694   | CTSV    | predicted |
| CID11372643  | TNF     | predicted |
| CID11418267  | KMT2A   | predicted |
| CID101675239 | NPSR1   | predicted |
| CID261859    | CYP1A1  | predicted |
| CID3008859   | NPC1    | predicted |
| CID101350248 | HSD11B1 | predicted |
| CID3082301   | TNF     | predicted |
| CID14077819  | PTGS1   | predicted |
| CID219100    | ESR2    | predicted |
| CID3008861   | NPC1    | predicted |
| CID21594154  | NPC1    | predicted |
| CID5742691   | RAB9A   | predicted |
| CID5742693   | CTSV    | predicted |
| CID10730594  | USP2    | predicted |
| CID11742062  | KMT2A   | predicted |
| CID10423983  | ACHE    | predicted |
| CID101040104 | ESR2    | predicted |
| CID101040105 | PTGS1   | predicted |
| CID10092871  | ABCG2   | predicted |
| CID10720420  | ACHE    | predicted |
| CID10532385  | EED     | predicted |
| CID10788255  | NPC1    | predicted |

|              |         |           |
|--------------|---------|-----------|
| CID101040112 | KDM4E   | predicted |
| CID74223810  | ABCB1   | predicted |
| CID101040113 | KDM4E   | predicted |
| CID101040110 | ESR2    | predicted |
| CID101040111 | MAPK1   | predicted |
| CID101040114 | TSHR    | predicted |
| CID101040115 | DRD1    | predicted |
| CID219592    | CYP3A4  | predicted |
| CID44257393  | ALOX15  | predicted |
| CID1738124   | TDP1    | predicted |
| CID101243871 | TNF     | predicted |
| CID16592     | CYP3A4  | predicted |
| CID5281675   | IL2     | predicted |
| CID5320582   | CYP19A1 | predicted |
| CID3008860   | GPR55   | predicted |
| CID442433    | KMT2A   | predicted |
| CID11948668  | CYP19A1 | predicted |
| CID3008858   | NPC1    | predicted |
| CID14378605  | CYP19A1 | predicted |
| CID73981590  | HSD11B1 | predicted |
| CID10787     | KDM4E   | predicted |
| CID5317532   | MAOA    | predicted |
| CID87730829  | CA14    | predicted |
| CID14523449  | NFKB1   | predicted |
| CID138753594 | CA9     | predicted |
| CID610933    | PTPN1   | predicted |
| CID70859637  | HTR2C   | predicted |
| CID3004155   | TP53    | predicted |
| CID53463561  | RAB9A   | predicted |
| CID13914606  | NPC1    | predicted |
| CID76551288  | GPBAR1  | predicted |
| CID5281152   | MMP1    | predicted |
| CID24814     | KCNH2   | predicted |
| CID100058    | TNF     | predicted |
| CID5316844   | LMNA    | predicted |
| CID10970376  | MAPK1   | predicted |
| CID9884033   | CYP2C19 | predicted |
| CID10741     | RAB9A   | predicted |
| CID10715291  | CA13    | predicted |
| CID44195972  | CTSV    | predicted |
| CID6122937   | MAPT    | predicted |
| CID138714873 | CA9     | predicted |
| CID4490286   | L3MBTL1 | predicted |
| CID387101196 | HIF1A   | predicted |
| CID45783213  | TP53    | predicted |
| CID45783214  | POLB    | predicted |
| CID1201518   | AKR1B10 | predicted |
| CID12445022  | ACHE    | predicted |
| CID8417      | CA12    | predicted |
| CID5280460   | CA5B    | predicted |
| CID5316647   | POLB    | predicted |
| CID5281792   | ALOX15  | predicted |
| CID196216    | ALOX15  | predicted |
| CID519954    | NPC1    | predicted |
| CID5322049   | POLB    | predicted |
| CID5322048   | ALOX15  | predicted |
| CID22559443  | PDE4D   | predicted |
| CID5281663   | SYK     | predicted |

|              |          |           |
|--------------|----------|-----------|
| CID296191    | NPC1     | predicted |
| CID68252     | PTPN1    | predicted |
| CID5372954   | KMT2A    | predicted |
| CID1549106   | SMN1     | predicted |
| CID145627453 | NPC1     | predicted |
| CID7424      | SERPINE1 | predicted |
| CID1309      | RAB9A    | predicted |
| CID5321869   | LMNA     | predicted |
| CID5321200   | ESR1     | predicted |
| CID4483044   | POLB     | predicted |
| CID49824629  | CYP19A1  | predicted |
| CID5321859   | MAOA     | predicted |
| CID3415719   | RAB9A    | predicted |
| CID5320471   | PTPN1    | predicted |
| CID5321865   | KDM4E    | predicted |
| CID71307292  | SMN1     | predicted |
| CID21155632  | SMN1     | predicted |
| CID547509    | TAAR1    | predicted |
| CID5322076   | CA9      | predicted |
| CID124211    | ACHE     | predicted |
| CID14135334  | TP53     | predicted |
| CID5321205   | KDM4E    | predicted |
| CID4961358   | GAA      | predicted |
| CID20763017  | ALDH1A1  | predicted |
| CID296119    | HSD11B1  | predicted |
| CID445858    | GLA      | predicted |
| CID22376357  | L3MBTL1  | predicted |
| CID119034    | NPC1     | predicted |
| CID6552009   | AKR1B10  | predicted |
| CID5284500   | CYP2C19  | predicted |
| CID12309393  | AKR1B10  | predicted |
| CID101761    | NPC1     | predicted |
| CID6973640   | AKR1B10  | predicted |
| CID6321405   | AKR1B10  | predicted |
| CID1567554   | CA7      | predicted |
| CID4220788   | AKR1B10  | predicted |
| CID20163303  | GPBAR1   | predicted |
| CID455809    | L3MBTL1  | predicted |
| CID3082025   | ACHE     | predicted |
| CID6365403   | PTGS2    | predicted |
| CID73648     | MAPK1    | predicted |
| CID8205      | RAB9A    | predicted |
| CID5320193   | CYP3A4   | predicted |
| CID338       | AR       | predicted |
| CID11095     | UGT1A3   | predicted |
| CID5320384   | HPGD     | predicted |
| CID22311     | GPBAR1   | predicted |
| CID26049     | TP53     | predicted |
| CID5282745   | CNR2     | predicted |
| CID6438157   | TP53     | predicted |
| CID274352    | CYP19A1  | predicted |
| CID5316834   | CA12     | predicted |
| CID5320475   | POLB     | predicted |
| CID5316833   | ACHE     | predicted |
| CID124869    | PPARG    | predicted |
| CID9816931   | ACHE     | predicted |
| CID49773122  | HTR2C    | predicted |
| CID402       | PTGS2    | predicted |

|             |         |           |
|-------------|---------|-----------|
| CID111446   | NPSR1   | predicted |
| CID15265    | FNTA    | predicted |
| CID5351506  | ALDH1A1 | predicted |
| CID5245     | RAB9A   | predicted |
| CID767      | RAB9A   | predicted |
| CID370      | MAPK1   | predicted |
| CID19009    | NFKB1   | predicted |
| CID2353     | THPO    | predicted |
| CID1115     | GAA     | predicted |
| CID4068592  | THPO    | predicted |
| CID14896    | SHBG    | predicted |
| CID6654     | ALDH1A1 | predicted |
| CID638011   | TP53    | predicted |
| CID521380   | MAPK1   | predicted |
| CID608886   | NPC1    | predicted |
| CID520159   | FABP3   | predicted |
| CID10997578 | KMT2A   | predicted |
| CID225      | ALOX5   | predicted |
| CID223578   | NPC1    | predicted |
| CID10168    | TTR     | predicted |
| CID5281607  | ABCC1   | predicted |
| CID5255901  | MAPK1   | predicted |
| CID471719   | CTSV    | predicted |
| CID5282747  | FNTA    | predicted |
| CID61545    | NT5E    | predicted |
| CID15241817 | NT5E    | predicted |
| CID91520    | CYP19A1 | predicted |
| CID11186895 | MTNR1B  | predicted |
| CID485077   | ALDH1A1 | predicted |
| CID89047    | TSHR    | predicted |
| CID12303797 | ACHE    | predicted |
| CID188516   | RAB9A   | predicted |
| CID5091219  | TNF     | predicted |
| CID5320211  | TAAR1   | predicted |
| CID2214     | CYP2C19 | predicted |
| CID289151   | TNF     | predicted |
| CID23990    | MAPK1   | predicted |
| CID2537     | BLM     | predicted |
| CID6054     | CYP2A13 | predicted |
| CID5280450  | TP53    | predicted |
| CID10465    | CYP3A4  | predicted |
| CID19725    | TP53    | predicted |
| CID445638   | NR1I2   | predicted |
| CID6989     | ACHE    | predicted |
| CID445070   | TRPV1   | predicted |
| CID12313332 | ALDH1A1 | predicted |
| CID379      | TBXAS1  | predicted |
| CID25240035 | SHBG    | predicted |
| CID5280666  | ABL1    | predicted |
| CID521215   | CNR1    | predicted |
| CID522266   | PRKCA   | predicted |
| CID136330   | MAPK1   | predicted |
| CID6782     | CA1     | predicted |
| CID19602    | CYP2A6  | predicted |
| CID445639   | ABCB11  | predicted |
| CID5385553  | MAPK1   | predicted |
| CID5283316  | NPC1    | predicted |
| CID10703    | TDP1    | predicted |

|              |         |           |
|--------------|---------|-----------|
| CID61041     | SLCO1B3 | predicted |
| CID519764    | RAB9A   | predicted |
| CID637511    | BLM     | predicted |
| CID10467     | CYP3A4  | predicted |
| CID11197     | CYP3A4  | predicted |
| CID23443619  | CASP1   | predicted |
| CID5246487   | HPGD    | predicted |
| CID5319551   | AKR1B10 | predicted |
| CID5280961   | ALOX15  | predicted |
| CID8215      | CYP3A4  | predicted |
| CID5281601   | CA2     | predicted |
| CID5317346   | CA1     | predicted |
| CID5315472   | KDM4E   | predicted |
| CID5281767   | CYP2C9  | predicted |
| CID14240392  | ALOX15  | predicted |
| CID5362828   | NPC1    | predicted |
| CID5280379   | KMT2A   | predicted |
| CID5281984   | HMGCR   | predicted |
| CID68352     | GSK3B   | predicted |
| CID108011    | PRKCA   | predicted |
| CID441643    | CA9     | predicted |
| CID25034024  | F10     | predicted |
| CID100938406 | CA9     | predicted |
| CID14367555  | MAPK1   | predicted |
| CID14633000  | TDP1    | predicted |
| CID5317598   | KMT2A   | predicted |
| CID154699541 | KMT2A   | predicted |
| CID11068834  | KMT2A   | predicted |
| CID5316208   | KMT2A   | predicted |
| CID45359845  | ESR2    | predicted |
| CID14543212  | MAPK1   | predicted |
| CID578234    | PPARG   | predicted |
| CID14191393  | RELA    | predicted |
| CID387977    | MAPK1   | predicted |
| CID3559861   | ALOX15  | predicted |
| CID42608153  | HSD11B1 | predicted |
| CID131751498 | NPC1    | predicted |
| CID101953463 | CYP2C19 | predicted |
| CID13347321  | HTR2B   | predicted |
| CID14191392  | PPARG   | predicted |
| CID10039429  | ABCG2   | predicted |
| CID13010829  | SMN1    | predicted |
| CID10017580  | APEX1   | predicted |
| CID13118283  | CYP19A1 | predicted |
| CID131752799 | KDM4E   | predicted |
| CID14543213  | KMT2A   | predicted |
| CID14632997  | TDP1    | predicted |
| CID14543199  | MAPK1   | predicted |
| CID11795     | KMT2A   | predicted |
| CID68073     | CYP1A1  | predicted |
| CID1550936   | CA9     | predicted |
| CID12314812  | PTGES   | predicted |
| CID14543235  | TNF     | predicted |
| CID9906039   | RAB9A   | predicted |
| CID13347322  | ACHE    | predicted |
| CID131752986 | MAPK1   | predicted |
| CID57509469  | CA9     | predicted |
| CID75144776  | ALOX5   | predicted |

|              |          |           |
|--------------|----------|-----------|
| CID147446684 | NPSR1    | predicted |
| CID536436    | MAPK1    | predicted |
| CID10797750  | MAPK1    | predicted |
| CID5312418   | OXER1    | predicted |
| CID5282751   | OXER1    | predicted |
| CID78178011  | MPEG1    | predicted |
| CID71363803  | SHBG     | predicted |
| CID14107524  | TDP1     | predicted |
| CID131752987 | MAPK1    | predicted |
| CID14632996  | MAPK1    | predicted |
| CID13967857  | ALOX15   | predicted |
| CID519762    | MPEG1    | predicted |
| CID14287395  | ACHE     | predicted |
| CID90476927  | TRPA1    | predicted |
| CID637429    | HSD17B10 | predicted |
| CID57509470  | MAPK1    | predicted |
| CID14632994  | HSD11B1  | predicted |
| CID78171602  | ACHE     | predicted |
| CID5469424   | NPC1     | predicted |
| CID14543197  | ACHE     | predicted |
| CID15858385  | CNR1     | predicted |
| CID14633011  | ACHE     | predicted |
| CID10955433  | RAB9A    | predicted |
| CID5324473   | PPARG    | predicted |
| CID44629981  | RAB9A    | predicted |
| CID49777919  | CYP3A4   | predicted |
| CID14367556  | MAPK1    | predicted |
| CID626934    | USP2     | predicted |
| CID969516    | CYP2C9   | predicted |
| CID6115      | ALDH1A1  | predicted |
| CID5324476   | HSD17B10 | predicted |
| CID5322095   | RAB9A    | predicted |
| CID101682279 | PTPN2    | predicted |
| CID161686    | SLCO1B1  | predicted |
| CID323273    | KMT2A    | predicted |
| CID23274265  | CNR2     | predicted |
| CID5316837   | MAPK1    | predicted |
| CID2528      | DRD4     | predicted |
| CID5281614   | BACE1    | predicted |
| CID440735    | NPC1     | predicted |
| CID12302281  | TDP1     | predicted |
| CID10051276  | TP53     | predicted |
| CID12302289  | SLCO1B3  | predicted |
| CID12302290  | SLCO1B3  | predicted |
| CID11197650  | AKR1B10  | predicted |
| CID5280653   | AKR1B10  | predicted |
| CID11373178  | CA9      | predicted |
| CID11373177  | TP53     | predicted |
| CID6440515   | TP53     | predicted |
| CID5318717   | MAOA     | predicted |
| CID10004345  | TDP1     | predicted |
| CID9824100   | ACHE     | predicted |
| CID6324916   | CYP19A1  | predicted |
| CID84298     | HTT      | predicted |
| CID11962122  | ABCG2    | predicted |
| CID10842393  | POLB     | predicted |
| CID5281232   | NPC1     | predicted |
| CID5281233   | TP53     | predicted |

|              |         |           |
|--------------|---------|-----------|
| CID12315350  | KMT2A   | predicted |
| CID6325021   | CYP19A1 | predicted |
| CID102404034 | NFKB1   | predicted |
| CID21769778  | NFKB1   | predicted |
| CID5281780   | NFKB1   | predicted |
| CID5742692   | LMNA    | predicted |
| CID15480861  | ALDH1A1 | predicted |
| CID442667    | HIF1A   | predicted |
| CID5742694   | CA9     | predicted |
| CID11372643  | CYP19A1 | predicted |
| CID11418267  | POLB    | predicted |
| CID101675239 | CA1     | predicted |
| CID261859    | AR      | predicted |
| CID3008859   | TDP1    | predicted |
| CID101350248 | CYP19A1 | predicted |
| CID3082301   | CYP19A1 | predicted |
| CID14077819  | KMT2A   | predicted |
| CID219100    | ESR1    | predicted |
| CID3008861   | PRKCA   | predicted |
| CID21594154  | TDP1    | predicted |
| CID5742691   | CTSV    | predicted |
| CID5742693   | CA9     | predicted |
| CID10730594  | ACHE    | predicted |
| CID11742062  | TDP1    | predicted |
| CID10423983  | TSHR    | predicted |
| CID101040104 | MAOA    | predicted |
| CID101040105 | TDP1    | predicted |
| CID10092871  | KMT2A   | predicted |
| CID10720420  | TYR     | predicted |
| CID10532385  | KMT2A   | predicted |
| CID10788255  | TDP1    | predicted |
| CID101040112 | ALDH1A1 | predicted |
| CID74223810  | NPC1    | predicted |
| CID101040113 | ALDH1A1 | predicted |
| CID101040110 | TSHR    | predicted |
| CID101040111 | TSHR    | predicted |
| CID101040114 | TP53    | predicted |
| CID101040115 | MAOA    | predicted |
| CID219592    | MAOA    | predicted |
| CID44257393  | ESR1    | predicted |
| CID1738124   | RAB9A   | predicted |
| CID101243871 | CYP19A1 | predicted |
| CID16592     | NR1I2   | predicted |
| CID5281675   | GAA     | predicted |
| CID5320582   | POLB    | predicted |
| CID3008860   | S1PR1   | predicted |
| CID442433    | CYP19A1 | predicted |
| CID11948668  | POLB    | predicted |
| CID3008858   | NPSR1   | predicted |
| CID14378605  | POLB    | predicted |
| CID73981590  | CYP19A1 | predicted |
| CID10787     | CA14    | predicted |
| CID5317532   | KMT2A   | predicted |
| CID87730829  | CA7     | predicted |
| CID14523449  | MAN2B1  | predicted |
| CID138753594 | TP53    | predicted |
| CID610933    | PDE4D   | predicted |
| CID70859637  | PTPN1   | predicted |



|              |          |           |
|--------------|----------|-----------|
| CID3004155   | TNF      | predicted |
| CID53463561  | TAAR1    | predicted |
| CID13914606  | TDP1     | predicted |
| CID76551288  | HSP90AA1 | predicted |
| CID5281152   | RAB9A    | predicted |
| CID24814     | MAOA     | predicted |
| CID100058    | CYP19A1  | predicted |
| CID5316844   | SMN1     | predicted |
| CID10970376  | TP53     | predicted |
| CID9884033   | CYP1B1   | predicted |
| CID10741     | ODC1     | predicted |
| CID10715291  | TDP1     | predicted |
| CID44195972  | TP53     | predicted |
| CID6122937   | ALDH1A1  | predicted |
| CID138714873 | TP53     | predicted |
| CID4490286   | MAPK1    | predicted |
| CID387101196 | MAPK1    | predicted |
| CID45783213  | TNF      | predicted |
| CID45783214  | AKR1B10  | predicted |
| CID1201518   | SLCO1B3  | predicted |
| CID12445022  | ALOX5    | predicted |
| CID8417      | SMN1     | predicted |
| CID5280460   | POLB     | predicted |
| CID5316647   | CA9      | predicted |
| CID5281792   | PTPN1    | predicted |
| CID196216    | TNF      | predicted |
| CID519954    | ALOX5    | predicted |
| CID5322049   | KMT2A    | predicted |
| CID5322048   | RECQL    | predicted |
| CID22559443  | CNR2     | predicted |
| CID5281663   | ABCG2    | predicted |
| CID296191    | SLCO1B1  | predicted |
| CID68252     | SMN1     | predicted |
| CID5372954   | CA12     | predicted |
| CID1549106   | ABCG2    | predicted |
| CID145627453 | TDP1     | predicted |
| CID7424      | KDM4E    | predicted |
| CID1309      | MAPK1    | predicted |
| CID5321869   | TDP1     | predicted |
| CID5321200   | KDM4E    | predicted |
| CID4483044   | L3MBTL1  | predicted |
| CID49824629  | ALDH1A1  | predicted |
| CID5321859   | CA1      | predicted |
| CID3415719   | MAPK1    | predicted |
| CID5320471   | TDP1     | predicted |
| CID5321865   | TDP1     | predicted |
| CID71307292  | APEX1    | predicted |
| CID21155632  | CYP2C19  | predicted |
| CID547509    | DRD2     | predicted |
| CID5322076   | KDM4E    | predicted |
| CID124211    | TP53     | predicted |
| CID14135334  | CYP19A1  | predicted |
| CID5321205   | TDP1     | predicted |
| CID4961358   | ESR1     | predicted |
| CID20763017  | TP53     | predicted |
| CID296119    | POLB     | predicted |
| CID445858    | THPO     | predicted |
| CID22376357  | ALDH1A1  | predicted |

|             |          |           |
|-------------|----------|-----------|
| CID119034   | SLCO1B1  | predicted |
| CID6552009  | SLCO1B3  | predicted |
| CID5284500  | BLM      | predicted |
| CID12309393 | TDP1     | predicted |
| CID101761   | TDP1     | predicted |
| CID6973640  | SLCO1B3  | predicted |
| CID6321405  | SLCO1B3  | predicted |
| CID1567554  | CNR1     | predicted |
| CID4220788  | ACHE     | predicted |
| CID20163303 | CNR2     | predicted |
| CID455809   | ABCG2    | predicted |
| CID3082025  | NPSR1    | predicted |
| CID6365403  | HTR6     | predicted |
| CID73648    | TP53     | predicted |
| CID8205     | MAPK1    | predicted |
| CID5320193  | FABP3    | predicted |
| CID338      | TDP1     | predicted |
| CID11095    | NPC1     | predicted |
| CID5320384  | RAB9A    | predicted |
| CID22311    | CNR2     | predicted |
| CID26049    | SLCO1B1  | predicted |
| CID5282745  | CNR1     | predicted |
| CID6438157  | FNTA     | predicted |
| CID274352   | TAAR1    | predicted |
| CID5316834  | BACE1    | predicted |
| CID5320475  | LMNA     | predicted |
| CID5316833  | ODC1     | predicted |
| CID124869   | HPGD     | predicted |
| CID9816931  | PTPN1    | predicted |
| CID49773122 | CYP2C19  | predicted |
| CID402      | HTR6     | predicted |
| CID111446   | ESR2     | predicted |
| CID15265    | PPARD    | predicted |
| CID5351506  | HSP90AA1 | predicted |
| CID5245     | SIRT3    | predicted |
| CID767      | HSD17B10 | predicted |
| CID370      | POLB     | predicted |
| CID19009    | ALOX15   | predicted |
| CID2353     | TSHR     | predicted |
| CID1115     | PTPN1    | predicted |
| CID4068592  | NPSR1    | predicted |
| CID14896    | ACHE     | predicted |
| CID6654     | TDP1     | predicted |
| CID638011   | NPC1     | predicted |
| CID521380   | CNR2     | predicted |
| CID608886   | TDP1     | predicted |
| CID520159   | MAPK1    | predicted |
| CID10997578 | MAPK1    | predicted |
| CID225      | SLCO1B1  | predicted |
| CID223578   | KMT2A    | predicted |
| CID10168    | CYP2C9   | predicted |
| CID5281607  | LMNA     | predicted |
| CID5255901  | HSD11B1  | predicted |
| CID471719   | CYP2C19  | predicted |
| CID5282747  | PPARA    | predicted |
| CID61545    | HPGD     | predicted |
| CID15241817 | HPGD     | predicted |
| CID91520    | TP53     | predicted |

|              |          |           |
|--------------|----------|-----------|
| CID11186895  | HTR1B    | predicted |
| CID485077    | MAOA     | predicted |
| CID89047     | CDK2     | predicted |
| CID12303797  | KDM4E    | predicted |
| CID188516    | ALDH1A1  | predicted |
| CID5091219   | NPSR1    | predicted |
| CID5320211   | DRD4     | predicted |
| CID2214      | SMN1     | predicted |
| CID289151    | SLCO1B3  | predicted |
| CID23990     | PPARG    | predicted |
| CID2537      | GAA      | predicted |
| CID6054      | HTR1F    | predicted |
| CID5280450   | SLCO1B1  | predicted |
| CID10465     | TDP1     | predicted |
| CID19725     | TDP1     | predicted |
| CID445638    | RECQL    | predicted |
| CID6989      | HIF1A    | predicted |
| CID445070    | NQO1     | predicted |
| CID12313332  | IL2      | predicted |
| CID379       | MAPK1    | predicted |
| CID25240035  | SMN1     | predicted |
| CID5280666   | PRKDC    | predicted |
| CID521215    | SHBG     | predicted |
| CID522266    | KMT2A    | predicted |
| CID136330    | SHBG     | predicted |
| CID6782      | CYP19A1  | predicted |
| CID19602     | PPARG    | predicted |
| CID445639    | APAF1    | predicted |
| CID5385553   | HSP90AA1 | predicted |
| CID5283316   | MAPK1    | predicted |
| CID10703     | MAPK1    | predicted |
| CID61041     | HSD11B1  | predicted |
| CID519764    | TP53     | predicted |
| CID637511    | KMT2A    | predicted |
| CID10467     | TDP1     | predicted |
| CID11197     | TDP1     | predicted |
| CID23443619  | THPO     | predicted |
| CID5246487   | ALDH1A1  | predicted |
| CID5319551   | MAPK1    | predicted |
| CID5280961   | ALDH1A1  | predicted |
| CID8215      | TDP1     | predicted |
| CID5281601   | KDM4E    | predicted |
| CID5317346   | NFKB1    | predicted |
| CID5315472   | NPC1     | predicted |
| CID5281767   | NPC1     | predicted |
| CID14240392  | ACHE     | predicted |
| CID5362828   | ALOX15   | predicted |
| CID5280379   | HMGCR    | predicted |
| CID5281984   | KMT2A    | predicted |
| CID68352     | PPARG    | predicted |
| CID108011    | TOP1     | predicted |
| CID441643    | PRKCA    | predicted |
| CID25034024  | TP53     | predicted |
| CID100938406 | TP53     | predicted |
| CID14367555  | NPC1     | predicted |
| CID14633000  | ACHE     | predicted |
| CID5317598   | NPC1     | predicted |
| CID154699541 | TP53     | predicted |

|              |          |           |
|--------------|----------|-----------|
| CID11068834  | TP53     | predicted |
| CID5316208   | ACHE     | predicted |
| CID45359845  | ALDH1A1  | predicted |
| CID14543212  | TRPV1    | predicted |
| CID578234    | NFKB1    | predicted |
| CID14191393  | GPBAR1   | predicted |
| CID387977    | HSD11B1  | predicted |
| CID3559861   | ACHE     | predicted |
| CID42608153  | NPC1     | predicted |
| CID131751498 | ABCG2    | predicted |
| CID101953463 | MAPK1    | predicted |
| CID13347321  | MAPK1    | predicted |
| CID14191392  | ACHE     | predicted |
| CID10039429  | PPARG    | predicted |
| CID13010829  | ABCG2    | predicted |
| CID10017580  | ABCG2    | predicted |
| CID13118283  | ESR2     | predicted |
| CID131752799 | KMT2A    | predicted |
| CID14543213  | GPBAR1   | predicted |
| CID14632997  | ACHE     | predicted |
| CID14543199  | SHBG     | predicted |
| CID11795     | DNMT1    | predicted |
| CID68073     | CYP1A2   | predicted |
| CID1550936   | HSD17B10 | predicted |
| CID12314812  | PTPRC    | predicted |
| CID14543235  | AKR1B10  | predicted |
| CID9906039   | ESR1     | predicted |
| CID13347322  | ABCG2    | predicted |
| CID131752986 | MAOA     | predicted |
| CID57509469  | XBP1     | predicted |
| CID75144776  | ALOX15   | predicted |
| CID147446684 | GPBAR1   | predicted |
| CID536436    | PPARG    | predicted |
| CID10797750  | NPSR1    | predicted |
| CID5312418   | TDP1     | predicted |
| CID5282751   | TDP1     | predicted |
| CID78178011  | NPSR1    | predicted |
| CID71363803  | ESR1     | predicted |
| CID14107524  | TRPA1    | predicted |
| CID131752987 | CA12     | predicted |
| CID14632996  | ABCG2    | predicted |
| CID13967857  | HSD11B1  | predicted |
| CID519762    | NPC1     | predicted |
| CID14287395  | ALOX15   | predicted |
| CID90476927  | RAB9A    | predicted |
| CID637429    | CA12     | predicted |
| CID57509470  | PPARG    | predicted |
| CID14632994  | RAB9A    | predicted |
| CID78171602  | MAPK1    | predicted |
| CID5469424   | PTPN1    | predicted |
| CID14543197  | TNF      | predicted |
| CID15858385  | RAB9A    | predicted |
| CID14633011  | TP53     | predicted |
| CID10955433  | MAPK1    | predicted |
| CID5324473   | CA1      | predicted |
| CID44629981  | KDM4E    | predicted |
| CID49777919  | KMT2A    | predicted |
| CID14367556  | NPC1     | predicted |

|              |         |           |
|--------------|---------|-----------|
| CID626934    | TSHR    | predicted |
| CID969516    | NPC1    | predicted |
| CID61115     | NPSR1   | predicted |
| CID5324476   | SMN1    | predicted |
| CID5322095   | KMT2A   | predicted |
| CID101682279 | TP53    | predicted |
| CID161686    | IL2     | predicted |
| CID323273    | GPBAR1  | predicted |
| CID23274265  | ALOX15  | predicted |
| CID5316837   | TP53    | predicted |
| CID2528      | DRD2    | predicted |
| CID5281614   | NOX4    | predicted |
| CID440735    | CBR1    | predicted |
| CID12302281  | TP53    | predicted |
| CID10051276  | PTPN2   | predicted |
| CID12302289  | SLCO1B1 | predicted |
| CID12302290  | SLCO1B1 | predicted |
| CID11197650  | CA9     | predicted |
| CID5280653   | CA9     | predicted |
| CID11373178  | CYP19A1 | predicted |
| CID11373177  | CA9     | predicted |
| CID6440515   | CA9     | predicted |
| CID5318717   | CDK5R1  | predicted |
| CID10004345  | TP53    | predicted |
| CID9824100   | MAOA    | predicted |
| CID6324916   | MAPK1   | predicted |
| CID84298     | TNF     | predicted |
| CID11962122  | BACE1   | predicted |
| CID10842393  | CA9     | predicted |
| CID5281232   | MAPK1   | predicted |
| CID5281233   | APEX1   | predicted |
| CID12315350  | GPBAR1  | predicted |
| CID6325021   | CA1     | predicted |
| CID102404034 | CA9     | predicted |
| CID21769778  | CA9     | predicted |
| CID5281780   | CA1     | predicted |
| CID5742692   | CA9     | predicted |
| CID15480861  | PTPRC   | predicted |
| CID442667    | ACHE    | predicted |
| CID5742694   | TP53    | predicted |
| CID11372643  | CA1     | predicted |
| CID11418267  | HSD11B1 | predicted |
| CID101675239 | HSD11B1 | predicted |
| CID261859    | CYP1A2  | predicted |
| CID3008859   | PRKCA   | predicted |
| CID101350248 | ALDH1A1 | predicted |
| CID3082301   | CA1     | predicted |
| CID14077819  | BACE1   | predicted |
| CID219100    | SMN1    | predicted |
| CID3008861   | TDP1    | predicted |
| CID21594154  | TP53    | predicted |
| CID5742691   | CA1     | predicted |
| CID5742693   | TP53    | predicted |
| CID10730594  | BACE1   | predicted |
| CID11742062  | CYP19A1 | predicted |
| CID10423983  | USP2    | predicted |
| CID101040104 | ALOX15  | predicted |
| CID101040105 | CYP19A1 | predicted |

|              |         |           |
|--------------|---------|-----------|
| CID10092871  | CYP2A6  | predicted |
| CID10720420  | LMNA    | predicted |
| CID10532385  | TDP1    | predicted |
| CID10788255  | RAB9A   | predicted |
| CID101040112 | TP53    | predicted |
| CID74223810  | TSHR    | predicted |
| CID101040113 | TP53    | predicted |
| CID101040110 | MAPK1   | predicted |
| CID101040111 | PPARG   | predicted |
| CID101040114 | KDM4E   | predicted |
| CID101040115 | KMT2A   | predicted |
| CID219592    | ABCG2   | predicted |
| CID44257393  | ODC1    | predicted |
| CID1738124   | PTGIR   | predicted |
| CID101243871 | CA1     | predicted |
| CID16592     | KMT2A   | predicted |
| CID5281675   | KMT2A   | predicted |
| CID5320582   | AKR1B10 | predicted |
| CID3008860   | NPC1    | predicted |
| CID442433    | CA1     | predicted |
| CID11948668  | KMT2A   | predicted |
| CID3008858   | ESR1    | predicted |
| CID14378605  | KMT2A   | predicted |
| CID73981590  | ALDH1A1 | predicted |
| CID10787     | PTPN1   | predicted |
| CID5317532   | HTR1A   | predicted |
| CID87730829  | ALDH1A1 | predicted |
| CID14523449  | MAPK1   | predicted |
| CID138753594 | APEX1   | predicted |
| CID610933    | TP53    | predicted |
| CID70859637  | CYP2C19 | predicted |
| CID3004155   | NFKB1   | predicted |
| CID53463561  | TDP1    | predicted |
| CID13914606  | PRKCA   | predicted |
| CID76551288  | ALDH1A1 | predicted |
| CID5281152   | NPC1    | predicted |
| CID24814     | PRNP    | predicted |
| CID100058    | CA1     | predicted |
| CID5316844   | ALOX15  | predicted |
| CID10970376  | LMNA    | predicted |
| CID9884033   | POLB    | predicted |
| CID10741     | ALOX15  | predicted |
| CID10715291  | ACHE    | predicted |
| CID44195972  | TSHR    | predicted |
| CID6122937   | SMN1    | predicted |
| CID138714873 | APEX1   | predicted |
| CID4490286   | CA9     | predicted |
| CID387101196 | ABCG2   | predicted |
| CID45783213  | KDM4E   | predicted |
| CID45783214  | CYP19A1 | predicted |
| CID1201518   | ESR1    | predicted |
| CID12445022  | ALOX15  | predicted |
| CID8417      | CYP2C19 | predicted |
| CID5280460   | HIF1A   | predicted |
| CID5316647   | NFKB1   | predicted |
| CID5281792   | MMP12   | predicted |
| CID196216    | MAPK1   | predicted |
| CID519954    | PPARG   | predicted |

|              |          |           |
|--------------|----------|-----------|
| CID5322049   | SMN1     | predicted |
| CID5322048   | POLB     | predicted |
| CID22559443  | ODC1     | predicted |
| CID5281663   | KARS     | predicted |
| CID296191    | KMT2A    | predicted |
| CID68252     | PTGS1    | predicted |
| CID5372954   | AKR1B1   | predicted |
| CID1549106   | CA12     | predicted |
| CID145627453 | TP53     | predicted |
| CID7424      | CYP3A4   | predicted |
| CID1309      | NPC1     | predicted |
| CID5321869   | HPGD     | predicted |
| CID5321200   | TSHR     | predicted |
| CID4483044   | AKR1B10  | predicted |
| CID49824629  | HSP90AA1 | predicted |
| CID5321859   | MAPK1    | predicted |
| CID3415719   | SMN1     | predicted |
| CID5320471   | ACHE     | predicted |
| CID5321865   | LMNA     | predicted |
| CID71307292  | CYP2C19  | predicted |
| CID21155632  | TSHR     | predicted |
| CID547509    | TDP1     | predicted |
| CID5322076   | KMT2A    | predicted |
| CID124211    | LMNA     | predicted |
| CID14135334  | ALDH1A1  | predicted |
| CID5321205   | CA2      | predicted |
| CID4961358   | ACHE     | predicted |
| CID20763017  | TDP1     | predicted |
| CID296119    | SHBG     | predicted |
| CID445858    | MB       | predicted |
| CID22376357  | TRPA1    | predicted |
| CID119034    | KMT2A    | predicted |
| CID6552009   | ESR1     | predicted |
| CID5284500   | GAA      | predicted |
| CID12309393  | MAPK1    | predicted |
| CID101761    | TP53     | predicted |
| CID6973640   | ESR1     | predicted |
| CID6321405   | ESR1     | predicted |
| CID1567554   | SMN1     | predicted |
| CID4220788   | BCHE     | predicted |
| CID20163303  | NPC1     | predicted |
| CID455809    | KDM4E    | predicted |
| CID3082025   | BACE1    | predicted |
| CID6365403   | ALOX15   | predicted |
| CID73648     | CTSV     | predicted |
| CID8205      | PTPN1    | predicted |
| CID5320193   | CNR1     | predicted |
| CID338       | CYP3A4   | predicted |
| CID11095     | CBR1     | predicted |
| CID5320384   | NPC1     | predicted |
| CID22311     | BCHE     | predicted |
| CID26049     | ESR1     | predicted |
| CID5282745   | ALDH1A1  | predicted |
| CID6438157   | PPARA    | predicted |
| CID274352    | PTPN1    | predicted |
| CID5316834   | ABCB1    | predicted |
| CID5320475   | TP53     | predicted |
| CID5316833   | LMNA     | predicted |

|             |          |           |
|-------------|----------|-----------|
| CID124869   | ESR1     | predicted |
| CID9816931  | POLB     | predicted |
| CID49773122 | HTT      | predicted |
| CID402      | ALOX15   | predicted |
| CID111446   | AKR1B10  | predicted |
| CID15265    | PTPN1    | predicted |
| CID5351506  | CYP19A1  | predicted |
| CID5245     | NPC1     | predicted |
| CID767      | CYP19A1  | predicted |
| CID370      | RAB9A    | predicted |
| CID19009    | THPO     | predicted |
| CID2353     | MAPK1    | predicted |
| CID1115     | CYP19A1  | predicted |
| CID4068592  | L3MBTL1  | predicted |
| CID14896    | NPC1     | predicted |
| CID6654     | SHBG     | predicted |
| CID638011   | TRPA1    | predicted |
| CID521380   | ALOX5    | predicted |
| CID608886   | TP53     | predicted |
| CID520159   | CYP19A1  | predicted |
| CID10997578 | KDM4E    | predicted |
| CID225      | TDP1     | predicted |
| CID223578   | HSD11B2  | predicted |
| CID10168    | THPO     | predicted |
| CID5281607  | RAB9A    | predicted |
| CID5255901  | HTT      | predicted |
| CID471719   | ALOX15   | predicted |
| CID5282747  | FABP3    | predicted |
| CID61545    | HSD17B10 | predicted |
| CID15241817 | HSD17B10 | predicted |
| CID91520    | GAA      | predicted |
| CID11186895 | HTR2B    | predicted |
| CID485077   | DRD2     | predicted |
| CID89047    | KDM4E    | predicted |
| CID12303797 | ABCG2    | predicted |
| CID188516   | MCL1     | predicted |
| CID5091219  | HTT      | predicted |
| CID5320211  | HTR1A    | predicted |
| CID2214     | HSD17B10 | predicted |
| CID289151   | SLCO1B1  | predicted |
| CID23990    | NPC1     | predicted |
| CID2537     | THRB     | predicted |
| CID6054     | DOP2R    | predicted |
| CID5280450  | ALOX12   | predicted |
| CID10465    | NFKB1    | predicted |
| CID19725    | XBP1     | predicted |
| CID445638   | MAOB     | predicted |
| CID6989     | NPC1     | predicted |
| CID445070   | CA7      | predicted |
| CID12313332 | L3MBTL1  | predicted |
| CID379      | ACHE     | predicted |
| CID25240035 | ACHE     | predicted |
| CID5280666  | NOX4     | predicted |
| CID521215   | SLCO1B1  | predicted |
| CID522266   | HTT      | predicted |
| CID136330   | MPEG1    | predicted |
| CID6782     | CA9      | predicted |
| CID19602    | PTPN1    | predicted |



|              |          |           |
|--------------|----------|-----------|
| CID445639    | HSD17B10 | predicted |
| CID5385553   | PTPN1    | predicted |
| CID5283316   | HMGCR    | predicted |
| CID10703     | CYP19A1  | predicted |
| CID61041     | ALOX5    | predicted |
| CID519764    | CNR1     | predicted |
| CID637511    | PTGS1    | predicted |
| CID10467     | NFKB1    | predicted |
| CID11197     | NFKB1    | predicted |
| CID23443619  | KMT2A    | predicted |
| CID5246487   | GAA      | predicted |
| CID5319551   | ALDH1A1  | predicted |
| CID5280961   | KMT2A    | predicted |
| CID8215      | NFKB1    | predicted |
| CID5281601   | LMNA     | predicted |
| CID5317346   | MAPK1    | predicted |
| CID5315472   | NPSR1    | predicted |
| CID5281767   | L3MBTL1  | predicted |
| CID14240392  | SHBG     | predicted |
| CID5362828   | ACHE     | predicted |
| CID5280379   | HSP90AA1 | predicted |
| CID5281984   | NFKB1    | predicted |
| CID68352     | MAPK1    | predicted |
| CID108011    | CA9      | predicted |
| CID441643    | PSIP1    | predicted |
| CID25034024  | PRKCA    | predicted |
| CID100938406 | MAPK1    | predicted |
| CID14367555  | TP53     | predicted |
| CID14633000  | HTT      | predicted |
| CID5317598   | ALOX15   | predicted |
| CID154699541 | HSD17B10 | predicted |
| CID11068834  | CYP2C19  | predicted |
| CID5316208   | ESR2     | predicted |
| CID45359845  | EED      | predicted |
| CID14543212  | ALOX15   | predicted |
| CID578234    | CYP19A1  | predicted |
| CID14191393  | TP53     | predicted |
| CID387977    | HTT      | predicted |
| CID3559861   | SHBG     | predicted |
| CID42608153  | ACHE     | predicted |
| CID131751498 | ALOX15   | predicted |
| CID101953463 | POLB     | predicted |
| CID13347321  | NPC1     | predicted |
| CID14191392  | NPC1     | predicted |
| CID10039429  | MAPK1    | predicted |
| CID13010829  | AKR1B1   | predicted |
| CID10017580  | BACE1    | predicted |
| CID13118283  | EED      | predicted |
| CID131752799 | SLCO2B1  | predicted |
| CID14543213  | ACHE     | predicted |
| CID14632997  | HTT      | predicted |
| CID14543199  | PPARG    | predicted |
| CID11795     | KIF11    | predicted |
| CID68073     | KMT2A    | predicted |
| CID1550936   | CA12     | predicted |
| CID12314812  | KMT2A    | predicted |
| CID14543235  | ACHE     | predicted |
| CID9906039   | KDM4E    | predicted |

|              |         |           |
|--------------|---------|-----------|
| CID13347322  | BACE1   | predicted |
| CID131752986 | ACHE    | predicted |
| CID57509469  | ACHE    | predicted |
| CID75144776  | EED     | predicted |
| CID147446684 | XBP1    | predicted |
| CID536436    | ABCG2   | predicted |
| CID10797750  | ALOX15  | predicted |
| CID5312418   | FNTA    | predicted |
| CID5282751   | FNTA    | predicted |
| CID78178011  | KMT2A   | predicted |
| CID71363803  | ALDH1A1 | predicted |
| CID14107524  | NQO2    | predicted |
| CID131752987 | ALOX15  | predicted |
| CID14632996  | TNF     | predicted |
| CID13967857  | TP53    | predicted |
| CID519762    | TDP1    | predicted |
| CID14287395  | TP53    | predicted |
| CID90476927  | PTPN1   | predicted |
| CID637429    | PTPN1   | predicted |
| CID57509470  | TP53    | predicted |
| CID14632994  | MPEG1   | predicted |
| CID78171602  | ABCG2   | predicted |
| CID5469424   | ACHE    | predicted |
| CID14543197  | MAPK1   | predicted |
| CID15858385  | MAPK1   | predicted |
| CID14633011  | HTT     | predicted |
| CID10955433  | KMT2A   | predicted |
| CID5324473   | CA12    | predicted |
| CID44629981  | PTPN1   | predicted |
| CID49777919  | CYP19A1 | predicted |
| CID14367556  | TP53    | predicted |
| CID626934    | HTR1A   | predicted |
| CID969516    | L3MBTL1 | predicted |
| CID6115      | CYP1A2  | predicted |
| CID5324476   | CA12    | predicted |
| CID5322095   | CNR2    | predicted |
| CID101682279 | KMT2A   | predicted |
| CID161686    | AKR1B1  | predicted |
| CID323273    | HSD11B1 | predicted |
| CID23274265  | ODC1    | predicted |
| CID5316837   | ODC1    | predicted |
| CID2528      | MAPT    | predicted |
| CID5281614   | SMN1    | predicted |
| CID440735    | RAB9A   | predicted |
| CID12302281  | MAPK1   | predicted |
| CID10051276  | ALDH1A1 | predicted |
| CID12302289  | MAPK1   | predicted |
| CID12302290  | MAPK1   | predicted |
| CID11197650  | PTPN1   | predicted |
| CID5280653   | PTPN1   | predicted |
| CID11373178  | IL2     | predicted |
| CID11373177  | PRKCA   | predicted |
| CID6440515   | PRKCA   | predicted |
| CID5318717   | KDM4E   | predicted |
| CID10004345  | MAPK1   | predicted |
| CID9824100   | GAA     | predicted |
| CID6324916   | CA9     | predicted |
| CID84298     | CYP19A1 | predicted |

|              |         |           |
|--------------|---------|-----------|
| CID11962122  | CA1     | predicted |
| CID10842393  | L3MBTL1 | predicted |
| CID5281232   | PPARG   | predicted |
| CID5281233   | PRKCA   | predicted |
| CID12315350  | HSD11B1 | predicted |
| CID6325021   | HSD11B1 | predicted |
| CID102404034 | CA1     | predicted |
| CID21769778  | CA1     | predicted |
| CID5281780   | POLB    | predicted |
| CID5742692   | TP53    | predicted |
| CID15480861  | PDE4B   | predicted |
| CID442667    | CYP19A1 | predicted |
| CID5742694   | LMNA    | predicted |
| CID11372643  | CA9     | predicted |
| CID11418267  | CYP19A1 | predicted |
| CID101675239 | CA9     | predicted |
| CID261859    | KMT2A   | predicted |
| CID3008859   | ALOX5   | predicted |
| CID101350248 | AKR1B10 | predicted |
| CID3082301   | CA9     | predicted |
| CID14077819  | ALOX15  | predicted |
| CID219100    | CA9     | predicted |
| CID3008861   | ESR1    | predicted |
| CID21594154  | MAPK1   | predicted |
| CID5742691   | ODC1    | predicted |
| CID5742693   | LMNA    | predicted |
| CID10730594  | PTGS1   | predicted |
| CID11742062  | PLA2G1B | predicted |
| CID10423983  | BACE1   | predicted |
| CID101040104 | CA9     | predicted |
| CID101040105 | KDM4E   | predicted |
| CID10092871  | PLA2G1B | predicted |
| CID10720420  | MAOA    | predicted |
| CID10532385  | NPC1    | predicted |
| CID10788255  | ALOX5   | predicted |
| CID101040112 | ALOX15  | predicted |
| CID74223810  | TP53    | predicted |
| CID101040113 | ALOX15  | predicted |
| CID101040110 | TP53    | predicted |
| CID101040111 | KDM4E   | predicted |
| CID101040114 | ACHE    | predicted |
| CID101040115 | CYP2C19 | predicted |
| CID219592    | ESR1    | predicted |
| CID44257393  | PDE4D   | predicted |
| CID1738124   | FAAH    | predicted |
| CID101243871 | CA9     | predicted |
| CID16592     | SAE1    | predicted |
| CID5281675   | ALOX15  | predicted |
| CID5320582   | ALDH1A1 | predicted |
| CID3008860   | HTT     | predicted |
| CID442433    | HSD11B1 | predicted |
| CID11948668  | ALDH1A1 | predicted |
| CID3008858   | ALDH1A1 | predicted |
| CID14378605  | ALDH1A1 | predicted |
| CID73981590  | AKR1B10 | predicted |
| CID10787     | EGFR    | predicted |
| CID5317532   | CA5B    | predicted |
| CID87730829  | PTPN1   | predicted |

|              |          |           |
|--------------|----------|-----------|
| CID14523449  | THRB     | predicted |
| CID138753594 | PRKCA    | predicted |
| CID610933    | ESR1     | predicted |
| CID70859637  | BLM      | predicted |
| CID3004155   | ALDH1A1  | predicted |
| CID53463561  | CYP2C19  | predicted |
| CID13914606  | ALOX5    | predicted |
| CID76551288  | POLB     | predicted |
| CID5281152   | MAPK1    | predicted |
| CID24814     | GSTA1    | predicted |
| CID100058    | CA9      | predicted |
| CID5316844   | CA9      | predicted |
| CID10970376  | CYP1B1   | predicted |
| CID9884033   | ALOX15   | predicted |
| CID10741     | TP53     | predicted |
| CID10715291  | CYP19A1  | predicted |
| CID44195972  | KDM4E    | predicted |
| CID6122937   | POLB     | predicted |
| CID138714873 | KDM4E    | predicted |
| CID4490286   | CYP19A1  | predicted |
| CID387101196 | MAOA     | predicted |
| CID45783213  | CYP19A1  | predicted |
| CID45783214  | TP53     | predicted |
| CID1201518   | KMT2A    | predicted |
| CID12445022  | ABCG2    | predicted |
| CID8417      | CA13     | predicted |
| CID5280460   | XDH      | predicted |
| CID5316647   | NPSR1    | predicted |
| CID5281792   | ALDH1A1  | predicted |
| CID196216    | NPC1     | predicted |
| CID519954    | SHBG     | predicted |
| CID5322049   | RAB9A    | predicted |
| CID5322048   | HSD17B10 | predicted |
| CID22559443  | ALOX15   | predicted |
| CID5281663   | NOX4     | predicted |
| CID296191    | NPSR1    | predicted |
| CID68252     | TP53     | predicted |
| CID5372954   | ABCG2    | predicted |
| CID1549106   | CA5A     | predicted |
| CID145627453 | MAPK1    | predicted |
| CID7424      | KMT2A    | predicted |
| CID1309      | HTR1A    | predicted |
| CID5321869   | CYP2C19  | predicted |
| CID5321200   | MAOB     | predicted |
| CID4483044   | HSP90AA1 | predicted |
| CID49824629  | ABCG2    | predicted |
| CID5321859   | KMT2A    | predicted |
| CID3415719   | MAOA     | predicted |
| CID5320471   | ADORA3   | predicted |
| CID5321865   | CYP2C19  | predicted |
| CID71307292  | ALDH1A1  | predicted |
| CID21155632  | ACHE     | predicted |
| CID547509    | TRPV1    | predicted |
| CID5322076   | CYP2C19  | predicted |
| CID124211    | HPGD     | predicted |
| CID14135334  | APEX1    | predicted |
| CID5321205   | CYP2C19  | predicted |
| CID4961358   | PTPN1    | predicted |

|             |          |           |
|-------------|----------|-----------|
| CID20763017 | ACHE     | predicted |
| CID296119   | ALDH1A1  | predicted |
| CID445858   | TSHR     | predicted |
| CID22376357 | HSP90AA1 | predicted |
| CID119034   | NPSR1    | predicted |
| CID6552009  | KMT2A    | predicted |
| CID5284500  | THRB     | predicted |
| CID12309393 | ACHE     | predicted |
| CID101761   | MAPK1    | predicted |
| CID6973640  | KMT2A    | predicted |
| CID6321405  | KMT2A    | predicted |
| CID1567554  | CA2      | predicted |
| CID4220788  | MAPK1    | predicted |
| CID20163303 | HSD11B1  | predicted |
| CID455809   | HTT      | predicted |
| CID3082025  | ALOX15   | predicted |
| CID6365403  | HBB      | predicted |
| CID73648    | LMNA     | predicted |
| CID8205     | KMT2A    | predicted |
| CID5320193  | PTPN1    | predicted |
| CID338      | MAPT     | predicted |
| CID11095    | RAB9A    | predicted |
| CID5320384  | ABCG2    | predicted |
| CID22311    | CNR1     | predicted |
| CID26049    | ALDH1A1  | predicted |
| CID5282745  | TDP1     | predicted |
| CID6438157  | FABP3    | predicted |
| CID274352   | NPC1     | predicted |
| CID5316834  | TSHR     | predicted |
| CID5320475  | APEX1    | predicted |
| CID5316833  | HPGD     | predicted |
| CID124869   | RAB9A    | predicted |
| CID9816931  | TSHR     | predicted |
| CID49773122 | KMT2A    | predicted |
| CID402      | HBB      | predicted |
| CID111446   | TDP1     | predicted |
| CID15265    | CCR5     | predicted |
| CID5351506  | PTPN1    | predicted |
| CID5245     | MAPK1    | predicted |
| CID767      | ABCG2    | predicted |
| CID370      | L3MBTL1  | predicted |
| CID19009    | RAB9A    | predicted |
| CID2353     | ALOX15   | predicted |
| CID1115     | BACE1    | predicted |
| CID4068592  | NFKB1    | predicted |
| CID14896    | TDP1     | predicted |
| CID6654     | BCHE     | predicted |
| CID638011   | CYP19A1  | predicted |
| CID521380   | CNR1     | predicted |
| CID608886   | MAPK1    | predicted |
| CID520159   | TRPV1    | predicted |
| CID10997578 | PTGS1    | predicted |
| CID225      | NPSR1    | predicted |
| CID223578   | NPSR1    | predicted |
| CID10168    | ALOX12   | predicted |
| CID5281607  | CA5A     | predicted |
| CID11186895 | DRD1     | Known     |
| CID2537     | MAPT     | Known     |

|             |         |       |
|-------------|---------|-------|
| CID6054     | TAAR1   | Known |
| CID5280450  | PPARA   | Known |
| CID5280450  | FABP3   | Known |
| CID5280450  | FFAR1   | Known |
| CID5280450  | FFAR4   | Known |
| CID5280450  | PPARD   | Known |
| CID5280450  | PPARG   | Known |
| CID5280450  | FABP4   | Known |
| CID5280450  | ALOX15  | Known |
| CID5280450  | HPGD    | Known |
| CID5280450  | LMNA    | Known |
| CID445638   | PPARA   | Known |
| CID445638   | PPARG   | Known |
| CID445638   | PPARD   | Known |
| CID6989     | TRPA1   | Known |
| CID6989     | LMNA    | Known |
| CID445070   | MAOB    | Known |
| CID379      | TSHR    | Known |
| CID379      | LMNA    | Known |
| CID5280666  | CYP1A2  | Known |
| CID5280666  | CYP1A1  | Known |
| CID5280666  | CYP1B1  | Known |
| CID5280666  | GSTP1   | Known |
| CID5280666  | ABCC1   | Known |
| CID445639   | FABP1   | Known |
| CID445639   | PPARA   | Known |
| CID445639   | PPARD   | Known |
| CID445639   | FABP5   | Known |
| CID445639   | FABP4   | Known |
| CID445639   | PPARG   | Known |
| CID445639   | FAAH    | Known |
| CID445639   | TERT    | Known |
| CID637511   | TRPA1   | Known |
| CID637511   | ALDH1A1 | Known |
| CID637511   | LMNA    | Known |
| CID23443619 | ALDH1A1 | Known |
| CID23443619 | BLM     | Known |
| CID5246487  | GLA     | Known |
| CID5246487  | NOS2    | Known |
| CID5246487  | TSHR    | Known |
| CID5246487  | NFKB1   | Known |
| CID5246487  | CYP2C19 | Known |
| CID5280961  | AR      | Known |
| CID5280961  | ESR2    | Known |
| CID5280961  | ESR1    | Known |
| CID5280961  | ESRRG   | Known |
| CID5280961  | NR3C1   | Known |
| CID5280961  | TBXAS1  | Known |
| CID5280961  | ABCG2   | Known |
| CID5280961  | TP53    | Known |
| CID5280961  | ESRRB   | Known |
| CID5280961  | CYP3A4  | Known |
| CID5280961  | AOX1    | Known |
| CID5280961  | ESRRA   | Known |
| CID5280961  | TSHR    | Known |
| CID5280961  | HSD17B1 | Known |
| CID5280961  | MGAM    | Known |
| CID5280961  | RAB9A   | Known |

|            |          |       |
|------------|----------|-------|
| CID5280961 | NPC1     | Known |
| CID5280961 | CYP2C19  | Known |
| CID5280961 | CYP2C9   | Known |
| CID5280961 | SLCO1B3  | Known |
| CID5280961 | SLCO1B1  | Known |
| CID5280961 | MAPT     | Known |
| CID5280961 | ABL1     | Known |
| CID5280961 | MAPK1    | Known |
| CID5280961 | EGFR     | Known |
| CID5280961 | HIF1A    | Known |
| CID5280961 | TDP1     | Known |
| CID5280961 | THPO     | Known |
| CID5280961 | BLM      | Known |
| CID5281767 | BRCA1    | Known |
| CID5281767 | ALDH1A1  | Known |
| CID5281767 | TSHR     | Known |
| CID5281767 | HTT      | Known |
| CID5281767 | HSD17B10 | Known |
| CID5281767 | TDP1     | Known |
| CID5281767 | KMT2A    | Known |
| CID5281767 | NPSR1    | Known |
| CID5281767 | LMNA     | Known |
| CID5281767 | MAPT     | Known |
| CID5281767 | HIF1A    | Known |
| CID68073   | CYP3A4   | Known |
| CID969516  | BRCA1    | Known |
| CID969516  | ALDH1A1  | Known |
| CID969516  | TSHR     | Known |
| CID969516  | HTT      | Known |
| CID969516  | HSD17B10 | Known |
| CID969516  | TDP1     | Known |
| CID969516  | KMT2A    | Known |
| CID969516  | NPSR1    | Known |
| CID969516  | LMNA     | Known |
| CID969516  | MAPT     | Known |
| CID969516  | HIF1A    | Known |
| CID6115    | TSHR     | Known |
| CID5281614 | MAPK10   | Known |
| CID5281614 | XDH      | Known |
| CID5281614 | MAPK14   | Known |
| CID5281614 | CDK5     | Known |
| CID5281614 | PIM1     | Known |
| CID5281614 | CDK6     | Known |
| CID5281614 | ALOX15   | Known |
| CID5281614 | HPGD     | Known |
| CID5281614 | CREBBP   | Known |
| CID5281614 | MAPT     | Known |
| CID5281614 | CDK2     | Known |
| CID5281614 | ALOX12   | Known |
| CID5281614 | TP53     | Known |
| CID5281614 | MAPK1    | Known |
| CID5281614 | ACHE     | Known |
| CID5281614 | HSD17B10 | Known |
| CID5281614 | RECQL    | Known |
| CID5281614 | APEX1    | Known |
| CID5281614 | KMT2A    | Known |
| CID440735  | CYP1B1   | Known |
| CID261859  | CYP3A4   | Known |

|            |          |       |
|------------|----------|-------|
| CID219592  | CES2     | Known |
| CID5280460 | GLA      | Known |
| CID5280460 | CASP7    | Known |
| CID5280460 | CA9      | Known |
| CID5280460 | CA12     | Known |
| CID5280460 | CASP1    | Known |
| CID5280460 | CA7      | Known |
| CID5280460 | HPGD     | Known |
| CID5280460 | ALDH1A1  | Known |
| CID5280460 | HSD17B10 | Known |
| CID5280460 | GAA      | Known |
| CID5280460 | KDM4E    | Known |
| CID5280460 | KMT2A    | Known |
| CID5281663 | MAOA     | Known |
| CID7424    | CA9      | Known |
| CID7424    | CA12     | Known |
| CID7424    | CA1      | Known |
| CID7424    | CA7      | Known |
| CID7424    | CA2      | Known |
| CID7424    | CA14     | Known |
| CID445858  | CA1      | Known |
| CID445858  | CA12     | Known |
| CID445858  | CA9      | Known |
| CID445858  | CA7      | Known |
| CID445858  | CA2      | Known |
| CID445858  | CA14     | Known |
| CID445858  | CA6      | Known |
| CID445858  | CA5A     | Known |
| CID5284500 | MAPT     | Known |
| CID338     | CA1      | Known |
| CID338     | CA2      | Known |
| CID338     | CA12     | Known |
| CID11095   | CYP1B1   | Known |
| CID5245    | FDPS     | Known |
| CID370     | CA12     | Known |
| CID370     | CA1      | Known |
| CID370     | CA2      | Known |
| CID370     | CA9      | Known |
| CID370     | CA7      | Known |
| CID370     | CA14     | Known |
| CID370     | CA6      | Known |
| CID370     | CA4      | Known |
| CID370     | CA5A     | Known |
| CID370     | CA5B     | Known |
| CID370     | CA3      | Known |
| CID370     | HPGD     | Known |
| CID370     | HSD17B10 | Known |
| CID370     | ALDH1A1  | Known |
| CID370     | TDP1     | Known |
| CID370     | TP53     | Known |
| CID370     | SERPINE1 | Known |
| CID370     | MAPT     | Known |
| CID370     | KDM4E    | Known |
| CID370     | LMNA     | Known |
| CID19009   | ACHE     | Known |
| CID19009   | LMNA     | Known |
| CID19009   | CYP3A4   | Known |
| CID2353    | SENP8    | Known |



|             |          |           |
|-------------|----------|-----------|
| CID2353     | ACHE     | Known     |
| CID2353     | CYP2D6   | Known     |
| CID2353     | HIF1A    | Known     |
| CID2353     | SMN1     | Known     |
| CID4068592  | BLM      | Known     |
| CID10168    | HSP90AA1 | Known     |
| CID10168    | HSP90AB1 | Known     |
| CID10168    | TDP1     | Known     |
| CID10168    | RECQL    | Known     |
| CID10168    | MAPT     | Known     |
| CID10168    | SMN1     | Known     |
| CID10168    | CYP3A4   | Known     |
| CID5281607  | CYP1A2   | Known     |
| CID5281607  | CYP1A1   | Known     |
| CID5281607  | CYP1B1   | Known     |
| CID5281607  | AR       | Known     |
| CID5281607  | NR3C1    | Known     |
| CID5281607  | CA12     | Known     |
| CID5281607  | CA9      | Known     |
| CID5281607  | CA1      | Known     |
| CID5281607  | ABCG2    | Known     |
| CID5281607  | CA2      | Known     |
| CID5281607  | ABCB1    | Known     |
| CID5281607  | CBR1     | Known     |
| CID5281607  | CYP3A4   | Known     |
| CID5281607  | CDK6     | Known     |
| CID5281607  | XDH      | Known     |
| CID5281607  | CDK5     | Known     |
| CID5281607  | CYP2C19  | Known     |
| CID5281607  | CYP19A1  | Known     |
| CID5281607  | CYP2C9   | Known     |
| CID5281607  | HPGD     | Known     |
| CID5281607  | ALDH1A1  | Known     |
| CID5281607  | MAPT     | Known     |
| CID5281607  | HSD17B10 | Known     |
| CID5281607  | HIF1A    | Known     |
| CID5281607  | AKR1B1   | Known     |
| CID5281607  | SMN1     | Known     |
| CID18502770 | TSHR     | predicted |
| CID18502770 | PTPN1    | predicted |
| CID18502770 | LMNA     | predicted |
| CID18502770 | CYP3A4   | predicted |
| CID18502770 | MAPT     | predicted |
| CID18502770 | ACHE     | predicted |
| CID18502770 | GPBAR1   | predicted |
| CID18502770 | ALDH1A1  | predicted |
| CID18502770 | SMN1     | predicted |
| CID18502770 | RAB9A    | predicted |
| CID18502770 | CYP19A1  | predicted |
| CID18502770 | HSD11B1  | predicted |
| CID18502770 | KMT2A    | predicted |
| CID18502770 | SHBG     | predicted |
| CID18502770 | TDP1     | predicted |
| CID18502770 | BCHE     | predicted |
| CID18502770 | TP53     | predicted |
| CID18502770 | NPC1     | predicted |
| CID18502770 | SLCO1B3  | predicted |
| CID18502770 | ALOX5    | predicted |

|           |         |           |
|-----------|---------|-----------|
| CID441676 | PTPN1   | predicted |
| CID441676 | GPBAR1  | predicted |
| CID441676 | LMNA    | predicted |
| CID441676 | MAPT    | predicted |
| CID441676 | CYP3A4  | predicted |
| CID441676 | TSHR    | predicted |
| CID441676 | TNF     | predicted |
| CID441676 | HSD11B1 | predicted |
| CID441676 | CYP19A1 | predicted |
| CID441676 | SHBG    | predicted |
| CID441676 | SMN1    | predicted |
| CID441676 | RAB9A   | predicted |
| CID441676 | ALDH1A1 | predicted |
| CID441676 | ALOX5   | predicted |
| CID441676 | KMT2A   | predicted |
| CID441676 | NPC1    | predicted |
| CID441676 | AKR1B10 | predicted |
| CID441676 | ACHE    | predicted |
| CID441676 | BCHE    | predicted |
| CID441676 | MAPK1   | predicted |
