# Supplementary material for: [Retracted] In Silico Identification and Mechanism Exploration of Active Ingredients against Stroke from An‐Gong‐Niu‐Huang‐Wan (AGNHW) Formula
Source: Hindawi journal article supplement (doi:10.1155/2022/5218993), 2022-01-01
Supplement: f4 [file 5218993.f4.pdf]

KEGG\_A\_class

Metabolism  
Human Diseases  
Human Diseases  
Organismal Systems  
Human Diseases  
Human Diseases  
Human Diseases  
Organismal Systems  
Organismal Systems  
Metabolism  
Human Diseases  
Organismal Systems  
Environmental Information Processing  
Environmental Information Processing  
Metabolism  
Metabolism  
Environmental Information Processing  
Organismal Systems  
Environmental Information Processing  
Human Diseases  
Human Diseases  
Human Diseases  
Metabolism  
Metabolism  
Metabolism  
Human Diseases  
Human Diseases  
Organismal Systems  
Organismal Systems  
Human Diseases  
Organismal Systems  
Human Diseases  
Human Diseases  
Human Diseases  
Organismal Systems  
Organismal Systems  
Environmental Information Processing  
Environmental Information Processing  
Human Diseases  
Organismal Systems  
Human Diseases  
Environmental Information Processing  
Metabolism  
Environmental Information Processing  
Cellular Processes  
Organismal Systems  
Human Diseases  
Human Diseases  
Human Diseases  
Metabolism  
Human Diseases  
Human Diseases  
Organismal Systems  
Environmental Information Processing  
Human Diseases  
Human Diseases  
Metabolism

KEGG\_B\_class

Lipid metabolism  
Cardiovascular diseases  
Cancers  
Nervous system  
Cancers  
Cancers  
Cancers  
Immune system  
Endocrine system  
Lipid metabolism  
Endocrine and metabolic diseases  
Endocrine system  
Signal transduction  
Signal transduction  
Amino acid metabolism  
Amino acid metabolism  
Signal transduction  
Immune system  
Signal transduction  
Cancers  
Drug resistance  
Infectious diseases  
Global and overview maps  
Metabolism of cofactors and vitamins  
Xenobiotics biodegradation and met  
Cardiovascular diseases  
Cancers  
Endocrine system  
Endocrine system  
Infectious diseases  
Endocrine system  
Immune diseases  
Neurodegenerative diseases  
Cancers  
Endocrine system  
Endocrine system  
Signal transduction  
Signal transduction  
Cancers  
Endocrine system  
Infectious diseases  
Signaling molecules and interaction  
Lipid metabolism  
Signal transduction  
Cellular community - eukaryotes  
Digestive system  
Infectious diseases  
Infectious diseases  
Infectious diseases  
Xenobiotics biodegradation and met  
Infectious diseases  
Infectious diseases  
Immune system  
Signal transduction  
Cardiovascular diseases  
Cancers  
Amino acid metabolism

|                                      |                                           |
|--------------------------------------|-------------------------------------------|
| Human Diseases                       | Infectious diseases                       |
| Human Diseases                       | Infectious diseases                       |
| Human Diseases                       | Cancers                                   |
| Organismal Systems                   | Excretory system                          |
| Human Diseases                       | Endocrine and metabolic diseases          |
| Cellular Processes                   | Cell motility                             |
| Environmental Information Processing | Signal transduction                       |
| Human Diseases                       | Infectious diseases                       |
| Human Diseases                       | Cancers                                   |
| Metabolism                           | Lipid metabolism                          |
| Human Diseases                       | Cancers                                   |
| Cellular Processes                   | Cell growth and death                     |
| Cellular Processes                   | Transport and catabolism                  |
| Organismal Systems                   | Endocrine system                          |
| Organismal Systems                   | Endocrine system                          |
| Human Diseases                       | Cardiovascular diseases                   |
| Human Diseases                       | Cancers                                   |
| Human Diseases                       | Infectious diseases                       |
| Human Diseases                       | Cancers                                   |
| Human Diseases                       | Infectious diseases                       |
| Human Diseases                       | Cancers                                   |
| Organismal Systems                   | Immune system                             |
| Metabolism                           | Glycan biosynthesis and metabolism        |
| Human Diseases                       | Drug resistance                           |
| Metabolism                           | Xenobiotics biodegradation and metabolism |
| Organismal Systems                   | Immune system                             |
| Organismal Systems                   | Endocrine system                          |
| Human Diseases                       | Infectious diseases                       |
| Organismal Systems                   | Development                               |
| Cellular Processes                   | Transport and catabolism                  |
| Metabolism                           | Metabolism of terpenoids and polyketides  |
| Environmental Information Processing | Signaling molecules and interaction       |
| Cellular Processes                   | Transport and catabolism                  |
| Organismal Systems                   | Digestive system                          |
| Metabolism                           | Amino acid metabolism                     |
| Organismal Systems                   | Aging                                     |
| Environmental Information Processing | Signal transduction                       |
| Organismal Systems                   | Endocrine system                          |
| Environmental Information Processing | Signal transduction                       |
| Organismal Systems                   | Immune system                             |
| Organismal Systems                   | Immune system                             |
| Organismal Systems                   | Endocrine system                          |
| Metabolism                           | Carbohydrate metabolism                   |
| Metabolism                           | Carbohydrate metabolism                   |
| Metabolism                           | Metabolism of other amino acids           |
| Organismal Systems                   | Immune system                             |
| Genetic Information Processing       | Replication and repair                    |
| Organismal Systems                   | Circulatory system                        |
| Environmental Information Processing | Signal transduction                       |
| Metabolism                           | Carbohydrate metabolism                   |
| Environmental Information Processing | Signal transduction                       |
| Human Diseases                       | Drug resistance                           |
| Cellular Processes                   | Cell growth and death                     |
| Metabolism                           | Carbohydrate metabolism                   |
| Human Diseases                       | Immune diseases                           |
| Metabolism                           | Lipid metabolism                          |
| Cellular Processes                   | Cell growth and death                     |
| Organismal Systems                   | Circulatory system                        |

|                                      |                                     |
|--------------------------------------|-------------------------------------|
| Human Diseases                       | Infectious diseases                 |
| Organismal Systems                   | Digestive system                    |
| Environmental Information Processing | Signal transduction                 |
| Metabolism                           | Amino acid metabolism               |
| Organismal Systems                   | Digestive system                    |
| Human Diseases                       | Endocrine and metabolic diseases    |
| Metabolism                           | Lipid metabolism                    |
| Human Diseases                       | Endocrine and metabolic diseases    |
| Human Diseases                       | Cancers                             |
| Metabolism                           | Metabolism of other amino acids     |
| Organismal Systems                   | Nervous system                      |
| Environmental Information Processing | Membrane transport                  |
| Human Diseases                       | Cancers                             |
| Metabolism                           | Amino acid metabolism               |
| Human Diseases                       | Cancers                             |
| Human Diseases                       | Neurodegenerative diseases          |
| Metabolism                           | Carbohydrate metabolism             |
| Human Diseases                       | Infectious diseases                 |
| Human Diseases                       | Cancers                             |
| Human Diseases                       | Cancers                             |
| Human Diseases                       | Drug resistance                     |
| Organismal Systems                   | Endocrine system                    |
| Human Diseases                       | Cancers                             |
| Organismal Systems                   | Digestive system                    |
| Organismal Systems                   | Immune system                       |
| Human Diseases                       | Cancers                             |
| Human Diseases                       | Neurodegenerative diseases          |
| Human Diseases                       | Cancers                             |
| Environmental Information Processing | Signal transduction                 |
| Human Diseases                       | Infectious diseases                 |
| Organismal Systems                   | Endocrine system                    |
| Environmental Information Processing | Signal transduction                 |
| Human Diseases                       | Infectious diseases                 |
| Cellular Processes                   | Cellular community - eukaryotes     |
| Organismal Systems                   | Environmental adaptation            |
| Organismal Systems                   | Sensory system                      |
| Human Diseases                       | Substance dependence                |
| Organismal Systems                   | Endocrine system                    |
| Human Diseases                       | Cancers                             |
| Human Diseases                       | Cancers                             |
| Human Diseases                       | Immune diseases                     |
| Organismal Systems                   | Immune system                       |
| Metabolism                           | Global and overview maps            |
| Organismal Systems                   | Sensory system                      |
| Human Diseases                       | Infectious diseases                 |
| Organismal Systems                   | Nervous system                      |
| Cellular Processes                   | Cell growth and death               |
| Cellular Processes                   | Transport and catabolism            |
| Cellular Processes                   | Transport and catabolism            |
| Cellular Processes                   | Cell growth and death               |
| Human Diseases                       | Immune diseases                     |
| Environmental Information Processing | Signaling molecules and interaction |
| Environmental Information Processing | Signal transduction                 |
| Human Diseases                       | Infectious diseases                 |
| Environmental Information Processing | Signal transduction                 |
| Human Diseases                       | Endocrine and metabolic diseases    |
| Organismal Systems                   | Nervous system                      |
| Human Diseases                       | Endocrine and metabolic diseases    |

Environmental Information Processing  
Cellular Processes  
Organismal Systems  
Metabolism  
Organismal Systems  
Organismal Systems  
Human Diseases  
Organismal Systems  
Cellular Processes  
Human Diseases  
Human Diseases  
Organismal Systems  
Organismal Systems

Signal transduction  
Cell growth and death  
Immune system  
Nucleotide metabolism  
Immune system  
Immune system  
Immune diseases  
Environmental adaptation  
Transport and catabolism  
Infectious diseases  
Immune diseases  
Immune system  
Immune system

| Pathway                                         | out (55) | All (8514) | Pvalue     | Qvalue   |
|-------------------------------------------------|----------|------------|------------|----------|
| Arachidonic acid metabolism                     | 9        | 70         | 4.76E-10   | 8.85E-08 |
| Fluid shear stress and atherosclerosis          | 9        | 149        | 3.87E-07   | 3.60E-05 |
| Proteoglycans in cancer                         | 10       | 210        | 7.47E-07   | 4.63E-05 |
| Serotonergic synapse                            | 8        | 125        | 1.18E-06   | 4.66E-05 |
| Pathways in cancer                              | 15       | 550        | 1.25E-06   | 4.66E-05 |
| Bladder cancer                                  | 5        | 43         | 7.46E-06   | 2.31E-04 |
| Chemical carcinogenesis                         | 6        | 90         | 2.26E-05   | 5.40E-04 |
| Platelet activation                             | 7        | 135        | 2.32E-05   | 5.40E-04 |
| Relaxin signaling pathway                       | 7        | 138        | 2.68E-05   | 5.53E-04 |
| Linoleic acid metabolism                        | 4        | 30         | 3.77E-05   | 7.01E-04 |
| AGE-RAGE signaling pathway in diabetes          | 6        | 114        | 8.58E-05   | 1.45E-03 |
| PPAR signaling pathway                          | 5        | 79         | 0.00014651 | 2.27E-03 |
| Calcium signaling pathway                       | 7        | 189        | 0.00019588 | 2.80E-03 |
| Apelin signaling pathway                        | 6        | 141        | 0.00027586 | 3.63E-03 |
| Arginine and proline metabolism                 | 4        | 51         | 0.00031097 | 3.63E-03 |
| Arginine biosynthesis                           | 3        | 21         | 0.00031246 | 3.63E-03 |
| HIF-1 signaling pathway                         | 5        | 102        | 0.00048386 | 5.29E-03 |
| IL-17 signaling pathway                         | 5        | 106        | 0.00057732 | 5.97E-03 |
| VEGF signaling pathway                          | 4        | 61         | 0.00061908 | 6.06E-03 |
| MicroRNAs in cancer                             | 6        | 168        | 0.00070292 | 6.54E-03 |
| Endocrine resistance                            | 5        | 116        | 0.00087017 | 7.36E-03 |
| Chagas disease (American trypanosomiasis)       | 5        | 116        | 0.00087017 | 7.36E-03 |
| Metabolic pathways                              | 19       | 1416       | 0.00093118 | 7.53E-03 |
| Retinol metabolism                              | 4        | 75         | 0.00134873 | 1.05E-02 |
| Drug metabolism - cytochrome P450               | 4        | 83         | 0.00196286 | 1.46E-02 |
| Hypertrophic cardiomyopathy (HCM)               | 4        | 92         | 0.00285943 | 2.05E-02 |
| Small cell lung cancer                          | 4        | 100        | 0.00386306 | 2.66E-02 |
| Ovarian Steroidogenesis                         | 3        | 51         | 0.004267   | 2.83E-02 |
| Estrogen signaling pathway                      | 5        | 171        | 0.00476682 | 3.06E-02 |
| Malaria                                         | 3        | 55         | 0.00527872 | 3.27E-02 |
| Regulation of lipolysis in adipocyte            | 3        | 56         | 0.00555225 | 3.33E-02 |
| Rheumatoid arthritis                            | 5        | 188        | 0.00708759 | 4.12E-02 |
| Amyotrophic lateral sclerosis (ALS)             | 3        | 63         | 0.0077055  | 4.34E-02 |
| Transcriptional misregulation in cancer         | 5        | 195        | 0.00824075 | 4.51E-02 |
| Renin secretion                                 | 3        | 67         | 0.00912859 | 4.63E-02 |
| Renin-angiotensin system                        | 2        | 23         | 0.00950364 | 4.63E-02 |
| TNF signaling pathway                           | 4        | 130        | 0.00970641 | 4.63E-02 |
| PI3K-Akt signaling pathway                      | 7        | 374        | 0.00982454 | 4.63E-02 |
| Central carbon metabolism in cancer             | 3        | 69         | 0.00989404 | 4.63E-02 |
| Thyroid hormone signaling pathway               | 4        | 131        | 0.00996485 | 4.63E-02 |
| Toxoplasmosis                                   | 5        | 207        | 0.01051179 | 4.77E-02 |
| Neuroactive ligand-receptor interactions        | 6        | 293        | 0.01110419 | 4.78E-02 |
| Steroid hormone biosynthesis                    | 3        | 72         | 0.0111106  | 4.78E-02 |
| Rap1 signaling pathway                          | 5        | 211        | 0.01135585 | 4.78E-02 |
| Focal adhesion                                  | 5        | 212        | 0.01157392 | 4.78E-02 |
| Bile secretion                                  | 3        | 75         | 0.01241013 | 5.02E-02 |
| Human cytomegalovirus infection                 | 6        | 307        | 0.01374834 | 5.44E-02 |
| Human papillomavirus infection                  | 7        | 416        | 0.01690157 | 6.55E-02 |
| Leishmaniasis                                   | 4        | 155        | 0.0175636  | 6.67E-02 |
| Metabolism of xenobiotics by cytochrome P450    | 3        | 87         | 0.01845395 | 6.86E-02 |
| Kaposi sarcoma-associated herpesvirus infection | 5        | 241        | 0.01920565 | 6.98E-02 |
| Hepatitis B                                     | 4        | 160        | 0.01950141 | 6.98E-02 |
| Complement and coagulation cascades             | 3        | 97         | 0.02454056 | 8.50E-02 |
| cGMP - PKG signaling pathway                    | 4        | 172        | 0.02467876 | 8.50E-02 |
| Dilated cardiomyopathy (DCM)                    | 3        | 100        | 0.02655391 | 8.98E-02 |
| Prostate cancer                                 | 3        | 101        | 0.02724424 | 9.05E-02 |
| Tryptophan metabolism                           | 2        | 42         | 0.02991616 | 9.59E-02 |

|                                        |   |     |            |          |
|----------------------------------------|---|-----|------------|----------|
| African trypanosomiasis                | 2 | 42  | 0.02991616 | 9.59E-02 |
| Amoebiasis                             | 3 | 106 | 0.03083959 | 9.69E-02 |
| Thyroid cancer                         | 2 | 43  | 0.03124756 | 9.69E-02 |
| Endocrine and other factor-regulated   | 2 | 50  | 0.04119722 | 1.26E-01 |
| Insulin resistance                     | 3 | 122 | 0.0439372  | 1.32E-01 |
| Regulation of actin cytoskeleton       | 4 | 218 | 0.05172375 | 1.53E-01 |
| Sphingolipid signaling pathway         | 3 | 132 | 0.05332639 | 1.55E-01 |
| Hepatitis C                            | 3 | 144 | 0.06576419 | 1.88E-01 |
| Acute myeloid leukemia                 | 2 | 68  | 0.07121936 | 2.01E-01 |
| Glycerolipid metabolism                | 2 | 71  | 0.07675671 | 2.10E-01 |
| Renal cell carcinoma                   | 2 | 71  | 0.07675671 | 2.10E-01 |
| p53 signaling pathway                  | 2 | 73  | 0.08052239 | 2.10E-01 |
| Mitophagy - animal                     | 2 | 73  | 0.08052239 | 2.10E-01 |
| Oxytocin signaling pathway             | 3 | 158 | 0.08180415 | 2.10E-01 |
| Prolactin signaling pathway            | 2 | 74  | 0.08242669 | 2.10E-01 |
| Arrhythmogenic right ventricular card  | 2 | 74  | 0.08242669 | 2.10E-01 |
| Gastric cancer                         | 3 | 161 | 0.08544472 | 2.10E-01 |
| Tuberculosis                           | 4 | 259 | 0.08554679 | 2.10E-01 |
| Breast cancer                          | 3 | 162 | 0.08667363 | 2.10E-01 |
| Legionellosis                          | 2 | 77  | 0.08822236 | 2.10E-01 |
| Pancreatic cancer                      | 2 | 77  | 0.08822236 | 2.10E-01 |
| Fc epsilon RI signaling pathway        | 2 | 79  | 0.09215264 | 2.16E-01 |
| Glycosphingolipid biosynthesis - glob  | 1 | 15  | 0.09271063 | 2.16E-01 |
| EGFR tyrosine kinase inhibitor resist  | 2 | 82  | 0.09814294 | 2.25E-01 |
| Drug metabolism - other enzymes        | 2 | 84  | 0.102197   | 2.32E-01 |
| Hematopoietic cell lineage             | 3 | 176 | 0.1046552  | 2.35E-01 |
| Adipocytokine signaling pathway        | 2 | 87  | 0.1083641  | 2.40E-01 |
| Pertussis                              | 2 | 92  | 0.1188575  | 2.59E-01 |
| Osteoclast differentiation             | 3 | 187 | 0.1197395  | 2.59E-01 |
| Peroxisome                             | 2 | 94  | 0.123125   | 2.63E-01 |
| Terpenoid backbone biosynthesis        | 1 | 21  | 0.1273839  | 2.69E-01 |
| ECM-receptor interaction               | 2 | 98  | 0.131771   | 2.75E-01 |
| Phagosome                              | 4 | 305 | 0.1335531  | 2.76E-01 |
| Salivary secretion                     | 2 | 100 | 0.1361463  | 2.78E-01 |
| Histidine metabolism                   | 1 | 24  | 0.1442293  | 2.92E-01 |
| Longevity regulating pathway - mamr    | 2 | 105 | 0.1472246  | 2.94E-01 |
| cAMP signaling pathway                 | 3 | 208 | 0.1505975  | 2.97E-01 |
| Aldosterone synthesis and secretion    | 2 | 107 | 0.1517081  | 2.97E-01 |
| MAPK signaling pathway                 | 4 | 332 | 0.1659875  | 3.22E-01 |
| C-type lectin receptor signaling pathv | 2 | 116 | 0.1722046  | 3.28E-01 |
| Leukocyte transendothelial migration   | 2 | 117 | 0.174511   | 3.28E-01 |
| Parathyroid hormone synthesis, secr    | 2 | 117 | 0.174511   | 3.28E-01 |
| Ascorbate and aldarate metabolism      | 1 | 30  | 0.1769679  | 3.29E-01 |
| Pentose phosphate pathway              | 1 | 31  | 0.1823035  | 3.32E-01 |
| beta-Alanine metabolism                | 1 | 31  | 0.1823035  | 3.32E-01 |
| Toll-like receptor signaling pathway   | 2 | 122 | 0.1861178  | 3.36E-01 |
| Base excision repair                   | 1 | 33  | 0.1928729  | 3.42E-01 |
| Vascular smooth muscle contraction     | 2 | 125 | 0.1931362  | 3.42E-01 |
| NF-kappa B signaling pathway           | 2 | 127 | 0.1978353  | 3.44E-01 |
| Galactose metabolism                   | 1 | 34  | 0.1981072  | 3.44E-01 |
| AMPK signaling pathway                 | 2 | 129 | 0.2025491  | 3.49E-01 |
| Antifolate resistance                  | 1 | 40  | 0.2288202  | 3.87E-01 |
| Ferroptosis                            | 1 | 40  | 0.2288202  | 3.87E-01 |
| Pyruvate metabolism                    | 1 | 42  | 0.2387989  | 4.00E-01 |
| Inflammatory bowel disease (IBD)       | 2 | 145 | 0.2406597  | 4.00E-01 |
| Fatty acid degradation                 | 1 | 44  | 0.2486508  | 4.09E-01 |
| Apoptosis                              | 2 | 153 | 0.2598775  | 4.24E-01 |
| Adrenergic signaling in cardiomyocyt   | 2 | 154 | 0.262283   | 4.24E-01 |

|                                            |   |     |           |          |
|--------------------------------------------|---|-----|-----------|----------|
| Measles                                    | 2 | 155 | 0.2646888 | 4.24E-01 |
| Fat digestion and absorption               | 1 | 49  | 0.2727361 | 4.32E-01 |
| Wnt signaling pathway                      | 2 | 159 | 0.274314  | 4.32E-01 |
| Valine, leucine and isoleucine degrac      | 1 | 50  | 0.2774613 | 4.34E-01 |
| Mineral absorption                         | 1 | 55  | 0.3006393 | 4.66E-01 |
| Type II diabetes mellitus                  | 1 | 56  | 0.3051865 | 4.69E-01 |
| Sphingolipid metabolism                    | 1 | 57  | 0.3097047 | 4.72E-01 |
| Non-alcoholic fatty liver disease (NAF     | 2 | 178 | 0.3199046 | 4.76E-01 |
| Hepatocellular carcinoma                   | 2 | 178 | 0.3199046 | 4.76E-01 |
| Glutathione metabolism                     | 1 | 60  | 0.3230869 | 4.76E-01 |
| Long-term depression                       | 1 | 60  | 0.3230869 | 4.76E-01 |
| ABC transporters                           | 1 | 61  | 0.3274907 | 4.76E-01 |
| Endometrial cancer                         | 1 | 61  | 0.3274907 | 4.76E-01 |
| Lysine degradation                         | 1 | 65  | 0.3448266 | 4.93E-01 |
| Basal cell carcinoma                       | 1 | 65  | 0.3448266 | 4.93E-01 |
| Alzheimer disease                          | 2 | 199 | 0.3695408 | 5.25E-01 |
| Glycolysis / Gluconeogenesis               | 1 | 72  | 0.3741147 | 5.26E-01 |
| Herpes simplex infection                   | 3 | 341 | 0.3792807 | 5.26E-01 |
| Non-small cell lung cancer                 | 1 | 74  | 0.3822439 | 5.26E-01 |
| Glioma                                     | 1 | 75  | 0.3862696 | 5.26E-01 |
| Platinum drug resistance                   | 1 | 76  | 0.3902695 | 5.26E-01 |
| Cortisol synthesis and secretion           | 1 | 76  | 0.3902695 | 5.26E-01 |
| Melanoma                                   | 1 | 76  | 0.3902695 | 5.26E-01 |
| Gastric acid secretion                     | 1 | 77  | 0.3942438 | 5.28E-01 |
| RIG-I-like receptor signaling pathway      | 1 | 79  | 0.4021162 | 5.30E-01 |
| Chronic myeloid leukemia                   | 1 | 79  | 0.4021162 | 5.30E-01 |
| Huntington disease                         | 2 | 217 | 0.4110038 | 5.38E-01 |
| Colorectal cancer                          | 1 | 88  | 0.436317  | 5.68E-01 |
| TGF-beta signaling pathway                 | 1 | 92  | 0.4508936 | 5.82E-01 |
| HTLV-I infection                           | 3 | 386 | 0.4578439 | 5.87E-01 |
| GnRH signaling pathway                     | 1 | 96  | 0.4651    | 5.89E-01 |
| Ras signaling pathway                      | 2 | 243 | 0.4685238 | 5.89E-01 |
| Salmonella infection                       | 1 | 97  | 0.4685949 | 5.89E-01 |
| Gap junction                               | 1 | 98  | 0.4720673 | 5.89E-01 |
| Circadian entrainment                      | 1 | 99  | 0.4755174 | 5.90E-01 |
| Inflammatory mediator regulation of $\tau$ | 1 | 101 | 0.4823514 | 5.90E-01 |
| Morphine addiction                         | 1 | 101 | 0.4823514 | 5.90E-01 |
| Glucagon signaling pathway                 | 1 | 107 | 0.502333  | 6.11E-01 |
| Viral carcinogenesis                       | 2 | 262 | 0.5084754 | 6.11E-01 |
| Choline metabolism in cancer               | 1 | 109 | 0.5088237 | 6.11E-01 |
| Asthma                                     | 1 | 110 | 0.5120379 | 6.11E-01 |
| T cell receptor signaling pathway          | 1 | 114 | 0.5246891 | 6.22E-01 |
| Carbon metabolism                          | 1 | 117 | 0.5339657 | 6.25E-01 |
| Taste transduction                         | 1 | 117 | 0.5339657 | 6.25E-01 |
| Influenza A                                | 2 | 277 | 0.5386538 | 6.26E-01 |
| Neurotrophin signaling pathway             | 1 | 124 | 0.5549253 | 6.41E-01 |
| Cell cycle                                 | 1 | 129 | 0.5693269 | 6.54E-01 |
| Autophagy - animal                         | 1 | 133 | 0.5805179 | 6.62E-01 |
| Lysosome                                   | 1 | 139 | 0.5967711 | 6.77E-01 |
| Cellular senescence                        | 2 | 328 | 0.6317131 | 7.06E-01 |
| Allograft rejection                        | 1 | 154 | 0.6347474 | 7.06E-01 |
| Cytokine-cytokine receptor interactio      | 2 | 330 | 0.6350565 | 7.06E-01 |
| Phospholipase D signaling pathway          | 1 | 157 | 0.6419099 | 7.06E-01 |
| Staphylococcus aureus infection            | 1 | 157 | 0.6419099 | 7.06E-01 |
| Hippo signaling pathway                    | 1 | 159 | 0.646608  | 7.07E-01 |
| Type I diabetes mellitus                   | 1 | 166 | 0.6625799 | 7.19E-01 |
| Retrograde endocannabinoid signalir        | 1 | 168 | 0.6670117 | 7.19E-01 |
| Cushing syndrome                           | 1 | 169 | 0.6692061 | 7.19E-01 |

|                                          |   |     |           |          |
|------------------------------------------|---|-----|-----------|----------|
| mTOR signaling pathway                   | 1 | 172 | 0.6757044 | 7.22E-01 |
| Necroptosis                              | 1 | 176 | 0.6841742 | 7.27E-01 |
| Th17 cell differentiation                | 1 | 186 | 0.70441   | 7.44E-01 |
| Purine metabolism                        | 1 | 189 | 0.7102285 | 7.46E-01 |
| NOD-like receptor signaling pathway      | 1 | 193 | 0.7178119 | 7.50E-01 |
| Chemokine signaling pathway              | 1 | 207 | 0.7428507 | 7.72E-01 |
| Systemic lupus erythematosus             | 1 | 226 | 0.7733735 | 7.99E-01 |
| Thermogenesis                            | 1 | 251 | 0.8081707 | 8.30E-01 |
| Endocytosis                              | 1 | 305 | 0.866406  | 8.84E-01 |
| Epstein-Barr virus infection             | 1 | 309 | 0.8699512 | 8.84E-01 |
| Graft-versus-host disease                | 1 | 314 | 0.8742529 | 8.84E-01 |
| Natural killer cell mediated cytotoxicit | 1 | 523 | 0.9697495 | 9.72E-01 |
| Antigen processing and presentation      | 1 | 536 | 0.9723491 | 9.72E-01 |



| Pathway ID | Genes                          | K_IDs                              |
|------------|--------------------------------|------------------------------------|
| ko00590    | ENSG00000059377;ENSG000000073  | K01832+K11987+K00509+K01254+K01254 |
| ko05418    | ENSG00000005961;ENSG000000087  | K06476+K01398+K01403+K05448+K05448 |
| ko05205    | ENSG000000087245;ENSG000000091 | K01398+K08550+K08268+K01403+K01403 |
| ko04726    | ENSG000000073756;ENSG000000091 | K11987+K00509+K04157+K05037+K05037 |
| ko05200    | ENSG00000005961;ENSG000000073  | K06476+K13241+K11987+K01398+K01398 |
| ko05219    | ENSG000000087245;ENSG000001000 | K01398+K01403+K05448+K04451+K04451 |
| ko05204    | ENSG000000073756;ENSG000001381 | K11987+K17719+K17718+K07408+K07408 |
| ko04611    | ENSG00000005961;ENSG000000059  | K06476+K01832+K00907+K00509+K00509 |
| ko04926    | ENSG00000007171;ENSG000000087  | K13241+K01398+K13240+K01403+K01403 |
| ko00591    | ENSG00000138109;ENSG000001381  | K17719+K17718+K17689+K17721K17721  |
| ko04933    | ENSG000000087245;ENSG000001000 | K01398+K03982+K05448+K04166+K04166 |
| ko03320    | ENSG00000112033;ENSG000001381  | K04504+K08530+K08751+K07294+K07294 |
| ko04020    | ENSG00000007171;ENSG000000065  | K13241+K00907+K13240+K04157+K04157 |
| ko04371    | ENSG00000007171;ENSG000000065  | K13241+K00907+K13240+K03982+K03982 |
| ko00330    | ENSG00000007171;ENSG000000089  | K13241+K13240+K00128+K13242K13242  |
| ko00220    | ENSG00000007171;ENSG000000089  | K13241+K13240+K13242K13242         |
| ko04066    | ENSG00000007171;ENSG000001000  | K13241+K08268+K03982+K05448+K05448 |
| ko04657    | ENSG000000073756;ENSG000001000 | K11987+K01403+K01394+K01388+K01388 |
| ko04370    | ENSG000000073756;ENSG000001120 | K11987+K05448+K05098+K13242K13242  |
| ko05206    | ENSG000000073756;ENSG000000089 | K11987+K05658+K01403+K05448+K05448 |
| ko01522    | ENSG000000087245;ENSG000000091 | K01398+K08550+K01403+K08551+K08551 |
| ko05142    | ENSG00000007171;ENSG000001000  | K13241+K03982+K10159+K01283+K01283 |
| ko01100    | ENSG00000007171;ENSG000000059  | K13241+K01832+K11987+K13240+K13240 |
| ko00830    | ENSG00000138109;ENSG000001381  | K17719+K17718+K07408+K17689K17689  |
| ko00982    | ENSG00000138109;ENSG000001381  | K17719+K17718+K17689+K17721K17721  |
| ko05410    | ENSG00000005961;ENSG000001593  | K06476+K01283+K03156+K06493K06493  |
| ko05222    | ENSG00000005961;ENSG000000073  | K06476+K13241+K11987+K04451K04451  |
| ko04913    | ENSG000000073756;ENSG000001400 | K11987+K07408+K00461K00461         |
| ko04915    | ENSG000000087245;ENSG000000091 | K01398+K08550+K01403+K08551+K08551 |
| ko05144    | ENSG00000137462;ENSG000002200  | K10159+K03156+K13823K13823         |
| ko04923    | ENSG000000073756;ENSG000000091 | K11987+K00509+K04142K04142         |
| ko05323    | ENSG00000112715;ENSG000001381  | K05448+K10159+K01394+K01388+K01388 |
| ko05014    | ENSG000000089250;ENSG000001410 | K13240+K04451+K03156K03156         |
| ko05202    | ENSG00000005381;ENSG000001000  | K10789+K01403+K08530+K04451+K04451 |
| ko04924    | ENSG00000144891;ENSG000001593  | K04166+K01283+K04142K04142         |
| ko04614    | ENSG00000144891;ENSG000001593  | K04166+K01283K01283                |
| ko04668    | ENSG000000073756;ENSG000001000 | K11987+K01403+K01394+K03156K03156  |
| ko04151    | ENSG00000005961;ENSG000001120  | K06476+K05448+K05098+K10159+K10159 |
| ko05230    | ENSG00000100644;ENSG000001410  | K08268+K04451+K00036K00036         |
| ko04919    | ENSG000000091831;ENSG000001000 | K08550+K08268+K04451+K06493K06493  |
| ko05145    | ENSG00000007171;ENSG000001381  | K13241+K10159+K04180+K03156+K03156 |
| ko04080    | ENSG00000102468;ENSG000001200  | K04157+K01315+K04166+K04142+K04142 |
| ko00140    | ENSG00000140465;ENSG000001600  | K07408+K17689+K07433K07433         |
| ko04015    | ENSG00000005961;ENSG000001120  | K06476+K05448+K05098+K04270+K04270 |
| ko04510    | ENSG00000005961;ENSG000000065  | K06476+K00907+K05448+K05098+K05098 |
| ko04976    | ENSG000000085563;ENSG000001120 | K05658+K00021+K17689K17689         |
| ko05163    | ENSG000000073756;ENSG000001120 | K11987+K05448+K04451+K04180+K04180 |
| ko05165    | ENSG00000005961;ENSG000000073  | K06476+K11987+K05448+K04451+K04451 |
| ko05140    | ENSG00000007171;ENSG000000073  | K13241+K11987+K10159+K03156K03156  |
| ko00980    | ENSG00000138109;ENSG000001400  | K17719+K07408+K17689K17689         |
| ko05167    | ENSG000000073756;ENSG000001000 | K11987+K08268+K05448+K04451+K04451 |
| ko05161    | ENSG00000100985;ENSG000001381  | K01403+K10159+K04451+K03156K03156  |
| ko04610    | ENSG00000106366;ENSG000001200  | K03982+K01315+K01313K01313         |
| ko04022    | ENSG00000065534;ENSG000001410  | K00907+K04166+K13242+K04142K04142  |
| ko05414    | ENSG00000005961;ENSG000002200  | K06476+K03156+K06493K06493         |
| ko05215    | ENSG00000100985;ENSG000001410  | K01403+K04451+K01394K01394         |
| ko00380    | ENSG00000111275;ENSG000001400  | K00128+K07408K07408                |

ko05143 ENSG00000223952;ENSG00000242K03156+K13823  
ko05146 ENSG00000007171;ENSG00000137K13241+K10159+K03156  
ko05216 ENSG00000132170;ENSG00000141K08530+K04451  
ko04961 ENSG00000091831;ENSG00000111K08550+K08539  
ko04931 ENSG00000164867;ENSG00000186K13242+K07294+K03156  
ko04810 ENSG00000005961;ENSG00000065K06476+K00907+K01313+K06493  
ko04071 ENSG00000141510;ENSG00000162K04451+K13242+K03156  
ko05160 ENSG00000141510;ENSG00000186K04451+K07294+K03156  
ko05221 ENSG00000005381;ENSG00000112K10789+K04504  
ko00561 ENSG00000102393;ENSG00000111K01189+K00128  
ko05211 ENSG00000100644;ENSG00000112K08268+K05448  
ko04115 ENSG00000106366;ENSG00000141K03982+K04451  
ko04137 ENSG00000100644;ENSG00000141K08268+K04451  
ko04921 ENSG00000065534;ENSG00000073K00907+K11987+K13242  
ko04917 ENSG00000091831;ENSG00000140K08550+K08551  
ko05412 ENSG00000005961;ENSG00000259K06476+K06493  
ko05226 ENSG00000085563;ENSG00000141K05658+K04451+K11126  
ko05152 ENSG00000007171;ENSG00000111K13241+K08539+K10159+K03156  
ko05224 ENSG00000091831;ENSG00000140K08550+K08551+K04451  
ko05134 ENSG00000137462;ENSG00000223K10159+K03156  
ko05212 ENSG00000112715;ENSG00000141K05448+K04451  
ko04664 ENSG00000223952;ENSG00000275K03156+K00461  
ko00603 ENSG00000102393 K01189  
ko01521 ENSG00000112715;ENSG00000128K05448+K05098  
ko00983 ENSG00000005381;ENSG00000160K10789+K17689  
ko04640 ENSG00000005961;ENSG00000223K06476+K03156+K06493  
ko04920 ENSG00000186951;ENSG00000223K07294+K03156  
ko05133 ENSG00000007171;ENSG00000223K13241+K03156  
ko04380 ENSG00000132170;ENSG00000223K08530+K03156+K06493  
ko04146 ENSG00000007171;ENSG00000120K13241+K08726  
ko00900 ENSG00000113161 K00021  
ko04512 ENSG00000005961;ENSG00000259K06476+K06493  
ko04145 ENSG00000005381;ENSG00000089K10789+K13240+K10159+K06493  
ko04970 ENSG00000089250;ENSG00000169K13240+K04142  
ko00340 ENSG00000111275 K00128  
ko04211 ENSG00000132170;ENSG00000141K08530+K04451  
ko04024 ENSG00000113448;ENSG00000169K13293+K04142+K07294  
ko04925 ENSG00000144891;ENSG00000179K04166+K07433  
ko04010 ENSG00000112715;ENSG00000128K05448+K05098+K04451+K03156  
ko04625 ENSG00000073756;ENSG00000223K11987+K03156  
ko04670 ENSG00000087245;ENSG00000100K01398+K01403  
ko04928 ENSG00000111424;ENSG00000113K08539+K13293  
ko00053 ENSG00000111275 K00128  
ko00030 ENSG00000160211 K00036  
ko00410 ENSG00000111275 K00128  
ko04620 ENSG00000137462;ENSG00000223K10159+K03156  
ko03410 ENSG00000100823 K10771  
ko04270 ENSG00000065534;ENSG00000142K00907+K04166  
ko04064 ENSG00000073756;ENSG00000223K11987+K03156  
ko00052 ENSG00000102393 K01189  
ko04152 ENSG00000113161;ENSG00000132K00021+K08530  
ko01523 ENSG00000223952 K03156  
ko04216 ENSG00000141510 K04451  
ko00620 ENSG00000111275 K00128  
ko05321 ENSG00000137462;ENSG00000223K10159+K03156  
ko00071 ENSG00000111275 K00128  
ko04210 ENSG00000141510;ENSG00000223K04451+K03156  
ko04261 ENSG00000144891;ENSG00000169K04166+K04142

|         |                              |                      |
|---------|------------------------------|----------------------|
| ko05162 | ENSG00000137462;ENSG00000141 | K10159+K04451        |
| ko04975 | ENSG00000145384              | K08751               |
| ko04310 | ENSG00000112033;ENSG00000141 | K04504+K04451        |
| ko00280 | ENSG00000111275              | K00128               |
| ko04978 | ENSG00000111424              | K08539               |
| ko04930 | ENSG00000223952              | K03156               |
| ko00600 | ENSG00000102393              | K01189               |
| ko04932 | ENSG00000186951;ENSG00000223 | K07294+K03156        |
| ko05225 | ENSG00000141510;ENSG00000164 | K04451+K11126        |
| ko00480 | ENSG00000160211              | K00036               |
| ko04730 | ENSG00000089250              | K13240               |
| ko02010 | ENSG00000085563              | K05658               |
| ko05213 | ENSG00000141510              | K04451               |
| ko00310 | ENSG00000111275              | K00128               |
| ko05217 | ENSG00000141510              | K04451               |
| ko05010 | ENSG00000089250;ENSG00000223 | K13240+K03156        |
| ko00010 | ENSG00000111275              | K00128               |
| ko05168 | ENSG00000137462;ENSG00000141 | K10159+K04451+K03156 |
| ko05223 | ENSG00000141510              | K04451               |
| ko05214 | ENSG00000141510              | K04451               |
| ko01524 | ENSG00000141510              | K04451               |
| ko04927 | ENSG00000144891              | K04166               |
| ko05218 | ENSG00000141510              | K04451               |
| ko04971 | ENSG00000065534              | K00907               |
| ko04622 | ENSG00000223952              | K03156               |
| ko05220 | ENSG00000141510              | K04451               |
| ko05016 | ENSG00000132170;ENSG00000141 | K08530+K04451        |
| ko05210 | ENSG00000141510              | K04451               |
| ko04350 | ENSG00000223952              | K03156               |
| ko05166 | ENSG00000141510;ENSG00000164 | K04451+K11126+K03156 |
| ko04912 | ENSG00000087245              | K01398               |
| ko04014 | ENSG00000112715;ENSG00000128 | K05448+K05098        |
| ko05132 | ENSG00000007171              | K13241               |
| ko04540 | ENSG00000102468              | K04157               |
| ko04713 | ENSG00000089250              | K13240               |
| ko04750 | ENSG00000102468              | K04157               |
| ko05032 | ENSG00000113448              | K13293               |
| ko04922 | ENSG00000186951              | K07294               |
| ko05203 | ENSG00000141510;ENSG00000160 | K04451+K04180        |
| ko05231 | ENSG00000100644              | K08268               |
| ko05310 | ENSG00000223952              | K03156               |
| ko04660 | ENSG00000223952              | K03156               |
| ko01200 | ENSG00000160211              | K00036               |
| ko04742 | ENSG00000169860              | K04270               |
| ko05164 | ENSG00000122194;ENSG00000223 | K01315+K03156        |
| ko04722 | ENSG00000141510              | K04451               |
| ko04110 | ENSG00000141510              | K04451               |
| ko04140 | ENSG00000100644              | K08268               |
| ko04142 | ENSG00000102393              | K01189               |
| ko04218 | ENSG00000106366;ENSG00000141 | K03982+K04451        |
| ko05330 | ENSG00000223952              | K03156               |
| ko04060 | ENSG00000160791;ENSG00000223 | K04180+K03156        |
| ko04072 | ENSG00000144891              | K04166               |
| ko05150 | ENSG00000122194              | K01315               |
| ko04390 | ENSG00000106366              | K03982               |
| ko04940 | ENSG00000223952              | K03156               |
| ko04723 | ENSG00000073756              | K11987               |
| ko04934 | ENSG00000144891              | K04166               |

|         |                 |        |
|---------|-----------------|--------|
| ko04150 | ENSG00000223952 | K03156 |
| ko04217 | ENSG00000223952 | K03156 |
| ko04659 | ENSG00000100644 | K08268 |
| ko00230 | ENSG00000113448 | K13293 |
| ko04621 | ENSG00000223952 | K03156 |
| ko04062 | ENSG00000160791 | K04180 |
| ko05322 | ENSG00000223952 | K03156 |
| ko04714 | ENSG00000132170 | K08530 |
| ko04144 | ENSG00000160791 | K04180 |
| ko05169 | ENSG00000141510 | K04451 |
| ko05332 | ENSG00000223952 | K03156 |
| ko04650 | ENSG00000223952 | K03156 |
| ko04612 | ENSG00000223952 | K03156 |
