# Supplementary material for: [Retracted] In Silico Identification and Mechanism Exploration of Active Ingredients against Stroke from An‐Gong‐Niu‐Huang‐Wan (AGNHW) Formula
Source: Hindawi journal article supplement (doi:10.1155/2022/5218993), 2022-01-01
Supplement: f5 [file 5218993.f5.pdf]

| Group1                      | Name                                      | Pubchem CID |
|-----------------------------|-------------------------------------------|-------------|
| REFJWTPEDVJJIY-UHFFFAOYS/   | Quercetin-7-olate                         | 46906036    |
| REFJWTPEDVJJIY-UHFFFAOYS/   | Quercetin                                 | 5280343     |
| QIQXTHQIDYTRH-UHFFFAOYS,    | Stearic acid                              | 5281        |
| ODKSFYDXXFIFQN-UHFFFAOYS    | 2-Azaniumyl-5-(diaminomethylideneamino)   | 59119146    |
| KZNIHFPLKGYRTM-UHFFFAOYS    | Apigenin-7-olate                          | 25200950    |
| KZNIHFPLKGYRTM-UHFFFAOYS    | Apigenin                                  | 5280443     |
| HFDVRLIODXPAHB-UHFFFAOYS    | 1-Tetradecene                             | 14260       |
| DANYIYRPLHHOCZ-UHFFFAOYS    | Acacetin                                  | 5280442     |
| TZBJGXHYKVUXJN-UHFFFAOYS    | Genistein(1-)                             | 25201420    |
| TZBJGXHYKVUXJN-UHFFFAOYS    | Genistein                                 | 5280961     |
| JVXZRQGOGOXCEC-UHFFFAOY     | Scutellarein                              | 5281697     |
| QAIPRVGONGVQAS-DUXPYHPU     | Caffeic acid                              | 689043      |
| OYHQOLUKZRVURQ-HZJYTTRN     | Linoleic acid                             | 5280450     |
| AWUBJLRYWHOLFW-WZUFQYTHSA-N |                                           |             |
| CXMXRPHRNRROMY-UHFFFAO\     | Sebacic acid                              | 5192        |
| GYHFUZHODSMOHU-UHFFFAO\     | Nonanal                                   | 31289       |
| KEMQGTRYUADPNZ-UHFFFAOY     | Heptadecanoic acid                        | 10465       |
| QZZGJDVWFLFXDLK-UHFFFAOY!   | Tetracosanoic acid                        | 11197       |
| RJWUMFHQJJBOD-UHFFFAOY      | 2-Methylheptadecane                       | 15265       |
| UKMSUNONTOPOIO-UHFFFAOY     | Docosanoic acid                           | 8215        |
| VKOBVWXKNCXXDE-UHFFFAO\     | Arachidic acid                            | 10467       |
| WQEPLUUGTLDZJY-UHFFFAOY!    | Pentadecanoic acid                        | 13849       |
| RECUKUPTGUEGMW-UHFFFAO\     | Carvacrol                                 | 10364       |
| ZFMSMUAANRZJFM-UHFFFAOY!    | Estragole                                 | 8815        |
| YXOLAZRVSSWPPT-UHFFFAOY     | Morin                                     | 5281670     |
| IPCSVZSSVZVIGE-UHFFFAOYS/   | Palmitic acid                             | 985         |
| FXNFHKRTJBSTCS-UHFFFAOYS    | Baicalein                                 | 5281605     |
| RTIXKCRFFJGDFG-UHFFFAOYS    | 7-Hydroxy-4-oxo-2-phenylchromen-5-olate   | 25200543    |
| RTIXKCRFFJGDFG-UHFFFAOYS    | Chrysin                                   | 5281607     |
| FTVWIRXFELQLPI-UHFFFAOYS/   | Naringenin                                | 932         |
| DLPRXTUOPLIHNV-FOCLMDBB     | 3-Octadecenoic acid                       | 5282751     |
| DTOSIQBPPRVQHS-IUQGRGSQ!    | 9,12,15-Octadecatrienoic acid             | 5282822     |
| FIKTURVKRGQNQD-VHEBQXMU     | trans-2-Icosenoic acid                    | 6438157     |
| FLIACVVOZYBSBS-UHFFFAOYS,   | Methyl palmitate                          | 8181        |
| FUGDHQXYVPQGLJ-UHFFFAOY     | Cyclotetradecanone                        | 77153       |
| GEHPRJRWZDWFBJ-FOCLMDBE     | 2-Heptadecenoic acid                      | 5282747     |
| IEDKVDCIEARIIU-UHFFFAOYSA-  | 2-Nonadecanone                            | 69423       |
| IGGUPRCHHJZPBS-UHFFFAOYS    | Nonacosane                                | 12409       |
| JESIHYIJKKUWIS-UHFFFAOYSA,  | 1-(4-Methylphenyl)ethanol                 | 10817       |
| JZQKTMZYLNHNFPL-BLHCBFLLS/  | 2,4-Decadienal                            | 5283349     |
| NDJKXXJCMXVBWU-UHFFFAOY!    | Heptadecane                               | 12398       |
| NHKDEMRRYWOJOF-UHFFFAO\     | Octadecanoic acid, hexacosyl ester        | 3085149     |
| OIPHBJBKSAKTTI-IVZWYUIFSA-I | (E,E,E)-N-(2-Methylpropyl)hexadeca-2,6,8- | 5281152     |
| OSOIQJGOYGSIMF-UHFFFAOYS    | Cyclopentadecanone                        | 10409       |
| OYHQOLUKZRVURQ-AVQMFFA!     | Linoelaidic acid                          | 5282457     |
| PCBKWKNYISJGPJ-BUHFOSPR     | 3-Hexadecenoic acid                       | 5312418     |
| RSLTVQQROJUNCD-ALCCZGGF     | 5-Cyclopentadecene-1-one                  | 5316264     |
| SECPZKHBENQXJG-BQYQJAHW     | 9-Hexadecenoic acid                       | 5282745     |
| SEKHAGCBKYMSBO-UHFFFAOY     | 5,9-Dimethyl-8-decenoic acid              | 21612893    |
| UOURIOWCMYPGGF-UHFFFAO\     | 3-Acetyl-2,6-dihydroxy-4-methoxybenzalde  | 610933      |
| XOEMDGMZEQVND-XXRVVYS       | 5-Cyclotetradecen-1-one                   | 5316269     |
| YCOZIPAWZNQLMR-UHFFFAOY!    | Pentadecane                               | 12391       |
| ZQPPMHVWECSIRJ-MDZDMXLP     | Elaidic acid                              | 637517      |
| BKIMMITUMNQMOS-UHFFFAOY     | Nonane                                    | 8141        |
| OLOOJGVNMBJLLR-UHFFFAOY!    | Imperatorin                               | 10212       |
| PAYRUJLWNCNPSJ-UHFFFAOY!    | Aniline                                   | 6115        |
| RRAFCDWBNXTKKO-UHFFFAO\     | Eugenol                                   | 3314        |

|                                                                                                                                     |           |
|-------------------------------------------------------------------------------------------------------------------------------------|-----------|
| GLZPCOQZEFWAFX-JXMROGB\ Geraniol                                                                                                    | 637566    |
| WPYMKLBDIGXBTP-UHFFFAOY\ Hydron;benzoate                                                                                            | 20144841  |
| WWZKQHOCKIZLMA-UHFFFAOY Octanoic acid                                                                                               | 379       |
| BPYKTIZUTYGOLE-IFADSCNNS\ Bilirubin                                                                                                 | 5280352   |
| OFYPDAKTVZXXPC-UHFFFAOY\ 5,7,2'-Trihydroxyflavone                                                                                   | 5322064   |
| SECPZKHBENQXJG-FPLPWBNI Palmitoleic acid                                                                                            | 445638    |
| TUNFSRHWOTWDNC-UHFFFAO Myristic acid                                                                                                | 11005     |
| XHEFDIBZLJXQHF-UHFFFAOYS\ Fisetin                                                                                                   | 5281614   |
| LNTHITQWFMADLM-UHFFFAOY\ Gallic acid                                                                                                | 370       |
| ZQPPMHVWECSIRJ-KTKRTIGZS Oleic acid                                                                                                 | 445639    |
| VFLDPWHFBUODDF-FCXRPNKF Curcumin                                                                                                    | 969516    |
| ZIUSSTSXXLLKKK-KOBPDAPS, (1E,4Z,6E)-5-Hydroxy-1,7-bis(4-hydroxy-3-NGSWKAQJJWESNS-ZZXKWVIF 4-Hydroxycinnamic acid                    | 5281767   |
| CKDRPCYJCDMPFO-UHFFFAOY 8a-Hydroxy-1,8-dimethyl-5-methylidene-5a                                                                    | 75144776  |
| CPGCVOVWHCWVTP-UHFFFAO Nonacosan-10-ol                                                                                              | 25240035  |
| CXENHBSYCFKJS-VDQVFBMK\ alpha-Farnesene                                                                                             | 5281516   |
| DAGYDJHSDMRWJX-UHFFFAOY Nonacosane-6,8-diol                                                                                         | 130335    |
| DJJQWLWXJHJPIH-UHFFFAOYS 4-(7-Hydroxy-4H-chromen-3-yl)benzene-1,;                                                                   | 101040114 |
| DTHUVZQMVMVXNB-LVSIQRNO [(4S,5R,6S)-5,6-Dihydroxy-5,6-dihydro-4H-FCXRFTLSXMRXTM-LBPRGKRZ\ (2S)-4',5,7-Trihydroxy-6-methoxyflavanone | 45098905  |
| FCXRFTLSXMRXTM-UHFFFAOY\ 5,7,4'-Trihydroxy-6-methoxyflavanone                                                                       | 46893290  |
| FFRFJIZJLZXEJX-PORYWJCVSA-N                                                                                                         | 5322074   |
| FPDSMLMTMDHJQT-UHFFFAOY Hydroxymuscovopyridine A                                                                                    | 184938    |
| FUZZWVXGSFPDMH-UHFFFAOY Hexanoic acid                                                                                               | 8892      |
| GYHKMDWFVHCCRA-UHFFFAO` 2-(2,4-Dihydroxyphenyl)-6-hydroxybenzofu                                                                    | 15480861  |
| HFPZCAJZSCWRBC-UHFFFAOY P-Cymene                                                                                                    | 7463      |
| HJFYFYWETUVIHT-UHFFFAOYS Tetrahydrodemethoxydiferuloylmethane                                                                       | 9906039   |
| IGWDEVSBEKYORK-UHFFFAOY Isoimperatorin                                                                                              | 68081     |
| IMNKABOILQOFDL-UHFFFAOYS, 3-Methyl-16-azabicyclo[10.3.1]hexadeca-11                                                                 | 5319970   |
| IQGURDMZNWKPEW-VHYPUYL\ (3E,9E)-Undeca-3,9-dienoic acid                                                                             | 52914864  |
| JSNRRGGBADWTMC-NTCAYCP\ beta-Farnesene                                                                                              | 5281517   |
| KVWWIYGFBYDJQC-GHMZBOCI Methyl (1R-trans)-3-oxo-2-pentylcyclopenta                                                                  | 1738124   |
| KVWWIYGFBYDJQC-UHFFFAOY Methyl dihydrojasmonate                                                                                     | 102861    |
| MLOIFQIPYKRTPY-KZZDLZNXSA` (1E,6E)-1-(4-Hydroxy-3-methoxyphenyl)-7-                                                                 | 44629981  |
| NDFKTBCGKNOHPJ-AATRIKPKS 2-Heptenal                                                                                                 | 5283316   |
| PFIXJSCFTAVWBW-UHFFFAOY\ Curcolone                                                                                                  | 5316208   |
| PUCHCUYBORIUSM-UHFFFAOY\ Methyl propyl disulfide                                                                                    | 16592     |
| PXPIJNMPDAFWSF-XBXARRHU\ (-)-(E)-1-(4-Hydroxyphenyl)-7-phenyl-6-hep                                                                 | 10039429  |
| QATWTDKFCQHTAE-UHFFFAOYSA-N                                                                                                         |           |
| QBGSGZFGDIXJTOI-UHFFFAOYS\ 15-Azabicyclo[9.3.1]pentadeca-1(15),11,13                                                                | 5320193   |
| RZGFUGXQKMEMOO-BSANDHC 12-Hydroxyjasmonic acid                                                                                      | 5497122   |
| SSRDTRQCJGXMGY-PXNMLYILSA-N                                                                                                         |           |
| UAHWPYUMFXFYJY-UHFFFAOY Myrcene                                                                                                     | 31253     |
| VFLDPWHFBUODDF-KYPMKJFL\ cis-Curcumin                                                                                               | 24884282  |
| VMDXHYHOJPKFEK-ADUATRDF Isofuranodiene                                                                                              | 5317424   |
| VSMOENVRRABVKN-UHFFFAOY 1-Octen-3-OL                                                                                                | 18827     |
| VZWGRQBCURJOMT-UHFFFAO` Dodecyl acetate                                                                                             | 8205      |
| WOLHVDCCOJEKFW-UHFFFAO` Methyl 2-(2-butyl-4-oxocyclopentyl)acetate                                                                  | 21862951  |
| WXGBJURRRZPBDS-UHFFFAOYSA-N                                                                                                         |           |
| WYIDBNAGSMCMET-UHFFFAOY Anhydroglycinol                                                                                             | 442667    |
| XBGUIVFBMBVUEG-PFONDFGA\ (E)-gamma-Bisabolene                                                                                       | 5352437   |
| XCZTYQQNVNLGKI-LVUHIJSRSA` 2beta-[(Z)-5-Hydroxy-2-pentenyl]-3-oxocycl                                                               | 101006119 |
| XEKNCTZVXNUNGMI-UHFFFAOY Hydroxymuscovopyridine B                                                                                   | 184939    |
| XVOHELPNOXGRBQ-LXQMTTSM Furanodienon                                                                                                | 6442374   |
| YVBAUDVGOFCUSG-UHFFFAOY 2-Pentylfuran                                                                                               | 19602     |
| YZPIVPVXEUAVNR-UHFFFAOYS 16-Azabicyclo[10.3.1]hexadeca-1(16),12,14                                                                  | 5316410   |
| ZLESWHXADLWJPV-YHYXMXQ\ 3,6,10-Trimethyl-4H,5H,6H,7H,8H,11H-cyc                                                                     | 13118283  |
| ZNWNWEHQFXOPGK-UHFFFAO Sebacaldehyde                                                                                                | 3016433   |

|                                                            |         |
|------------------------------------------------------------|---------|
| INVGWHRKADIJHF-UHFFFAOYS Sanguinarine                      | 5154    |
| GIKVSFNAEBQLGB-UHFFFAOYS 3',4',5',5',7-Pentamethoxyflavone | 493376  |
| MQBFFYQCZCKSBX-UHFFFAOY Gardenin A                         | 261859  |
| SBHXYTNGIZCORC-UHFFFAOYS (+/-)-Eriodictyol                 | 11095   |
| SBHXYTNGIZCORC-ZDUSSCGK Eriodictyol                        | 440735  |
| XLEYFDVVXLMULC-UHFFFAOYS 2',4',6'-Trihydroxyacetophenone   | 68073   |
| QMVPMAAFGQKVCJ-UHFFFAOY Citronellol                        | 8842    |
| XPOJSWHIKCNLEQ-UHFFFAOYS Cryptopine                        | 72616   |
| BBFQZRXYIEMAW-UHFFFAOYS Aristolochic acid                  | 2236    |
| QAIPRVGONGVQAS-RQOWECA cis-Caffeic acid                    | 1549111 |
| QUCQEUCGKKTEBI-UHFFFAOYS Palmatine                         | 19009   |
| PVFGJHYLIHMCQD-UHFFFAOYS 7,3',4'-Trihydroxyflavone         | 5322065 |
| YBHILYKTIRIUTE-UHFFFAOYSA- Berberine                       | 2353    |

| Group2   | Overlap | p        | adj-p    | J       | C       |
|----------|---------|----------|----------|---------|---------|
| C0038454 | 18      | 1.75E-16 | 1.80E-13 | 0.05505 | 0.18    |
| C0038454 | 18      | 1.75E-16 | 1.80E-13 | 0.05505 | 0.18    |
| C0038454 | 9       | 3.08E-12 | 3.17E-09 | 0.03475 | 0.3913  |
| C0038454 | 9       | 7.55E-12 | 7.77E-09 | 0.03448 | 0.36    |
| C0038454 | 12      | 3.82E-11 | 3.93E-08 | 0.0396  | 0.17143 |
| C0038454 | 12      | 3.82E-11 | 3.93E-08 | 0.0396  | 0.17143 |
| C0038454 | 8       | 4.19E-11 | 4.31E-08 | 0.03113 | 0.4     |
| C0038454 | 9       | 1.76E-10 | 1.82E-07 | 0.03333 | 0.26471 |
| C0038454 | 10      | 2.75E-10 | 2.83E-07 | 0.03521 | 0.20408 |
| C0038454 | 10      | 2.75E-10 | 2.83E-07 | 0.03521 | 0.20408 |
| C0038454 | 8       | 6.87E-10 | 7.07E-07 | 0.0303  | 0.2963  |
| C0038454 | 9       | 1.73E-09 | 1.78E-06 | 0.03226 | 0.2093  |
| C0038454 | 8       | 1.76E-09 | 1.81E-06 | 0.02996 | 0.26667 |
| C0038454 | 7       | 2.20E-09 | 2.26E-06 | 0.02713 | 0.35    |
| C0038454 | 7       | 2.20E-09 | 2.26E-06 | 0.02713 | 0.35    |
| C0038454 | 7       | 2.20E-09 | 2.26E-06 | 0.02713 | 0.35    |
| C0038454 | 7       | 2.20E-09 | 2.26E-06 | 0.02713 | 0.35    |
| C0038454 | 7       | 2.20E-09 | 2.26E-06 | 0.02713 | 0.35    |
| C0038454 | 7       | 2.20E-09 | 2.26E-06 | 0.02713 | 0.35    |
| C0038454 | 7       | 2.20E-09 | 2.26E-06 | 0.02713 | 0.35    |
| C0038454 | 7       | 2.20E-09 | 2.26E-06 | 0.02713 | 0.35    |
| C0038454 | 7       | 2.20E-09 | 2.26E-06 | 0.02713 | 0.35    |
| C0038454 | 7       | 2.20E-09 | 2.26E-06 | 0.02713 | 0.35    |
| C0038454 | 7       | 4.74E-09 | 4.88E-06 | 0.02692 | 0.31818 |
| C0038454 | 7       | 4.74E-09 | 4.88E-06 | 0.02692 | 0.31818 |
| C0038454 | 8       | 8.54E-09 | 8.78E-06 | 0.0293  | 0.22222 |
| C0038454 | 7       | 2.34E-08 | 2.41E-05 | 0.02642 | 0.25926 |
| C0038454 | 8       | 2.56E-08 | 2.63E-05 | 0.02878 | 0.19512 |
| C0038454 | 8       | 6.64E-08 | 6.83E-05 | 0.02827 | 0.17391 |
| C0038454 | 8       | 6.64E-08 | 6.83E-05 | 0.02827 | 0.17391 |
| C0038454 | 7       | 8.44E-08 | 8.69E-05 | 0.02593 | 0.21875 |
| C0038454 | 6       | 9.33E-08 | 9.61E-05 | 0.02317 | 0.3     |
| C0038454 | 6       | 9.33E-08 | 9.61E-05 | 0.02317 | 0.3     |
| C0038454 | 6       | 9.33E-08 | 9.61E-05 | 0.02317 | 0.3     |
| C0038454 | 6       | 9.33E-08 | 9.61E-05 | 0.02317 | 0.3     |
| C0038454 | 6       | 9.33E-08 | 9.61E-05 | 0.02317 | 0.3     |
| C0038454 | 6       | 9.33E-08 | 9.61E-05 | 0.02317 | 0.3     |
| C0038454 | 6       | 9.33E-08 | 9.61E-05 | 0.02317 | 0.3     |
| C0038454 | 6       | 9.33E-08 | 9.61E-05 | 0.02317 | 0.3     |
| C0038454 | 6       | 9.33E-08 | 9.61E-05 | 0.02317 | 0.3     |
| C0038454 | 6       | 9.33E-08 | 9.61E-05 | 0.02317 | 0.3     |
| C0038454 | 6       | 9.33E-08 | 9.61E-05 | 0.02317 | 0.3     |
| C0038454 | 6       | 9.33E-08 | 9.61E-05 | 0.02317 | 0.3     |
| C0038454 | 6       | 9.33E-08 | 9.61E-05 | 0.02317 | 0.3     |
| C0038454 | 6       | 9.33E-08 | 9.61E-05 | 0.02317 | 0.3     |
| C0038454 | 6       | 9.33E-08 | 9.61E-05 | 0.02317 | 0.3     |
| C0038454 | 6       | 9.33E-08 | 9.61E-05 | 0.02317 | 0.3     |
| C0038454 | 6       | 9.33E-08 | 9.61E-05 | 0.02317 | 0.3     |
| C0038454 | 6       | 9.33E-08 | 9.61E-05 | 0.02317 | 0.3     |
| C0038454 | 6       | 9.33E-08 | 9.61E-05 | 0.02317 | 0.3     |
| C0038454 | 6       | 9.33E-08 | 9.61E-05 | 0.02317 | 0.3     |
| C0038454 | 6       | 9.33E-08 | 9.61E-05 | 0.02317 | 0.3     |
| C0038454 | 6       | 9.33E-08 | 9.61E-05 | 0.02317 | 0.3     |
| C0038454 | 6       | 9.33E-08 | 9.61E-05 | 0.02317 | 0.3     |
| C0038454 | 6       | 9.33E-08 | 9.61E-05 | 0.02317 | 0.3     |
| C0038454 | 6       | 9.33E-08 | 9.61E-05 | 0.02317 | 0.3     |
| C0038454 | 6       | 9.33E-08 | 9.61E-05 | 0.02317 | 0.3     |
| C0038454 | 6       | 9.33E-08 | 9.61E-05 | 0.02317 | 0.3     |
| C0038454 | 6       | 1.29E-07 | 1.33E-04 | 0.02308 | 0.28571 |
| C0038454 | 6       | 1.29E-07 | 1.33E-04 | 0.02308 | 0.28571 |
| C0038454 | 6       | 1.29E-07 | 1.33E-04 | 0.02308 | 0.28571 |
| C0038454 | 6       | 1.29E-07 | 1.33E-04 | 0.02308 | 0.28571 |



|          |   |          |          |         |         |
|----------|---|----------|----------|---------|---------|
| C0038454 | 6 | 4.00E-06 | 4.11E-03 | 0.02182 | 0.16667 |
| C0038454 | 5 | 4.11E-06 | 4.23E-03 | 0.01916 | 0.2381  |
| C0038454 | 5 | 4.11E-06 | 4.23E-03 | 0.01916 | 0.2381  |
| C0038454 | 5 | 4.11E-06 | 4.23E-03 | 0.01916 | 0.2381  |
| C0038454 | 5 | 4.11E-06 | 4.23E-03 | 0.01916 | 0.2381  |
| C0038454 | 5 | 4.11E-06 | 4.23E-03 | 0.01916 | 0.2381  |
| C0038454 | 5 | 5.27E-06 | 5.42E-03 | 0.01908 | 0.22727 |
| C0038454 | 5 | 5.27E-06 | 5.42E-03 | 0.01908 | 0.22727 |
| C0038454 | 5 | 6.66E-06 | 6.86E-03 | 0.01901 | 0.21739 |
| C0038454 | 5 | 6.66E-06 | 6.86E-03 | 0.01901 | 0.21739 |
| C0038454 | 5 | 6.66E-06 | 6.86E-03 | 0.01901 | 0.21739 |
| C0038454 | 5 | 8.34E-06 | 8.58E-03 | 0.01894 | 0.20833 |
| C0038454 | 5 | 8.34E-06 | 8.58E-03 | 0.01894 | 0.20833 |
