# Supplementary material for: [Retracted] In Silico Identification and Mechanism Exploration of Active Ingredients against Stroke from An‐Gong‐Niu‐Huang‐Wan (AGNHW) Formula
Source: Hindawi journal article supplement (doi:10.1155/2022/5218993), 2022-01-01
Supplement: f6 [file 5218993.f6.pdf]

| SCU         | 0 $\mu$ M | 1 $\mu$ M | 2 $\mu$ M | 4 $\mu$ M | 8 $\mu$ M | 16 $\mu$ M | 0 $\mu$ M | 1 $\mu$ M |
|-------------|-----------|-----------|-----------|-----------|-----------|------------|-----------|-----------|
|             | 1.082     | 1.025     | 0.904     | 0.974     | 0.818     | 0.596      | 1.05      | 1.071     |
|             | 1.071     | 0.97      | 1.069     | 0.896     | 0.785     | 0.485      | 0.898     | 1.12      |
|             | 1.081     | 0.844     | 1.095     | 1.05      | 0.647     | 0.634      | 1.092     | 0.98      |
| Average     | 1.078     | 0.94633   | 1.02267   | 0.97333   | 0.75      | 0.57167    | 1.01333   | 1.057     |
| Cell Viabil | 100       | 87.786    | 94.867    | 90.2907   | 69.5733   | 53.0303    | 100       | 104.309   |

| CA          | 0 $\mu$ M | 6.25 $\mu$ M | 12.5 $\mu$ M | 25 $\mu$ M | 50 $\mu$ M | 150 $\mu$ M | 0 $\mu$ M | 6.25 $\mu$ M |
|-------------|-----------|--------------|--------------|------------|------------|-------------|-----------|--------------|
|             | 0.8       | 0.74         | 0.764        | 0.754      | 0.576      | 0.44        | 0.72      | 0.747        |
|             | 0.799     | 0.802        | 0.775        | 0.747      | 0.659      | 0.363       | 0.652     | 0.661        |
|             | 0.802     | 0.803        | 0.714        | 0.61       | 0.615      | 0.413       | 0.778     | 0.788        |
| Average     | 0.80033   | 0.78167      | 0.751        | 0.70367    | 0.61667    | 0.40533     | 0.71667   | 0.732        |
| Cell Viabil | 100       | 97.6676      | 93.8359      | 87.9217    | 77.0512    | 50.6456     | 100       | 102.14       |

| SPSS | SCU     |
|------|---------|
|      | 100     |
|      | 100     |
|      | 100     |
|      | 87.786  |
|      | 104.309 |
|      | 95.2483 |
|      | 94.867  |
|      | 97.8618 |
|      | 94.3593 |
|      | 90.2907 |
|      | 98.5526 |
|      | 97.4249 |
|      | 69.5733 |
|      | 77.7961 |
|      | 70.233  |
|      | 53.0303 |
|      | 66.5132 |
|      | 53.4335 |

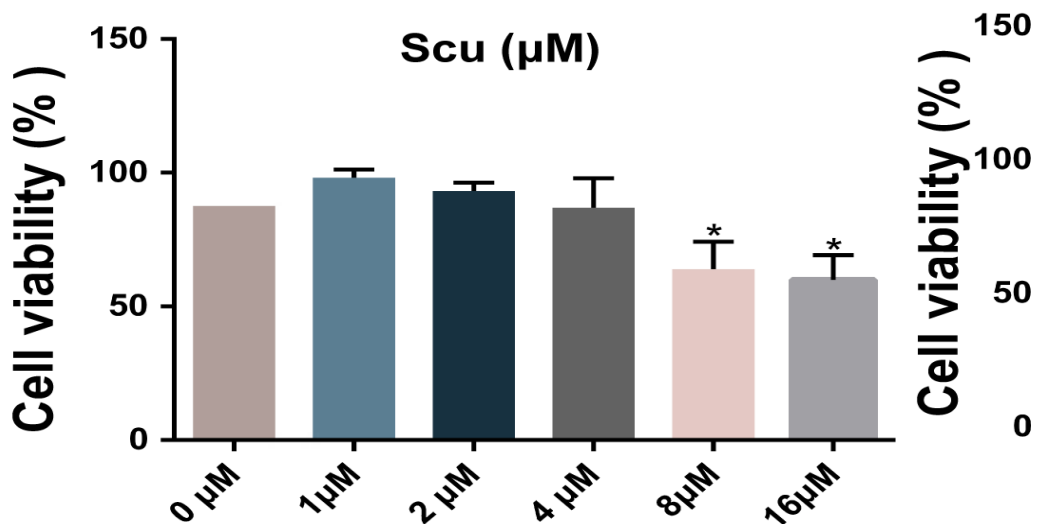

| 2 $\mu$ M | 4 $\mu$ M | 8 $\mu$ M | 16 $\mu$ M | 0 $\mu$ M | 1 $\mu$ M | 2 $\mu$ M | 4 $\mu$ M | 8 $\mu$ M |
|-----------|-----------|-----------|------------|-----------|-----------|-----------|-----------|-----------|
| 0.95      | 1.02      | 0.73      | 0.675      | 1.12      | 1.107     | 1.069     | 1.102     | 0.802     |
| 1.09      | 1.095     | 0.765     | 0.751      | 1.061     | 0.98      | 0.924     | 1.095     | 0.735     |
| 0.935     | 0.881     | 0.87      | 0.596      | 1.081     | 1.02      | 1.085     | 0.981     | 0.754     |
| 0.99167   | 0.99867   | 0.78833   | 0.674      | 1.08733   | 1.03567   | 1.026     | 1.05933   | 0.76367   |
| 97.8618   | 98.5526   | 77.7961   | 66.5132    | 100       | 95.2483   | 94.3593   | 97.4249   | 70.233    |

| 12.5 $\mu$ M | 25 $\mu$ M | 50 $\mu$ M | 150 $\mu$ M | 0 $\mu$ M | 6.25 $\mu$ M | 12.5 $\mu$ M | 25 $\mu$ M | 50 $\mu$ M |
|--------------|------------|------------|-------------|-----------|--------------|--------------|------------|------------|
| 0.716        | 0.77       | 0.46       | 0.417       | 0.845     | 0.767        | 0.764        | 0.787      | 0.715      |
| 0.632        | 0.68       | 0.556      | 0.361       | 0.899     | 0.854        | 0.775        | 0.861      | 0.647      |
| 0.741        | 0.719      | 0.445      | 0.385       | 0.802     | 0.789        | 0.794        | 0.719      | 0.536      |
| 0.69633      | 0.723      | 0.487      | 0.38767     | 0.84867   | 0.80333      | 0.77767      | 0.789      | 0.63267    |
| 97.1628      | 100.884    | 67.9535    | 54.093      | 100       | 94.6583      | 91.6339      | 92.9694    | 74.5483    |

CA

|         |         |         |         |
|---------|---------|---------|---------|
| 100     |         |         |         |
| 100     |         |         |         |
| 100     |         |         |         |
| 97.6676 | 100     | 102.14  | 94.6583 |
| 102.14  | 97.6676 | 97.1628 | 91.6339 |
| 94.6583 | 93.8359 | 87.9217 | 100.884 |
| 93.8359 | 87.9217 | 77.0512 | 67.9535 |
| 97.1628 | 77.0512 | 67.9535 | 74.5483 |
| 91.6339 | 67.9535 | 50.6456 | 54.093  |
| 87.9217 | 50.6456 | 54.093  | 51.5711 |
| 100.884 | 54.093  |         |         |
| 92.9694 | 51.5711 |         |         |
| 77.0512 |         |         |         |
| 67.9535 |         |         |         |
| 74.5483 |         |         |         |
| 50.6456 |         |         |         |
| 54.093  |         |         |         |
| 51.5711 |         |         |         |

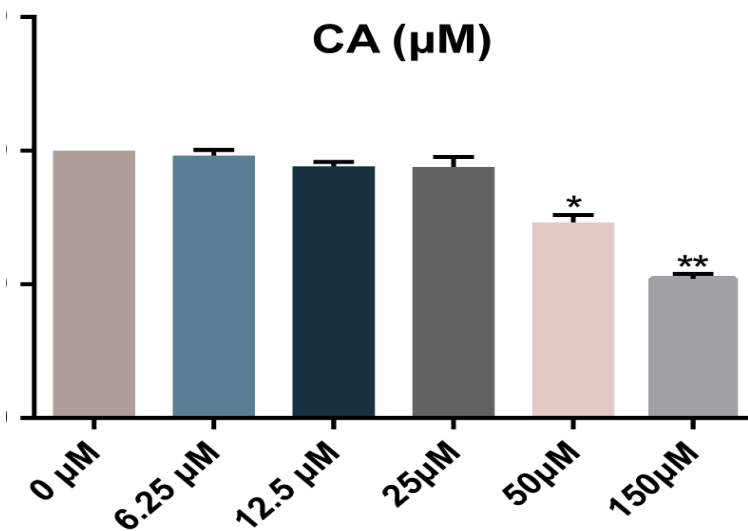

16 $\mu$ M

0.556

0.601

0.586

0.581

53.4335

150 $\mu$ M

0.414

0.486

0.413

0.43767

51.5711
