# Supplementary material for: [Retracted] In Silico Identification and Mechanism Exploration of Active Ingredients against Stroke from An‐Gong‐Niu‐Huang‐Wan (AGNHW) Formula
Source: Hindawi journal article supplement (doi:10.1155/2022/5218993), 2022-01-01
Supplement: f7 [file 5218993.f7.pdf]

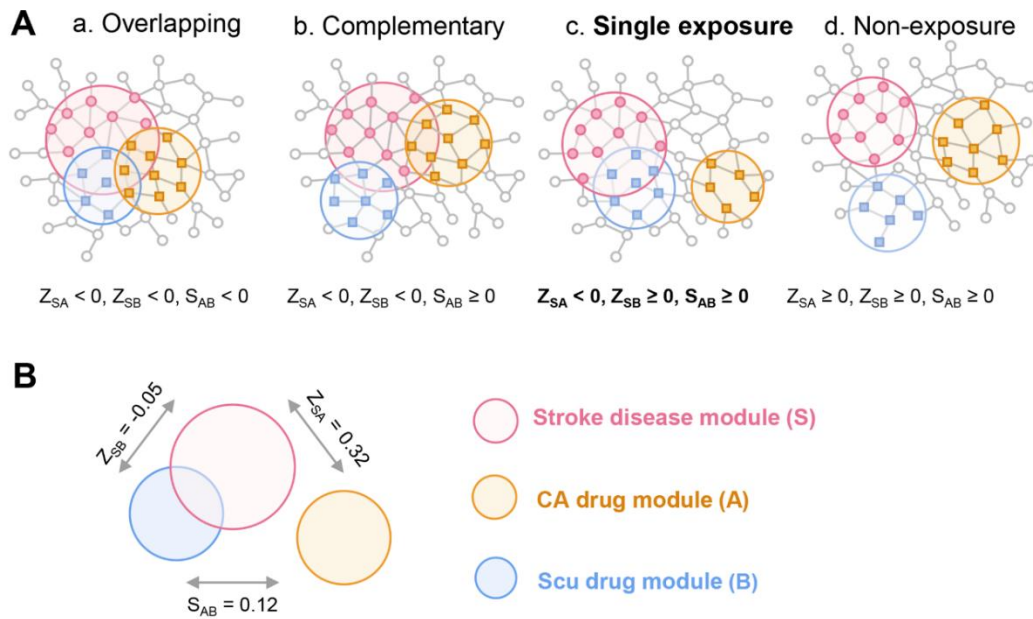

**Figure S1. Network-based drug combinations for stroke therapy.** (A) The possible exposure mode of disease module (stroke) to the pairwise drug combinations. We asserted that it was an effective drug combination that would be captured by the “Complementary Exposure” pattern. If the two drug-target modules both overlapped with disease module, but were separated in the human interactome.  $Z_{SA}$  and  $Z_{SB}$  represent the network proximity (Z-score) between targets of drugs (SCU and CA) and stroke module.  $S_{AB}$  represents separation score of targets between CA and SCU. (B) Network proximity analysis suggests that SCU and CA is not a potential drug combination for stroke therapy.
